# Supplementary material for: Pan-tissue transcriptome analysis reveals sex-dimorphic human aging
Source: eLife. 2025 Oct 3;13:RP102449. doi: 10.7554/eLife.102449 (PMC12494380; doi:10.7554/eLife.102449)
Supplement: Supplementary file 3. [file elife-102449-supp3.xlsx]

## Sheet: Tissue_labels
Table S3. Sex-stratified differential analysis
Tissue labels
1	Adipose-Subcutaneous
2	Adipose-Visceral(Omentum)
3	AdrenalGland
4	Artery-Aorta
5	Artery-Coronary
6	Artery-Tibial
7	Brain_DECISION
8	Brain_HORMONE
9	Brain_MEMORY
10	Brain_MOVEMENT
11	Breast-MammaryTissue
12	Cells-Culturedfibroblasts
13	Cells-EBV-transformedlymphocytes
14	Colon-Sigmoid
15	Colon-Transverse
16	Esophagus-GastroesophagealJunction
17	Esophagus-Mucosa
18	Esophagus-Muscularis
19	Heart-AtrialAppendage
20	Heart-LeftVentricle
21	Kidney-Cortex
22	Liver
23	Lung
24	MinorSalivaryGland
25	Muscle-Skeletal
26	Nerve-Tibial
27	Pancreas
28	Pituitary
29	Skin-NotSunExposed(Suprapubic)
30	Skin-SunExposed(Lowerleg)
31	SmallIntestine-TerminalIleum
32	Spleen
33	Stomach
34	Thyroid
35	WholeBlood

## Sheet: DEGs
Table S3. Sex-stratified age-associated genes
symbol	Class	tissue
GGCT	sex-common	1
ABHD5	sex-common	1
LMO3	sex-common	1
PTGER3	sex-common	1
HEBP2	sex-common	1
NNAT	sex-common	1
SPEG	sex-common	1
TRHDE	sex-common	1
GLI2	sex-common	1
MOCOS	sex-common	1
ACACB	sex-common	1
NRCAM	sex-common	1
PNPLA3	sex-common	1
OXT	sex-common	1
FGF14	sex-common	1
NDRG4	sex-common	1
MINDY4	sex-common	1
DNM1	sex-common	1
ACTA2	sex-common	1
MAP3K8	sex-common	1
FAM20A	sex-common	1
GLI1	sex-common	1
C7	sex-common	1
GHR	sex-common	1
FN1	sex-common	1
SDC1	sex-common	1
GALNT12	sex-common	1
PTGIS	sex-common	1
PPP1R1B	sex-common	1
ECHDC3	sex-common	1
B4GALNT1	sex-common	1
GLUL	sex-common	1
SLC19A3	sex-common	1
STAMBPL1	sex-common	1
HAPLN3	sex-common	1
PRDM16	sex-common	1
ANKRD53	sex-common	1
ZNF385B	sex-common	1
CNTN4	sex-common	1
IL17RD	sex-common	1
ACSL1	sex-common	1
ABCA10	sex-common	1
FZD1	sex-common	1
PYHIN1	sex-common	1
AIM2	sex-common	1
CDS1	sex-common	1
DEFB1	sex-common	1
STOX1	sex-common	1
FBN1	sex-common	1
PLD4	sex-common	1
PEX11A	sex-common	1
SCARA5	sex-common	1
TNXB	sex-common	1
FASN	sex-common	1
PFKFB3	sex-common	1
ORMDL3	sex-common	1
PDP2	sex-common	1
PC	sex-common	1
BOK	sex-common	1
SHMT1	sex-common	1
TMEM132C	sex-common	1
BEX5	sex-common	1
OLFML2A	sex-common	1
NAT8L	sex-common	1
IRS2	sex-common	1
MAPT	sex-common	1
C6orf132	sex-common	1
PDLIM7	sex-common	1
GJC2	sex-common	1
MT1A	sex-common	1
CPEB1	sex-common	1
PLXNA4	sex-common	1
C12orf75	sex-common	1
CEBPA	sex-common	1
INMT-MINDY4	sex-common	1
LIMS4	sex-common	1
AC112229.3	sex-common	1
SPON1	sex-common	1
TMSB15B	sex-common	1
RASL10B	sex-common	1
AC013271.1	sex-common	1
AC022414.1	sex-common	1
AC053503.6	sex-common	1
AC025165.6	sex-common	1
UPP2	sex-biased (female)	1
MLXIPL	sex-biased (female)	1
DCN	sex-biased (female)	1
MARCO	sex-biased (female)	1
BIRC3	sex-biased (female)	1
TLL1	sex-biased (female)	1
DKK3	sex-biased (female)	1
GYG2	sex-biased (female)	1
MAOB	sex-biased (female)	1
FBLN1	sex-biased (female)	1
SYNJ2	sex-biased (female)	1
PGM1	sex-biased (female)	1
COL16A1	sex-biased (female)	1
LTBP4	sex-biased (female)	1
EPB41L4B	sex-biased (female)	1
TSPAN15	sex-biased (female)	1
SLC25A1	sex-biased (female)	1
APOL4	sex-biased (female)	1
PCK2	sex-biased (female)	1
PTK6	sex-biased (female)	1
ISM1	sex-biased (female)	1
PLCB4	sex-biased (female)	1
PGRMC1	sex-biased (female)	1
GABRE	sex-biased (female)	1
MMP15	sex-biased (female)	1
FAH	sex-biased (female)	1
PLAT	sex-biased (female)	1
MYH14	sex-biased (female)	1
HAS1	sex-biased (female)	1
SCN1B	sex-biased (female)	1
MEST	sex-biased (female)	1
NT5DC3	sex-biased (female)	1
SOD2	sex-biased (female)	1
BMP5	sex-biased (female)	1
MDFI	sex-biased (female)	1
PDE8B	sex-biased (female)	1
HES1	sex-biased (female)	1
PECR	sex-biased (female)	1
IL18RAP	sex-biased (female)	1
TSPAN1	sex-biased (female)	1
PRDX6	sex-biased (female)	1
MREG	sex-biased (female)	1
CCN2	sex-biased (female)	1
PPL	sex-biased (female)	1
RDH10	sex-biased (female)	1
CAT	sex-biased (female)	1
PRXL2A	sex-biased (female)	1
ACO1	sex-biased (female)	1
ACVR1C	sex-biased (female)	1
G0S2	sex-biased (female)	1
NEURL2	sex-biased (female)	1
XG	sex-biased (female)	1
CD70	sex-biased (female)	1
TNFRSF19	sex-biased (female)	1
GNAI1	sex-biased (female)	1
TST	sex-biased (female)	1
HOXD9	sex-biased (female)	1
ISLR	sex-biased (female)	1
NRL	sex-biased (female)	1
ITGB4	sex-biased (female)	1
RIDA	sex-biased (female)	1
ANKEF1	sex-biased (female)	1
SLC43A3	sex-biased (female)	1
DTX1	sex-biased (female)	1
NT5E	sex-biased (female)	1
PPP1R1A	sex-biased (female)	1
LRRC1	sex-biased (female)	1
ITGA11	sex-biased (female)	1
GCHFR	sex-biased (female)	1
HADH	sex-biased (female)	1
ESYT1	sex-biased (female)	1
WDR93	sex-biased (female)	1
GREB1L	sex-biased (female)	1
PGD	sex-biased (female)	1
PTPRF	sex-biased (female)	1
ECM1	sex-biased (female)	1
ETNK2	sex-biased (female)	1
ACKR2	sex-biased (female)	1
ALDH1L1	sex-biased (female)	1
CRHBP	sex-biased (female)	1
PTGES	sex-biased (female)	1
SPATA25	sex-biased (female)	1
SETBP1	sex-biased (female)	1
PDE3B	sex-biased (female)	1
ZNF117	sex-biased (female)	1
MRAS	sex-biased (female)	1
PFKFB1	sex-biased (female)	1
COPG2	sex-biased (female)	1
ACOX1	sex-biased (female)	1
CD300LG	sex-biased (female)	1
MEGF6	sex-biased (female)	1
SNED1	sex-biased (female)	1
COQ8A	sex-biased (female)	1
ELOVL7	sex-biased (female)	1
EGFLAM	sex-biased (female)	1
NIPSNAP3B	sex-biased (female)	1
AQP7	sex-biased (female)	1
CLMP	sex-biased (female)	1
CYB5A	sex-biased (female)	1
PLIN1	sex-biased (female)	1
IGFBP6	sex-biased (female)	1
RAB3IL1	sex-biased (female)	1
GLYCTK	sex-biased (female)	1
AR	sex-biased (female)	1
AGPAT2	sex-biased (female)	1
TTC36	sex-biased (female)	1
SNTG2	sex-biased (female)	1
CES4A	sex-biased (female)	1
LVRN	sex-biased (female)	1
MRGPRF	sex-biased (female)	1
TNK1	sex-biased (female)	1
PCSK1	sex-biased (female)	1
LPL	sex-biased (female)	1
CIDEA	sex-biased (female)	1
GJC3	sex-biased (female)	1
PLAAT3	sex-biased (female)	1
SSC5D	sex-biased (female)	1
CYP8B1	sex-biased (female)	1
ADIPOQ	sex-biased (female)	1
TSKU	sex-biased (female)	1
PLCXD3	sex-biased (female)	1
SLC25A10	sex-biased (female)	1
GAS6	sex-biased (female)	1
SORCS2	sex-biased (female)	1
ARL15	sex-biased (female)	1
AHNAK2	sex-biased (female)	1
MTARC1	sex-biased (female)	1
FAM180A	sex-biased (female)	1
KIAA0408	sex-biased (female)	1
CACNA1H	sex-biased (female)	1
DPP4	sex-biased (female)	1
MAP1LC3C	sex-biased (female)	1
ERO1A	sex-biased (female)	1
ITGBL1	sex-biased (female)	1
DDR1	sex-biased (female)	1
ZDHHC11B	sex-biased (female)	1
COLCA2	sex-biased (female)	1
TENM3	sex-biased (female)	1
C4B	sex-biased (female)	1
ADM5	sex-biased (female)	1
CYP21A2	sex-biased (female)	1
AP000781.2	sex-biased (female)	1
TRABD2B	sex-biased (female)	1
FAM47E-STBD1	sex-biased (female)	1
AL445423.3	sex-biased (female)	1
CAMKK1	sex-biased (male)	1
ABCB5	sex-biased (male)	1
SCN4A	sex-biased (male)	1
PLEKHG6	sex-biased (male)	1
TENM1	sex-biased (male)	1
SEMA3B	sex-biased (male)	1
RUNX3	sex-biased (male)	1
ABCC2	sex-biased (male)	1
HSD17B6	sex-biased (male)	1
FAS	sex-biased (male)	1
TIMP2	sex-biased (male)	1
RAI14	sex-biased (male)	1
RETSAT	sex-biased (male)	1
ARAP2	sex-biased (male)	1
CP	sex-biased (male)	1
FOXC1	sex-biased (male)	1
CYFIP2	sex-biased (male)	1
ITIH4	sex-biased (male)	1
SLC2A3	sex-biased (male)	1
EYA2	sex-biased (male)	1
CACNB1	sex-biased (male)	1
PDZD4	sex-biased (male)	1
REEP1	sex-biased (male)	1
DRD4	sex-biased (male)	1
IRAG1	sex-biased (male)	1
PAK3	sex-biased (male)	1
ITGA8	sex-biased (male)	1
LIPE	sex-biased (male)	1
IGSF9B	sex-biased (male)	1
AACS	sex-biased (male)	1
TRAF5	sex-biased (male)	1
OVGP1	sex-biased (male)	1
DOCK3	sex-biased (male)	1
P2RX7	sex-biased (male)	1
MYH7	sex-biased (male)	1
TYRO3	sex-biased (male)	1
PHGDH	sex-biased (male)	1
TPSD1	sex-biased (male)	1
ARVCF	sex-biased (male)	1
SUSD2	sex-biased (male)	1
GALNT16	sex-biased (male)	1
PAPLN	sex-biased (male)	1
DOK5	sex-biased (male)	1
WFDC2	sex-biased (male)	1
RASL12	sex-biased (male)	1
FCER2	sex-biased (male)	1
OLFM2	sex-biased (male)	1
NKG7	sex-biased (male)	1
PLA2G4C	sex-biased (male)	1
PLEKHA4	sex-biased (male)	1
PRUNE2	sex-biased (male)	1
OGN	sex-biased (male)	1
NCS1	sex-biased (male)	1
KAZALD1	sex-biased (male)	1
ASPA	sex-biased (male)	1
P2RX1	sex-biased (male)	1
SGCA	sex-biased (male)	1
CPE	sex-biased (male)	1
CD5	sex-biased (male)	1
MDK	sex-biased (male)	1
KRT18	sex-biased (male)	1
MGP	sex-biased (male)	1
ENO2	sex-biased (male)	1
APOBEC1	sex-biased (male)	1
CEP85L	sex-biased (male)	1
BAG2	sex-biased (male)	1
RAB23	sex-biased (male)	1
SMOC2	sex-biased (male)	1
HBEGF	sex-biased (male)	1
CDH6	sex-biased (male)	1
COL7A1	sex-biased (male)	1
PDE1A	sex-biased (male)	1
VAX2	sex-biased (male)	1
ATP6V1B1	sex-biased (male)	1
DHCR24	sex-biased (male)	1
TNNI3K	sex-biased (male)	1
TFAP2E	sex-biased (male)	1
GBP1	sex-biased (male)	1
CDK18	sex-biased (male)	1
PTCH2	sex-biased (male)	1
LTBP2	sex-biased (male)	1
DUSP1	sex-biased (male)	1
EGR1	sex-biased (male)	1
ADRA1A	sex-biased (male)	1
PDLIM2	sex-biased (male)	1
CPXM2	sex-biased (male)	1
XPNPEP2	sex-biased (male)	1
CNTFR	sex-biased (male)	1
RAB9B	sex-biased (male)	1
KLHL31	sex-biased (male)	1
COL21A1	sex-biased (male)	1
CPNE5	sex-biased (male)	1
BFSP1	sex-biased (male)	1
NR1D1	sex-biased (male)	1
FGFRL1	sex-biased (male)	1
KLF2	sex-biased (male)	1
ZFP36	sex-biased (male)	1
SMO	sex-biased (male)	1
LRRC17	sex-biased (male)	1
LOXL1	sex-biased (male)	1
LBP	sex-biased (male)	1
GDF15	sex-biased (male)	1
LSP1	sex-biased (male)	1
SLC6A8	sex-biased (male)	1
EDA2R	sex-biased (male)	1
ANO1	sex-biased (male)	1
TRIM22	sex-biased (male)	1
RAMP1	sex-biased (male)	1
SNAP25	sex-biased (male)	1
ZBED3	sex-biased (male)	1
SLC14A2	sex-biased (male)	1
PEMT	sex-biased (male)	1
LGALS12	sex-biased (male)	1
RNF122	sex-biased (male)	1
BHLHE40	sex-biased (male)	1
TRIM45	sex-biased (male)	1
RERG	sex-biased (male)	1
FADS2	sex-biased (male)	1
AHI1	sex-biased (male)	1
NIBAN1	sex-biased (male)	1
LMO7	sex-biased (male)	1
GPNMB	sex-biased (male)	1
IL6	sex-biased (male)	1
IL33	sex-biased (male)	1
SULF1	sex-biased (male)	1
DUSP5	sex-biased (male)	1
MNS1	sex-biased (male)	1
ETV6	sex-biased (male)	1
MYOCD	sex-biased (male)	1
SPATA22	sex-biased (male)	1
ZMYND15	sex-biased (male)	1
CCN1	sex-biased (male)	1
CYP4B1	sex-biased (male)	1
SLC44A3	sex-biased (male)	1
ACTA1	sex-biased (male)	1
MALL	sex-biased (male)	1
NFKBIZ	sex-biased (male)	1
PLA1A	sex-biased (male)	1
PLK2	sex-biased (male)	1
C1QTNF2	sex-biased (male)	1
MYLK4	sex-biased (male)	1
SCUBE3	sex-biased (male)	1
TBC1D32	sex-biased (male)	1
ARHGAP39	sex-biased (male)	1
CDKN2B	sex-biased (male)	1
AOPEP	sex-biased (male)	1
HMCN2	sex-biased (male)	1
FADS1	sex-biased (male)	1
MPZL2	sex-biased (male)	1
TAGLN	sex-biased (male)	1
JPH2	sex-biased (male)	1
KIAA1755	sex-biased (male)	1
KLRF1	sex-biased (male)	1
ADGRL3	sex-biased (male)	1
CACNA1C	sex-biased (male)	1
CCDC3	sex-biased (male)	1
TMEM178A	sex-biased (male)	1
NR4A2	sex-biased (male)	1
PTPRD	sex-biased (male)	1
PDLIM3	sex-biased (male)	1
APCDD1	sex-biased (male)	1
MARVELD1	sex-biased (male)	1
MAP3K7CL	sex-biased (male)	1
GPR153	sex-biased (male)	1
STC1	sex-biased (male)	1
CSRP1	sex-biased (male)	1
TPPP3	sex-biased (male)	1
PTGIR	sex-biased (male)	1
PCSK7	sex-biased (male)	1
S100A1	sex-biased (male)	1
IER2	sex-biased (male)	1
FBXL13	sex-biased (male)	1
MFSD12	sex-biased (male)	1
ITIH3	sex-biased (male)	1
PRKAA2	sex-biased (male)	1
ALPL	sex-biased (male)	1
VCAM1	sex-biased (male)	1
ATF3	sex-biased (male)	1
FRZB	sex-biased (male)	1
ZC3H12A	sex-biased (male)	1
KLF15	sex-biased (male)	1
EDIL3	sex-biased (male)	1
CDC20B	sex-biased (male)	1
GPX8	sex-biased (male)	1
TMEM200A	sex-biased (male)	1
KCNK5	sex-biased (male)	1
SLC29A4	sex-biased (male)	1
SYTL3	sex-biased (male)	1
SBSPON	sex-biased (male)	1
MICALL2	sex-biased (male)	1
ALDH1A1	sex-biased (male)	1
VEGFD	sex-biased (male)	1
ARL5B	sex-biased (male)	1
GPT2	sex-biased (male)	1
C2	sex-biased (male)	1
DENND2B	sex-biased (male)	1
MFAP4	sex-biased (male)	1
WEE1	sex-biased (male)	1
RRAD	sex-biased (male)	1
FAM102A	sex-biased (male)	1
PRRT2	sex-biased (male)	1
CA4	sex-biased (male)	1
NFKBID	sex-biased (male)	1
CD300A	sex-biased (male)	1
VASN	sex-biased (male)	1
BDKRB2	sex-biased (male)	1
PHYHIP	sex-biased (male)	1
NPNT	sex-biased (male)	1
CCDC8	sex-biased (male)	1
MRAP	sex-biased (male)	1
JUNB	sex-biased (male)	1
GATM	sex-biased (male)	1
CALB2	sex-biased (male)	1
IL17D	sex-biased (male)	1
ZMAT3	sex-biased (male)	1
BNC2	sex-biased (male)	1
SLC2A14	sex-biased (male)	1
HSPB7	sex-biased (male)	1
PLK3	sex-biased (male)	1
C1QTNF1	sex-biased (male)	1
SLC29A2	sex-biased (male)	1
PRIMA1	sex-biased (male)	1
HSD11B2	sex-biased (male)	1
TCIM	sex-biased (male)	1
JUN	sex-biased (male)	1
MYOZ1	sex-biased (male)	1
CD28	sex-biased (male)	1
EGR3	sex-biased (male)	1
FOXS1	sex-biased (male)	1
FGD6	sex-biased (male)	1
BGN	sex-biased (male)	1
NTM	sex-biased (male)	1
HCAR2	sex-biased (male)	1
SLC25A18	sex-biased (male)	1
TCEAL7	sex-biased (male)	1
WFDC10B	sex-biased (male)	1
C12orf60	sex-biased (male)	1
CABCOCO1	sex-biased (male)	1
OLFML1	sex-biased (male)	1
CFAP91	sex-biased (male)	1
GPR173	sex-biased (male)	1
PDE4B	sex-biased (male)	1
TRARG1	sex-biased (male)	1
FLRT2	sex-biased (male)	1
HS6ST3	sex-biased (male)	1
NR2F2	sex-biased (male)	1
NTF3	sex-biased (male)	1
SLC51B	sex-biased (male)	1
NAP1L3	sex-biased (male)	1
C17orf58	sex-biased (male)	1
GCNT1	sex-biased (male)	1
CIDEC	sex-biased (male)	1
DPPA3	sex-biased (male)	1
COL4A5	sex-biased (male)	1
CENPP	sex-biased (male)	1
GPR21	sex-biased (male)	1
PLAC9	sex-biased (male)	1
SERPINA3	sex-biased (male)	1
FAM180B	sex-biased (male)	1
LAMB3	sex-biased (male)	1
HCAR1	sex-biased (male)	1
GAL3ST4	sex-biased (male)	1
SULT1A2	sex-biased (male)	1
DACT3	sex-biased (male)	1
STMN3	sex-biased (male)	1
GZMM	sex-biased (male)	1
MFAP5	sex-biased (male)	1
ADAMTSL2	sex-biased (male)	1
DEFB107B	sex-biased (male)	1
CLEC4C	sex-biased (male)	1
TPM2	sex-biased (male)	1
HLA-DRB5	sex-biased (male)	1
PLN	sex-biased (male)	1
RYR2	sex-biased (male)	1
RYR3	sex-biased (male)	1
TCEA3	sex-biased (male)	1
C4orf47	sex-biased (male)	1
MT1M	sex-biased (male)	1
NANOGNB	sex-biased (male)	1
CFAP45	sex-biased (male)	1
HAUS7	sex-biased (male)	1
HLA-DPB1	sex-biased (male)	1
PRRT4	sex-biased (male)	1
ORM2	sex-biased (male)	1
ORM1	sex-biased (male)	1
APOBEC3G	sex-biased (male)	1
STRIT1	sex-biased (male)	1
AC006254.1	sex-biased (male)	1
SCARF2	sex-biased (male)	1
LIMS3	sex-biased (male)	1
AL355102.2	sex-biased (male)	1
MUSTN1	sex-biased (male)	1
RAB7B	sex-biased (male)	1
MARCKS	sex-biased (male)	1
FO681492.1	sex-biased (male)	1
AC009133.6	sex-biased (male)	1
PRR33	sex-biased (male)	1
AC104304.2	sex-biased (male)	1
SLURP2	sex-biased (male)	1
AC104389.6	sex-biased (male)	1
AC022506.1	sex-biased (male)	1
TNMD	sex-common	2
ANKIB1	sex-common	2
RBM5	sex-common	2
VPS50	sex-common	2
ABCB5	sex-common	2
DVL2	sex-common	2
CROT	sex-common	2
KMT2E	sex-common	2
KDM7A	sex-common	2
IFRD1	sex-common	2
VPS41	sex-common	2
FMO3	sex-common	2
RANBP9	sex-common	2
DYRK4	sex-common	2
STARD3NL	sex-common	2
MBTD1	sex-common	2
RABGAP1	sex-common	2
MAP4K3	sex-common	2
BRCA1	sex-common	2
RUFY3	sex-common	2
VRK2	sex-common	2
VEZT	sex-common	2
FAM13B	sex-common	2
ZCCHC8	sex-common	2
ZZZ3	sex-common	2
FBXO42	sex-common	2
OFD1	sex-common	2
TPR	sex-common	2
USP28	sex-common	2
CC2D2A	sex-common	2
RRM2B	sex-common	2
LMO3	sex-common	2
RSF1	sex-common	2
LIMA1	sex-common	2
GALC	sex-common	2
TAB2	sex-common	2
ATG5	sex-common	2
CROCC	sex-common	2
TARBP1	sex-common	2
GUCY1B1	sex-common	2
GPBP1	sex-common	2
SLC6A16	sex-common	2
INTS13	sex-common	2
EYA2	sex-common	2
PMS1	sex-common	2
PKN2	sex-common	2
ANKRD44	sex-common	2
ATXN3	sex-common	2
MTFR1	sex-common	2
ROCK1	sex-common	2
ELP1	sex-common	2
TMEM260	sex-common	2
HLTF	sex-common	2
SCARB1	sex-common	2
GLI2	sex-common	2
EED	sex-common	2
FMO4	sex-common	2
GPATCH1	sex-common	2
NT5C2	sex-common	2
FBLN1	sex-common	2
PIK3C3	sex-common	2
TULP3	sex-common	2
MLLT10	sex-common	2
PCM1	sex-common	2
CBFA2T2	sex-common	2
PKD2L2	sex-common	2
THOC1	sex-common	2
FKBP7	sex-common	2
OPHN1	sex-common	2
STX7	sex-common	2
RABL2B	sex-common	2
SLC4A4	sex-common	2
SMARCA2	sex-common	2
RBL1	sex-common	2
PCNP	sex-common	2
EXD2	sex-common	2
PCDHB4	sex-common	2
PCDHA6	sex-common	2
CCNT2	sex-common	2
ITGAE	sex-common	2
TDRD3	sex-common	2
CHMP2B	sex-common	2
MAP3K4	sex-common	2
EPS15	sex-common	2
HSD17B14	sex-common	2
UIMC1	sex-common	2
ALG6	sex-common	2
KDM2B	sex-common	2
EXOC1	sex-common	2
OSBPL8	sex-common	2
WDR7	sex-common	2
ZFHX4	sex-common	2
PSME1	sex-common	2
TRPM7	sex-common	2
TMEM38B	sex-common	2
EFHC1	sex-common	2
IFT74	sex-common	2
HPS4	sex-common	2
PIK3IP1	sex-common	2
COCH	sex-common	2
ISM1	sex-common	2
POLI	sex-common	2
NKAP	sex-common	2
STAG2	sex-common	2
BMX	sex-common	2
EEA1	sex-common	2
KLF8	sex-common	2
SUPT20H	sex-common	2
SGK3	sex-common	2
CPQ	sex-common	2
NIPAL2	sex-common	2
LIN7B	sex-common	2
VRK3	sex-common	2
AVL9	sex-common	2
PTN	sex-common	2
TTC26	sex-common	2
HOXA6	sex-common	2
CPED1	sex-common	2
GLCCI1	sex-common	2
PHF14	sex-common	2
AEBP1	sex-common	2
KDM4C	sex-common	2
MAPK8	sex-common	2
EBF3	sex-common	2
ASPA	sex-common	2
CDK5RAP3	sex-common	2
EZH1	sex-common	2
ABCC3	sex-common	2
AADAT	sex-common	2
GALNT7	sex-common	2
TBC1D19	sex-common	2
FAM149A	sex-common	2
KMT5B	sex-common	2
CEP164	sex-common	2
MADD	sex-common	2
MAGOHB	sex-common	2
PARP11	sex-common	2
CREBL2	sex-common	2
CDKN1B	sex-common	2
SCNN1A	sex-common	2
MGP	sex-common	2
SLC38A1	sex-common	2
MDM1	sex-common	2
C2CD5	sex-common	2
FANCE	sex-common	2
SAYSD1	sex-common	2
FBXL4	sex-common	2
ASCC3	sex-common	2
ADGRG6	sex-common	2
PHF1	sex-common	2
SMOC2	sex-common	2
BICRAL	sex-common	2
TMEM30A	sex-common	2
TBX18	sex-common	2
BRD8	sex-common	2
PCDHB7	sex-common	2
DROSHA	sex-common	2
NPR3	sex-common	2
GNPDA1	sex-common	2
ARL6	sex-common	2
CEP70	sex-common	2
ACAP2	sex-common	2
FOXP1	sex-common	2
NEK4	sex-common	2
KANSL3	sex-common	2
LMAN2L	sex-common	2
PDE1A	sex-common	2
PCGF1	sex-common	2
EFEMP1	sex-common	2
PAPOLG	sex-common	2
EHBP1	sex-common	2
UXS1	sex-common	2
DCAF17	sex-common	2
ORC4	sex-common	2
C2orf42	sex-common	2
PARD3B	sex-common	2
STXBP3	sex-common	2
LEPR	sex-common	2
TMEM9	sex-common	2
WARS2	sex-common	2
MTR	sex-common	2
PRPF3	sex-common	2
PTBP2	sex-common	2
RCOR3	sex-common	2
KMT2A	sex-common	2
NRP2	sex-common	2
UBE2B	sex-common	2
CNTRL	sex-common	2
INVS	sex-common	2
GALNT12	sex-common	2
KDSR	sex-common	2
LTBP2	sex-common	2
MLH3	sex-common	2
YIPF4	sex-common	2
SLC17A5	sex-common	2
PPP1R3C	sex-common	2
PCDHB14	sex-common	2
EXOSC8	sex-common	2
NR2C1	sex-common	2
PPP3CC	sex-common	2
SCPEP1	sex-common	2
SPOP	sex-common	2
TRIM6	sex-common	2
TRMT1L	sex-common	2
POLK	sex-common	2
UBL3	sex-common	2
SEPTIN7	sex-common	2
HERPUD2	sex-common	2
FKBP9	sex-common	2
RBM19	sex-common	2
SSPN	sex-common	2
EBPL	sex-common	2
ATF1	sex-common	2
TTC21B	sex-common	2
DEK	sex-common	2
MT1G	sex-common	2
UPF3B	sex-common	2
ATG4C	sex-common	2
NAPB	sex-common	2
ZNF133	sex-common	2
HP1BP3	sex-common	2
STYXL1	sex-common	2
PEX1	sex-common	2
ZNF780B	sex-common	2
SDF2L1	sex-common	2
MTX2	sex-common	2
SNRPN	sex-common	2
ARHGAP22	sex-common	2
DUT	sex-common	2
VPS13C	sex-common	2
KLK8	sex-common	2
GALNT8	sex-common	2
CDC16	sex-common	2
SNX9	sex-common	2
GATA5	sex-common	2
EDA2R	sex-common	2
ZNF227	sex-common	2
SH3BGRL	sex-common	2
ABCB7	sex-common	2
TBC1D5	sex-common	2
CAPN7	sex-common	2
SPATA6	sex-common	2
TRIM5	sex-common	2
TRIM22	sex-common	2
SLC14A2	sex-common	2
SPART	sex-common	2
MED6	sex-common	2
KIDINS220	sex-common	2
CDC73	sex-common	2
RELCH	sex-common	2
RERG	sex-common	2
DDB2	sex-common	2
ELP2	sex-common	2
SLC43A3	sex-common	2
GOLM1	sex-common	2
SRPK2	sex-common	2
CEP162	sex-common	2
PAN2	sex-common	2
REPS1	sex-common	2
WASHC4	sex-common	2
VILL	sex-common	2
RCBTB2	sex-common	2
SCRN1	sex-common	2
KAT7	sex-common	2
MARCHF7	sex-common	2
STAM	sex-common	2
ABI1	sex-common	2
STX17	sex-common	2
SPAG8	sex-common	2
GMPR	sex-common	2
CPEB2	sex-common	2
NEK1	sex-common	2
ZNF280D	sex-common	2
GIPC2	sex-common	2
SMARCAL1	sex-common	2
SENP7	sex-common	2
HERC3	sex-common	2
BBS7	sex-common	2
KIAA1109	sex-common	2
PDE5A	sex-common	2
PRDM5	sex-common	2
CCNG2	sex-common	2
GABARAPL1	sex-common	2
NEDD1	sex-common	2
RB1	sex-common	2
MBNL2	sex-common	2
FBLN5	sex-common	2
CDAN1	sex-common	2
BBS4	sex-common	2
CELF6	sex-common	2
FTO	sex-common	2
TOM1L1	sex-common	2
SPATA22	sex-common	2
ESCO1	sex-common	2
NBPF3	sex-common	2
INTS3	sex-common	2
C1orf35	sex-common	2
HNRNPLL	sex-common	2
MEIS1	sex-common	2
SPOPL	sex-common	2
KANSL1L	sex-common	2
COPS7B	sex-common	2
BOC	sex-common	2
ALDH1L1	sex-common	2
METTL14	sex-common	2
CYP4V2	sex-common	2
SSBP2	sex-common	2
GIN1	sex-common	2
COMMD10	sex-common	2
ATG12	sex-common	2
BOD1	sex-common	2
CDKAL1	sex-common	2
FAM193B	sex-common	2
IRAK1BP1	sex-common	2
PHIP	sex-common	2
SHPRH	sex-common	2
TIAM2	sex-common	2
ZNF182	sex-common	2
KRBOX4	sex-common	2
PLPP5	sex-common	2
NSD3	sex-common	2
TERF1	sex-common	2
ZNF462	sex-common	2
FRA10AC1	sex-common	2
PAMR1	sex-common	2
TTC12	sex-common	2
SLX4IP	sex-common	2
GPM6A	sex-common	2
CRIM1	sex-common	2
NEK7	sex-common	2
VIPAS39	sex-common	2
UPF2	sex-common	2
ANKAR	sex-common	2
SERP2	sex-common	2
CENPJ	sex-common	2
SETBP1	sex-common	2
EPG5	sex-common	2
CWF19L2	sex-common	2
PLEKHH2	sex-common	2
GGPS1	sex-common	2
MED21	sex-common	2
SLC25A27	sex-common	2
C16orf89	sex-common	2
ANGPT1	sex-common	2
PGM5	sex-common	2
ACSS1	sex-common	2
CYP2U1	sex-common	2
PIP4P2	sex-common	2
USP25	sex-common	2
GRAMD2B	sex-common	2
MICU3	sex-common	2
CFAP70	sex-common	2
DCK	sex-common	2
DPY19L4	sex-common	2
CXCL13	sex-common	2
NPTN	sex-common	2
KAT6B	sex-common	2
NSMCE2	sex-common	2
NMNAT2	sex-common	2
CLDN12	sex-common	2
GATAD1	sex-common	2
CACNA2D3	sex-common	2
ZNF618	sex-common	2
TNFRSF14	sex-common	2
KRTCAP3	sex-common	2
DZIP1L	sex-common	2
TSPAN33	sex-common	2
CDC42SE2	sex-common	2
RAPGEF6	sex-common	2
SYNJ1	sex-common	2
PAXBP1	sex-common	2
GPBP1L1	sex-common	2
ZNF235	sex-common	2
TMEM234	sex-common	2
BSDC1	sex-common	2
ZNF761	sex-common	2
CHTOP	sex-common	2
FDXR	sex-common	2
CYGB	sex-common	2
SCIMP	sex-common	2
ZSWIM5	sex-common	2
MEGF6	sex-common	2
DNAJB4	sex-common	2
ATXN7L2	sex-common	2
GBP4	sex-common	2
DDR2	sex-common	2
PPP1R21	sex-common	2
ANKRD23	sex-common	2
HELQ	sex-common	2
CGGBP1	sex-common	2
CWC22	sex-common	2
AZI2	sex-common	2
ANKZF1	sex-common	2
TRAT1	sex-common	2
PYHIN1	sex-common	2
ABHD6	sex-common	2
TTC14	sex-common	2
SNRK	sex-common	2
ZNF148	sex-common	2
MFSD8	sex-common	2
HMGB2	sex-common	2
SAP30	sex-common	2
PRIMPOL	sex-common	2
ANKRA2	sex-common	2
TLR3	sex-common	2
KLKB1	sex-common	2
SLC35A1	sex-common	2
STXBP5	sex-common	2
INTS8	sex-common	2
FREM1	sex-common	2
SNAPC3	sex-common	2
ALDH1A1	sex-common	2
KDM1B	sex-common	2
SVEP1	sex-common	2
PGAP4	sex-common	2
VEGFD	sex-common	2
ARHGAP12	sex-common	2
MARCHF8	sex-common	2
FAAH2	sex-common	2
TSC1	sex-common	2
R3HCC1L	sex-common	2
HTRA1	sex-common	2
RAB8B	sex-common	2
SPINT1	sex-common	2
POLL	sex-common	2
DPCD	sex-common	2
ZMAT1	sex-common	2
BMERB1	sex-common	2
MARF1	sex-common	2
CIAO2A	sex-common	2
FAM111A	sex-common	2
PIP4K2C	sex-common	2
AKTIP	sex-common	2
MARS1	sex-common	2
PBX3	sex-common	2
HDHD2	sex-common	2
GPT	sex-common	2
LTBP3	sex-common	2
ANKS3	sex-common	2
LMBRD1	sex-common	2
IRF2	sex-common	2
COG7	sex-common	2
CDC40	sex-common	2
TRAPPC11	sex-common	2
CNNM3	sex-common	2
CEP120	sex-common	2
JMJD7-PLA2G4B	sex-common	2
UPF3A	sex-common	2
PTPN9	sex-common	2
PLEKHA2	sex-common	2
METTL15	sex-common	2
TAPT1	sex-common	2
SLN	sex-common	2
FOXN2	sex-common	2
PPM1D	sex-common	2
FEZ2	sex-common	2
MTM1	sex-common	2
CLSTN1	sex-common	2
ATF7IP	sex-common	2
ZNF540	sex-common	2
NEGR1	sex-common	2
AGAP5	sex-common	2
ZMAT3	sex-common	2
SP3	sex-common	2
TNKS	sex-common	2
GLIPR1L1	sex-common	2
GOLIM4	sex-common	2
SLC25A30	sex-common	2
RALGAPA1	sex-common	2
DENND6A	sex-common	2
GOLGA8A	sex-common	2
ZNF25	sex-common	2
CCDC14	sex-common	2
ZNF135	sex-common	2
FIBIN	sex-common	2
THAP5	sex-common	2
ZNF518A	sex-common	2
DMAP1	sex-common	2
POGLUT3	sex-common	2
ZNF354B	sex-common	2
SHISA3	sex-common	2
EPM2AIP1	sex-common	2
NSUN3	sex-common	2
KCTD12	sex-common	2
CCDC66	sex-common	2
CAPS2	sex-common	2
CMTR2	sex-common	2
ADIPOQ	sex-common	2
TLCD5	sex-common	2
ZNF875	sex-common	2
AMIGO1	sex-common	2
CCDC149	sex-common	2
UBA7	sex-common	2
HOXB4	sex-common	2
C12orf60	sex-common	2
GAS6	sex-common	2
LHFPL6	sex-common	2
RBM12B	sex-common	2
MAML2	sex-common	2
APOBR	sex-common	2
PURA	sex-common	2
TARS3	sex-common	2
LMLN	sex-common	2
IKZF1	sex-common	2
IFITM1	sex-common	2
LRCH3	sex-common	2
WWOX	sex-common	2
SPIN2B	sex-common	2
ZDHHC17	sex-common	2
MITF	sex-common	2
EPOR	sex-common	2
ZC3H6	sex-common	2
AGAP4	sex-common	2
ENO4	sex-common	2
ZNF559	sex-common	2
CHM	sex-common	2
CCDC9B	sex-common	2
NBR1	sex-common	2
GOLGA8M	sex-common	2
RHCE	sex-common	2
APOD	sex-common	2
ZKSCAN3	sex-common	2
LIN54	sex-common	2
HLA-DRB1	sex-common	2
ZNF250	sex-common	2
GDAP2	sex-common	2
STRN3	sex-common	2
AC008758.1	sex-common	2
KPNA5	sex-common	2
ZNF585A	sex-common	2
ANXA4	sex-common	2
WDR5B	sex-common	2
ZSCAN26	sex-common	2
CCDC154	sex-common	2
FAR1	sex-common	2
ZNF841	sex-common	2
PDCD1LG2	sex-common	2
RPE	sex-common	2
ZNF81	sex-common	2
ZNF248	sex-common	2
MIER1	sex-common	2
HELZ	sex-common	2
ITSN2	sex-common	2
OGA	sex-common	2
MT1F	sex-common	2
HLA-DRB5	sex-common	2
ITGBL1	sex-common	2
TLK1	sex-common	2
TTC37	sex-common	2
LRIG2	sex-common	2
SFMBT2	sex-common	2
DZIP3	sex-common	2
DMD	sex-common	2
PJA2	sex-common	2
EFCAB7	sex-common	2
CHIC1	sex-common	2
HLA-DRA	sex-common	2
AADACL4	sex-common	2
PCDHA7	sex-common	2
PCDHA5	sex-common	2
PCDHA2	sex-common	2
PCDHA1	sex-common	2
PDE7A	sex-common	2
MT1M	sex-common	2
LCMT1	sex-common	2
CRYZL1	sex-common	2
CEP43	sex-common	2
AL049697.1	sex-common	2
PRCD	sex-common	2
AC124312.1	sex-common	2
COLCA2	sex-common	2
GOLGA8B	sex-common	2
FNIP1	sex-common	2
UMAD1	sex-common	2
HLA-DPB1	sex-common	2
NPIPA3	sex-common	2
SAPCD1	sex-common	2
HLA-DPA1	sex-common	2
HLA-DQB2	sex-common	2
PPP1R3E	sex-common	2
C4orf51	sex-common	2
FAM200B	sex-common	2
UPK3B	sex-common	2
PLA2G4B	sex-common	2
N4BP2L2	sex-common	2
HAUS5	sex-common	2
ZNF564	sex-common	2
TMEM200B	sex-common	2
AP000781.2	sex-common	2
PCDHA3	sex-common	2
CTSO	sex-common	2
ZNF432	sex-common	2
LINC02210-CRHR1	sex-common	2
FXYD1	sex-common	2
AC010422.6	sex-common	2
AC011473.4	sex-common	2
ZNF559-ZNF177	sex-common	2
TSNAX-DISC1	sex-common	2
PCDHB16	sex-common	2
AC009690.3	sex-common	2
SNURF	sex-common	2
AC008695.1	sex-common	2
CCL15-CCL14	sex-common	2
AL021997.2	sex-common	2
CCL14	sex-common	2
AC013394.1	sex-common	2
AC244517.10	sex-common	2
MYOCOS	sex-common	2
CCDC39	sex-common	2
AC097634.4	sex-common	2
AC098582.1	sex-common	2
AC005192.1	sex-common	2
GGCT	sex-biased (female)	2
RUNX3	sex-biased (female)	2
MYOC	sex-biased (female)	2
ZFY	sex-biased (female)	2
PYGM	sex-biased (female)	2
ACACB	sex-biased (female)	2
HOXA9	sex-biased (female)	2
FYB1	sex-biased (female)	2
HBQ1	sex-biased (female)	2
FAM83D	sex-biased (female)	2
MMP15	sex-biased (female)	2
NDRG4	sex-biased (female)	2
RETN	sex-biased (female)	2
MYH14	sex-biased (female)	2
PTP4A1	sex-biased (female)	2
MDFI	sex-biased (female)	2
APBB3	sex-biased (female)	2
WNT6	sex-biased (female)	2
WLS	sex-biased (female)	2
G0S2	sex-biased (female)	2
FGFRL1	sex-biased (female)	2
VIL1	sex-biased (female)	2
GDF15	sex-biased (female)	2
ASS1	sex-biased (female)	2
LGALS12	sex-biased (female)	2
GSTT2B	sex-biased (female)	2
ECHDC3	sex-biased (female)	2
C5AR2	sex-biased (female)	2
CTSL	sex-biased (female)	2
GLUL	sex-biased (female)	2
USP37	sex-biased (female)	2
CENPU	sex-biased (female)	2
GFRA1	sex-biased (female)	2
MCOLN2	sex-biased (female)	2
UCHL1	sex-biased (female)	2
ALOX15	sex-biased (female)	2
PTX3	sex-biased (female)	2
EBF1	sex-biased (female)	2
BMPER	sex-biased (female)	2
SLC29A4	sex-biased (female)	2
GPT2	sex-biased (female)	2
AGPAT2	sex-biased (female)	2
ALCAM	sex-biased (female)	2
SLC30A1	sex-biased (female)	2
SCUBE2	sex-biased (female)	2
CDC42EP4	sex-biased (female)	2
ZBTB42	sex-biased (female)	2
ITLN1	sex-biased (female)	2
PCP4	sex-biased (female)	2
ARHGEF37	sex-biased (female)	2
SH2D1A	sex-biased (female)	2
RTN4RL1	sex-biased (female)	2
MTARC1	sex-biased (female)	2
MT1X	sex-biased (female)	2
LRRK2	sex-biased (female)	2
VEPH1	sex-biased (female)	2
HLA-DOA	sex-biased (female)	2
PPP1CB	sex-biased (female)	2
HLA-DQA2	sex-biased (female)	2
AC004080.3	sex-biased (female)	2
MYMX	sex-biased (female)	2
RASL10B	sex-biased (female)	2
AC104304.2	sex-biased (female)	2
AL135905.2	sex-biased (female)	2
TSPAN6	sex-biased (male)	2
DPM1	sex-biased (male)	2
SCYL3	sex-biased (male)	2
C1orf112	sex-biased (male)	2
CFH	sex-biased (male)	2
NFYA	sex-biased (male)	2
NIPAL3	sex-biased (male)	2
LAS1L	sex-biased (male)	2
ENPP4	sex-biased (male)	2
KRIT1	sex-biased (male)	2
RAD52	sex-biased (male)	2
BAD	sex-biased (male)	2
TMEM176A	sex-biased (male)	2
CYP26B1	sex-biased (male)	2
ICA1	sex-biased (male)	2
ALS2	sex-biased (male)	2
CASP10	sex-biased (male)	2
TFPI	sex-biased (male)	2
NDUFAF7	sex-biased (male)	2
MTMR7	sex-biased (male)	2
SARM1	sex-biased (male)	2
FKBP4	sex-biased (male)	2
KDM1A	sex-biased (male)	2
RBM6	sex-biased (male)	2
CAMKK1	sex-biased (male)	2
RECQL	sex-biased (male)	2
ARHGAP33	sex-biased (male)	2
PDK4	sex-biased (male)	2
SLC25A13	sex-biased (male)	2
ST7	sex-biased (male)	2
SKAP2	sex-biased (male)	2
MCUB	sex-biased (male)	2
THSD7A	sex-biased (male)	2
LIG3	sex-biased (male)	2
RPAP3	sex-biased (male)	2
SPPL2B	sex-biased (male)	2
COPZ2	sex-biased (male)	2
CREBBP	sex-biased (male)	2
TSPOAP1	sex-biased (male)	2
GCFC2	sex-biased (male)	2
WDR54	sex-biased (male)	2
IBTK	sex-biased (male)	2
FBXL3	sex-biased (male)	2
ITGAL	sex-biased (male)	2
ITGA3	sex-biased (male)	2
ZFX	sex-biased (male)	2
LAMP2	sex-biased (male)	2
REX1BD	sex-biased (male)	2
OSBPL7	sex-biased (male)	2
TMEM98	sex-biased (male)	2
TMEM132A	sex-biased (male)	2
AP2B1	sex-biased (male)	2
SPATA20	sex-biased (male)	2
TNFRSF12A	sex-biased (male)	2
RALA	sex-biased (male)	2
BAIAP2L1	sex-biased (male)	2
ETV1	sex-biased (male)	2
AGK	sex-biased (male)	2
ALDH3B1	sex-biased (male)	2
PHTF2	sex-biased (male)	2
FARP2	sex-biased (male)	2
DBF4	sex-biased (male)	2
ARHGAP44	sex-biased (male)	2
CDKL3	sex-biased (male)	2
MARK4	sex-biased (male)	2
CCDC124	sex-biased (male)	2
PAFAH1B1	sex-biased (male)	2
TRAPPC6A	sex-biased (male)	2
SCN4A	sex-biased (male)	2
ST7L	sex-biased (male)	2
RHBDF1	sex-biased (male)	2
LUC7L	sex-biased (male)	2
CRAMP1	sex-biased (male)	2
TEAD3	sex-biased (male)	2
SELE	sex-biased (male)	2
MYLIP	sex-biased (male)	2
PSMB1	sex-biased (male)	2
CDK11A	sex-biased (male)	2
DLEC1	sex-biased (male)	2
CYTH3	sex-biased (male)	2
SYPL1	sex-biased (male)	2
CYB561	sex-biased (male)	2
SS18L2	sex-biased (male)	2
IL32	sex-biased (male)	2
MED24	sex-biased (male)	2
HEATR5B	sex-biased (male)	2
SEC62	sex-biased (male)	2
RPS20	sex-biased (male)	2
REV3L	sex-biased (male)	2
POMT2	sex-biased (male)	2
VTA1	sex-biased (male)	2
ZNF207	sex-biased (male)	2
CD9	sex-biased (male)	2
IFFO1	sex-biased (male)	2
PHF7	sex-biased (male)	2
NISCH	sex-biased (male)	2
STAB1	sex-biased (male)	2
FUZ	sex-biased (male)	2
IDS	sex-biased (male)	2
CD4	sex-biased (male)	2
HFE	sex-biased (male)	2
SCMH1	sex-biased (male)	2
FYN	sex-biased (male)	2
CLCN6	sex-biased (male)	2
MRC2	sex-biased (male)	2
TSPAN9	sex-biased (male)	2
APBA3	sex-biased (male)	2
ANOS1	sex-biased (male)	2
AKAP8L	sex-biased (male)	2
UTP18	sex-biased (male)	2
RNF216	sex-biased (male)	2
TTC19	sex-biased (male)	2
LARS2	sex-biased (male)	2
PLAUR	sex-biased (male)	2
DCN	sex-biased (male)	2
PPP5C	sex-biased (male)	2
CEP68	sex-biased (male)	2
TMEM159	sex-biased (male)	2
ERCC1	sex-biased (male)	2
SEMA3B	sex-biased (male)	2
MBTPS2	sex-biased (male)	2
PRICKLE3	sex-biased (male)	2
KDM5D	sex-biased (male)	2
CALCOCO1	sex-biased (male)	2
MAP4K5	sex-biased (male)	2
CLDN11	sex-biased (male)	2
MVP	sex-biased (male)	2
NUB1	sex-biased (male)	2
RWDD2A	sex-biased (male)	2
CLK1	sex-biased (male)	2
POLR3B	sex-biased (male)	2
ANGEL1	sex-biased (male)	2
DDX11	sex-biased (male)	2
HEBP1	sex-biased (male)	2
UFL1	sex-biased (male)	2
POLA2	sex-biased (male)	2
CAPN1	sex-biased (male)	2
SLC30A9	sex-biased (male)	2
MTMR11	sex-biased (male)	2
COX15	sex-biased (male)	2
CCDC88C	sex-biased (male)	2
YAF2	sex-biased (male)	2
ZMYND11	sex-biased (male)	2
MATR3	sex-biased (male)	2
XYLT2	sex-biased (male)	2
RGPD5	sex-biased (male)	2
NUDCD3	sex-biased (male)	2
ISL1	sex-biased (male)	2
GLT8D1	sex-biased (male)	2
ATP2C1	sex-biased (male)	2
SLC38A5	sex-biased (male)	2
RALBP1	sex-biased (male)	2
WWTR1	sex-biased (male)	2
AGPS	sex-biased (male)	2
TTC27	sex-biased (male)	2
ZNF582	sex-biased (male)	2
VSIG2	sex-biased (male)	2
CD74	sex-biased (male)	2
ZRANB1	sex-biased (male)	2
NCDN	sex-biased (male)	2
ADGRA2	sex-biased (male)	2
ZFP64	sex-biased (male)	2
MNAT1	sex-biased (male)	2
MRE11	sex-biased (male)	2
SPAST	sex-biased (male)	2
OSBPL5	sex-biased (male)	2
AQR	sex-biased (male)	2
SLC45A4	sex-biased (male)	2
RNF10	sex-biased (male)	2
ZNF839	sex-biased (male)	2
ZDHHC6	sex-biased (male)	2
RNH1	sex-biased (male)	2
RB1CC1	sex-biased (male)	2
ERP44	sex-biased (male)	2
AKAP11	sex-biased (male)	2
GLRX2	sex-biased (male)	2
SNAPC1	sex-biased (male)	2
DERA	sex-biased (male)	2
UBR2	sex-biased (male)	2
CCDC28A	sex-biased (male)	2
HSF2	sex-biased (male)	2
NR1H3	sex-biased (male)	2
TOMM34	sex-biased (male)	2
SEC63	sex-biased (male)	2
KPNA6	sex-biased (male)	2
FAS	sex-biased (male)	2
RNASET2	sex-biased (male)	2
BTN3A1	sex-biased (male)	2
MIPEP	sex-biased (male)	2
PRKCH	sex-biased (male)	2
TBPL1	sex-biased (male)	2
BCLAF1	sex-biased (male)	2
TFB1M	sex-biased (male)	2
NUP160	sex-biased (male)	2
CENPQ	sex-biased (male)	2
RANBP3	sex-biased (male)	2
ARID4A	sex-biased (male)	2
PNPLA6	sex-biased (male)	2
IFT88	sex-biased (male)	2
ALG1	sex-biased (male)	2
FUT8	sex-biased (male)	2
UBA6	sex-biased (male)	2
ATP6V0A1	sex-biased (male)	2
PIAS1	sex-biased (male)	2
SLC4A7	sex-biased (male)	2
ASTE1	sex-biased (male)	2
RNF19A	sex-biased (male)	2
PEX3	sex-biased (male)	2
GABARAPL2	sex-biased (male)	2
SH3YL1	sex-biased (male)	2
DAPK2	sex-biased (male)	2
ADSS2	sex-biased (male)	2
TIMP2	sex-biased (male)	2
RFC1	sex-biased (male)	2
TBC1D23	sex-biased (male)	2
TUBG2	sex-biased (male)	2
FLT4	sex-biased (male)	2
MFAP3	sex-biased (male)	2
MRI1	sex-biased (male)	2
AGA	sex-biased (male)	2
PI4K2B	sex-biased (male)	2
BOD1L1	sex-biased (male)	2
MAT2B	sex-biased (male)	2
TLL1	sex-biased (male)	2
CLEC16A	sex-biased (male)	2
MTREX	sex-biased (male)	2
ZFYVE16	sex-biased (male)	2
C6	sex-biased (male)	2
RAI14	sex-biased (male)	2
PNKP	sex-biased (male)	2
PHLPP2	sex-biased (male)	2
STAU2	sex-biased (male)	2
CTNS	sex-biased (male)	2
INPP4A	sex-biased (male)	2
PARP3	sex-biased (male)	2
THAP3	sex-biased (male)	2
RIPOR3	sex-biased (male)	2
TDP1	sex-biased (male)	2
SPATA7	sex-biased (male)	2
MED17	sex-biased (male)	2
ADAM28	sex-biased (male)	2
JADE2	sex-biased (male)	2
TRIT1	sex-biased (male)	2
CUL7	sex-biased (male)	2
PHKA2	sex-biased (male)	2
CNTLN	sex-biased (male)	2
EPHA3	sex-biased (male)	2
HSPA5	sex-biased (male)	2
DSG2	sex-biased (male)	2
GEMIN8	sex-biased (male)	2
PREX2	sex-biased (male)	2
YTHDC2	sex-biased (male)	2
CTPS2	sex-biased (male)	2
ATP6V1H	sex-biased (male)	2
POLR2B	sex-biased (male)	2
FAM214A	sex-biased (male)	2
ARAP2	sex-biased (male)	2
CP	sex-biased (male)	2
KATNIP	sex-biased (male)	2
DTNBP1	sex-biased (male)	2
ANO2	sex-biased (male)	2
ARHGAP6	sex-biased (male)	2
FAM184B	sex-biased (male)	2
GOPC	sex-biased (male)	2
HDAC9	sex-biased (male)	2
VPS13D	sex-biased (male)	2
R3HDM1	sex-biased (male)	2
PER3	sex-biased (male)	2
UTS2	sex-biased (male)	2
ELN	sex-biased (male)	2
ARID1B	sex-biased (male)	2
PPP1R3F	sex-biased (male)	2
HEXB	sex-biased (male)	2
JKAMP	sex-biased (male)	2
DKK3	sex-biased (male)	2
ARHGEF5	sex-biased (male)	2
LETMD1	sex-biased (male)	2
MAPK9	sex-biased (male)	2
COL23A1	sex-biased (male)	2
FAM160A2	sex-biased (male)	2
HERPUD1	sex-biased (male)	2
HOMER3	sex-biased (male)	2
PIK3CB	sex-biased (male)	2
THOC3	sex-biased (male)	2
MPHOSPH9	sex-biased (male)	2
PLEKHA5	sex-biased (male)	2
SIKE1	sex-biased (male)	2
TTC17	sex-biased (male)	2
METTL24	sex-biased (male)	2
LAMA3	sex-biased (male)	2
AP5M1	sex-biased (male)	2
ANAPC4	sex-biased (male)	2
KCNQ1	sex-biased (male)	2
PHPT1	sex-biased (male)	2
ARID4B	sex-biased (male)	2
SDCCAG8	sex-biased (male)	2
TBC1D22A	sex-biased (male)	2
SYNE2	sex-biased (male)	2
FAM114A2	sex-biased (male)	2
CYFIP2	sex-biased (male)	2
GINM1	sex-biased (male)	2
EIF2AK2	sex-biased (male)	2
KMT2C	sex-biased (male)	2
MCOLN3	sex-biased (male)	2
CCDC85A	sex-biased (male)	2
PUM2	sex-biased (male)	2
MRPL43	sex-biased (male)	2
HPF1	sex-biased (male)	2
ZFR	sex-biased (male)	2
ZNF280C	sex-biased (male)	2
TRAF1	sex-biased (male)	2
RC3H2	sex-biased (male)	2
IL17RB	sex-biased (male)	2
TRAF3IP2	sex-biased (male)	2
DCBLD2	sex-biased (male)	2
PKP2	sex-biased (male)	2
PRDM1	sex-biased (male)	2
TMCC3	sex-biased (male)	2
MTA3	sex-biased (male)	2
USP13	sex-biased (male)	2
ATP11B	sex-biased (male)	2
CDK14	sex-biased (male)	2
PPP1R12A	sex-biased (male)	2
POLR3E	sex-biased (male)	2
ZC3H11A	sex-biased (male)	2
YIPF1	sex-biased (male)	2
FLYWCH1	sex-biased (male)	2
UNKL	sex-biased (male)	2
PARP12	sex-biased (male)	2
ALDH18A1	sex-biased (male)	2
CDK17	sex-biased (male)	2
SLC2A3	sex-biased (male)	2
PSD	sex-biased (male)	2
CCAR1	sex-biased (male)	2
OGFR	sex-biased (male)	2
PTPRU	sex-biased (male)	2
SNRNP40	sex-biased (male)	2
QSER1	sex-biased (male)	2
ACAA1	sex-biased (male)	2
BCAT1	sex-biased (male)	2
HDAC7	sex-biased (male)	2
NCKAP1	sex-biased (male)	2
SFSWAP	sex-biased (male)	2
MON2	sex-biased (male)	2
CDH3	sex-biased (male)	2
DGAT2	sex-biased (male)	2
ZNF112	sex-biased (male)	2
ELMO2	sex-biased (male)	2
APPBP2	sex-biased (male)	2
BICRA	sex-biased (male)	2
RPL18	sex-biased (male)	2
CA11	sex-biased (male)	2
U2AF2	sex-biased (male)	2
MTMR1	sex-biased (male)	2
ADCK1	sex-biased (male)	2
RNF4	sex-biased (male)	2
LIMCH1	sex-biased (male)	2
TM7SF3	sex-biased (male)	2
TSPAN32	sex-biased (male)	2
CCN5	sex-biased (male)	2
ST3GAL6	sex-biased (male)	2
NGFR	sex-biased (male)	2
CDON	sex-biased (male)	2
TAF2	sex-biased (male)	2
TNPO3	sex-biased (male)	2
BORCS8-MEF2B	sex-biased (male)	2
RFXANK	sex-biased (male)	2
TMEM161A	sex-biased (male)	2
SUGP2	sex-biased (male)	2
SLC12A2	sex-biased (male)	2
SNX24	sex-biased (male)	2
SNCAIP	sex-biased (male)	2
FAR2	sex-biased (male)	2
HMG20B	sex-biased (male)	2
TAF11	sex-biased (male)	2
ANKS1A	sex-biased (male)	2
ZNF76	sex-biased (male)	2
UHRF1BP1	sex-biased (male)	2
OAT	sex-biased (male)	2
TRAM2	sex-biased (male)	2
DGKA	sex-biased (male)	2
PDIA5	sex-biased (male)	2
TBC1D22B	sex-biased (male)	2
NDUFB4	sex-biased (male)	2
ZC3H15	sex-biased (male)	2
MAP2K4	sex-biased (male)	2
PACC1	sex-biased (male)	2
CYB5R4	sex-biased (male)	2
SEC61A2	sex-biased (male)	2
TLE2	sex-biased (male)	2
CDK13	sex-biased (male)	2
FOXJ2	sex-biased (male)	2
ELAVL1	sex-biased (male)	2
TIE1	sex-biased (male)	2
DIP2B	sex-biased (male)	2
KDM4A	sex-biased (male)	2
NFYC	sex-biased (male)	2
SLC9A3	sex-biased (male)	2
POLR1H	sex-biased (male)	2
CLDN18	sex-biased (male)	2
GOLGA5	sex-biased (male)	2
LRRC40	sex-biased (male)	2
EML1	sex-biased (male)	2
TRMT11	sex-biased (male)	2
ATG2B	sex-biased (male)	2
ARFGEF1	sex-biased (male)	2
ZFAT	sex-biased (male)	2
STAG3	sex-biased (male)	2
MYO9A	sex-biased (male)	2
SP100	sex-biased (male)	2
PLPP1	sex-biased (male)	2
NEO1	sex-biased (male)	2
TRAM1	sex-biased (male)	2
PHKA1	sex-biased (male)	2
CACNB1	sex-biased (male)	2
EVI5	sex-biased (male)	2
DHX29	sex-biased (male)	2
METTL22	sex-biased (male)	2
TP53BP1	sex-biased (male)	2
TRO	sex-biased (male)	2
PRKCZ	sex-biased (male)	2
SYT1	sex-biased (male)	2
NAV3	sex-biased (male)	2
ROGDI	sex-biased (male)	2
CBFB	sex-biased (male)	2
RASSF1	sex-biased (male)	2
IFI35	sex-biased (male)	2
HEATR6	sex-biased (male)	2
PLEKHH3	sex-biased (male)	2
MEF2A	sex-biased (male)	2
OTUD5	sex-biased (male)	2
TBC1D25	sex-biased (male)	2
GPKOW	sex-biased (male)	2
GRIPAP1	sex-biased (male)	2
FTSJ1	sex-biased (male)	2
REEP1	sex-biased (male)	2
LAPTM4A	sex-biased (male)	2
TTC7A	sex-biased (male)	2
IP6K2	sex-biased (male)	2
SRBD1	sex-biased (male)	2
KIF2A	sex-biased (male)	2
RASGRP2	sex-biased (male)	2
IFT80	sex-biased (male)	2
SIRT2	sex-biased (male)	2
ERLEC1	sex-biased (male)	2
PPP2R5B	sex-biased (male)	2
MAST4	sex-biased (male)	2
NUP133	sex-biased (male)	2
NUCKS1	sex-biased (male)	2
VPS35	sex-biased (male)	2
ABCC9	sex-biased (male)	2
CLEC2D	sex-biased (male)	2
FUNDC1	sex-biased (male)	2
RORA	sex-biased (male)	2
DRD4	sex-biased (male)	2
ATP1B3	sex-biased (male)	2
NEDD4	sex-biased (male)	2
PIGB	sex-biased (male)	2
GNB5	sex-biased (male)	2
UFD1	sex-biased (male)	2
LRP6	sex-biased (male)	2
PHRF1	sex-biased (male)	2
NUCB2	sex-biased (male)	2
PFN2	sex-biased (male)	2
FGF10	sex-biased (male)	2
EXOC5	sex-biased (male)	2
RNF126	sex-biased (male)	2
ZXDC	sex-biased (male)	2
POLB	sex-biased (male)	2
WIPI1	sex-biased (male)	2
GBA2	sex-biased (male)	2
ASNS	sex-biased (male)	2
AP3M2	sex-biased (male)	2
TESK2	sex-biased (male)	2
PTPN21	sex-biased (male)	2
TCOF1	sex-biased (male)	2
OSBPL3	sex-biased (male)	2
RAD18	sex-biased (male)	2
ATP2B1	sex-biased (male)	2
NCK2	sex-biased (male)	2
MAP4K4	sex-biased (male)	2
MGAT4A	sex-biased (male)	2
RPL31	sex-biased (male)	2
SNX13	sex-biased (male)	2
ARHGAP10	sex-biased (male)	2
ING3	sex-biased (male)	2
BUD23	sex-biased (male)	2
SEL1L	sex-biased (male)	2
TCF3	sex-biased (male)	2
TRIB2	sex-biased (male)	2
DAZAP1	sex-biased (male)	2
FAM50A	sex-biased (male)	2
FAM3A	sex-biased (male)	2
CPSF1	sex-biased (male)	2
CYBRD1	sex-biased (male)	2
RDH11	sex-biased (male)	2
ZFYVE26	sex-biased (male)	2
EPN2	sex-biased (male)	2
LIMS2	sex-biased (male)	2
SPEG	sex-biased (male)	2
LNX1	sex-biased (male)	2
ALDH3A2	sex-biased (male)	2
MPP5	sex-biased (male)	2
RHOBTB1	sex-biased (male)	2
CHFR	sex-biased (male)	2
NFATC3	sex-biased (male)	2
TRNT1	sex-biased (male)	2
FBXW11	sex-biased (male)	2
ACAP1	sex-biased (male)	2
CRMP1	sex-biased (male)	2
EVC	sex-biased (male)	2
DERL2	sex-biased (male)	2
IRAG1	sex-biased (male)	2
XRCC1	sex-biased (male)	2
SELENOO	sex-biased (male)	2
ALPK1	sex-biased (male)	2
LLGL2	sex-biased (male)	2
PDE8A	sex-biased (male)	2
SMARCE1	sex-biased (male)	2
KDM5A	sex-biased (male)	2
PPP2R3A	sex-biased (male)	2
IGF2BP2	sex-biased (male)	2
MAP3K13	sex-biased (male)	2
ST6GAL1	sex-biased (male)	2
FRY	sex-biased (male)	2
PICALM	sex-biased (male)	2
CLNS1A	sex-biased (male)	2
TSG101	sex-biased (male)	2
NCBP3	sex-biased (male)	2
CA12	sex-biased (male)	2
NTN4	sex-biased (male)	2
BCS1L	sex-biased (male)	2
DPP8	sex-biased (male)	2
ZNF532	sex-biased (male)	2
LMAN1	sex-biased (male)	2
HACD3	sex-biased (male)	2
MYDGF	sex-biased (male)	2
ANO8	sex-biased (male)	2
TUBE1	sex-biased (male)	2
ARHGEF10L	sex-biased (male)	2
TXK	sex-biased (male)	2
ACTR6	sex-biased (male)	2
TIPIN	sex-biased (male)	2
SRI	sex-biased (male)	2
EIF4G3	sex-biased (male)	2
NUP37	sex-biased (male)	2
SEMA3A	sex-biased (male)	2
SEMA3C	sex-biased (male)	2
ZNF638	sex-biased (male)	2
SLC25A40	sex-biased (male)	2
TIMM21	sex-biased (male)	2
ZNF37A	sex-biased (male)	2
MARK3	sex-biased (male)	2
FNDC3B	sex-biased (male)	2
FRYL	sex-biased (male)	2
TMEM131	sex-biased (male)	2
FSCN1	sex-biased (male)	2
PLD1	sex-biased (male)	2
DLG1	sex-biased (male)	2
SEC31B	sex-biased (male)	2
SART3	sex-biased (male)	2
ARHGAP15	sex-biased (male)	2
EXOSC7	sex-biased (male)	2
KIFAP3	sex-biased (male)	2
MKRN2	sex-biased (male)	2
REXO2	sex-biased (male)	2
RBMS2	sex-biased (male)	2
BAZ2A	sex-biased (male)	2
PTPN23	sex-biased (male)	2
MLH1	sex-biased (male)	2
KLHL20	sex-biased (male)	2
RGS11	sex-biased (male)	2
SLC46A1	sex-biased (male)	2
ANKRD13A	sex-biased (male)	2
TPD52	sex-biased (male)	2
PAG1	sex-biased (male)	2
MBNL3	sex-biased (male)	2
XAB2	sex-biased (male)	2
ARHGEF1	sex-biased (male)	2
MAP2K7	sex-biased (male)	2
CTTNBP2	sex-biased (male)	2
RARB	sex-biased (male)	2
TOP2B	sex-biased (male)	2
PPP1R12B	sex-biased (male)	2
DNAJC10	sex-biased (male)	2
GTF3C1	sex-biased (male)	2
USP33	sex-biased (male)	2
PAK3	sex-biased (male)	2
SNRPA	sex-biased (male)	2
EXOSC5	sex-biased (male)	2
DYNC1I2	sex-biased (male)	2
LRCH4	sex-biased (male)	2
FAM76B	sex-biased (male)	2
SIRT6	sex-biased (male)	2
POLD3	sex-biased (male)	2
CAPZB	sex-biased (male)	2
GPR137B	sex-biased (male)	2
SLC25A43	sex-biased (male)	2
FGFR1	sex-biased (male)	2
MAP2	sex-biased (male)	2
PIAS2	sex-biased (male)	2
AMPH	sex-biased (male)	2
FAP	sex-biased (male)	2
UBE2K	sex-biased (male)	2
PPP2R5C	sex-biased (male)	2
VDAC3	sex-biased (male)	2
TNRC6C	sex-biased (male)	2
ITCH	sex-biased (male)	2
RUNX1T1	sex-biased (male)	2
SLC1A3	sex-biased (male)	2
LXN	sex-biased (male)	2
SP140	sex-biased (male)	2
CDC14A	sex-biased (male)	2
RAPGEF3	sex-biased (male)	2
CEACAM1	sex-biased (male)	2
SENP1	sex-biased (male)	2
PAFAH1B3	sex-biased (male)	2
KIF22	sex-biased (male)	2
CARMIL1	sex-biased (male)	2
DNM2	sex-biased (male)	2
EPB41L2	sex-biased (male)	2
PTPRH	sex-biased (male)	2
SLC35C2	sex-biased (male)	2
RFX3	sex-biased (male)	2
RIF1	sex-biased (male)	2
SESN1	sex-biased (male)	2
MID2	sex-biased (male)	2
CNOT4	sex-biased (male)	2
CPOX	sex-biased (male)	2
CLDND1	sex-biased (male)	2
MOK	sex-biased (male)	2
HSP90AA1	sex-biased (male)	2
DLGAP4	sex-biased (male)	2
AP4E1	sex-biased (male)	2
RSBN1	sex-biased (male)	2
MAGI3	sex-biased (male)	2
CXCL2	sex-biased (male)	2
MEF2C	sex-biased (male)	2
PKP1	sex-biased (male)	2
UBA5	sex-biased (male)	2
STK17B	sex-biased (male)	2
ZNF510	sex-biased (male)	2
ZNF506	sex-biased (male)	2
DUSP12	sex-biased (male)	2
DELE1	sex-biased (male)	2
CADPS2	sex-biased (male)	2
PCDHGA2	sex-biased (male)	2
HSPB11	sex-biased (male)	2
SMARCD3	sex-biased (male)	2
WDR70	sex-biased (male)	2
C1QTNF3	sex-biased (male)	2
ME2	sex-biased (male)	2
C5orf22	sex-biased (male)	2
FAM135A	sex-biased (male)	2
EPB41L3	sex-biased (male)	2
COBLL1	sex-biased (male)	2
DLG3	sex-biased (male)	2
TRAF5	sex-biased (male)	2
MRPL22	sex-biased (male)	2
GSK3B	sex-biased (male)	2
ITGB5	sex-biased (male)	2
XPO1	sex-biased (male)	2
RNF13	sex-biased (male)	2
PALB2	sex-biased (male)	2
LYRM2	sex-biased (male)	2
KAT6A	sex-biased (male)	2
TUT7	sex-biased (male)	2
ULK2	sex-biased (male)	2
TNPO1	sex-biased (male)	2
PIBF1	sex-biased (male)	2
PDS5B	sex-biased (male)	2
RRAGB	sex-biased (male)	2
CYLD	sex-biased (male)	2
ZNF671	sex-biased (male)	2
ZNF586	sex-biased (male)	2
ZNF264	sex-biased (male)	2
RPS5	sex-biased (male)	2
YTHDC1	sex-biased (male)	2
PPIE	sex-biased (male)	2
ZMPSTE24	sex-biased (male)	2
GSTP1	sex-biased (male)	2
FAM234B	sex-biased (male)	2
COL16A1	sex-biased (male)	2
NCOA1	sex-biased (male)	2
AGBL5	sex-biased (male)	2
KIF3C	sex-biased (male)	2
MAPRE3	sex-biased (male)	2
CAD	sex-biased (male)	2
BCORL1	sex-biased (male)	2
ATRX	sex-biased (male)	2
MYNN	sex-biased (male)	2
MECOM	sex-biased (male)	2
SCAMP1	sex-biased (male)	2
HACE1	sex-biased (male)	2
WDR47	sex-biased (male)	2
WDFY1	sex-biased (male)	2
OVGP1	sex-biased (male)	2
SLC25A24	sex-biased (male)	2
PILRA	sex-biased (male)	2
IGSF9	sex-biased (male)	2
ZNF213	sex-biased (male)	2
CPNE3	sex-biased (male)	2
CTTN	sex-biased (male)	2
WNT11	sex-biased (male)	2
DDHD2	sex-biased (male)	2
MGST2	sex-biased (male)	2
ATG16L1	sex-biased (male)	2
USP40	sex-biased (male)	2
CHMP5	sex-biased (male)	2
NFX1	sex-biased (male)	2
DIMT1	sex-biased (male)	2
IPO11	sex-biased (male)	2
EIF2AK1	sex-biased (male)	2
EPDR1	sex-biased (male)	2
SNX10	sex-biased (male)	2
ITPKC	sex-biased (male)	2
TMED2	sex-biased (male)	2
ERO1B	sex-biased (male)	2
ZFAND6	sex-biased (male)	2
ZW10	sex-biased (male)	2
ALG9	sex-biased (male)	2
NOX4	sex-biased (male)	2
ACOX3	sex-biased (male)	2
MTMR2	sex-biased (male)	2
TRIP6	sex-biased (male)	2
SRRT	sex-biased (male)	2
BAX	sex-biased (male)	2
NLK	sex-biased (male)	2
ADAMTS2	sex-biased (male)	2
MMP2	sex-biased (male)	2
TXNDC16	sex-biased (male)	2
RTRAF	sex-biased (male)	2
NID2	sex-biased (male)	2
SF3B2	sex-biased (male)	2
ERGIC2	sex-biased (male)	2
PIR	sex-biased (male)	2
AAMDC	sex-biased (male)	2
CNOT3	sex-biased (male)	2
PTPN4	sex-biased (male)	2
ASAP3	sex-biased (male)	2
EDEM2	sex-biased (male)	2
PDRG1	sex-biased (male)	2
EPB41L1	sex-biased (male)	2
DOCK9	sex-biased (male)	2
ANKRD10	sex-biased (male)	2
TGDS	sex-biased (male)	2
COQ9	sex-biased (male)	2
ARHGAP28	sex-biased (male)	2
CRLS1	sex-biased (male)	2
ATRN	sex-biased (male)	2
SIGLEC1	sex-biased (male)	2
NSFL1C	sex-biased (male)	2
SLC4A11	sex-biased (male)	2
C20orf194	sex-biased (male)	2
ZNF343	sex-biased (male)	2
EBF4	sex-biased (male)	2
LZTS3	sex-biased (male)	2
KIZ	sex-biased (male)	2
DYNLL1	sex-biased (male)	2
SNX5	sex-biased (male)	2
MAPKAPK5	sex-biased (male)	2
P2RX7	sex-biased (male)	2
ESF1	sex-biased (male)	2
RBBP9	sex-biased (male)	2
ANAPC5	sex-biased (male)	2
SLC23A2	sex-biased (male)	2
TASP1	sex-biased (male)	2
RPLP0	sex-biased (male)	2
PXN	sex-biased (male)	2
KIF16B	sex-biased (male)	2
BRAP	sex-biased (male)	2
IGBP1	sex-biased (male)	2
FXYD5	sex-biased (male)	2
ZNF302	sex-biased (male)	2
CMTM1	sex-biased (male)	2
RBM41	sex-biased (male)	2
NECAP1	sex-biased (male)	2
ARHGAP4	sex-biased (male)	2
DHX32	sex-biased (male)	2
GPATCH2L	sex-biased (male)	2
LTBP4	sex-biased (male)	2
SPTLC1	sex-biased (male)	2
PAPOLA	sex-biased (male)	2
CCNK	sex-biased (male)	2
YPEL3	sex-biased (male)	2
NUDC	sex-biased (male)	2
MAEA	sex-biased (male)	2
ICAM1	sex-biased (male)	2
STRN4	sex-biased (male)	2
LYZ	sex-biased (male)	2
PDCD7	sex-biased (male)	2
SPG21	sex-biased (male)	2
[truncated: 73,739 more rows]

## Sheet: DASs
Table S3. Sex-stratified age-associated AS events
id	Class	tissue
A5SS@CWC25@chr17@-@38810468^38809765-@38810276^38809765-	sex-common	1
SE@DENND2B@chr11@-@8870954^8811335-@8870954^8839350-8839310^8831688-8831556^8811335-	sex-common	1
SE@ROGDI@chr16@-@4801503^4800578-@4801503^4801321-4801050^4800578-	sex-common	1
SE@ROGDI@chr16@-@4801503^4800578-@4801503^4801321-4801267^4800578-	sex-common	1
SE@ZNF263@chr16@+@3284205^3289393-@3284205^3285059-3285239^3285681-3285754^3286023-3286149^3288454-3288570^3289393-	sex-common	1
SE@ZNF263@chr16@+@3284205^3289393-@3284205^3288454-3288570^3289393-	sex-common	1
A3SS@ALG13@chrX@+@111681299^111682236-@111681299^111682132-	sex-biased (female)	1
A3SS@AP3D1@chr19@-@2113336^2112931-@2113336^2112967-	sex-biased (female)	1
A3SS@C11orf80@chr11@+@66828364^66838370-@66828364^66838367-	sex-biased (female)	1
A3SS@CYP4F12@chr19@+@15678329^15680278-@15678329^15680244-	sex-biased (female)	1
A3SS@CYP4F12@chr19@+@15678329^15680278-15680297^15680392-@15678329^15680244-	sex-biased (female)	1
A3SS@ECI2@chr6@-@4135511^4133701-@4135511^4133711-	sex-biased (female)	1
A3SS@EMC9@chr14@-@24140889^24139614-@24140889^24139789-	sex-biased (female)	1
A3SS@KDM6A@chrX@+@45061419^45063422-@45061419^45062647-	sex-biased (female)	1
A3SS@KHDC4@chr1@-@155917499^155916709-@155917499^155916737-	sex-biased (female)	1
A3SS@LETMD1@chr12@+@51049185^51053812-@51049185^51053778-	sex-biased (female)	1
A3SS@LILRB2@chr19@-@54277889^54277597-@54277889^54277600-	sex-biased (female)	1
A3SS@LILRB2@chr19@-@54277889^54277597-54277550^54276929-@54277889^54277600-	sex-biased (female)	1
A3SS@LRRC14@chr8@+@144518041^144519701-@144518041^144519615-	sex-biased (female)	1
A3SS@NVL@chr1@-@224326391^224317925-@224326391^224317930-	sex-biased (female)	1
A3SS@OSBPL8@chr12@-@76487510^76450979-@76487510^76450988-	sex-biased (female)	1
A3SS@PFAS@chr17@+@8266353^8266753-@8266353^8266501-	sex-biased (female)	1
A3SS@SPATA20@chr17@+@50547285^50547720-@50547285^50547665-	sex-biased (female)	1
A3SS@TAF1D@chr11@-@93734625^93733419-@93734625^93733505-	sex-biased (female)	1
A3SS@TMEM116@chr12@-@111933886^111932659-@111933886^111932731-	sex-biased (female)	1
A3SS@TRIM26@chr6@-@30201035^30199153-@30201035^30199264-	sex-biased (female)	1
A5SS@BOC@chr3@+@113216274^113249722-@113216278^113249722-	sex-biased (female)	1
A5SS@BTN3A2@chr6@+@26368050^26368565-@26368267^26368565-	sex-biased (female)	1
A5SS@CCDC66@chr3@+@56566740^56566950-@56566759^56566950-	sex-biased (female)	1
A5SS@CEP170@chr1@-@243186259^243172846-@243185779^243172846-	sex-biased (female)	1
A5SS@COP1@chr1@-@176163827^176162988-@176163815^176162988-	sex-biased (female)	1
A5SS@DMKN@chr19@-@35498716^35497538-@35498598^35497681-35497647^35497538-	sex-biased (female)	1
A5SS@ENTPD4@chr8@-@23441593^23439915-@23441569^23439915-	sex-biased (female)	1
A5SS@HM13@chr20@+@31538359^31544947-@31538554^31544947-	sex-biased (female)	1
A5SS@MLF1@chr3@+@158571347^158592434-@158571391^158588852-158588924^158592434-	sex-biased (female)	1
A5SS@MRPL55@chr1@-@228109261^228108318-@228109149^228109021-228108437^228108318-	sex-biased (female)	1
A5SS@MRPL55@chr1@-@228109261^228108318-@228109149^228109021-228108955^228108318-	sex-biased (female)	1
A5SS@MRPL9@chr1@-@151762113^151762025-@151762105^151762025-	sex-biased (female)	1
A5SS@N4BP2L2@chr13@-@32538683^32537027-@32538618^32537027-	sex-biased (female)	1
A5SS@NR3C2@chr4@-@148259978^148194862-@148259966^148194862-	sex-biased (female)	1
A5SS@POLM@chr7@-@44078756^44074530-@44078554^44078438-44078322^44076629-44076509^44074530-	sex-biased (female)	1
A5SS@POLM@chr7@-@44078756^44076629-@44078740^44076629-	sex-biased (female)	1
A5SS@PPIA@chr7@+@44798814^44799247-@44798904^44799247-	sex-biased (female)	1
A5SS@TMEM134@chr11@-@67468028^67467563-@67468017^67467563-	sex-biased (female)	1
A5SS@TMEM184B@chr22@-@38246806^38246100-@38246785^38246100-	sex-biased (female)	1
A5SS@TMEM218@chr11@-@125102734^125102317-@125102637^125102317-	sex-biased (female)	1
A5SS@TMEM218@chr11@-@125111585^125102809-@125111539^125102809-	sex-biased (female)	1
A5SS@TRAPPC4@chr11@+@119019317^119021760-@119019424^119020150-119020253^119021760-	sex-biased (female)	1
A5SS@ZNF131@chr5@+@43161606^43161709-@43161613^43161709-	sex-biased (female)	1
A5SS@ZNF160@chr19@-@53091637^53086321-@53091413^53086321-	sex-biased (female)	1
RI@ACTG1@chr17@-@81512734^81512360-@81512733^81512735-81512360^81512362-	sex-biased (female)	1
RI@ANKRD36B@chr2@-@97507995^97507657-@97507994^97507996-97507657^97507659-	sex-biased (female)	1
RI@ANKZF1@chr2@+@219236095^219236322-@219236094^219236096-219236322^219236324-	sex-biased (female)	1
RI@BRAT1@chr7@-@2540979^2539888-@2540978^2540980-2539888^2539890-	sex-biased (female)	1
RI@CARS2@chr13@-@110644065^110642521-@110644064^110644066-110642521^110642523-	sex-biased (female)	1
RI@CASP2@chr7@+@143300294^143303784-@143300293^143300295-143303784^143303786-	sex-biased (female)	1
RI@CENPT@chr16@-@67832455^67832315-@67832454^67832456-67832315^67832317-	sex-biased (female)	1
RI@DYNC2H1@chr11@+@103154606^103154695-@103154605^103154607-103154695^103154697-	sex-biased (female)	1
RI@ECHDC2@chr1@-@52906519^52905090-@52906518^52906520-52905090^52905092-	sex-biased (female)	1
RI@GPAT2@chr2@-@96025485^96024843-@96025484^96025486-96024843^96024845-	sex-biased (female)	1
RI@IDE@chr10@-@92508113^92507666-@92508112^92508114-92507666^92507668-	sex-biased (female)	1
RI@KAT6B@chr10@+@74981928^74985080-@74981927^74981929-74985080^74985082-	sex-biased (female)	1
RI@MAP2K2@chr19@-@4095388^4094498-@4095387^4095389-4094498^4094500-	sex-biased (female)	1
RI@MEGF6@chr1@-@3494613^3494499-@3494612^3494614-3494499^3494501-	sex-biased (female)	1
RI@MLXIPL@chr7@-@73594274^73593983-@73594273^73594275-73593983^73593985-	sex-biased (female)	1
RI@NDUFA5@chr7@-@123557625^123557448-@123557624^123557626-123557448^123557450-	sex-biased (female)	1
RI@P4HA2@chr5@-@132217752^132217348-@132217751^132217753-132217348^132217350-	sex-biased (female)	1
RI@PHGDH@chr1@+@119741897^119742807-@119741896^119741898-119742807^119742809-	sex-biased (female)	1
RI@PLAT@chr8@-@42182719^42182022-@42182718^42182720-42182022^42182024-	sex-biased (female)	1
RI@PODXL@chr7@-@131509365^131509028-@131509364^131509366-131509028^131509030-	sex-biased (female)	1
RI@ROBO3@chr11@+@124878796^124879190-@124878795^124878797-124879190^124879192-	sex-biased (female)	1
RI@RRP12@chr10@-@97358943^97358619-@97358942^97358944-97358619^97358621-	sex-biased (female)	1
RI@SCART1@chr10@+@133459804^133459878-@133459803^133459805-133459878^133459880-	sex-biased (female)	1
RI@SCN1B@chr19@+@35039706^35039797-@35039705^35039707-35039797^35039799-	sex-biased (female)	1
RI@SPEG@chr2@+@219464608^219466057-@219464607^219464609-219466057^219466059-	sex-biased (female)	1
RI@TAF9B@chrX@-@78137962^78137883-@78137961^78137963-78137883^78137885-	sex-biased (female)	1
RI@TRNAU1AP@chr1@+@28560732^28561346-@28560731^28560733-28561346^28561348-	sex-biased (female)	1
RI@TSPAN1@chr1@+@46184397^46184594-@46184396^46184398-46184594^46184596-	sex-biased (female)	1
RI@UBXN6@chr19@-@4446283^4446197-@4446282^4446284-4446197^4446199-	sex-biased (female)	1
SE@AC093512.2@chr16@+@30053499^30063729-@30053499^30054784-30054927^30055172-30055327^30063729-	sex-biased (female)	1
SE@ADAMTS13@chr9@+@133440525^133444863-@133440525^133442399-133442534^133442614-133442743^133443376-133443561^133444863-	sex-biased (female)	1
SE@ADPGK@chr15@-@72760407^72752895-@72760407^72755654-72755556^72752895-	sex-biased (female)	1
SE@AEBP2@chr12@+@19512465^19518087-@19512465^19514671-19514784^19515421-19515434^19518087-	sex-biased (female)	1
SE@AFMID@chr17@+@78202751^78205440-@78202751^78204656-78204741^78204828-78204900^78205093-78205190^78205440-	sex-biased (female)	1
SE@ARHGAP30@chr1@-@161069528^161054705-@161069528^161059716-161059614^161054705-	sex-biased (female)	1
SE@ARMCX2@chrX@-@101659758^101659136-@101659758^101659501-101659419^101659136-	sex-biased (female)	1
SE@ATP9B@chr18@+@79207012^79253381-@79207012^79209548-79209722^79213962-79214038^79253381-	sex-biased (female)	1
SE@ATP9B@chr18@+@79207012^79253381-@79207012^79213962-79214038^79253381-	sex-biased (female)	1
SE@BAHCC1@chr17@+@81445681^81447036-@81445681^81446738-81446830^81447036-	sex-biased (female)	1
SE@BAZ2B@chr2@-@159428311^159412545-@159428311^159428042-159427941^159412545-	sex-biased (female)	1
SE@BTN3A2@chr6@+@26368050^26368565-@26368050^26368178-26368267^26368565-	sex-biased (female)	1
SE@BTN3A2@chr6@+@26368050^26368565-@26368050^26368183-26368267^26368565-	sex-biased (female)	1
SE@C1orf112@chr1@+@169798958^169802621-@169798958^169800883-169800971^169802621-	sex-biased (female)	1
SE@CC2D2A@chr4@+@15478806^15480704-@15478806^15479219-15479328^15480704-	sex-biased (female)	1
SE@CC2D2A@chr4@+@15478806^15480704-@15478806^15479223-15479328^15480704-	sex-biased (female)	1
SE@CCDC61@chr19@+@45995504^46003008-@45995504^45996245-45996401^46003008-	sex-biased (female)	1
SE@CD44@chr11@+@35190065^35211246-@35190065^35196746-35196874^35198121-35198246^35201082-35201195^35201671-35201787^35204512-35204640^35206112-35206243^35208105-35208206^35209965-35210054^35211246-	sex-biased (female)	1
SE@CD44@chr11@+@35190065^35211246-@35190065^35196746-35196874^35198121-35198246^35208105-35208206^35209965-35210054^35211246-	sex-biased (female)	1
SE@CD44@chr11@+@35190065^35211246-@35190065^35198121-35198246^35201082-35201195^35201671-35201787^35204512-35204640^35206112-35206243^35208105-35208206^35209965-35210054^35211246-	sex-biased (female)	1
SE@CD44@chr11@+@35190065^35211246-@35190065^35198121-35198246^35208105-35208206^35209965-35210054^35211246-	sex-biased (female)	1
SE@CD44@chr11@+@35190065^35211246-@35190065^35204512-35204640^35206112-35206243^35208105-35208206^35209965-35210054^35211246-	sex-biased (female)	1
SE@CD44@chr11@+@35190065^35211246-@35190065^35208105-35208206^35209965-35210054^35211246-	sex-biased (female)	1
SE@CD44@chr11@+@35190065^35211246-@35190065^35209965-35210054^35211246-	sex-biased (female)	1
SE@CD44@chr11@+@35198246^35208105-@35198246^35201082-35201195^35201671-35201787^35204512-35204640^35206112-35206243^35208105-	sex-biased (female)	1
SE@CDC14B@chr9@-@96522506^96509789-@96522506^96515792-96515649^96509789-	sex-biased (female)	1
SE@CEP164@chr11@+@117335680^117344166-@117335680^117338566-117338668^117344166-	sex-biased (female)	1
SE@CEP170@chr1@-@243186259^243172846-@243186259^243186072-243185779^243176816-243176702^243172846-	sex-biased (female)	1
SE@COL4A5@chrX@+@108668504^108677500-@108668504^108670228-108670236^108674745-108674753^108677500-	sex-biased (female)	1
SE@COPB2@chr3@-@139389469^139383435-@139389469^139385200-139385004^139383435-	sex-biased (female)	1
SE@CYB5R2@chr11@-@7667728^7665546-@7667728^7666550-7666451^7665939-7665827^7665546-	sex-biased (female)	1
SE@DAGLB@chr7@-@6436362^6432959-@6436362^6435020-6434762^6432959-	sex-biased (female)	1
SE@DDX60@chr4@-@168267582^168262787-@168267582^168265614-168265465^168262787-	sex-biased (female)	1
SE@DEF8@chr16@+@89948814^89954243-@89948814^89949417-89949513^89954243-	sex-biased (female)	1
SE@DISP1@chr1@+@222815078^222835119-@222815078^222823856-222823945^222827428-222827601^222835119-	sex-biased (female)	1
SE@DISP1@chr1@+@222815078^222835119-@222815078^222823884-222823945^222824200-222824339^222827428-222827601^222835119-	sex-biased (female)	1
SE@DMKN@chr19@-@35509911^35505986-@35509911^35508240-35508205^35507511-35507458^35506185-35506126^35505986-	sex-biased (female)	1
SE@DYRK2@chr12@+@67649182^67657106-@67649182^67649797-67649945^67657106-	sex-biased (female)	1
SE@EFCAB13@chr17@+@47345098^47370437-@47345098^47361378-47361521^47370437-	sex-biased (female)	1
SE@EIF4G1@chr3@+@184314674^184317321-@184314674^184315489-184315545^184315763-184315856^184316072-184316218^184316713-184316733^184317321-	sex-biased (female)	1
SE@EIF4G1@chr3@+@184314674^184317321-@184314674^184315489-184315545^184315763-184315856^184316072-184316218^184317321-	sex-biased (female)	1
SE@EIF4G1@chr3@+@184314674^184317321-@184314674^184315489-184315545^184315763-184315856^184316132-184316218^184316713-184316733^184317321-	sex-biased (female)	1
SE@EIF4G1@chr3@+@184314674^184317321-@184314674^184315489-184315545^184315763-184315856^184316132-184316218^184317321-	sex-biased (female)	1
SE@EIF4G1@chr3@+@184314674^184317321-@184314674^184315763-184315856^184316072-184316218^184317321-	sex-biased (female)	1
SE@EIF4G1@chr3@+@184314674^184317321-@184314674^184315763-184315856^184316132-184316218^184316713-184316733^184317321-	sex-biased (female)	1
SE@EIF4G1@chr3@+@184314674^184317321-@184314674^184315763-184315856^184316132-184316218^184317321-	sex-biased (female)	1
SE@EIF4G1@chr3@+@184315545^184317321-@184315545^184315763-184315856^184316072-184316218^184316713-184316733^184317321-	sex-biased (female)	1
SE@ELMOD3@chr2@+@85354829^85356967-@85354829^85355555-85355598^85356967-	sex-biased (female)	1
SE@FAM114A1@chr4@+@38867834^38878071-@38867834^38868398-38868546^38878071-	sex-biased (female)	1
SE@FAM189A2@chr9@+@69385947^69388158-@69385947^69386559-69387683^69388158-	sex-biased (female)	1
SE@FBXW11@chr5@-@171996890^171910797-@171996890^171957698-171957597^171914405-171914343^171910797-	sex-biased (female)	1
SE@GFM2@chr5@-@74733022^74726126-@74733022^74730398-74730260^74726126-	sex-biased (female)	1
SE@GPCPD1@chr20@-@5593327^5584322-@5593327^5586269-5586194^5584322-	sex-biased (female)	1
SE@GTPBP1@chr22@+@38734397^38736029-@38734397^38735174-38735310^38736029-	sex-biased (female)	1
SE@GUSB@chr7@-@65980224^65976202-@65980224^65979541-65979386^65976202-	sex-biased (female)	1
SE@HAPLN3@chr15@-@88881357^88879269-@88881357^88879452-88879418^88879269-	sex-biased (female)	1
SE@HAPLN3@chr15@-@88881357^88879269-@88881357^88880610-88879418^88879269-	sex-biased (female)	1
SE@HCFC1@chrX@-@153962222^153960414-@153962222^153961648-153961542^153960414-	sex-biased (female)	1
SE@HMGN1@chr21@-@39348292^39345958-@39348292^39347952-39347916^39347483-39347379^39347292-39347114^39345958-	sex-biased (female)	1
SE@HOMER3@chr19@-@18941051^18939049-@18941051^18940404-18940321^18939049-	sex-biased (female)	1
SE@IRAG1@chr11@-@10690265^10652182-@10690265^10687777-10687509^10652182-	sex-biased (female)	1
SE@IRAG1@chr11@-@10693462^10652182-@10693462^10690369-10690265^10652182-	sex-biased (female)	1
SE@IVNS1ABP@chr1@-@185307014^185305643-@185307014^185306625-185306485^185305643-	sex-biased (female)	1
SE@KIAA0586@chr14@+@58512627^58547781-@58512627^58540071-58540136^58543883-58543967^58547781-	sex-biased (female)	1
SE@LCORL@chr4@-@17909094^17845901-@17909094^17886161-17886068^17884752-17884275^17867025-17866999^17845901-	sex-biased (female)	1
SE@LDLRAD3@chr11@+@36098461^36229160-@36098461^36101915-36102031^36227085-36227430^36229160-	sex-biased (female)	1
SE@LRIF1@chr1@-@110963621^110950123-@110963621^110952815-110951288^110950123-	sex-biased (female)	1
SE@LRRFIP1@chr2@+@237727935^237748364-@237727935^237733774-237733818^237735268-237735333^237739232-237739309^237748364-	sex-biased (female)	1
SE@LYPLAL1@chr1@+@219179246^219210532-@219179246^219179400-219179426^219193082-219193251^219210532-	sex-biased (female)	1
SE@MICU3@chr8@+@17064237^17077783-@17064237^17069688-17069719^17077783-	sex-biased (female)	1
SE@MKS1@chr17@-@58216088^58214387-@58216088^58215444-58215301^58214898-58214741^58214387-	sex-biased (female)	1
SE@MLF1@chr3@+@158571347^158592434-@158571347^158588852-158588924^158592434-	sex-biased (female)	1
SE@MRPL22@chr5@+@154941265^154956371-@154941265^154950803-154950938^154956371-	sex-biased (female)	1
SE@MRPL22@chr5@+@154941265^154956371-@154941265^154950821-154950938^154956371-	sex-biased (female)	1
SE@MRPL55@chr1@-@228109149^228108318-@228109149^228109021-228108437^228108318-	sex-biased (female)	1
SE@MRPL55@chr1@-@228109149^228108318-@228109149^228109021-228108955^228108318-	sex-biased (female)	1
SE@MRPL55@chr1@-@228109149^228108318-@228109149^228109021-228108955^228108474-228108437^228108318-	sex-biased (female)	1
SE@MRPL55@chr1@-@228109261^228108318-@228109261^228108474-228108437^228108318-	sex-biased (female)	1
SE@MRPL55@chr1@-@228109261^228108318-@228109261^228109021-228108437^228108318-	sex-biased (female)	1
SE@MRPL55@chr1@-@228109261^228108318-@228109261^228109021-228108955^228108318-	sex-biased (female)	1
SE@MRPL55@chr1@-@228109261^228108318-@228109261^228109021-228108955^228108474-228108437^228108318-	sex-biased (female)	1
SE@MTHFSD@chr16@-@86548464^86546649-@86548464^86548111-86548035^86546649-	sex-biased (female)	1
SE@NEIL1@chr15@+@75352701^75354250-@75352701^75353739-75353866^75354250-	sex-biased (female)	1
SE@NFIC@chr19@+@3452666^3462752-@3452666^3453763-3453916^3456550-3456635^3462752-	sex-biased (female)	1
SE@NHLRC3@chr13@+@39039711^39044090-@39039711^39042105-39042305^39044090-	sex-biased (female)	1
SE@NSMF@chr9@-@137456411^137454443-@137456411^137455634-137455629^137454443-	sex-biased (female)	1
SE@OPTN@chr10@+@13108289^13109112-@13108289^13108962-13109015^13109112-	sex-biased (female)	1
SE@PCED1B@chr12@+@47104195^47235007-@47104195^47216222-47216689^47235007-	sex-biased (female)	1
SE@PDCD10@chr3@-@167734806^167720273-@167734806^167734246-167734214^167720273-	sex-biased (female)	1
SE@PDCD10@chr3@-@167734806^167720273-@167734806^167734345-167734214^167720273-	sex-biased (female)	1
SE@PDCD10@chr3@-@167734806^167720273-@167734806^167734350-167734214^167720273-	sex-biased (female)	1
SE@PDLIM7@chr5@-@177492405^177491420-@177492405^177491925-177491807^177491420-	sex-biased (female)	1
SE@PHF3@chr6@+@63636150^63680000-@63636150^63646527-63646795^63680000-	sex-biased (female)	1
SE@PHF3@chr6@+@63636150^63680000-@63636150^63646619-63646795^63680000-	sex-biased (female)	1
SE@PIKFYVE@chr2@+@208273733^208285726-@208273733^208276712-208276830^208277537-208277708^208285726-	sex-biased (female)	1
SE@PPP1R32@chr11@+@61485911^61486524-@61485911^61486344-61486403^61486524-	sex-biased (female)	1
SE@PTDSS2@chr11@+@460288^479085-@460288^473895-473977^479085-	sex-biased (female)	1
SE@PTPN3@chr9@-@109426950^109420600-@109426950^109422852-109422718^109420600-	sex-biased (female)	1
SE@PTPRM@chr18@+@8247919^8296368-@8247919^8248150-8248176^8296368-	sex-biased (female)	1
SE@R3HCC1L@chr10@+@98163397^98208101-@98163397^98186467-98186563^98208101-	sex-biased (female)	1
SE@RCC1@chr1@+@28508905^28529858-@28508905^28516725-28516853^28529858-	sex-biased (female)	1
SE@RGN@chrX@+@47084600^47091678-@47084600^47089776-47089991^47091678-	sex-biased (female)	1
SE@RGPD5@chr2@+@109808404^109813460-@109808404^109808750-109808895^109813460-	sex-biased (female)	1
SE@RNF212@chr4@-@1058321^1056503-@1058321^1057004-1056838^1056503-	sex-biased (female)	1
SE@RPL37A@chr2@+@216500031^216529270-@216500031^216519332-216519390^216520714-216520774^216529270-	sex-biased (female)	1
SE@RPL37A@chr2@+@216500031^216529270-@216500031^216520714-216520774^216529270-	sex-biased (female)	1
SE@RPP40@chr6@-@5002101^4999904-@5002101^5000631-5000563^4999904-	sex-biased (female)	1
SE@RPP40@chr6@-@5002101^4999904-@5002101^5001130-5001094^5000631-5000563^4999904-	sex-biased (female)	1
SE@SBF1@chr22@-@50459255^50456673-@50459255^50457111-50457034^50456673-	sex-biased (female)	1
SE@SENP6@chr6@+@75634811^75647731-@75634811^75640684-75640704^75647731-	sex-biased (female)	1
SE@SENP6@chr6@+@75634811^75647731-@75634811^75640687-75640704^75647731-	sex-biased (female)	1
SE@SLAIN2@chr4@+@48383784^48420125-@48383784^48394576-48394653^48420125-	sex-biased (female)	1
SE@SLC10A7@chr4@-@146258692^146256520-@146258692^146256936-146256826^146256520-	sex-biased (female)	1
SE@SLC25A40@chr7@-@87860572^87858751-@87860572^87860169-87860072^87858751-	sex-biased (female)	1
SE@SLC46A1@chr17@-@28404616^28400766-@28404616^28402321-28402238^28400766-	sex-biased (female)	1
SE@SORBS2@chr4@-@185646668^185635411-@185646668^185639035-185638877^185635411-	sex-biased (female)	1
SE@SPOP@chr17@-@49675895^49622876-@49675895^49636809-49636759^49622876-	sex-biased (female)	1
SE@SREK1@chr5@+@66153596^66159219-@66153596^66158809-66158932^66159219-	sex-biased (female)	1
SE@SRRM1@chr1@+@24646789^24648859-@24646789^24647079-24647208^24648024-24648166^24648859-	sex-biased (female)	1
SE@SRRM1@chr1@+@24646789^24648859-@24646789^24647079-24647208^24648859-	sex-biased (female)	1
SE@ST7L@chr1@-@112541951^112526111-@112541951^112540872-112540779^112526111-	sex-biased (female)	1
SE@ST7L@chr1@-@112541951^112526111-@112541951^112540872-112540779^112539275-112539159^112526111-	sex-biased (female)	1
SE@SYNE1@chr6@-@152369471^152367382-@152369471^152369127-152368972^152367382-	sex-biased (female)	1
SE@SYTL2@chr11@-@85718790^85714507-@85718790^85717530-85717483^85717140-85717045^85714507-	sex-biased (female)	1
SE@TBRG1@chr11@+@124625903^124626904-@124625903^124626473-124626609^124626904-	sex-biased (female)	1
SE@TEP1@chr14@-@20381913^20381401-@20381913^20381686-20381553^20381401-	sex-biased (female)	1
SE@TEPSIN@chr17@-@81238514^81237459-@81238514^81237660-81237551^81237459-	sex-biased (female)	1
SE@TMEM116@chr12@-@111991758^111938210-@111991758^111978787-111978736^111965759-111965595^111943369-111943265^111938210-	sex-biased (female)	1
SE@TRAPPC2@chrX@-@13734525^13719982-@13734525^13734185-13734044^13720497-13720428^13719982-	sex-biased (female)	1
SE@TRMT11@chr6@+@126008472^126011253-@126008472^126008657-126008745^126011253-	sex-biased (female)	1
SE@TXNDC11@chr16@-@11736017^11721670-@11736017^11734079-11733982^11721670-	sex-biased (female)	1
SE@U2SURP@chr3@+@143023064^143027149-@143023064^143023975-143024018^143024484-143024548^143027149-	sex-biased (female)	1
SE@UBE3A@chr15@-@25438489^25409207-@25438489^25420752-25420656^25415842-25415710^25411971-25411908^25409207-	sex-biased (female)	1
SE@UBE3A@chr15@-@25438489^25409207-@25438489^25421961-25421926^25411971-25411908^25409207-	sex-biased (female)	1
SE@UBN1@chr16@+@4861102^4870212-@4861102^4868833-4868903^4870212-	sex-biased (female)	1
SE@UBXN2B@chr8@+@58434504^58439633-@58434504^58434858-58434948^58439633-	sex-biased (female)	1
SE@UGP2@chr2@+@63842437^63856306-@63842437^63842539-63842599^63856306-	sex-biased (female)	1
SE@UGP2@chr2@+@63842599^63856306-@63842599^63855567-63855643^63856306-	sex-biased (female)	1
SE@UGP2@chr2@+@63856882^63857829-@63856882^63857550-63857718^63857829-	sex-biased (female)	1
SE@VCAN@chr5@+@83512396^83545537-@83512396^83519349-83522309^83537007-83542268^83545537-	sex-biased (female)	1
SE@WARS1@chr14@-@100375283^100369258-@100375283^100374244-100374136^100369258-	sex-biased (female)	1
SE@WARS1@chr14@-@100375283^100369258-@100375283^100374265-100374136^100369258-	sex-biased (female)	1
SE@WARS1@chr14@-@100376260^100369258-@100376260^100374244-100374136^100369258-	sex-biased (female)	1
SE@WARS1@chr14@-@100376260^100369258-@100376260^100375406-100375283^100374244-100374136^100369258-	sex-biased (female)	1
SE@WARS1@chr14@-@100376260^100369258-@100376260^100375406-100375283^100374265-100374136^100369258-	sex-biased (female)	1
SE@WARS1@chr14@-@100376260^100369258-@100376260^100375546-100375283^100374244-100374136^100369258-	sex-biased (female)	1
SE@XRRA1@chr11@-@74906239^74851203-@74906239^74863021-74862981^74859283-74859158^74852082-74851989^74851203-	sex-biased (female)	1
SE@YDJC@chr22@-@21629308^21628787-@21629308^21629187-21629010^21628787-	sex-biased (female)	1
SE@ZNF160@chr19@-@53091637^53086321-@53091637^53091497-53091413^53086321-	sex-biased (female)	1
SE@ZNF160@chr19@-@53091637^53086321-@53091637^53091529-53091413^53086321-	sex-biased (female)	1
SE@ZNF160@chr19@-@53091637^53086321-@53091637^53091553-53091413^53086321-	sex-biased (female)	1
SE@ZNF558@chr19@-@8831318^8825108-@8831318^8830891-8830770^8825108-	sex-biased (female)	1
SE@ZNF589@chr3@+@48247677^48260813-@48247677^48256711-48257022^48257929-48257961^48260813-	sex-biased (female)	1
SE@ZNF621@chr3@+@40525864^40530209-@40525864^40529319-40529445^40530209-	sex-biased (female)	1
SE@ZSCAN9@chr6@+@28227837^28232562-@28227837^28230402-28230488^28232562-	sex-biased (female)	1
A3SS@ABLIM1@chr10@-@114451624^114448020-@114451624^114448026-	sex-biased (male)	1
A3SS@ADGRB2@chr1@-@31728598^31728277-@31728598^31728280-	sex-biased (male)	1
A3SS@DDX60L@chr4@-@168400826^168396124-@168400826^168396127-	sex-biased (male)	1
A3SS@DPP4@chr2@-@162073399^162047498-@162073399^162047501-	sex-biased (male)	1
A3SS@DTX3@chr12@+@57604858^57605571-@57604858^57605344-	sex-biased (male)	1
A3SS@LST1@chr6@+@31587966^31588518-@31587966^31588497-	sex-biased (male)	1
A3SS@MINDY1@chr1@-@151006312^151002323-@151006312^151002968-	sex-biased (male)	1
A3SS@NSD2@chr4@+@1952231^1953324-@1952231^1952752-	sex-biased (male)	1
A3SS@PABPC4@chr1@-@39564423^39563741-@39564423^39563922-	sex-biased (male)	1
A3SS@PABPC4@chr1@-@39564423^39563741-39563614^39562416-@39564423^39563922-	sex-biased (male)	1
A3SS@PRMT7@chr16@+@68352409^68353492-@68352409^68353395-	sex-biased (male)	1
A3SS@RASGRP2@chr11@-@64740948^64740446-@64740948^64740449-	sex-biased (male)	1
A3SS@RSRP1@chr1@-@25244454^25243633-@25244454^25244224-	sex-biased (male)	1
A3SS@SLC35C2@chr20@-@46355802^46355178-@46355802^46355279-	sex-biased (male)	1
A3SS@SPG7@chr16@+@89554563^89555959-@89554563^89555878-	sex-biased (male)	1
A3SS@TCEAL7@chrX@+@103330304^103330977-@103330304^103330923-	sex-biased (male)	1
A3SS@TRIM8@chr10@+@102656137^102656248-@102656137^102656245-	sex-biased (male)	1
A3SS@ZNF692@chr1@-@248858131^248857859-@248858131^248858034-	sex-biased (male)	1
A5SS@FBXO44@chr1@+@11658364^11658533-@11658393^11658533-	sex-biased (male)	1
A5SS@THUMPD2@chr2@-@39769758^39768501-@39769710^39768501-	sex-biased (male)	1
A5SS@VRK3@chr19@-@50025346^50020647-@50025267^50020647-	sex-biased (male)	1
RI@ACP2@chr11@-@47248038^47247727-@47248037^47248039-47247727^47247729-	sex-biased (male)	1
RI@CACNA2D3@chr3@+@55073557^55073777-@55073556^55073558-55073777^55073779-	sex-biased (male)	1
RI@CTSK@chr1@-@150799544^150799273-@150799543^150799545-150799273^150799275-	sex-biased (male)	1
RI@CTSK@chr1@-@150806686^150806224-@150806685^150806687-150806224^150806226-	sex-biased (male)	1
RI@CYP1A1@chr15@-@74720967^74720774-@74720966^74720968-74720774^74720776-	sex-biased (male)	1
RI@FAH@chr15@+@80152841^80153026-@80152840^80152842-80153026^80153028-	sex-biased (male)	1
RI@FNDC4@chr2@-@27494351^27494134-@27494350^27494352-27494134^27494136-	sex-biased (male)	1
RI@G3BP2@chr4@-@75655066^75654081-@75655065^75655067-75654081^75654083-	sex-biased (male)	1
RI@HOOK2@chr19@-@12774812^12774741-@12774811^12774813-12774741^12774743-	sex-biased (male)	1
RI@IRAG2@chr12@+@25079462^25079656-@25079461^25079463-25079656^25079658-	sex-biased (male)	1
RI@MAN2A2@chr15@+@90912279^90912542-@90912278^90912280-90912542^90912544-	sex-biased (male)	1
RI@MAP2K7@chr19@+@7910129^7910260-@7910128^7910130-7910260^7910262-	sex-biased (male)	1
RI@MICALL2@chr7@-@1442192^1440684-@1442191^1442193-1440684^1440686-	sex-biased (male)	1
RI@NDRG4@chr16@+@58507864^58507948-@58507863^58507865-58507948^58507950-	sex-biased (male)	1
RI@NDRG4@chr16@+@58509009^58509154-@58509008^58509010-58509154^58509156-	sex-biased (male)	1
RI@PCSK7@chr11@-@117224078^117223308-@117224077^117224079-117223308^117223310-	sex-biased (male)	1
RI@SAMHD1@chr20@-@36912461^36911333-@36912460^36912462-36911333^36911335-	sex-biased (male)	1
RI@SKP2@chr5@+@36152270^36152771-@36152269^36152271-36152771^36152773-	sex-biased (male)	1
RI@SNRPA1@chr15@-@101286908^101285801-@101286907^101286909-101285801^101285803-	sex-biased (male)	1
SE@AASS@chr7@-@122101371^122098576-@122101371^122098866-122098749^122098576-	sex-biased (male)	1
SE@ABCA5@chr17@-@69253573^69250621-@69253573^69251866-69251747^69250621-	sex-biased (male)	1
SE@ABI3BP@chr3@-@100832264^100824941-@100832264^100829664-100829581^100825844-100825785^100824941-	sex-biased (male)	1
SE@ABI3BP@chr3@-@100832264^100824941-@100832264^100830634-100830578^100828452-100828393^100825844-100825785^100824941-	sex-biased (male)	1
SE@ABI3BP@chr3@-@100832264^100824941-@100832264^100830634-100830578^100829664-100829581^100828452-100828393^100825844-100825785^100824941-	sex-biased (male)	1
SE@ABI3BP@chr3@-@100832264^100829664-@100832264^100830634-100830578^100829664-	sex-biased (male)	1
SE@ACSL4@chrX@-@109733139^109683666-@109733139^109696196-109696144^109685444-109685427^109683666-	sex-biased (male)	1
SE@ADAP2@chr17@+@30923070^30931889-@30923070^30926809-30926918^30931889-	sex-biased (male)	1
SE@AMN1@chr12@-@31728971^31702007-@31728971^31719356-31719218^31714951-31714882^31714631-31714441^31709425-31709293^31702007-	sex-biased (male)	1
SE@ANKDD1A@chr15@+@64943582^64947404-@64943582^64944652-64944747^64947404-	sex-biased (male)	1
SE@ANKRD36B@chr2@-@97584944^97560860-@97584944^97580568-97580462^97579043-97578906^97560860-	sex-biased (male)	1
SE@ANKRD36B@chr2@-@97584944^97560860-@97584944^97580568-97580462^97579043-97578906^97576446-97576379^97560860-	sex-biased (male)	1
SE@ATP5MD@chr10@-@103395746^103392466-@103395746^103394394-103394199^103392466-	sex-biased (male)	1
SE@ATR@chr3@-@142453128^142449602-@142453128^142450602-142450466^142449602-	sex-biased (male)	1
SE@ATXN3@chr14@-@92049603^92044958-@92049603^92048089-92047896^92044958-	sex-biased (male)	1
SE@BAALC@chr8@+@103141057^103227989-@103141057^103200658-103200762^103212919-103213085^103227989-	sex-biased (male)	1
SE@CCM2@chr7@+@45000363^45063918-@45000363^45029444-45029509^45038253-45038426^45063918-	sex-biased (male)	1
SE@CD209@chr19@-@7747306^7746087-@7747306^7746531-7746460^7746087-	sex-biased (male)	1
SE@CELF1@chr11@-@47552992^47489024-@47552992^47500932-47500861^47499604-47499453^47489024-	sex-biased (male)	1
SE@CHN1@chr2@-@174877840^174824518-@174877840^174875865-174875788^174872114-174872020^174846957-174846880^174824518-	sex-biased (male)	1
SE@CMKLR1@chr12@-@108339027^108293664-@108339027^108330207-108329995^108293664-	sex-biased (male)	1
SE@CNOT4@chr7@-@135393918^135363186-@135393918^135364066-135363854^135363186-	sex-biased (male)	1
SE@CTSB@chr8@-@11868001^11861479-@11868001^11864483-11864376^11861479-	sex-biased (male)	1
SE@CYP4F12@chr19@+@15680519^15682389-@15680519^15681060-15681163^15681685-15681722^15682389-	sex-biased (male)	1
SE@DCAF6@chr1@+@168004793^168022988-@168004793^168015781-168015951^168022988-	sex-biased (male)	1
SE@DCAF6@chr1@+@168004793^168022988-@168004793^168019545-168019667^168022988-	sex-biased (male)	1
SE@DCN@chr12@-@91182655^91178585-@91182655^91179686-91179362^91178585-	sex-biased (male)	1
SE@DLG1@chr3@-@197081051^197075870-@197081051^197076682-197076586^197075870-	sex-biased (male)	1
SE@DMKN@chr19@-@35508205^35505986-@35508205^35506185-35506126^35505986-	sex-biased (male)	1
SE@DNAAF2@chr14@-@49633287^49626048-@49633287^49628155-49628012^49626048-	sex-biased (male)	1
SE@ECHDC2@chr1@-@52921553^52911790-@52921553^52914095-52913895^52911790-	sex-biased (male)	1
SE@EGFLAM@chr5@+@38438455^38448301-@38438455^38445679-38445702^38448301-	sex-biased (male)	1
SE@EPB41L2@chr6@-@130885096^130870126-@130885096^130880206-130880144^130878250-130878104^130876775-130876674^130870381-130870328^130870126-	sex-biased (male)	1
SE@ERBIN@chr5@+@66054951^66075024-@66054951^66072169-66072291^66075024-	sex-biased (male)	1
SE@FAM13B@chr5@-@137959616^137954376-@137959616^137956542-137956477^137954376-	sex-biased (male)	1
SE@FUBP1@chr1@-@77949155^77945642-@77949155^77947547-77947453^77946576-77946530^77945642-	sex-biased (male)	1
SE@GPS1@chr17@+@82051524^82053274-@82051524^82052256-82052459^82053274-	sex-biased (male)	1
SE@HARS1@chr5@-@140690855^140679883-@140690855^140683664-140683546^140683219-140683100^140679883-	sex-biased (male)	1
SE@HARS1@chr5@-@140690855^140679883-@140690855^140683667-140683546^140683219-140683100^140679883-	sex-biased (male)	1
SE@HARS1@chr5@-@140690855^140679883-@140690855^140687933-140687746^140683219-140683100^140679883-	sex-biased (male)	1
SE@HARS1@chr5@-@140690855^140679883-@140690855^140687933-140687746^140687542-140687421^140683219-140683100^140679883-	sex-biased (male)	1
SE@HNRNPC@chr14@-@21269298^21234229-@21269298^21263336-21263311^21236460-21236373^21234229-	sex-biased (male)	1
SE@IFI44L@chr1@+@78620571^78628951-@78620571^78627906-78628393^78628951-	sex-biased (male)	1
SE@IMMP1L@chr11@-@31463172^31456386-@31463172^31460714-31460626^31456386-	sex-biased (male)	1
SE@KCP@chr7@-@128880619^128879829-@128880619^128880528-128880386^128880085-128879913^128879829-	sex-biased (male)	1
SE@KIAA1841@chr2@+@61071792^61076920-@61071792^61073458-61073551^61076920-	sex-biased (male)	1
SE@LMO7@chr13@+@75836457^75840085-@75836457^75838140-75838196^75840085-	sex-biased (male)	1
SE@LPP@chr3@+@188225527^188406112-@188225527^188341663-188341719^188406112-	sex-biased (male)	1
SE@LST1@chr6@+@31587318^31587944-@31587318^31587641-31587733^31587944-	sex-biased (male)	1
SE@MACF1@chr1@+@39327353^39349478-@39327353^39331203-39336653^39337182-39337331^39340502-39340717^39340804-39340953^39346977-39347210^39349478-	sex-biased (male)	1
SE@MAST2@chr1@+@45997799^46002805-@45997799^46000959-46000979^46002805-	sex-biased (male)	1
SE@MCEE@chr2@-@71130180^71124543-@71130180^71129817-71129717^71124543-	sex-biased (male)	1
SE@MOSPD1@chrX@-@134896817^134889192-@134896817^134891640-134891479^134889192-	sex-biased (male)	1
SE@MTMR10@chr15@-@30967920^30961073-@30967920^30966040-30965875^30961073-	sex-biased (male)	1
SE@NAALADL1@chr11@-@65047647^65046362-@65047647^65047565-65047475^65046526-65046445^65046362-	sex-biased (male)	1
SE@NFIB@chr9@-@14120440^14088326-@14120440^14102510-14102422^14088326-	sex-biased (male)	1
SE@NIPA2@chr15@+@22838921^22851639-@22838921^22839062-22839174^22839655-22839790^22851639-	sex-biased (male)	1
SE@NIPA2@chr15@+@22838921^22851639-@22838921^22839655-22839790^22851639-	sex-biased (male)	1
SE@NIPA2@chr15@+@22839790^22851639-@22839790^22845146-22845267^22851639-	sex-biased (male)	1
SE@NR4A1@chr12@+@52043911^52054327-@52043911^52052496-52052645^52054327-	sex-biased (male)	1
SE@NSMF@chr9@-@137456411^137454443-@137456411^137455307-137455239^137454443-	sex-biased (male)	1
SE@NSMF@chr9@-@137456411^137454443-@137456411^137455634-137455629^137455307-137455239^137454443-	sex-biased (male)	1
SE@OFD1@chrX@+@13762444^13767127-@13762444^13763745-13763855^13767127-	sex-biased (male)	1
SE@POFUT2@chr21@-@45285678^45282459-@45285678^45285328-45285269^45283527-45283352^45282459-	sex-biased (male)	1
SE@PTPRS@chr19@-@5218420^5215595-@5218420^5216767-5216720^5215595-	sex-biased (male)	1
SE@PWWP2A@chr5@-@160093101^160080770-@160093101^160089610-160089506^160080770-	sex-biased (male)	1
SE@RBM4B@chr11@-@66668615^66665578-@66668615^66666493-66666272^66665578-	sex-biased (male)	1
SE@RCOR3@chr1@+@211304140^211312720-@211304140^211312355-211312487^211312720-	sex-biased (male)	1
SE@RHOT1@chr17@+@32208309^32253085-@32208309^32211116-32211238^32253085-	sex-biased (male)	1
SE@RNF217@chr6@+@124963426^125045211-@124963426^124971501-124971598^125045211-	sex-biased (male)	1
SE@SAMD4B@chr19@+@39342576^39356689-@39342576^39348288-39348389^39351817-39352374^39354006-39354066^39356689-	sex-biased (male)	1
SE@SCMH1@chr1@-@41160875^41151684-@41160875^41159933-41159725^41151684-	sex-biased (male)	1
SE@SMPDL3A@chr6@+@122789458^122796824-@122789458^122795677-122795890^122796824-	sex-biased (male)	1
SE@SORBS2@chr4@-@185734099^185678822-@185734099^185690611-185690562^185678822-	sex-biased (male)	1
SE@STARD4@chr5@-@111506330^111501116-@111506330^111502088-111501962^111501116-	sex-biased (male)	1
SE@STRN3@chr14@-@30935163^30919106-@30935163^30929311-30929201^30919106-	sex-biased (male)	1
SE@TEPSIN@chr17@-@81238986^81237459-@81238986^81238873-81238514^81237660-81237551^81237459-	sex-biased (male)	1
SE@TFEC@chr7@-@115984262^115956793-@115984262^115974256-115974170^115956793-	sex-biased (male)	1
SE@TNS1@chr2@-@217831455^217821938-@217831455^217830390-217830367^217821938-	sex-biased (male)	1
SE@TNS1@chr2@-@217831455^217821938-@217831455^217830390-217830367^217829882-217829844^217821938-	sex-biased (male)	1
SE@TNXB@chr6@-@32088785^32086118-@32088785^32087991-32087251^32086118-	sex-biased (male)	1
SE@USP8@chr15@+@50482065^50489801-@50482065^50484275-50484361^50489801-	sex-biased (male)	1
SE@VEGFA@chr6@+@43778918^43784541-@43778918^43780732-43780785^43781956-43782087^43784541-	sex-biased (male)	1
SE@VEGFA@chr6@+@43778918^43784541-@43778918^43780732-43780803^43781956-43782087^43784541-	sex-biased (male)	1
SE@VEGFA@chr6@+@43778918^43784541-@43778918^43780732-43780803^43784541-	sex-biased (male)	1
SE@VEGFA@chr6@+@43778918^43784541-@43778918^43780732-43780854^43781956-43782087^43784541-	sex-biased (male)	1
SE@VEGFA@chr6@+@43778918^43784541-@43778918^43781956-43782087^43784541-	sex-biased (male)	1
SE@ZBTB7B@chr1@+@155002943^155014655-@155002943^155014015-155014093^155014655-	sex-biased (male)	1
SE@ZNF211@chr19@+@57634755^57640704-@57634755^57639912-57640067^57640704-	sex-biased (male)	1
SE@ZNF250@chr8@-@144889581^144880458-@144889581^144886902-144886840^144880458-	sex-biased (male)	1
SE@ZNF346@chr5@+@177041870^177062058-@177041870^177050751-177050936^177062058-	sex-biased (male)	1
SE@ZNF438@chr10@-@30941575^30909015-@30941575^30910440-30910360^30909015-	sex-biased (male)	1
RI@ESYT1@chr12@+@56131113^56131244-@56131112^56131114-56131244^56131246-	sex-common	2
RI@GPAT3@chr4@+@83536206^83536504-@83536205^83536207-83536504^83536506-	sex-common	2
SE@CCNL1@chr3@-@157152177^157150381-@157152177^157151930-157151729^157151591-157151486^157150381-	sex-common	2
SE@CCSER2@chr10@+@84477664^84513449-@84477664^84499875-84499959^84507294-84507333^84513449-	sex-common	2
SE@CCSER2@chr10@+@84477664^84513449-@84477664^84499875-84499959^84513449-	sex-common	2
SE@DLG1@chr3@-@197081051^197075870-@197081051^197076682-197076586^197075870-	sex-common	2
SE@DLG1@chr3@-@197081051^197075870-@197081051^197076685-197076586^197075870-	sex-common	2
SE@DNM1@chr9@+@128239779^128242232-@128239779^128239985-128239996^128242232-	sex-common	2
SE@HES4@chr1@-@999866^999613-@999866^999787-999692^999613-	sex-common	2
SE@JAG2@chr14@-@105151283^105150911-@105151283^105151104-105150991^105150911-	sex-common	2
SE@LST1@chr6@+@31587318^31588563-@31587318^31587641-31587733^31587944-31587966^31588563-	sex-common	2
SE@LST1@chr6@+@31587318^31588563-@31587318^31587641-31587733^31588563-	sex-common	2
SE@WARS1@chr14@-@100375283^100369258-@100375283^100374244-100374136^100369258-	sex-common	2
SE@WARS1@chr14@-@100376260^100369258-@100376260^100374244-100374136^100369258-	sex-common	2
SE@WARS1@chr14@-@100376260^100369258-@100376260^100375406-100375283^100374244-100374136^100369258-	sex-common	2
SE@WARS1@chr14@-@100376260^100369258-@100376260^100375406-100375283^100374265-100374136^100369258-	sex-common	2
SE@WARS1@chr14@-@100376260^100369258-@100376260^100375546-100375283^100374244-100374136^100369258-	sex-common	2
SE@WDR86@chr7@-@151395776^151381981-@151395776^151385287-151385088^151381981-	sex-common	2
A3SS@ADAM15@chr1@+@155060832^155061418-@155060832^155061415-	sex-biased (female)	2
A3SS@ADAMTS7@chr15@-@78789689^78788298-@78789689^78788374-	sex-biased (female)	2
A3SS@AFDN@chr6@+@167864746^167870386-@167864746^167870383-	sex-biased (female)	2
A3SS@AGTPBP1@chr9@-@85657435^85655200-@85657435^85655320-	sex-biased (female)	2
A3SS@ARHGAP25@chr2@+@68787956^68807276-@68787956^68807273-	sex-biased (female)	2
A3SS@BRPF1@chr3@+@9743253^9743581-@9743253^9743578-	sex-biased (female)	2
A3SS@CCDC82@chr11@-@96364980^96359097-@96364980^96359178-	sex-biased (female)	2
A3SS@DENND1C@chr19@-@6475837^6475643-@6475837^6475751-	sex-biased (female)	2
A3SS@DUS3L@chr19@-@5787061^5786845-@5787061^5786919-	sex-biased (female)	2
A3SS@EGFL7@chr9@+@136663623^136664695-@136663623^136664692-	sex-biased (female)	2
A3SS@ENO2@chr12@+@6914659^6915821-@6914659^6915436-	sex-biased (female)	2
A3SS@ENO2@chr12@+@6914659^6915821-@6914659^6915818-	sex-biased (female)	2
A3SS@FAM118B@chr11@+@126256852^126261428-@126256852^126261425-	sex-biased (female)	2
A3SS@FAM149A@chr4@+@186149283^186149593-@186149283^186149566-	sex-biased (female)	2
A3SS@GMEB1@chr1@+@28683740^28690104-@28683740^28690074-	sex-biased (female)	2
A3SS@HGF@chr7@-@81757189^81752247-@81757189^81752262-	sex-biased (female)	2
A3SS@IKZF5@chr10@-@123007026^122998658-@123007026^122998671-	sex-biased (female)	2
A3SS@IL32@chr16@+@3065710^3065784-@3065710^3065781-	sex-biased (female)	2
A3SS@NBPF1@chr1@-@16608508^16595009-@16608508^16595013-	sex-biased (female)	2
A3SS@NDUFV1@chr11@+@67611207^67611522-@67611207^67611477-	sex-biased (female)	2
A3SS@NPRL2@chr3@-@50349665^50349490-@50349665^50349494-	sex-biased (female)	2
A3SS@NR2C1@chr12@-@95031349^95028509-@95031349^95028524-	sex-biased (female)	2
A3SS@PARP2@chr14@+@20354247^20354835-@20354247^20354809-	sex-biased (female)	2
A3SS@PGS1@chr17@+@78404089^78414952-@78404089^78414879-	sex-biased (female)	2
A3SS@PLA2G2A@chr1@-@19978734^19978484-@19978734^19978524-	sex-biased (female)	2
A3SS@PLAGL1@chr6@-@143968907^143966198-@143968907^143966285-	sex-biased (female)	2
A3SS@PLD3@chr19@+@40348724^40365718-@40348724^40365553-	sex-biased (female)	2
A3SS@PLEKHG2@chr19@+@39414195^39414992-@39414195^39414989-	sex-biased (female)	2
A3SS@PODN@chr1@+@53062308^53063469-@53062308^53063370-	sex-biased (female)	2
A3SS@POLK@chr5@+@75590440^75593966-@75590440^75593878-	sex-biased (female)	2
A3SS@PPP1R12A@chr12@-@79807226^79806297-@79807226^79806333-	sex-biased (female)	2
A3SS@RBM26@chr13@-@79366055^79365718-@79366055^79365733-	sex-biased (female)	2
A3SS@RIN3@chr14@+@92659469^92676533-@92659469^92676475-	sex-biased (female)	2
A3SS@SLC4A3@chr2@+@219633457^219633880-@219633457^219633866-	sex-biased (female)	2
A3SS@SNW1@chr14@-@77761114^77755098-@77761114^77755120-	sex-biased (female)	2
A3SS@SPCS2@chr11@+@74965117^74969640-@74965117^74969611-	sex-biased (female)	2
A3SS@TBP@chr6@+@170554463^170556882-@170554463^170556879-	sex-biased (female)	2
A3SS@TFE3@chrX@-@49040455^49039345-@49040455^49039410-	sex-biased (female)	2
A3SS@TNFRSF25@chr1@-@6462863^6462663-@6462863^6462666-	sex-biased (female)	2
A3SS@ZNF496@chr1@-@247329966^247329568-@247329966^247329615-	sex-biased (female)	2
A3SS@ZNF692@chr1@-@248857828^248857436-@248857828^248857497-	sex-biased (female)	2
A3SS@ZNF746@chr7@-@149494204^149494070-@149494204^149494115-	sex-biased (female)	2
A3SS@ZNF846@chr19@-@9763282^9762165-@9763282^9762168-	sex-biased (female)	2
A5SS@ABCB8@chr7@+@151040634^151040828-@151040644^151040828-	sex-biased (female)	2
A5SS@ACTL6A@chr3@+@179562973^179569824-@179563117^179569824-	sex-biased (female)	2
A5SS@AFAP1L2@chr10@-@114297232^114297100-@114297220^114297100-	sex-biased (female)	2
A5SS@BPTF@chr17@+@67945896^67947726-@67946325^67947726-	sex-biased (female)	2
A5SS@CAPZB@chr1@-@19345187^19339617-@19344358^19342864-19342752^19339617-	sex-biased (female)	2
A5SS@CBFB@chr16@+@67029813^67066682-@67030177^67036639-67036755^67066682-	sex-biased (female)	2
A5SS@EBF1@chr5@-@158823200^158796475-@158823176^158796475-	sex-biased (female)	2
A5SS@ENOSF1@chr18@-@712504^706578-@712378^706578-	sex-biased (female)	2
A5SS@FBXO44@chr1@+@11658364^11658533-@11658393^11658533-	sex-biased (female)	2
A5SS@NT5C3B@chr17@-@41835859^41835272-@41835588^41835272-	sex-biased (female)	2
A5SS@POMT1@chr9@+@131504340^131506403-@131504649^131506114-131506220^131506403-	sex-biased (female)	2
A5SS@TUBGCP6@chr22@-@50221275^50220015-@50220251^50220015-	sex-biased (female)	2
A5SS@UPRT@chrX@+@75300965^75303405-@75301015^75303405-	sex-biased (female)	2
A5SS@YDJC@chr22@-@21629602^21629407-@21629543^21629407-	sex-biased (female)	2
A5SS@ZNF598@chr16@-@2000409^2000256-@2000391^2000256-	sex-biased (female)	2
RI@ACADVL@chr17@+@7222865^7223133-@7222864^7222866-7223133^7223135-	sex-biased (female)	2
RI@ACO2@chr22@+@41517631^41518481-@41517630^41517632-41518481^41518483-	sex-biased (female)	2
RI@ACO2@chr22@+@41522987^41523205-@41522986^41522988-41523205^41523207-	sex-biased (female)	2
RI@ADCY6@chr12@-@48777410^48777231-@48777409^48777411-48777231^48777233-	sex-biased (female)	2
RI@AQP3@chr9@-@33443321^33442970-@33443320^33443322-33442970^33442972-	sex-biased (female)	2
RI@ARHGAP27@chr17@-@45396487^45396284-@45396486^45396488-45396284^45396286-	sex-biased (female)	2
RI@BBS2@chr16@-@56497743^56497079-@56497742^56497744-56497079^56497081-	sex-biased (female)	2
RI@BBS2@chr16@-@56502673^56502456-@56502672^56502674-56502456^56502458-	sex-biased (female)	2
RI@BRD2@chr6@+@32976169^32976250-@32976168^32976170-32976250^32976252-	sex-biased (female)	2
RI@COLEC12@chr18@-@334742^333143-@334741^334743-333143^333145-	sex-biased (female)	2
RI@CYP1A1@chr15@-@74720967^74720774-@74720966^74720968-74720774^74720776-	sex-biased (female)	2
RI@DBN1@chr5@-@177467743^177467627-@177467742^177467744-177467627^177467629-	sex-biased (female)	2
RI@ECHDC2@chr1@-@52906519^52905090-@52906518^52906520-52905090^52905092-	sex-biased (female)	2
RI@EFTUD2@chr17@-@44854269^44853635-@44854268^44854270-44853635^44853637-	sex-biased (female)	2
RI@EMD@chrX@+@154380019^154380234-@154380018^154380020-154380234^154380236-	sex-biased (female)	2
RI@GPATCH4@chr1@-@156596387^156596131-@156596386^156596388-156596131^156596133-	sex-biased (female)	2
RI@GPS1@chr17@+@82054049^82054510-@82054048^82054050-82054510^82054512-	sex-biased (female)	2
RI@GPS1@chr17@+@82056974^82057053-@82056973^82056975-82057053^82057055-	sex-biased (female)	2
RI@GTF3C1@chr16@-@27464395^27463592-@27464394^27464396-27463592^27463594-	sex-biased (female)	2
RI@GUCY1A1@chr4@+@155696849^155696935-@155696848^155696850-155696935^155696937-	sex-biased (female)	2
RI@HMBS@chr11@+@119092163^119092404-@119092162^119092164-119092404^119092406-	sex-biased (female)	2
RI@KIAA1671@chr22@+@25174489^25177348-@25174488^25174490-25177348^25177350-	sex-biased (female)	2
RI@LFNG@chr7@+@2525318^2525414-@2525317^2525319-2525414^2525416-	sex-biased (female)	2
RI@MARS1@chr12@+@57512103^57512236-@57512102^57512104-57512236^57512238-	sex-biased (female)	2
RI@MCM9@chr6@-@118913295^118911769-@118913294^118913296-118911769^118911771-	sex-biased (female)	2
RI@MCM9@chr6@-@118922005^118917761-@118922004^118922006-118917761^118917763-	sex-biased (female)	2
RI@MCOLN1@chr19@+@7527628^7527864-@7527627^7527629-7527864^7527866-	sex-biased (female)	2
RI@MINK1@chr17@+@4889763^4890517-@4889762^4889764-4890517^4890519-	sex-biased (female)	2
RI@MYO1G@chr7@-@44964049^44963124-@44964048^44964050-44963124^44963126-	sex-biased (female)	2
RI@NBPF14@chr1@-@148595855^148595752-@148595854^148595856-148595752^148595754-	sex-biased (female)	2
RI@NDRG4@chr16@+@58503903^58504154-@58503902^58503904-58504154^58504156-	sex-biased (female)	2
RI@NDRG4@chr16@+@58507864^58507948-@58507863^58507865-58507948^58507950-	sex-biased (female)	2
RI@NDRG4@chr16@+@58509009^58509154-@58509008^58509010-58509154^58509156-	sex-biased (female)	2
RI@NECAB3@chr20@-@33669687^33669472-@33669686^33669688-33669472^33669474-	sex-biased (female)	2
RI@NIT2@chr3@+@100345678^100346181-@100345677^100345679-100346181^100346183-	sex-biased (female)	2
RI@PDZD11@chrX@-@70289522^70289354-@70289521^70289523-70289354^70289356-	sex-biased (female)	2
RI@PLEKHJ1@chr19@-@2235923^2235828-@2235922^2235924-2235828^2235830-	sex-biased (female)	2
RI@PNKP@chr19@-@49861772^49861695-@49861771^49861773-49861695^49861697-	sex-biased (female)	2
RI@PNKP@chr19@-@49864324^49864236-@49864323^49864325-49864236^49864238-	sex-biased (female)	2
RI@PTGS2@chr1@-@186676467^186676184-@186676466^186676468-186676184^186676186-	sex-biased (female)	2
RI@PWP2@chr21@+@44124727^44126011-@44124726^44124728-44126011^44126013-	sex-biased (female)	2
RI@RBM6@chr3@+@50061547^50061962-@50061546^50061548-50061962^50061964-	sex-biased (female)	2
RI@RIPK1@chr6@+@3083313^3085259-@3083312^3083314-3085259^3085261-	sex-biased (female)	2
RI@SLC25A39@chr17@-@44321434^44321231-@44321433^44321435-44321231^44321233-	sex-biased (female)	2
RI@SPNS2@chr17@+@4536174^4536263-@4536173^4536175-4536263^4536265-	sex-biased (female)	2
RI@SRSF5@chr14@+@69769251^69770467-@69769250^69769252-69770467^69770469-	sex-biased (female)	2
RI@TRAPPC6B@chr14@-@39159450^39158402-@39159449^39159451-39158402^39158404-	sex-biased (female)	2
RI@TRNAU1AP@chr1@+@28560732^28561346-@28560731^28560733-28561346^28561348-	sex-biased (female)	2
RI@TUBB6@chr18@+@12308349^12308687-@12308348^12308350-12308687^12308689-	sex-biased (female)	2
RI@WDR6@chr3@+@49014116^49014210-@49014115^49014117-49014210^49014212-	sex-biased (female)	2
RI@ZMYM2@chr13@+@19993564^19993826-@19993563^19993565-19993826^19993828-	sex-biased (female)	2
SE@ABHD11@chr7@-@73737562^73737110-@73737562^73737360-73737221^73737110-	sex-biased (female)	2
SE@ABHD11@chr7@-@73737562^73737110-@73737562^73737391-73737221^73737110-	sex-biased (female)	2
SE@ABLIM2@chr4@-@8036149^8029776-@8036149^8032680-8032648^8029776-	sex-biased (female)	2
SE@ACAP1@chr17@+@7336787^7341948-@7336787^7337263-7337369^7341948-	sex-biased (female)	2
SE@ADNP@chr20@-@50930826^50904001-@50930826^50928825-50928651^50904001-	sex-biased (female)	2
SE@ADNP@chr20@-@50930826^50904001-@50930826^50928825-50928651^50904849-50904766^50904001-	sex-biased (female)	2
SE@AGAP3@chr7@+@151120145^151122725-@151120145^151120520-151120567^151122725-	sex-biased (female)	2
SE@AGAP3@chr7@+@151120145^151122725-@151120145^151120520-151120745^151122725-	sex-biased (female)	2
SE@AHI1@chr6@-@135318519^135300558-@135318519^135302817-135302712^135301539-135301408^135300558-	sex-biased (female)	2
SE@AHI1@chr6@-@135358132^135318616-@135358132^135323324-135323162^135318616-	sex-biased (female)	2
SE@AKT1@chr14@-@104795484^104792722-@104795484^104793210-104793127^104792722-	sex-biased (female)	2
SE@AKT1@chr14@-@104795484^104792722-@104795484^104793304-104793127^104792722-	sex-biased (female)	2
SE@ANKMY1@chr2@-@240560731^240525849-@240560731^240557352-240557190^240555055-240554866^240553057-240552914^240525849-	sex-biased (female)	2
SE@ANKRD17@chr4@-@73141741^73135265-@73141741^73140283-73139531^73135265-	sex-biased (female)	2
SE@AOAH@chr7@-@36522039^36513380-@36522039^36514590-36514472^36513380-	sex-biased (female)	2
SE@ARID1B@chr6@+@156935576^157084662-@156935576^157036835-157036876^157084662-	sex-biased (female)	2
SE@ARID1B@chr6@+@157174117^157180969-@157174117^157174847-157175005^157180969-	sex-biased (female)	2
SE@ARIH2@chr3@+@48918998^48961612-@48918998^48945136-48945181^48961612-	sex-biased (female)	2
SE@ATXN2@chr12@-@111470108^111457359-@111470108^111461305-111461139^111457359-	sex-biased (female)	2
SE@BAIAP2L2@chr22@-@38086242^38085375-@38086242^38085732-38085686^38085375-	sex-biased (female)	2
SE@BAZ1A@chr14@-@34792775^34786001-@34792775^34786221-34786126^34786001-	sex-biased (female)	2
SE@BCORL1@chrX@+@130022977^130028635-@130022977^130024990-130025379^130028635-	sex-biased (female)	2
SE@BICDL1@chr12@+@120072729^120080887-@120072729^120074443-120074586^120080887-	sex-biased (female)	2
SE@BRD8@chr5@-@138169222^138168078-@138169222^138168688-138168470^138168078-	sex-biased (female)	2
SE@BTN3A3@chr6@+@26443442^26443957-@26443442^26443570-26443659^26443957-	sex-biased (female)	2
SE@BTN3A3@chr6@+@26443442^26443957-@26443442^26443641-26443659^26443957-	sex-biased (female)	2
SE@CAB39L@chr13@-@49433318^49382941-@49433318^49401270-49401133^49382941-	sex-biased (female)	2
SE@CAPRIN2@chr12@-@30734968^30731510-@30734968^30733711-30733629^30731510-	sex-biased (female)	2
SE@CBFB@chr16@+@67029813^67066682-@67029813^67036639-67036755^67046152-67046269^67066682-	sex-biased (female)	2
SE@CC2D2A@chr4@+@15470057^15475915-@15470057^15473222-15473255^15475915-	sex-biased (female)	2
SE@CCDC88B@chr11@+@64353813^64355194-@64353813^64354004-64354170^64355194-	sex-biased (female)	2
SE@CCHCR1@chr6@-@31156731^31151122-@31156731^31154799-31154496^31151122-	sex-biased (female)	2
SE@CCM2@chr7@+@45069961^45073460-@45069961^45070094-45070168^45070389-45071872^45072726-45072783^45073460-	sex-biased (female)	2
SE@CCNL1@chr3@-@157151729^157150381-@157151729^157151591-157151486^157150381-	sex-biased (female)	2
SE@CD47@chr3@-@108050578^108047292-@108050578^108049651-108049619^108047292-	sex-biased (female)	2
SE@CFAP69@chr7@+@90286399^90288234-@90286399^90287502-90287749^90288234-	sex-biased (female)	2
SE@CHCHD4@chr3@-@14124655^14116524-@14124655^14122086-14121917^14116524-	sex-biased (female)	2
SE@CLCN6@chr1@+@11828219^11829196-@11828219^11828458-11828624^11829196-	sex-biased (female)	2
SE@CLEC2D@chr12@+@9669795^9687902-@9669795^9680190-9680251^9680923-9681033^9687902-	sex-biased (female)	2
SE@CLEC2D@chr12@+@9669795^9687902-@9669795^9680923-9681033^9687902-	sex-biased (female)	2
SE@CLEC2D@chr12@+@9692931^9694760-@9692931^9693034-9693115^9693416-9693948^9694760-	sex-biased (female)	2
SE@CLEC2D@chr12@+@9692931^9694760-@9692931^9693034-9693115^9694760-	sex-biased (female)	2
SE@CNOT10@chr3@+@32734976^32759458-@32734976^32737410-32737490^32759458-	sex-biased (female)	2
SE@COG4@chr16@-@70517626^70514509-@70517626^70516040-70515868^70514509-	sex-biased (female)	2
SE@COL16A1@chr1@-@31680042^31679685-@31680042^31679851-31679804^31679685-	sex-biased (female)	2
SE@COL25A1@chr4@-@108859656^108852280-@108859656^108852925-108852902^108852280-	sex-biased (female)	2
SE@DMKN@chr19@-@35507458^35505986-@35507458^35506185-35506126^35505986-	sex-biased (female)	2
SE@DMTF1@chr7@+@87194102^87195031-@87194102^87194684-87194828^87195031-	sex-biased (female)	2
SE@DNALI1@chr1@+@37557748^37561557-@37557748^37559327-37559496^37561557-	sex-biased (female)	2
SE@ENOPH1@chr4@+@82448021^82454722-@82448021^82451043-82451245^82454722-	sex-biased (female)	2
SE@ENTR1@chr9@-@136410090^136407938-@136410090^136409067-136408999^136407938-	sex-biased (female)	2
SE@ERBIN@chr5@+@66054951^66075024-@66054951^66072169-66072291^66075024-	sex-biased (female)	2
SE@ERCC6L2@chr9@+@95941549^95955914-@95941549^95954728-95954922^95955914-	sex-biased (female)	2
SE@ERG@chr21@-@38402557^38392444-@38402557^38400645-38400574^38392444-	sex-biased (female)	2
SE@EXD3@chr9@-@137356268^137354377-@137356268^137354773-137354567^137354377-	sex-biased (female)	2
SE@EXD3@chr9@-@137356268^137354377-@137356268^137354773-137354700^137354377-	sex-biased (female)	2
SE@F8@chrX@-@155026780^154999600-@155026780^155022496-155022410^154999600-	sex-biased (female)	2
SE@FAM193B@chr5@-@177532443^177531521-@177532443^177532200-177531953^177531521-	sex-biased (female)	2
SE@FAT1@chr4@-@186595689^186589220-@186595689^186590403-186590368^186589220-	sex-biased (female)	2
SE@GBP3@chr1@-@89020532^89015414-@89020532^89020211-89020126^89015414-	sex-biased (female)	2
SE@GK@chrX@+@30696683^30700414-@30696683^30697732-30697749^30700414-	sex-biased (female)	2
SE@GNLY@chr2@+@85694470^85695320-@85694470^85694916-85694996^85695320-	sex-biased (female)	2
SE@GPATCH8@chr17@-@44474829^44464544-@44474829^44467114-44467097^44464544-	sex-biased (female)	2
SE@GPATCH8@chr17@-@44474829^44464544-@44474829^44473759-44473725^44467202-44467097^44464544-	sex-biased (female)	2
SE@GPBP1L1@chr1@-@45686412^45661225-@45686412^45685620-45685576^45661225-	sex-biased (female)	2
SE@HEXD@chr17@+@82439713^82440997-@82439713^82440473-82440613^82440997-	sex-biased (female)	2
SE@HMGCR@chr5@+@75354697^75355365-@75354697^75355056-75355214^75355365-	sex-biased (female)	2
SE@HMGN1@chr21@-@39348292^39347483-@39348292^39347952-39347916^39347483-	sex-biased (female)	2
SE@HNRNPA3@chr2@+@177219314^177222060-@177219314^177219408-177221976^177222060-	sex-biased (female)	2
SE@HSPH1@chr13@-@31145563^31141259-@31145563^31143923-31143792^31141259-	sex-biased (female)	2
SE@ICAM2@chr17@-@64020406^64006735-@64020406^64007822-64007741^64006735-	sex-biased (female)	2
SE@IFFO1@chr12@-@6549756^6548825-@6549756^6549484-6549476^6548825-	sex-biased (female)	2
SE@IL18BP@chr11@+@71999019^71999927-@71999019^71999228-71999370^71999617-71999662^71999927-	sex-biased (female)	2
SE@IL18BP@chr11@+@71999019^71999927-@71999019^71999228-71999662^71999927-	sex-biased (female)	2
SE@INPP1@chr2@+@190343961^190360039-@190343961^190359646-190359698^190360039-	sex-biased (female)	2
SE@IP6K1@chr3@-@49786354^49738422-@49786354^49748168-49747818^49738422-	sex-biased (female)	2
SE@IRAG2@chr12@+@25052956^25062820-@25052956^25061592-25061653^25062820-	sex-biased (female)	2
SE@KANSL3@chr2@-@96619359^96613619-@96619359^96615544-96615492^96613619-	sex-biased (female)	2
SE@KCNIP2@chr10@-@101843496^101829199-@101843496^101831167-101831072^101829199-	sex-biased (female)	2
SE@KCNIP2@chr10@-@101843496^101829199-@101843496^101831167-101831072^101829897-101829844^101829199-	sex-biased (female)	2
SE@KCTD17@chr22@+@37059438^37061539-@37059438^37060823-37060922^37061539-	sex-biased (female)	2
SE@KIAA1217@chr10@+@24536893^24544981-@24536893^24542693-24542770^24544981-	sex-biased (female)	2
SE@KLF7@chr2@-@207165467^207124404-@207165467^207149200-207148982^207124404-	sex-biased (female)	2
SE@LARP4@chr12@+@50441643^50454314-@50441643^50453460-50453672^50454314-	sex-biased (female)	2
SE@LRRFIP1@chr2@+@237708630^237719523-@237708630^237714259-237714276^237717762-237717809^237719523-	sex-biased (female)	2
SE@LST1@chr6@+@31587318^31587944-@31587318^31587641-31587733^31587944-	sex-biased (female)	2
SE@LST1@chr6@+@31587318^31588497-@31587318^31587641-31587733^31587944-31587966^31588497-	sex-biased (female)	2
SE@LST1@chr6@+@31587318^31588497-@31587318^31587641-31587733^31588497-	sex-biased (female)	2
SE@LST1@chr6@+@31587318^31588518-@31587318^31587641-31587733^31587944-31587966^31588518-	sex-biased (female)	2
SE@MAGOH@chr1@-@53235577^53228954-@53235577^53233652-53233542^53228954-	sex-biased (female)	2
SE@MAP3K3@chr17@+@63632802^63646034-@63632802^63634709-63634801^63646034-	sex-biased (female)	2
SE@MAP3K7CL@chr21@+@29092581^29149189-@29092581^29109040-29109183^29130795-29130923^29133306-29133414^29149189-	sex-biased (female)	2
SE@MAP3K7CL@chr21@+@29092581^29149189-@29092581^29130795-29130923^29133306-29133414^29149189-	sex-biased (female)	2
SE@MAPK7@chr17@+@19379947^19380608-@19379947^19380484-19380501^19380608-	sex-biased (female)	2
SE@MBNL2@chr13@+@97357635^97391322-@97357635^97366459-97366553^97391322-	sex-biased (female)	2
SE@MORF4L2@chrX@-@103685171^103678600-@103685171^103684729-103684681^103678600-	sex-biased (female)	2
SE@MPI@chr15@+@74890089^74891379-@74890089^74890527-74890654^74890979-74891035^74891379-	sex-biased (female)	2
SE@MTHFD2L@chr4@+@74158281^74174506-@74158281^74160055-74160088^74174506-	sex-biased (female)	2
SE@MTRF1@chr13@-@41260493^41254620-@41260493^41257796-41257673^41254620-	sex-biased (female)	2
SE@MTRF1@chr13@-@41260493^41254620-@41260493^41257797-41257673^41254620-	sex-biased (female)	2
SE@NCOA1@chr2@+@24564430^24643966-@24564430^24584476-24584560^24643966-	sex-biased (female)	2
SE@NEDD1@chr12@+@96907856^96917621-@96907856^96909752-96909895^96912723-96912817^96917621-	sex-biased (female)	2
SE@NFASC@chr1@+@204997406^205009557-@204997406^205001170-205001286^205002596-205002748^205009557-	sex-biased (female)	2
SE@NFIB@chr9@-@14120440^14102510-@14120440^14116346-14116208^14113081-14112999^14102510-	sex-biased (female)	2
SE@NIPSNAP3B@chr9@+@104770998^104772822-@104770998^104771234-104771316^104772822-	sex-biased (female)	2
SE@NPNT@chr4@+@105898001^105927336-@105898001^105912188-105912238^105927336-	sex-biased (female)	2
SE@NT5C2@chr10@-@103139406^103106706-@103139406^103111805-103111745^103106706-	sex-biased (female)	2
SE@NTPCR@chr1@+@232956443^232978163-@232956443^232969909-232970118^232978163-	sex-biased (female)	2
SE@NUDT22@chr11@+@64227132^64229247-@64227132^64227401-64227493^64227568-64227666^64229247-	sex-biased (female)	2
SE@NUMB@chr14@-@73287110^73282505-@73287110^73284374-73284081^73282505-	sex-biased (female)	2
SE@PABPC1L@chr20@+@44938191^44958337-@44938191^44938674-44938748^44958337-	sex-biased (female)	2
SE@PAPLN@chr14@+@73261294^73263645-@73261294^73262350-73262827^73263645-	sex-biased (female)	2
SE@PAPLN@chr14@+@73261294^73263645-@73261294^73262398-73262827^73263645-	sex-biased (female)	2
SE@PAPOLG@chr2@+@60770511^60775034-@60770511^60771519-60771630^60775034-	sex-biased (female)	2
SE@PATJ@chr1@+@62148390^62160908-@62148390^62153358-62153481^62160908-	sex-biased (female)	2
SE@PCDH1@chr5@-@141857252^141854436-@141857252^141856262-141856224^141854436-	sex-biased (female)	2
SE@PCNX1@chr14@+@70978648^71009634-@70978648^70988567-70988699^70995741-70995843^71009634-	sex-biased (female)	2
SE@PCNX1@chr14@+@70978648^71009634-@70978648^70988567-70988699^70995741-70995925^71009634-	sex-biased (female)	2
SE@PDLIM5@chr4@+@94576034^94585565-@94576034^94584986-94585003^94585565-	sex-biased (female)	2
SE@PHF20@chr20@+@35772079^35801491-@35772079^35800094-35800173^35801491-	sex-biased (female)	2
SE@PHKB@chr16@+@47461426^47497399-@47461426^47462341-47462452^47463882-47463993^47497399-	sex-biased (female)	2
SE@PIGB@chr15@+@55319413^55327531-@55319413^55320275-55320410^55321270-55321390^55327531-	sex-biased (female)	2
SE@PIGB@chr15@+@55319413^55327531-@55319413^55320275-55320410^55321273-55321390^55324780-55324834^55327531-	sex-biased (female)	2
SE@PIGB@chr15@+@55319413^55327531-@55319413^55320275-55320410^55321300-55321390^55327531-	sex-biased (female)	2
SE@PLD3@chr19@+@40348724^40365718-@40348724^40365553-40365585^40365718-	sex-biased (female)	2
SE@PLXNB1@chr3@-@48420665^48419674-@48420665^48420257-48420224^48419674-	sex-biased (female)	2
SE@POLR1D@chr13@+@27621140^27648379-@27621140^27621337-27621437^27648379-	sex-biased (female)	2
SE@POMT1@chr9@+@131504340^131506403-@131504340^131504454-131504649^131506114-131506220^131506403-	sex-biased (female)	2
SE@POMT1@chr9@+@131504340^131506403-@131504340^131506114-131506220^131506403-	sex-biased (female)	2
SE@POMT1@chr9@+@131504340^131506403-@131504340^131506183-131506220^131506403-	sex-biased (female)	2
SE@PPIE@chr1@+@39753052^39763689-@39753052^39762517-39762651^39763689-	sex-biased (female)	2
SE@PPIP5K2@chr5@+@103184744^103190842-@103184744^103186320-103186439^103187314-103187376^103189167-103189226^103190842-	sex-biased (female)	2
SE@PPIP5K2@chr5@+@103184744^103190842-@103184744^103186320-103186439^103187314-103187376^103190842-	sex-biased (female)	2
SE@PPM1A@chr14@+@60249677^60282684-@60249677^60250380-60250481^60282684-	sex-biased (female)	2
SE@PPP2R2D@chr10@+@131940694^131944095-@131940694^131943968-131943997^131944095-	sex-biased (female)	2
SE@PRKAA1@chr5@-@40775410^40771863-@40775410^40774972-40774928^40771863-	sex-biased (female)	2
SE@PUF60@chr8@-@143821597^143818534-@143821597^143820716-143820666^143818534-	sex-biased (female)	2
SE@RGPD5@chr2@+@109808404^109813460-@109808404^109808750-109808895^109813460-	sex-biased (female)	2
SE@RGS14@chr5@+@177371396^177371873-@177371396^177371475-177371589^177371873-	sex-biased (female)	2
SE@RNF212@chr4@-@1058321^1056503-@1058321^1057004-1056838^1056503-	sex-biased (female)	2
SE@RPS24@chr10@+@78037304^78040615-@78037304^78037439-78037441^78040204-78040225^78040615-	sex-biased (female)	2
SE@RPS24@chr10@+@78037304^78040615-@78037304^78037439-78040225^78040615-	sex-biased (female)	2
SE@SAFB@chr19@+@5648043^5649926-@5648043^5648989-5649499^5649926-	sex-biased (female)	2
SE@SEC31A@chr4@-@82842140^82829058-@82842140^82830975-82830937^82829058-	sex-biased (female)	2
SE@SEMA3F@chr3@+@50174350^50176768-@50174350^50175096-50175188^50176768-	sex-biased (female)	2
SE@SFXN4@chr10@-@119162340^119160969-@119162340^119162160-119162139^119161081-119161055^119160969-	sex-biased (female)	2
SE@SIPA1L1@chr14@+@71702505^71705222-@71702505^71704721-71704783^71705222-	sex-biased (female)	2
SE@SLC30A5@chr5@+@69094338^69103062-@69094338^69100807-69100929^69103062-	sex-biased (female)	2
SE@SLC38A6@chr14@+@61052135^61078830-@61052135^61052349-61052985^61073848-61073941^61078830-	sex-biased (female)	2
SE@SLC7A6@chr16@+@68266721^68274691-@68266721^68273822-68273904^68274691-	sex-biased (female)	2
SE@SLC9B2@chr4@-@103031700^103026591-@103031700^103028883-103028747^103026591-	sex-biased (female)	2
SE@SMAD2@chr18@-@47930361^47896809-@47930361^47920169-47920072^47896809-	sex-biased (female)	2
SE@SPRTN@chr1@+@231339868^231351304-@231339868^231344623-231344714^231347797-231347925^231351304-	sex-biased (female)	2
SE@ST7L@chr1@-@112541951^112526111-@112541951^112540872-112540779^112526111-	sex-biased (female)	2
SE@ST7L@chr1@-@112541951^112526111-@112541951^112540872-112540779^112539275-112539159^112526111-	sex-biased (female)	2
SE@SVIL@chr10@-@29535989^29532172-@29535989^29533458-29532529^29532172-	sex-biased (female)	2
SE@TAB3@chrX@-@30846551^30834152-@30846551^30843049-30842966^30834152-	sex-biased (female)	2
SE@TBL1XR1@chr3@-@177197121^177065022-@177197121^177098541-177098466^177065022-	sex-biased (female)	2
SE@TEPSIN@chr17@-@81238514^81237459-@81238514^81237660-81237551^81237459-	sex-biased (female)	2
SE@TGFBR2@chr3@+@30606977^30644747-@30606977^30623199-30623273^30644747-	sex-biased (female)	2
SE@TIAL1@chr10@-@119581922^119580010-@119581922^119580846-119580471^119580010-	sex-biased (female)	2
SE@TIRAP@chr11@+@126283153^126290803-@126283153^126288443-126288573^126289665-126289833^126290462-126290585^126290803-	sex-biased (female)	2
SE@TIRAP@chr11@+@126283153^126290803-@126283153^126289665-126289817^126290462-126290585^126290803-	sex-biased (female)	2
SE@TIRAP@chr11@+@126283153^126290803-@126283153^126289665-126289833^126290462-126290585^126290803-	sex-biased (female)	2
SE@TIRAP@chr11@+@126283153^126290803-@126283153^126290462-126290585^126290803-	sex-biased (female)	2
SE@TM2D3@chr15@-@101652271^101650161-@101652271^101651773-101651696^101650161-	sex-biased (female)	2
SE@TNNT3@chr11@+@1925116^1929810-@1925116^1925256-1925276^1926470-1926481^1926695-1926709^1929068-1929143^1929810-	sex-biased (female)	2
SE@TNNT3@chr11@+@1925116^1929810-@1925116^1925256-1925276^1926470-1926481^1926695-1926709^1929120-1929143^1929810-	sex-biased (female)	2
SE@TNNT3@chr11@+@1925116^1929810-@1925116^1925256-1925276^1926470-1926481^1926695-1926709^1929810-	sex-biased (female)	2
SE@TPM1@chr15@+@63062645^63069870-@63062645^63065896-63066085^63069870-	sex-biased (female)	2
SE@TRAPPC13@chr5@+@65652545^65658368-@65652545^65655636-65655653^65658368-	sex-biased (female)	2
SE@TRIM14@chr9@-@98118982^98109984-@98118982^98110234-98110069^98109984-	sex-biased (female)	2
SE@TRIM33@chr1@-@114421436^114410316-@114421436^114420451-114420380^114410316-	sex-biased (female)	2
SE@TRIO@chr5@+@14504593^14507880-@14504593^14507122-14507260^14507880-	sex-biased (female)	2
SE@TRNAU1AP@chr1@+@28560732^28561346-@28560732^28561113-28561260^28561346-	sex-biased (female)	2
SE@TRPT1@chr11@-@64226050^64225580-@64226050^64225869-64225786^64225580-	sex-biased (female)	2
SE@U2SURP@chr3@+@143053794^143056312-@143053794^143054943-143055119^143056312-	sex-biased (female)	2
SE@USP15@chr12@+@62325933^62355331-@62325933^62349221-62349307^62355331-	sex-biased (female)	2
SE@VEGFA@chr6@+@43778918^43784541-@43778918^43780732-43780803^43784541-	sex-biased (female)	2
SE@VEZT@chr12@+@95252071^95262906-@95252071^95257150-95257239^95262906-	sex-biased (female)	2
SE@VEZT@chr12@+@95252071^95262906-@95252071^95257154-95257239^95262906-	sex-biased (female)	2
SE@VEZT@chr12@+@95252071^95266357-@95252071^95256550-95256622^95257150-95257239^95262906-95263081^95263746-95263797^95266357-	sex-biased (female)	2
SE@VEZT@chr12@+@95252071^95266357-@95252071^95256550-95256622^95266357-	sex-biased (female)	2
SE@VEZT@chr12@+@95252071^95266357-@95252071^95257150-95257239^95258245-95258282^95262906-95263081^95266357-	sex-biased (female)	2
SE@VEZT@chr12@+@95252071^95266357-@95252071^95257150-95257239^95258245-95258287^95262906-95263081^95266357-	sex-biased (female)	2
SE@VRK3@chr19@-@50016024^50007826-@50016024^50009289-50009236^50007826-	sex-biased (female)	2
SE@VRK3@chr19@-@50016024^50007826-@50016024^50009385-50009236^50007826-	sex-biased (female)	2
SE@VRK3@chr19@-@50016024^50007826-@50016024^50015793-50015732^50009385-50009236^50007826-	sex-biased (female)	2
SE@WARS1@chr14@-@100375283^100361921-@100375283^100374244-100374136^100369258-100369087^100365576-100365475^100361921-	sex-biased (female)	2
SE@WARS1@chr14@-@100375283^100369258-@100375283^100374149-100374136^100369258-	sex-biased (female)	2
SE@WARS1@chr14@-@100375283^100369258-@100375283^100374179-100374136^100369258-	sex-biased (female)	2
SE@WARS1@chr14@-@100375283^100369258-@100375283^100374220-100374136^100369258-	sex-biased (female)	2
SE@WARS1@chr14@-@100375283^100369258-@100375283^100374265-100374136^100369258-	sex-biased (female)	2
SE@ZCCHC17@chr1@+@31310164^31319109-@31310164^31318167-31318236^31319109-	sex-biased (female)	2
SE@ZCCHC8@chr12@-@122489386^122482695-@122489386^122483344-122483279^122482695-	sex-biased (female)	2
SE@ZCCHC8@chr12@-@122489386^122482695-@122489386^122483563-122483460^122483344-122483279^122482695-	sex-biased (female)	2
SE@ZCWPW1@chr7@-@100403694^100401336-@100403694^100402576-100402516^100401336-	sex-biased (female)	2
SE@ZCWPW1@chr7@-@100403694^100401336-@100403694^100402576-100402516^100402041-100401889^100401336-	sex-biased (female)	2
SE@ZNF248@chr10@-@37857185^37856337-@37857185^37856532-37856435^37856337-	sex-biased (female)	2
SE@ZNF331@chr19@+@53555908^53569304-@53555908^53563763-53563792^53569304-	sex-biased (female)	2
SE@ZNF431@chr19@+@21167666^21182623-@21167666^21175453-21175474^21182623-	sex-biased (female)	2
SE@ZNF558@chr19@-@8831318^8825108-@8831318^8830891-8830770^8825108-	sex-biased (female)	2
SE@ZNF584@chr19@+@58409165^58415524-@58409165^58409965-58410091^58415524-	sex-biased (female)	2
A3SS@ARID1A@chr1@+@26772632^26772815-@26772632^26772812-	sex-biased (male)	2
A3SS@ATXN2@chr12@-@111513357^111510444-@111513357^111510582-	sex-biased (male)	2
A3SS@CAPRIN2@chr12@-@30716508^30715081-@30716508^30715141-	sex-biased (male)	2
A3SS@CDC27@chr17@-@47154672^47151918-@47154672^47151936-	sex-biased (male)	2
A3SS@CTSL@chr9@+@87726253^87728034-@87726253^87728027-	sex-biased (male)	2
A3SS@DISP1@chr1@+@222991647^222992013-@222991647^222991855-	sex-biased (male)	2
A3SS@IFI27@chr14@+@94110978^94111659-@94110978^94111625-	sex-biased (male)	2
A3SS@MINK1@chr17@+@4889763^4890517-@4889763^4890222-	sex-biased (male)	2
A3SS@MOV10@chr1@+@112698789^112699685-@112698789^112699458-	sex-biased (male)	2
A3SS@MT1G@chr16@-@56667966^56667377-@56667966^56667380-	sex-biased (male)	2
A3SS@NUDT4@chr12@+@93395533^93398771-@93395533^93398768-	sex-biased (male)	2
A3SS@P3H3@chr12@+@6833644^6833746-@6833644^6833742-	sex-biased (male)	2
A3SS@RHOT2@chr16@+@671000^671115-@671000^671083-	sex-biased (male)	2
A3SS@RPS24@chr10@+@78037304^78037965-78037982^78040204-@78037304^78037439-	sex-biased (male)	2
A3SS@RPS24@chr10@+@78037304^78037965-78037993^78040204-@78037304^78037439-	sex-biased (male)	2
A3SS@RXRB@chr6@-@33195570^33195454-@33195570^33195466-	sex-biased (male)	2
A3SS@SLC37A3@chr7@-@140352062^140351451-@140352062^140351969-	sex-biased (male)	2
A3SS@TAF1C@chr16@-@84186901^84184899-@84186901^84184989-	sex-biased (male)	2
A3SS@TMEM134@chr11@-@67468017^67467563-@67468017^67467590-	sex-biased (male)	2
A3SS@TSC2@chr16@+@2076585^2079035-@2076585^2079032-	sex-biased (male)	2
A3SS@ZNF106@chr15@-@42442073^42439552-@42442073^42439813-	sex-biased (male)	2
A5SS@ATR@chr3@-@142497134^142496520-@142497013^142496520-	sex-biased (male)	2
A5SS@CEP170@chr1@-@243142316^243140107-@243142286^243140107-	sex-biased (male)	2
A5SS@CYP4F12@chr19@+@15678329^15680244-@15678405^15680244-	sex-biased (male)	2
A5SS@GALE@chr1@-@23796697^23796265-@23796509^23796265-	sex-biased (male)	2
A5SS@PABPC4@chr1@-@39564471^39563741-@39564423^39563741-	sex-biased (male)	2
A5SS@POLE@chr12@-@132641647^132639298-@132641018^132639298-	sex-biased (male)	2
A5SS@PRMT1@chr19@+@49679925^49680487-@49679929^49680140-49680238^49680487-	sex-biased (male)	2
A5SS@PRMT1@chr19@+@49679925^49680487-@49679929^49680140-49680253^49680487-	sex-biased (male)	2
A5SS@RNF146@chr6@+@127267044^127280231-@127267095^127280231-	sex-biased (male)	2
A5SS@RPL7L1@chr6@+@42880966^42883451-@42881082^42883451-	sex-biased (male)	2
A5SS@SPEG@chr2@+@219444984^219447974-@219445161^219447974-	sex-biased (male)	2
A5SS@TATDN1@chr8@-@124518818^124516030-@124518742^124516030-	sex-biased (male)	2
A5SS@TBL2@chr7@-@73573961^73573471-@73573938^73573471-	sex-biased (male)	2
A5SS@TJP1@chr15@-@29704222^29701689-@29704162^29701689-	sex-biased (male)	2
A5SS@TMEM175@chr4@+@948154^950421-@948615^950421-	sex-biased (male)	2
A5SS@TSC1@chr9@-@132901631^132900837-@132901589^132900837-	sex-biased (male)	2
A5SS@UHRF2@chr9@+@6497268^6498018-@6497360^6498018-	sex-biased (male)	2
A5SS@ZMYND8@chr20@-@47238896^47236516-@47238758^47236516-	sex-biased (male)	2
A5SS@ZNF558@chr19@-@8822003^8821306-@8821442^8821306-	sex-biased (male)	2
RI@ABCA2@chr9@-@137011634^137011554-@137011633^137011635-137011554^137011556-	sex-biased (male)	2
RI@ADAR@chr1@-@154585753^154585344-@154585752^154585754-154585344^154585346-	sex-biased (male)	2
RI@ANKZF1@chr2@+@219234288^219234826-@219234287^219234289-219234826^219234828-	sex-biased (male)	2
RI@AR@chrX@+@67725636^67728674-@67725635^67725637-67728674^67728676-	sex-biased (male)	2
RI@ATG13@chr11@+@46668576^46668794-@46668575^46668577-46668794^46668796-	sex-biased (male)	2
RI@BCO2@chr11@+@112193994^112194653-@112193993^112193995-112194653^112194655-	sex-biased (male)	2
RI@BICD2@chr9@-@92715253^92713461-@92715252^92715254-92713461^92713463-	sex-biased (male)	2
RI@BRF1@chr14@-@105212113^105211293-@105212112^105212114-105211293^105211295-	sex-biased (male)	2
RI@BRF1@chr14@-@105220069^105219232-@105220068^105220070-105219232^105219234-	sex-biased (male)	2
RI@CASP2@chr7@+@143300294^143303784-@143300293^143300295-143303784^143303786-	sex-biased (male)	2
RI@CCL4L2@chr17@+@36211890^36212482-@36211889^36211891-36212482^36212484-	sex-biased (male)	2
RI@CD163@chr12@-@7481161^7479996-@7481160^7481162-7479996^7479998-	sex-biased (male)	2
RI@CD82@chr11@+@44605182^44605355-@44605181^44605183-44605355^44605357-	sex-biased (male)	2
RI@CFAP69@chr7@+@90300059^90304744-@90300058^90300060-90304744^90304746-	sex-biased (male)	2
RI@CLPP@chr19@+@6361940^6362446-@6361939^6361941-6362446^6362448-	sex-biased (male)	2
RI@COQ8B@chr19@-@40705325^40705181-@40705324^40705326-40705181^40705183-	sex-biased (male)	2
RI@CSF3@chr17@+@40016340^40016485-@40016339^40016341-40016485^40016487-	sex-biased (male)	2
RI@CTSG@chr14@-@24575265^24574810-@24575264^24575266-24574810^24574812-	sex-biased (male)	2
RI@CTSK@chr1@-@150799544^150799273-@150799543^150799545-150799273^150799275-	sex-biased (male)	2
RI@CTSK@chr1@-@150805861^150804239-@150805860^150805862-150804239^150804241-	sex-biased (male)	2
RI@CTSK@chr1@-@150806686^150806224-@150806685^150806687-150806224^150806226-	sex-biased (male)	2
RI@DDX39A@chr19@-@14410216^14409873-@14410215^14410217-14409873^14409875-	sex-biased (male)	2
RI@DDX3X@chrX@+@41345324^41345404-@41345323^41345325-41345404^41345406-	sex-biased (male)	2
RI@DGAT1@chr8@-@144317187^144317109-@144317186^144317188-144317109^144317111-	sex-biased (male)	2
RI@DGKZ@chr11@+@46378500^46378991-@46378499^46378501-46378991^46378993-	sex-biased (male)	2
RI@DGKZ@chr11@+@46379236^46379469-@46379235^46379237-46379469^46379471-	sex-biased (male)	2
RI@DOCK9@chr13@-@98860405^98856031-@98860404^98860406-98856031^98856033-	sex-biased (male)	2
RI@EFHC1@chr6@+@52452837^52454095-@52452836^52452838-52454095^52454097-	sex-biased (male)	2
RI@EPS8L1@chr19@+@55082180^55082275-@55082179^55082181-55082275^55082277-	sex-biased (male)	2
RI@EPS8L1@chr19@+@55083519^55083616-@55083518^55083520-55083616^55083618-	sex-biased (male)	2
RI@FAAH@chr1@+@46405794^46406038-@46405793^46405795-46406038^46406040-	sex-biased (male)	2
RI@FAM107A@chr3@-@58567208^58566695-@58567207^58567209-58566695^58566697-	sex-biased (male)	2
RI@FCSK@chr16@+@70478650^70479180-@70478649^70478651-70479180^70479182-	sex-biased (male)	2
RI@FMNL1@chr17@+@45244025^45244176-@45244024^45244026-45244176^45244178-	sex-biased (male)	2
RI@GALE@chr1@-@23798615^23798230-@23798614^23798616-23798230^23798232-	sex-biased (male)	2
RI@GPAA1@chr8@+@144083500^144083714-@144083499^144083501-144083714^144083716-	sex-biased (male)	2
RI@GPAA1@chr8@+@144085479^144085573-@144085478^144085480-144085573^144085575-	sex-biased (male)	2
RI@HEXD@chr17@+@82436738^82437168-@82436737^82436739-82437168^82437170-	sex-biased (male)	2
RI@HIP1R@chr12@+@122860077^122860148-@122860076^122860078-122860148^122860150-	sex-biased (male)	2
RI@HIP1R@chr12@+@122860523^122860679-@122860522^122860524-122860679^122860681-	sex-biased (male)	2
RI@HMGA1@chr6@+@34236963^34237204-@34236962^34236964-34237204^34237206-	sex-biased (male)	2
RI@HNRNPH1@chr5@-@179621242^179621035-@179621241^179621243-179621035^179621037-	sex-biased (male)	2
RI@HSF1@chr8@+@144309896^144311174-@144309895^144309897-144311174^144311176-	sex-biased (male)	2
RI@HSPH1@chr13@-@31137368^31137117-@31137367^31137369-31137117^31137119-	sex-biased (male)	2
RI@IDE@chr10@-@92508113^92507666-@92508112^92508114-92507666^92507668-	sex-biased (male)	2
RI@ILKAP@chr2@-@238194805^238194331-@238194804^238194806-238194331^238194333-	sex-biased (male)	2
RI@KLHDC2@chr14@+@49779675^49779748-@49779674^49779676-49779748^49779750-	sex-biased (male)	2
RI@KLHL21@chr1@-@6595485^6593658-@6595484^6595486-6593658^6593660-	sex-biased (male)	2
RI@KRT5@chr12@-@52518103^52517992-@52518102^52518104-52517992^52517994-	sex-biased (male)	2
RI@LAIR1@chr19@-@54356356^54356267-@54356355^54356357-54356267^54356269-	sex-biased (male)	2
RI@LILRB2@chr19@-@54277550^54276929-@54277549^54277551-54276929^54276931-	sex-biased (male)	2
RI@LUC7L@chr16@-@228333^227336-@228332^228334-227336^227338-	sex-biased (male)	2
RI@MAP3K7@chr6@-@90552049^90550549-@90552048^90552050-90550549^90550551-	sex-biased (male)	2
RI@MCM7@chr7@-@100099279^100099203-@100099278^100099280-100099203^100099205-	sex-biased (male)	2
RI@MCRIP2@chr16@+@647544^647783-@647543^647545-647783^647785-	sex-biased (male)	2
RI@MFN1@chr3@+@179378443^179378585-@179378442^179378444-179378585^179378587-	sex-biased (male)	2
RI@MOB2@chr11@-@1480725^1480486-@1480724^1480726-1480486^1480488-	sex-biased (male)	2
RI@MYO18A@chr17@-@29097223^29096915-@29097222^29097224-29096915^29096917-	sex-biased (male)	2
RI@NCAPG2@chr7@-@158655339^158655258-@158655338^158655340-158655258^158655260-	sex-biased (male)	2
RI@NDUFV1@chr11@+@67608478^67608552-@67608477^67608479-67608552^67608554-	sex-biased (male)	2
RI@NFATC4@chr14@+@24376878^24377638-@24376877^24376879-24377638^24377640-	sex-biased (male)	2
RI@NFKB2@chr10@+@102396489^102396725-@102396488^102396490-102396725^102396727-	sex-biased (male)	2
RI@NONO@chrX@+@71297047^71297377-@71297046^71297048-71297377^71297379-	sex-biased (male)	2
RI@NONO@chrX@+@71297461^71297836-@71297460^71297462-71297836^71297838-	sex-biased (male)	2
RI@NONO@chrX@+@71297938^71298469-@71297937^71297939-71298469^71298471-	sex-biased (male)	2
RI@NPEPPS@chr17@+@47579511^47582742-@47579510^47579512-47582742^47582744-	sex-biased (male)	2
RI@PARP1@chr1@-@226386326^226385680-@226386325^226386327-226385680^226385682-	sex-biased (male)	2
RI@PCSK7@chr11@-@117224078^117223308-@117224077^117224079-117223308^117223310-	sex-biased (male)	2
RI@PHB2@chr12@-@6970417^6970280-@6970416^6970418-6970280^6970282-	sex-biased (male)	2
RI@PIAS3@chr1@-@145856589^145856431-@145856588^145856590-145856431^145856433-	sex-biased (male)	2
RI@PIGO@chr9@-@35092543^35091291-@35092542^35092544-35091291^35091293-	sex-biased (male)	2
RI@PLK2@chr5@-@58458399^58458171-@58458398^58458400-58458171^58458173-	sex-biased (male)	2
RI@PLK3@chr1@+@44803153^44803268-@44803152^44803154-44803268^44803270-	sex-biased (male)	2
RI@PPP2R1B@chr11@-@111742523^111742144-@111742522^111742524-111742144^111742146-	sex-biased (male)	2
RI@PRKRA@chr2@-@178445426^178444500-@178445425^178445427-178444500^178444502-	sex-biased (male)	2
RI@PSMB8@chr6@-@32842942^32842783-@32842941^32842943-32842783^32842785-	sex-biased (male)	2
RI@PTPRM@chr18@+@8376597^8378265-@8376596^8376598-8378265^8378267-	sex-biased (male)	2
RI@QARS1@chr3@-@49099994^49099853-@49099993^49099995-49099853^49099855-	sex-biased (male)	2
RI@QARS1@chr3@-@49103631^49103409-@49103630^49103632-49103409^49103411-	sex-biased (male)	2
RI@RELB@chr19@+@45034312^45034451-@45034311^45034313-45034451^45034453-	sex-biased (male)	2
RI@RPS24@chr10@+@78037441^78040204-@78037440^78037442-78040204^78040206-	sex-biased (male)	2
RI@SAMHD1@chr20@-@36912461^36911333-@36912460^36912462-36911333^36911335-	sex-biased (male)	2
RI@SCART1@chr10@+@133458656^133459021-@133458655^133458657-133459021^133459023-	sex-biased (male)	2
RI@SCRN2@chr17@-@47838270^47838002-@47838269^47838271-47838002^47838004-	sex-biased (male)	2
RI@SELENBP1@chr1@-@151369442^151369189-@151369441^151369443-151369189^151369191-	sex-biased (male)	2
RI@SELENBP1@chr1@-@151369713^151369554-@151369712^151369714-151369554^151369556-	sex-biased (male)	2
RI@SGTA@chr19@-@2759257^2757782-@2759256^2759258-2757782^2757784-	sex-biased (male)	2
RI@SLC44A2@chr19@+@10634887^10634974-@10634886^10634888-10634974^10634976-	sex-biased (male)	2
RI@SMARCD3@chr7@-@151241492^151240522-@151241491^151241493-151240522^151240524-	sex-biased (male)	2
RI@SMARCD3@chr7@-@151242481^151242232-@151242480^151242482-151242232^151242234-	sex-biased (male)	2
RI@SPG7@chr16@+@89529579^89530683-@89529578^89529580-89530683^89530685-	sex-biased (male)	2
RI@SRRM1@chr1@+@24646789^24648859-@24646788^24646790-24648859^24648861-	sex-biased (male)	2
RI@SUN2@chr22@-@38751210^38751035-@38751209^38751211-38751035^38751037-	sex-biased (male)	2
RI@TNFAIP2@chr14@+@103129854^103130002-@103129853^103129855-103130002^103130004-	sex-biased (male)	2
RI@TNXB@chr6@-@32042951^32042831-@32042950^32042952-32042831^32042833-	sex-biased (male)	2
RI@TOX4@chr14@+@21487693^21488590-@21487692^21487694-21488590^21488592-	sex-biased (male)	2
RI@WDR11@chr10@+@120906021^120906776-@120906020^120906022-120906776^120906778-	sex-biased (male)	2
RI@WDR24@chr16@-@686068^685990-@686067^686069-685990^685992-	sex-biased (male)	2
RI@YBX3@chr12@-@10704060^10702134-@10704059^10704061-10702134^10702136-	sex-biased (male)	2
RI@ZDHHC5@chr11@+@57690203^57690335-@57690202^57690204-57690335^57690337-	sex-biased (male)	2
RI@ZSWIM8@chr10@+@73794330^73794541-@73794329^73794331-73794541^73794543-	sex-biased (male)	2
RI@ZSWIM8@chr10@+@73794330^73794556-@73794329^73794331-73794556^73794558-	sex-biased (male)	2
SE@ABRAXAS1@chr4@-@83484986^83482244-@83484986^83484166-83483992^83482244-	sex-biased (male)	2
SE@AC006254.1@chr3@-@52833114^52830670-@52833114^52831478-52831408^52830670-	sex-biased (male)	2
SE@ACADM@chr1@+@75732922^75734791-@75732922^75733051-75733149^75733528-75733628^75734791-	sex-biased (male)	2
SE@ACADM@chr1@+@75732922^75734791-@75732922^75733528-75733628^75734791-	sex-biased (male)	2
SE@ACTR3B@chr7@+@152801731^152814550-@152801731^152811697-152811733^152814550-	sex-biased (male)	2
SE@ADPGK@chr15@-@72783459^72760527-@72783459^72775097-72774872^72760527-	sex-biased (male)	2
SE@AGAP1@chr2@+@235908906^235968462-@235908906^235930765-235930923^235968462-	sex-biased (male)	2
SE@AGO3@chr1@+@35973511^36004341-@35973511^35982621-35982712^35984470-35984548^36004341-	sex-biased (male)	2
SE@AL049629.2@chr11@-@33710206^33698514-@33710206^33702737-33702668^33698514-	sex-biased (male)	2
SE@ALKBH2@chr12@-@109092507^109088512-@109092507^109090207-109090009^109088512-	sex-biased (male)	2
SE@ANKDD1A@chr15@+@64949972^64957103-@64949972^64950954-64951233^64957103-	sex-biased (male)	2
SE@ANKRD37@chr4@+@185396424^185397150-@185396424^185396832-185396950^185397150-	sex-biased (male)	2
SE@ANKRD9@chr14@-@102509529^102508549-@102509529^102508846-102508641^102508549-	sex-biased (male)	2
SE@ANXA2@chr15@-@60397943^60364523-@60397943^60396427-60396151^60386086-60386028^60364523-	sex-biased (male)	2
SE@APBB3@chr5@-@140562100^140561701-@140562100^140561849-140561844^140561701-	sex-biased (male)	2
SE@APBB3@chr5@-@140562100^140561701-@140562100^140561995-140561844^140561701-	sex-biased (male)	2
SE@AQP7@chr9@-@33395078^33386541-@33395078^33394277-33394127^33386541-	sex-biased (male)	2
SE@ARHGAP23@chr17@+@38472006^38477828-@38472006^38477579-38477705^38477828-	sex-biased (male)	2
SE@ARHGAP23@chr17@+@38497826^38500597-@38497826^38498414-38498510^38498932-38498954^38500597-	sex-biased (male)	2
SE@ARHGAP23@chr17@+@38497826^38500597-@38497826^38498414-38498510^38500597-	sex-biased (male)	2
SE@ARPC2@chr2@+@218235044^218238664-@218235044^218236369-218236733^218238664-	sex-biased (male)	2
SE@ASCC2@chr22@-@29838178^29825257-@29838178^29832342-29832245^29825257-	sex-biased (male)	2
SE@ASXL1@chr20@+@32369123^32428128-@32369123^32371778-32371874^32428128-	sex-biased (male)	2
SE@ATG16L2@chr11@+@72822961^72824060-@72822961^72823544-72823797^72824060-	sex-biased (male)	2
SE@ATG16L2@chr11@+@72822961^72824060-@72822961^72823766-72823797^72824060-	sex-biased (male)	2
SE@BAG6@chr6@-@31640199^31639226-@31640199^31639646-31639500^31639226-	sex-biased (male)	2
SE@BOLA3@chr2@-@74145189^74135658-@74145189^74142360-74142272^74135658-	sex-biased (male)	2
SE@C1orf159@chr1@-@1084353^1082987-@1084353^1084086-1083915^1082987-	sex-biased (male)	2
SE@CASP10@chr2@+@201195948^201208075-@201195948^201203730-201203766^201205882-201205973^201208075-	sex-biased (male)	2
SE@CASP3@chr4@-@184649395^184638468-@184649395^184648631-184648465^184638468-	sex-biased (male)	2
SE@CASP3@chr4@-@184649395^184638468-@184649395^184648631-184648503^184638468-	sex-biased (male)	2
SE@CCDC66@chr3@+@56559594^56563684-@56559594^56560862-56561012^56563684-	sex-biased (male)	2
SE@CD200@chr3@+@112333224^112340902-@112333224^112335943-112336017^112340902-	sex-biased (male)	2
SE@CD46@chr1@+@207767195^207770321-@207767195^207767607-207767651^207767779-207767823^207770321-	sex-biased (male)	2
SE@CD46@chr1@+@207767195^207770321-@207767195^207767779-207767823^207770321-	sex-biased (male)	2
SE@CRYL1@chr13@-@20489370^20432296-@20489370^20476992-20476871^20473074-20472966^20439754-20439593^20432296-	sex-biased (male)	2
SE@CYBC1@chr17@-@82450480^82449292-@82450480^82449480-82449431^82449292-	sex-biased (male)	2
SE@DCN@chr12@-@91182655^91178585-@91182655^91179686-91179362^91178585-	sex-biased (male)	2
SE@DEF8@chr16@+@89948814^89954243-@89948814^89949417-89949513^89950067-89950306^89954243-	sex-biased (male)	2
SE@DEF8@chr16@+@89948814^89954243-@89948814^89949417-89949513^89950067-89950328^89954243-	sex-biased (male)	2
SE@DEF8@chr16@+@89948814^89954243-@89948814^89949417-89949513^89952558-89952682^89954243-	sex-biased (male)	2
SE@DEF8@chr16@+@89948814^89954243-@89948814^89949417-89949513^89952562-89952682^89954243-	sex-biased (male)	2
SE@DEF8@chr16@+@89948814^89954243-@89948814^89949417-89949513^89954243-	sex-biased (male)	2
SE@DEF8@chr16@+@89948814^89954243-@89948814^89949417-89949638^89954243-	sex-biased (male)	2
SE@DHX30@chr3@+@47818117^47827347-@47818117^47819236-47819264^47827347-	sex-biased (male)	2
SE@DLG4@chr17@-@7192945^7191358-@7192945^7192002-7191893^7191358-	sex-biased (male)	2
SE@DMTF1@chr7@+@87152555^87163495-@87152555^87154228-87154278^87154390-87154528^87163239-87163332^87163495-	sex-biased (male)	2
SE@DMTF1@chr7@+@87152555^87163495-@87152555^87154390-87154528^87163239-87163332^87163495-	sex-biased (male)	2
SE@DMTF1@chr7@+@87152555^87163495-@87152555^87163239-87163332^87163495-	sex-biased (male)	2
SE@DOLPP1@chr9@+@129085616^129086709-@129085616^129086139-129086267^129086709-	sex-biased (male)	2
SE@DPH7@chr9@-@137578625^137576167-@137578625^137577603-137577470^137576167-	sex-biased (male)	2
SE@DPH7@chr9@-@137578625^137576167-@137578625^137577603-137577470^137576402-137576309^137576167-	sex-biased (male)	2
SE@DPH7@chr9@-@137578625^137576167-@137578625^137577603-137577577^137576402-137576309^137576167-	sex-biased (male)	2
SE@DTNB@chr2@-@25387289^25379323-@25387289^25383889-25383836^25379323-	sex-biased (male)	2
SE@DUS2@chr16@+@68023351^68038006-@68023351^68025415-68025494^68026960-68027082^68038006-	sex-biased (male)	2
SE@DUS2@chr16@+@68023351^68038006-@68023351^68025415-68025494^68038006-	sex-biased (male)	2
SE@ENO3@chr17@+@4951914^4952795-@4951914^4952025-4952147^4952795-	sex-biased (male)	2
SE@EPB41@chr1@+@29053312^29064982-@29053312^29058589-29058645^29064982-	sex-biased (male)	2
SE@ERP29@chr12@+@112013609^112022150-@112013609^112019756-112019894^112022150-	sex-biased (male)	2
SE@FAM76B@chr11@-@95779607^95778957-@95779607^95779135-95779078^95778957-	sex-biased (male)	2
SE@FGFR1OP2@chr12@+@26957743^26963342-@26957743^26960515-26960628^26963342-	sex-biased (male)	2
SE@FKRP@chr19@+@46748088^46755412-@46748088^46748515-46748665^46748775-46748884^46755412-	sex-biased (male)	2
SE@FKRP@chr19@+@46748088^46755412-@46748088^46748515-46748665^46754102-46754181^46755412-	sex-biased (male)	2
SE@FKRP@chr19@+@46748088^46755412-@46748088^46748515-46748717^46754249-46754315^46755412-	sex-biased (male)	2
SE@FNDC4@chr2@-@27493389^27492478-@27493389^27492790-27492666^27492478-	sex-biased (male)	2
SE@GALE@chr1@-@23796697^23796265-@23796697^23796586-23796509^23796265-	sex-biased (male)	2
SE@GSDMB@chr17@-@39908958^39906987-@39908958^39908214-39908176^39906987-	sex-biased (male)	2
SE@IDI1@chr10@-@1048864^1043393-@1048864^1044171-1043999^1043393-	sex-biased (male)	2
SE@IGF2BP2@chr3@-@185675296^185658409-@185675296^185672669-185672541^185658409-	sex-biased (male)	2
SE@IL1R1@chr2@+@102154017^102157719-@102154017^102156146-102156246^102157719-	sex-biased (male)	2
SE@IRAG2@chr12@+@25052956^25063720-@25052956^25061592-25061653^25062820-25062900^25063720-	sex-biased (male)	2
SE@KDM5B@chr1@-@202766926^202764145-@202766926^202766504-202766397^202764145-	sex-biased (male)	2
SE@KLC1@chr14@+@103679518^103700655-@103679518^103687081-103687211^103700655-	sex-biased (male)	2
SE@KLF6@chr10@-@3781641^3779590-@3781641^3780229-3780106^3779590-	sex-biased (male)	2
SE@KMT2E@chr7@+@105014535^105040839-@105014535^105038126-105038199^105040839-	sex-biased (male)	2
SE@L3HYPDH@chr14@-@59474728^59473090-@59474728^59474526-59474439^59473090-	sex-biased (male)	2
SE@LRRC45@chr17@+@82023863^82024693-@82023863^82024278-82024339^82024693-	sex-biased (male)	2
SE@LRRFIP1@chr2@+@237708630^237748364-@237708630^237719523-237719567^237720772-237720822^237727876-237727935^237748364-	sex-biased (male)	2
SE@LRRFIP1@chr2@+@237749324^237753309-@237749324^237751200-237751271^237753309-	sex-biased (male)	2
SE@METTL22@chr16@+@8629110^8635168-@8629110^8635039-8635079^8635168-	sex-biased (male)	2
SE@METTL26@chr16@-@635281^634797-@635281^635063-634889^634797-	sex-biased (male)	2
SE@MLLT10@chr10@+@21682257^21713772-@21682257^21688491-21688538^21713772-	sex-biased (male)	2
SE@MLPH@chr2@+@237540533^237542567-@237540533^237540802-237540957^237542567-	sex-biased (male)	2
SE@MTHFD2@chr2@+@74201479^74207704-@74201479^74205705-74205889^74205982-74206088^74207704-	sex-biased (male)	2
SE@MUC1@chr1@-@155188163^155187576-@155188163^155187858-155187722^155187576-	sex-biased (male)	2
SE@MYH10@chr17@-@8577236^8569812-@8577236^8576672-8576643^8569812-	sex-biased (male)	2
SE@MYL6@chr12@+@56162331^56162855-@56162331^56162563-56162639^56162855-	sex-biased (male)	2
SE@MYNN@chr3@+@169773462^169774265-@169773462^169774031-169774097^169774265-	sex-biased (male)	2
SE@MYSM1@chr1@-@58690340^58685251-@58690340^58690249-58690226^58689116-58689038^58685251-	sex-biased (male)	2
SE@MYSM1@chr1@-@58690340^58685251-@58690340^58690249-58690226^58689367-58689294^58689116-58689038^58685251-	sex-biased (male)	2
SE@N4BP2L2@chr13@-@32517857^32444126-@32517857^32480637-32480590^32444126-	sex-biased (male)	2
SE@NAPB@chr20@-@23402993^23394999-@23402993^23397188-23397072^23395185-23395139^23394999-	sex-biased (male)	2
SE@NAPB@chr20@-@23402993^23394999-@23402993^23397200-23397072^23395185-23395139^23394999-	sex-biased (male)	2
SE@NCOR2@chr12@-@124341823^124340443-@124341823^124340751-124340602^124340443-	sex-biased (male)	2
SE@NFIB@chr9@-@14120440^14088326-@14120440^14116346-14116181^14113081-14112999^14088326-	sex-biased (male)	2
SE@NFIB@chr9@-@14120440^14088326-@14120440^14116346-14116181^14113081-14112999^14102510-14102422^14088326-	sex-biased (male)	2
SE@NFIB@chr9@-@14120440^14088326-@14120440^14116346-14116208^14113081-14112999^14088326-	sex-biased (male)	2
SE@NFIB@chr9@-@14120440^14088326-@14120440^14116346-14116208^14113081-14112999^14102510-14102422^14088326-	sex-biased (male)	2
SE@NUP58@chr13@+@25307948^25312883-@25307948^25309247-25309282^25309960-25310015^25312883-	sex-biased (male)	2
SE@OXR1@chr8@+@106713985^106739458-@106713985^106737520-106737600^106739458-	sex-biased (male)	2
SE@PAK4@chr19@+@39169757^39173576-@39169757^39172918-39173106^39173576-	sex-biased (male)	2
SE@PAK4@chr19@+@39169757^39173576-@39169757^39172918-39173376^39173576-	sex-biased (male)	2
SE@PARP3@chr3@+@51942708^51943349-@51942708^51942930-51943046^51943349-	sex-biased (male)	2
SE@PBX1@chr1@+@164812149^164821537-@164812149^164820072-164820184^164821537-	sex-biased (male)	2
SE@PCM1@chr8@+@17972687^17985447-@17972687^17980591-17980755^17983233-17983289^17985447-	sex-biased (male)	2
SE@PCM1@chr8@+@17980755^17985447-@17980755^17983233-17983289^17985447-	sex-biased (male)	2
SE@PDIA5@chr3@+@123124343^123145522-@123124343^123130480-123130616^123145522-	sex-biased (male)	2
SE@PFAS@chr17@+@8255132^8255805-@8255132^8255502-8255691^8255805-	sex-biased (male)	2
SE@PFKFB3@chr10@+@6224213^6232895-@6224213^6224506-6224623^6226192-6226365^6232895-	sex-biased (male)	2
SE@PFKFB3@chr10@+@6224213^6232895-@6224213^6225161-6225248^6226192-6226365^6232895-	sex-biased (male)	2
SE@PFKFB3@chr10@+@6224213^6232895-@6224213^6226192-6226365^6228196-6228218^6229109-6229180^6232895-	sex-biased (male)	2
SE@PFKFB3@chr10@+@6224213^6232895-@6224213^6226192-6226365^6228196-6228218^6231263-6231314^6232895-	sex-biased (male)	2
SE@PGAP2@chr11@+@3808315^3824270-@3808315^3811250-3811424^3822909-3822993^3823613-3823740^3823883-3824135^3824270-	sex-biased (male)	2
SE@PGAP2@chr11@+@3808315^3824270-@3808315^3822909-3822993^3823613-3823740^3823883-3824135^3824270-	sex-biased (male)	2
SE@PML@chr15@+@74024927^74034478-@74024927^74032572-74032715^74033156-74033422^74034478-	sex-biased (male)	2
SE@PML@chr15@+@74024927^74034478-@74024927^74033156-74033422^74034478-	sex-biased (male)	2
SE@PODN@chr1@+@53062308^53066812-@53062308^53063469-53063559^53066812-	sex-biased (male)	2
SE@PPCDC@chr15@+@75028453^75048553-@75028453^75043441-75043536^75048553-	sex-biased (male)	2
SE@PPCDC@chr15@+@75028453^75048553-@75028453^75044386-75044514^75048553-	sex-biased (male)	2
SE@PPFIBP1@chr12@+@27676599^27679489-@27676599^27677064-27677096^27679489-	sex-biased (male)	2
SE@PRDM2@chr1@+@13749487^13773078-@13749487^13769118-13769173^13773078-	sex-biased (male)	2
SE@PRUNE1@chr1@+@151027327^151033806-@151027327^151028786-151028944^151031372-151031464^151033806-	sex-biased (male)	2
SE@PSMA4@chr15@+@78542219^78544190-@78542219^78542576-78542645^78544190-	sex-biased (male)	2
SE@PTGES2@chr9@-@128125244^128124550-@128125244^128124871-128124779^128124550-	sex-biased (male)	2
SE@PTPRF@chr1@+@43592601^43598720-@43592601^43597748-43598053^43598720-	sex-biased (male)	2
SE@RASL12@chr15@-@65067733^65059418-@65067733^65065273-65065217^65059418-	sex-biased (male)	2
SE@RHOT1@chr17@+@32171101^32173831-@32171101^32172937-32173060^32173831-	sex-biased (male)	2
SE@RIN3@chr14@+@92577477^92641238-@92577477^92615407-92615479^92641238-	sex-biased (male)	2
SE@RNF146@chr6@+@127280340^127286050-@127280340^127280516-127280604^127282287-127282395^127286050-	sex-biased (male)	2
SE@RNF146@chr6@+@127280340^127286050-@127280340^127280516-127280604^127286050-	sex-biased (male)	2
SE@RPP40@chr6@-@5002101^4999904-@5002101^5000631-5000563^4999904-	sex-biased (male)	2
SE@RPS24@chr10@+@78037304^78037965-@78037304^78037439-78037441^78037965-	sex-biased (male)	2
SE@RPS24@chr10@+@78037441^78040204-@78037441^78037965-78037982^78040204-	sex-biased (male)	2
SE@SAR1A@chr10@-@70170413^70161931-@70170413^70162759-70162690^70161931-	sex-biased (male)	2
SE@SART3@chr12@-@108545139^108543152-@108545139^108544532-108544427^108543152-	sex-biased (male)	2
SE@SBF1@chr22@-@50459255^50456673-@50459255^50457111-50457034^50456673-	sex-biased (male)	2
SE@SCYL2@chr12@+@100317925^100323525-@100317925^100319224-100319286^100323525-	sex-biased (male)	2
SE@SDF2@chr17@-@28655287^28649276-@28655287^28651577-28651486^28649276-	sex-biased (male)	2
SE@SEMA6D@chr15@+@47767093^47770497-@47767093^47768581-47768748^47770497-	sex-biased (male)	2
SE@SENP7@chr3@-@101417593^101372126-@101417593^101399055-101398861^101372126-	sex-biased (male)	2
SE@SENP7@chr3@-@101458955^101399055-@101458955^101417790-101417593^101399055-	sex-biased (male)	2
SE@SEPTIN6@chrX@-@119629318^119618786-@119629318^119625379-119625335^119618786-	sex-biased (male)	2
SE@SLFN11@chr17@-@35373474^35367063-@35373474^35367700-35367541^35367063-	sex-biased (male)	2
SE@SLMAP@chr3@+@57864716^57890041-@57864716^57864807-57864857^57883961-57884026^57890041-	sex-biased (male)	2
SE@SLMAP@chr3@+@57864716^57890041-@57864716^57864807-57864857^57890041-	sex-biased (male)	2
SE@SPAG9@chr17@-@50977108^50974947-@50977108^50975901-50975863^50974947-	sex-biased (male)	2
SE@SPTAN1@chr9@+@128609284^128611714-@128609284^128609651-128609665^128611714-	sex-biased (male)	2
SE@ST3GAL5@chr2@-@85861181^85848381-@85861181^85853000-85852860^85851703-85851264^85848381-	sex-biased (male)	2
SE@STAMBP@chr2@+@73829070^73830845-@73829070^73829405-73829510^73830845-	sex-biased (male)	2
SE@SULT1C4@chr2@+@108381887^108383416-@108381887^108382385-108382482^108383093-108383219^108383416-	sex-biased (male)	2
SE@TAF1C@chr16@-@84186901^84184989-@84186901^84185583-84185480^84184989-	sex-biased (male)	2
SE@TBC1D7@chr6@-@13326787^13321095-@13326787^13325174-13325094^13321095-	sex-biased (male)	2
SE@TCF7L2@chr10@+@113158069^113165555-@113158069^113158667-113158717^113159920-113159992^113161579-113161603^113165555-	sex-biased (male)	2
SE@TCF7L2@chr10@+@113158069^113165555-@113158069^113158667-113158717^113160619-113160691^113165555-	sex-biased (male)	2
SE@TCF7L2@chr10@+@113158069^113165555-@113158069^113158667-113158717^113165555-	sex-biased (male)	2
SE@TCF7L2@chr10@+@113158069^113165555-@113158069^113159920-113159992^113165555-	sex-biased (male)	2
SE@TCF7L2@chr10@+@113158069^113165555-@113158069^113160619-113160691^113165555-	sex-biased (male)	2
SE@TCF7L2@chr10@+@113158717^113165555-@113158717^113159920-113159992^113160619-113160691^113165555-	sex-biased (male)	2
SE@TCTN1@chr12@+@110614402^110626362-@110614402^110616277-110616352^110619836-110619956^110626362-	sex-biased (male)	2
SE@TCTN1@chr12@+@110614402^110626362-@110614402^110616748-110616904^110619836-110619956^110626362-	sex-biased (male)	2
SE@TDP1@chr14@+@89980632^89984516-@89980632^89983114-89983276^89984516-	sex-biased (male)	2
SE@TEDC1@chr14@+@105492734^105497357-@105492734^105493835-105493933^105497357-	sex-biased (male)	2
SE@THAP6@chr4@+@75516979^75526960-@75516979^75521736-75521861^75526960-	sex-biased (male)	2
SE@THEMIS2@chr1@+@27876728^27885295-@27876728^27879644-27880054^27881971-27882125^27882513-27883043^27885295-	sex-biased (male)	2
SE@THEMIS2@chr1@+@27876728^27885295-@27876728^27879644-27880054^27881971-27883043^27885295-	sex-biased (male)	2
SE@THEMIS2@chr1@+@27876728^27885295-@27876728^27879644-27880054^27885295-	sex-biased (male)	2
SE@TMEM234@chr1@-@32221131^32217351-@32221131^32217577-32217437^32217351-	sex-biased (male)	2
SE@TNNT3@chr11@+@1926481^1929810-@1926481^1926695-1926709^1929810-	sex-biased (male)	2
SE@TRAF3@chr14@+@102777675^102870185-@102777675^102809008-102809129^102810664-102810746^102830334-102830472^102870185-	sex-biased (male)	2
SE@TRIT1@chr1@-@39853970^39850261-@39853970^39852876-39852731^39850261-	sex-biased (male)	2
SE@TRMO@chr9@-@97913401^97910616-@97913401^97912975-97912873^97910616-	sex-biased (male)	2
SE@U2AF1@chr21@-@43101366^43095743-@43101366^43100519-43100453^43095743-	sex-biased (male)	2
SE@UNK@chr17@+@75784984^75809760-@75784984^75808948-75809039^75809760-	sex-biased (male)	2
SE@XPA@chr9@-@97684923^97675587-@97684923^97682430-97682200^97675587-	sex-biased (male)	2
SE@ZNF226@chr19@+@44165142^44165757-@44165142^44165588-44165613^44165757-	sex-biased (male)	2
RI@CSF3R@chr1@-@36467230^36466827-@36467229^36467231-36466827^36466829-	sex-common	3
RI@MCOLN1@chr19@+@7527628^7527864-@7527627^7527629-7527864^7527866-	sex-common	3
SE@ATG13@chr11@+@46617890^46644279-@46617890^46618325-46618375^46621042-46621157^46644279-	sex-common	3
SE@ATG13@chr11@+@46617890^46644279-@46617890^46618325-46618375^46621060-46621157^46644279-	sex-common	3
SE@FMNL3@chr12@-@49661966^49657190-@49661966^49658594-49658442^49657190-	sex-common	3
SE@N4BP2L2@chr13@-@32538618^32527532-@32538618^32537027-32536933^32527532-	sex-common	3
SE@NR4A1@chr12@+@52043911^52054327-@52043911^52052496-52052645^52054327-	sex-common	3
SE@PTBP2@chr1@+@96804939^96806866-@96804939^96806419-96806452^96806866-	sex-common	3
SE@RIC8B@chr12@+@106870942^106885904-@106870942^106874481-106874567^106878987-106879125^106879775-106879947^106885904-	sex-common	3
SE@SPATA18@chr4@+@52051791^52071917-@52051791^52060419-52060524^52060782-52060897^52062220-52062332^52069821-52069916^52071917-	sex-common	3
SE@SPATA18@chr4@+@52051791^52071917-@52051791^52060419-52060524^52060782-52060897^52062220-52062332^52071917-	sex-common	3
SE@SPATA18@chr4@+@52051791^52071917-@52051791^52060419-52060524^52060782-52060897^52071917-	sex-common	3
SE@ZNF846@chr19@-@9762082^9758764-@9762082^9759942-9759860^9758764-	sex-common	3
A3SS@ADAMTS10@chr19@-@8589889^8589574-@8589889^8589585-	sex-biased (female)	3
A3SS@ALS2CL@chr3@-@46682029^46681573-@46682029^46681598-	sex-biased (female)	3
A3SS@AMOTL2@chr3@-@134359283^134358716-@134359283^134358719-	sex-biased (female)	3
A3SS@C1D@chr2@-@68053061^68047315-@68053061^68047319-	sex-biased (female)	3
A3SS@CAPRIN2@chr12@-@30716508^30715141-@30716508^30715144-	sex-biased (female)	3
A3SS@CDK8@chr13@+@26401347^26401469-@26401347^26401466-	sex-biased (female)	3
A3SS@CPNE1@chr20@-@35627280^35626800-@35627280^35626803-	sex-biased (female)	3
A3SS@DEF8@chr16@+@89948814^89949565-@89948814^89949417-	sex-biased (female)	3
A3SS@ETAA1@chr2@+@67402974^67405236-@67402974^67403225-	sex-biased (female)	3
A3SS@GUK1@chr1@+@228141829^228145511-@228141829^228145492-	sex-biased (female)	3
A3SS@HDAC4@chr2@-@239134245^239126679-@239134245^239126694-	sex-biased (female)	3
A3SS@HSPB7@chr1@-@16017765^16017219-@16017765^16017222-	sex-biased (female)	3
A3SS@MINK1@chr17@+@4891124^4891516-@4891124^4891456-	sex-biased (female)	3
A3SS@MRPL52@chr14@+@22829948^22830053-@22829948^22830050-	sex-biased (female)	3
A3SS@MRPS36@chr5@+@69218111^69226342-@69218111^69226338-	sex-biased (female)	3
A3SS@MSTO1@chr1@+@155610332^155610425-@155610332^155610394-	sex-biased (female)	3
A3SS@PARVG@chr22@+@44185872^44187776-@44185872^44186577-	sex-biased (female)	3
A3SS@PKP4@chr2@+@158621421^158624955-@158621421^158624878-	sex-biased (female)	3
A3SS@PKP4@chr2@+@158631941^158634073-@158631941^158634070-	sex-biased (female)	3
A3SS@SAMD4A@chr14@+@54776540^54784537-@54776540^54784340-	sex-biased (female)	3
A3SS@SKAP1@chr17@-@48170609^48162566-@48170609^48162569-	sex-biased (female)	3
A3SS@SLC11A1@chr2@+@218382375^218384243-218384365^218384907-218385001^218385147-@218382375^218382960-	sex-biased (female)	3
A3SS@SLC11A1@chr2@+@218382375^218384243-218384365^218385147-@218382375^218382960-	sex-biased (female)	3
A3SS@SP100@chr2@+@230470098^230473384-@230470098^230473324-	sex-biased (female)	3
A3SS@SSH3@chr11@+@67303691^67304118-@67303691^67304049-	sex-biased (female)	3
A3SS@SSH3@chr11@+@67304155^67304777-@67304155^67304773-	sex-biased (female)	3
A3SS@TAF1@chrX@+@71375286^71377013-@71375286^71376950-	sex-biased (female)	3
A3SS@TCF20@chr22@-@42169847^42168703-@42169847^42168736-	sex-biased (female)	3
A3SS@TPM1@chr15@+@63042943^63044027-@63042943^63043706-	sex-biased (female)	3
A3SS@TRIP10@chr19@+@6744994^6746178-@6744994^6746029-	sex-biased (female)	3
A3SS@TRMU@chr22@+@46346544^46350350-@46346544^46350346-	sex-biased (female)	3
A3SS@WFS1@chr4@+@6270014^6277455-@6270014^6277451-	sex-biased (female)	3
A3SS@ZDHHC20@chr13@-@21382920^21381546-@21382920^21381549-	sex-biased (female)	3
A5SS@ABHD3@chr18@-@21664118^21659343-@21663678^21659343-	sex-biased (female)	3
A5SS@CDAN1@chr15@-@42727668^42726417-@42727621^42726417-	sex-biased (female)	3
A5SS@CHTF18@chr16@+@792347^792439-@792367^792439-	sex-biased (female)	3
A5SS@CTIF@chr18@+@48758405^48761390-@48758411^48761390-	sex-biased (female)	3
A5SS@ENPP3@chr6@+@131674281^131675080-@131674410^131675080-	sex-biased (female)	3
A5SS@FAM193B@chr5@-@177532156^177531521-@177531953^177531521-	sex-biased (female)	3
A5SS@GOLGA8A@chr15@-@34407576^34406870-@34407524^34406870-	sex-biased (female)	3
A5SS@INTS6L@chrX@+@135577295^135579788-@135577427^135579788-	sex-biased (female)	3
A5SS@LARP7@chr4@+@112644768^112646351-@112644871^112646351-	sex-biased (female)	3
A5SS@MAP4K4@chr2@+@101887237^101887778-@101887261^101887778-	sex-biased (female)	3
A5SS@MSTO1@chr1@+@155611827^155611983-@155611852^155611983-	sex-biased (female)	3
A5SS@NCK1@chr3@+@136862319^136927984-@136862353^136927984-	sex-biased (female)	3
A5SS@NDUFAF7@chr2@+@37237835^37241578-@37237867^37241578-	sex-biased (female)	3
A5SS@NEIL1@chr15@+@75347999^75348884-@75348026^75348884-	sex-biased (female)	3
A5SS@PIDD1@chr11@-@800384^800244-@800333^800244-	sex-biased (female)	3
A5SS@PLEKHH3@chr17@-@42669943^42669621-@42669918^42669621-	sex-biased (female)	3
A5SS@PMS1@chr2@+@189863974^189867799-@189864228^189867799-	sex-biased (female)	3
A5SS@RAD52@chr12@-@927145^925525-@926796^925525-	sex-biased (female)	3
A5SS@RAD9A@chr11@+@67396171^67396263-@67396175^67396263-	sex-biased (female)	3
A5SS@SLC25A19@chr17@-@75288502^75286802-@75288388^75286802-	sex-biased (female)	3
A5SS@TM2D3@chr15@-@101652271^101650161-@101651696^101650161-	sex-biased (female)	3
A5SS@TMEM175@chr4@+@948154^950421-@948615^950421-	sex-biased (female)	3
RI@ABCF3@chr3@+@184189277^184189388-@184189276^184189278-184189388^184189390-	sex-biased (female)	3
RI@ACP2@chr11@-@47248038^47247727-@47248037^47248039-47247727^47247729-	sex-biased (female)	3
RI@AKT2@chr19@-@40237969^40236385-@40237968^40237970-40236385^40236387-	sex-biased (female)	3
RI@BCO2@chr11@+@112193697^112193879-@112193696^112193698-112193879^112193881-	sex-biased (female)	3
RI@CSF3R@chr1@-@36472066^36471646-@36472065^36472067-36471646^36471648-	sex-biased (female)	3
RI@CTSA@chr20@+@45895133^45896965-@45895132^45895134-45896965^45896967-	sex-biased (female)	3
RI@CTSA@chr20@+@45897040^45897717-@45897039^45897041-45897717^45897719-	sex-biased (female)	3
RI@DDX3X@chrX@+@41347451^41347640-@41347450^41347452-41347640^41347642-	sex-biased (female)	3
RI@DUS3L@chr19@-@5787061^5786845-@5787060^5787062-5786845^5786847-	sex-biased (female)	3
RI@EFEMP2@chr11@-@65870536^65870237-@65870535^65870537-65870237^65870239-	sex-biased (female)	3
RI@EIF2B5@chr3@+@184136736^184137620-@184136735^184136737-184137620^184137622-	sex-biased (female)	3
RI@EWSR1@chr22@+@29299280^29299599-@29299279^29299281-29299599^29299601-	sex-biased (female)	3
RI@FGG@chr4@-@154610067^154609763-@154610066^154610068-154609763^154609765-	sex-biased (female)	3
RI@FGG@chr4@-@154612391^154612201-@154612390^154612392-154612201^154612203-	sex-biased (female)	3
RI@HDAC6@chrX@+@48815051^48815384-@48815050^48815052-48815384^48815386-	sex-biased (female)	3
RI@HMBS@chr11@+@119092163^119092404-@119092162^119092164-119092404^119092406-	sex-biased (female)	3
RI@HPD@chr12@-@121857757^121857432-@121857756^121857758-121857432^121857434-	sex-biased (female)	3
RI@IL17RB@chr3@+@53857690^53858719-@53857689^53857691-53858719^53858721-	sex-biased (female)	3
RI@KIAA1671@chr22@+@25174489^25177348-@25174488^25174490-25177348^25177350-	sex-biased (female)	3
RI@MLXIPL@chr7@-@73596639^73596479-@73596638^73596640-73596479^73596481-	sex-biased (female)	3
RI@MRRF@chr9@+@122285287^122285780-@122285286^122285288-122285780^122285782-	sex-biased (female)	3
RI@N4BP2L2@chr13@-@32538778^32538684-@32538777^32538779-32538684^32538686-	sex-biased (female)	3
RI@NBPF26@chr1@+@120805458^120805556-@120805457^120805459-120805556^120805558-	sex-biased (female)	3
RI@NECAP2@chr1@+@16449201^16451838-@16449200^16449202-16451838^16451840-	sex-biased (female)	3
RI@NGDN@chr14@+@23475308^23475558-@23475307^23475309-23475558^23475560-	sex-biased (female)	3
RI@NGDN@chr14@+@23477356^23477503-@23477355^23477357-23477503^23477505-	sex-biased (female)	3
RI@NME3@chr16@-@1771070^1770993-@1771069^1771071-1770993^1770995-	sex-biased (female)	3
RI@NMT1@chr17@+@45103876^45104859-@45103875^45103877-45104859^45104861-	sex-biased (female)	3
RI@OPLAH@chr8@-@144053209^144053129-@144053208^144053210-144053129^144053131-	sex-biased (female)	3
RI@PAXX@chr9@+@136992700^136992925-@136992699^136992701-136992925^136992927-	sex-biased (female)	3
RI@PEAR1@chr1@+@156908051^156908128-@156908050^156908052-156908128^156908130-	sex-biased (female)	3
RI@PGAP3@chr17@-@39673993^39673650-@39673992^39673994-39673650^39673652-	sex-biased (female)	3
RI@PI4KA@chr22@-@20713281^20712797-@20713280^20713282-20712797^20712799-	sex-biased (female)	3
RI@PPT1@chr1@-@40092398^40092172-@40092397^40092399-40092172^40092174-	sex-biased (female)	3
RI@PSMC4@chr19@+@39980146^39980286-@39980145^39980147-39980286^39980288-	sex-biased (female)	3
RI@PTBP2@chr1@+@96804939^96806419-@96804938^96804940-96806419^96806421-	sex-biased (female)	3
RI@QRICH1@chr3@-@49033120^49032773-@49033119^49033121-49032773^49032775-	sex-biased (female)	3
RI@RASAL1@chr12@-@113119362^113119259-@113119361^113119363-113119259^113119261-	sex-biased (female)	3
RI@RPS6KB1@chr17@+@59936277^59936464-@59936276^59936278-59936464^59936466-	sex-biased (female)	3
RI@SLC37A4@chr11@-@119028194^119027872-@119028193^119028195-119027872^119027874-	sex-biased (female)	3
RI@SRSF5@chr14@+@69769251^69770467-@69769250^69769252-69770467^69770469-	sex-biased (female)	3
RI@STXBP2@chr19@+@7647247^7647354-@7647246^7647248-7647354^7647356-	sex-biased (female)	3
RI@TBK1@chr12@+@64495604^64495699-@64495603^64495605-64495699^64495701-	sex-biased (female)	3
RI@TBK1@chr12@+@64495775^64496367-@64495774^64495776-64496367^64496369-	sex-biased (female)	3
RI@TINAGL1@chr1@+@31583241^31583461-@31583240^31583242-31583461^31583463-	sex-biased (female)	3
RI@TINAGL1@chr1@+@31583575^31584678-@31583574^31583576-31584678^31584680-	sex-biased (female)	3
RI@TINAGL1@chr1@+@31585485^31585753-@31585484^31585486-31585753^31585755-	sex-biased (female)	3
RI@TINAGL1@chr1@+@31585876^31586710-@31585875^31585877-31586710^31586712-	sex-biased (female)	3
RI@TM7SF2@chr11@+@65112865^65113220-@65112864^65112866-65113220^65113222-	sex-biased (female)	3
RI@TM7SF2@chr11@+@65114832^65114913-@65114831^65114833-65114913^65114915-	sex-biased (female)	3
RI@TMEM126B@chr11@+@85635778^85636046-@85635777^85635779-85636046^85636048-	sex-biased (female)	3
RI@U2AF1@chr21@-@43104315^43100519-@43104314^43104316-43100519^43100521-	sex-biased (female)	3
RI@UNC93B1@chr11@-@68003657^68003175-@68003656^68003658-68003175^68003177-	sex-biased (female)	3
RI@WDR6@chr3@+@49014116^49014210-@49014115^49014117-49014210^49014212-	sex-biased (female)	3
RI@YIF1B@chr19@-@38309405^38309328-@38309404^38309406-38309328^38309330-	sex-biased (female)	3
RI@ZNF160@chr19@-@53091637^53091529-@53091636^53091638-53091529^53091531-	sex-biased (female)	3
SE@ABI3BP@chr3@-@100822589^100808235-@100822589^100821113-100821054^100820303-100820220^100818581-100818525^100817495-100817436^100816768-100816688^100815971-100815912^100813735-100813661^100812523-100812467^100811799-100811728^100811277-100811230^100810477-100810412^100808235-	sex-biased (female)	3
SE@ACAA1@chr3@-@38131926^38129388-@38131926^38131638-38131596^38129388-	sex-biased (female)	3
SE@ADAM15@chr1@+@155060343^155062245-@155060343^155060763-155060832^155061415-155061489^155061904-155061975^155062245-	sex-biased (female)	3
SE@ADAM15@chr1@+@155060343^155062245-@155060343^155060763-155060832^155061415-155061489^155061904-155062117^155062245-	sex-biased (female)	3
SE@ADAM15@chr1@+@155060343^155062245-@155060343^155060763-155060832^155061415-155061489^155062245-	sex-biased (female)	3
SE@ADAM15@chr1@+@155060343^155062245-@155060343^155060763-155060832^155061418-155061489^155061576-155061646^155062245-	sex-biased (female)	3
SE@ADAM15@chr1@+@155060343^155062245-@155060343^155060763-155060832^155061418-155061489^155061904-155061975^155062245-	sex-biased (female)	3
SE@ADAM15@chr1@+@155060343^155062245-@155060343^155060763-155060832^155061904-155061975^155062245-	sex-biased (female)	3
SE@ADAM15@chr1@+@155060343^155062245-@155060343^155060763-155060832^155061904-155062117^155062245-	sex-biased (female)	3
SE@ADAM15@chr1@+@155060343^155062245-@155060343^155060763-155060832^155062245-	sex-biased (female)	3
SE@ADAM15@chr1@+@155060343^155062245-@155060343^155061418-155061489^155062245-	sex-biased (female)	3
SE@ADCK1@chr14@+@77822518^77887091-@77822518^77827854-77827971^77859076-77859279^77887091-	sex-biased (female)	3
SE@AHI1@chr6@-@135300500^135285647-@135300500^135290525-135290423^135285647-	sex-biased (female)	3
SE@AHI1@chr6@-@135300500^135285647-@135300500^135290525-135290423^135286548-135286399^135285647-	sex-biased (female)	3
SE@AHI1@chr6@-@135300500^135285647-@135300500^135297492-135297432^135290525-135290423^135285647-	sex-biased (female)	3
SE@AHI1@chr6@-@135318519^135300558-@135318519^135302817-135302712^135301539-135301408^135300558-	sex-biased (female)	3
SE@AKT2@chr19@-@40285181^40257054-@40285181^40265351-40265259^40257054-	sex-biased (female)	3
SE@ANKRD13D@chr11@+@67289550^67290078-@67289550^67289829-67289965^67290078-	sex-biased (female)	3
SE@ANKRD37@chr4@+@185396424^185397150-@185396424^185396832-185396950^185397150-	sex-biased (female)	3
SE@ANKRD9@chr14@-@102509529^102508549-@102509529^102508846-102508641^102508549-	sex-biased (female)	3
SE@ARHGAP17@chr16@-@24941987^24935639-@24941987^24939597-24939364^24935639-	sex-biased (female)	3
SE@ARHGAP23@chr17@+@38497826^38500597-@38497826^38498414-38498510^38498932-38498954^38500597-	sex-biased (female)	3
SE@ARHGAP23@chr17@+@38497826^38500597-@38497826^38498414-38498510^38500597-	sex-biased (female)	3
SE@ASCC2@chr22@-@29838178^29825257-@29838178^29832342-29832245^29825257-	sex-biased (female)	3
SE@ATF2@chr2@-@175130138^175118369-@175130138^175121540-175121444^175118369-	sex-biased (female)	3
SE@ATG13@chr11@+@46617890^46644279-@46617890^46618325-46618375^46644279-	sex-biased (female)	3
SE@ATG16L2@chr11@+@72822961^72824734-@72822961^72823544-72823797^72824060-72824122^72824734-	sex-biased (female)	3
SE@ATG16L2@chr11@+@72822961^72824734-@72822961^72823766-72823797^72824060-72824122^72824734-	sex-biased (female)	3
SE@ATP9B@chr18@+@79154555^79193183-@79154555^79173702-79173733^79176813-79176907^79193183-	sex-biased (female)	3
SE@AXIN2@chr17@-@65537324^65536553-@65537324^65537063-65536869^65536553-	sex-biased (female)	3
SE@BCORL1@chrX@+@130022977^130028635-@130022977^130024990-130025379^130028635-	sex-biased (female)	3
SE@BPTF@chr17@+@67959875^67964212-@67959875^67963333-67963506^67964212-	sex-biased (female)	3
SE@C11orf80@chr11@+@66759096^66796281-@66759096^66762079-66762450^66788160-66788269^66796281-	sex-biased (female)	3
SE@C11orf80@chr11@+@66759096^66796281-@66759096^66788160-66788269^66796281-	sex-biased (female)	3
SE@C11orf80@chr11@+@66759096^66796281-@66759096^66788160-66788273^66796281-	sex-biased (female)	3
SE@CABIN1@chr22@+@24038461^24042904-@24038461^24041139-24041273^24042904-	sex-biased (female)	3
SE@CALHM2@chr10@-@103452156^103450800-@103452156^103451285-103451083^103450800-	sex-biased (female)	3
SE@CASP3@chr4@-@184649395^184638468-@184649395^184648631-184648465^184638468-	sex-biased (female)	3
SE@CASP3@chr4@-@184649395^184638468-@184649395^184648631-184648503^184638468-	sex-biased (female)	3
SE@CCNYL1@chr2@+@207737446^207742223-@207737446^207740655-207740706^207742223-	sex-biased (female)	3
SE@CDK7@chr5@+@69252451^69258043-@69252451^69255460-69255528^69258043-	sex-biased (female)	3
SE@CDPF1@chr22@-@46250256^46247221-@46250256^46248284-46248172^46247221-	sex-biased (female)	3
SE@CEP20@chr16@-@15884008^15879888-@15884008^15883020-15882949^15879888-	sex-biased (female)	3
SE@CEP44@chr4@+@174316290^174331482-@174316290^174316530-174316567^174317335-174318665^174318835-174319087^174331482-	sex-biased (female)	3
SE@CIRBP@chr19@+@1272051^1274307-@1272051^1273494-1273715^1274307-	sex-biased (female)	3
SE@CIRBP@chr19@+@1272051^1274307-@1272051^1273601-1273715^1274307-	sex-biased (female)	3
SE@CP@chr3@-@149177840^149166050-@149177840^149176412-149176250^149166050-	sex-biased (female)	3
SE@CREM@chr10@+@35127193^35178889-@35127193^35137782-35137879^35178889-	sex-biased (female)	3
SE@CSNK1G3@chr5@+@123604830^123614342-@123604830^123605339-123605362^123614342-	sex-biased (female)	3
SE@CYP2R1@chr11@-@14885776^14879207-@14885776^14880768-14880136^14879207-	sex-biased (female)	3
SE@DCUN1D2@chr13@-@113474124^113461136-@113474124^113462891-113462740^113461136-	sex-biased (female)	3
SE@DGLUCY@chr14@+@91145313^91157639-@91145313^91147781-91147858^91157639-	sex-biased (female)	3
SE@DLG2@chr11@-@83962885^83874488-@83962885^83930483-83930328^83874488-	sex-biased (female)	3
SE@DPY19L2@chr12@-@63582406^63570857-@63582406^63580836-63580662^63570857-	sex-biased (female)	3
SE@E2F6@chr2@-@11465772^11453798-@11465772^11457233-11457179^11455474-11455342^11453798-	sex-biased (female)	3
SE@EIF4A2@chr3@+@186784696^186785883-@186784696^186784962-186785101^186785883-	sex-biased (female)	3
SE@ELMOD3@chr2@+@85362260^85368686-@85362260^85363097-85363166^85368686-	sex-biased (female)	3
SE@EPS15L1@chr19@-@16385129^16361984-@16385129^16377254-16377122^16361984-	sex-biased (female)	3
SE@ERC1@chr12@+@1190052^1236769-@1190052^1204501-1204512^1236769-	sex-biased (female)	3
SE@FAM193B@chr5@-@177532443^177525205-@177532443^177532131-177531953^177531521-177531282^177525205-	sex-biased (female)	3
SE@FDPS@chr1@+@155308965^155310043-@155308965^155309789-155309965^155310043-	sex-biased (female)	3
SE@FMNL3@chr12@-@49646886^49645903-@49646886^49646753-49646639^49645903-	sex-biased (female)	3
SE@GALNS@chr16@-@88856758^88842829-@88856758^88843199-88843030^88842829-	sex-biased (female)	3
SE@GGA3@chr17@-@75246509^75243570-@75246509^75244717-75244619^75244490-75244402^75243570-	sex-biased (female)	3
SE@GK5@chr3@-@142185929^142183049-@142185929^142185793-142184711^142183049-	sex-biased (female)	3
SE@GMIP@chr19@-@19636707^19635569-@19636707^19635721-19635644^19635569-	sex-biased (female)	3
SE@GSTA3@chr6@-@52905748^52902478-@52905748^52903727-52903676^52902478-	sex-biased (female)	3
SE@GTPBP1@chr22@+@38734397^38737951-@38734397^38736029-38736256^38737951-	sex-biased (female)	3
SE@HAUS2@chr15@+@42548965^42559339-@42548965^42558198-42558290^42559339-	sex-biased (female)	3
SE@HDAC7@chr12@-@47819767^47798972-@47819767^47819142-47819120^47802274-47802224^47798972-	sex-biased (female)	3
SE@IFI44@chr1@+@78649905^78654243-@78649905^78650541-78650652^78654243-	sex-biased (female)	3
SE@IRAK4@chr12@+@43768272^43772180-@43768272^43771038-43771104^43771220-43771365^43772180-	sex-biased (female)	3
SE@IRAK4@chr12@+@43768272^43772180-@43768272^43771220-43771365^43772180-	sex-biased (female)	3
SE@IRF7@chr11@-@614476^614037-@614476^614399-614174^614037-	sex-biased (female)	3
SE@KCTD17@chr22@+@37059438^37062525-@37059438^37061539-37061629^37062525-	sex-biased (female)	3
SE@KIAA1109@chr4@+@122325320^122328104-@122325320^122325855-122325917^122328104-	sex-biased (female)	3
SE@KLHL4@chrX@+@87664935^87669329-@87664935^87666475-87666880^87669329-	sex-biased (female)	3
SE@LIMCH1@chr4@+@41619440^41644500-@41619440^41638932-41638967^41644500-	sex-biased (female)	3
SE@LRR1@chr14@+@49602468^49614256-@49602468^49603552-49603618^49607400-49608121^49612472-49612624^49614256-	sex-biased (female)	3
SE@LUC7L@chr16@-@229279^227336-@229279^228402-228333^227336-	sex-biased (female)	3
SE@METAP1@chr4@+@99035460^99039374-@99035460^99037767-99037941^99039374-	sex-biased (female)	3
SE@MOSPD1@chrX@-@134896817^134889192-@134896817^134891640-134891479^134889192-	sex-biased (female)	3
SE@MTRR@chr5@+@7870923^7875258-@7870923^7873373-7873526^7875258-	sex-biased (female)	3
SE@MYH11@chr16@-@15786630^15782477-@15786630^15784718-15784698^15782477-	sex-biased (female)	3
SE@MYO19@chr17@-@36503097^36501235-@36503097^36501901-36501852^36501235-	sex-biased (female)	3
SE@MYO19@chr17@-@36513429^36511455-@36513429^36512779-36512658^36511455-	sex-biased (female)	3
SE@NAAA@chr4@-@75919909^75914985-@75919909^75918789-75918761^75914985-	sex-biased (female)	3
SE@NAE1@chr16@-@66830847^66826583-@66830847^66826780-66826668^66826583-	sex-biased (female)	3
SE@NFATC3@chr16@+@68191775^68226350-@68191775^68221196-68221284^68226350-	sex-biased (female)	3
SE@NPIPB4@chr16@-@21857259^21852046-@21857259^21854421-21854084^21852046-	sex-biased (female)	3
SE@NQO2@chr6@+@3003789^3006468-@3003789^3004495-3004651^3006468-	sex-biased (female)	3
SE@NRDC@chr1@-@51840226^51836212-@51840226^51836438-51836369^51836212-	sex-biased (female)	3
SE@NRDC@chr1@-@51840226^51836212-@51840226^51837620-51837487^51836438-51836369^51836212-	sex-biased (female)	3
SE@NSMF@chr9@-@137456411^137454443-@137456411^137455634-137455629^137455307-137455239^137454443-	sex-biased (female)	3
SE@NT5C2@chr10@-@103193236^103174982-@103193236^103181328-103181185^103174982-	sex-biased (female)	3
SE@NT5C2@chr10@-@103193236^103174982-@103193236^103187246-103187125^103181328-103181185^103174982-	sex-biased (female)	3
SE@NT5C3A@chr7@-@33062568^33026915-@33062568^33035988-33035934^33026915-	sex-biased (female)	3
SE@OSBPL9@chr1@+@51652041^51714003-@51652041^51669434-51669512^51714003-	sex-biased (female)	3
SE@OSBPL9@chr1@+@51652041^51714003-@51652041^51669434-51669814^51714003-	sex-biased (female)	3
SE@OXR1@chr8@+@106713985^106739458-@106713985^106737520-106737600^106739458-	sex-biased (female)	3
SE@PACRGL@chr4@+@20704814^20712788-@20704814^20707803-20707870^20709683-20709773^20712788-	sex-biased (female)	3
SE@PACRGL@chr4@+@20704814^20712788-@20704814^20707803-20707870^20712788-	sex-biased (female)	3
SE@PACRGL@chr4@+@20704814^20712788-@20704814^20709683-20709773^20712788-	sex-biased (female)	3
SE@PAPSS2@chr10@+@87715843^87727284-@87715843^87721756-87721770^87727284-	sex-biased (female)	3
SE@PDCD7@chr15@-@65129032^65119463-@65129032^65119954-65119718^65119463-	sex-biased (female)	3
SE@PFKFB3@chr10@+@6224213^6232895-@6224213^6226192-6226365^6228196-6228218^6229109-6229180^6232895-	sex-biased (female)	3
SE@PFKFB3@chr10@+@6224213^6232895-@6224213^6226192-6226365^6228196-6228218^6231263-6231314^6232895-	sex-biased (female)	3
SE@PGAP2@chr11@+@3808315^3824270-@3808315^3811250-3811424^3817353-3817535^3823883-3824135^3824270-	sex-biased (female)	3
SE@PGAP2@chr11@+@3808315^3824270-@3808315^3811250-3811424^3822909-3822993^3823613-3823740^3823883-3824135^3824270-	sex-biased (female)	3
SE@PGAP2@chr11@+@3808315^3824270-@3808315^3811250-3811424^3822909-3822993^3823883-3824135^3824270-	sex-biased (female)	3
SE@PGAP2@chr11@+@3808315^3824270-@3808315^3811250-3811424^3824270-	sex-biased (female)	3
SE@PGAP2@chr11@+@3808315^3824270-@3808315^3822909-3822993^3823613-3823740^3823883-3824135^3824270-	sex-biased (female)	3
SE@PGAP2@chr11@+@3808315^3824270-@3808315^3823613-3823740^3823883-3824135^3824270-	sex-biased (female)	3
SE@PIGB@chr15@+@55319413^55327531-@55319413^55320275-55320410^55321270-55321390^55327531-	sex-biased (female)	3
SE@PIGB@chr15@+@55319413^55327531-@55319413^55320275-55320410^55321300-55321390^55327531-	sex-biased (female)	3
SE@PLD3@chr19@+@40348724^40366419-@40348724^40365553-40365585^40366419-	sex-biased (female)	3
SE@POLK@chr5@+@75590440^75596222-@75590440^75593966-75594049^75596222-	sex-biased (female)	3
SE@PPIP5K2@chr5@+@103184744^103190842-@103184744^103186320-103186439^103187314-103187376^103189167-103189226^103190842-	sex-biased (female)	3
SE@PPIP5K2@chr5@+@103184744^103190842-@103184744^103186320-103186439^103187314-103187376^103190842-	sex-biased (female)	3
SE@PPIP5K2@chr5@+@103184744^103190842-@103184744^103186320-103186439^103190842-	sex-biased (female)	3
SE@PPP2R3C@chr14@-@35121902^35110629-@35121902^35117176-35117074^35116737-35116610^35110629-	sex-biased (female)	3
SE@PPP4R1@chr18@-@9563378^9562075-@9563378^9563046-9562922^9562075-	sex-biased (female)	3
SE@PRKCD@chr3@+@53161428^53173493-@53161428^53165104-53165215^53173493-	sex-biased (female)	3
SE@PRKCD@chr3@+@53161428^53178404-@53161428^53165104-53165215^53173493-53173608^53178404-	sex-biased (female)	3
SE@PRKCD@chr3@+@53161428^53178404-@53161428^53173493-53173608^53178404-	sex-biased (female)	3
SE@PRKCD@chr3@+@53161428^53178404-@53161428^53173527-53173608^53178404-	sex-biased (female)	3
SE@PRKD1@chr14@-@29663699^29638904-@29663699^29656499-29656476^29638904-	sex-biased (female)	3
SE@PRKD3@chr2@-@37324681^37293271-@37324681^37317179-37316237^37293271-	sex-biased (female)	3
SE@PTPN18@chr2@+@130358975^130369133-@130358975^130359233-130359309^130359397-130359492^130359608-130359646^130369133-	sex-biased (female)	3
SE@RABEPK@chr9@+@125207721^125220539-@125207721^125213370-125213522^125220327-125220397^125220539-	sex-biased (female)	3
SE@RCOR3@chr1@+@211304140^211313424-@211304140^211312720-211312835^211313424-	sex-biased (female)	3
SE@RCOR3@chr1@+@211304140^211313424-@211304140^211312720-211312961^211313424-	sex-biased (female)	3
SE@RHOT1@chr17@+@32208309^32253085-@32208309^32211116-32211238^32253085-	sex-biased (female)	3
SE@RNF8@chr6@+@37377033^37390742-@37377033^37381150-37381354^37390742-	sex-biased (female)	3
SE@RNMT@chr18@+@13726729^13731476-@13726729^13730627-13730755^13731476-	sex-biased (female)	3
SE@RPAIN@chr17@+@5422829^5432542-@5422829^5425971-5426082^5428071-5428211^5432542-	sex-biased (female)	3
SE@RPAIN@chr17@+@5422829^5432542-@5422829^5428071-5428211^5432542-	sex-biased (female)	3
SE@RREB1@chr6@+@7231907^7246424-@7231907^7240438-7240602^7246424-	sex-biased (female)	3
SE@RSRC1@chr3@+@158123991^158298039-@158123991^158132086-158132263^158203072-158203245^158298039-	sex-biased (female)	3
SE@SEC31B@chr10@-@100490706^100489761-@100490706^100490322-100490008^100489761-	sex-biased (female)	3
SE@SETD2@chr3@-@47083720^47067118-@47083720^47081083-47080801^47067118-	sex-biased (female)	3
SE@SGSM2@chr17@+@2365341^2371262-@2365341^2367271-2367405^2371262-	sex-biased (female)	3
SE@SH3YL1@chr2@-@262631^253115-@262631^260702-260085^253115-	sex-biased (female)	3
SE@SHC1@chr1@-@154974248^154970199-@154974248^154973508-154973293^154970199-	sex-biased (female)	3
SE@SIRT2@chr19@-@38899506^38893971-@38899506^38898425-38898379^38893971-	sex-biased (female)	3
SE@SLC11A1@chr2@+@218382375^218384243-@218382375^218382960-218383102^218384243-	sex-biased (female)	3
SE@SLC25A29@chr14@-@100298842^100293377-@100298842^100295697-100295626^100293377-	sex-biased (female)	3
SE@SLC25A29@chr14@-@100298842^100293377-@100298842^100295993-100295626^100293377-	sex-biased (female)	3
SE@SLC35E2B@chr1@-@1692449^1676846-@1692449^1691393-1690976^1676846-	sex-biased (female)	3
SE@SLC39A9@chr14@+@69424202^69453241-@69424202^69442069-69442266^69453241-	sex-biased (female)	3
SE@SLCO4A1@chr20@+@62667910^62668477-@62667910^62668012-62668184^62668477-	sex-biased (female)	3
SE@SLMAP@chr3@+@57864716^57890041-@57864716^57865242-57865292^57890041-	sex-biased (female)	3
SE@SP140L@chr2@+@230388633^230392087-@230388633^230389919-230390023^230392087-	sex-biased (female)	3
SE@SPAG9@chr17@-@51041501^51021365-@51041501^51031722-51031681^51021365-	sex-biased (female)	3
SE@SPOP@chr17@-@49677933^49622876-@49677933^49636809-49636759^49622876-	sex-biased (female)	3
SE@SRPK1@chr6@-@35870934^35869901-@35870934^35870494-35870281^35869901-	sex-biased (female)	3
SE@SRR@chr17@+@2304017^2317870-@2304017^2309777-2309990^2315557-2315728^2317870-	sex-biased (female)	3
SE@ST7L@chr1@-@112541951^112526111-@112541951^112540872-112540779^112526111-	sex-biased (female)	3
SE@ST7L@chr1@-@112541951^112526111-@112541951^112540872-112540779^112539275-112539159^112526111-	sex-biased (female)	3
SE@STIM2@chr4@+@27007700^27008428-@27007700^27007983-27008006^27008428-	sex-biased (female)	3
SE@STK38L@chr12@+@27297854^27302137-@27297854^27300554-27300601^27302137-	sex-biased (female)	3
SE@TBC1D23@chr3@+@100310542^100316099-@100310542^100311833-100311877^100316099-	sex-biased (female)	3
SE@TBCK@chr4@-@106260437^106252007-@106260437^106255047-106254947^106252007-	sex-biased (female)	3
SE@TCF3@chr19@-@1615686^1612433-@1615686^1615520-1615285^1612433-	sex-biased (female)	3
SE@TCF7L2@chr10@+@113158069^113159920-@113158069^113158667-113158717^113159920-	sex-biased (female)	3
SE@TCF7L2@chr10@+@113158069^113165555-@113158069^113159920-113159992^113160619-113160691^113161579-113161603^113165555-	sex-biased (female)	3
SE@TCF7L2@chr10@+@113158069^113165555-@113158069^113159920-113159992^113165555-	sex-biased (female)	3
SE@TLDC2@chr20@+@36887528^36892862-@36887528^36889251-36889403^36892862-	sex-biased (female)	3
SE@TM2D3@chr15@-@101652271^101650161-@101652271^101651773-101651696^101650161-	sex-biased (female)	3
SE@TMEM150A@chr2@-@85601021^85600018-@85601021^85600412-85600345^85600018-	sex-biased (female)	3
SE@TMEM175@chr4@+@932540^950421-@932540^947709-947892^948116-948154^948511-948615^950421-	sex-biased (female)	3
SE@TMEM175@chr4@+@932540^950421-@932540^947709-947892^948116-948615^950421-	sex-biased (female)	3
SE@TMEM175@chr4@+@948154^950421-@948154^948411-948615^950421-	sex-biased (female)	3
SE@TMEM175@chr4@+@948154^950421-@948154^948511-948615^950421-	sex-biased (female)	3
SE@TRERF1@chr6@-@42264704^42259723-@42264704^42263568-42263320^42259723-	sex-biased (female)	3
SE@TRIM16@chr17@-@15677176^15642816-@15677176^15651946-15651091^15642816-	sex-biased (female)	3
SE@TRIP12@chr2@-@229879982^229859574-@229879982^229860531-229860406^229859574-	sex-biased (female)	3
SE@TSPAN9@chr12@+@3077453^3201177-@3077453^3083653-3083719^3201177-	sex-biased (female)	3
SE@U2AF1@chr21@-@43101366^43095743-@43101366^43100519-43100453^43095743-	sex-biased (female)	3
SE@UMPS@chr3@+@124730627^124737568-@124730627^124731506-124731604^124735093-124735246^124737568-	sex-biased (female)	3
SE@WARS1@chr14@-@100375283^100369258-@100375283^100374149-100374136^100369258-	sex-biased (female)	3
SE@WARS1@chr14@-@100375283^100369258-@100375283^100374179-100374136^100369258-	sex-biased (female)	3
SE@WARS1@chr14@-@100375283^100369258-@100375283^100374220-100374136^100369258-	sex-biased (female)	3
SE@WARS1@chr14@-@100375283^100369258-@100375283^100374244-100374136^100369258-	sex-biased (female)	3
SE@WARS1@chr14@-@100375283^100369258-@100375283^100374265-100374136^100369258-	sex-biased (female)	3
SE@WARS1@chr14@-@100376260^100369258-@100376260^100374244-100374136^100369258-	sex-biased (female)	3
SE@WARS1@chr14@-@100376260^100369258-@100376260^100375406-100375283^100374244-100374136^100369258-	sex-biased (female)	3
SE@WARS1@chr14@-@100376260^100369258-@100376260^100375406-100375283^100374265-100374136^100369258-	sex-biased (female)	3
SE@WARS1@chr14@-@100376260^100369258-@100376260^100375546-100375283^100374244-100374136^100369258-	sex-biased (female)	3
SE@WDR20@chr14@+@102140172^102208603-@102140172^102194938-102195120^102197755-102197847^102208603-	sex-biased (female)	3
SE@WDR20@chr14@+@102140172^102208603-@102140172^102194938-102195120^102208603-	sex-biased (female)	3
SE@WDR77@chr1@-@111442025^111441389-@111442025^111441604-111441499^111441389-	sex-biased (female)	3
SE@XPO6@chr16@-@28211366^28177332-@28211366^28209122-28208987^28181031-28180941^28177332-	sex-biased (female)	3
SE@XRRA1@chr11@-@74936884^74921347-@74936884^74933872-74933801^74930372-74930300^74921347-	sex-biased (female)	3
SE@XRRA1@chr11@-@74936884^74921347-@74936884^74933872-74933801^74930372-74930300^74927488-74927391^74921347-	sex-biased (female)	3
SE@ZFAND6@chr15@+@80072647^80120328-@80072647^80073266-80073330^80098416-80098578^80120328-	sex-biased (female)	3
SE@ZFAND6@chr15@+@80072647^80120328-@80072647^80075164-80075315^80098416-80098578^80120328-	sex-biased (female)	3
SE@ZNF138@chr7@+@64794571^64831451-@64794571^64814918-64815044^64830940-64831076^64831451-	sex-biased (female)	3
SE@ZNF138@chr7@+@64794571^64831451-@64794571^64814918-64815044^64831451-	sex-biased (female)	3
SE@ZNF608@chr5@-@124649610^124644661-@124649610^124649133-124646679^124644661-	sex-biased (female)	3
SE@ZNF75A@chr16@+@3305643^3311753-@3305643^3308313-3308836^3311753-	sex-biased (female)	3
SE@ZNF765@chr19@+@53398030^53423062-@53398030^53402065-53402191^53423062-	sex-biased (female)	3
SE@ZSWIM7@chr17@-@15999506^15987368-@15999506^15993778-15993757^15991104-15990865^15987368-	sex-biased (female)	3
A3SS@ACSL4@chrX@-@109696144^109683372-@109696144^109683375-	sex-biased (male)	3
A3SS@ARMCX2@chrX@-@101659076^101658525-@101659076^101658569-	sex-biased (male)	3
A3SS@C2CD3@chr11@-@74042054^74037623-@74042054^74037698-	sex-biased (male)	3
A3SS@CIART@chr1@+@150282618^150283514-@150282618^150283462-	sex-biased (male)	3
A3SS@DOCK10@chr2@-@224806126^224805502-@224806126^224805529-	sex-biased (male)	3
A3SS@DXO@chr6@-@31970912^31970752-@31970912^31970825-	sex-biased (male)	3
A3SS@DXO@chr6@-@31970912^31970752-31970606^31970478-@31970912^31970825-	sex-biased (male)	3
A3SS@FAM111A@chr11@+@59145856^59148836-@59145856^59148797-	sex-biased (male)	3
A3SS@FCSK@chr16@+@70474339^70474626-@70474339^70474528-	sex-biased (male)	3
A3SS@GPNMB@chr7@+@23260773^23266517-@23260773^23266481-	sex-biased (male)	3
A3SS@GPR137@chr11@+@64285380^64286657-@64285380^64286510-	sex-biased (male)	3
A3SS@HLCS@chr21@-@36759727^36756755-@36759727^36756980-	sex-biased (male)	3
A3SS@HTATSF1@chrX@+@136497439^136497676-@136497439^136497624-	sex-biased (male)	3
A3SS@IFI27@chr14@+@94110978^94111659-@94110978^94111625-	sex-biased (male)	3
A3SS@LAIR1@chr19@-@54364295^54361209-@54364295^54361243-	sex-biased (male)	3
A3SS@MAMSTR@chr19@-@48716705^48715797-@48716705^48715917-	sex-biased (male)	3
A3SS@MARK3@chr14@+@103467191^103468081-@103467191^103468033-	sex-biased (male)	3
A3SS@METAP2@chr12@+@95474330^95476143-@95474330^95476074-	sex-biased (male)	3
A3SS@METTL15@chr11@+@28290397^28296797-@28290397^28296753-	sex-biased (male)	3
A3SS@MPHOSPH9@chr12@-@123163014^123162192-@123163014^123162218-	sex-biased (male)	3
A3SS@NNT@chr5@+@43645510^43649147-@43645510^43647924-	sex-biased (male)	3
A3SS@NOC2L@chr1@-@955923^954082-@955923^954523-	sex-biased (male)	3
A3SS@PARD6A@chr16@+@67661677^67661896-@67661677^67661893-	sex-biased (male)	3
A3SS@PSME2@chr14@-@24146208^24145752-@24146208^24145896-	sex-biased (male)	3
A3SS@RBM33@chr7@+@155707068^155711203-@155707068^155711173-	sex-biased (male)	3
A3SS@SETD4@chr21@-@36060347^36058924-@36060347^36058973-	sex-biased (male)	3
A3SS@SH3GLB2@chr9@-@129021091^129015860-@129021091^129015864-	sex-biased (male)	3
A3SS@SLC26A6@chr3@-@48627946^48627052-@48627946^48627055-	sex-biased (male)	3
A3SS@SLC43A3@chr11@-@57425989^57425670-@57425989^57425709-	sex-biased (male)	3
A3SS@SMOC2@chr6@+@168543672^168547119-@168543672^168547086-	sex-biased (male)	3
A3SS@STK32A@chr5@+@147373294^147375090-@147373294^147375027-	sex-biased (male)	3
A3SS@TPM2@chr9@-@35685269^35684807-35684732^35684550-@35685269^35685139-	sex-biased (male)	3
A3SS@TREM2@chr6@-@41159792^41159066-@41159792^41159106-	sex-biased (male)	3
A3SS@USP19@chr3@-@49117947^49117785-@49117947^49117830-	sex-biased (male)	3
A3SS@USP40@chr2@-@233542268^233540766-@233542268^233540769-	sex-biased (male)	3
A3SS@ZNF185@chrX@+@152920411^152920710-@152920411^152920707-	sex-biased (male)	3
A5SS@ARIH2@chr3@+@48924839^48927462-@48924971^48927462-	sex-biased (male)	3
A5SS@CAMK2D@chr4@-@113457335^113454515-@113457291^113454515-	sex-biased (male)	3
A5SS@CD300A@chr17@+@74481326^74484001-@74481833^74484001-	sex-biased (male)	3
A5SS@CDKN2AIP@chr4@+@183445634^183446088-@183445665^183446088-	sex-biased (male)	3
A5SS@CLCN2@chr3@-@184353662^184353422-@184353542^184353422-	sex-biased (male)	3
A5SS@CTC1@chr17@-@8229302^8228892-@8229142^8228892-	sex-biased (male)	3
A5SS@CUL2@chr10@-@35090430^35071339-@35090179^35071339-	sex-biased (male)	3
A5SS@EPSTI1@chr13@-@42926391^42917624-@42926336^42919332-42919300^42917624-	sex-biased (male)	3
A5SS@FCF1@chr14@+@74713200^74713485-@74713259^74713485-	sex-biased (male)	3
A5SS@FCGRT@chr19@+@49514133^49524507-@49514486^49521695-49521813^49524507-	sex-biased (male)	3
A5SS@FES@chr15@+@90884544^90885037-@90884639^90885037-	sex-biased (male)	3
A5SS@MICALL1@chr22@+@37927820^37931799-@37927826^37931799-	sex-biased (male)	3
A5SS@MSTO1@chr1@+@155613733^155614059-@155613766^155614059-	sex-biased (male)	3
A5SS@NDUFS8@chr11@+@68030877^68032152-@68030961^68032152-	sex-biased (male)	3
A5SS@NPIPB5@chr16@+@22513600^22513764-@22513610^22513764-	sex-biased (male)	3
A5SS@ODF2@chr9@+@128461010^128469183-@128461067^128469183-	sex-biased (male)	3
A5SS@PEX1@chr7@-@92518995^92518255-@92518960^92518255-	sex-biased (male)	3
A5SS@PSEN1@chr14@+@73148094^73170797-@73148106^73170797-	sex-biased (male)	3
A5SS@PTBP2@chr1@+@96804939^96806866-@96806452^96806866-	sex-biased (male)	3
A5SS@RBBP5@chr1@-@205094987^205088815-@205094873^205088815-	sex-biased (male)	3
A5SS@SMG7@chr1@+@183542364^183544353-@183542502^183544353-	sex-biased (male)	3
A5SS@TRRAP@chr7@+@98983459^98984093-@98983492^98984093-	sex-biased (male)	3
A5SS@ULK3@chr15@-@74842539^74842420-@74842535^74842420-	sex-biased (male)	3
RI@AARS1@chr16@-@70254621^70254038-@70254620^70254622-70254038^70254040-	sex-biased (male)	3
RI@AARS1@chr16@-@70258033^70255836-@70258032^70258034-70255836^70255838-	sex-biased (male)	3
RI@ABCF3@chr3@+@184186654^184186796-@184186653^184186655-184186796^184186798-	sex-biased (male)	3
RI@ADA2@chr22@-@17191683^17190032-@17191682^17191684-17190032^17190034-	sex-biased (male)	3
RI@ALDH3B1@chr11@+@68015459^68018527-@68015458^68015460-68018527^68018529-	sex-biased (male)	3
RI@AMD1@chr6@+@110892443^110892735-@110892442^110892444-110892735^110892737-	sex-biased (male)	3
RI@BAP1@chr3@-@52406829^52406376-@52406828^52406830-52406376^52406378-	sex-biased (male)	3
RI@CD163@chr12@-@7487773^7487673-@7487772^7487774-7487673^7487675-	sex-biased (male)	3
RI@CDIPT@chr16@-@29861106^29860662-@29861105^29861107-29860662^29860664-	sex-biased (male)	3
RI@CHD8@chr14@-@21430801^21429335-@21430800^21430802-21429335^21429337-	sex-biased (male)	3
RI@CTPS1@chr1@+@40996068^40997394-@40996067^40996069-40997394^40997396-	sex-biased (male)	3
RI@DCTN1@chr2@-@74365515^74365241-@74365514^74365516-74365241^74365243-	sex-biased (male)	3
RI@DDX41@chr5@-@177516119^177515989-@177516118^177516120-177515989^177515991-	sex-biased (male)	3
RI@DGCR2@chr22@-@19041807^19041294-@19041806^19041808-19041294^19041296-	sex-biased (male)	3
RI@ECEL1@chr2@-@232485199^232485091-@232485198^232485200-232485091^232485093-	sex-biased (male)	3
RI@ELMOD3@chr2@+@85371209^85371440-@85371208^85371210-85371440^85371442-	sex-biased (male)	3
RI@ELMOD3@chr2@+@85390265^85390760-@85390264^85390266-85390760^85390762-	sex-biased (male)	3
RI@FAHD2B@chr2@-@97086139^97085861-@97086138^97086140-97085861^97085863-	sex-biased (male)	3
RI@FAM102A@chr9@-@127944615^127943237-@127944614^127944616-127943237^127943239-	sex-biased (male)	3
RI@FAN1@chr15@+@30925291^30925789-@30925290^30925292-30925789^30925791-	sex-biased (male)	3
RI@FNDC4@chr2@-@27494351^27494134-@27494350^27494352-27494134^27494136-	sex-biased (male)	3
RI@FXYD5@chr19@+@35166171^35166251-@35166170^35166172-35166251^35166253-	sex-biased (male)	3
RI@G3BP2@chr4@-@75647029^75646456-@75647028^75647030-75646456^75646458-	sex-biased (male)	3
RI@GBA@chr1@-@155235681^155235311-@155235680^155235682-155235311^155235313-	sex-biased (male)	3
RI@GBF1@chr10@+@102352518^102353600-@102352517^102352519-102353600^102353602-	sex-biased (male)	3
RI@GBF1@chr10@+@102358729^102359270-@102358728^102358730-102359270^102359272-	sex-biased (male)	3
RI@GBF1@chr10@+@102362664^102363256-@102362663^102362665-102363256^102363258-	sex-biased (male)	3
RI@GBF1@chr10@+@102376800^102376935-@102376799^102376801-102376935^102376937-	sex-biased (male)	3
RI@GBF1@chr10@+@102379651^102379853-@102379650^102379652-102379853^102379855-	sex-biased (male)	3
RI@GBF1@chr10@+@102379954^102380249-@102379953^102379955-102380249^102380251-	sex-biased (male)	3
RI@GBF1@chr10@+@102380362^102380506-@102380361^102380363-102380506^102380508-	sex-biased (male)	3
RI@GLG1@chr16@-@74463356^74462630-@74463355^74463357-74462630^74462632-	sex-biased (male)	3
RI@GNPTG@chr16@+@1352159^1352239-@1352158^1352160-1352239^1352241-	sex-biased (male)	3
RI@GPATCH2L@chr14@+@76173625^76176623-@76173624^76173626-76176623^76176625-	sex-biased (male)	3
RI@GSDMD@chr8@+@143559552^143559777-@143559551^143559553-143559777^143559779-	sex-biased (male)	3
RI@GSDMD@chr8@+@143561104^143561370-@143561103^143561105-143561370^143561372-	sex-biased (male)	3
RI@GSDMD@chr8@+@143562131^143562209-@143562130^143562132-143562209^143562211-	sex-biased (male)	3
RI@HNRNPU@chr1@-@244862461^244860474-@244862460^244862462-244860474^244860476-	sex-biased (male)	3
RI@IDE@chr10@-@92470254^92468990-@92470253^92470255-92468990^92468992-	sex-biased (male)	3
RI@IFI44@chr1@+@78655209^78655362-@78655208^78655210-78655362^78655364-	sex-biased (male)	3
RI@IFT22@chr7@-@101318956^101318213-@101318955^101318957-101318213^101318215-	sex-biased (male)	3
RI@IL32@chr16@+@3065494^3065781-@3065493^3065495-3065781^3065783-	sex-biased (male)	3
RI@IL32@chr16@+@3065687^3065784-@3065686^3065688-3065784^3065786-	sex-biased (male)	3
RI@IL32@chr16@+@3067415^3067554-@3067414^3067416-3067554^3067556-	sex-biased (male)	3
RI@INTS3@chr1@+@153772440^153772639-@153772439^153772441-153772639^153772641-	sex-biased (male)	3
RI@INTS8@chr8@+@94867196^94867276-@94867195^94867197-94867276^94867278-	sex-biased (male)	3
RI@KIAA1217@chr10@+@24545103^24545827-@24545102^24545104-24545827^24545829-	sex-biased (male)	3
RI@KLHL21@chr1@-@6595485^6593658-@6595484^6595486-6593658^6593660-	sex-biased (male)	3
RI@LDLRAP1@chr1@+@25563791^25565173-@25563790^25563792-25565173^25565175-	sex-biased (male)	3
RI@LMNA@chr1@+@156137743^156138488-@156137742^156137744-156138488^156138490-	sex-biased (male)	3
RI@MACF1@chr1@+@39484730^39485538-@39484729^39484731-39485538^39485540-	sex-biased (male)	3
RI@MAT2A@chr2@+@85542373^85542565-@85542372^85542374-85542565^85542567-	sex-biased (male)	3
RI@MBD1@chr18@-@50276832^50276744-@50276831^50276833-50276744^50276746-	sex-biased (male)	3
RI@MCRS1@chr12@-@49566722^49566215-@49566721^49566723-49566215^49566217-	sex-biased (male)	3
RI@MKRN1@chr7@-@140455790^140455233-@140455789^140455791-140455233^140455235-	sex-biased (male)	3
RI@MPDU1@chr17@+@7586777^7586899-@7586776^7586778-7586899^7586901-	sex-biased (male)	3
RI@MPV17@chr2@-@27312494^27312246-@27312493^27312495-27312246^27312248-	sex-biased (male)	3
RI@MTA1@chr14@+@105450184^105450261-@105450183^105450185-105450261^105450263-	sex-biased (male)	3
RI@NEU1@chr6@-@31861188^31860621-@31861187^31861189-31860621^31860623-	sex-biased (male)	3
RI@NFKBIA@chr14@-@35402771^35402663-@35402770^35402772-35402663^35402665-	sex-biased (male)	3
RI@NGLY1@chr3@-@25737334^25736400-@25737333^25737335-25736400^25736402-	sex-biased (male)	3
RI@NIT1@chr1@+@161119388^161119509-@161119387^161119389-161119509^161119511-	sex-biased (male)	3
RI@NIT2@chr3@+@100345678^100346181-@100345677^100345679-100346181^100346183-	sex-biased (male)	3
RI@NOP56@chr20@+@2657218^2657929-@2657217^2657219-2657929^2657931-	sex-biased (male)	3
RI@NSG1@chr4@+@4386643^4387119-@4386642^4386644-4387119^4387121-	sex-biased (male)	3
RI@NT5C2@chr10@-@103098931^103097374-@103098930^103098932-103097374^103097376-	sex-biased (male)	3
RI@PAF1@chr19@-@39390260^39390161-@39390259^39390261-39390161^39390163-	sex-biased (male)	3
RI@PCBP4@chr3@-@51960189^51960023-@51960188^51960190-51960023^51960025-	sex-biased (male)	3
RI@PCBP4@chr3@-@51960866^51960642-@51960865^51960867-51960642^51960644-	sex-biased (male)	3
RI@PIGT@chr20@+@45418979^45419295-@45418978^45418980-45419295^45419297-	sex-biased (male)	3
RI@PPIE@chr1@+@39741921^39743216-@39741920^39741922-39743216^39743218-	sex-biased (male)	3
RI@PRPF31@chr19@+@54128200^54128305-@54128199^54128201-54128305^54128307-	sex-biased (male)	3
RI@PRPF31@chr19@+@54129185^54129272-@54129184^54129186-54129272^54129274-	sex-biased (male)	3
RI@PRPF40B@chr12@+@49633124^49633427-@49633123^49633125-49633427^49633429-	sex-biased (male)	3
RI@PSMD8@chr19@+@38376232^38376352-@38376231^38376233-38376352^38376354-	sex-biased (male)	3
RI@RASAL1@chr12@-@113128065^113127873-@113128064^113128066-113127873^113127875-	sex-biased (male)	3
RI@RGS4@chr1@+@163072499^163072805-@163072498^163072500-163072805^163072807-	sex-biased (male)	3
RI@RNF207@chr1@+@6209343^6209414-@6209342^6209344-6209414^6209416-	sex-biased (male)	3
RI@RPS9@chr19@+@54206462^54206553-@54206461^54206463-54206553^54206555-	sex-biased (male)	3
RI@RPS9@chr19@+@54206724^54207398-@54206723^54206725-54207398^54207400-	sex-biased (male)	3
RI@SGSM2@chr17@+@2362905^2362989-@2362904^2362906-2362989^2362991-	sex-biased (male)	3
RI@SGTA@chr19@-@2767580^2767220-@2767579^2767581-2767220^2767222-	sex-biased (male)	3
RI@SHMT2@chr12@+@57234110^57234234-@57234109^57234111-57234234^57234236-	sex-biased (male)	3
RI@SLC38A7@chr16@-@58676289^58676054-@58676288^58676290-58676054^58676056-	sex-biased (male)	3
RI@STRN4@chr19@-@46722242^46722072-@46722241^46722243-46722072^46722074-	sex-biased (male)	3
RI@TAF6@chr7@-@100113616^100113405-@100113615^100113617-100113405^100113407-	sex-biased (male)	3
RI@TATDN1@chr8@-@124495472^124493959-@124495471^124495473-124493959^124493961-	sex-biased (male)	3
RI@TRNAU1AP@chr1@+@28560732^28561346-@28560731^28560733-28561346^28561348-	sex-biased (male)	3
RI@TSPAN1@chr1@+@46184397^46184594-@46184396^46184398-46184594^46184596-	sex-biased (male)	3
RI@TTC31@chr2@+@74492229^74492304-@74492228^74492230-74492304^74492306-	sex-biased (male)	3
RI@UNC45A@chr15@+@90935982^90936285-@90935981^90935983-90936285^90936287-	sex-biased (male)	3
RI@WASH6P@chrX@+@156022145^156022323-@156022144^156022146-156022323^156022325-	sex-biased (male)	3
RI@WASH6P@chrX@+@156022459^156022699-@156022458^156022460-156022699^156022701-	sex-biased (male)	3
SE@AASDH@chr4@-@56387362^56382597-@56387362^56384341-56384070^56382597-	sex-biased (male)	3
SE@ABCA2@chr9@-@137024143^137023052-@137024143^137023840-137023838^137023052-	sex-biased (male)	3
SE@ABCB8@chr7@+@151028610^151034273-@151028610^151028780-151028852^151033605-151033917^151034273-	sex-biased (male)	3
SE@ABCB8@chr7@+@151028610^151034273-@151028610^151031241-151031291^151033605-151033917^151034273-	sex-biased (male)	3
SE@ACIN1@chr14@-@23069476^23066008-@23069476^23068671-23067314^23066008-	sex-biased (male)	3
SE@ACOX2@chr3@-@58531251^58528956-@58531251^58530638-58530466^58528956-	sex-biased (male)	3
SE@ADGRL2@chr1@+@81985355^81990391-@81985355^81987289-81987341^81990391-	sex-biased (male)	3
SE@AL049779.1@chr14@-@67685015^67662535-@67685015^67663190-67663029^67662535-	sex-biased (male)	3
SE@AL133352.1@chr10@-@100526399^100516960-@100526399^100524139-100523977^100516960-	sex-biased (male)	3
SE@ALG13@chrX@+@111720170^111723798-@111720170^111721603-111721711^111723798-	sex-biased (male)	3
SE@AP4M1@chr7@+@100101968^100103409-@100101968^100102246-100102393^100102675-100102781^100102864-100102960^100103409-	sex-biased (male)	3
SE@AP4M1@chr7@+@100101968^100103409-@100101968^100102675-100102746^100103409-	sex-biased (male)	3
SE@AP4M1@chr7@+@100101968^100103409-@100101968^100102675-100102781^100103409-	sex-biased (male)	3
SE@APOL3@chr22@-@36160669^36145599-@36160669^36149142-36149046^36145599-	sex-biased (male)	3
SE@APOL3@chr22@-@36160669^36145599-@36160669^36149371-36149046^36145599-	sex-biased (male)	3
SE@APOL3@chr22@-@36160669^36145599-@36160669^36149371-36149259^36149142-36149046^36145599-	sex-biased (male)	3
SE@APOL3@chr22@-@36160669^36145599-@36160669^36153423-36153285^36149371-36149259^36149142-36149046^36145599-	sex-biased (male)	3
SE@APOL3@chr22@-@36160669^36145599-@36160669^36157006-36156844^36149142-36149046^36145599-	sex-biased (male)	3
SE@ARHGAP12@chr10@-@31843461^31831800-@31843461^31839711-31839637^31831800-	sex-biased (male)	3
SE@ARHGAP12@chr10@-@31843461^31831800-@31843461^31839711-31839637^31839319-31839305^31831800-	sex-biased (male)	3
SE@ARIH2@chr3@+@48922811^48927462-@48922811^48924718-48924839^48927462-	sex-biased (male)	3
SE@ARIH2@chr3@+@48927813^48961612-@48927813^48945136-48945181^48961612-	sex-biased (male)	3
SE@ARVCF@chr22@-@19971886^19970743-@19971886^19971335-19971216^19970743-	sex-biased (male)	3
SE@ATF7IP2@chr16@+@10386122^10428868-@10386122^10387144-10387290^10387378-10387484^10414574-10414612^10419581-10419623^10428868-	sex-biased (male)	3
SE@ATF7IP2@chr16@+@10386122^10428868-@10386122^10387144-10387290^10387378-10387494^10414574-10414612^10419581-10419623^10428868-	sex-biased (male)	3
SE@ATF7IP2@chr16@+@10386122^10428868-@10386122^10414574-10414612^10419581-10419623^10428868-	sex-biased (male)	3
SE@ATF7IP2@chr16@+@10386122^10428868-@10386122^10419581-10419623^10428868-	sex-biased (male)	3
SE@ATG13@chr11@+@46617890^46644279-@46617890^46618325-46618375^46621042-46621157^46630045-46630100^46644279-	sex-biased (male)	3
SE@ATG13@chr11@+@46617890^46644279-@46617890^46618325-46618375^46630045-46630100^46644279-	sex-biased (male)	3
SE@ATG13@chr11@+@46617890^46644279-@46617890^46630045-46630100^46630897-46630991^46644279-	sex-biased (male)	3
SE@ATG13@chr11@+@46617890^46644279-@46617890^46630045-46630100^46644279-	sex-biased (male)	3
SE@ATG4D@chr19@+@10545130^10548904-@10545130^10546839-10547071^10547189-10547253^10548904-	sex-biased (male)	3
SE@ATG4D@chr19@+@10545130^10548904-@10545130^10546839-10547082^10547189-10547253^10548904-	sex-biased (male)	3
SE@ATG4D@chr19@+@10545130^10548904-@10545130^10547189-10547253^10548904-	sex-biased (male)	3
SE@ATXN2@chr12@-@111470108^111457359-@111470108^111464715-111464662^111457359-	sex-biased (male)	3
SE@BBIP1@chr10@-@110919121^110901612-@110919121^110907836-110907680^110901612-	sex-biased (male)	3
SE@BBIP1@chr10@-@110919121^110901612-@110919121^110918213-110918121^110907836-110907680^110901612-	sex-biased (male)	3
SE@BBIP1@chr10@-@110919121^110901612-@110919121^110918213-110918121^110908551-110908524^110901612-	sex-biased (male)	3
SE@BBIP1@chr10@-@110919121^110901612-@110919121^110918213-110918121^110911039-110910750^110901612-	sex-biased (male)	3
SE@CADM1@chr11@-@115209574^115178775-@115209574^115198438-115198406^115178775-	sex-biased (male)	3
SE@CADM1@chr11@-@115209574^115178775-@115209574^115198438-115198406^115190941-115190888^115178775-	sex-biased (male)	3
SE@CCDC66@chr3@+@56571302^56592970-@56571302^56572337-56572428^56592970-	sex-biased (male)	3
SE@CCNL2@chr1@-@1388950^1388065-@1388950^1388743-1388626^1388065-	sex-biased (male)	3
SE@CD22@chr19@+@35329230^35340881-@35329230^35332019-35332074^35332547-35332924^35336036-35336341^35337755-35338021^35340881-	sex-biased (male)	3
SE@CD22@chr19@+@35329230^35340881-@35329230^35332019-35332074^35332547-35332924^35336036-35336341^35340881-	sex-biased (male)	3
SE@CD300A@chr17@+@74481326^74484001-@74481326^74481726-74481833^74484001-	sex-biased (male)	3
SE@CD99L2@chrX@-@150831231^150795486-@150831231^150829604-150828306^150816078-150816007^150814936-150814862^150795486-	sex-biased (male)	3
SE@CDC42BPB@chr14@-@102954602^102952603-@102954602^102954275-102954198^102952603-	sex-biased (male)	3
SE@CLASP2@chr3@-@33559307^33551395-@33559307^33559175-33559125^33551395-	sex-biased (male)	3
SE@CLCN6@chr1@+@11828219^11829196-@11828219^11828458-11828624^11829196-	sex-biased (male)	3
SE@CLHC1@chr2@-@55206270^55177781-@55206270^55180712-55180510^55177781-	sex-biased (male)	3
SE@CLHC1@chr2@-@55206270^55177781-@55206270^55181744-55181570^55180712-55180510^55177781-	sex-biased (male)	3
SE@CLK2@chr1@-@155269488^155268359-@155269488^155268792-155268708^155268359-	sex-biased (male)	3
SE@CLK2@chr1@-@155269488^155268359-@155269488^155268795-155268708^155268359-	sex-biased (male)	3
SE@CNN2@chr19@+@1032696^1036416-@1032696^1036067-1036246^1036416-	sex-biased (male)	3
SE@CREM@chr10@+@35127193^35178889-@35127193^35137782-35137879^35148368-35148491^35175853-35175999^35178889-	sex-biased (male)	3
SE@CREM@chr10@+@35179276^35206895-@35179276^35201451-35201486^35206895-	sex-biased (male)	3
SE@CREM@chr10@+@35188388^35206895-@35188388^35201451-35201486^35206895-	sex-biased (male)	3
SE@CREM@chr10@+@35196099^35206895-@35196099^35201451-35201486^35206895-	sex-biased (male)	3
SE@CXXC5@chr5@+@139648845^139680364-@139648845^139679847-139679940^139680364-	sex-biased (male)	3
SE@CYTH1@chr17@-@78698269^78692493-@78698269^78696009-78696007^78692493-	sex-biased (male)	3
SE@DENND4C@chr9@+@19336414^19340992-@19336414^19336686-19336832^19337601-19337672^19340992-	sex-biased (male)	3
SE@DISP1@chr1@+@222815078^222835119-@222815078^222823856-222823945^222827428-222827601^222835119-	sex-biased (male)	3
SE@DISP1@chr1@+@222823945^222835119-@222823945^222824200-222824339^222827428-222827601^222835119-	sex-biased (male)	3
SE@DMTF1@chr7@+@87154528^87163495-@87154528^87163239-87163332^87163495-	sex-biased (male)	3
SE@DNAH1@chr3@+@52397877^52398850-@52397877^52398032-52398162^52398850-	sex-biased (male)	3
SE@DNAJC13@chr3@+@132483577^132484588-@132483577^132484363-132484488^132484588-	sex-biased (male)	3
SE@E2F6@chr2@-@11465772^11453798-@11465772^11457233-11457179^11453798-	sex-biased (male)	3
SE@E2F6@chr2@-@11465772^11453798-@11465772^11458351-11458281^11457233-11457179^11453798-	sex-biased (male)	3
SE@EBPL@chr13@-@49691254^49663195-@49691254^49686595-49686475^49669846-49669777^49663195-	sex-biased (male)	3
SE@EDIL3@chr5@-@84254084^84180521-@84254084^84229884-84229855^84180521-	sex-biased (male)	3
SE@ELP2@chr18@+@36138426^36141137-@36138426^36138795-36138872^36139419-36139613^36141137-	sex-biased (male)	3
SE@EPB41@chr1@+@29053312^29064982-@29053312^29060422-29060484^29064982-	sex-biased (male)	3
SE@EPB41L2@chr6@-@130878104^130870126-@130878104^130876775-130876674^130870381-130870328^130870126-	sex-biased (male)	3
SE@FAAP20@chr1@-@2193639^2185513-@2193639^2192975-2192845^2189781-2189713^2187206-2186838^2186249-2186004^2185513-	sex-biased (male)	3
SE@FADS6@chr17@-@74893352^74882710-@74893352^74892689-74892523^74882710-	sex-biased (male)	3
SE@FAM189B@chr1@-@155254653^155253732-@155254653^155254456-155254400^155253732-	sex-biased (male)	3
SE@FAM210A@chr18@-@13671862^13666713-@13671862^13670968-13670871^13666713-	sex-biased (male)	3
SE@FAM53C@chr5@+@138338307^138341809-@138338307^138341184-138341264^138341809-	sex-biased (male)	3
SE@FBXO4@chr5@+@41934308^41941192-@41934308^41939441-41939616^41941192-	sex-biased (male)	3
SE@FES@chr15@+@90885258^90886961-@90885258^90885412-90885585^90886961-	sex-biased (male)	3
SE@FGFR2@chr10@-@121593709^121551459-@121593709^121564579-121564502^121551459-	sex-biased (male)	3
SE@FHL2@chr2@-@105398842^105386540-@105398842^105396697-105396647^105386540-	sex-biased (male)	3
SE@FKRP@chr19@+@46748088^46755412-@46748088^46748515-46748621^46755412-	sex-biased (male)	3
SE@FKRP@chr19@+@46748088^46755412-@46748088^46748515-46748665^46748775-46748884^46755412-	sex-biased (male)	3
SE@FKRP@chr19@+@46748088^46755412-@46748088^46748515-46748665^46754102-46754181^46755412-	sex-biased (male)	3
SE@FKRP@chr19@+@46748088^46755412-@46748088^46748515-46748665^46755412-	sex-biased (male)	3
SE@FKRP@chr19@+@46748088^46755412-@46748088^46748515-46748717^46754249-46754315^46755412-	sex-biased (male)	3
SE@FKRP@chr19@+@46748088^46755412-@46748088^46748515-46748717^46755412-	sex-biased (male)	3
SE@FKRP@chr19@+@46748088^46755412-@46748088^46748515-46748884^46755412-	sex-biased (male)	3
SE@FLNB@chr3@+@58138529^58142650-@58138529^58141858-58141896^58142650-	sex-biased (male)	3
SE@FLNB@chr3@+@58138529^58142650-@58138529^58141858-58141929^58142650-	sex-biased (male)	3
SE@FNBP1@chr9@-@129924960^129908999-@129924960^129923996-129923844^129908999-	sex-biased (male)	3
SE@FNBP1@chr9@-@129924960^129908999-@129924960^129924026-129923844^129908999-	sex-biased (male)	3
SE@GLUL@chr1@-@182391175^182388750-@182391175^182390852-182390497^182388750-	sex-biased (male)	3
SE@GMIP@chr19@-@19634792^19634190-@19634792^19634703-19634507^19634190-	sex-biased (male)	3
SE@GORASP1@chr3@-@39107479^39101102-@39107479^39103553-39103473^39102881-39102693^39101570-39101510^39101102-	sex-biased (male)	3
SE@GRB10@chr7@-@50755887^50703908-@50755887^50705323-50705140^50703908-	sex-biased (male)	3
SE@GRB10@chr7@-@50755887^50703908-@50755887^50732368-50732272^50703908-	sex-biased (male)	3
SE@GRB10@chr7@-@50755887^50703908-@50755887^50732368-50732272^50710990-50710875^50705323-50705140^50703908-	sex-biased (male)	3
SE@GSE1@chr16@+@85613398^85648552-@85613398^85633914-85634132^85648552-	sex-biased (male)	3
SE@GUK1@chr1@+@228147699^228148665-@228147699^228148234-228148284^228148371-228148456^228148665-	sex-biased (male)	3
SE@HACL1@chr3@-@15589540^15582989-@15589540^15585342-15585248^15582989-	sex-biased (male)	3
SE@HACL1@chr3@-@15589540^15582989-@15589540^15586602-15586525^15585342-15585248^15582989-	sex-biased (male)	3
SE@IFI44L@chr1@+@78620571^78628951-@78620571^78627906-78628393^78628951-	sex-biased (male)	3
SE@IFT88@chr13@+@20567256^20574380-@20567256^20567670-20567997^20574380-	sex-biased (male)	3
SE@IFT88@chr13@+@20656430^20663498-@20656430^20663263-20663386^20663498-	sex-biased (male)	3
SE@IL18BP@chr11@+@71999019^71999927-@71999019^71999228-71999370^71999617-71999662^71999927-	sex-biased (male)	3
SE@IL18BP@chr11@+@71999019^71999927-@71999019^71999228-71999662^71999927-	sex-biased (male)	3
SE@INCENP@chr11@+@62141044^62144982-@62141044^62141500-62141511^62144982-	sex-biased (male)	3
SE@JADE1@chr4@+@128809877^128831733-@128809877^128816367-128816463^128831733-	sex-biased (male)	3
SE@KATNBL1@chr15@-@34209951^34163690-@34209951^34177999-34177821^34163690-	sex-biased (male)	3
SE@KDM5A@chr12@-@292759^285662-@292759^286207-286126^285662-	sex-biased (male)	3
SE@KLHL24@chr3@+@183635793^183650296-@183635793^183636221-183636311^183643480-183643542^183650296-	sex-biased (male)	3
SE@KLHL3@chr5@-@137638953^137634165-@137638953^137637395-137637294^137634165-	sex-biased (male)	3
SE@LRRC37A3@chr17@-@64859442^64855889-@64859442^64858883-64858779^64855889-	sex-biased (male)	3
SE@MAP3K7CL@chr21@+@29092581^29130795-@29092581^29109040-29109183^29130795-	sex-biased (male)	3
SE@MATR3@chr5@+@139279129^139314675-@139279129^139291972-139292074^139293453-139293575^139307239-139308327^139314675-	sex-biased (male)	3
SE@MBNL1@chr3@+@152447773^152456267-@152447773^152455542-152455577^152456267-	sex-biased (male)	3
SE@MED15@chr22@+@20568631^20582611-@20568631^20575113-20575232^20582611-	sex-biased (male)	3
SE@MFN2@chr1@+@11980484^11989165-@11980484^11981970-11982114^11982523-11982590^11989165-	sex-biased (male)	3
SE@MFSD8@chr4@-@127939853^127933093-@127939853^127938836-127938783^127933093-	sex-biased (male)	3
SE@MFSD8@chr4@-@127939853^127933093-@127939853^127939601-127939481^127938838-127938783^127933093-	sex-biased (male)	3
SE@MIEF1@chr22@+@39504534^39511288-@39504534^39509422-39509571^39511288-	sex-biased (male)	3
SE@MON2@chr12@+@62565380^62566322-@62565380^62566014-62566031^62566322-	sex-biased (male)	3
SE@MYO5A@chr15@-@52340196^52336556-@52340196^52337884-52337810^52336556-	sex-biased (male)	3
SE@NCAM1@chr11@+@113235164^113255877-@113235164^113236301-113236315^113240786-113240833^113242805-113242846^113243552-113243790^113246368-113246370^113255877-	sex-biased (male)	3
SE@NCAM1@chr11@+@113235164^113255877-@113235164^113236301-113236315^113240786-113240833^113242805-113242846^113246368-113246370^113255877-	sex-biased (male)	3
SE@NCAM1@chr11@+@113235164^113255877-@113235164^113236301-113236315^113240786-113240833^113246368-113246370^113255877-	sex-biased (male)	3
SE@NCOR1@chr17@-@16091863^16086442-@16091863^16087345-16087172^16086442-	sex-biased (male)	3
SE@NEK11@chr3@+@131243496^131349557-@131243496^131273478-131273574^131349557-	sex-biased (male)	3
SE@NLRX1@chr11@+@119171473^119172901-@119171473^119172356-119172425^119172901-	sex-biased (male)	3
SE@NPRL3@chr16@-@130522^123545-@130522^125073-124937^123545-	sex-biased (male)	3
SE@NRIP1@chr21@-@15064745^15014466-@15064745^15043574-15043495^15014466-	sex-biased (male)	3
SE@PDE9A@chr21@+@42699011^42733356-@42699011^42731770-42731949^42733356-	sex-biased (male)	3
SE@PHACTR2@chr6@+@143753912^143765261-@143753912^143760401-143760640^143765261-	sex-biased (male)	3
SE@PIGB@chr15@+@55321390^55327531-@55321390^55324780-55324834^55327531-	sex-biased (male)	3
SE@PIP5K1C@chr19@-@3638884^3633169-@3638884^3633520-3633437^3633169-	sex-biased (male)	3
SE@PLA2G6@chr22@-@38128269^38126449-@38128269^38127458-38127407^38126449-	sex-biased (male)	3
SE@PLAGL1@chr6@-@143960469^143942663-@143960469^143948460-143947985^143942663-	sex-biased (male)	3
SE@PLB1@chr2@+@28602921^28606496-@28602921^28603966-28604047^28604655-28604759^28605853-28605948^28606496-	sex-biased (male)	3
SE@POGZ@chr1@-@151442081^151430841-@151442081^151441086-151440928^151430841-	sex-biased (male)	3
SE@POLM@chr7@-@44074398^44074025-@44074398^44074220-44074131^44074025-	sex-biased (male)	3
SE@POLM@chr7@-@44074398^44074025-@44074398^44074233-44074131^44074025-	sex-biased (male)	3
SE@POLM@chr7@-@44080733^44079741-@44080733^44080471-44080365^44079959-44079861^44079741-	sex-biased (male)	3
SE@POU6F1@chr12@-@51204173^51198686-@51204173^51199868-51199747^51198686-	sex-biased (male)	3
SE@PPM1M@chr3@+@52246812^52247682-@52246812^52246974-52247228^52247682-	sex-biased (male)	3
SE@PPP2R5C@chr14@+@101810036^101836169-@101810036^101831701-101831804^101836169-	sex-biased (male)	3
SE@PPP2R5C@chr14@+@101912473^101925141-@101912473^101917831-101917947^101925141-	sex-biased (male)	3
SE@PRDM2@chr1@+@13749487^13816427-@13749487^13769118-13769173^13773078-13773188^13816427-	sex-biased (male)	3
SE@PRKDC@chr8@-@47782378^47779093-@47782378^47782254-47782162^47779093-	sex-biased (male)	3
SE@PRPF39@chr14@+@45096228^45096887-@45096228^45096424-45096492^45096596-45096758^45096887-	sex-biased (male)	3
SE@PRPF39@chr14@+@45096228^45096887-@45096228^45096424-45096758^45096887-	sex-biased (male)	3
SE@PRPF39@chr14@+@45096228^45096887-@45096228^45096596-45096758^45096887-	sex-biased (male)	3
SE@PRPF39@chr14@+@45109780^45110094-@45109780^45109894-45109993^45110094-	sex-biased (male)	3
SE@PSME3IP1@chr16@-@57185821^57173869-@57185821^57175590-57175539^57173869-	sex-biased (male)	3
SE@PTK2B@chr8@+@27444271^27450749-@27444271^27445794-27445919^27450749-	sex-biased (male)	3
SE@PTPRS@chr19@-@5238919^5222220-@5238919^5231615-5231310^5229684-5229491^5225844-5225727^5223297-5222689^5222220-	sex-biased (male)	3
SE@PTPRS@chr19@-@5238919^5222220-@5238919^5231615-5231310^5229684-5229491^5229342-5229316^5225844-5225727^5223297-5222689^5222220-	sex-biased (male)	3
SE@RAB11FIP5@chr2@-@73088050^73076182-@73088050^73081663-73079651^73076182-	sex-biased (male)	3
SE@RABL2A@chr2@+@113634232^113641353-@113634232^113635051-113635130^113641353-	sex-biased (male)	3
SE@RABL2A@chr2@+@113635130^113641353-@113635130^113640894-113641005^113641353-	sex-biased (male)	3
SE@RASGRP2@chr11@-@64740948^64740163-@64740948^64740446-64740368^64740163-	sex-biased (male)	3
SE@RBMS2@chr12@+@56562583^56569899-@56562583^56568975-56569033^56569899-	sex-biased (male)	3
SE@RCC1@chr1@+@28529939^28531803-@28529939^28530523-28530573^28531803-	sex-biased (male)	3
SE@RCC1@chr1@+@28529939^28531803-@28529939^28530523-28530615^28531803-	sex-biased (male)	3
SE@RCOR3@chr1@+@211304140^211312720-@211304140^211312355-211312487^211312720-	sex-biased (male)	3
SE@RGN@chrX@+@47084600^47091678-@47084600^47089776-47089991^47091678-	sex-biased (male)	3
SE@RIC8B@chr12@+@106860412^106885904-@106860412^106868301-106868423^106870823-106870942^106874481-106874567^106878987-106879125^106879775-106879947^106885904-	sex-biased (male)	3
SE@RRBP1@chr20@-@17682028^17660528-@17682028^17680075-17679999^17660528-	sex-biased (male)	3
SE@SBF1@chr22@-@50459255^50456673-@50459255^50457111-50457034^50456673-	sex-biased (male)	3
SE@SEC31A@chr4@-@82862534^82857764-@82862534^82861708-82861631^82857764-	sex-biased (male)	3
SE@SEPTIN6@chrX@-@119629318^119618786-@119629318^119625379-119625335^119618786-	sex-biased (male)	3
SE@SLIT2@chr4@+@20488982^20491761-@20488982^20490803-20490814^20491761-	sex-biased (male)	3
SE@SMPD4@chr2@-@130164374^130157396-@130164374^130161272-130161186^130157396-	sex-biased (male)	3
SE@SMPD4@chr2@-@130164374^130157396-@130164374^130161272-130161186^130159634-130159513^130157396-	sex-biased (male)	3
SE@SPATA18@chr4@+@52060897^52071917-@52060897^52062220-52062332^52069821-52069916^52071917-	sex-biased (male)	3
SE@SPATA18@chr4@+@52060897^52071917-@52060897^52062220-52062332^52071917-	sex-biased (male)	3
SE@SPATS2@chr12@+@49500205^49514555-@49500205^49512862-49512905^49514555-	sex-biased (male)	3
SE@SRSF4@chr1@-@29181646^29160517-@29181646^29168638-29168503^29166912-29166729^29166064-29165890^29160517-	sex-biased (male)	3
SE@ST3GAL5@chr2@-@85861181^85848204-@85861181^85853091-85852860^85851703-85851264^85848204-	sex-biased (male)	3
SE@ST3GAL5@chr2@-@85861181^85848204-@85861181^85853099-85852860^85851703-85851264^85848204-	sex-biased (male)	3
SE@STRN3@chr14@-@30935163^30913657-@30935163^30919106-30918966^30913657-	sex-biased (male)	3
SE@STRN3@chr14@-@30935163^30913657-@30935163^30929311-30929201^30919106-30918966^30913657-	sex-biased (male)	3
SE@SUCO@chr1@+@172575623^172577764-@172575623^172577539-172577559^172577764-	sex-biased (male)	3
SE@TAF1C@chr16@-@84186901^84184989-@84186901^84185583-84185480^84184989-	sex-biased (male)	3
SE@TBCK@chr4@-@106295094^106252007-@106295094^106262212-106262098^106260510-106260437^106255047-106254947^106252007-	sex-biased (male)	3
SE@TCEAL9@chrX@+@103356606^103357615-@103356606^103357083-103357161^103357615-	sex-biased (male)	3
SE@TCERG1@chr5@+@146463793^146469544-@146463793^146468341-146468403^146469544-	sex-biased (male)	3
SE@TDG@chr12@+@103982934^103983295-@103982934^103983136-103983218^103983295-	sex-biased (male)	3
SE@THAP12@chr11@-@76365852^76361063-@76365852^76364432-76364338^76361063-	sex-biased (male)	3
SE@THAP6@chr4@+@75516979^75539859-@75516979^75521736-75521861^75539859-	sex-biased (male)	3
SE@THEMIS2@chr1@+@27876728^27885295-@27876728^27879644-27880054^27881971-27882125^27882513-27883043^27885295-	sex-biased (male)	3
SE@THEMIS2@chr1@+@27876728^27885295-@27876728^27879644-27880054^27881971-27883043^27885295-	sex-biased (male)	3
SE@THEMIS2@chr1@+@27880054^27885295-@27880054^27881971-27883043^27885295-	sex-biased (male)	3
SE@TIRAP@chr11@+@126283153^126290803-@126283153^126290462-126290585^126290803-	sex-biased (male)	3
SE@TMEM159@chr16@+@21170605^21179475-@21170605^21174010-21174148^21177137-21177327^21179475-	sex-biased (male)	3
SE@TMEM164@chrX@+@110002772^110067347-@110002772^110003883-110004164^110067347-	sex-biased (male)	3
SE@TMEM200A@chr6@+@130366524^130440407-@130366524^130385173-130385236^130440407-	sex-biased (male)	3
SE@TOP1MT@chr8@-@143334740^143331339-@143334740^143332601-143332487^143331339-	sex-biased (male)	3
SE@TOP1MT@chr8@-@143334740^143331339-@143334740^143332657-143332487^143331339-	sex-biased (male)	3
SE@TOR2A@chr9@-@127735120^127733560-@127735120^127734564-127734299^127733560-	sex-biased (male)	3
SE@TPD52L2@chr20@+@63873816^63882719-@63873816^63875816-63875875^63882719-	sex-biased (male)	3
SE@TPM3@chr1@-@154170400^154159048-@154170400^154169383-154169305^154161778-154161642^154159048-	sex-biased (male)	3
SE@TRAPPC6B@chr14@-@39158285^39151839-@39158285^39154294-39154211^39151839-	sex-biased (male)	3
SE@TRIM33@chr1@-@114421436^114410316-@114421436^114420451-114420380^114410316-	sex-biased (male)	3
SE@TRNAU1AP@chr1@+@28560732^28561346-@28560732^28561113-28561260^28561346-	sex-biased (male)	3
SE@TTC13@chr1@-@230954333^230940556-@230954333^230945454-230945389^230943898-230943806^230940556-	sex-biased (male)	3
SE@UBR4@chr1@-@19141347^19139220-@19141347^19140892-19140788^19139220-	sex-biased (male)	3
SE@UGP2@chr2@+@63842599^63856306-@63842599^63855567-63855643^63856306-	sex-biased (male)	3
SE@USP3@chr15@+@63504830^63532647-@63504830^63529014-63529166^63532647-	sex-biased (male)	3
SE@USP33@chr1@-@77759643^77741748-@77759643^77745599-77745421^77741748-	sex-biased (male)	3
SE@USP33@chr1@-@77759643^77741748-@77759643^77746556-77746399^77745599-77745421^77741748-	sex-biased (male)	3
SE@USP36@chr17@-@78798400^78787658-@78798400^78796494-78796317^78787658-	sex-biased (male)	3
SE@USP4@chr3@-@49324702^49310737-@49324702^49311654-49311514^49310737-	sex-biased (male)	3
SE@USP8@chr15@+@50424514^50439009-@50424514^50432338-50432499^50439009-	sex-biased (male)	3
SE@VPS8@chr3@+@184870805^184886110-@184870805^184882349-184882433^184886110-	sex-biased (male)	3
SE@VSIG4@chrX@-@66033474^66028112-@66033474^66032749-66032468^66028112-	sex-biased (male)	3
SE@WARS1@chr14@-@100375283^100361921-@100375283^100374064-100373980^100369258-100369087^100361921-	sex-biased (male)	3
SE@WARS1@chr14@-@100375283^100361921-@100375283^100374149-100374136^100369258-100369087^100361921-	sex-biased (male)	3
SE@WARS1@chr14@-@100375283^100361921-@100375283^100374179-100374136^100369258-100369087^100361921-	sex-biased (male)	3
SE@WARS1@chr14@-@100375283^100361921-@100375283^100374220-100374136^100369258-100369087^100361921-	sex-biased (male)	3
SE@WARS1@chr14@-@100375283^100361921-@100375283^100374244-100374136^100369258-100369087^100361921-	sex-biased (male)	3
SE@WARS1@chr14@-@100375283^100361921-@100375283^100374265-100374136^100369258-100369087^100361921-	sex-biased (male)	3
SE@WWP2@chr16@+@69762391^69786996-@69762391^69776189-69776241^69783032-69783152^69786996-	sex-biased (male)	3
SE@ZC3H18@chr16@+@88586684^88598178-@88586684^88587542-88587613^88598178-	sex-biased (male)	3
SE@ZDHHC20@chr13@-@21381434^21376655-@21381434^21378738-21378661^21376655-	sex-biased (male)	3
SE@ZNF185@chrX@+@152922256^152928575-@152922256^152922720-152922809^152928575-	sex-biased (male)	3
SE@ZNF644@chr1@-@90982310^90918154-@90982310^90941309-90938272^90938090-90937485^90918154-	sex-biased (male)	3
A3SS@ABCA2@chr9@-@137024143^137023052-@137024143^137023840-	sex-common	4
A3SS@COL5A1@chr9@+@134825904^134830108-@134825904^134829976-	sex-common	4
A3SS@ECI2@chr6@-@4135511^4133701-@4135511^4133711-	sex-common	4
A3SS@PDLIM5@chr4@+@94573393^94575943-@94573393^94575616-	sex-common	4
A3SS@PPP1R12A@chr12@-@79781815^79778600-@79781815^79779351-	sex-common	4
A3SS@WSB1@chr17@+@27306882^27309100-@27306882^27307744-	sex-common	4
A5SS@GON4L@chr1@-@155775002^155773210-@155774963^155773210-	sex-common	4
A5SS@HDAC6@chrX@+@48818109^48820106-@48818412^48820106-	sex-common	4
A5SS@KLC1@chr14@+@103679518^103687081-@103679545^103687081-	sex-common	4
A5SS@SORBS2@chr4@-@185646700^185630598-@185646668^185630598-	sex-common	4
A5SS@SORBS2@chr4@-@185646700^185630598-@185646668^185635411-185635355^185630598-	sex-common	4
A5SS@SORBS2@chr4@-@185646700^185630598-@185646668^185639035-185638877^185635411-185635355^185630598-	sex-common	4
A5SS@SPACA6@chr19@+@51703335^51704030-@51703337^51704030-	sex-common	4
RI@CBLB@chr3@-@105681724^105681610-@105681723^105681725-105681610^105681612-	sex-common	4
RI@CELSR2@chr1@+@109271296^109271386-@109271295^109271297-109271386^109271388-	sex-common	4
RI@CELSR2@chr1@+@109271512^109271600-@109271511^109271513-109271600^109271602-	sex-common	4
RI@CELSR2@chr1@+@109272405^109272640-@109272404^109272406-109272640^109272642-	sex-common	4
RI@CELSR2@chr1@+@109272728^109272833-@109272727^109272729-109272833^109272835-	sex-common	4
RI@CHRD@chr3@+@184386159^184386492-@184386158^184386160-184386492^184386494-	sex-common	4
RI@CHRD@chr3@+@184386755^184386845-@184386754^184386756-184386845^184386847-	sex-common	4
RI@CKB@chr14@-@103522023^103521950-@103522022^103522024-103521950^103521952-	sex-common	4
RI@CKB@chr14@-@103522301^103522177-@103522300^103522302-103522177^103522179-	sex-common	4
RI@CLIC3@chr9@-@136995648^136995567-@136995647^136995649-136995567^136995569-	sex-common	4
RI@COL9A2@chr1@-@40312456^40312112-@40312455^40312457-40312112^40312114-	sex-common	4
RI@DDX23@chr12@-@48836894^48836794-@48836893^48836895-48836794^48836796-	sex-common	4
RI@EIF2B5@chr3@+@184140157^184140418-@184140156^184140158-184140418^184140420-	sex-common	4
RI@FAM131B@chr7@-@143359732^143359419-@143359731^143359733-143359419^143359421-	sex-common	4
RI@FAM133B@chr7@-@92578150^92577717-@92578149^92578151-92577717^92577719-	sex-common	4
RI@FAM98C@chr19@+@38405635^38406910-@38405634^38405636-38406910^38406912-	sex-common	4
RI@FANK1@chr10@+@126009266^126009373-@126009265^126009267-126009373^126009375-	sex-common	4
RI@FCGR2B@chr1@+@161674073^161677328-@161674072^161674074-161677328^161677330-	sex-common	4
RI@GPS1@chr17@+@82054049^82054510-@82054048^82054050-82054510^82054512-	sex-common	4
RI@HGS@chr17@+@81696747^81696824-@81696746^81696748-81696824^81696826-	sex-common	4
RI@KCNAB2@chr1@+@6087511^6089008-@6087510^6087512-6089008^6089010-	sex-common	4
RI@KRT18@chr12@+@52950410^52950750-@52950409^52950411-52950750^52950752-	sex-common	4
RI@LSR@chr19@+@35266738^35266836-@35266737^35266739-35266836^35266838-	sex-common	4
RI@MARCHF6@chr5@+@10400842^10402059-@10400841^10400843-10402059^10402061-	sex-common	4
RI@MMP23B@chr1@+@1633120^1633188-@1633119^1633121-1633188^1633190-	sex-common	4
RI@MMP23B@chr1@+@1633912^1633989-@1633911^1633913-1633989^1633991-	sex-common	4
RI@MTMR2@chr11@-@95865601^95862366-@95865600^95865602-95862366^95862368-	sex-common	4
RI@MYD88@chr3@+@38140568^38140757-@38140567^38140569-38140757^38140759-	sex-common	4
RI@OCEL1@chr19@+@17226869^17226994-@17226868^17226870-17226994^17226996-	sex-common	4
RI@PABPC4@chr1@-@39564423^39563741-@39564422^39564424-39563741^39563743-	sex-common	4
RI@PABPC4@chr1@-@39564686^39564542-@39564685^39564687-39564542^39564544-	sex-common	4
RI@PLD2@chr17@+@4808114^4808274-@4808113^4808115-4808274^4808276-	sex-common	4
RI@PLD2@chr17@+@4818106^4818297-@4818105^4818107-4818297^4818299-	sex-common	4
RI@PPP1R12A@chr12@-@79779321^79778600-@79779320^79779322-79778600^79778602-	sex-common	4
RI@QARS1@chr3@-@49098600^49098480-@49098599^49098601-49098480^49098482-	sex-common	4
RI@RBM25@chr14@+@73099750^73103192-@73099749^73099751-73103192^73103194-	sex-common	4
RI@RMND5B@chr5@+@178142728^178142852-@178142727^178142729-178142852^178142854-	sex-common	4
RI@SPNS2@chr17@+@4536174^4536263-@4536173^4536175-4536263^4536265-	sex-common	4
RI@SSC5D@chr19@+@55489032^55489354-@55489031^55489033-55489354^55489356-	sex-common	4
RI@SSX2IP@chr1@-@84662455^84662375-@84662454^84662456-84662375^84662377-	sex-common	4
RI@SSX2IP@chr1@-@84670646^84669893-@84670645^84670647-84669893^84669895-	sex-common	4
RI@TECR@chr19@+@14563702^14563800-@14563701^14563703-14563800^14563802-	sex-common	4
RI@TNXB@chr6@-@32042951^32042831-@32042950^32042952-32042831^32042833-	sex-common	4
SE@ABCA2@chr9@-@137024143^137023052-@137024143^137023840-137023838^137023052-	sex-common	4
SE@ACTN1@chr14@-@68878989^68877240-@68878989^68878523-68878458^68877240-	sex-common	4
SE@ATP2B4@chr1@+@203727571^203739546-@203727571^203733223-203733400^203739546-	sex-common	4
SE@CAMK2D@chr4@-@113509638^113500511-@113509638^113502977-113502936^113500511-	sex-common	4
SE@CD55@chr1@+@207339417^207359546-@207339417^207340391-207340508^207359546-	sex-common	4
SE@DCLK2@chr4@+@150249684^150256020-@150249684^150253474-150253556^150256020-	sex-common	4
SE@HDAC6@chrX@+@48818109^48820106-@48818109^48818220-48818412^48820106-	sex-common	4
SE@HDAC6@chrX@+@48818109^48822620-@48818109^48818220-48818412^48820106-48820255^48822620-	sex-common	4
SE@LRRFIP1@chr2@+@237749324^237753309-@237749324^237751200-237751271^237753309-	sex-common	4
SE@MICAL3@chr22@-@17885878^17872023-@17885878^17881303-17881205^17879402-17879346^17875554-17875447^17872854-17872747^17872023-	sex-common	4
SE@OGFOD3@chr17@-@82398196^82392534-@82398196^82394543-82394331^82392534-	sex-common	4
SE@PDLIM7@chr5@-@177491807^177491146-@177491807^177491420-177491404^177491146-	sex-common	4
SE@PPP1R12A@chr12@-@79781815^79778600-@79781815^79779351-79779321^79778600-	sex-common	4
SE@RPS24@chr10@+@78037441^78040204-@78037441^78037965-78037982^78040204-	sex-common	4
SE@SETD2@chr3@-@47083720^47067118-@47083720^47081083-47080801^47067118-	sex-common	4
SE@SLC11A1@chr2@+@218385266^218386635-@218385266^218385412-218385485^218386635-	sex-common	4
SE@SMNDC1@chr10@-@110303468^110298790-@110303468^110300736-110300547^110298790-	sex-common	4
SE@SORBS1@chr10@-@95421961^95414862-@95421961^95416185-95415469^95414862-	sex-common	4
SE@STEAP4@chr7@-@88306792^88284271-@88306792^88291014-88290916^88284271-	sex-common	4
SE@TAPT1@chr4@-@16174204^16166793-@16174204^16170729-16170653^16166793-	sex-common	4
SE@TNS1@chr2@-@217831455^217821938-@217831455^217829882-217829844^217821938-	sex-common	4
SE@TNS1@chr2@-@217831455^217821938-@217831455^217830390-217830367^217821938-	sex-common	4
SE@TNS1@chr2@-@217831455^217821938-@217831455^217830390-217830367^217829882-217829844^217821938-	sex-common	4
SE@VCL@chr10@+@74109156^74114184-@74109156^74111909-74112112^74114184-	sex-common	4
A3SS@AFF1@chr4@+@87047594^87084123-@87047594^87084120-	sex-biased (female)	4
A3SS@ANKRD36@chr2@+@97219246^97224809-@97219246^97224806-	sex-biased (female)	4
A3SS@DOCK10@chr2@-@224806126^224805502-@224806126^224805529-	sex-biased (female)	4
A3SS@FAM136A@chr2@-@70301925^70300980-@70301925^70301603-	sex-biased (female)	4
A3SS@GPR89B@chr1@+@147943544^147943997-@147943544^147943977-	sex-biased (female)	4
A3SS@HTT@chr4@+@3206983^3207286-@3206983^3207281-	sex-biased (female)	4
A3SS@IFFO1@chr12@-@6548425^6548157-@6548425^6548160-	sex-biased (female)	4
A3SS@IGF1R@chr15@+@98924684^98929561-@98924684^98929558-	sex-biased (female)	4
A3SS@LILRB5@chr19@-@54254365^54254065-@54254365^54254068-	sex-biased (female)	4
A3SS@LILRB5@chr19@-@54254365^54254065-54254018^54252987-@54254365^54254068-	sex-biased (female)	4
A3SS@METTL17@chr14@+@20990598^20992124-@20990598^20992092-	sex-biased (female)	4
A3SS@MUS81@chr11@+@65864815^65865115-@65864815^65865017-	sex-biased (female)	4
A3SS@PER1@chr17@-@8152337^8150610-@8152337^8150845-	sex-biased (female)	4
A3SS@REPS1@chr6@-@138920215^138917624-@138920215^138917627-	sex-biased (female)	4
A3SS@RPS24@chr10@+@78037304^78040201-@78037304^78037439-	sex-biased (female)	4
A3SS@RPS6KA4@chr11@+@64361745^64361907-@64361745^64361852-	sex-biased (female)	4
A3SS@RTCA@chr1@+@100266624^100268152-@100266624^100268074-	sex-biased (female)	4
A3SS@SCARF1@chr17@-@1636941^1636818-@1636941^1636855-	sex-biased (female)	4
A3SS@SH3BP2@chr4@+@2831679^2832331-@2831679^2831923-	sex-biased (female)	4
A3SS@SHANK3@chr22@+@50705096^50706072-@50705096^50705376-	sex-biased (female)	4
A3SS@SRPK3@chrX@+@153783251^153783755-@153783251^153783752-	sex-biased (female)	4
A3SS@STX5@chr11@-@62831954^62831110-@62831954^62831262-	sex-biased (female)	4
A3SS@TATDN3@chr1@+@212807848^212812251-@212807848^212812248-	sex-biased (female)	4
A3SS@THAP3@chr1@+@6628691^6630291-@6628691^6630288-	sex-biased (female)	4
A3SS@TMEM134@chr11@-@67468017^67467563-@67468017^67467590-	sex-biased (female)	4
A3SS@TPM1@chr15@+@63042943^63044027-@63042943^63043706-	sex-biased (female)	4
A3SS@TRIM26@chr6@-@30201035^30199153-@30201035^30199264-	sex-biased (female)	4
A3SS@TUBGCP5@chr15@-@23030885^23027306-@23030885^23027309-	sex-biased (female)	4
A3SS@XAF1@chr17@+@6758224^6759662-@6758224^6759256-	sex-biased (female)	4
A3SS@ZNF589@chr3@+@48260939^48267918-@48260939^48267915-	sex-biased (female)	4
A3SS@ZNF846@chr19@-@9763282^9762165-@9763282^9762168-	sex-biased (female)	4
A5SS@CEP170@chr1@-@243142367^243140107-@243142316^243140107-	sex-biased (female)	4
A5SS@CLASRP@chr19@+@45068054^45068420-@45068058^45068420-	sex-biased (female)	4
A5SS@EOGT@chr3@-@69012603^69011991-@69012368^69011991-	sex-biased (female)	4
A5SS@FAAP100@chr17@-@81551928^81551203-@81551732^81551203-	sex-biased (female)	4
A5SS@FES@chr15@+@90884544^90885037-@90884639^90885037-	sex-biased (female)	4
A5SS@GBP3@chr1@-@89014547^89014279-@89014405^89014279-	sex-biased (female)	4
A5SS@INTS11@chr1@-@1323147^1321093-@1322892^1321984-1321908^1321093-	sex-biased (female)	4
A5SS@INTS11@chr1@-@1323181^1321093-@1323147^1321093-	sex-biased (female)	4
A5SS@MAP4K4@chr2@+@101887237^101887778-@101887261^101887778-	sex-biased (female)	4
A5SS@MTRR@chr5@+@7873512^7875258-@7873526^7875258-	sex-biased (female)	4
A5SS@NABP1@chr2@+@191678241^191678990-@191678705^191678990-	sex-biased (female)	4
A5SS@PANK2@chr20@+@3908135^3910577-@3908278^3910577-	sex-biased (female)	4
A5SS@PARD3@chr10@-@34337365^34336243-@34337275^34336243-	sex-biased (female)	4
A5SS@RC3H2@chr9@-@122851100^122849822-@122851081^122849822-	sex-biased (female)	4
A5SS@RNF146@chr6@+@127266925^127280231-@127267095^127280231-	sex-biased (female)	4
A5SS@SORBS2@chr4@-@185646700^185630598-@185646668^185638162-185638079^185635411-185635355^185630598-	sex-biased (female)	4
A5SS@TMEM218@chr11@-@125102734^125101303-@125102637^125102317-125102132^125101303-	sex-biased (female)	4
A5SS@TMEM218@chr11@-@125102734^125101303-@125102637^125102351-125102132^125101303-	sex-biased (female)	4
A5SS@TPM1@chr15@+@63043831^63056985-@63044152^63056985-	sex-biased (female)	4
A5SS@VCPKMT@chr14@-@50116080^50115911-@50116069^50115911-	sex-biased (female)	4
A5SS@ZHX3@chr20@-@41202283^41185201-@41202057^41185201-	sex-biased (female)	4
RI@ABCG1@chr21@+@42288073^42288211-@42288072^42288074-42288211^42288213-	sex-biased (female)	4
RI@ACP2@chr11@-@47248038^47247727-@47248037^47248039-47247727^47247729-	sex-biased (female)	4
RI@ADCY4@chr14@-@24326299^24326165-@24326298^24326300-24326165^24326167-	sex-biased (female)	4
RI@ADD1@chr4@+@2908604^2909339-@2908603^2908605-2909339^2909341-	sex-biased (female)	4
RI@ADGRD1@chr12@+@130966546^130971458-@130966545^130966547-130971458^130971460-	sex-biased (female)	4
RI@ANXA4@chr2@+@69807996^69810594-@69807995^69807997-69810594^69810596-	sex-biased (female)	4
RI@ARHGEF4@chr2@+@131041462^131041815-@131041461^131041463-131041815^131041817-	sex-biased (female)	4
RI@ATP13A1@chr19@-@19645874^19645790-@19645873^19645875-19645790^19645792-	sex-biased (female)	4
RI@BCAM@chr19@+@44819726^44820705-@44819725^44819727-44820705^44820707-	sex-biased (female)	4
RI@BOC@chr3@+@113284567^113284782-@113284566^113284568-113284782^113284784-	sex-biased (female)	4
RI@BRF1@chr14@-@105212113^105211293-@105212112^105212114-105211293^105211295-	sex-biased (female)	4
RI@C12orf29@chr12@+@88043715^88045582-@88043714^88043716-88045582^88045584-	sex-biased (female)	4
RI@CAPRIN2@chr12@-@30720811^30719225-@30720810^30720812-30719225^30719227-	sex-biased (female)	4
RI@CASKIN2@chr17@-@75503659^75503527-@75503658^75503660-75503527^75503529-	sex-biased (female)	4
RI@CD163@chr12@-@7487773^7487673-@7487772^7487774-7487673^7487675-	sex-biased (female)	4
RI@CDK10@chr16@+@89693326^89693398-@89693325^89693327-89693398^89693400-	sex-biased (female)	4
RI@CLIC3@chr9@-@136995186^136995105-@136995185^136995187-136995105^136995107-	sex-biased (female)	4
RI@COPA@chr1@-@160333603^160332557-@160333602^160333604-160332557^160332559-	sex-biased (female)	4
RI@CPNE1@chr20@-@35626567^35626381-@35626566^35626568-35626381^35626383-	sex-biased (female)	4
RI@CTC1@chr17@-@8229302^8229206-@8229301^8229303-8229206^8229208-	sex-biased (female)	4
RI@CTSH@chr15@-@78922993^78922205-@78922992^78922994-78922205^78922207-	sex-biased (female)	4
RI@CTSH@chr15@-@78927713^78925440-@78927712^78927714-78925440^78925442-	sex-biased (female)	4
RI@CTSH@chr15@-@78932372^78931506-@78932371^78932373-78931506^78931508-	sex-biased (female)	4
RI@CTSH@chr15@-@78934978^78932458-@78934977^78934979-78932458^78932460-	sex-biased (female)	4
RI@CUEDC1@chr17@-@57867357^57866544-@57867356^57867358-57866544^57866546-	sex-biased (female)	4
RI@DCXR@chr17@-@82037450^82037013-@82037449^82037451-82037013^82037015-	sex-biased (female)	4
RI@DDX41@chr5@-@177516119^177515989-@177516118^177516120-177515989^177515991-	sex-biased (female)	4
RI@DGAT1@chr8@-@144317187^144317109-@144317186^144317188-144317109^144317111-	sex-biased (female)	4
RI@DGAT1@chr8@-@144318461^144318362-@144318460^144318462-144318362^144318364-	sex-biased (female)	4
RI@DYNC1H1@chr14@+@102016489^102016766-@102016488^102016490-102016766^102016768-	sex-biased (female)	4
RI@DYNC1LI1@chr3@-@32570625^32570419-@32570624^32570626-32570419^32570421-	sex-biased (female)	4
RI@DZIP3@chr3@+@108648112^108648918-@108648111^108648113-108648918^108648920-	sex-biased (female)	4
RI@ECH1@chr19@-@38816284^38816007-@38816283^38816285-38816007^38816009-	sex-biased (female)	4
RI@EFEMP1@chr2@-@55922571^55922447-@55922570^55922572-55922447^55922449-	sex-biased (female)	4
RI@EFNA1@chr1@+@155133568^155133730-@155133567^155133569-155133730^155133732-	sex-biased (female)	4
RI@FAM102A@chr9@-@127944615^127943237-@127944614^127944616-127943237^127943239-	sex-biased (female)	4
RI@FANK1@chr10@+@126009131^126009222-@126009130^126009132-126009222^126009224-	sex-biased (female)	4
RI@GBF1@chr10@+@102352518^102353600-@102352517^102352519-102353600^102353602-	sex-biased (female)	4
RI@GMFG@chr19@-@39329000^39328548-@39328999^39329001-39328548^39328550-	sex-biased (female)	4
RI@HARS1@chr5@-@140679002^140678015-@140679001^140679003-140678015^140678017-	sex-biased (female)	4
RI@HDAC7@chr12@-@47785387^47784217-@47785386^47785388-47784217^47784219-	sex-biased (female)	4
RI@HIRIP3@chr16@-@29995343^29995217-@29995342^29995344-29995217^29995219-	sex-biased (female)	4
RI@HNRNPH1@chr5@-@179621242^179621035-@179621241^179621243-179621035^179621037-	sex-biased (female)	4
RI@IL31RA@chr5@+@55906288^55907359-@55906287^55906289-55907359^55907361-	sex-biased (female)	4
RI@KDM3A@chr2@+@86478735^86480167-@86478734^86478736-86480167^86480169-	sex-biased (female)	4
RI@KRT8@chr12@-@52901159^52900683-@52901158^52901160-52900683^52900685-	sex-biased (female)	4
RI@KRT8@chr12@-@52901864^52901219-@52901863^52901865-52901219^52901221-	sex-biased (female)	4
RI@LDLRAP1@chr1@+@25563791^25565173-@25563790^25563792-25565173^25565175-	sex-biased (female)	4
RI@LEMD2@chr6@-@33780100^33778387-@33780099^33780101-33778387^33778389-	sex-biased (female)	4
RI@LFNG@chr7@+@2525318^2525414-@2525317^2525319-2525414^2525416-	sex-biased (female)	4
RI@LGI4@chr19@-@35134033^35133764-@35134032^35134034-35133764^35133766-	sex-biased (female)	4
RI@LILRB5@chr19@-@54254018^54252987-@54254017^54254019-54252987^54252989-	sex-biased (female)	4
RI@LPCAT4@chr15@-@34360111^34359745-@34360110^34360112-34359745^34359747-	sex-biased (female)	4
RI@MAP4K2@chr11@-@64792364^64792275-@64792363^64792365-64792275^64792277-	sex-biased (female)	4
RI@MCRS1@chr12@-@49566722^49566215-@49566721^49566723-49566215^49566217-	sex-biased (female)	4
RI@MED23@chr6@-@131593006^131592460-@131593005^131593007-131592460^131592462-	sex-biased (female)	4
RI@MED25@chr19@+@49836406^49836847-@49836405^49836407-49836847^49836849-	sex-biased (female)	4
RI@METTL17@chr14@+@20994901^20995165-@20994900^20994902-20995165^20995167-	sex-biased (female)	4
RI@MFSD8@chr4@-@127921860^127921771-@127921859^127921861-127921771^127921773-	sex-biased (female)	4
RI@MOSPD3@chr7@+@100612996^100613194-@100612995^100612997-100613194^100613196-	sex-biased (female)	4
RI@MPP2@chr17@-@43883203^43883052-@43883202^43883204-43883052^43883054-	sex-biased (female)	4
RI@MRNIP@chr5@-@179840872^179837885-@179840871^179840873-179837885^179837887-	sex-biased (female)	4
RI@MTUS1@chr8@-@17654561^17653498-@17654560^17654562-17653498^17653500-	sex-biased (female)	4
RI@MUS81@chr11@+@65864815^65865017-@65864814^65864816-65865017^65865019-	sex-biased (female)	4
RI@NAALAD2@chr11@+@90158238^90159239-@90158237^90158239-90159239^90159241-	sex-biased (female)	4
RI@NDRG4@chr16@+@58503903^58504154-@58503902^58503904-58504154^58504156-	sex-biased (female)	4
RI@NDRG4@chr16@+@58509009^58509154-@58509008^58509010-58509154^58509156-	sex-biased (female)	4
RI@NDUFS3@chr11@+@47579334^47580525-@47579333^47579335-47580525^47580527-	sex-biased (female)	4
RI@NDUFS3@chr11@+@47580622^47580835-@47580621^47580623-47580835^47580837-	sex-biased (female)	4
RI@NDUFS3@chr11@+@47580984^47582088-@47580983^47580985-47582088^47582090-	sex-biased (female)	4
RI@NDUFS3@chr11@+@47582213^47582349-@47582212^47582214-47582349^47582351-	sex-biased (female)	4
RI@NELFCD@chr20@+@58993675^58994110-@58993674^58993676-58994110^58994112-	sex-biased (female)	4
RI@NELFE@chr6@-@31956941^31956838-@31956940^31956942-31956838^31956840-	sex-biased (female)	4
RI@NGDN@chr14@+@23477356^23477503-@23477355^23477357-23477503^23477505-	sex-biased (female)	4
RI@NMRK1@chr9@-@75069895^75069102-@75069894^75069896-75069102^75069104-	sex-biased (female)	4
RI@NOL11@chr17@+@67738355^67738932-@67738354^67738356-67738932^67738934-	sex-biased (female)	4
RI@NR1H3@chr11@+@47261726^47261919-@47261725^47261727-47261919^47261921-	sex-biased (female)	4
RI@PARP1@chr1@-@226386326^226385680-@226386325^226386327-226385680^226385682-	sex-biased (female)	4
RI@PDE4A@chr19@+@10461680^10461877-@10461679^10461681-10461877^10461879-	sex-biased (female)	4
RI@PIGA@chrX@-@15325020^15324871-@15325019^15325021-15324871^15324873-	sex-biased (female)	4
RI@POLR1C@chr6@+@43519838^43520066-@43519837^43519839-43520066^43520068-	sex-biased (female)	4
RI@PPP5C@chr19@+@46387453^46388408-@46387452^46387454-46388408^46388410-	sex-biased (female)	4
RI@PPT1@chr1@-@40092398^40092172-@40092397^40092399-40092172^40092174-	sex-biased (female)	4
RI@PRPF39@chr14@+@45096228^45096887-@45096227^45096229-45096887^45096889-	sex-biased (female)	4
RI@PTPRF@chr1@+@43620221^43620454-@43620220^43620222-43620454^43620456-	sex-biased (female)	4
RI@QRICH1@chr3@-@49033120^49032773-@49033119^49033121-49032773^49032775-	sex-biased (female)	4
RI@RIOK3@chr18@+@23477086^23477179-@23477085^23477087-23477179^23477181-	sex-biased (female)	4
RI@ROBO3@chr11@+@124878796^124879190-@124878795^124878797-124879190^124879192-	sex-biased (female)	4
RI@RPP30@chr10@+@90894891^90895454-@90894890^90894892-90895454^90895456-	sex-biased (female)	4
RI@RPS24@chr10@+@78037441^78040204-@78037440^78037442-78040204^78040206-	sex-biased (female)	4
RI@SAMHD1@chr20@-@36912461^36911333-@36912460^36912462-36911333^36911335-	sex-biased (female)	4
RI@SDC3@chr1@-@30878623^30877165-@30878622^30878624-30877165^30877167-	sex-biased (female)	4
RI@SELENBP1@chr1@-@151369713^151369554-@151369712^151369714-151369554^151369556-	sex-biased (female)	4
RI@SEMA3B@chr3@+@50273646^50273759-@50273645^50273647-50273759^50273761-	sex-biased (female)	4
RI@SH3BP2@chr4@+@2833049^2833697-@2833048^2833050-2833697^2833699-	sex-biased (female)	4
RI@SIPA1L1@chr14@+@71704783^71705222-@71704782^71704784-71705222^71705224-	sex-biased (female)	4
RI@SIRT7@chr17@-@81914087^81913880-@81914086^81914088-81913880^81913882-	sex-biased (female)	4
RI@SMTN@chr22@+@31097060^31097269-@31097059^31097061-31097269^31097271-	sex-biased (female)	4
RI@SMTN@chr22@+@31099179^31099745-@31099178^31099180-31099745^31099747-	sex-biased (female)	4
RI@SNRPA1@chr15@-@101286908^101285801-@101286907^101286909-101285801^101285803-	sex-biased (female)	4
RI@SPACA6@chr19@+@51704186^51704270-@51704185^51704187-51704270^51704272-	sex-biased (female)	4
RI@SPATA20@chr17@+@50550115^50550208-@50550114^50550116-50550208^50550210-	sex-biased (female)	4
RI@SRRM2@chr16@+@2757579^2757781-@2757578^2757580-2757781^2757783-	sex-biased (female)	4
RI@STMN1@chr1@-@25903641^25901682-@25903640^25903642-25901682^25901684-	sex-biased (female)	4
RI@SULF2@chr20@-@47659697^47659452-@47659696^47659698-47659452^47659454-	sex-biased (female)	4
RI@SYVN1@chr11@-@65132732^65132351-@65132731^65132733-65132351^65132353-	sex-biased (female)	4
RI@TAF9B@chrX@-@78137962^78137883-@78137961^78137963-78137883^78137885-	sex-biased (female)	4
RI@TBK1@chr12@+@64495604^64495699-@64495603^64495605-64495699^64495701-	sex-biased (female)	4
RI@TECR@chr19@+@14563702^14563835-@14563701^14563703-14563835^14563837-	sex-biased (female)	4
RI@TECR@chr19@+@14564992^14565066-@14564991^14564993-14565066^14565068-	sex-biased (female)	4
RI@TECR@chr19@+@14565123^14565202-@14565122^14565124-14565202^14565204-	sex-biased (female)	4
RI@TMEM208@chr16@+@67228881^67228976-@67228880^67228882-67228976^67228978-	sex-biased (female)	4
RI@TMEM98@chr17@+@32931402^32931475-@32931401^32931403-32931475^32931477-	sex-biased (female)	4
RI@TNFAIP2@chr14@+@103129854^103130002-@103129853^103129855-103130002^103130004-	sex-biased (female)	4
RI@TP53@chr17@-@7676521^7676403-@7676520^7676522-7676403^7676405-	sex-biased (female)	4
RI@TPSAB1@chr16@+@1241699^1241827-@1241698^1241700-1241827^1241829-	sex-biased (female)	4
RI@TRPC4@chr13@-@37639258^37639129-@37639257^37639259-37639129^37639131-	sex-biased (female)	4
RI@TSPAN17@chr5@+@176652913^176654895-@176652912^176652914-176654895^176654897-	sex-biased (female)	4
RI@TXNRD2@chr22@-@19877040^19875807-@19877039^19877041-19875807^19875809-	sex-biased (female)	4
RI@VILL@chr3@+@38006252^38006449-@38006251^38006253-38006449^38006451-	sex-biased (female)	4
RI@WDTC1@chr1@+@27303795^27305001-@27303794^27303796-27305001^27305003-	sex-biased (female)	4
RI@ZDHHC4@chr7@+@6577498^6577590-@6577497^6577499-6577590^6577592-	sex-biased (female)	4
RI@ZSCAN25@chr7@+@99619993^99621373-@99619992^99619994-99621373^99621375-	sex-biased (female)	4
SE@ABI3BP@chr3@-@100832264^100808235-@100832264^100824941-100824858^100823514-100823458^100822672-100822589^100821113-100821054^100808235-	sex-biased (female)	4
SE@ABI3BP@chr3@-@100832264^100808235-@100832264^100829664-100829581^100825844-100825785^100824941-100824858^100823514-100823458^100822672-100822589^100808235-	sex-biased (female)	4
SE@ABI3BP@chr3@-@100832264^100808235-@100832264^100829664-100829581^100828452-100828393^100825844-100825785^100824941-100824858^100808235-	sex-biased (female)	4
SE@ABI3BP@chr3@-@100832264^100808235-@100832264^100830634-100830578^100828452-100828393^100825844-100825785^100824941-100824858^100823514-100823458^100822672-100822589^100821113-100821054^100820303-100820220^100818581-100818525^100817495-100817436^100816768-100816688^100815971-100815912^100813735-100813661^100812523-100812467^100811799-100811728^100811277-100811230^100810477-100810412^100808235-	sex-biased (female)	4
SE@ABI3BP@chr3@-@100832264^100808235-@100832264^100830634-100830578^100829664-100829581^100828452-100828393^100825844-100825785^100824941-100824858^100823514-100823458^100822672-100822589^100821113-100821054^100820303-100820220^100818581-100818525^100817495-100817436^100816768-100816688^100815971-100815912^100813735-100813661^100812523-100812467^100811799-100811728^100811277-100811230^100810477-1…	sex-biased (female)	4
SE@ABI3BP@chr3@-@100846372^100808235-@100846372^100834773-100834684^100833157-100833125^100832350-100832264^100808235-	sex-biased (female)	4
SE@ABI3BP@chr3@-@100846372^100808235-@100846372^100842039-100841998^100840858-100840820^100839616-100839569^100838464-100838402^100838284-100838210^100837171-100837124^100835660-100835601^100834773-100834684^100833157-100833125^100832350-100832264^100830634-100830578^100828452-100828393^100825844-100825785^100824941-100824858^100823514-100823458^100822672-100822589^100821113-100821054^100820303-1…	sex-biased (female)	4
SE@ABI3BP@chr3@-@100846372^100808235-@100846372^100842039-100841998^100840858-100840820^100840164-100840072^100839616-100839569^100837171-100837124^100835660-100835601^100834773-100834684^100833157-100833125^100832350-100832264^100808235-	sex-biased (female)	4
SE@ABI3BP@chr3@-@100846372^100808235-@100846372^100842039-100841998^100840858-100840820^100840164-100840072^100839616-100839569^100838464-100838402^100838284-100838210^100837171-100837124^100835660-100835601^100834773-100834684^100833157-100833125^100832350-100832264^100830634-100830578^100829664-100829581^100828452-100828393^100825844-100825785^100824941-100824858^100823514-100823458^100822672-1…	sex-biased (female)	4
SE@ABI3BP@chr3@-@100864002^100862385-@100864002^100862909-100862838^100862385-	sex-biased (female)	4
SE@AC004997.1@chr22@-@30293651^30287560-@30293651^30288776-30288706^30287560-	sex-biased (female)	4
SE@ACOX3@chr4@-@8374978^8370994-@8374978^8373628-8373561^8370994-	sex-biased (female)	4
SE@ACTN2@chr1@+@236726020^236731233-@236726020^236727678-236727756^236731233-	sex-biased (female)	4
SE@ADGRE5@chr19@+@14391079^14397658-@14391079^14396342-14396473^14397077-14397223^14397658-	sex-biased (female)	4
SE@ADGRE5@chr19@+@14391079^14397658-@14391079^14396342-14396473^14397658-	sex-biased (female)	4
SE@AFMID@chr17@+@78202751^78205440-@78202751^78204656-78204741^78204828-78204900^78205093-78205190^78205440-	sex-biased (female)	4
SE@AFMID@chr17@+@78202751^78205946-@78202751^78205440-78205518^78205946-	sex-biased (female)	4
SE@AGK@chr7@+@141555567^141596562-@141555567^141562107-141562110^141593146-141593185^141596562-	sex-biased (female)	4
SE@AGK@chr7@+@141555567^141596562-@141555567^141593146-141593185^141594675-141594928^141596562-	sex-biased (female)	4
SE@ANKS3@chr16@-@4724750^4714186-@4724750^4717547-4717443^4714186-	sex-biased (female)	4
SE@AOPEP@chr9@+@95080780^95086682-@95080780^95082575-95082719^95086682-	sex-biased (female)	4
SE@AREL1@chr14@-@74685600^74683533-@74685600^74684680-74684454^74683533-	sex-biased (female)	4
[truncated: 20,214 more rows]
