# Supplementary material for: Pan-tissue transcriptome analysis reveals sex-dimorphic human aging
Source: eLife. 2025 Oct 3;13:RP102449. doi: 10.7554/eLife.102449 (PMC12494380; doi:10.7554/eLife.102449)
Supplement: Supplementary file 4. [file elife-102449-supp4.xlsx]

## Sheet: MSigDB_c5
Table S4. GO analysis of sBASEs across multiple tissues
	Adipose-Subcutaneous_female	Adipose-Subcutaneous_male	Adipose-Visceral(Omentum)_female	Adipose-Visceral(Omentum)_male	AdrenalGland_female	AdrenalGland_male	Artery-Aorta_female	Artery-Aorta_male	Artery-Coronary_female	Artery-Coronary_male	Artery-Tibial_female	Artery-Tibial_male	Brain_DECISION_female	Brain_DECISION_male	Brain_HORMONE_female	Brain_HORMONE_male	Brain_MEMORY_female	Brain_MEMORY_male	Brain_MOVEMENT_female	Brain_MOVEMENT_male	Breast-MammaryTissue_female	Breast-MammaryTissue_male	Cells-Culturedfibroblasts_female	Cells-Culturedfibroblasts_male	Cells-EBV-transformedlymphocytes_female	Cells-EBV-transformedlymphocytes_male	Colon-Sigmoid_female	Colon-Sigmoid_male	Colon-Transverse_female	Colon-Transverse_male	Esophagus-GastroesophagealJunction_female	Esophagus-GastroesophagealJunction_male	Esophagus-Mucosa_female	Esophagus-Mucosa_male	Esophagus-Muscularis_female	Esophagus-Muscularis_male	Heart-AtrialAppendage_female	Heart-AtrialAppendage_male	Heart-LeftVentricle_female	Heart-LeftVentricle_male	Kidney-Cortex_female	Kidney-Cortex_male	Liver_female	Liver_male	Lung_female	Lung_male	MinorSalivaryGland_female	MinorSalivaryGland_male	Muscle-Skeletal_female
GO_1_ACYL_2_LYSOPHOSPHATIDYLSERINE_ACYLHYDROLASE_ACTIVITY	NA	NA	NA	NA	NA	NA	NA	NA	NA	NA	NA	NA	NA	NA	NA	NA	NA	NA	NA	NA	NA	NA	NA	NA	NA	NA	NA	NA	NA	NA	NA	NA	NA	NA	NA	NA	NA	NA	NA	NA	NA	NA	NA	NA	NA	NA	NA	NA	NA
GO_1_ACYLGLYCEROL_3_PHOSPHATE_O_ACYLTRANSFERASE_ACTIVITY	NA	NA	NA	NA	NA	NA	NA	NA	NA	NA	NA	NA	NA	NA	NA	NA	0.00148148	NA	0.0322421	0.26239	NA	NA	NA	NA	NA	NA	0.158518	0.00863551	NA	NA	NA	NA	NA	NA	NA	NA	NA	NA	NA	NA	NA	NA	NA	NA	NA	NA	NA	NA	NA
GO_1_PHOSPHATIDYLINOSITOL_BINDING	NA	NA	NA	NA	NA	NA	NA	NA	NA	NA	NA	NA	NA	NA	NA	NA	NA	NA	NA	NA	NA	NA	NA	NA	NA	NA	NA	NA	NA	NA	NA	NA	NA	NA	NA	NA	NA	NA	NA	NA	NA	NA	0.0115834	0.140628	NA	NA	NA	NA	NA
GO_14_3_3_PROTEIN_BINDING	NA	NA	NA	NA	NA	NA	NA	NA	NA	NA	NA	NA	NA	NA	NA	NA	NA	NA	NA	NA	NA	NA	NA	NA	NA	NA	NA	NA	NA	NA	NA	NA	NA	NA	NA	NA	0.256475	0.00303338	NA	NA	NA	NA	NA	NA	NA	NA	NA	NA	NA
GO_2_OXOGLUTARATE_DEPENDENT_DIOXYGENASE_ACTIVITY	NA	NA	NA	NA	NA	NA	NA	NA	NA	NA	NA	NA	NA	NA	NA	NA	NA	NA	NA	NA	NA	NA	NA	NA	NA	NA	NA	NA	NA	NA	NA	NA	NA	NA	NA	NA	NA	NA	NA	NA	NA	NA	0.0171474	0.392484	NA	NA	NA	NA	NA
GO_3_5_CYCLIC_AMP_PHOSPHODIESTERASE_ACTIVITY	NA	NA	NA	NA	NA	NA	0.0153172	0.169651	NA	NA	NA	NA	0.0353922	NA	0.0164558	0.126763	NA	NA	NA	NA	NA	NA	NA	NA	NA	NA	NA	NA	NA	NA	NA	NA	NA	NA	NA	NA	NA	NA	NA	NA	NA	NA	NA	NA	NA	NA	NA	NA	NA
GO_3_5_CYCLIC_GMP_PHOSPHODIESTERASE_ACTIVITY	NA	NA	NA	NA	NA	NA	NA	NA	NA	0.0128885	NA	NA	0.0353922	NA	0.0164558	0.126763	NA	NA	NA	NA	NA	NA	NA	NA	NA	NA	NA	NA	NA	NA	NA	NA	NA	NA	NA	NA	NA	NA	NA	NA	NA	NA	NA	NA	NA	NA	NA	NA	NA
GO_3_5_DNA_HELICASE_ACTIVITY	NA	NA	NA	NA	NA	NA	NA	NA	NA	NA	NA	NA	NA	NA	NA	NA	NA	NA	NA	NA	NA	NA	NA	NA	NA	NA	NA	NA	NA	NA	NA	NA	NA	NA	NA	NA	NA	NA	NA	NA	NA	0.0330579	NA	NA	NA	NA	0.0412855	NA	NA
GO_3_5_EXODEOXYRIBONUCLEASE_ACTIVITY	NA	NA	NA	0.00810037	NA	NA	NA	NA	NA	NA	NA	NA	NA	NA	NA	NA	NA	NA	NA	NA	NA	NA	NA	NA	NA	NA	NA	NA	NA	NA	NA	NA	NA	NA	NA	NA	NA	NA	NA	NA	NA	NA	NA	NA	NA	NA	NA	NA	NA
GO_3_5_EXONUCLEASE_ACTIVITY	NA	NA	NA	NA	NA	NA	NA	NA	NA	NA	NA	NA	NA	NA	NA	NA	NA	NA	NA	NA	NA	NA	NA	NA	NA	NA	0.0262397	0.0986069	NA	NA	0.0277889	NA	NA	NA	NA	NA	NA	NA	NA	NA	NA	NA	NA	NA	NA	NA	NA	NA	NA
GO_3_UTR_MEDIATED_MRNA_DESTABILIZATION	NA	NA	NA	NA	NA	NA	NA	NA	NA	0.0253089	NA	NA	NA	NA	NA	NA	NA	NA	NA	NA	NA	NA	NA	NA	NA	NA	NA	NA	NA	NA	NA	NA	NA	NA	NA	NA	NA	NA	NA	NA	NA	NA	NA	NA	NA	NA	NA	NA	NA
GO_3_UTR_MEDIATED_MRNA_STABILIZATION	NA	NA	NA	NA	NA	NA	NA	NA	NA	NA	NA	NA	NA	NA	NA	NA	0.00525964	NA	0.00914309	NA	NA	NA	NA	NA	NA	NA	NA	NA	NA	NA	NA	NA	NA	NA	NA	NA	NA	NA	NA	NA	NA	NA	NA	NA	NA	NA	NA	NA	NA
GO_4_IRON_4_SULFUR_CLUSTER_BINDING	NA	NA	NA	NA	NA	NA	NA	NA	NA	NA	NA	NA	NA	NA	NA	NA	NA	NA	0.00116188	0.573761	NA	NA	NA	NA	0.0461515	0.319326	NA	NA	NA	NA	NA	NA	NA	NA	NA	NA	NA	NA	NA	NA	NA	NA	NA	NA	NA	NA	NA	NA	NA
GO_5_3_EXONUCLEASE_ACTIVITY	NA	NA	NA	NA	0.205138	0.0298159	NA	NA	0.0440308	0.245295	0.01844	NA	NA	NA	NA	NA	NA	NA	0.049965	NA	NA	NA	NA	NA	NA	NA	NA	NA	NA	NA	NA	NA	NA	NA	NA	NA	NA	0.0127389	NA	NA	NA	NA	NA	NA	NA	NA	NA	NA	NA
GO_90S_PRERIBOSOME	NA	NA	NA	NA	NA	NA	NA	NA	NA	NA	NA	NA	NA	NA	NA	NA	NA	NA	NA	NA	NA	NA	NA	NA	NA	NA	NA	NA	NA	NA	NA	NA	NA	NA	NA	NA	NA	NA	NA	NA	NA	NA	NA	NA	NA	NA	NA	NA	NA
GO_9PLUS0_NON_MOTILE_CILIUM	NA	NA	NA	NA	NA	NA	NA	NA	NA	NA	NA	NA	NA	NA	NA	NA	NA	NA	NA	NA	NA	NA	NA	NA	NA	NA	NA	NA	NA	NA	NA	NA	NA	NA	NA	NA	0.0389075	0.718351	NA	NA	NA	NA	NA	NA	NA	NA	NA	NA	NA
GO_9PLUS2_MOTILE_CILIUM	NA	NA	NA	NA	NA	0.0293811	NA	NA	NA	NA	NA	NA	NA	NA	NA	NA	NA	NA	NA	NA	NA	NA	NA	NA	NA	NA	NA	NA	NA	NA	NA	NA	NA	NA	NA	NA	NA	NA	NA	NA	NA	NA	NA	NA	NA	NA	NA	NA	NA
GO_A_BAND	NA	NA	NA	NA	NA	NA	NA	NA	NA	NA	NA	NA	NA	NA	NA	NA	NA	NA	NA	NA	NA	NA	NA	NA	NA	NA	NA	NA	NA	NA	NA	NA	NA	NA	0.313122	0.0414632	0.00474347	0.287399	NA	NA	NA	NA	NA	NA	NA	NA	0.025184	0.108614	NA
GO_ACETYLGLUCOSAMINYLTRANSFERASE_ACTIVITY	NA	NA	NA	NA	NA	NA	0.0487977	0.546573	NA	NA	NA	NA	NA	NA	NA	NA	NA	NA	NA	NA	NA	NA	NA	NA	NA	NA	NA	NA	NA	NA	NA	NA	NA	NA	NA	NA	NA	NA	NA	NA	NA	NA	NA	NA	NA	NA	NA	NA	NA
GO_ACETYLTRANSFERASE_ACTIVITY	NA	NA	0.044143	NA	NA	NA	NA	NA	0.0392534	0.458292	NA	NA	NA	NA	NA	NA	NA	NA	NA	NA	NA	NA	NA	NA	NA	NA	NA	NA	NA	NA	NA	NA	NA	NA	NA	NA	NA	NA	NA	NA	NA	NA	NA	NA	NA	NA	NA	NA	NA
GO_ACID_AMINO_ACID_LIGASE_ACTIVITY	NA	NA	NA	NA	NA	NA	NA	NA	NA	NA	NA	NA	NA	NA	NA	NA	NA	NA	NA	NA	NA	NA	NA	NA	NA	NA	NA	NA	NA	NA	NA	NA	NA	NA	NA	NA	NA	0.0154594	NA	NA	NA	NA	NA	NA	NA	NA	NA	NA	NA
GO_ACID_THIOL_LIGASE_ACTIVITY	NA	NA	NA	NA	NA	NA	NA	NA	NA	NA	NA	NA	NA	NA	NA	NA	NA	NA	NA	NA	NA	NA	NA	NA	NA	NA	NA	NA	NA	NA	NA	NA	NA	NA	0.0366233	NA	NA	NA	NA	NA	NA	NA	0.0489417	NA	0.0489417	NA	NA	NA	NA
GO_ACIDIC_AMINO_ACID_TRANSPORT	NA	NA	NA	NA	NA	NA	NA	NA	NA	NA	NA	NA	NA	NA	NA	NA	0.672614	0.0388193	NA	NA	NA	NA	NA	NA	NA	NA	NA	NA	NA	NA	NA	NA	NA	NA	NA	NA	NA	NA	NA	NA	NA	NA	NA	NA	NA	NA	NA	NA	NA
GO_ACROSOMAL_MEMBRANE	NA	NA	NA	NA	NA	NA	NA	NA	NA	NA	NA	NA	NA	NA	NA	NA	NA	NA	NA	NA	NA	NA	NA	NA	NA	NA	NA	NA	NA	0.0254813	NA	NA	NA	NA	NA	NA	NA	0.0232264	NA	NA	NA	NA	NA	NA	NA	NA	NA	NA	NA
GO_ACROSOMAL_VESICLE	NA	NA	NA	NA	NA	NA	NA	NA	NA	NA	NA	NA	NA	NA	NA	NA	NA	NA	NA	NA	NA	NA	NA	NA	NA	NA	NA	NA	NA	NA	NA	NA	NA	NA	NA	NA	NA	NA	NA	NA	NA	NA	NA	NA	NA	NA	NA	NA	NA
GO_ACROSOME_REACTION	NA	NA	NA	NA	NA	NA	NA	NA	NA	NA	NA	NA	NA	NA	NA	NA	NA	NA	NA	NA	NA	NA	NA	NA	NA	NA	NA	NA	NA	NA	NA	NA	NA	NA	NA	NA	NA	NA	0.0148176	0.189949	NA	NA	NA	NA	NA	NA	NA	NA	NA
GO_ACTIN_BASED_CELL_PROJECTION	NA	NA	0.00699823	NA	NA	NA	NA	NA	NA	NA	NA	NA	0.653705	0.00250294	NA	NA	0.448705	0.0456671	0.0255049	0.453334	NA	NA	NA	NA	NA	NA	NA	NA	NA	NA	NA	NA	NA	NA	NA	0.0443071	NA	NA	NA	NA	NA	NA	NA	NA	NA	NA	NA	NA	NA
GO_ACTIN_BINDING	NA	NA	0.0514758	0.00988157	NA	NA	NA	NA	0.0908096	0.0287463	NA	NA	0.0881228	0.00916912	0.0644171	0.0262772	NA	NA	0.213445	0.00142725	0.00412971	0.175859	NA	NA	NA	NA	NA	NA	NA	NA	0.581982	0.0126701	NA	NA	0.646256	0.0386426	0.109948	0.047134	NA	NA	NA	NA	NA	NA	0.415828	0.0334067	0.00870075	0.902331	0.420992
GO_ACTIN_CROSSLINK_FORMATION	NA	NA	NA	NA	NA	NA	NA	NA	NA	NA	NA	NA	NA	NA	NA	NA	NA	NA	NA	NA	NA	NA	NA	NA	0.0248056	NA	NA	NA	NA	NA	NA	NA	NA	NA	NA	NA	NA	NA	NA	NA	NA	NA	NA	NA	NA	NA	NA	NA	NA
GO_ACTIN_CYTOSKELETON_REORGANIZATION	NA	NA	NA	NA	NA	NA	NA	NA	NA	NA	0.690378	0.0164946	NA	NA	NA	NA	NA	NA	NA	NA	NA	NA	NA	NA	NA	NA	NA	NA	NA	0.0183851	NA	NA	NA	NA	NA	NA	NA	NA	NA	NA	NA	NA	NA	NA	NA	NA	NA	NA	NA
GO_ACTIN_DEPENDENT_ATPASE_ACTIVITY	NA	NA	0.262979	0.036513	NA	NA	NA	NA	NA	NA	NA	NA	NA	NA	NA	NA	NA	NA	NA	NA	NA	NA	NA	NA	NA	NA	NA	NA	NA	NA	NA	NA	NA	NA	NA	NA	NA	NA	NA	NA	NA	NA	NA	NA	NA	NA	NA	NA	NA
GO_ACTIN_FILAMENT	NA	NA	NA	NA	NA	NA	0.0116787	0.539163	NA	NA	0.0412092	0.0949194	NA	NA	0.584853	0.043	0.546411	8.49684e-06	0.385535	0.0307246	0.0066001	NA	NA	NA	NA	NA	NA	NA	0.12335	0.00538205	NA	NA	NA	0.0298872	NA	NA	NA	NA	NA	NA	NA	NA	NA	NA	NA	NA	NA	NA	NA
GO_ACTIN_FILAMENT_BASED_MOVEMENT	NA	NA	NA	NA	NA	NA	NA	NA	NA	NA	NA	NA	0.342486	0.0103891	0.0438282	0.246807	NA	NA	NA	NA	NA	NA	NA	NA	NA	NA	NA	NA	NA	NA	NA	NA	NA	NA	NA	NA	0.0137414	0.754724	NA	NA	NA	NA	NA	NA	NA	NA	0.0164683	0.905096	NA
GO_ACTIN_FILAMENT_BASED_TRANSPORT	NA	NA	NA	NA	NA	NA	NA	NA	NA	NA	NA	NA	NA	NA	NA	NA	NA	NA	NA	NA	NA	NA	NA	NA	NA	NA	NA	NA	NA	NA	NA	NA	NA	NA	NA	NA	NA	NA	NA	NA	NA	NA	NA	NA	NA	NA	NA	NA	NA
GO_ACTIN_FILAMENT_BINDING	NA	NA	NA	NA	NA	NA	NA	NA	NA	NA	NA	NA	0.0156669	0.220944	0.0583932	0.00880516	0.219023	0.000364194	NA	NA	0.0283868	0.164348	NA	NA	NA	NA	NA	NA	0.12009	0.0483645	0.912518	0.0175436	NA	NA	0.344806	0.0349726	0.0421813	0.56192	0.0169151	0.304431	NA	NA	NA	NA	NA	NA	0.0259527	0.823763	NA
GO_ACTIN_FILAMENT_BUNDLE	0.470863	0.00834889	NA	NA	NA	NA	0.00131348	0.108672	0.148397	0.00494269	0.0096325	0.503057	NA	NA	0.357565	0.0101002	NA	NA	0.171715	0.0174403	0.00431697	0.0919536	NA	NA	NA	NA	0.0546982	0.0343262	NA	NA	NA	NA	0.175148	0.0392212	NA	NA	0.501102	0.0311025	NA	NA	NA	NA	NA	NA	NA	0.0180136	0.00180179	0.106246	NA
GO_ACTIN_FILAMENT_BUNDLE_ORGANIZATION	NA	NA	NA	NA	NA	NA	0.0450874	0.447024	NA	NA	NA	NA	0.0500271	0.00373493	NA	NA	0.10535	3.31999e-05	NA	NA	NA	NA	NA	NA	NA	NA	NA	NA	0.0468503	0.198067	NA	NA	NA	NA	NA	NA	NA	NA	NA	NA	NA	NA	NA	NA	NA	0.0206471	NA	NA	NA
GO_ACTIN_FILAMENT_DEPOLYMERIZATION	NA	NA	NA	NA	NA	NA	0.00238504	NA	NA	NA	0.476291	0.0166137	0.0152603	0.599447	NA	NA	NA	0.0202735	NA	NA	NA	NA	NA	NA	NA	NA	NA	NA	NA	NA	NA	NA	NA	NA	NA	NA	NA	NA	NA	NA	NA	NA	NA	NA	NA	NA	NA	NA	0.0712271
GO_ACTIN_FILAMENT_NETWORK_FORMATION	NA	NA	NA	NA	NA	NA	NA	NA	NA	NA	NA	NA	0.00295313	0.172267	NA	NA	NA	0.00111943	NA	NA	NA	NA	NA	NA	NA	NA	NA	NA	NA	NA	NA	NA	NA	NA	NA	NA	NA	NA	NA	NA	NA	NA	NA	NA	NA	NA	NA	NA	NA
GO_ACTIN_FILAMENT_ORGANIZATION	NA	NA	0.0489473	0.183117	NA	NA	0.0237182	0.499594	0.0232215	0.305605	0.205602	0.0198086	0.0829094	0.000498773	0.00269295	0.0562947	0.235165	3.26834e-07	0.0041014	0.163814	0.046447	0.565285	NA	NA	NA	NA	NA	NA	0.0968901	0.00904372	NA	NA	0.935034	0.00141326	NA	NA	NA	NA	0.0173202	0.0845156	NA	NA	NA	NA	NA	NA	0.03656	0.791235	0.414202
GO_ACTIN_FILAMENT_REORGANIZATION	NA	NA	NA	NA	NA	NA	NA	NA	NA	NA	NA	NA	0.0249441	0.145762	NA	NA	NA	NA	NA	NA	0.00842041	NA	NA	NA	NA	NA	NA	NA	NA	NA	NA	NA	NA	NA	0.00432201	NA	NA	NA	0.000984087	NA	NA	NA	NA	NA	NA	NA	NA	NA	NA
GO_ACTIN_FILAMENT_SEVERING	NA	NA	NA	NA	NA	NA	0.00197875	NA	NA	NA	0.0132246	0.138388	NA	NA	NA	NA	0.222188	0.0326791	0.0363924	0.277211	NA	NA	NA	NA	NA	NA	NA	NA	NA	NA	NA	NA	NA	NA	NA	NA	NA	NA	NA	NA	NA	NA	NA	NA	NA	NA	NA	NA	NA
GO_ACTIN_MEDIATED_CELL_CONTRACTION	NA	NA	NA	NA	NA	NA	NA	NA	NA	NA	0.746916	0.0275984	0.375413	0.0128486	NA	NA	NA	NA	NA	NA	NA	NA	NA	NA	NA	NA	NA	NA	NA	NA	NA	NA	NA	NA	NA	NA	0.0056501	NA	NA	NA	NA	NA	NA	NA	NA	NA	0.0193147	0.849179	NA
GO_ACTIN_NUCLEATION	NA	NA	NA	0.0293225	NA	NA	NA	NA	NA	NA	NA	NA	0.387396	0.00938901	NA	NA	NA	NA	NA	NA	NA	NA	NA	NA	NA	NA	NA	NA	NA	NA	NA	NA	NA	NA	NA	NA	NA	NA	NA	NA	NA	NA	NA	NA	NA	NA	NA	NA	NA
GO_ACTIN_POLYMERIZATION_OR_DEPOLYMERIZATION	NA	NA	NA	NA	NA	NA	0.0270665	0.442026	NA	NA	0.229872	0.0010808	0.0540398	0.00258629	0.0328101	0.237215	0.262242	0.00681113	0.0261605	0.157838	NA	NA	NA	NA	NA	NA	NA	NA	0.699572	0.00133455	0.0154664	0.892582	NA	0.0238252	NA	NA	NA	NA	NA	NA	NA	NA	NA	NA	NA	NA	NA	NA	NA
GO_ACTININ_BINDING	NA	NA	NA	NA	NA	NA	0.00258264	0.105515	NA	NA	NA	NA	NA	NA	NA	NA	NA	NA	NA	NA	NA	NA	NA	NA	NA	NA	NA	NA	0.115712	0.0464278	NA	NA	NA	NA	NA	NA	NA	NA	NA	NA	NA	NA	NA	NA	NA	NA	NA	NA	NA
GO_ACTION_POTENTIAL	NA	NA	NA	NA	NA	NA	NA	NA	NA	NA	0.453153	0.0395844	NA	NA	0.0285952	0.202624	NA	NA	NA	NA	0.134409	0.0145211	NA	NA	0.0498225	0.718351	NA	NA	NA	NA	NA	NA	NA	NA	NA	NA	0.0389075	NA	NA	NA	NA	NA	NA	NA	NA	NA	NA	NA	NA
GO_ACTIVATED_T_CELL_PROLIFERATION	NA	NA	NA	NA	NA	NA	NA	NA	NA	NA	NA	NA	NA	NA	NA	NA	NA	NA	NA	NA	NA	NA	NA	NA	NA	NA	NA	NA	NA	NA	NA	NA	NA	NA	NA	NA	NA	NA	NA	NA	NA	NA	NA	NA	NA	NA	NA	NA	NA
GO_ACTIVATING_TRANSCRIPTION_FACTOR_BINDING	NA	NA	NA	NA	0.00276498	0.318512	NA	NA	0.00298703	0.329155	NA	NA	NA	NA	NA	NA	NA	NA	NA	NA	NA	NA	NA	NA	NA	NA	NA	NA	0.0413448	NA	NA	NA	NA	NA	NA	NA	NA	NA	NA	NA	NA	NA	NA	NA	NA	NA	0.39922	0.0337306	0.0227383
GO_ACTIVATION_OF_CYSTEINE_TYPE_ENDOPEPTIDASE_ACTIVITY	NA	NA	NA	NA	NA	NA	NA	0.0216622	NA	NA	NA	NA	NA	NA	NA	NA	NA	NA	NA	NA	NA	NA	NA	NA	NA	NA	NA	NA	NA	NA	NA	NA	NA	NA	NA	NA	NA	NA	NA	NA	NA	NA	0.0132619	NA	NA	NA	NA	NA	NA
GO_ACTIVATION_OF_CYSTEINE_TYPE_ENDOPEPTIDASE_ACTIVITY_INVOLVED_IN_APOPTOTIC_PROCESS	NA	NA	0.665523	0.0235348	NA	NA	NA	NA	0.45292	0.00168064	NA	NA	NA	NA	NA	NA	NA	NA	NA	NA	0.709262	0.000297542	NA	NA	NA	NA	NA	NA	NA	NA	NA	NA	NA	NA	NA	NA	NA	NA	NA	NA	NA	NA	NA	NA	NA	NA	NA	0.0422486	NA
GO_ACTIVATION_OF_GTPASE_ACTIVITY	NA	NA	NA	NA	0.0412605	0.0698989	NA	NA	NA	NA	NA	NA	NA	NA	NA	NA	0.503463	0.00335655	NA	NA	NA	NA	NA	NA	NA	NA	NA	NA	0.526098	0.0201655	NA	NA	NA	NA	NA	NA	NA	NA	NA	NA	NA	NA	NA	NA	NA	NA	NA	NA	NA
GO_ACTIVATION_OF_INNATE_IMMUNE_RESPONSE	NA	NA	0.537419	0.00938641	NA	NA	0.669243	0.000355598	NA	NA	NA	NA	NA	NA	NA	NA	0.0715177	0.0432502	NA	NA	NA	NA	NA	NA	0.758825	0.0410337	NA	NA	NA	NA	0.81299	0.0140792	NA	NA	NA	NA	NA	NA	NA	NA	NA	NA	NA	NA	NA	NA	NA	NA	NA
GO_ACTIVATION_OF_JANUS_KINASE_ACTIVITY	NA	NA	NA	NA	NA	0.0190072	NA	NA	NA	NA	NA	NA	NA	NA	NA	NA	NA	NA	NA	NA	NA	NA	NA	NA	NA	NA	NA	NA	NA	NA	NA	NA	NA	NA	NA	NA	NA	NA	NA	NA	NA	NA	NA	NA	NA	NA	NA	NA	NA
GO_ACTIVATION_OF_JNKK_ACTIVITY	NA	NA	NA	NA	NA	NA	NA	0.000541114	NA	NA	NA	NA	NA	NA	NA	NA	NA	NA	NA	NA	NA	NA	NA	NA	NA	NA	NA	NA	NA	NA	NA	NA	NA	NA	NA	NA	NA	NA	NA	NA	NA	NA	NA	NA	NA	NA	NA	NA	NA
GO_ACTIVATION_OF_JUN_KINASE_ACTIVITY	NA	NA	NA	NA	NA	NA	0.477757	0.00323271	NA	NA	NA	NA	NA	NA	NA	NA	NA	NA	NA	NA	NA	NA	NA	NA	NA	NA	NA	NA	NA	NA	0.0113425	NA	NA	NA	NA	NA	NA	NA	NA	NA	NA	NA	NA	NA	NA	NA	NA	NA	0.0366699
GO_ACTIVATION_OF_MAPK_ACTIVITY	NA	NA	NA	NA	NA	NA	NA	NA	NA	NA	NA	NA	NA	NA	NA	NA	NA	NA	NA	NA	NA	NA	NA	NA	NA	NA	NA	NA	NA	NA	0.0365955	0.792404	NA	NA	NA	NA	NA	NA	NA	NA	NA	NA	NA	NA	NA	NA	NA	NA	0.0307472
GO_ACTIVATION_OF_MAPKK_ACTIVITY	NA	NA	NA	NA	NA	NA	NA	0.00829678	NA	NA	NA	NA	NA	NA	NA	NA	NA	NA	NA	NA	NA	NA	NA	NA	NA	NA	NA	NA	NA	NA	NA	NA	NA	NA	NA	NA	NA	NA	NA	NA	0.190235	0.00791848	NA	NA	NA	NA	NA	NA	NA
GO_ACTIVATION_OF_MAPKKK_ACTIVITY	NA	NA	NA	NA	NA	NA	NA	NA	0.0184327	0.162816	NA	NA	NA	NA	NA	NA	NA	NA	NA	NA	NA	NA	NA	NA	NA	NA	NA	NA	NA	NA	NA	NA	NA	NA	NA	NA	NA	NA	NA	NA	NA	NA	NA	NA	NA	NA	NA	NA	NA
GO_ACTIVATION_OF_NF_KAPPAB_INDUCING_KINASE_ACTIVITY	NA	NA	NA	NA	NA	NA	NA	NA	NA	NA	NA	NA	NA	NA	NA	NA	NA	NA	NA	NA	NA	NA	NA	NA	NA	NA	NA	NA	NA	NA	NA	NA	NA	NA	NA	NA	NA	NA	NA	NA	NA	NA	NA	NA	NA	NA	0.0335765	NA	NA
GO_ACTIVATION_OF_PHOSPHOLIPASE_C_ACTIVITY	NA	NA	NA	NA	NA	NA	NA	NA	NA	NA	NA	NA	NA	NA	NA	NA	NA	0.0227706	NA	NA	NA	NA	NA	NA	0.482036	0.0382439	NA	NA	NA	NA	NA	NA	NA	NA	NA	NA	NA	NA	NA	NA	NA	NA	NA	NA	NA	NA	NA	NA	NA
GO_ACTIVATION_OF_PROTEIN_KINASE_ACTIVITY	NA	NA	0.0010725	0.127062	0.0470115	0.515743	NA	NA	0.015648	0.53788	NA	NA	0.0101725	0.414781	NA	NA	0.760803	0.0375163	NA	NA	0.0206176	0.896784	NA	NA	NA	NA	NA	NA	NA	NA	0.0162399	0.645287	NA	NA	NA	NA	NA	NA	NA	NA	NA	NA	NA	NA	NA	NA	NA	NA	0.00372126
GO_ACTIVE_ION_TRANSMEMBRANE_TRANSPORTER_ACTIVITY	NA	NA	NA	NA	NA	NA	NA	NA	NA	NA	NA	NA	NA	NA	NA	NA	NA	NA	0.814589	0.0422565	NA	NA	NA	NA	0.81745	0.0186196	NA	NA	NA	NA	NA	NA	NA	NA	NA	NA	NA	NA	NA	NA	0.0256505	0.864727	NA	NA	NA	NA	NA	NA	NA
GO_ACTIVE_TRANSMEMBRANE_TRANSPORTER_ACTIVITY	NA	NA	NA	NA	NA	NA	NA	NA	NA	NA	NA	NA	NA	NA	NA	NA	NA	NA	0.961088	0.0222865	NA	NA	NA	NA	0.488707	0.0384569	NA	NA	NA	NA	NA	NA	NA	NA	NA	NA	NA	NA	NA	NA	0.0407025	0.153457	NA	NA	NA	NA	NA	NA	NA
GO_ACTOMYOSIN	0.484192	0.00929467	NA	NA	0.067503	0.00525907	NA	NA	0.0500201	0.00101215	0.00174198	0.516792	NA	NA	0.14204	0.00185138	NA	NA	0.185957	0.0203288	0.00510218	0.0982388	NA	NA	NA	NA	0.0601378	0.0378949	NA	NA	NA	NA	0.186011	0.0432518	NA	NA	0.161574	0.0343622	NA	NA	NA	NA	0.236182	0.0100055	0.60611	8.2127e-05	5.63065e-05	0.11592	NA
GO_ACTOMYOSIN_STRUCTURE_ORGANIZATION	NA	NA	0.460914	0.0409412	NA	NA	0.0425265	0.0872844	NA	NA	NA	NA	0.131165	0.00119348	NA	NA	NA	NA	NA	NA	NA	NA	NA	NA	NA	NA	NA	NA	0.00159459	0.570238	NA	NA	NA	NA	NA	NA	0.549285	0.0357519	NA	NA	NA	NA	0.420351	0.00587458	0.907868	0.00145997	NA	NA	0.444825
GO_ACUTE_INFLAMMATORY_RESPONSE	NA	NA	NA	NA	NA	NA	NA	NA	NA	NA	NA	NA	NA	NA	NA	NA	NA	NA	NA	NA	NA	NA	NA	NA	NA	NA	0.0386758	0.653255	NA	NA	NA	NA	NA	NA	NA	NA	NA	NA	NA	NA	NA	NA	NA	NA	NA	NA	NA	NA	NA
GO_ACYL_COA_BINDING	NA	NA	NA	NA	NA	NA	NA	NA	NA	NA	NA	NA	NA	NA	0.00810228	NA	NA	NA	0.0115465	0.0891295	NA	NA	NA	NA	NA	NA	NA	NA	NA	NA	NA	NA	NA	NA	NA	NA	NA	NA	NA	NA	NA	NA	NA	0.0294018	NA	NA	NA	NA	NA
GO_ACYL_COA_DEHYDROGENASE_ACTIVITY	NA	NA	NA	NA	NA	NA	NA	NA	NA	NA	NA	NA	NA	NA	0.000690961	NA	NA	NA	NA	NA	NA	NA	NA	NA	NA	NA	NA	NA	0.0131384	0.10043	0.00698597	0.104559	NA	NA	0.000157267	0.0921216	NA	NA	NA	NA	NA	NA	NA	NA	NA	NA	NA	NA	NA
GO_ACYL_COA_LIGASE_ACTIVITY	NA	NA	NA	NA	NA	NA	NA	NA	NA	NA	NA	NA	NA	NA	NA	NA	NA	NA	NA	NA	NA	NA	NA	NA	0.0367543	NA	NA	NA	NA	NA	NA	NA	NA	NA	NA	NA	NA	NA	NA	NA	0.0245089	NA	NA	NA	NA	NA	NA	NA	NA
GO_ACYLGLYCEROL_HOMEOSTASIS	NA	NA	NA	NA	NA	NA	NA	NA	NA	NA	NA	NA	NA	NA	NA	NA	NA	NA	NA	NA	NA	NA	NA	NA	NA	NA	NA	NA	NA	NA	NA	NA	NA	NA	NA	NA	NA	NA	NA	NA	0.0218478	NA	NA	NA	NA	NA	NA	NA	NA
GO_ACYLGLYCEROL_LIPASE_ACTIVITY	NA	NA	NA	NA	NA	NA	NA	NA	0.207753	0.0150854	NA	NA	NA	NA	NA	NA	NA	NA	NA	NA	NA	NA	NA	NA	NA	NA	NA	NA	NA	0.00663323	NA	NA	NA	NA	NA	NA	NA	NA	NA	NA	NA	NA	NA	NA	NA	NA	NA	NA	NA
GO_ACYLGLYCEROL_O_ACYLTRANSFERASE_ACTIVITY	NA	NA	NA	NA	NA	NA	NA	NA	NA	NA	NA	NA	NA	NA	NA	NA	0.00525964	NA	NA	NA	NA	0.0105112	NA	NA	NA	NA	0.232559	0.0198028	NA	NA	NA	NA	NA	NA	NA	NA	NA	NA	NA	NA	0.0481768	NA	NA	NA	NA	NA	NA	NA	NA
GO_ADA2_GCN5_ADA3_TRANSCRIPTION_ACTIVATOR_COMPLEX	NA	NA	NA	NA	NA	NA	NA	NA	NA	NA	NA	NA	NA	NA	NA	NA	NA	NA	NA	NA	NA	NA	NA	NA	NA	NA	NA	NA	NA	NA	NA	NA	NA	NA	NA	NA	NA	NA	NA	NA	NA	NA	NA	NA	0.16379	0.0166251	NA	NA	NA
GO_ADAPTATION_OF_SIGNALING_PATHWAY	NA	NA	NA	NA	NA	NA	NA	NA	NA	NA	NA	NA	0.429833	0.0457834	NA	NA	NA	0.000578601	NA	NA	NA	NA	NA	NA	NA	NA	NA	NA	NA	NA	NA	NA	NA	NA	0.020495	0.175802	0.0172685	NA	NA	NA	NA	NA	NA	NA	NA	NA	NA	NA	NA
GO_ADAPTIVE_IMMUNE_RESPONSE_BASED_ON_SOMATIC_RECOMBINATION_OF_IMMUNE_RECEPTORS_BUILT_FROM_IMMUNOGLOBULIN_SUPERFAMILY_DOMAINS	NA	NA	NA	NA	NA	NA	NA	NA	NA	NA	NA	NA	NA	NA	NA	NA	NA	NA	NA	NA	NA	NA	NA	NA	NA	NA	NA	NA	NA	NA	NA	NA	0.500085	0.0297786	NA	NA	NA	NA	NA	NA	NA	NA	0.98733	0.0171127	NA	NA	NA	NA	NA
GO_ADAPTIVE_THERMOGENESIS	NA	NA	NA	NA	NA	NA	0.0396444	0.216015	NA	NA	NA	NA	NA	NA	NA	NA	NA	NA	NA	NA	NA	NA	0.00808673	0.312629	0.00304613	0.759207	NA	NA	NA	NA	NA	NA	NA	NA	NA	NA	NA	NA	NA	NA	NA	NA	NA	NA	NA	NA	NA	NA	NA
GO_ADENOSINE_DEAMINASE_ACTIVITY	NA	NA	NA	NA	NA	NA	NA	NA	NA	NA	NA	NA	NA	NA	NA	NA	NA	NA	NA	NA	NA	NA	NA	NA	NA	NA	NA	NA	NA	NA	NA	NA	NA	NA	NA	0.00473703	NA	NA	NA	NA	NA	NA	NA	NA	NA	NA	NA	NA	NA
GO_ADENYL_NUCLEOTIDE_EXCHANGE_FACTOR_ACTIVITY	NA	NA	NA	NA	NA	NA	NA	NA	NA	NA	NA	NA	NA	NA	NA	NA	NA	NA	NA	NA	NA	NA	NA	NA	NA	NA	NA	NA	NA	NA	NA	NA	NA	NA	NA	NA	NA	NA	NA	NA	NA	NA	NA	NA	NA	NA	NA	NA	NA
GO_ADENYLATE_CYCLASE_ACTIVITY	NA	NA	NA	NA	NA	NA	NA	NA	NA	NA	NA	NA	NA	NA	NA	NA	NA	NA	NA	NA	NA	NA	NA	NA	NA	NA	NA	NA	NA	NA	NA	NA	NA	NA	NA	NA	NA	NA	0.0466103	NA	NA	NA	NA	NA	NA	NA	NA	NA	NA
GO_ADENYLYLTRANSFERASE_ACTIVITY	NA	NA	NA	NA	NA	NA	NA	NA	NA	NA	NA	NA	NA	NA	NA	NA	NA	NA	0.0207561	NA	NA	NA	NA	NA	NA	NA	NA	NA	NA	NA	NA	NA	NA	NA	NA	NA	NA	NA	NA	NA	NA	NA	NA	NA	NA	NA	NA	NA	NA
GO_ADHERENS_JUNCTION	NA	NA	0.00522051	0.15875	NA	NA	NA	NA	NA	NA	0.113027	0.0193098	0.059556	0.0156985	NA	NA	1.17882e-05	0.179199	NA	NA	0.0317132	0.10333	0.0439796	0.342004	NA	NA	NA	NA	0.00586273	0.0755611	0.130541	0.0257129	NA	NA	NA	NA	0.0188975	0.447631	0.187199	0.00204271	NA	NA	NA	NA	NA	NA	NA	NA	NA
GO_ADHERENS_JUNCTION_ASSEMBLY	NA	NA	NA	NA	NA	NA	NA	NA	NA	NA	NA	NA	NA	NA	NA	NA	NA	NA	NA	NA	NA	NA	NA	NA	NA	NA	NA	NA	NA	NA	NA	NA	NA	NA	NA	NA	NA	NA	NA	NA	NA	NA	NA	NA	NA	NA	0.0172348	0.168078	NA
GO_ADHERENS_JUNCTION_ORGANIZATION	NA	NA	NA	NA	NA	NA	NA	NA	NA	NA	NA	NA	NA	NA	NA	NA	0.0205368	0.339252	NA	NA	NA	NA	NA	NA	NA	NA	NA	NA	NA	NA	NA	NA	NA	NA	NA	NA	NA	NA	NA	NA	NA	NA	NA	NA	NA	NA	0.0278727	0.271391	NA
GO_ADP_BINDING	NA	NA	NA	NA	NA	NA	NA	NA	NA	NA	NA	NA	NA	NA	NA	NA	NA	NA	NA	NA	NA	NA	NA	NA	NA	NA	NA	NA	0.0235715	0.306415	NA	NA	NA	NA	0.320066	0.0435208	0.296701	0.0468114	NA	NA	NA	NA	NA	NA	NA	NA	NA	NA	NA
GO_ADRENERGIC_RECEPTOR_BINDING	NA	NA	NA	NA	NA	NA	0.0405341	NA	NA	NA	NA	NA	NA	NA	NA	NA	NA	0.0493772	NA	NA	NA	NA	NA	NA	NA	NA	NA	NA	NA	NA	NA	NA	NA	NA	NA	NA	NA	NA	NA	NA	NA	NA	NA	NA	NA	NA	NA	NA	NA
GO_ADULT_LOCOMOTORY_BEHAVIOR	NA	NA	NA	NA	NA	NA	0.0328044	0.687718	NA	NA	NA	NA	NA	NA	NA	NA	0.326425	0.0459734	NA	NA	NA	NA	NA	NA	NA	NA	NA	NA	NA	NA	NA	NA	NA	NA	NA	NA	NA	NA	NA	NA	NA	NA	NA	NA	NA	NA	NA	NA	NA
GO_AEROBIC_RESPIRATION	NA	NA	NA	NA	NA	0.036456	NA	NA	NA	NA	NA	NA	NA	NA	NA	NA	NA	NA	NA	NA	NA	NA	NA	NA	NA	NA	NA	NA	NA	NA	NA	NA	NA	NA	NA	NA	NA	NA	NA	NA	NA	NA	NA	NA	NA	NA	NA	NA	NA
GO_AGGRESOME	NA	NA	NA	NA	0.0113565	0.430855	NA	NA	NA	NA	NA	NA	NA	NA	NA	NA	NA	NA	NA	NA	NA	NA	NA	NA	NA	NA	NA	NA	NA	NA	NA	NA	NA	NA	NA	NA	NA	NA	NA	NA	NA	NA	NA	NA	NA	NA	NA	NA	NA
GO_AGING	NA	NA	0.216939	0.00754413	0.740033	0.0171647	NA	NA	NA	NA	NA	NA	NA	NA	NA	NA	NA	NA	NA	NA	NA	NA	NA	NA	NA	NA	0.00381673	0.186049	NA	NA	NA	NA	NA	NA	NA	NA	NA	NA	NA	NA	NA	NA	NA	NA	NA	NA	NA	NA	NA
GO_ALANINE_TRANSPORT	NA	NA	NA	NA	NA	NA	NA	0.0216622	NA	NA	NA	NA	NA	NA	NA	NA	NA	NA	NA	NA	NA	NA	NA	NA	NA	NA	NA	NA	NA	NA	NA	NA	NA	NA	NA	NA	NA	NA	NA	NA	NA	NA	NA	NA	0.0132619	0.182644	NA	NA	NA
GO_ALCOHOL_BINDING	NA	NA	NA	NA	NA	NA	NA	NA	NA	NA	NA	NA	NA	NA	NA	NA	NA	NA	NA	NA	NA	NA	NA	NA	NA	NA	NA	NA	NA	NA	NA	NA	NA	NA	NA	NA	NA	0.00113669	NA	NA	NA	NA	NA	NA	NA	NA	NA	NA	NA
GO_ALCOHOL_BIOSYNTHETIC_PROCESS	NA	NA	NA	NA	NA	NA	NA	NA	NA	NA	NA	NA	NA	NA	0.294237	0.0378717	NA	NA	NA	NA	NA	NA	NA	NA	NA	NA	0.849584	0.0200642	NA	NA	NA	NA	NA	NA	NA	NA	NA	NA	NA	NA	NA	NA	NA	NA	NA	NA	NA	NA	NA
GO_ALCOHOL_METABOLIC_PROCESS	NA	NA	NA	NA	NA	NA	NA	NA	NA	NA	NA	NA	0.0356374	0.559888	NA	NA	NA	NA	NA	NA	0.309163	0.0473875	NA	NA	NA	NA	NA	NA	NA	NA	NA	NA	NA	NA	NA	NA	NA	NA	NA	NA	NA	NA	NA	NA	NA	NA	NA	NA	NA
GO_ALDEHYDE_BIOSYNTHETIC_PROCESS	NA	NA	NA	NA	NA	NA	0.0236083	0.207375	NA	NA	NA	NA	NA	NA	NA	NA	NA	NA	NA	NA	NA	NA	NA	NA	NA	NA	NA	NA	NA	NA	NA	NA	NA	NA	NA	NA	NA	NA	NA	NA	NA	NA	NA	NA	NA	NA	NA	NA	NA
GO_ALDITOL_PHOSPHATE_METABOLIC_PROCESS	NA	NA	NA	NA	NA	NA	NA	NA	NA	NA	NA	NA	NA	NA	NA	NA	NA	NA	NA	NA	NA	NA	NA	NA	NA	NA	NA	NA	NA	NA	NA	NA	NA	NA	NA	NA	NA	NA	NA	NA	NA	NA	NA	NA	NA	NA	NA	NA	NA
GO_ALDOSTERONE_METABOLIC_PROCESS	NA	NA	NA	NA	NA	NA	NA	NA	NA	NA	NA	NA	NA	NA	NA	NA	NA	NA	NA	NA	NA	NA	NA	NA	NA	NA	NA	NA	NA	NA	NA	NA	NA	NA	NA	NA	NA	NA	NA	NA	NA	NA	NA	NA	NA	NA	NA	NA	NA
GO_ALKALI_METAL_ION_BINDING	NA	NA	NA	NA	NA	NA	NA	NA	NA	NA	NA	NA	NA	NA	NA	NA	NA	NA	NA	NA	NA	NA	NA	NA	NA	NA	NA	NA	NA	NA	NA	NA	NA	NA	NA	NA	NA	NA	NA	NA	NA	NA	NA	NA	NA	NA	NA	NA	0.00715701
GO_ALPHA_ACTININ_BINDING	NA	NA	NA	NA	NA	NA	0.000861971	0.341941	NA	NA	NA	NA	NA	NA	NA	NA	NA	NA	NA	NA	NA	NA	NA	NA	NA	NA	0.0378858	0.226687	NA	NA	NA	NA	NA	NA	NA	NA	NA	NA	NA	NA	NA	NA	NA	NA	NA	NA	NA	NA	NA
GO_ALPHA_AMINO_ACID_BIOSYNTHETIC_PROCESS	NA	NA	NA	NA	NA	NA	NA	NA	NA	NA	NA	NA	NA	NA	NA	NA	NA	NA	NA	NA	NA	NA	NA	NA	NA	NA	NA	NA	NA	NA	NA	NA	NA	NA	NA	NA	NA	NA	NA	NA	NA	NA	NA	NA	NA	NA	NA	NA	NA
GO_ALPHA_AMINO_ACID_CATABOLIC_PROCESS	NA	NA	NA	NA	NA	NA	0.500816	0.0222276	NA	NA	NA	NA	NA	NA	NA	NA	NA	NA	NA	NA	NA	NA	NA	NA	NA	NA	NA	NA	NA	NA	NA	NA	NA	NA	NA	NA	NA	NA	NA	NA	NA	NA	NA	NA	NA	NA	NA	NA	NA
GO_ALPHA_AMINO_ACID_METABOLIC_PROCESS	NA	NA	NA	NA	NA	NA	0.226657	0.013102	NA	NA	NA	NA	NA	NA	NA	NA	NA	NA	NA	NA	NA	NA	NA	NA	NA	NA	NA	NA	NA	NA	NA	NA	NA	NA	NA	NA	NA	NA	NA	NA	NA	NA	NA	NA	NA	NA	NA	NA	NA
GO_ALPHA_BETA_T_CELL_ACTIVATION	NA	NA	NA	NA	NA	NA	NA	NA	NA	NA	NA	NA	NA	NA	NA	NA	NA	NA	NA	NA	NA	NA	NA	NA	NA	NA	NA	NA	NA	NA	NA	NA	NA	NA	NA	NA	NA	NA	NA	NA	NA	NA	0.825708	0.0050438	NA	NA	NA	NA	NA
GO_ALPHA_BETA_T_CELL_ACTIVATION_INVOLVED_IN_IMMUNE_RESPONSE	NA	NA	NA	NA	NA	NA	NA	NA	NA	NA	NA	NA	NA	NA	NA	NA	NA	NA	NA	NA	NA	NA	NA	NA	0.0325431	NA	NA	NA	NA	NA	NA	NA	NA	NA	NA	NA	NA	NA	NA	NA	NA	NA	NA	0.0304448	NA	NA	NA	NA	NA
GO_ALPHA_BETA_T_CELL_DIFFERENTIATION	NA	NA	NA	NA	NA	NA	NA	NA	NA	NA	NA	NA	NA	NA	NA	NA	NA	NA	NA	NA	NA	NA	NA	NA	NA	NA	NA	NA	NA	NA	NA	NA	NA	NA	NA	NA	NA	NA	NA	NA	NA	NA	NA	NA	NA	NA	NA	NA	NA
GO_ALPHA_BETA_T_CELL_PROLIFERATION	NA	NA	NA	NA	NA	NA	NA	NA	NA	NA	NA	NA	NA	NA	NA	NA	NA	NA	NA	NA	NA	NA	NA	NA	NA	NA	NA	NA	NA	NA	NA	NA	NA	NA	NA	NA	NA	NA	NA	NA	NA	NA	NA	NA	NA	NA	NA	NA	NA
GO_ALPHA_LINOLENIC_ACID_METABOLIC_PROCESS	NA	NA	NA	NA	NA	NA	NA	NA	NA	NA	NA	NA	NA	NA	NA	NA	NA	NA	NA	NA	NA	NA	NA	NA	NA	NA	NA	NA	NA	NA	NA	NA	NA	NA	NA	NA	NA	NA	NA	NA	NA	NA	NA	NA	NA	NA	NA	NA	NA
GO_ALPHA_TUBULIN_BINDING	NA	NA	NA	NA	NA	NA	NA	0.0203937	NA	NA	NA	NA	NA	NA	NA	NA	NA	NA	NA	NA	NA	NA	NA	NA	NA	NA	NA	NA	NA	NA	NA	NA	NA	NA	NA	NA	NA	NA	NA	NA	NA	NA	NA	NA	NA	NA	NA	NA	NA
GO_ALTERNATIVE_MRNA_SPLICING_VIA_SPLICEOSOME	NA	NA	0.0244322	0.669765	NA	NA	0.409623	0.010999	NA	NA	0.0722536	0.047069	NA	NA	NA	NA	0.000418179	0.20562	NA	NA	0.0356455	0.447381	0.0323508	NA	NA	NA	0.0177142	0.199348	NA	NA	NA	NA	0.0579433	0.0112756	0.219094	1.12131e-05	NA	0.0451544	NA	NA	NA	NA	NA	NA	NA	NA	NA	NA	0.0282449
GO_AMEBOIDAL_TYPE_CELL_MIGRATION	NA	NA	NA	NA	NA	NA	NA	NA	NA	NA	NA	NA	NA	NA	NA	NA	NA	NA	NA	NA	NA	NA	NA	NA	NA	NA	NA	NA	NA	NA	NA	NA	NA	NA	0.956869	0.0099068	NA	NA	NA	NA	NA	NA	NA	NA	NA	NA	NA	NA	NA
GO_AMELOGENESIS	NA	NA	NA	NA	0.0333007	NA	NA	NA	NA	NA	NA	NA	NA	NA	NA	NA	NA	NA	NA	NA	NA	NA	NA	NA	NA	NA	NA	NA	NA	NA	NA	NA	NA	NA	NA	NA	NA	NA	NA	NA	NA	NA	NA	NA	NA	NA	NA	NA	NA
GO_AMIDE_BINDING	NA	NA	NA	NA	NA	NA	NA	NA	NA	NA	NA	NA	NA	NA	NA	NA	NA	NA	0.0315029	0.357643	NA	NA	NA	NA	NA	NA	NA	NA	NA	NA	NA	NA	NA	NA	NA	NA	NA	NA	NA	NA	NA	NA	0.664241	0.0225892	NA	NA	NA	NA	NA
GO_AMIDE_TRANSMEMBRANE_TRANSPORTER_ACTIVITY	NA	NA	NA	NA	NA	NA	NA	NA	NA	NA	NA	NA	NA	NA	NA	NA	NA	NA	NA	NA	NA	NA	NA	NA	NA	NA	NA	NA	NA	NA	NA	NA	NA	NA	NA	NA	NA	NA	NA	NA	NA	NA	NA	NA	NA	NA	NA	NA	NA
GO_AMINE_BIOSYNTHETIC_PROCESS	NA	NA	NA	NA	NA	NA	NA	NA	NA	NA	NA	NA	NA	NA	NA	NA	NA	NA	NA	NA	NA	NA	NA	NA	NA	NA	NA	NA	NA	NA	NA	NA	NA	NA	NA	NA	NA	NA	NA	NA	NA	NA	NA	NA	0.0325162	NA	NA	NA	NA
GO_AMINE_METABOLIC_PROCESS	NA	NA	NA	NA	NA	NA	NA	NA	NA	NA	NA	NA	NA	NA	NA	NA	NA	NA	NA	NA	NA	NA	NA	NA	NA	NA	NA	NA	NA	NA	NA	NA	NA	NA	NA	NA	NA	NA	NA	NA	NA	NA	NA	NA	NA	NA	NA	NA	NA
GO_AMINO_ACID_ACTIVATION	NA	NA	NA	NA	0.447087	0.0330825	0.548859	0.000909047	NA	NA	NA	NA	NA	NA	NA	NA	NA	NA	NA	NA	0.0324817	0.283737	NA	NA	NA	NA	NA	NA	NA	NA	0.0195952	0.0860229	NA	NA	0.0132629	0.0684453	NA	NA	0.0228066	0.232596	0.0394105	0.170026	NA	NA	NA	NA	NA	NA	NA
GO_AMINO_ACID_IMPORT	NA	NA	NA	NA	NA	NA	NA	NA	NA	NA	NA	NA	NA	NA	NA	NA	NA	NA	NA	NA	NA	NA	NA	NA	NA	NA	NA	NA	NA	NA	NA	NA	NA	NA	NA	NA	NA	NA	NA	NA	NA	NA	NA	NA	NA	NA	NA	NA	NA
GO_AMINO_ACID_TRANSMEMBRANE_TRANSPORT	NA	NA	NA	NA	NA	NA	NA	NA	0.487915	0.046747	NA	NA	NA	NA	NA	NA	NA	NA	NA	NA	NA	NA	NA	NA	NA	NA	NA	NA	NA	NA	NA	NA	NA	NA	NA	NA	NA	NA	NA	NA	NA	NA	NA	NA	0.00477135	0.710461	NA	NA	NA
GO_AMINO_ACID_TRANSMEMBRANE_TRANSPORTER_ACTIVITY	NA	NA	NA	NA	NA	NA	NA	NA	0.178533	0.0071941	NA	NA	NA	NA	NA	NA	NA	NA	NA	NA	NA	NA	NA	NA	NA	NA	NA	NA	NA	NA	NA	NA	NA	NA	NA	NA	NA	NA	NA	NA	NA	NA	NA	NA	0.00291122	0.668608	NA	NA	NA
GO_AMINO_ACID_TRANSPORT	NA	NA	NA	NA	NA	NA	NA	NA	0.525483	0.0279432	NA	NA	NA	NA	NA	NA	NA	NA	NA	NA	NA	NA	NA	NA	NA	NA	NA	NA	NA	NA	NA	NA	NA	NA	NA	NA	NA	NA	NA	NA	NA	NA	NA	NA	0.0383832	0.345915	NA	NA	NA
GO_AMINO_SUGAR_BIOSYNTHETIC_PROCESS	NA	NA	NA	NA	NA	NA	NA	NA	NA	NA	NA	NA	NA	NA	NA	NA	NA	NA	NA	NA	0.0141911	NA	NA	NA	NA	NA	NA	NA	NA	NA	NA	NA	NA	NA	NA	NA	NA	NA	NA	NA	0.182421	0.0160038	NA	NA	NA	NA	NA	NA	NA
GO_AMINO_SUGAR_CATABOLIC_PROCESS	NA	NA	NA	NA	NA	NA	NA	NA	NA	NA	NA	NA	NA	NA	NA	NA	NA	NA	NA	NA	0.0141911	0.0846528	NA	NA	NA	NA	NA	NA	NA	NA	NA	NA	NA	NA	NA	NA	NA	NA	NA	NA	NA	NA	0.1436	0.00831734	NA	NA	NA	NA	NA
GO_AMINO_SUGAR_METABOLIC_PROCESS	NA	NA	NA	NA	NA	NA	NA	NA	NA	NA	NA	NA	0.276601	0.0260171	NA	NA	NA	NA	NA	NA	0.115346	0.0314789	NA	NA	NA	NA	NA	NA	NA	NA	NA	NA	NA	NA	0.0642734	0.00548894	NA	NA	NA	NA	NA	NA	0.386919	0.00969977	NA	NA	NA	NA	NA
GO_AMINOACYL_TRNA_SYNTHETASE_MULTIENZYME_COMPLEX	NA	NA	NA	NA	NA	NA	NA	NA	NA	NA	NA	NA	NA	NA	NA	NA	NA	0.0158864	NA	NA	NA	NA	NA	NA	NA	NA	NA	NA	NA	NA	NA	NA	NA	NA	NA	NA	NA	0.00429764	NA	NA	NA	NA	NA	NA	NA	NA	NA	NA	NA
GO_AMINOGLYCAN_CATABOLIC_PROCESS	0.0190365	0.311086	NA	NA	NA	NA	NA	NA	NA	NA	NA	NA	NA	NA	NA	NA	NA	NA	NA	NA	NA	NA	NA	NA	NA	NA	NA	NA	NA	NA	NA	NA	NA	NA	NA	NA	NA	NA	NA	NA	NA	NA	NA	NA	NA	NA	NA	NA	NA
GO_AMINOPEPTIDASE_ACTIVITY	NA	0.0268344	NA	NA	NA	NA	0.006311	0.509969	NA	NA	NA	NA	NA	NA	NA	NA	NA	NA	NA	NA	NA	0.00373553	NA	NA	NA	NA	NA	NA	NA	NA	NA	NA	NA	NA	NA	NA	NA	NA	NA	NA	NA	NA	NA	NA	0.00212217	NA	NA	NA	NA
GO_AMMONIUM_TRANSMEMBRANE_TRANSPORTER_ACTIVITY	NA	NA	NA	NA	NA	NA	NA	NA	NA	NA	NA	NA	NA	NA	NA	NA	NA	NA	NA	0.0162641	NA	NA	NA	NA	NA	NA	NA	NA	NA	NA	NA	NA	NA	NA	NA	NA	NA	NA	NA	NA	NA	NA	NA	NA	NA	NA	NA	NA	0.00245159
GO_AMMONIUM_TRANSPORT	NA	NA	NA	NA	NA	NA	NA	NA	NA	NA	NA	NA	NA	NA	NA	NA	NA	NA	NA	0.0162641	NA	NA	NA	NA	NA	NA	NA	NA	NA	NA	NA	NA	NA	NA	NA	NA	NA	NA	NA	NA	NA	NA	NA	NA	NA	NA	NA	NA	0.00245159
GO_AMPA_GLUTAMATE_RECEPTOR_COMPLEX	NA	NA	NA	NA	NA	NA	NA	NA	NA	NA	NA	NA	NA	NA	NA	NA	0.335301	0.0109886	NA	NA	NA	NA	NA	NA	NA	NA	NA	NA	0.347018	0.0254813	NA	NA	NA	NA	NA	NA	NA	NA	NA	NA	NA	NA	NA	NA	NA	NA	NA	NA	NA
GO_AMYLOID_BETA_BINDING	0.0273592	NA	NA	NA	NA	NA	NA	NA	NA	NA	NA	NA	NA	NA	NA	NA	NA	NA	NA	NA	NA	NA	NA	NA	NA	NA	NA	NA	NA	NA	NA	NA	NA	NA	NA	NA	NA	NA	NA	NA	NA	NA	NA	NA	NA	NA	NA	NA	0.0205766
GO_AMYLOID_BETA_CLEARANCE	NA	NA	NA	NA	NA	NA	NA	NA	NA	NA	NA	NA	NA	NA	NA	NA	NA	NA	NA	NA	NA	NA	NA	NA	NA	NA	NA	NA	NA	NA	NA	NA	NA	NA	NA	NA	NA	NA	NA	NA	NA	NA	NA	NA	NA	NA	NA	NA	NA
GO_AMYLOID_BETA_FORMATION	NA	NA	NA	NA	NA	NA	0.129922	0.0218478	NA	NA	NA	NA	0.00282751	NA	0.0271392	0.356507	0.0226209	0.507051	NA	0.0431047	NA	NA	NA	NA	NA	NA	NA	NA	NA	NA	NA	NA	NA	NA	NA	NA	NA	NA	NA	NA	0.120522	0.00280444	NA	NA	NA	NA	NA	NA	NA
GO_AMYLOID_BETA_METABOLIC_PROCESS	NA	NA	NA	0.0265463	0.124994	0.0366289	0.198054	0.0435718	NA	NA	0.018885	0.0810131	0.00902121	NA	NA	NA	0.00811599	0.603582	NA	NA	NA	NA	NA	NA	NA	NA	NA	NA	NA	NA	NA	NA	NA	NA	NA	NA	NA	NA	NA	NA	0.184677	0.0073958	NA	NA	0.022536	NA	0.58615	0.0424909	0.0568261
GO_AMYLOID_FIBRIL_FORMATION	NA	NA	NA	NA	NA	NA	NA	NA	NA	NA	NA	NA	NA	NA	NA	NA	NA	0.0407011	NA	NA	0.026569	NA	NA	NA	NA	NA	NA	NA	NA	NA	NA	NA	0.013937	NA	0.013937	0.1463	NA	NA	NA	NA	NA	NA	NA	NA	NA	NA	NA	NA	NA
GO_AMYLOID_PRECURSOR_PROTEIN_BIOSYNTHETIC_PROCESS	NA	NA	NA	NA	NA	NA	NA	NA	NA	NA	0.0166187	NA	NA	NA	NA	NA	NA	NA	NA	0.0052375	NA	NA	NA	NA	NA	NA	NA	NA	NA	NA	NA	NA	NA	NA	NA	NA	NA	NA	NA	NA	NA	NA	NA	NA	NA	NA	NA	NA	NA
GO_AMYLOID_PRECURSOR_PROTEIN_CATABOLIC_PROCESS	NA	NA	NA	NA	NA	NA	0.192201	0.0414646	NA	NA	0.0179172	0.0782969	0.00830457	NA	NA	NA	0.0428628	0.596315	NA	0.0178318	NA	NA	NA	NA	NA	NA	NA	NA	NA	NA	NA	NA	NA	NA	NA	NA	NA	NA	NA	NA	0.179143	0.00689639	NA	NA	NA	NA	NA	NA	0.0548623
GO_AMYLOID_PRECURSOR_PROTEIN_METABOLIC_PROCESS	NA	NA	NA	NA	0.209705	0.0189632	NA	NA	NA	NA	NA	NA	0.0333472	0.673836	0.0310515	0.552121	NA	NA	0.745275	0.00300961	NA	NA	NA	NA	NA	NA	NA	NA	NA	NA	NA	NA	NA	NA	NA	NA	NA	NA	NA	NA	0.0960572	0.0227585	NA	NA	NA	NA	NA	NA	0.10061
GO_ANAPHASE_PROMOTING_COMPLEX	NA	NA	NA	NA	NA	NA	NA	NA	NA	NA	NA	NA	NA	NA	NA	NA	NA	NA	NA	NA	NA	NA	NA	NA	NA	NA	NA	NA	0.00520421	NA	NA	0.0201031	NA	NA	NA	NA	0.0172685	NA	NA	NA	NA	NA	NA	NA	NA	NA	NA	NA	NA
GO_ANAPHASE_PROMOTING_COMPLEX_DEPENDENT_CATABOLIC_PROCESS	NA	NA	NA	NA	NA	NA	NA	0.0390554	NA	NA	NA	NA	NA	NA	NA	NA	NA	NA	NA	NA	NA	NA	NA	NA	NA	NA	NA	NA	0.0462901	NA	NA	NA	NA	NA	NA	NA	NA	NA	NA	NA	NA	NA	NA	NA	NA	NA	NA	NA	NA
GO_ANATOMICAL_STRUCTURE_HOMEOSTASIS	NA	NA	NA	NA	NA	NA	NA	NA	NA	NA	NA	NA	NA	NA	NA	NA	NA	NA	NA	NA	0.0173012	0.830567	NA	NA	NA	NA	NA	NA	NA	NA	0.185217	0.00767253	NA	NA	NA	NA	NA	NA	NA	NA	NA	NA	NA	NA	0.482646	0.024211	NA	NA	NA
GO_ANATOMICAL_STRUCTURE_MATURATION	NA	NA	0.0294657	NA	NA	NA	NA	NA	NA	NA	NA	NA	NA	NA	NA	NA	NA	NA	NA	NA	NA	NA	NA	NA	NA	NA	NA	NA	NA	NA	NA	NA	NA	NA	NA	NA	NA	NA	NA	NA	NA	NA	NA	NA	NA	NA	0.570972	0.0032157	NA
GO_ANATOMICAL_STRUCTURE_REGRESSION	NA	NA	NA	NA	NA	NA	NA	NA	NA	NA	NA	NA	NA	NA	NA	NA	NA	NA	NA	NA	NA	NA	NA	NA	NA	NA	NA	NA	NA	NA	NA	NA	NA	NA	NA	NA	NA	NA	NA	NA	NA	NA	NA	NA	0.0188801	NA	NA	NA	NA
GO_ANDROGEN_METABOLIC_PROCESS	NA	NA	NA	NA	NA	NA	NA	NA	NA	NA	NA	NA	NA	NA	NA	NA	NA	NA	NA	NA	NA	NA	NA	NA	NA	NA	NA	NA	NA	NA	NA	NA	NA	NA	NA	0.0264461	NA	NA	NA	NA	NA	NA	NA	NA	NA	NA	NA	NA	NA
GO_ANDROGEN_RECEPTOR_BINDING	NA	NA	NA	NA	NA	NA	NA	NA	NA	NA	NA	NA	NA	NA	NA	0.0037189	NA	NA	NA	NA	0.000627588	NA	NA	NA	NA	NA	NA	NA	NA	NA	NA	NA	0.247362	0.0316394	NA	NA	NA	NA	NA	NA	NA	NA	NA	NA	NA	NA	NA	NA	NA
GO_ANDROGEN_RECEPTOR_SIGNALING_PATHWAY	NA	NA	NA	0.0169254	NA	NA	NA	NA	0.0405844	0.47129	NA	NA	NA	NA	NA	0.0123884	NA	NA	0.0482877	0.213547	0.00320125	NA	NA	NA	0.0489332	0.0583949	NA	NA	NA	NA	NA	NA	NA	NA	NA	NA	NA	NA	NA	NA	NA	NA	NA	NA	NA	NA	NA	NA	NA
GO_ANIMAL_ORGAN_FORMATION	NA	NA	NA	NA	NA	NA	NA	NA	NA	NA	NA	NA	NA	NA	NA	NA	NA	NA	NA	NA	NA	NA	NA	NA	NA	NA	NA	NA	NA	NA	NA	NA	NA	NA	NA	NA	NA	NA	NA	NA	NA	NA	NA	NA	NA	NA	0.306257	0.0171982	NA
GO_ANIMAL_ORGAN_REGENERATION	NA	NA	NA	NA	NA	NA	NA	NA	0.0443834	0.0983198	NA	NA	NA	NA	NA	NA	NA	NA	NA	NA	NA	NA	0.0220703	0.423213	NA	NA	NA	NA	NA	NA	NA	NA	NA	NA	NA	NA	NA	NA	NA	NA	NA	NA	NA	NA	NA	NA	NA	NA	NA
GO_ANION_CATION_SYMPORTER_ACTIVITY	NA	NA	NA	NA	NA	NA	NA	NA	NA	NA	NA	NA	NA	NA	NA	NA	NA	NA	NA	0.00931606	NA	NA	NA	NA	NA	NA	NA	NA	NA	NA	NA	NA	NA	NA	NA	NA	NA	NA	NA	NA	NA	NA	NA	NA	NA	NA	NA	NA	0.0118604
GO_ANION_CHANNEL_ACTIVITY	NA	NA	NA	NA	NA	NA	NA	NA	NA	NA	NA	NA	NA	NA	NA	NA	NA	NA	NA	NA	NA	NA	NA	NA	NA	NA	0.633189	0.0496836	NA	NA	NA	NA	NA	NA	NA	NA	NA	NA	NA	NA	NA	NA	NA	NA	NA	NA	NA	NA	NA
GO_ANION_HOMEOSTASIS	NA	NA	NA	NA	NA	NA	NA	NA	NA	NA	NA	NA	NA	NA	NA	NA	NA	NA	NA	NA	NA	NA	NA	NA	NA	NA	NA	NA	NA	NA	NA	NA	NA	NA	NA	NA	NA	NA	NA	NA	NA	NA	NA	NA	NA	NA	0.287229	0.0146774	NA
GO_ANION_TRANSMEMBRANE_TRANSPORT	NA	NA	NA	NA	NA	NA	NA	NA	NA	NA	NA	NA	NA	NA	NA	NA	NA	NA	0.719501	0.0259984	NA	NA	NA	NA	NA	NA	NA	NA	NA	NA	NA	NA	NA	NA	NA	NA	NA	NA	NA	NA	NA	NA	NA	NA	NA	NA	NA	NA	NA
GO_ANION_TRANSMEMBRANE_TRANSPORTER_ACTIVITY	NA	NA	NA	NA	NA	NA	NA	NA	NA	NA	NA	NA	NA	NA	NA	NA	NA	NA	0.813034	0.0289643	NA	NA	0.78051	0.0471024	NA	NA	NA	NA	NA	NA	NA	NA	NA	NA	NA	NA	NA	NA	NA	NA	NA	NA	NA	NA	NA	NA	NA	NA	NA
GO_ANNEALING_ACTIVITY	NA	NA	NA	NA	NA	NA	0.0179117	NA	NA	NA	NA	NA	NA	NA	0.0192354	NA	NA	NA	NA	NA	NA	NA	NA	NA	NA	NA	NA	NA	NA	NA	NA	NA	NA	NA	NA	NA	NA	NA	NA	NA	NA	NA	NA	NA	NA	NA	0.0201405	NA	NA
GO_ANOIKIS	NA	NA	NA	NA	NA	NA	NA	NA	NA	NA	NA	NA	0.0534881	0.0158139	NA	NA	NA	NA	NA	NA	NA	NA	0.029964	NA	0.137676	0.0382439	NA	NA	0.01753	NA	0.329886	0.0451719	0.0460157	0.289339	NA	NA	NA	0.00361125	NA	NA	NA	NA	NA	NA	NA	NA	0.0201339	NA	NA
GO_ANTERIOR_POSTERIOR_AXIS_SPECIFICATION	NA	NA	NA	NA	NA	NA	NA	NA	NA	NA	NA	NA	NA	NA	NA	NA	NA	NA	NA	NA	NA	NA	NA	NA	NA	NA	NA	NA	NA	NA	NA	NA	NA	NA	NA	0.0106117	NA	NA	NA	NA	NA	NA	NA	NA	NA	NA	NA	NA	NA
GO_ANTERIOR_POSTERIOR_PATTERN_SPECIFICATION	NA	NA	NA	NA	NA	NA	NA	NA	NA	NA	NA	NA	0.975658	0.0221642	NA	NA	NA	NA	NA	NA	NA	NA	NA	NA	NA	NA	NA	NA	NA	NA	NA	NA	NA	NA	NA	NA	NA	NA	NA	NA	NA	NA	NA	NA	NA	NA	NA	NA	NA
GO_ANTEROGRADE_AXONAL_TRANSPORT	NA	NA	NA	NA	NA	NA	NA	NA	NA	NA	NA	NA	NA	NA	NA	NA	NA	NA	NA	NA	NA	NA	NA	NA	NA	NA	NA	NA	NA	NA	NA	NA	NA	NA	NA	NA	NA	NA	NA	NA	NA	NA	NA	NA	NA	NA	NA	NA	NA
GO_ANTIGEN_PROCESSING_AND_PRESENTATION	NA	NA	0.793762	0.0283064	NA	NA	0.172122	0.00994136	NA	NA	NA	NA	0.0149988	0.297426	NA	NA	0.295097	0.00327226	NA	NA	NA	NA	NA	NA	0.00179058	0.881807	NA	NA	NA	NA	NA	NA	NA	NA	NA	NA	NA	NA	0.671691	0.0367137	NA	NA	0.0209301	0.240543	0.52051	0.0366247	NA	NA	NA
GO_ANTIGEN_PROCESSING_AND_PRESENTATION_OF_ENDOGENOUS_ANTIGEN	NA	NA	NA	NA	NA	NA	NA	NA	NA	NA	0.0287081	NA	NA	NA	0.0603809	0.0294543	NA	NA	NA	NA	NA	NA	NA	NA	NA	NA	NA	NA	NA	NA	NA	NA	NA	NA	NA	NA	NA	NA	NA	NA	NA	NA	NA	NA	NA	NA	NA	NA	NA
GO_ANTIGEN_PROCESSING_AND_PRESENTATION_OF_ENDOGENOUS_PEPTIDE_ANTIGEN	NA	NA	NA	NA	NA	NA	NA	NA	NA	NA	0.0148796	NA	NA	NA	0.249234	0.0152771	NA	NA	NA	NA	NA	NA	NA	NA	0.0411379	NA	NA	NA	NA	NA	NA	NA	NA	NA	NA	NA	NA	NA	NA	NA	NA	NA	NA	NA	NA	NA	NA	NA	NA
GO_ANTIGEN_PROCESSING_AND_PRESENTATION_OF_EXOGENOUS_PEPTIDE_ANTIGEN_VIA_MHC_CLASS_I	NA	NA	NA	NA	NA	NA	NA	NA	NA	NA	NA	NA	NA	NA	NA	NA	0.0362932	0.0558781	NA	NA	NA	NA	NA	NA	NA	NA	NA	NA	NA	NA	NA	NA	NA	NA	NA	NA	NA	NA	NA	NA	NA	NA	NA	NA	NA	NA	NA	NA	NA
GO_ANTIGEN_PROCESSING_AND_PRESENTATION_OF_PEPTIDE_ANTIGEN	NA	NA	NA	NA	NA	NA	0.203604	0.0306985	NA	NA	NA	NA	0.0256017	0.187943	NA	NA	0.186231	0.00858188	NA	NA	NA	NA	NA	NA	0.00133112	0.832016	NA	NA	NA	NA	NA	NA	NA	NA	NA	NA	NA	NA	0.60562	0.0208054	NA	NA	0.00852389	0.347378	NA	NA	NA	NA	NA
GO_ANTIGEN_PROCESSING_AND_PRESENTATION_OF_PEPTIDE_ANTIGEN_VIA_MHC_CLASS_I	NA	NA	NA	NA	NA	NA	NA	NA	NA	NA	NA	NA	NA	NA	NA	NA	NA	NA	NA	NA	NA	NA	NA	NA	0.0416434	0.596701	NA	NA	NA	NA	NA	NA	NA	NA	NA	NA	NA	NA	NA	NA	NA	NA	NA	NA	NA	NA	NA	NA	NA
GO_ANTIGEN_PROCESSING_AND_PRESENTATION_OF_PEPTIDE_OR_POLYSACCHARIDE_ANTIGEN_VIA_MHC_CLASS_II	NA	NA	NA	NA	NA	NA	0.0264442	0.215107	NA	NA	NA	NA	0.0478419	0.0802765	NA	NA	0.805441	0.0395302	NA	NA	NA	NA	NA	NA	0.000872967	NA	NA	NA	NA	NA	NA	NA	NA	NA	NA	NA	NA	NA	0.392026	0.0186288	0.0222276	0.469481	0.0352605	0.676473	NA	NA	NA	NA	NA
GO_ANTIGEN_RECEPTOR_MEDIATED_SIGNALING_PATHWAY	NA	NA	NA	NA	NA	NA	NA	NA	NA	NA	NA	NA	NA	NA	NA	NA	NA	NA	NA	NA	NA	NA	NA	NA	NA	NA	NA	NA	NA	NA	NA	NA	NA	NA	NA	NA	NA	NA	NA	NA	NA	NA	0.522248	0.00771114	NA	NA	NA	NA	NA
GO_ANTIPORTER_ACTIVITY	NA	NA	0.0209642	NA	NA	NA	NA	NA	0.0160984	0.123173	NA	NA	NA	NA	NA	NA	NA	NA	NA	NA	NA	NA	NA	NA	NA	NA	NA	NA	NA	NA	NA	NA	NA	NA	NA	NA	NA	NA	NA	NA	NA	NA	NA	NA	NA	NA	NA	NA	NA
GO_AORTA_DEVELOPMENT	NA	NA	NA	NA	NA	NA	NA	NA	NA	NA	NA	NA	NA	NA	0.636829	0.0299212	NA	NA	NA	NA	NA	NA	NA	NA	NA	NA	NA	NA	NA	NA	NA	NA	NA	NA	NA	NA	NA	NA	0.249309	0.0414827	NA	NA	NA	NA	NA	NA	NA	NA	NA
GO_AORTIC_VALVE_DEVELOPMENT	NA	NA	NA	NA	NA	NA	NA	NA	NA	NA	NA	NA	NA	NA	NA	NA	NA	NA	NA	NA	NA	NA	NA	NA	NA	NA	NA	NA	NA	NA	NA	NA	NA	NA	NA	NA	0.0349262	NA	NA	NA	NA	NA	NA	NA	NA	NA	NA	NA	NA
GO_AP_TYPE_MEMBRANE_COAT_ADAPTOR_COMPLEX	0.0467908	0.203779	NA	NA	NA	NA	NA	NA	NA	NA	0.36684	0.00643397	0.00353196	0.476102	NA	NA	0.47497	0.000799283	NA	NA	NA	NA	0.000312219	0.259593	0.0434508	NA	NA	NA	NA	NA	NA	NA	NA	NA	NA	NA	NA	NA	NA	0.0205221	NA	NA	NA	NA	NA	NA	NA	NA	0.0383632
GO_APICAL_DENDRITE	NA	NA	NA	NA	NA	NA	NA	NA	NA	NA	NA	NA	NA	NA	NA	NA	NA	NA	NA	NA	NA	NA	NA	NA	NA	NA	NA	NA	NA	NA	NA	NA	NA	NA	NA	NA	NA	NA	NA	NA	NA	NA	NA	NA	NA	NA	0.037354	0.241239	NA
GO_APICAL_JUNCTION_ASSEMBLY	NA	NA	NA	NA	NA	NA	NA	NA	NA	NA	NA	NA	NA	NA	NA	NA	NA	NA	NA	NA	NA	NA	0.00476331	NA	NA	NA	NA	NA	NA	NA	NA	NA	NA	NA	NA	NA	NA	NA	NA	NA	NA	NA	NA	NA	NA	NA	NA	NA	NA
GO_APICAL_JUNCTION_COMPLEX	NA	NA	NA	NA	NA	NA	NA	NA	0.923499	0.0191879	NA	NA	NA	NA	NA	NA	NA	NA	NA	NA	NA	NA	0.0276377	0.650436	NA	NA	NA	NA	NA	NA	NA	NA	NA	NA	NA	NA	NA	NA	NA	NA	NA	NA	NA	NA	NA	NA	0.230179	0.0223015	NA
GO_APICAL_PART_OF_CELL	0.074539	0.00281248	NA	NA	NA	NA	NA	NA	NA	NA	NA	NA	NA	NA	NA	NA	NA	NA	NA	NA	NA	NA	NA	NA	NA	NA	NA	NA	NA	NA	NA	NA	NA	NA	NA	NA	NA	NA	NA	NA	NA	NA	NA	NA	NA	NA	NA	NA	NA
GO_APICAL_PLASMA_MEMBRANE	0.190084	0.00089765	NA	NA	NA	NA	NA	NA	NA	NA	NA	NA	NA	NA	0.562671	0.0211755	NA	NA	NA	NA	NA	NA	NA	NA	NA	NA	NA	NA	NA	NA	0.24843	0.0289527	NA	NA	NA	NA	NA	NA	NA	NA	0.106108	0.0493677	NA	NA	NA	NA	NA	NA	NA
GO_APICAL_PROTEIN_LOCALIZATION	NA	NA	NA	NA	NA	NA	NA	NA	NA	NA	NA	NA	NA	NA	NA	NA	NA	NA	NA	NA	NA	NA	NA	NA	NA	NA	NA	NA	NA	NA	NA	NA	NA	NA	NA	NA	NA	NA	NA	NA	NA	NA	NA	NA	NA	NA	NA	NA	NA
GO_APICOLATERAL_PLASMA_MEMBRANE	NA	NA	NA	NA	NA	NA	NA	NA	NA	NA	NA	NA	NA	NA	NA	NA	NA	0.044961	NA	NA	NA	NA	NA	NA	NA	NA	NA	NA	0.0375153	NA	NA	NA	NA	NA	NA	NA	NA	NA	NA	NA	NA	NA	NA	NA	NA	NA	NA	NA	NA
GO_APOLIPOPROTEIN_BINDING	NA	NA	NA	NA	NA	NA	NA	NA	NA	NA	NA	NA	NA	NA	NA	NA	NA	NA	NA	NA	NA	NA	NA	NA	0.0411379	NA	NA	NA	NA	NA	NA	NA	NA	NA	NA	NA	NA	NA	NA	NA	NA	NA	NA	NA	NA	NA	NA	NA	NA
GO_APOPTOTIC_CELL_CLEARANCE	NA	NA	NA	NA	NA	NA	NA	NA	NA	NA	NA	NA	NA	NA	NA	NA	0.0450344	NA	NA	NA	NA	NA	NA	NA	NA	NA	NA	NA	NA	NA	NA	NA	NA	NA	NA	NA	NA	NA	NA	NA	NA	NA	NA	NA	NA	NA	NA	NA	NA
GO_APOPTOTIC_DNA_FRAGMENTATION	NA	NA	NA	0.042297	NA	NA	NA	NA	NA	NA	NA	NA	NA	NA	NA	NA	NA	NA	NA	NA	NA	NA	0.0180913	NA	0.39526	0.00165496	NA	NA	NA	NA	NA	NA	NA	NA	NA	NA	NA	NA	NA	NA	NA	NA	NA	NA	NA	NA	NA	NA	NA
GO_APOPTOTIC_MITOCHONDRIAL_CHANGES	NA	NA	NA	NA	NA	NA	NA	NA	0.382972	0.0374117	NA	NA	0.208118	0.0138247	NA	NA	0.30879	0.00742575	NA	NA	NA	NA	0.633349	0.013338	NA	NA	NA	NA	NA	NA	NA	NA	NA	NA	NA	NA	NA	NA	NA	NA	NA	NA	NA	NA	NA	NA	NA	NA	NA
GO_APOPTOTIC_PROCESS_INVOLVED_IN_MORPHOGENESIS	NA	NA	NA	NA	NA	NA	NA	NA	NA	NA	NA	NA	NA	NA	NA	NA	NA	NA	NA	NA	NA	NA	NA	NA	NA	NA	NA	NA	NA	NA	NA	NA	NA	NA	NA	NA	0.0237199	NA	NA	NA	NA	NA	NA	NA	0.0377045	NA	NA	NA	NA
GO_APPENDAGE_DEVELOPMENT	NA	NA	NA	NA	NA	NA	NA	NA	NA	NA	NA	NA	NA	NA	NA	NA	NA	NA	NA	NA	NA	NA	NA	NA	NA	NA	NA	NA	NA	NA	NA	NA	NA	NA	NA	NA	NA	NA	NA	NA	NA	NA	NA	NA	NA	NA	0.375476	0.0210501	NA
GO_APPENDAGE_MORPHOGENESIS	NA	NA	NA	NA	NA	NA	NA	NA	NA	NA	NA	NA	NA	NA	NA	NA	NA	NA	NA	NA	NA	NA	NA	NA	NA	NA	NA	NA	NA	NA	NA	NA	NA	NA	NA	NA	NA	NA	NA	NA	NA	NA	NA	NA	NA	NA	0.256118	0.00816074	NA
GO_ARACHIDONIC_ACID_EPOXYGENASE_ACTIVITY	NA	NA	NA	NA	NA	NA	NA	NA	NA	NA	NA	NA	NA	NA	NA	NA	NA	NA	NA	NA	NA	NA	NA	NA	NA	NA	NA	NA	NA	NA	NA	NA	NA	NA	NA	NA	NA	NA	NA	NA	NA	NA	0.000820565	NA	NA	NA	NA	NA	NA
GO_ARACHIDONIC_ACID_METABOLIC_PROCESS	0.0860622	0.0410687	0.166356	0.0369062	NA	NA	NA	NA	NA	NA	NA	NA	NA	NA	NA	NA	NA	NA	NA	NA	NA	NA	NA	NA	NA	NA	NA	NA	NA	NA	NA	NA	NA	NA	NA	NA	NA	NA	NA	NA	NA	NA	0.00494109	NA	NA	NA	NA	NA	NA
GO_ARACHIDONIC_ACID_MONOOXYGENASE_ACTIVITY	0.155907	0.00540701	NA	NA	NA	NA	NA	NA	NA	NA	NA	NA	NA	NA	NA	NA	NA	NA	NA	NA	NA	NA	NA	NA	NA	NA	NA	NA	NA	NA	NA	NA	NA	NA	NA	NA	NA	NA	NA	NA	NA	NA	0.00161305	NA	NA	NA	NA	NA	NA
GO_ARF_GUANYL_NUCLEOTIDE_EXCHANGE_FACTOR_ACTIVITY	NA	NA	NA	NA	NA	0.0298159	NA	NA	NA	NA	NA	NA	NA	NA	NA	NA	NA	NA	NA	NA	NA	NA	NA	NA	NA	NA	NA	NA	NA	NA	NA	NA	NA	NA	NA	NA	NA	NA	NA	NA	NA	NA	NA	NA	NA	NA	0.27993	0.033265	NA
GO_ARF_PROTEIN_SIGNAL_TRANSDUCTION	NA	NA	NA	NA	0.205138	0.0298159	0.0368648	NA	NA	NA	NA	NA	0.0817513	0.0349406	NA	NA	NA	NA	NA	NA	NA	NA	NA	NA	NA	NA	0.019589	NA	NA	NA	NA	NA	NA	NA	NA	NA	NA	NA	NA	NA	NA	NA	NA	NA	NA	NA	0.27993	0.033265	NA
GO_ARGININE_METABOLIC_PROCESS	NA	NA	NA	NA	NA	NA	NA	0.03728	NA	NA	NA	NA	NA	NA	NA	NA	NA	NA	NA	NA	NA	NA	NA	NA	NA	NA	NA	NA	NA	NA	NA	NA	NA	NA	NA	NA	NA	NA	NA	NA	NA	NA	NA	NA	NA	NA	NA	NA	NA
GO_ARGININE_TRANSMEMBRANE_TRANSPORT	NA	NA	NA	NA	NA	NA	NA	NA	NA	NA	NA	NA	NA	NA	NA	NA	NA	NA	NA	NA	NA	NA	NA	NA	NA	NA	NA	NA	NA	NA	NA	NA	NA	NA	NA	NA	NA	NA	NA	NA	NA	NA	NA	NA	0.00590936	NA	NA	NA	NA
GO_ARGININE_TRANSPORT	NA	NA	NA	NA	0.0102589	NA	NA	NA	NA	NA	NA	NA	NA	NA	NA	NA	NA	NA	NA	NA	NA	NA	NA	NA	NA	NA	NA	NA	NA	NA	NA	NA	NA	NA	NA	NA	NA	NA	NA	NA	NA	NA	NA	NA	0.0100061	NA	NA	NA	NA
GO_ARMADILLO_REPEAT_DOMAIN_BINDING	NA	NA	NA	NA	0.113795	0.000324468	NA	NA	NA	NA	0.105402	0.0036563	0.0249441	NA	NA	NA	0.0100188	NA	NA	NA	NA	NA	NA	NA	0.014862	0.08745	NA	NA	NA	NA	NA	NA	NA	NA	NA	NA	NA	NA	0.0466103	0.0525435	NA	NA	NA	NA	0.112401	0.00026333	0.0120191	NA	NA
GO_AROMATASE_ACTIVITY	0.190949	0.00838514	NA	NA	NA	NA	NA	NA	NA	NA	NA	NA	NA	NA	NA	NA	NA	NA	NA	NA	NA	NA	NA	NA	NA	NA	NA	NA	NA	NA	NA	NA	NA	NA	NA	NA	NA	NA	NA	NA	NA	NA	0.0350728	NA	NA	NA	NA	NA	NA
GO_AROMATIC_AMINO_ACID_FAMILY_CATABOLIC_PROCESS	NA	NA	NA	NA	NA	NA	NA	NA	NA	NA	NA	NA	NA	NA	NA	NA	NA	NA	NA	NA	NA	0.0153622	NA	NA	NA	NA	NA	NA	NA	NA	NA	NA	NA	NA	NA	NA	NA	NA	NA	NA	NA	NA	NA	NA	NA	NA	NA	NA	NA
GO_AROMATIC_AMINO_ACID_FAMILY_METABOLIC_PROCESS	NA	NA	NA	NA	NA	NA	NA	NA	NA	NA	NA	NA	NA	NA	NA	NA	NA	NA	NA	NA	NA	0.0300745	NA	NA	NA	NA	NA	NA	NA	NA	NA	NA	NA	NA	NA	NA	NA	NA	NA	NA	NA	NA	NA	NA	NA	NA	NA	NA	NA
GO_AROMATIC_AMINO_ACID_TRANSMEMBRANE_TRANSPORTER_ACTIVITY	NA	NA	NA	NA	NA	NA	NA	NA	NA	NA	NA	NA	NA	NA	NA	NA	NA	NA	NA	NA	NA	NA	NA	NA	NA	NA	NA	NA	NA	NA	NA	NA	NA	NA	NA	NA	NA	NA	NA	NA	NA	NA	NA	NA	NA	NA	NA	NA	NA
GO_ARP2_3_COMPLEX_MEDIATED_ACTIN_NUCLEATION	NA	NA	NA	0.0139285	NA	NA	NA	NA	0.0337658	0.447225	NA	NA	0.64012	0.0243882	NA	NA	NA	NA	0.0402847	0.556077	NA	NA	NA	NA	NA	NA	NA	NA	NA	NA	NA	NA	NA	NA	NA	NA	NA	NA	NA	NA	NA	NA	NA	NA	NA	NA	NA	NA	NA
GO_ARP2_3_PROTEIN_COMPLEX	NA	NA	NA	0.00810037	NA	NA	NA	NA	NA	NA	NA	NA	NA	NA	NA	NA	NA	NA	NA	NA	NA	NA	NA	NA	NA	NA	NA	NA	NA	NA	NA	NA	NA	NA	NA	NA	NA	NA	NA	NA	NA	NA	NA	NA	NA	NA	NA	NA	NA
GO_ARTERY_DEVELOPMENT	NA	NA	NA	NA	NA	NA	NA	NA	NA	NA	NA	NA	NA	NA	NA	NA	NA	NA	NA	NA	NA	NA	NA	NA	NA	NA	NA	NA	NA	NA	NA	NA	NA	NA	NA	NA	NA	NA	0.386164	0.00224581	NA	NA	NA	NA	NA	NA	NA	NA	NA
GO_ARTERY_MORPHOGENESIS	NA	NA	NA	NA	NA	NA	NA	NA	NA	NA	NA	NA	NA	NA	NA	NA	NA	NA	NA	NA	NA	NA	NA	NA	NA	NA	NA	NA	NA	NA	NA	NA	NA	NA	NA	NA	NA	NA	0.30134	0.00772342	NA	NA	NA	NA	NA	NA	NA	NA	NA
GO_ARYLSULFATASE_ACTIVITY	NA	NA	NA	NA	NA	NA	0.00131722	NA	NA	NA	NA	NA	NA	NA	NA	NA	NA	NA	NA	NA	NA	NA	NA	NA	NA	NA	NA	NA	NA	NA	NA	NA	NA	NA	NA	NA	NA	NA	NA	NA	NA	NA	NA	NA	NA	NA	NA	NA	NA
GO_ASPARTATE_FAMILY_AMINO_ACID_BIOSYNTHETIC_PROCESS	NA	NA	0.0284745	NA	NA	NA	0.0443347	NA	NA	NA	NA	NA	NA	NA	NA	NA	NA	NA	NA	NA	NA	NA	NA	NA	NA	NA	NA	NA	NA	NA	0.0247071	0.190139	NA	NA	NA	NA	NA	NA	NA	NA	NA	NA	NA	NA	NA	NA	NA	NA	NA
GO_ASPARTATE_FAMILY_AMINO_ACID_CATABOLIC_PROCESS	NA	NA	NA	NA	NA	NA	NA	NA	0.00754336	NA	NA	NA	NA	NA	NA	NA	NA	NA	NA	NA	NA	NA	NA	NA	NA	NA	NA	NA	NA	NA	NA	NA	NA	NA	NA	NA	NA	NA	NA	NA	NA	NA	NA	NA	NA	NA	NA	NA	NA
GO_ASPARTATE_FAMILY_AMINO_ACID_METABOLIC_PROCESS	NA	NA	0.0252137	NA	NA	NA	0.192201	0.0414646	0.0118252	0.523458	NA	NA	NA	NA	NA	NA	NA	NA	NA	NA	NA	NA	NA	NA	NA	NA	NA	NA	NA	NA	NA	NA	NA	NA	NA	NA	NA	NA	NA	NA	NA	NA	NA	NA	NA	NA	NA	NA	NA
GO_ASPARTIC_TYPE_PEPTIDASE_ACTIVITY	NA	NA	NA	NA	NA	NA	NA	NA	NA	NA	NA	NA	NA	NA	NA	NA	NA	NA	NA	NA	NA	NA	NA	NA	NA	NA	NA	NA	NA	NA	NA	NA	NA	NA	NA	NA	NA	NA	NA	NA	NA	NA	NA	NA	0.0350728	NA	NA	NA	NA
GO_ASSOCIATIVE_LEARNING	NA	NA	NA	NA	NA	NA	NA	NA	NA	NA	NA	NA	0.300026	0.0311985	NA	NA	0.332131	0.0478691	NA	NA	NA	NA	NA	NA	NA	NA	NA	NA	NA	NA	NA	NA	NA	NA	NA	NA	NA	NA	NA	NA	NA	NA	NA	NA	NA	NA	NA	NA	NA
GO_ASTRAL_MICROTUBULE_ORGANIZATION	NA	NA	NA	NA	NA	NA	NA	NA	0.164	0.000349119	NA	NA	NA	NA	NA	NA	NA	0.000627127	NA	NA	NA	NA	NA	NA	NA	NA	NA	NA	NA	NA	NA	NA	NA	NA	NA	NA	NA	NA	NA	NA	NA	NA	NA	NA	NA	NA	NA	NA	NA
GO_ASTROCYTE_DEVELOPMENT	NA	NA	NA	NA	NA	NA	NA	NA	NA	NA	NA	NA	NA	NA	NA	NA	0.155162	0.0468025	NA	NA	NA	NA	NA	NA	NA	NA	NA	NA	NA	NA	NA	NA	NA	NA	NA	NA	NA	NA	NA	NA	0.0317303	0.497566	NA	NA	NA	NA	NA	NA	NA
GO_ASTROCYTE_DIFFERENTIATION	NA	NA	NA	NA	NA	NA	NA	NA	NA	NA	NA	NA	NA	NA	NA	NA	0.0406945	0.187279	NA	NA	NA	NA	NA	NA	NA	NA	NA	NA	NA	NA	NA	NA	NA	NA	NA	NA	NA	NA	NA	NA	0.0390554	0.719387	NA	NA	NA	NA	NA	NA	NA
GO_ASYMMETRIC_CELL_DIVISION	NA	NA	NA	NA	NA	NA	0.0405341	NA	NA	NA	NA	NA	0.399939	0.0384299	NA	NA	NA	NA	NA	NA	NA	NA	NA	NA	NA	NA	NA	NA	NA	NA	NA	NA	NA	NA	NA	NA	NA	NA	NA	NA	NA	NA	NA	NA	NA	NA	NA	NA	NA
GO_ATF6_MEDIATED_UNFOLDED_PROTEIN_RESPONSE	NA	NA	NA	NA	NA	NA	NA	NA	NA	NA	NA	NA	NA	NA	NA	NA	NA	NA	NA	NA	NA	NA	NA	NA	NA	NA	NA	NA	0.0108653	NA	NA	NA	NA	NA	NA	NA	NA	NA	NA	NA	NA	NA	NA	NA	NA	NA	NA	NA	NA
GO_ATP_BIOSYNTHETIC_PROCESS	NA	NA	NA	NA	NA	NA	NA	NA	NA	NA	NA	NA	NA	NA	NA	NA	NA	NA	NA	NA	NA	NA	NA	NA	NA	NA	NA	NA	NA	NA	NA	NA	NA	NA	NA	NA	NA	NA	NA	NA	NA	NA	NA	NA	NA	NA	NA	NA	NA
GO_ATP_DEPENDENT_CHROMATIN_REMODELING	NA	NA	NA	NA	NA	NA	NA	NA	0.00534316	0.736988	NA	NA	NA	NA	NA	NA	NA	NA	NA	NA	NA	NA	NA	NA	NA	NA	NA	NA	NA	NA	NA	NA	NA	NA	NA	NA	NA	NA	NA	NA	NA	NA	NA	NA	NA	NA	NA	NA	NA
GO_ATP_DEPENDENT_MICROTUBULE_MOTOR_ACTIVITY	NA	NA	NA	NA	NA	NA	NA	NA	NA	NA	NA	NA	NA	NA	NA	NA	NA	NA	NA	NA	NA	NA	NA	NA	NA	NA	NA	NA	NA	NA	NA	NA	NA	NA	NA	0.0355227	NA	NA	NA	NA	NA	NA	NA	NA	NA	NA	NA	NA	NA
GO_ATP_DEPENDENT_MICROTUBULE_MOTOR_ACTIVITY_MINUS_END_DIRECTED	NA	NA	NA	NA	NA	NA	NA	NA	NA	NA	NA	NA	NA	NA	NA	NA	NA	NA	NA	NA	NA	NA	NA	NA	0.0457066	NA	NA	NA	0.0339236	0.159049	NA	NA	NA	NA	NA	0.0106103	NA	NA	NA	NA	NA	NA	NA	NA	NA	NA	NA	NA	NA
GO_ATP_TRANSMEMBRANE_TRANSPORTER_ACTIVITY	NA	NA	NA	NA	0.0386065	NA	NA	NA	NA	NA	NA	0.0239683	NA	NA	NA	NA	NA	NA	NA	NA	NA	0.000706148	NA	NA	NA	NA	NA	NA	NA	NA	NA	NA	NA	NA	0.0280877	NA	NA	NA	NA	NA	NA	NA	NA	NA	NA	NA	NA	NA	NA
GO_ATP_TRANSPORT	NA	NA	NA	NA	0.0442096	NA	NA	NA	NA	NA	NA	0.0275437	NA	NA	NA	NA	NA	NA	NA	NA	NA	0.000880989	NA	NA	NA	NA	NA	NA	NA	NA	NA	NA	NA	NA	0.0322432	NA	NA	NA	NA	NA	NA	NA	NA	NA	NA	NA	NA	NA	NA
GO_ATPASE_ACTIVATOR_ACTIVITY	NA	NA	NA	NA	NA	NA	NA	NA	NA	NA	NA	NA	NA	NA	NA	NA	NA	NA	NA	NA	NA	NA	NA	NA	NA	NA	NA	NA	NA	NA	NA	NA	NA	NA	NA	NA	NA	NA	NA	0.00793814	NA	NA	NA	NA	NA	NA	NA	NA	NA
GO_ATPASE_ACTIVITY	NA	NA	0.444631	0.00775094	0.0699126	0.0194692	0.678686	0.000900803	NA	NA	0.00275776	0.0990349	0.011335	0.651118	0.0262937	0.105049	NA	NA	NA	NA	0.00309722	0.94548	0.248629	0.0357212	NA	NA	0.00969812	0.372253	0.00160519	0.579331	NA	NA	NA	NA	NA	NA	NA	NA	NA	NA	NA	NA	0.00474853	0.4796	NA	NA	0.0147714	0.888161	NA
GO_ATPASE_ACTIVITY_COUPLED_TO_TRANSMEMBRANE_MOVEMENT_OF_IONS_ROTATIONAL_MECHANISM	NA	NA	NA	NA	NA	NA	NA	NA	NA	NA	NA	NA	NA	NA	NA	NA	NA	NA	NA	NA	NA	NA	NA	NA	NA	NA	NA	NA	NA	NA	NA	NA	NA	NA	NA	NA	NA	0.0140704	NA	NA	NA	NA	NA	NA	NA	NA	NA	NA	NA
GO_ATPASE_BINDING	NA	NA	NA	NA	NA	NA	NA	NA	NA	NA	NA	NA	NA	NA	NA	NA	0.749574	0.00506362	NA	NA	NA	NA	NA	NA	NA	NA	NA	NA	NA	NA	NA	NA	NA	NA	NA	NA	NA	NA	0.343538	0.000112642	NA	NA	NA	NA	NA	NA	NA	NA	NA
GO_ATPASE_COMPLEX	NA	NA	0.00307515	0.258602	NA	NA	0.35816	0.0321451	0.012567	0.685609	NA	NA	NA	NA	NA	NA	0.0335198	0.757352	NA	NA	NA	NA	NA	NA	NA	NA	NA	NA	0.362536	0.000102939	NA	NA	NA	NA	NA	NA	NA	NA	NA	NA	NA	NA	0.0138384	0.0519584	NA	NA	NA	NA	NA
GO_ATPASE_COUPLED_INTRAMEMBRANE_LIPID_TRANSPORTER_ACTIVITY	NA	NA	NA	NA	NA	NA	0.163485	0.0118144	NA	NA	NA	NA	0.0299857	NA	NA	NA	NA	NA	NA	0.0196172	NA	NA	NA	NA	NA	NA	NA	NA	NA	NA	NA	NA	NA	NA	NA	NA	NA	NA	NA	NA	NA	0.011512	NA	NA	NA	NA	NA	NA	NA
GO_ATPASE_COUPLED_ION_TRANSMEMBRANE_TRANSPORTER_ACTIVITY	NA	NA	NA	NA	NA	NA	NA	NA	NA	NA	NA	NA	NA	NA	NA	NA	NA	NA	NA	NA	NA	NA	NA	NA	NA	NA	NA	NA	NA	NA	NA	NA	NA	NA	NA	NA	NA	NA	NA	NA	NA	NA	NA	NA	NA	NA	NA	NA	NA
GO_ATPASE_DEPENDENT_TRANSMEMBRANE_TRANSPORT_COMPLEX	NA	NA	NA	NA	NA	0.0459332	NA	NA	NA	NA	NA	NA	NA	NA	NA	NA	NA	NA	NA	NA	NA	NA	NA	NA	NA	NA	NA	NA	NA	NA	NA	NA	NA	NA	0.0241679	NA	NA	NA	NA	NA	NA	NA	NA	NA	NA	NA	NA	NA	NA
GO_ATPASE_REGULATOR_ACTIVITY	NA	NA	NA	NA	NA	NA	NA	NA	NA	NA	NA	NA	NA	NA	NA	NA	NA	NA	NA	NA	NA	NA	NA	NA	NA	NA	NA	NA	NA	NA	NA	NA	NA	NA	NA	NA	NA	NA	NA	0.0205221	NA	NA	NA	NA	NA	NA	NA	NA	NA
GO_ATRIAL_CARDIAC_MUSCLE_CELL_TO_AV_NODE_CELL_SIGNALING	NA	NA	NA	NA	NA	NA	0.0405341	0.26649	0.048362	NA	NA	NA	NA	NA	NA	NA	NA	NA	NA	NA	NA	NA	NA	NA	NA	NA	NA	NA	0.0412453	0.175089	NA	NA	NA	NA	NA	NA	0.0143752	NA	NA	NA	NA	NA	NA	NA	NA	NA	0.0453647	NA	NA
GO_ATRIAL_SEPTUM_DEVELOPMENT	NA	NA	NA	NA	NA	NA	NA	NA	NA	NA	NA	NA	NA	NA	NA	NA	NA	NA	NA	NA	NA	NA	NA	NA	NA	NA	NA	NA	NA	NA	NA	NA	NA	NA	0.0222998	NA	0.0187999	NA	NA	NA	NA	NA	NA	NA	NA	NA	NA	NA	NA
GO_ATRIOVENTRICULAR_VALVE_DEVELOPMENT	NA	NA	NA	NA	NA	NA	NA	NA	NA	NA	NA	NA	NA	NA	NA	NA	NA	NA	NA	NA	NA	NA	NA	NA	NA	NA	NA	NA	NA	NA	NA	NA	NA	NA	0.0280877	NA	0.0237199	NA	NA	NA	NA	NA	NA	NA	NA	NA	NA	NA	NA
GO_ATTACHMENT_OF_MITOTIC_SPINDLE_MICROTUBULES_TO_KINETOCHORE	NA	NA	NA	NA	NA	NA	NA	NA	NA	NA	NA	NA	NA	NA	NA	NA	NA	NA	NA	NA	NA	NA	NA	NA	NA	NA	NA	NA	NA	NA	NA	NA	NA	NA	NA	0.00740765	NA	NA	NA	NA	0.0216622	NA	NA	NA	NA	NA	NA	NA	NA
GO_ATTACHMENT_OF_SPINDLE_MICROTUBULES_TO_KINETOCHORE	NA	NA	NA	NA	NA	NA	NA	NA	NA	NA	NA	NA	NA	NA	NA	NA	NA	NA	NA	NA	NA	NA	NA	NA	NA	NA	NA	NA	NA	NA	NA	NA	NA	NA	NA	0.0355227	NA	NA	NA	NA	NA	NA	NA	NA	NA	NA	NA	NA	NA
GO_AU_RICH_ELEMENT_BINDING	NA	NA	NA	NA	NA	NA	NA	NA	NA	NA	NA	NA	NA	NA	0.0743458	0.036648	NA	NA	NA	NA	NA	NA	NA	NA	NA	NA	NA	NA	NA	NA	NA	NA	NA	NA	NA	NA	NA	NA	NA	NA	NA	NA	NA	NA	NA	NA	NA	NA	NA
GO_AUDITORY_RECEPTOR_CELL_DEVELOPMENT	NA	NA	NA	NA	NA	NA	NA	NA	NA	NA	NA	NA	NA	NA	NA	NA	NA	NA	NA	NA	NA	NA	NA	NA	NA	NA	NA	NA	NA	0.0169859	NA	NA	NA	NA	NA	NA	NA	NA	NA	NA	NA	NA	NA	NA	NA	NA	NA	NA	NA
GO_AUDITORY_RECEPTOR_CELL_MORPHOGENESIS	NA	NA	NA	NA	NA	NA	NA	NA	NA	NA	NA	NA	NA	NA	NA	NA	NA	NA	NA	NA	NA	NA	NA	NA	NA	NA	NA	NA	NA	NA	NA	NA	NA	NA	NA	NA	NA	NA	NA	NA	NA	NA	NA	NA	NA	NA	NA	NA	NA
GO_AUTONOMIC_NERVOUS_SYSTEM_DEVELOPMENT	NA	NA	NA	NA	NA	NA	NA	NA	NA	NA	NA	NA	NA	NA	NA	NA	NA	NA	NA	NA	NA	NA	NA	NA	NA	NA	NA	NA	NA	NA	NA	NA	NA	NA	NA	NA	NA	NA	NA	NA	NA	NA	NA	NA	NA	NA	NA	0.0345676	0.0491216
GO_AUTOPHAGIC_CELL_DEATH	NA	NA	NA	NA	NA	NA	NA	NA	NA	NA	NA	NA	NA	NA	NA	NA	NA	NA	NA	NA	NA	NA	NA	NA	NA	0.00429764	NA	NA	NA	NA	NA	NA	NA	NA	NA	NA	NA	NA	NA	NA	NA	NA	NA	NA	NA	NA	NA	NA	NA
GO_AUTOPHAGOSOME	NA	NA	NA	NA	NA	NA	NA	NA	NA	NA	NA	NA	NA	NA	NA	NA	NA	NA	NA	NA	NA	NA	NA	NA	NA	NA	NA	NA	NA	NA	NA	NA	NA	NA	NA	NA	NA	NA	NA	NA	0.0176632	0.43908	NA	NA	0.0292383	0.733001	NA	NA	NA
GO_AUTOPHAGOSOME_MATURATION	NA	NA	NA	NA	NA	NA	NA	NA	NA	NA	NA	NA	NA	NA	NA	NA	NA	NA	NA	NA	NA	NA	NA	NA	0.040832	0.30673	NA	NA	NA	NA	NA	NA	NA	NA	NA	NA	NA	NA	NA	NA	NA	NA	NA	NA	NA	NA	NA	NA	NA
GO_AUTOPHAGOSOME_MEMBRANE	NA	NA	NA	NA	NA	NA	NA	NA	NA	NA	NA	NA	NA	NA	NA	NA	NA	NA	NA	NA	NA	NA	NA	NA	NA	NA	NA	NA	NA	NA	NA	NA	NA	NA	NA	NA	NA	NA	NA	NA	0.0203937	0.112907	NA	NA	NA	NA	NA	NA	NA
GO_AUTOPHAGOSOME_ORGANIZATION	NA	NA	NA	NA	0.333791	0.00302579	NA	NA	NA	NA	NA	NA	NA	NA	NA	NA	NA	NA	NA	NA	NA	NA	NA	NA	0.0119428	0.596701	NA	NA	NA	NA	0.0289641	NA	NA	NA	NA	NA	NA	NA	NA	NA	0.00425335	0.190105	0.328168	0.0222106	NA	NA	0.00157227	0.445945	0.0391789
GO_AUTOPHAGY_OF_MITOCHONDRION	NA	NA	NA	0.017817	0.245102	0.00555012	0.134645	0.0074036	NA	NA	NA	9.2204e-05	0.0146841	0.712592	NA	NA	NA	NA	NA	NA	NA	NA	0.0252623	0.113402	NA	NA	0.228487	0.00673243	NA	NA	NA	NA	0.189653	0.0446396	0.0457868	NA	NA	0.00587678	0.314602	0.00890633	0.0334646	0.337247	NA	NA	NA	NA	0.000409292	0.702865	NA
GO_AUTOPHAGY_OF_NUCLEUS	NA	NA	NA	NA	NA	NA	NA	NA	NA	NA	NA	NA	NA	NA	NA	NA	NA	NA	NA	NA	NA	NA	NA	NA	0.0285789	NA	NA	NA	NA	NA	NA	NA	NA	NA	NA	NA	NA	NA	NA	NA	NA	NA	NA	NA	NA	NA	NA	NA	NA
GO_AV_NODE_CELL_TO_BUNDLE_OF_HIS_CELL_COMMUNICATION	NA	NA	NA	NA	NA	NA	0.0153172	0.169651	NA	NA	NA	NA	NA	NA	NA	NA	NA	NA	NA	NA	NA	NA	NA	NA	NA	NA	NA	NA	NA	NA	NA	NA	NA	NA	NA	NA	NA	NA	NA	NA	NA	NA	NA	NA	NA	NA	NA	NA	NA
GO_AXIS_ELONGATION	NA	NA	NA	NA	NA	NA	NA	NA	NA	NA	NA	NA	NA	NA	NA	NA	NA	NA	NA	NA	NA	NA	NA	NA	NA	NA	NA	NA	NA	NA	NA	NA	NA	NA	NA	NA	NA	NA	NA	NA	NA	NA	NA	NA	NA	NA	NA	NA	NA
GO_AXIS_SPECIFICATION	NA	NA	NA	NA	NA	NA	NA	NA	NA	NA	NA	NA	NA	NA	NA	NA	NA	NA	NA	NA	NA	NA	NA	NA	0.0269562	NA	NA	NA	NA	NA	NA	NA	NA	NA	NA	0.00744685	NA	NA	NA	NA	NA	NA	NA	NA	NA	NA	NA	NA	NA
GO_AXO_DENDRITIC_TRANSPORT	NA	NA	NA	NA	NA	NA	0.679455	0.0227013	NA	NA	NA	NA	NA	NA	NA	NA	0.29772	0.037138	NA	NA	NA	NA	NA	NA	NA	NA	NA	NA	NA	NA	NA	NA	0.0338219	NA	NA	0.0234618	0.477386	0.026051	NA	NA	NA	NA	NA	NA	NA	NA	NA	NA	NA
GO_AXON_CYTOPLASM	NA	NA	NA	NA	NA	NA	NA	NA	NA	NA	NA	NA	0.0142308	0.223747	NA	NA	NA	NA	NA	NA	NA	NA	NA	NA	NA	NA	NA	NA	NA	NA	NA	NA	0.0198684	0.436146	NA	NA	NA	NA	NA	NA	NA	NA	0.146472	0.0235005	0.0300803	NA	NA	NA	NA
GO_AXON_ENSHEATHMENT_IN_CENTRAL_NERVOUS_SYSTEM	NA	NA	NA	NA	NA	NA	NA	NA	NA	NA	NA	NA	NA	NA	NA	NA	NA	NA	NA	NA	NA	NA	NA	NA	NA	NA	NA	NA	NA	NA	NA	NA	NA	NA	NA	NA	NA	NA	NA	NA	NA	NA	NA	NA	NA	NA	NA	NA	NA
GO_AXON_EXTENSION	NA	0.030953	NA	NA	NA	NA	NA	NA	0.890276	0.00229248	NA	NA	0.199221	0.0128486	NA	NA	0.300276	0.0236975	NA	NA	0.0313524	NA	NA	NA	NA	NA	NA	NA	NA	NA	NA	NA	NA	NA	NA	NA	NA	NA	NA	NA	NA	NA	NA	NA	NA	NA	0.160608	0.000592967	NA
GO_AXON_INITIAL_SEGMENT	NA	NA	NA	NA	NA	NA	NA	NA	NA	NA	NA	NA	NA	NA	NA	NA	NA	NA	NA	0.0448285	NA	NA	NA	NA	NA	NA	NA	NA	NA	NA	NA	NA	0.158427	0.0122279	NA	NA	NA	NA	NA	NA	NA	NA	NA	NA	NA	NA	0.0335765	0.229507	NA
GO_AXONAL_GROWTH_CONE	NA	NA	NA	NA	NA	NA	NA	NA	NA	NA	NA	NA	NA	0.0102238	NA	NA	NA	NA	NA	NA	NA	NA	NA	NA	NA	NA	NA	NA	NA	0.0312443	NA	NA	NA	NA	NA	NA	NA	NA	NA	NA	NA	NA	NA	NA	NA	NA	NA	NA	NA
GO_AXONAL_TRANSPORT	NA	NA	NA	NA	NA	NA	NA	NA	NA	NA	NA	NA	NA	NA	NA	NA	NA	NA	NA	NA	NA	NA	NA	NA	NA	NA	NA	NA	NA	NA	NA	NA	0.0217554	NA	NA	NA	NA	NA	NA	NA	NA	NA	NA	NA	0.0328551	NA	NA	NA	NA
GO_AXONAL_TRANSPORT_OF_MITOCHONDRION	NA	NA	NA	NA	NA	NA	NA	NA	NA	NA	NA	NA	0.0472148	0.197952	NA	NA	NA	NA	NA	NA	NA	NA	NA	NA	NA	NA	NA	NA	NA	NA	NA	NA	NA	NA	NA	NA	NA	NA	NA	NA	NA	NA	NA	NA	NA	NA	NA	NA	NA
GO_AXONEME_ASSEMBLY	NA	NA	NA	NA	NA	NA	NA	NA	NA	NA	NA	NA	NA	NA	NA	NA	NA	NA	NA	NA	NA	NA	NA	NA	NA	NA	NA	NA	NA	NA	NA	NA	NA	NA	NA	NA	NA	NA	0.0439327	NA	NA	NA	NA	NA	NA	NA	NA	NA	NA
GO_AZOLE_TRANSMEMBRANE_TRANSPORT	NA	NA	NA	NA	0.0087494	0.159114	NA	NA	NA	NA	NA	NA	NA	NA	NA	NA	NA	NA	NA	NA	NA	NA	NA	NA	NA	NA	NA	NA	NA	NA	NA	NA	NA	NA	NA	NA	NA	NA	NA	NA	0.0140346	NA	NA	NA	NA	NA	NA	NA	NA
GO_AZOLE_TRANSMEMBRANE_TRANSPORTER_ACTIVITY	NA	NA	NA	NA	NA	NA	NA	NA	NA	NA	NA	NA	NA	NA	NA	NA	NA	NA	NA	NA	NA	NA	NA	NA	NA	NA	NA	NA	NA	NA	NA	NA	NA	NA	NA	NA	NA	NA	NA	NA	0.0118144	NA	NA	NA	NA	NA	NA	NA	NA
GO_AZUROPHIL_GRANULE	NA	NA	NA	NA	0.0393025	0.383758	NA	NA	NA	NA	NA	NA	NA	NA	NA	NA	NA	NA	NA	NA	0.00683586	0.283015	NA	NA	0.0299042	0.168078	NA	NA	0.462529	0.000743784	NA	NA	0.465044	0.0198112	NA	0.0473552	NA	NA	NA	NA	NA	NA	NA	NA	NA	NA	NA	NA	NA
GO_AZUROPHIL_GRANULE_LUMEN	NA	NA	NA	NA	NA	NA	NA	NA	NA	NA	NA	NA	NA	NA	NA	NA	NA	NA	NA	NA	0.0409872	NA	NA	NA	NA	NA	NA	NA	0.184407	0.00182209	NA	NA	NA	NA	NA	0.00836526	NA	NA	NA	NA	NA	NA	0.662886	0.0168406	NA	NA	NA	NA	NA
GO_AZUROPHIL_GRANULE_MEMBRANE	NA	NA	NA	NA	NA	NA	NA	NA	NA	NA	NA	NA	NA	NA	NA	NA	NA	NA	NA	NA	0.0496133	0.326383	NA	NA	NA	NA	NA	NA	NA	NA	NA	NA	NA	NA	NA	NA	NA	NA	NA	NA	NA	NA	NA	NA	0.499641	0.0424083	NA	NA	NA
GO_B_CELL_ACTIVATION	NA	NA	NA	NA	NA	NA	NA	NA	NA	NA	NA	NA	NA	NA	NA	NA	NA	NA	NA	NA	NA	NA	NA	NA	NA	NA	NA	NA	NA	NA	NA	NA	NA	NA	NA	NA	NA	NA	NA	NA	NA	NA	NA	NA	NA	NA	NA	NA	NA
GO_B_CELL_ACTIVATION_INVOLVED_IN_IMMUNE_RESPONSE	NA	NA	NA	NA	NA	NA	0.0401453	NA	NA	NA	NA	NA	NA	NA	NA	NA	NA	NA	NA	NA	NA	NA	NA	NA	NA	NA	NA	NA	NA	NA	NA	NA	NA	NA	NA	NA	NA	NA	NA	NA	NA	NA	NA	NA	NA	0.00434695	0.74967	0.00748282	NA
GO_B_CELL_APOPTOTIC_PROCESS	NA	NA	NA	NA	NA	NA	NA	NA	NA	NA	NA	NA	NA	NA	NA	NA	NA	NA	NA	NA	NA	NA	NA	NA	NA	NA	NA	NA	NA	NA	NA	NA	NA	NA	NA	NA	NA	NA	NA	NA	NA	NA	NA	NA	NA	NA	NA	NA	0.0163617
GO_B_CELL_DIFFERENTIATION	NA	NA	NA	NA	NA	NA	NA	NA	0.0356244	0.600575	NA	NA	NA	NA	NA	NA	NA	NA	NA	NA	NA	NA	0.0240947	NA	NA	NA	NA	NA	NA	NA	NA	NA	NA	NA	NA	0.0323703	NA	NA	NA	NA	NA	NA	NA	NA	NA	0.0368822	NA	NA	NA
GO_B_CELL_HOMEOSTASIS	NA	NA	NA	NA	0.0471172	0.342291	NA	NA	NA	NA	NA	NA	NA	NA	NA	NA	NA	NA	NA	NA	NA	NA	NA	NA	NA	NA	NA	NA	NA	NA	NA	NA	NA	NA	NA	NA	NA	NA	NA	NA	NA	NA	NA	NA	0.04603	0.322983	NA	NA	0.00133652
GO_B_CELL_PROLIFERATION	NA	NA	NA	NA	NA	NA	NA	NA	NA	NA	NA	NA	NA	NA	NA	NA	NA	NA	NA	NA	NA	NA	NA	NA	NA	NA	NA	NA	NA	NA	NA	NA	NA	NA	NA	NA	NA	NA	NA	NA	NA	NA	NA	NA	NA	NA	NA	NA	0.0372269
GO_BARBED_END_ACTIN_FILAMENT_CAPPING	NA	NA	0.042297	NA	NA	NA	0.0081595	NA	NA	NA	NA	NA	0.00383478	NA	NA	NA	NA	0.0109886	NA	NA	NA	NA	NA	NA	NA	NA	NA	NA	NA	NA	0.0368109	NA	NA	NA	NA	NA	NA	NA	0.00676414	0.130982	NA	NA	NA	NA	NA	NA	NA	NA	NA
GO_BASAL_PART_OF_CELL	NA	NA	NA	NA	NA	NA	NA	NA	NA	NA	NA	NA	0.828688	0.022859	NA	NA	0.291953	0.00148662	0.144271	0.00260469	NA	NA	NA	NA	NA	NA	NA	NA	0.102064	0.0285239	NA	NA	NA	NA	NA	NA	NA	NA	NA	NA	NA	NA	NA	NA	NA	NA	NA	NA	NA
GO_BASAL_PLASMA_MEMBRANE	NA	NA	NA	NA	NA	NA	NA	NA	NA	NA	NA	NA	NA	0.00820914	0.0535122	0.00255734	0.551415	0.0131586	0.0730527	0.0035006	NA	NA	NA	NA	NA	NA	NA	NA	NA	NA	NA	NA	NA	NA	NA	NA	NA	NA	NA	NA	NA	NA	NA	NA	NA	NA	NA	NA	NA
GO_BASE_EXCISION_REPAIR	NA	NA	0.39877	0.0139285	NA	NA	NA	NA	NA	NA	NA	NA	NA	NA	NA	NA	NA	NA	NA	NA	NA	NA	NA	NA	NA	NA	0.0106785	0.316805	0.0269628	0.319658	NA	NA	NA	NA	NA	NA	NA	NA	NA	NA	0.0233572	0.457591	NA	NA	NA	NA	NA	NA	NA
GO_BASE_EXCISION_REPAIR_AP_SITE_FORMATION	NA	NA	NA	NA	NA	NA	NA	NA	NA	NA	NA	NA	NA	NA	NA	NA	NA	NA	NA	NA	NA	NA	NA	NA	NA	NA	NA	NA	NA	NA	NA	0.00423592	NA	NA	NA	NA	NA	NA	NA	NA	NA	NA	NA	NA	NA	NA	NA	NA	NA
GO_BASEMENT_MEMBRANE	0.583045	0.0195705	NA	NA	NA	NA	NA	NA	NA	NA	NA	NA	NA	NA	NA	NA	0.0773675	0.0381676	0.00355892	0.876884	NA	NA	NA	NA	NA	NA	NA	NA	0.0264306	NA	NA	NA	0.0204989	NA	NA	NA	0.0151879	0.241292	NA	NA	NA	NA	NA	NA	NA	NA	NA	NA	NA
GO_BASEMENT_MEMBRANE_ASSEMBLY	NA	NA	NA	NA	NA	NA	NA	NA	NA	NA	NA	NA	NA	NA	0.0253324	NA	0.209872	0.028932	NA	NA	NA	NA	NA	NA	NA	NA	NA	NA	0.0240345	0.134407	NA	NA	NA	NA	NA	NA	NA	NA	0.069103	0.00287732	NA	0.0211193	NA	NA	NA	NA	0.0265101	0.205498	NA
GO_BASEMENT_MEMBRANE_ORGANIZATION	NA	NA	NA	NA	NA	NA	NA	NA	NA	NA	NA	NA	NA	NA	NA	NA	NA	NA	NA	NA	NA	NA	NA	NA	NA	NA	NA	0.0326137	0.0124717	0.250834	NA	NA	NA	NA	NA	NA	NA	NA	0.133479	0.0113112	NA	NA	NA	NA	NA	NA	NA	NA	NA
GO_BASIC_AMINO_ACID_TRANSMEMBRANE_TRANSPORT	NA	NA	NA	NA	NA	NA	NA	NA	0.221824	0.0174307	NA	NA	NA	NA	NA	NA	NA	NA	NA	NA	NA	NA	NA	NA	NA	NA	NA	NA	NA	NA	NA	NA	NA	NA	NA	NA	NA	NA	NA	NA	NA	NA	NA	NA	0.0115834	NA	NA	NA	NA
GO_BASIC_AMINO_ACID_TRANSMEMBRANE_TRANSPORTER_ACTIVITY	NA	NA	NA	NA	NA	NA	NA	NA	NA	NA	NA	NA	NA	NA	NA	NA	NA	NA	NA	NA	NA	NA	NA	NA	NA	NA	NA	NA	NA	NA	NA	NA	NA	NA	NA	NA	NA	NA	NA	NA	NA	NA	NA	NA	0.0169128	0.20434	NA	NA	NA
GO_BASIC_AMINO_ACID_TRANSPORT	NA	NA	NA	NA	0.0214545	NA	0.26538	0.0338895	0.288529	0.0312175	NA	NA	NA	NA	NA	NA	NA	NA	NA	NA	NA	NA	NA	NA	NA	NA	NA	NA	NA	NA	NA	NA	NA	NA	NA	NA	NA	NA	NA	NA	0.0338895	NA	NA	NA	0.0209385	NA	NA	NA	NA
GO_BASOLATERAL_PLASMA_MEMBRANE	NA	NA	0.0370974	0.200848	NA	NA	NA	NA	NA	NA	NA	NA	0.42626	0.0400507	NA	NA	0.337809	0.00507421	0.190396	0.0112457	NA	NA	NA	NA	NA	NA	NA	NA	NA	NA	NA	NA	NA	NA	NA	NA	NA	NA	NA	NA	NA	NA	NA	NA	NA	NA	0.00115029	0.320269	NA
GO_BENZENE_CONTAINING_COMPOUND_METABOLIC_PROCESS	NA	NA	NA	NA	NA	NA	NA	NA	NA	NA	NA	NA	NA	NA	NA	NA	NA	NA	NA	NA	NA	0.0123544	NA	NA	NA	NA	NA	NA	NA	NA	NA	NA	NA	NA	NA	NA	NA	NA	NA	NA	NA	NA	NA	NA	NA	NA	NA	NA	NA
GO_BETA_CATENIN_BINDING	NA	NA	NA	NA	NA	NA	0.0483456	0.376486	NA	NA	NA	NA	NA	NA	NA	NA	NA	NA	NA	0.0282366	NA	NA	NA	NA	NA	NA	NA	NA	NA	NA	0.632892	0.0016218	NA	NA	0.00169688	NA	0.545371	0.0426264	NA	NA	NA	NA	NA	NA	NA	NA	NA	NA	NA
GO_BETA_CATENIN_DESTRUCTION_COMPLEX_DISASSEMBLY	NA	NA	NA	NA	NA	NA	NA	NA	NA	NA	NA	NA	NA	NA	NA	NA	NA	NA	NA	NA	NA	NA	NA	NA	NA	NA	NA	NA	NA	NA	NA	NA	NA	NA	NA	NA	NA	NA	NA	NA	NA	NA	NA	NA	NA	NA	NA	0.0400507	NA
GO_BETA_CATENIN_TCF_COMPLEX	NA	NA	NA	NA	NA	NA	0.0129002	0.156683	NA	NA	NA	NA	0.000114198	NA	NA	NA	NA	NA	NA	0.0196172	NA	NA	NA	NA	0.0179369	NA	NA	NA	NA	NA	NA	NA	NA	NA	0.00524751	NA	NA	NA	NA	NA	NA	NA	NA	NA	0.00716641	0.137469	NA	NA	0.00298157
GO_BETA_CATENIN_TCF_COMPLEX_ASSEMBLY	NA	NA	NA	NA	NA	NA	NA	NA	NA	NA	0.043339	0.243751	0.0390386	NA	NA	NA	NA	NA	NA	NA	0.00871236	0.184709	NA	NA	NA	NA	NA	NA	NA	NA	NA	0.0359423	0.0366233	0.260178	NA	NA	NA	0.0303614	NA	NA	NA	NA	0.300851	0.0411711	0.0489417	0.0604707	NA	NA	0.021474
GO_BETA_TUBULIN_BINDING	NA	NA	NA	NA	NA	NA	0.451657	0.0189948	NA	NA	NA	NA	NA	NA	NA	NA	NA	NA	NA	NA	NA	NA	NA	NA	NA	NA	NA	NA	NA	NA	NA	NA	NA	NA	NA	NA	NA	NA	NA	NA	NA	NA	NA	NA	NA	NA	NA	NA	NA
GO_BH_DOMAIN_BINDING	NA	NA	NA	NA	NA	NA	NA	NA	NA	NA	NA	NA	NA	NA	NA	NA	NA	NA	NA	NA	NA	NA	NA	NA	NA	NA	NA	NA	NA	NA	NA	NA	NA	NA	NA	NA	NA	NA	NA	NA	NA	NA	NA	NA	NA	NA	NA	NA	NA
GO_BHLH_TRANSCRIPTION_FACTOR_BINDING	NA	NA	NA	NA	NA	NA	NA	NA	NA	NA	NA	NA	0.00574091	0.366888	NA	NA	NA	NA	NA	NA	NA	NA	NA	NA	NA	NA	NA	NA	NA	0.0312443	NA	NA	NA	NA	NA	NA	0.0291049	NA	NA	NA	NA	NA	0.04603	NA	0.292454	0.00665041	NA	NA	NA
GO_BICARBONATE_TRANSMEMBRANE_TRANSPORTER_ACTIVITY	NA	NA	NA	NA	NA	NA	NA	NA	NA	NA	NA	NA	NA	NA	NA	NA	NA	NA	NA	NA	NA	NA	NA	NA	NA	0.0154594	NA	NA	NA	NA	NA	NA	NA	NA	NA	NA	NA	NA	NA	NA	NA	NA	NA	NA	NA	NA	NA	NA	NA
GO_BICARBONATE_TRANSPORT	NA	NA	NA	NA	NA	NA	NA	NA	NA	NA	NA	NA	NA	NA	NA	NA	NA	NA	NA	NA	NA	NA	NA	NA	NA	NA	NA	NA	NA	NA	NA	NA	NA	NA	NA	NA	NA	NA	NA	NA	NA	NA	NA	NA	NA	NA	NA	NA	NA
GO_BINDING_OF_SPERM_TO_ZONA_PELLUCIDA	NA	NA	NA	NA	NA	NA	NA	NA	NA	NA	NA	NA	NA	NA	NA	NA	NA	NA	NA	NA	NA	NA	NA	NA	NA	NA	NA	NA	NA	NA	NA	NA	NA	NA	NA	NA	NA	NA	NA	NA	NA	NA	NA	0.0110548	NA	NA	NA	NA	NA
GO_BIOLOGICAL_PHASE	NA	NA	NA	NA	NA	NA	NA	NA	NA	NA	NA	NA	NA	NA	NA	NA	NA	NA	NA	NA	NA	NA	NA	NA	NA	NA	NA	NA	NA	NA	NA	NA	NA	NA	NA	NA	NA	NA	NA	NA	NA	NA	NA	NA	NA	NA	NA	0.0115873	NA
GO_BLASTOCYST_DEVELOPMENT	NA	NA	NA	NA	NA	NA	NA	NA	NA	NA	NA	NA	NA	NA	NA	NA	NA	NA	NA	NA	NA	NA	NA	NA	NA	NA	NA	NA	NA	NA	NA	NA	0.0211556	0.648899	NA	NA	NA	NA	NA	NA	NA	NA	NA	NA	NA	NA	NA	NA	NA
GO_BLASTOCYST_FORMATION	NA	NA	NA	NA	NA	NA	NA	NA	NA	NA	NA	NA	NA	NA	NA	NA	NA	NA	NA	NA	NA	NA	0.038573	NA	NA	NA	NA	NA	NA	NA	NA	NA	NA	NA	NA	NA	NA	NA	NA	NA	NA	NA	NA	NA	NA	NA	NA	NA	NA
GO_BLOOD_VESSEL_ENDOTHELIAL_CELL_DIFFERENTIATION	NA	NA	NA	NA	NA	NA	NA	NA	NA	NA	NA	NA	NA	NA	NA	NA	NA	NA	NA	NA	NA	NA	NA	NA	NA	NA	NA	NA	NA	NA	NA	NA	NA	NA	0.105588	0.00397026	NA	NA	NA	NA	NA	NA	NA	NA	NA	0.00901932	NA	0.0115873	NA
GO_BLOOD_VESSEL_REMODELING	NA	NA	NA	NA	NA	NA	NA	NA	NA	NA	NA	NA	NA	NA	NA	NA	NA	NA	NA	NA	NA	NA	NA	NA	NA	NA	NA	NA	NA	NA	NA	NA	NA	NA	NA	NA	NA	NA	NA	NA	NA	NA	NA	NA	NA	NA	NA	NA	0.045425
GO_BODY_FLUID_SECRETION	NA	NA	NA	NA	NA	NA	NA	NA	NA	NA	NA	NA	NA	NA	NA	NA	NA	NA	NA	NA	0.0467585	NA	0.533242	0.0323529	NA	NA	NA	NA	NA	NA	NA	NA	NA	NA	NA	NA	NA	NA	NA	NA	NA	NA	NA	NA	0.103296	0.0384814	NA	NA	0.0353265
GO_BODY_MORPHOGENESIS	NA	NA	NA	NA	NA	NA	NA	NA	NA	NA	NA	NA	NA	NA	NA	NA	NA	NA	NA	NA	NA	NA	NA	NA	NA	NA	NA	NA	0.0452406	0.0800204	NA	NA	NA	NA	NA	NA	NA	NA	0.208734	0.00233071	NA	NA	NA	NA	NA	NA	NA	NA	NA
GO_BONE_CELL_DEVELOPMENT	NA	NA	NA	NA	NA	NA	NA	NA	NA	NA	NA	NA	NA	NA	NA	NA	NA	NA	NA	NA	NA	NA	NA	NA	NA	NA	NA	NA	NA	NA	NA	NA	NA	NA	NA	NA	NA	NA	NA	NA	NA	NA	NA	NA	NA	NA	NA	NA	NA
GO_BONE_DEVELOPMENT	NA	NA	NA	NA	NA	NA	NA	NA	NA	NA	NA	NA	NA	NA	NA	NA	NA	NA	NA	NA	NA	NA	NA	NA	NA	NA	NA	NA	NA	NA	NA	NA	NA	NA	NA	NA	NA	NA	NA	NA	NA	NA	0.912202	0.00652994	0.0342561	0.287357	NA	NA	NA
GO_BONE_GROWTH	NA	NA	NA	NA	NA	NA	NA	NA	NA	NA	NA	NA	NA	NA	NA	NA	NA	NA	NA	NA	NA	NA	0.0252238	0.203231	NA	NA	NA	NA	0.398443	0.0353438	NA	NA	NA	NA	0.26995	0.0299479	NA	NA	NA	NA	NA	NA	NA	0.00442438	NA	NA	NA	NA	NA
GO_BONE_MORPHOGENESIS	NA	NA	NA	NA	NA	NA	NA	NA	NA	NA	NA	NA	NA	NA	NA	NA	NA	NA	NA	NA	NA	NA	0.0393155	0.150228	NA	NA	NA	NA	NA	NA	NA	NA	NA	NA	NA	NA	NA	NA	NA	NA	NA	NA	NA	0.0187468	NA	NA	NA	NA	NA
GO_BRANCH_ELONGATION_OF_AN_EPITHELIUM	NA	NA	NA	NA	NA	NA	NA	NA	NA	NA	NA	NA	NA	NA	NA	NA	NA	NA	NA	NA	NA	NA	NA	NA	NA	NA	NA	NA	NA	NA	NA	NA	NA	NA	NA	NA	NA	NA	NA	NA	NA	NA	NA	NA	NA	NA	NA	NA	NA
GO_BRANCHED_CHAIN_AMINO_ACID_METABOLIC_PROCESS	NA	NA	NA	NA	NA	NA	NA	NA	NA	NA	NA	NA	NA	NA	NA	NA	NA	NA	0.0115465	NA	NA	NA	NA	NA	NA	NA	NA	NA	NA	NA	NA	NA	NA	NA	0.0260976	0.197262	NA	NA	NA	NA	NA	NA	NA	NA	NA	NA	NA	NA	NA
GO_BRANCHED_CHAIN_AMINO_ACID_TRANSPORT	NA	NA	NA	NA	NA	NA	NA	NA	NA	NA	NA	NA	NA	NA	NA	NA	NA	NA	NA	NA	NA	NA	NA	NA	NA	NA	NA	NA	NA	NA	NA	NA	NA	NA	NA	NA	NA	NA	NA	NA	NA	NA	NA	NA	NA	0.0107285	NA	NA	NA
GO_BRANCHING_INVOLVED_IN_BLOOD_VESSEL_MORPHOGENESIS	NA	NA	NA	NA	NA	NA	NA	NA	NA	NA	NA	NA	NA	NA	NA	NA	NA	NA	NA	NA	NA	NA	NA	NA	NA	NA	NA	NA	NA	NA	NA	NA	NA	NA	NA	NA	NA	NA	NA	NA	NA	NA	NA	NA	NA	NA	NA	NA	NA
GO_BRANCHING_INVOLVED_IN_MAMMARY_GLAND_DUCT_MORPHOGENESIS	NA	NA	NA	0.000215985	NA	NA	NA	NA	NA	NA	NA	NA	NA	NA	NA	NA	NA	NA	NA	NA	NA	NA	NA	NA	NA	0.0199596	NA	NA	NA	NA	NA	NA	NA	NA	NA	NA	NA	NA	NA	NA	NA	NA	NA	NA	NA	NA	NA	NA	NA
GO_BRANCHING_INVOLVED_IN_SALIVARY_GLAND_MORPHOGENESIS	NA	NA	NA	NA	NA	NA	NA	NA	NA	NA	NA	NA	NA	NA	NA	NA	NA	NA	NA	NA	NA	NA	NA	NA	NA	NA	NA	NA	NA	NA	NA	NA	NA	NA	NA	NA	NA	NA	NA	NA	NA	0.0470196	NA	NA	NA	NA	NA	NA	0.0129262
GO_BRANCHING_MORPHOGENESIS_OF_A_NERVE	NA	NA	NA	NA	NA	NA	NA	NA	NA	NA	NA	NA	NA	NA	NA	NA	NA	NA	NA	NA	NA	NA	NA	NA	NA	NA	NA	NA	NA	NA	NA	NA	NA	NA	NA	NA	NA	NA	NA	NA	NA	NA	NA	NA	NA	NA	NA	NA	NA
GO_BRANCHING_MORPHOGENESIS_OF_AN_EPITHELIAL_TUBE	NA	NA	0.31156	0.0140156	NA	NA	NA	NA	NA	NA	NA	NA	NA	NA	NA	NA	NA	NA	NA	NA	NA	NA	NA	NA	NA	NA	NA	NA	NA	NA	NA	NA	NA	NA	NA	NA	NA	NA	NA	NA	NA	NA	NA	NA	NA	NA	NA	NA	NA
GO_BROWN_FAT_CELL_DIFFERENTIATION	NA	NA	NA	NA	NA	NA	NA	NA	NA	NA	NA	NA	NA	NA	NA	NA	NA	NA	NA	NA	NA	NA	0.00739655	0.306925	NA	NA	NA	NA	NA	NA	NA	NA	NA	NA	NA	NA	NA	NA	NA	NA	NA	NA	NA	NA	NA	NA	NA	NA	NA
GO_BRUSH_BORDER	NA	NA	NA	NA	NA	NA	NA	NA	NA	NA	NA	NA	NA	NA	NA	NA	NA	NA	NA	NA	NA	NA	NA	NA	NA	NA	NA	NA	NA	NA	NA	NA	NA	NA	NA	NA	NA	NA	NA	NA	0.0239039	0.217409	0.0374159	NA	NA	NA	NA	NA	NA
GO_BRUSH_BORDER_MEMBRANE	NA	NA	NA	NA	NA	NA	NA	NA	NA	NA	NA	NA	NA	NA	NA	NA	NA	NA	NA	NA	NA	NA	NA	NA	NA	NA	NA	NA	NA	NA	NA	NA	NA	NA	NA	NA	NA	NA	NA	NA	0.0121069	0.0578532	0.0314515	NA	NA	NA	NA	NA	NA
GO_BUTYRATE_COA_LIGASE_ACTIVITY	NA	NA	NA	NA	NA	NA	NA	NA	NA	NA	NA	NA	NA	NA	NA	NA	NA	NA	NA	NA	NA	NA	NA	NA	NA	NA	NA	NA	NA	NA	NA	NA	NA	NA	NA	NA	NA	NA	NA	NA	0.00976468	NA	NA	NA	NA	NA	NA	NA	NA
GO_C_ACYLTRANSFERASE_ACTIVITY	NA	NA	NA	NA	NA	NA	NA	NA	NA	NA	NA	NA	NA	NA	NA	NA	NA	NA	NA	NA	NA	NA	NA	NA	NA	NA	NA	NA	NA	NA	NA	NA	NA	NA	NA	NA	NA	NA	NA	NA	0.00337481	NA	NA	NA	NA	NA	NA	NA	NA
GO_C21_STEROID_HORMONE_BIOSYNTHETIC_PROCESS	NA	NA	NA	NA	NA	NA	NA	NA	NA	NA	NA	NA	NA	NA	NA	NA	NA	NA	NA	NA	NA	NA	NA	NA	NA	NA	NA	NA	NA	NA	NA	NA	NA	NA	NA	NA	NA	NA	NA	NA	NA	NA	NA	NA	NA	NA	NA	NA	0.0163617
GO_C21_STEROID_HORMONE_METABOLIC_PROCESS	NA	NA	NA	NA	NA	NA	NA	NA	NA	NA	NA	NA	NA	NA	NA	NA	NA	NA	NA	NA	NA	NA	NA	NA	NA	NA	NA	NA	NA	NA	NA	NA	NA	NA	NA	NA	NA	NA	NA	NA	NA	NA	NA	NA	NA	NA	NA	NA	0.0366699
GO_C2H2_ZINC_FINGER_DOMAIN_BINDING	NA	NA	NA	NA	NA	NA	NA	NA	NA	NA	NA	NA	NA	NA	0.0253324	NA	NA	NA	0.0322421	0.26239	NA	NA	0.00618886	NA	NA	NA	NA	NA	NA	NA	NA	NA	NA	NA	0.009756	NA	NA	NA	NA	NA	NA	NA	NA	NA	NA	NA	NA	NA	NA
GO_C4_DICARBOXYLATE_TRANSMEMBRANE_TRANSPORTER_ACTIVITY	NA	NA	NA	NA	NA	NA	NA	NA	0.0319903	NA	NA	NA	NA	NA	NA	NA	NA	NA	NA	0.0400757	NA	NA	NA	NA	NA	NA	NA	NA	NA	NA	NA	NA	NA	NA	NA	NA	NA	NA	NA	NA	NA	NA	NA	NA	NA	NA	NA	NA	NA
GO_C4_DICARBOXYLATE_TRANSPORT	NA	NA	NA	NA	NA	NA	NA	NA	NA	NA	NA	NA	NA	NA	NA	NA	NA	NA	NA	0.0133113	NA	NA	NA	NA	NA	NA	NA	NA	NA	NA	NA	NA	NA	NA	NA	NA	NA	NA	NA	NA	NA	NA	NA	NA	NA	NA	NA	NA	NA
GO_CADHERIN_BINDING	NA	NA	0.0605232	0.0034353	0.106115	0.00316478	NA	NA	NA	NA	NA	NA	NA	NA	NA	NA	NA	NA	0.0259458	0.0727032	NA	NA	NA	NA	NA	NA	0.97876	0.0140111	NA	NA	0.0165286	0.238532	NA	NA	0.431734	0.0270517	NA	NA	NA	NA	0.0332216	0.744252	0.00643135	0.480828	NA	NA	NA	NA	0.718218
GO_CADHERIN_BINDING_INVOLVED_IN_CELL_CELL_ADHESION	NA	NA	0.204527	0.0212647	NA	NA	NA	NA	NA	NA	NA	NA	NA	NA	NA	NA	NA	NA	NA	NA	NA	NA	NA	NA	NA	NA	NA	NA	0.00289298	NA	NA	NA	NA	NA	NA	NA	NA	NA	NA	NA	NA	NA	NA	NA	NA	NA	NA	NA	NA
GO_CAJAL_BODY	NA	NA	NA	NA	NA	NA	NA	NA	NA	NA	NA	NA	NA	NA	NA	NA	0.0321813	0.752898	0.000657142	0.0692206	NA	NA	NA	NA	NA	NA	NA	NA	0.0367152	NA	NA	NA	NA	NA	NA	NA	NA	NA	NA	NA	NA	NA	NA	NA	NA	NA	NA	NA	NA
GO_CALCIUM_CHANNEL_COMPLEX	NA	NA	NA	NA	NA	NA	0.0228305	NA	NA	NA	NA	NA	0.0886268	0.0207594	NA	NA	NA	NA	NA	NA	NA	NA	NA	NA	NA	NA	0.0414265	0.47196	NA	NA	NA	NA	NA	NA	NA	NA	NA	NA	NA	NA	NA	NA	NA	NA	NA	NA	NA	NA	NA
GO_CALCIUM_DEPENDENT_CYSTEINE_TYPE_ENDOPEPTIDASE_ACTIVITY	NA	NA	NA	NA	NA	NA	NA	NA	NA	NA	NA	NA	NA	NA	NA	NA	NA	NA	NA	NA	NA	NA	NA	NA	NA	NA	NA	NA	NA	NA	NA	NA	NA	NA	NA	NA	NA	NA	NA	NA	NA	NA	NA	NA	NA	NA	NA	NA	NA
GO_CALCIUM_DEPENDENT_PHOSPHOLIPASE_A2_ACTIVITY	NA	NA	NA	NA	NA	NA	NA	NA	NA	NA	NA	NA	NA	NA	NA	NA	NA	NA	NA	NA	NA	NA	NA	NA	NA	NA	NA	NA	NA	NA	NA	NA	NA	NA	NA	NA	NA	NA	NA	NA	NA	NA	NA	NA	0.0150393	NA	NA	NA	NA
GO_CALCIUM_DEPENDENT_PHOSPHOLIPID_BINDING	NA	NA	NA	NA	NA	NA	NA	NA	NA	NA	NA	NA	NA	NA	NA	NA	NA	NA	0.0193795	0.666043	NA	NA	NA	NA	NA	NA	NA	NA	NA	NA	NA	NA	NA	NA	NA	NA	NA	NA	NA	0.0342383	NA	NA	NA	NA	NA	NA	0.0136508	0.563508	NA
GO_CALCIUM_DEPENDENT_PROTEIN_KINASE_ACTIVITY	NA	NA	NA	NA	0.00286932	NA	NA	NA	NA	NA	0.0287081	NA	NA	NA	NA	0.0294543	NA	NA	NA	NA	0.0453387	NA	NA	NA	NA	NA	NA	NA	NA	NA	NA	NA	NA	NA	NA	NA	NA	NA	NA	NA	NA	NA	NA	NA	NA	NA	NA	NA	NA
GO_CALCIUM_IMPORT_INTO_THE_MITOCHONDRION	NA	NA	NA	NA	NA	NA	NA	NA	NA	NA	NA	NA	NA	NA	NA	NA	NA	NA	NA	NA	NA	NA	NA	NA	NA	NA	NA	NA	NA	NA	NA	NA	NA	NA	NA	NA	NA	NA	NA	NA	NA	NA	0.00853292	NA	NA	NA	NA	NA	NA
GO_CALCIUM_ION_TRANSMEMBRANE_IMPORT_INTO_CYTOSOL	NA	NA	NA	NA	NA	NA	0.025899	0.88653	NA	NA	NA	NA	0.142859	0.0228395	NA	NA	0.372617	0.040829	NA	NA	NA	NA	NA	NA	NA	NA	NA	NA	NA	NA	NA	NA	NA	NA	NA	NA	NA	NA	NA	NA	NA	NA	NA	NA	NA	0.039891	NA	NA	NA
GO_CALCIUM_ION_TRANSMEMBRANE_TRANSPORT	NA	NA	NA	NA	NA	NA	NA	NA	NA	NA	NA	NA	0.0977679	0.0103151	NA	NA	NA	NA	NA	NA	NA	NA	NA	NA	NA	NA	NA	NA	NA	NA	NA	NA	NA	NA	NA	NA	NA	NA	NA	NA	NA	NA	0.0329738	0.655719	NA	NA	NA	NA	NA
GO_CALCIUM_ION_TRANSMEMBRANE_TRANSPORT_VIA_HIGH_VOLTAGE_GATED_CALCIUM_CHANNEL	NA	NA	NA	NA	NA	NA	0.0333321	NA	NA	NA	NA	NA	NA	NA	NA	NA	NA	NA	NA	0.0497773	NA	NA	NA	NA	NA	NA	0.0176585	NA	NA	NA	NA	NA	NA	NA	NA	NA	NA	NA	NA	NA	NA	NA	NA	NA	NA	NA	NA	NA	0.00801199
GO_CALCIUM_ION_TRANSMEMBRANE_TRANSPORTER_ACTIVITY	NA	NA	NA	NA	NA	NA	NA	NA	NA	NA	NA	NA	0.123231	0.0188608	NA	NA	NA	NA	0.471204	0.0186442	NA	NA	NA	NA	NA	NA	NA	NA	NA	NA	NA	NA	NA	NA	NA	NA	NA	NA	NA	NA	NA	NA	NA	NA	NA	NA	NA	NA	NA
GO_CALCIUM_MEDIATED_SIGNALING	NA	NA	NA	NA	0.748584	0.0413657	NA	NA	NA	NA	NA	NA	NA	NA	NA	NA	NA	NA	NA	NA	NA	NA	0.530169	0.0235261	NA	NA	NA	NA	NA	NA	NA	NA	NA	NA	NA	NA	NA	NA	NA	NA	NA	NA	NA	NA	NA	NA	NA	NA	NA
GO_CALCIUM_MEDIATED_SIGNALING_USING_INTRACELLULAR_CALCIUM_SOURCE	NA	NA	NA	NA	NA	NA	NA	NA	NA	NA	NA	NA	NA	NA	NA	NA	NA	NA	NA	NA	NA	NA	NA	NA	NA	NA	NA	NA	NA	NA	NA	NA	NA	NA	NA	NA	NA	NA	NA	NA	NA	NA	NA	NA	NA	NA	NA	NA	NA
GO_CALCIUM_RELEASE_CHANNEL_ACTIVITY	NA	NA	NA	NA	NA	NA	NA	NA	NA	NA	NA	NA	0.0671745	0.0283615	0.249234	0.0152771	0.234313	0.0366047	NA	NA	NA	NA	NA	NA	NA	NA	NA	0.0110472	NA	NA	NA	NA	NA	NA	NA	NA	NA	NA	NA	NA	NA	NA	NA	NA	NA	NA	NA	NA	NA
GO_CALMODULIN_BINDING	NA	NA	NA	NA	0.431725	0.0024481	NA	NA	0.282747	0.00965476	NA	NA	0.0306892	0.204218	0.119537	0.0256654	0.378858	0.00101778	NA	NA	0.157277	0.0473502	NA	NA	NA	NA	NA	NA	NA	NA	NA	NA	NA	NA	NA	NA	NA	NA	0.0153397	0.292502	NA	NA	NA	NA	NA	NA	NA	NA	NA
GO_CALMODULIN_DEPENDENT_PROTEIN_KINASE_ACTIVITY	NA	NA	NA	NA	NA	NA	NA	NA	NA	NA	0.0382037	0.229523	NA	NA	0.376423	0.0037189	NA	NA	NA	NA	NA	NA	NA	NA	NA	NA	NA	NA	NA	NA	NA	NA	NA	NA	NA	NA	NA	NA	NA	NA	NA	NA	NA	NA	NA	NA	NA	NA	NA
GO_CALYX_OF_HELD	NA	NA	NA	NA	NA	NA	NA	NA	NA	NA	NA	NA	NA	NA	NA	NA	NA	NA	NA	NA	NA	NA	NA	NA	NA	NA	NA	NA	NA	NA	NA	NA	NA	NA	NA	NA	NA	NA	NA	NA	NA	NA	NA	NA	NA	NA	NA	NA	NA
GO_CAMERA_TYPE_EYE_DEVELOPMENT	NA	NA	NA	NA	NA	NA	NA	NA	NA	NA	0.307325	0.035351	NA	NA	NA	NA	0.00222481	0.248158	NA	NA	NA	NA	NA	NA	NA	NA	NA	NA	NA	NA	NA	NA	NA	NA	NA	NA	NA	NA	NA	NA	NA	NA	NA	NA	NA	NA	NA	NA	NA
GO_CAMERA_TYPE_EYE_MORPHOGENESIS	NA	NA	NA	NA	NA	NA	NA	NA	NA	NA	0.161382	0.00618587	NA	NA	NA	NA	0.0460554	0.389978	NA	NA	NA	NA	NA	NA	NA	NA	NA	NA	NA	NA	NA	NA	NA	NA	NA	NA	NA	NA	NA	NA	NA	NA	NA	NA	NA	NA	NA	NA	NA
GO_CAMP_BINDING	NA	NA	NA	NA	NA	NA	0.00575862	NA	NA	NA	NA	NA	NA	NA	NA	NA	NA	NA	NA	NA	NA	NA	NA	NA	NA	NA	NA	NA	NA	NA	NA	NA	NA	NA	NA	NA	NA	NA	NA	NA	NA	NA	NA	NA	NA	NA	NA	NA	NA
GO_CAMP_BIOSYNTHETIC_PROCESS	NA	NA	NA	NA	NA	NA	NA	NA	NA	NA	NA	NA	NA	NA	NA	NA	NA	NA	NA	NA	NA	NA	NA	NA	NA	NA	NA	NA	NA	NA	NA	NA	NA	NA	NA	NA	NA	NA	0.0466103	NA	NA	NA	NA	NA	NA	NA	NA	NA	NA
GO_CAMP_DEPENDENT_PROTEIN_KINASE_REGULATOR_ACTIVITY	NA	NA	NA	NA	NA	NA	NA	NA	NA	NA	NA	NA	0.00167247	NA	NA	NA	NA	NA	NA	NA	NA	NA	NA	NA	NA	NA	NA	NA	NA	NA	NA	NA	NA	NA	NA	NA	NA	NA	NA	NA	NA	NA	NA	NA	NA	NA	NA	NA	NA
GO_CAMP_METABOLIC_PROCESS	NA	NA	NA	NA	NA	NA	0.0482615	0.288886	NA	NA	NA	NA	NA	NA	NA	NA	NA	NA	NA	NA	NA	NA	NA	NA	NA	NA	NA	NA	NA	NA	NA	NA	NA	NA	NA	NA	NA	NA	NA	NA	NA	NA	NA	NA	NA	NA	NA	NA	NA
GO_CANONICAL_WNT_SIGNALING_PATHWAY	NA	NA	NA	NA	NA	NA	NA	NA	0.0404017	0.232729	NA	NA	NA	NA	NA	NA	0.900896	0.0432969	NA	NA	NA	NA	NA	NA	NA	NA	NA	NA	0.0098114	0.632948	NA	NA	NA	NA	NA	NA	NA	NA	NA	NA	NA	NA	0.109367	0.0308125	0.0201296	0.300189	0.362057	0.0151405	NA
GO_CARBOHYDRATE_BINDING	NA	NA	NA	NA	NA	NA	NA	NA	NA	NA	NA	NA	NA	NA	NA	NA	NA	NA	NA	NA	NA	NA	NA	NA	NA	NA	NA	NA	NA	NA	NA	NA	NA	NA	NA	NA	NA	NA	NA	NA	NA	NA	0.0403224	0.324144	0.0403224	0.285642	NA	NA	NA
GO_CARBOHYDRATE_BIOSYNTHETIC_PROCESS	NA	NA	NA	NA	NA	NA	NA	NA	NA	NA	NA	NA	NA	NA	NA	NA	0.42447	0.0052934	NA	NA	NA	NA	NA	NA	NA	NA	NA	NA	NA	NA	NA	NA	NA	NA	NA	NA	NA	NA	NA	NA	0.638657	0.0162642	NA	NA	NA	NA	NA	NA	NA
GO_CARBOHYDRATE_CATABOLIC_PROCESS	NA	NA	NA	NA	NA	NA	NA	NA	NA	NA	NA	NA	NA	NA	NA	NA	NA	NA	NA	NA	NA	NA	NA	NA	NA	NA	NA	NA	NA	NA	NA	NA	NA	NA	NA	NA	NA	NA	NA	0.0229613	0.815397	0.0115004	NA	NA	NA	NA	NA	NA	NA
GO_CARBOHYDRATE_DERIVATIVE_CATABOLIC_PROCESS	0.0244769	0.0929979	NA	NA	NA	NA	0.0135049	0.079494	NA	NA	0.0212024	0.538549	NA	NA	0.044927	0.37199	NA	NA	NA	NA	0.000479458	0.734521	NA	NA	NA	NA	0.382878	0.0375568	NA	NA	0.192703	0.013421	NA	NA	0.133425	0.028033	NA	NA	NA	NA	0.0306985	0.566266	NA	NA	0.902149	0.0156175	0.117078	0.00987739	NA
GO_CARBOHYDRATE_DERIVATIVE_TRANSMEMBRANE_TRANSPORTER_ACTIVITY	NA	NA	NA	NA	0.0369451	NA	NA	NA	NA	NA	NA	NA	NA	NA	NA	NA	NA	NA	0.0288607	0.710367	NA	0.00822825	NA	NA	NA	NA	NA	NA	NA	NA	NA	NA	NA	NA	0.023737	NA	NA	NA	NA	NA	NA	NA	NA	NA	NA	NA	NA	NA	NA
GO_CARBOHYDRATE_DERIVATIVE_TRANSPORT	0.0452547	0.407364	NA	NA	0.0266757	0.743448	NA	NA	NA	NA	NA	NA	NA	NA	NA	NA	0.0157994	0.505437	NA	NA	0.740897	0.0260987	0.0393155	0.150228	NA	NA	NA	NA	NA	NA	NA	NA	NA	NA	NA	NA	NA	NA	NA	NA	NA	NA	NA	NA	0.0255904	0.718177	NA	NA	NA
GO_CARBOHYDRATE_HOMEOSTASIS	NA	NA	NA	NA	NA	NA	0.760055	0.014151	NA	NA	NA	NA	NA	NA	NA	NA	NA	NA	NA	NA	NA	NA	0.0473148	0.538016	NA	NA	NA	NA	NA	NA	NA	NA	NA	NA	NA	NA	NA	NA	NA	NA	NA	NA	0.00922845	0.495382	NA	NA	NA	NA	NA
GO_CARBOHYDRATE_KINASE_ACTIVITY	NA	NA	NA	NA	NA	NA	NA	NA	NA	NA	NA	NA	NA	NA	NA	NA	NA	NA	NA	NA	NA	NA	NA	NA	NA	NA	NA	NA	NA	NA	NA	NA	NA	NA	NA	NA	NA	NA	NA	0.00563495	NA	0.039804	NA	NA	NA	NA	NA	NA	NA
GO_CARBOHYDRATE_PHOSPHATASE_ACTIVITY	NA	NA	NA	NA	NA	NA	NA	NA	NA	NA	NA	NA	NA	NA	NA	NA	0.0100188	NA	NA	NA	NA	NA	NA	NA	NA	NA	NA	NA	NA	NA	NA	NA	NA	NA	NA	NA	NA	NA	NA	NA	NA	NA	NA	NA	NA	NA	NA	NA	NA
GO_CARBOHYDRATE_PHOSPHORYLATION	NA	NA	NA	0.036513	0.251767	0.0459332	NA	NA	NA	NA	NA	NA	0.0217308	0.0536055	NA	NA	NA	NA	NA	NA	0.0453387	NA	NA	NA	NA	NA	NA	NA	NA	NA	NA	NA	NA	NA	NA	NA	NA	NA	NA	NA	NA	NA	NA	NA	NA	NA	NA	NA	NA
GO_CARBOHYDRATE_TRANSMEMBRANE_TRANSPORT	NA	NA	NA	NA	NA	NA	NA	NA	NA	NA	NA	NA	NA	NA	NA	NA	NA	NA	0.0254769	0.423477	NA	NA	NA	NA	NA	NA	NA	NA	NA	NA	NA	NA	NA	NA	NA	NA	NA	NA	NA	NA	NA	NA	NA	NA	NA	NA	NA	NA	NA
GO_CARBOHYDRATE_TRANSMEMBRANE_TRANSPORTER_ACTIVITY	NA	NA	NA	NA	NA	NA	NA	NA	NA	NA	NA	NA	NA	NA	NA	NA	NA	NA	NA	NA	NA	NA	NA	NA	NA	NA	NA	NA	NA	NA	NA	NA	NA	NA	NA	NA	NA	NA	NA	NA	NA	NA	NA	NA	NA	NA	NA	NA	NA
GO_CARBOHYDRATE_TRANSPORT	NA	NA	NA	NA	NA	NA	NA	NA	NA	NA	NA	NA	NA	NA	NA	NA	NA	NA	0.0257701	0.18775	NA	NA	NA	NA	0.946635	0.0494587	NA	NA	NA	NA	NA	NA	NA	NA	NA	NA	NA	NA	NA	NA	NA	NA	NA	NA	NA	NA	NA	NA	NA
GO_CARBON_CARBON_LYASE_ACTIVITY	NA	NA	NA	NA	0.460316	0.0366289	NA	NA	NA	NA	NA	NA	0.00902121	0.552617	NA	NA	NA	NA	NA	NA	NA	NA	NA	NA	NA	NA	NA	NA	0.00139764	NA	NA	NA	0.404233	0.0143741	NA	NA	NA	NA	NA	NA	NA	NA	NA	NA	NA	NA	NA	NA	NA
GO_CARBON_OXYGEN_LYASE_ACTIVITY	NA	NA	0.0143218	0.239887	NA	NA	NA	NA	0.0101513	0.296676	NA	NA	NA	NA	NA	NA	0.108647	0.0441205	NA	NA	NA	NA	NA	NA	NA	NA	NA	NA	NA	NA	NA	NA	NA	NA	NA	NA	NA	NA	NA	NA	NA	NA	NA	NA	NA	NA	NA	NA	NA
GO_CARBOXY_LYASE_ACTIVITY	NA	NA	NA	NA	NA	NA	NA	NA	NA	NA	NA	NA	0.0112439	NA	NA	NA	NA	NA	NA	NA	0.0133333	0.212015	NA	NA	NA	NA	NA	NA	0.00240696	NA	NA	NA	0.299021	0.0476021	NA	NA	NA	NA	NA	NA	NA	NA	NA	NA	NA	NA	NA	NA	NA
GO_CARBOXY_TERMINAL_DOMAIN_PROTEIN_KINASE_COMPLEX	NA	NA	NA	NA	NA	NA	NA	NA	NA	NA	NA	NA	0.00169559	NA	0.0474584	NA	NA	NA	0.00706158	0.346977	NA	NA	NA	NA	NA	NA	NA	NA	NA	NA	NA	0.0183949	NA	NA	0.191916	0.0143158	NA	NA	NA	NA	NA	NA	NA	NA	NA	NA	0.005268	NA	NA
GO_CARBOXYLIC_ESTER_HYDROLASE_ACTIVITY	NA	NA	NA	NA	NA	NA	NA	NA	NA	NA	NA	NA	NA	NA	NA	NA	NA	NA	NA	NA	NA	NA	NA	NA	NA	NA	NA	NA	NA	NA	NA	NA	NA	NA	NA	NA	NA	NA	NA	NA	NA	NA	NA	NA	0.0286083	NA	NA	NA	NA
GO_CARBOXYPEPTIDASE_ACTIVITY	NA	0.0236638	NA	NA	NA	NA	NA	NA	NA	NA	NA	NA	NA	NA	NA	NA	NA	NA	NA	NA	NA	NA	NA	NA	NA	NA	NA	NA	NA	NA	NA	NA	NA	NA	NA	NA	NA	NA	NA	NA	NA	NA	NA	NA	NA	NA	NA	NA	NA
GO_CARD_DOMAIN_BINDING	NA	NA	NA	NA	NA	NA	NA	NA	0.0319903	0.210988	NA	NA	NA	NA	NA	NA	NA	NA	NA	NA	NA	NA	NA	NA	NA	NA	NA	NA	NA	0.0100146	NA	NA	NA	NA	NA	NA	0.0093004	0.136225	NA	NA	NA	NA	NA	NA	NA	NA	NA	NA	NA
GO_CARDIAC_ATRIUM_DEVELOPMENT	NA	NA	NA	NA	NA	NA	NA	NA	NA	NA	NA	NA	NA	NA	NA	NA	NA	NA	NA	NA	NA	NA	NA	NA	NA	NA	NA	NA	NA	NA	NA	NA	NA	NA	NA	NA	0.0433189	NA	NA	NA	NA	NA	NA	NA	NA	NA	NA	NA	NA
GO_CARDIAC_CELL_DEVELOPMENT	NA	NA	NA	NA	0.659519	0.0391268	NA	NA	NA	NA	NA	NA	NA	NA	NA	0.0179852	NA	NA	NA	NA	NA	NA	NA	NA	NA	NA	NA	NA	NA	NA	NA	NA	NA	NA	NA	NA	0.0490935	0.557864	NA	NA	NA	NA	NA	NA	NA	NA	NA	NA	0.0299368
GO_CARDIAC_CHAMBER_DEVELOPMENT	NA	NA	NA	NA	NA	NA	NA	NA	NA	NA	NA	NA	NA	NA	NA	NA	NA	NA	NA	NA	NA	NA	NA	NA	NA	NA	NA	NA	NA	NA	NA	NA	NA	NA	NA	NA	NA	NA	NA	NA	NA	NA	NA	NA	NA	NA	NA	NA	NA
GO_CARDIAC_CHAMBER_MORPHOGENESIS	NA	NA	NA	NA	NA	NA	NA	NA	NA	NA	NA	NA	NA	NA	NA	NA	NA	NA	NA	NA	NA	NA	NA	NA	NA	NA	NA	NA	NA	NA	NA	NA	NA	NA	NA	NA	NA	NA	NA	NA	NA	NA	NA	NA	NA	NA	NA	NA	NA
GO_CARDIAC_CONDUCTION	NA	NA	NA	NA	NA	NA	NA	NA	NA	NA	NA	NA	NA	NA	NA	NA	NA	NA	NA	NA	NA	NA	NA	NA	NA	NA	NA	NA	NA	NA	NA	NA	NA	NA	NA	NA	NA	NA	NA	NA	NA	NA	NA	NA	NA	NA	NA	NA	NA
GO_CARDIAC_EPITHELIAL_TO_MESENCHYMAL_TRANSITION	NA	NA	NA	NA	NA	NA	NA	NA	NA	NA	NA	NA	NA	NA	NA	NA	NA	NA	NA	NA	NA	NA	NA	NA	NA	NA	NA	NA	NA	NA	0.0536875	0.0404565	NA	NA	NA	NA	0.0349262	NA	NA	NA	NA	NA	NA	NA	NA	NA	NA	NA	NA
GO_CARDIAC_MUSCLE_CELL_ACTION_POTENTIAL	NA	NA	NA	NA	NA	NA	NA	NA	NA	NA	0.566895	0.0324635	NA	NA	0.00841094	0.0523309	NA	NA	NA	NA	0.28918	0.00168999	NA	NA	NA	NA	NA	NA	0.344879	0.0352781	NA	NA	0.533316	0.0392212	NA	NA	0.00508756	NA	NA	NA	NA	NA	NA	NA	NA	NA	NA	NA	NA
GO_CARDIAC_MUSCLE_CELL_ACTION_POTENTIAL_INVOLVED_IN_CONTRACTION	NA	NA	NA	NA	NA	NA	NA	NA	NA	NA	NA	NA	NA	NA	0.0142329	0.130583	NA	NA	NA	NA	NA	NA	NA	NA	NA	NA	NA	NA	0.230808	0.0165068	NA	NA	NA	NA	NA	NA	0.0017597	NA	NA	NA	NA	NA	NA	NA	NA	NA	NA	NA	NA
GO_CARDIAC_MUSCLE_CELL_CONTRACTION	NA	NA	NA	NA	NA	NA	NA	NA	NA	NA	NA	NA	NA	NA	0.0353892	0.201894	NA	NA	NA	NA	0.283906	0.0139089	NA	NA	NA	NA	NA	NA	0.338957	0.0340999	NA	NA	NA	NA	NA	NA	0.00485049	NA	NA	NA	NA	NA	NA	NA	NA	NA	NA	NA	NA
GO_CARDIAC_MUSCLE_CELL_DIFFERENTIATION	NA	NA	NA	NA	NA	NA	NA	NA	NA	NA	NA	NA	NA	NA	NA	NA	NA	NA	NA	NA	NA	NA	NA	NA	NA	NA	NA	NA	NA	NA	0.183322	0.0376968	NA	NA	NA	0.0248117	NA	NA	NA	NA	NA	NA	NA	NA	NA	NA	NA	NA	0.0153874
GO_CARDIAC_MUSCLE_CELL_MEMBRANE_REPOLARIZATION	NA	NA	NA	NA	NA	NA	NA	NA	NA	NA	NA	NA	NA	NA	0.0308983	0.370906	NA	NA	NA	NA	0.444699	0.00268858	0.0422495	NA	NA	NA	NA	NA	NA	NA	NA	NA	NA	NA	NA	NA	0.00054007	NA	NA	NA	NA	NA	NA	NA	NA	NA	NA	NA	NA
GO_CARDIAC_MUSCLE_CELL_PROLIFERATION	NA	NA	NA	NA	NA	NA	NA	NA	NA	NA	NA	NA	NA	NA	NA	NA	NA	NA	NA	NA	NA	NA	NA	NA	NA	NA	NA	NA	NA	NA	NA	NA	NA	NA	NA	0.0225979	NA	NA	NA	NA	NA	NA	NA	NA	NA	NA	NA	NA	NA
GO_CARDIAC_MUSCLE_CONTRACTION	NA	NA	NA	NA	NA	NA	NA	NA	NA	NA	NA	NA	NA	NA	NA	NA	NA	NA	NA	NA	NA	NA	NA	NA	NA	NA	NA	NA	NA	NA	NA	NA	NA	NA	NA	NA	0.0019029	NA	NA	NA	NA	NA	NA	NA	0.0852807	0.039891	NA	NA	NA
GO_CARDIAC_MUSCLE_FIBER_DEVELOPMENT	NA	NA	NA	NA	NA	NA	NA	NA	NA	NA	NA	NA	NA	NA	NA	NA	NA	NA	NA	NA	NA	NA	NA	NA	NA	NA	NA	NA	NA	NA	NA	NA	NA	NA	NA	NA	0.00361645	NA	0.0466103	0.0525435	NA	NA	NA	NA	NA	NA	NA	NA	NA
GO_CARDIAC_MUSCLE_TISSUE_DEVELOPMENT	NA	NA	0.0277385	0.560477	NA	NA	NA	NA	NA	NA	NA	NA	NA	NA	NA	NA	NA	NA	NA	NA	NA	NA	NA	NA	NA	NA	NA	NA	NA	NA	0.508769	0.0287608	NA	NA	NA	0.0161679	NA	NA	NA	NA	NA	NA	NA	NA	NA	NA	0.0460427	0.275971	0.00828682
GO_CARDIAC_MYOFIBRIL_ASSEMBLY	NA	NA	NA	NA	NA	NA	NA	NA	NA	NA	NA	NA	NA	NA	NA	0.0189288	NA	NA	NA	NA	NA	NA	NA	NA	NA	NA	NA	NA	NA	NA	NA	NA	0.0154742	NA	NA	NA	NA	NA	NA	NA	NA	NA	NA	NA	NA	NA	NA	NA	NA
GO_CARDIAC_RIGHT_VENTRICLE_MORPHOGENESIS	NA	NA	NA	NA	NA	NA	NA	NA	NA	NA	NA	NA	NA	NA	NA	NA	NA	NA	NA	NA	NA	NA	NA	NA	NA	NA	NA	NA	NA	NA	0.0225251	NA	NA	NA	NA	NA	NA	NA	NA	NA	NA	NA	NA	NA	NA	NA	NA	NA	NA
GO_CARDIAC_SEPTUM_DEVELOPMENT	NA	NA	NA	NA	NA	NA	NA	NA	NA	NA	NA	NA	NA	NA	NA	NA	NA	NA	NA	NA	NA	NA	NA	NA	NA	NA	0.0419878	0.663069	NA	NA	NA	NA	NA	NA	NA	NA	NA	NA	NA	NA	NA	NA	NA	NA	NA	NA	NA	NA	NA
GO_CARDIAC_SEPTUM_MORPHOGENESIS	NA	NA	NA	NA	NA	NA	NA	NA	NA	NA	NA	NA	NA	NA	NA	NA	NA	NA	NA	NA	NA	NA	NA	NA	NA	NA	NA	NA	NA	NA	NA	NA	NA	NA	NA	NA	NA	NA	NA	NA	NA	NA	NA	NA	NA	NA	NA	NA	NA
GO_CARDIAC_VENTRICLE_MORPHOGENESIS	NA	NA	NA	NA	NA	NA	NA	NA	0.0408348	NA	NA	NA	NA	NA	NA	NA	NA	NA	NA	NA	NA	NA	NA	NA	NA	NA	NA	NA	NA	NA	NA	NA	NA	NA	NA	NA	NA	NA	NA	NA	NA	NA	NA	NA	NA	NA	NA	NA	NA
GO_CARDIOBLAST_PROLIFERATION	NA	NA	NA	NA	NA	NA	NA	NA	NA	NA	NA	NA	NA	NA	NA	NA	NA	NA	NA	NA	NA	NA	NA	NA	NA	NA	NA	NA	NA	NA	NA	NA	NA	NA	NA	NA	NA	NA	NA	NA	NA	NA	NA	NA	NA	NA	NA	NA	NA
GO_CARDIOCYTE_DIFFERENTIATION	NA	NA	NA	NA	NA	NA	NA	NA	NA	NA	NA	NA	NA	NA	NA	NA	NA	NA	NA	NA	NA	NA	NA	NA	NA	NA	NA	NA	NA	NA	NA	NA	NA	NA	NA	NA	NA	NA	NA	NA	NA	NA	NA	NA	NA	NA	NA	NA	0.00702713
GO_CARDIOLIPIN_BINDING	NA	NA	NA	NA	NA	NA	NA	NA	NA	NA	NA	NA	0.0299857	0.159118	NA	NA	NA	NA	NA	NA	NA	NA	NA	NA	NA	NA	NA	NA	NA	NA	NA	NA	NA	NA	NA	NA	NA	NA	NA	NA	NA	NA	0.00716641	NA	NA	NA	NA	NA	NA
GO_CARDIOLIPIN_METABOLIC_PROCESS	NA	NA	NA	NA	NA	NA	NA	NA	NA	NA	NA	NA	0.368481	0.0315828	0.261793	0.017061	0.24625	0.0407011	NA	NA	NA	NA	NA	NA	NA	NA	0.0176585	0.157466	NA	NA	NA	NA	NA	NA	NA	NA	NA	0.011466	NA	NA	0.0306276	0.240521	0.0188801	0.177063	NA	NA	NA	NA	NA
GO_CARGO_ADAPTOR_ACTIVITY	NA	NA	NA	NA	NA	NA	NA	NA	NA	NA	NA	NA	NA	NA	NA	NA	NA	0.0366047	NA	NA	NA	NA	NA	NA	NA	NA	NA	NA	NA	NA	NA	NA	NA	NA	NA	NA	NA	NA	NA	NA	0.0274991	NA	NA	NA	NA	NA	NA	NA	NA
GO_CARGO_RECEPTOR_ACTIVITY	NA	NA	NA	NA	NA	NA	NA	NA	NA	NA	NA	NA	NA	NA	NA	NA	NA	NA	NA	NA	NA	NA	NA	NA	NA	NA	NA	NA	NA	NA	NA	NA	NA	NA	NA	NA	NA	NA	NA	NA	NA	NA	NA	NA	NA	NA	NA	NA	NA
GO_CARNITINE_SHUTTLE	NA	NA	NA	NA	NA	NA	NA	NA	NA	NA	NA	NA	0.0299857	NA	NA	NA	NA	NA	NA	NA	NA	NA	NA	NA	0.0179369	NA	NA	NA	NA	NA	NA	NA	NA	NA	NA	NA	NA	NA	NA	NA	NA	NA	NA	NA	NA	NA	NA	NA	NA
GO_CARTILAGE_DEVELOPMENT_INVOLVED_IN_ENDOCHONDRAL_BONE_MORPHOGENESIS	NA	NA	NA	NA	NA	NA	NA	NA	NA	NA	NA	NA	NA	NA	NA	NA	NA	NA	NA	NA	NA	NA	0.0222521	0.191457	NA	NA	NA	NA	NA	NA	NA	NA	NA	NA	0.254967	0.0264461	NA	NA	NA	NA	NA	NA	NA	NA	NA	NA	NA	NA	NA
GO_CASPASE_BINDING	NA	NA	NA	NA	NA	NA	NA	NA	0.0184327	NA	NA	NA	NA	NA	NA	NA	NA	NA	NA	NA	NA	NA	NA	NA	NA	NA	NA	NA	NA	NA	NA	NA	NA	NA	NA	NA	NA	NA	NA	NA	NA	NA	NA	NA	NA	NA	NA	NA	NA
GO_CATALYTIC_ACTIVITY_ACTING_ON_A_RRNA	NA	NA	NA	NA	NA	NA	NA	NA	NA	NA	NA	NA	NA	NA	NA	0.0294543	NA	0.000817041	NA	NA	NA	NA	NA	NA	NA	NA	NA	NA	NA	NA	NA	NA	NA	NA	NA	NA	NA	0.0199596	0.00577987	0.12154	NA	NA	NA	NA	NA	NA	NA	NA	NA
GO_CATALYTIC_ACTIVITY_ACTING_ON_A_TRNA	0.0204189	0.148573	0.0706427	0.0199991	NA	NA	0.591426	0.0414566	NA	NA	NA	NA	0.036244	0.856804	0.612117	0.0126556	0.12593	0.00681652	NA	NA	0.00191266	0.202993	NA	NA	NA	NA	0.0136044	0.325064	NA	NA	NA	NA	NA	NA	NA	NA	NA	NA	NA	NA	0.121572	0.0111993	NA	NA	NA	NA	0.00530516	0.118348	NA
GO_CATALYTIC_ACTIVITY_ACTING_ON_DNA	NA	NA	0.477143	0.0152018	0.0368834	0.0739708	NA	NA	0.00361087	0.0811498	NA	NA	NA	NA	NA	NA	NA	NA	NA	NA	NA	NA	0.0238722	0.0625161	0.0431812	0.116294	NA	NA	0.0019153	0.310432	NA	NA	NA	NA	NA	NA	NA	NA	NA	NA	NA	NA	0.011045	0.17809	NA	NA	NA	NA	NA
GO_CATALYTIC_ACTIVITY_ACTING_ON_RNA	NA	NA	0.537333	0.00373846	NA	NA	0.425664	0.00266211	0.0429777	0.33795	0.0109393	0.285842	NA	NA	0.625339	0.000432395	0.556639	0.00429905	0.0072764	0.247358	0.0496028	0.738655	NA	NA	NA	NA	NA	NA	NA	NA	0.166171	0.0399543	NA	NA	NA	NA	NA	NA	0.00242102	0.34301	NA	NA	0.040564	0.399652	NA	NA	0.00277294	0.699982	NA
GO_CATALYTIC_STEP_1_SPLICEOSOME	NA	NA	NA	NA	NA	NA	NA	NA	NA	0.0128885	NA	NA	NA	NA	NA	NA	NA	NA	NA	NA	NA	NA	NA	NA	NA	NA	NA	NA	NA	NA	NA	NA	NA	NA	NA	NA	NA	NA	NA	NA	NA	NA	NA	NA	NA	NA	NA	NA	NA
GO_CATALYTIC_STEP_2_SPLICEOSOME	NA	NA	0.000819892	0.0977035	NA	NA	0.0132116	0.149933	NA	NA	NA	NA	NA	NA	1.89748e-06	0.25567	NA	NA	NA	NA	NA	NA	NA	NA	NA	NA	0.262346	0.00941037	0.0137222	NA	NA	NA	0.0018808	0.215789	0.0116752	0.176624	0.191187	0.0451544	0.00829562	NA	NA	NA	0.00375932	0.240668	NA	NA	NA	NA	NA
GO_CATION_CATION_ANTIPORTER_ACTIVITY	NA	NA	NA	NA	NA	NA	NA	NA	NA	NA	NA	NA	NA	NA	NA	NA	NA	NA	NA	NA	NA	NA	NA	0.0153192	NA	NA	NA	NA	NA	NA	NA	NA	NA	NA	NA	NA	NA	NA	NA	NA	NA	NA	NA	NA	NA	NA	NA	NA	NA
GO_CATION_CHANNEL_ACTIVITY	NA	NA	NA	NA	NA	NA	NA	NA	NA	NA	NA	NA	NA	NA	NA	NA	NA	NA	NA	NA	NA	NA	NA	NA	NA	NA	NA	NA	NA	NA	NA	NA	NA	NA	NA	NA	NA	NA	NA	NA	NA	NA	NA	NA	NA	NA	NA	NA	NA
GO_CATION_CHLORIDE_SYMPORTER_ACTIVITY	NA	NA	NA	NA	NA	NA	NA	NA	NA	NA	NA	NA	NA	NA	NA	NA	NA	NA	NA	0.00442986	NA	NA	NA	NA	NA	NA	NA	NA	NA	NA	NA	NA	NA	NA	NA	NA	NA	NA	NA	NA	NA	NA	NA	NA	NA	NA	0.0335765	NA	0.00715701
GO_CAVEOLA	NA	NA	NA	NA	NA	NA	NA	NA	NA	NA	NA	NA	NA	NA	NA	NA	0.0406945	0.440775	NA	NA	NA	NA	NA	NA	NA	NA	NA	NA	NA	NA	NA	NA	NA	NA	NA	NA	NA	NA	NA	NA	NA	NA	NA	NA	NA	NA	NA	NA	NA
GO_CCR4_NOT_COMPLEX	NA	NA	NA	NA	NA	NA	NA	NA	NA	NA	NA	NA	NA	NA	NA	NA	NA	NA	NA	NA	NA	NA	NA	NA	0.0367543	NA	NA	NA	NA	NA	NA	NA	NA	NA	NA	NA	NA	NA	NA	NA	0.0245089	NA	NA	NA	NA	NA	NA	NA	NA
GO_CD4_POSITIVE_ALPHA_BETA_T_CELL_ACTIVATION	NA	NA	NA	NA	NA	NA	NA	NA	NA	NA	NA	NA	NA	NA	NA	NA	NA	NA	NA	NA	NA	NA	NA	NA	NA	NA	NA	NA	NA	NA	NA	NA	NA	0.0162606	NA	NA	NA	NA	NA	NA	NA	NA	NA	0.0207816	NA	NA	NA	NA	NA
GO_CD4_POSITIVE_ALPHA_BETA_T_CELL_DIFFERENTIATION	NA	NA	NA	NA	NA	NA	NA	NA	NA	NA	NA	NA	NA	NA	NA	NA	NA	NA	NA	NA	NA	NA	NA	NA	NA	NA	NA	NA	NA	NA	NA	NA	NA	NA	NA	NA	NA	NA	NA	NA	NA	NA	NA	NA	NA	NA	NA	NA	NA
GO_CD4_POSITIVE_ALPHA_BETA_T_CELL_PROLIFERATION	NA	NA	NA	NA	NA	NA	NA	NA	NA	NA	NA	NA	NA	NA	NA	NA	NA	NA	NA	NA	NA	NA	NA	NA	NA	NA	NA	NA	0.0155985	0.109047	NA	NA	NA	0.00613162	NA	NA	NA	NA	NA	NA	NA	NA	NA	NA	NA	NA	NA	NA	NA
GO_CD4_POSITIVE_OR_CD8_POSITIVE_ALPHA_BETA_T_CELL_LINEAGE_COMMITMENT	NA	NA	NA	NA	NA	NA	NA	NA	NA	NA	NA	NA	NA	NA	NA	NA	NA	NA	NA	NA	NA	NA	NA	NA	NA	NA	NA	NA	NA	NA	NA	NA	NA	NA	NA	NA	NA	NA	NA	NA	NA	NA	NA	NA	NA	0.0344105	NA	NA	NA
GO_CD40_SIGNALING_PATHWAY	NA	NA	NA	NA	NA	NA	NA	NA	NA	NA	NA	NA	NA	NA	NA	NA	NA	NA	NA	NA	NA	NA	NA	NA	NA	NA	NA	NA	NA	NA	NA	NA	NA	NA	NA	NA	NA	NA	0.0022609	NA	NA	NA	NA	NA	NA	NA	NA	NA	NA
GO_CD8_POSITIVE_ALPHA_BETA_T_CELL_ACTIVATION	NA	NA	NA	NA	NA	NA	NA	NA	NA	NA	NA	NA	NA	NA	NA	NA	NA	NA	NA	NA	NA	NA	NA	NA	NA	NA	NA	NA	NA	NA	NA	NA	NA	NA	NA	NA	NA	NA	NA	NA	NA	NA	NA	0.0339228	NA	NA	NA	NA	NA
GO_CDP_DIACYLGLYCEROL_METABOLIC_PROCESS	NA	NA	NA	NA	NA	NA	NA	NA	NA	NA	NA	NA	NA	NA	NA	NA	NA	NA	NA	NA	NA	NA	NA	NA	NA	NA	NA	0.000281571	NA	NA	NA	NA	NA	NA	NA	NA	NA	NA	NA	NA	NA	NA	NA	NA	NA	0.0145352	NA	NA	NA
GO_CELL_ADHESION_MEDIATED_BY_INTEGRIN	NA	NA	NA	NA	NA	NA	NA	NA	NA	NA	NA	NA	0.837244	0.0250834	NA	NA	NA	NA	NA	NA	NA	NA	NA	NA	NA	NA	NA	NA	NA	NA	0.566881	0.0341613	NA	NA	NA	0.00347843	NA	NA	NA	NA	NA	NA	NA	NA	NA	NA	NA	NA	NA
GO_CELL_ADHESION_MEDIATOR_ACTIVITY	NA	NA	NA	NA	NA	NA	NA	NA	NA	NA	NA	NA	NA	NA	NA	NA	NA	NA	NA	NA	NA	NA	NA	NA	NA	NA	NA	NA	0.016351	NA	0.00532395	0.120767	NA	NA	NA	NA	NA	NA	NA	NA	NA	NA	NA	NA	0.511464	0.0084321	NA	NA	NA
GO_CELL_AGING	NA	NA	NA	NA	NA	NA	NA	NA	NA	NA	NA	NA	0.0100605	0.552822	NA	NA	NA	NA	NA	NA	NA	NA	NA	NA	0.00765974	NA	0.0466459	0.307664	NA	NA	NA	NA	NA	NA	NA	NA	NA	NA	NA	NA	0.0356655	0.10488	NA	NA	0.00283807	0.468901	NA	NA	NA
GO_CELL_CELL_ADHESION_INVOLVED_IN_GASTRULATION	NA	NA	NA	NA	NA	NA	NA	NA	NA	NA	NA	NA	NA	NA	0.0164558	NA	0.014396	NA	NA	NA	NA	NA	NA	NA	NA	NA	NA	NA	NA	NA	NA	NA	NA	NA	NA	NA	NA	NA	NA	NA	0.0140346	NA	NA	NA	NA	NA	NA	NA	NA
GO_CELL_CELL_ADHESION_MEDIATED_BY_CADHERIN	NA	NA	0.0483973	0.29955	NA	NA	NA	NA	NA	NA	NA	NA	NA	NA	NA	NA	NA	NA	NA	NA	NA	NA	NA	NA	NA	NA	NA	NA	NA	NA	0.280798	0.0316394	NA	NA	NA	NA	NA	NA	NA	NA	NA	NA	NA	NA	NA	NA	NA	NA	NA
GO_CELL_CELL_ADHESION_MEDIATED_BY_INTEGRIN	NA	NA	NA	NA	NA	NA	NA	NA	0.00313308	NA	NA	NA	NA	NA	NA	NA	NA	NA	NA	NA	NA	NA	NA	NA	NA	NA	NA	NA	NA	NA	NA	NA	NA	NA	NA	1.22916e-05	NA	NA	NA	NA	NA	NA	0.0169128	NA	NA	NA	NA	NA	NA
GO_CELL_CELL_CONTACT_ZONE	NA	NA	NA	NA	NA	NA	NA	NA	NA	NA	0.0489508	0.150032	NA	NA	0.0353892	0.201894	0.320705	0.0441205	NA	NA	NA	NA	0.00289539	NA	NA	NA	NA	NA	NA	NA	NA	NA	NA	NA	NA	NA	0.148706	0.0300539	NA	NA	NA	NA	NA	NA	NA	NA	NA	NA	NA
GO_CELL_CELL_JUNCTION	NA	NA	0.00157242	0.593336	NA	NA	NA	NA	NA	NA	0.00907655	0.0885051	0.182512	0.00490471	0.441601	0.00141743	NA	NA	NA	NA	NA	NA	0.0174567	0.701417	NA	NA	NA	NA	0.000482027	0.19491	0.221306	0.0266992	NA	NA	NA	NA	NA	NA	0.684461	0.00515306	NA	NA	NA	NA	NA	NA	0.00516896	0.22003	NA
GO_CELL_CELL_JUNCTION_ASSEMBLY	NA	NA	NA	NA	NA	NA	NA	NA	NA	NA	NA	NA	NA	NA	NA	NA	NA	NA	NA	NA	NA	NA	0.00650156	NA	NA	NA	NA	NA	0.0103203	0.411866	NA	NA	NA	NA	NA	NA	NA	NA	NA	NA	NA	NA	NA	NA	NA	NA	NA	NA	NA
GO_CELL_CELL_JUNCTION_MAINTENANCE	NA	NA	NA	NA	NA	NA	NA	NA	NA	NA	NA	NA	NA	NA	NA	NA	0.00119894	NA	NA	NA	NA	NA	NA	NA	NA	NA	NA	NA	NA	NA	NA	NA	NA	NA	NA	NA	NA	NA	NA	NA	NA	NA	NA	NA	NA	NA	NA	NA	NA
GO_CELL_CELL_JUNCTION_ORGANIZATION	0.832793	0.0293943	0.0175446	0.931642	NA	NA	NA	NA	NA	NA	NA	NA	NA	NA	NA	NA	NA	NA	NA	NA	NA	NA	0.0266217	NA	NA	NA	NA	NA	0.00756599	0.326135	NA	NA	NA	NA	NA	NA	NA	NA	NA	NA	NA	NA	NA	NA	NA	NA	0.291849	0.0420943	NA
GO_CELL_CELL_SIGNALING_INVOLVED_IN_CARDIAC_CONDUCTION	NA	NA	NA	NA	NA	NA	NA	NA	NA	NA	NA	NA	NA	NA	NA	NA	NA	NA	NA	NA	0.368092	0.0198065	NA	NA	NA	NA	NA	NA	NA	NA	NA	NA	NA	NA	NA	NA	0.00313156	NA	NA	NA	NA	NA	NA	NA	NA	NA	NA	NA	NA
GO_CELL_COMMUNICATION_BY_ELECTRICAL_COUPLING	NA	NA	NA	NA	NA	NA	NA	NA	NA	NA	0.0459976	NA	NA	NA	0.407216	0.0471603	NA	NA	NA	NA	NA	NA	NA	NA	NA	NA	NA	NA	NA	NA	NA	NA	NA	NA	NA	NA	NA	NA	NA	NA	NA	NA	NA	NA	NA	NA	NA	NA	NA
GO_CELL_COMMUNICATION_BY_ELECTRICAL_COUPLING_INVOLVED_IN_CARDIAC_CONDUCTION	NA	NA	NA	NA	NA	NA	NA	NA	NA	NA	NA	NA	NA	NA	NA	NA	NA	NA	NA	NA	NA	NA	NA	NA	NA	NA	NA	NA	NA	NA	NA	NA	NA	NA	NA	NA	NA	NA	NA	NA	NA	NA	NA	NA	NA	NA	NA	NA	NA
GO_CELL_COMMUNICATION_INVOLVED_IN_CARDIAC_CONDUCTION	NA	NA	NA	NA	NA	NA	NA	NA	NA	NA	NA	NA	NA	NA	NA	NA	NA	NA	NA	NA	NA	NA	NA	NA	NA	NA	NA	NA	NA	NA	NA	NA	NA	NA	NA	NA	0.014903	NA	NA	NA	NA	NA	NA	NA	NA	NA	NA	NA	NA
GO_CELL_CORTEX	NA	NA	0.900182	0.000525915	0.712003	0.00157546	0.0264561	0.190858	0.176691	0.0151499	0.0206685	0.53896	NA	NA	0.071389	0.00243359	0.199568	0.000437069	0.12985	0.00135665	0.0310894	0.153268	NA	NA	NA	NA	NA	NA	NA	NA	NA	NA	0.0355256	0.190395	0.370356	0.0180072	NA	NA	0.427562	0.024579	NA	NA	0.295225	0.0177577	NA	NA	0.269258	0.0188076	NA
GO_CELL_CORTEX_REGION	NA	NA	NA	NA	NA	0.00301322	NA	NA	NA	NA	NA	NA	0.00392774	0.139714	0.0328751	0.0806632	0.483166	0.00668163	NA	NA	NA	NA	NA	NA	NA	NA	NA	NA	NA	NA	NA	NA	NA	NA	NA	NA	NA	NA	0.181792	0.0214735	NA	NA	NA	NA	NA	NA	NA	0.00372832	NA
GO_CELL_CYCLE_ARREST	0.0484801	0.729409	0.0769123	0.00299967	NA	NA	0.0361549	0.700502	0.401503	0.00795692	NA	NA	NA	NA	0.0985913	0.0050554	0.496129	0.0259547	0.28808	0.0202444	0.000551454	0.798374	0.0112603	0.511153	0.00192365	0.631369	0.279758	0.00702821	NA	NA	NA	NA	0.0317025	0.414714	0.0097883	0.609291	NA	NA	NA	NA	NA	NA	NA	NA	NA	NA	NA	NA	0.0326072
GO_CELL_CYCLE_CHECKPOINT	NA	NA	0.766608	0.00681583	NA	NA	0.000877958	0.65719	NA	NA	NA	NA	NA	NA	NA	NA	NA	NA	0.790257	0.0332739	0.0376513	0.776446	0.000379059	0.215102	5.30448e-06	0.321805	NA	NA	NA	NA	0.254445	0.0229114	0.180883	0.00656393	NA	NA	NA	NA	NA	NA	NA	NA	NA	NA	NA	NA	0.518663	0.0192325	NA
GO_CELL_CYCLE_G1_S_PHASE_TRANSITION	NA	NA	0.199164	0.000167137	0.170382	0.014337	NA	NA	NA	NA	NA	NA	NA	NA	NA	NA	NA	NA	NA	NA	0.0136909	0.0601021	0.0122681	0.394619	NA	NA	0.281879	0.00285947	NA	NA	0.880297	1.50256e-05	NA	NA	NA	NA	NA	NA	NA	NA	NA	NA	NA	NA	NA	NA	NA	NA	NA
GO_CELL_CYCLE_G2_M_PHASE_TRANSITION	NA	NA	NA	NA	NA	NA	0.00488579	0.0608082	NA	NA	NA	NA	NA	NA	NA	NA	NA	NA	0.59701	0.0497249	0.194698	0.010835	NA	NA	1.59504e-08	0.104645	NA	NA	0.0349867	0.486762	NA	NA	0.764834	0.0200845	NA	NA	NA	NA	NA	NA	NA	NA	NA	NA	0.0164294	0.496114	NA	NA	NA
GO_CELL_DEATH_IN_RESPONSE_TO_HYDROGEN_PEROXIDE	NA	NA	NA	NA	NA	NA	NA	0.0151284	NA	NA	NA	NA	NA	NA	NA	NA	NA	NA	NA	NA	NA	NA	NA	NA	NA	NA	NA	NA	NA	NA	NA	NA	NA	0.0451719	0.0460157	0.258366	NA	NA	NA	NA	NA	NA	NA	NA	NA	NA	NA	NA	NA
GO_CELL_DEATH_IN_RESPONSE_TO_OXIDATIVE_STRESS	NA	NA	NA	NA	0.0294889	NA	0.793548	0.0038473	NA	NA	NA	NA	NA	NA	NA	NA	NA	NA	NA	NA	NA	NA	NA	NA	NA	NA	NA	NA	NA	NA	NA	NA	NA	NA	NA	NA	NA	NA	NA	NA	NA	NA	NA	NA	0.686265	0.0410414	NA	NA	NA
GO_CELL_DIFFERENTIATION_IN_SPINAL_CORD	NA	NA	NA	NA	NA	NA	NA	NA	NA	NA	NA	NA	NA	NA	NA	NA	NA	NA	NA	NA	NA	NA	NA	NA	0.668302	0.0151651	NA	NA	NA	NA	NA	NA	NA	NA	NA	NA	NA	NA	NA	NA	NA	NA	NA	NA	NA	NA	NA	NA	NA
GO_CELL_DIFFERENTIATION_INVOLVED_IN_EMBRYONIC_PLACENTA_DEVELOPMENT	NA	NA	NA	NA	NA	NA	NA	NA	NA	NA	NA	NA	NA	NA	NA	NA	NA	NA	NA	NA	NA	NA	NA	NA	NA	NA	NA	NA	NA	NA	NA	NA	NA	NA	NA	NA	NA	NA	NA	NA	NA	NA	NA	NA	NA	NA	NA	NA	NA
GO_CELL_DIFFERENTIATION_INVOLVED_IN_KIDNEY_DEVELOPMENT	NA	NA	NA	NA	NA	NA	NA	NA	NA	NA	NA	NA	NA	NA	NA	NA	NA	NA	NA	NA	NA	NA	NA	NA	NA	NA	NA	NA	NA	NA	NA	NA	NA	NA	NA	NA	NA	NA	NA	NA	NA	NA	NA	NA	NA	NA	NA	NA	NA
GO_CELL_DIVISION_SITE	NA	NA	NA	NA	NA	NA	0.0060717	0.0991519	NA	NA	NA	NA	0.272486	0.00537364	NA	NA	NA	NA	NA	NA	NA	NA	NA	NA	NA	NA	NA	NA	NA	NA	NA	NA	NA	NA	NA	NA	NA	NA	NA	NA	NA	NA	NA	NA	NA	NA	NA	NA	NA
GO_CELL_GROWTH	NA	NA	0.0222799	0.587373	NA	NA	NA	NA	0.644063	0.00254803	NA	NA	0.694122	0.0105424	0.199351	0.00962602	NA	NA	0.0262338	0.281907	8.21679e-05	0.425559	NA	NA	NA	NA	0.329103	0.0440943	NA	NA	NA	NA	0.0273856	0.0580019	NA	NA	0.472105	0.0358166	NA	NA	NA	NA	NA	NA	NA	NA	NA	NA	NA
GO_CELL_JUNCTION_ASSEMBLY	0.884018	0.0104721	NA	NA	NA	NA	NA	NA	0.0470094	0.307765	NA	NA	0.301571	5.19477e-06	NA	NA	NA	NA	NA	NA	0.000519283	0.796446	NA	NA	NA	NA	NA	NA	NA	NA	NA	NA	NA	NA	NA	NA	0.0194331	0.560206	NA	NA	NA	NA	NA	NA	NA	NA	0.327334	0.0344793	NA
GO_CELL_JUNCTION_MAINTENANCE	NA	NA	NA	NA	NA	NA	NA	NA	NA	NA	NA	NA	NA	NA	NA	NA	0.00165349	0.118105	NA	NA	NA	NA	NA	NA	NA	NA	NA	NA	NA	NA	NA	NA	NA	NA	NA	NA	NA	NA	NA	NA	NA	NA	NA	NA	NA	NA	NA	NA	NA
GO_CELL_KILLING	NA	NA	NA	NA	NA	NA	NA	NA	NA	NA	NA	NA	NA	NA	NA	NA	NA	NA	NA	NA	NA	NA	NA	NA	NA	NA	NA	NA	NA	NA	NA	NA	NA	0.0293601	NA	NA	NA	NA	NA	NA	NA	NA	NA	NA	NA	NA	NA	NA	NA
GO_CELL_LEADING_EDGE	NA	NA	0.440167	0.0418676	0.572073	0.0410486	0.0193743	0.116034	NA	NA	NA	NA	0.0684903	5.49379e-08	0.169287	0.0487825	0.211963	8.38707e-06	NA	NA	NA	NA	NA	NA	NA	NA	NA	NA	NA	NA	NA	NA	0.252718	0.0259363	0.617106	0.000342619	NA	NA	NA	NA	0.321396	0.0124116	0.0640673	0.00607335	NA	NA	NA	NA	NA
GO_CELL_MATRIX_ADHESION	NA	NA	NA	NA	0.0213749	0.64336	0.0331657	0.144299	NA	NA	0.112865	0.0204357	NA	NA	0.00176104	0.259153	NA	NA	NA	NA	0.000118953	0.792745	NA	NA	NA	NA	0.124566	0.022494	NA	NA	0.133254	0.000523267	NA	NA	0.410399	0.000964214	NA	NA	NA	NA	NA	NA	NA	NA	0.759596	0.0123509	NA	NA	NA
GO_CELL_MATURATION	NA	NA	NA	NA	NA	NA	NA	NA	NA	NA	NA	NA	NA	NA	NA	NA	NA	NA	NA	NA	NA	NA	NA	NA	NA	NA	NA	NA	NA	NA	NA	NA	NA	NA	NA	NA	NA	NA	NA	NA	NA	NA	NA	NA	NA	NA	NA	NA	0.0470163
GO_CELL_MIGRATION_IN_HINDBRAIN	NA	NA	NA	NA	NA	NA	NA	NA	0.0283183	NA	NA	NA	NA	NA	NA	NA	NA	NA	NA	NA	NA	NA	NA	NA	NA	NA	NA	NA	NA	NA	NA	NA	NA	NA	NA	NA	NA	NA	NA	NA	NA	NA	NA	NA	NA	NA	NA	NA	NA
GO_CELL_MIGRATION_INVOLVED_IN_SPROUTING_ANGIOGENESIS	NA	NA	0.0416166	0.730789	NA	NA	NA	NA	NA	NA	NA	NA	NA	NA	NA	NA	NA	NA	NA	NA	NA	NA	NA	NA	NA	NA	NA	NA	NA	NA	NA	NA	NA	NA	NA	NA	NA	NA	NA	NA	NA	NA	NA	NA	NA	NA	NA	NA	NA
GO_CELL_PROJECTION_MEMBRANE	0.557137	0.0424604	NA	NA	NA	NA	NA	NA	NA	NA	NA	NA	0.501961	0.0447007	NA	NA	0.447625	0.00965501	0.333397	0.0459396	NA	NA	NA	NA	NA	NA	NA	NA	NA	NA	0.0498523	0.260934	NA	NA	0.864752	0.0109523	NA	NA	NA	NA	0.278972	0.006504	NA	NA	NA	NA	0.000925703	0.425578	NA
GO_CELL_PROLIFERATION_IN_FOREBRAIN	NA	NA	NA	NA	NA	NA	NA	NA	NA	NA	NA	NA	NA	NA	NA	NA	NA	NA	NA	NA	NA	NA	NA	NA	NA	NA	NA	NA	NA	NA	NA	NA	NA	NA	NA	NA	NA	NA	NA	NA	NA	NA	NA	0.0362782	NA	NA	NA	NA	0.018844
GO_CELL_PROLIFERATION_INVOLVED_IN_HEART_MORPHOGENESIS	NA	NA	NA	NA	NA	NA	NA	NA	NA	NA	NA	NA	NA	NA	NA	NA	NA	NA	NA	NA	NA	NA	NA	NA	NA	NA	NA	NA	NA	NA	NA	NA	NA	NA	NA	NA	NA	NA	NA	NA	NA	NA	NA	NA	NA	NA	0.26737	0.0300602	NA
GO_CELL_PROLIFERATION_INVOLVED_IN_KIDNEY_DEVELOPMENT	NA	NA	NA	NA	NA	NA	NA	NA	NA	NA	NA	NA	NA	NA	NA	NA	NA	NA	NA	NA	0.0354666	NA	NA	NA	NA	NA	NA	NA	NA	NA	NA	NA	NA	NA	NA	NA	NA	NA	NA	NA	NA	NA	NA	NA	NA	NA	NA	NA	NA
GO_CELL_SUBSTRATE_ADHESION	0.586162	0.0148536	NA	NA	0.0298666	0.587938	0.00214546	0.475551	NA	NA	0.0189344	0.117304	0.122821	0.00444549	0.00302345	0.0503144	0.0554716	2.91559e-05	0.149304	0.0301087	0.000668606	0.7027	NA	NA	NA	NA	0.118796	0.0213239	NA	NA	NA	NA	0.0109032	0.151057	0.491447	0.00126951	NA	NA	NA	NA	NA	NA	NA	NA	0.618041	0.00913345	0.0214957	0.306468	NA
GO_CELL_SUBSTRATE_JUNCTION	0.0676442	0.00243709	NA	NA	0.750601	0.0194692	NA	NA	0.019467	0.172217	0.504559	0.00619163	0.183348	0.00699626	0.713196	0.00852402	0.0681413	0.000251093	NA	NA	0.00309722	0.0683143	NA	NA	0.0340641	0.980023	NA	NA	0.152836	0.00774479	0.227463	0.0266294	0.065584	0.0266294	0.424244	2.19796e-05	0.0167504	0.0926252	0.0156152	0.398694	NA	NA	0.0298408	0.670778	0.56471	0.00172854	0.0003937	0.316218	NA
GO_CELL_SUBSTRATE_JUNCTION_ORGANIZATION	0.579479	0.0190756	NA	NA	NA	NA	0.0245705	0.794837	NA	NA	NA	NA	0.256112	0.000199387	0.000313744	0.107394	NA	NA	NA	NA	1.51545e-05	0.501233	NA	NA	NA	NA	NA	NA	NA	NA	0.117469	0.00359502	NA	NA	NA	NA	NA	NA	0.0850855	0.0176998	NA	NA	NA	NA	0.70451	0.0119059	0.0981511	0.0198429	0.539559
GO_CELL_SURFACE_RECEPTOR_SIGNALING_PATHWAY_INVOLVED_IN_HEART_DEVELOPMENT	NA	NA	NA	NA	NA	NA	NA	NA	NA	NA	NA	NA	NA	NA	NA	NA	NA	NA	NA	NA	NA	NA	NA	NA	NA	NA	NA	NA	NA	NA	NA	NA	NA	NA	NA	NA	NA	NA	NA	NA	NA	NA	NA	NA	NA	NA	NA	NA	NA
GO_CELL_TRAILING_EDGE	NA	NA	NA	NA	NA	NA	NA	NA	NA	NA	0.00878531	NA	NA	NA	NA	NA	NA	NA	NA	NA	NA	NA	NA	NA	NA	NA	NA	NA	NA	NA	NA	NA	NA	NA	NA	NA	NA	NA	NA	NA	NA	NA	NA	NA	NA	NA	NA	NA	NA
GO_CELL_VOLUME_HOMEOSTASIS	NA	NA	NA	NA	NA	NA	0.0121543	NA	NA	NA	NA	NA	0.0390386	NA	NA	NA	NA	NA	NA	0.0218334	NA	NA	NA	NA	NA	NA	NA	NA	NA	NA	NA	NA	NA	NA	NA	NA	NA	NA	NA	NA	NA	NA	NA	NA	NA	NA	0.00162938	NA	0.021474
GO_CELLULAR_AMINO_ACID_CATABOLIC_PROCESS	NA	NA	NA	NA	NA	NA	0.595841	0.042679	NA	NA	NA	NA	NA	NA	NA	NA	NA	NA	NA	NA	NA	NA	NA	NA	NA	NA	NA	NA	NA	NA	NA	NA	NA	NA	NA	NA	NA	NA	NA	NA	NA	NA	NA	NA	NA	NA	NA	NA	NA
GO_CELLULAR_AMINO_ACID_METABOLIC_PROCESS	NA	NA	NA	NA	NA	NA	0.30807	7.94098e-05	NA	NA	NA	NA	NA	NA	0.0284509	0.335083	0.162683	0.00352791	NA	NA	NA	NA	NA	NA	NA	NA	NA	NA	NA	NA	NA	NA	NA	NA	NA	NA	NA	NA	NA	NA	NA	NA	NA	NA	NA	NA	NA	NA	NA
GO_CELLULAR_ANION_HOMEOSTASIS	NA	NA	NA	NA	NA	NA	NA	NA	NA	NA	NA	NA	NA	NA	NA	NA	NA	NA	NA	0.0270962	NA	NA	NA	NA	NA	NA	NA	NA	NA	NA	NA	NA	NA	NA	NA	NA	NA	NA	NA	NA	NA	NA	NA	NA	NA	NA	NA	NA	NA
GO_CELLULAR_BIOGENIC_AMINE_METABOLIC_PROCESS	NA	NA	NA	NA	NA	NA	NA	NA	NA	NA	NA	NA	0.0142308	NA	NA	NA	NA	NA	NA	NA	NA	NA	NA	NA	NA	NA	NA	NA	NA	NA	NA	NA	NA	NA	NA	NA	NA	NA	NA	NA	NA	NA	NA	NA	NA	NA	NA	NA	NA
GO_CELLULAR_CARBOHYDRATE_BIOSYNTHETIC_PROCESS	NA	NA	NA	NA	NA	NA	NA	NA	NA	NA	NA	NA	0.641707	0.0458443	NA	NA	0.388297	0.00452543	NA	NA	0.0343771	0.443593	NA	NA	NA	NA	NA	NA	NA	NA	NA	NA	NA	NA	NA	NA	NA	NA	NA	NA	0.736823	0.00993802	NA	NA	NA	NA	NA	NA	NA
GO_CELLULAR_CARBOHYDRATE_CATABOLIC_PROCESS	NA	NA	0.00266966	NA	NA	NA	NA	NA	0.561659	0.0299669	NA	NA	NA	NA	NA	NA	0.160636	0.0494251	NA	NA	0.139184	0.0388751	NA	NA	NA	NA	NA	NA	NA	NA	NA	NA	NA	NA	NA	NA	NA	NA	NA	NA	NA	0.0324376	NA	NA	NA	NA	NA	NA	NA
GO_CELLULAR_CARBOHYDRATE_METABOLIC_PROCESS	NA	NA	NA	NA	NA	NA	NA	NA	NA	NA	NA	NA	NA	NA	NA	NA	NA	NA	NA	NA	0.0253769	0.139585	NA	NA	NA	NA	NA	NA	NA	NA	NA	NA	NA	NA	0.79962	0.0448539	NA	NA	NA	NA	0.298908	0.0018537	0.0243356	0.211118	NA	NA	NA	NA	NA
GO_CELLULAR_COMPONENT_ASSEMBLY_INVOLVED_IN_MORPHOGENESIS	NA	NA	NA	NA	NA	NA	0.106961	0.0294138	0.0494458	0.810427	0.0360002	0.0859148	NA	NA	0.0399522	0.358876	0.0978544	0.00410496	0.00563204	0.188314	NA	NA	NA	NA	NA	NA	NA	NA	0.00236627	0.660565	NA	NA	0.312357	0.0260049	0.0268741	0.627163	NA	NA	NA	NA	0.0943189	0.0279692	NA	NA	NA	NA	NA	NA	0.053098
GO_CELLULAR_COMPONENT_DISASSEMBLY_INVOLVED_IN_EXECUTION_PHASE_OF_APOPTOSIS	NA	NA	NA	NA	NA	NA	NA	NA	NA	NA	NA	NA	NA	NA	NA	NA	NA	NA	NA	NA	NA	NA	0.00316154	NA	0.511273	0.000347248	NA	NA	NA	NA	NA	NA	NA	NA	NA	NA	NA	NA	NA	NA	NA	NA	NA	NA	NA	NA	NA	NA	NA
GO_CELLULAR_COMPONENT_MAINTENANCE	NA	NA	NA	NA	NA	NA	NA	NA	NA	NA	NA	NA	NA	NA	NA	NA	0.00258752	0.299609	NA	NA	NA	NA	NA	NA	NA	NA	NA	NA	NA	NA	NA	NA	NA	NA	NA	NA	NA	NA	0.252894	0.00434566	NA	NA	NA	NA	NA	NA	NA	NA	NA
GO_CELLULAR_COPPER_ION_HOMEOSTASIS	NA	NA	NA	NA	NA	NA	NA	NA	NA	NA	NA	NA	NA	NA	NA	NA	NA	NA	NA	NA	NA	NA	NA	NA	0.0285789	NA	NA	NA	NA	NA	NA	NA	NA	NA	NA	NA	NA	NA	NA	NA	NA	NA	NA	NA	NA	NA	NA	NA	NA
GO_CELLULAR_DEFENSE_RESPONSE	NA	NA	NA	NA	NA	NA	NA	NA	NA	NA	NA	NA	NA	NA	NA	NA	NA	NA	NA	NA	NA	NA	NA	NA	NA	NA	NA	NA	NA	NA	NA	NA	NA	NA	NA	NA	NA	NA	NA	NA	NA	NA	NA	NA	0.134297	0.0354247	NA	NA	NA
GO_CELLULAR_EXTRAVASATION	NA	NA	NA	NA	NA	NA	NA	NA	NA	NA	NA	NA	NA	NA	NA	NA	NA	NA	NA	NA	NA	NA	NA	NA	NA	NA	NA	NA	NA	NA	NA	NA	NA	0.0294653	NA	NA	NA	NA	NA	NA	NA	NA	NA	NA	NA	NA	NA	NA	NA
GO_CELLULAR_GLUCAN_METABOLIC_PROCESS	NA	NA	NA	NA	NA	NA	NA	NA	NA	NA	NA	NA	0.286229	0.0286568	NA	NA	0.108647	0.002132	0.0134402	0.439351	NA	NA	NA	NA	NA	NA	NA	NA	NA	NA	NA	NA	NA	NA	NA	NA	NA	NA	NA	NA	NA	0.0260278	NA	NA	NA	NA	NA	NA	NA
GO_CELLULAR_GLUCOSE_HOMEOSTASIS	NA	NA	NA	NA	NA	NA	NA	NA	NA	NA	NA	NA	NA	NA	NA	NA	NA	NA	NA	NA	NA	NA	NA	NA	NA	NA	NA	NA	NA	NA	NA	NA	NA	NA	NA	NA	NA	NA	NA	NA	NA	NA	0.00989717	0.491964	NA	NA	0.0483279	0.20467	NA
GO_CELLULAR_HYPEROSMOTIC_RESPONSE	NA	NA	NA	NA	NA	NA	NA	NA	NA	NA	0.0116558	NA	0.00577399	NA	0.0253324	0.15587	NA	NA	NA	NA	NA	NA	NA	NA	NA	NA	0.0123938	NA	NA	NA	NA	NA	NA	NA	NA	NA	NA	NA	NA	NA	NA	NA	NA	NA	NA	NA	NA	NA	NA
GO_CELLULAR_KETONE_METABOLIC_PROCESS	NA	NA	NA	NA	NA	NA	NA	NA	NA	NA	NA	NA	NA	NA	NA	NA	NA	NA	0.00433208	0.600702	NA	NA	NA	NA	NA	NA	NA	NA	NA	NA	NA	NA	NA	NA	NA	NA	NA	NA	NA	NA	0.0483182	0.907296	NA	NA	NA	NA	NA	NA	0.0476242
GO_CELLULAR_LIPID_CATABOLIC_PROCESS	0.0499487	0.142988	NA	NA	0.0241822	0.124563	NA	NA	NA	NA	NA	NA	0.0374754	0.50536	0.0453792	0.12742	NA	NA	NA	NA	NA	NA	0.0408281	0.0945795	NA	NA	NA	NA	NA	NA	NA	NA	NA	NA	0.0328461	NA	NA	NA	NA	NA	NA	NA	0.0624975	0.0427927	NA	NA	NA	NA	NA
GO_CELLULAR_METABOLIC_COMPOUND_SALVAGE	NA	NA	NA	NA	NA	NA	NA	NA	NA	NA	NA	NA	NA	NA	0.110254	0.00646616	NA	NA	NA	NA	NA	NA	NA	NA	NA	NA	NA	NA	NA	NA	NA	NA	NA	NA	NA	NA	0.00372757	NA	NA	NA	NA	NA	NA	NA	NA	NA	NA	NA	0.227456
GO_CELLULAR_MONOVALENT_INORGANIC_CATION_HOMEOSTASIS	NA	NA	NA	NA	NA	NA	NA	NA	NA	NA	NA	NA	NA	NA	NA	NA	NA	NA	NA	NA	NA	NA	NA	NA	0.64485	0.0204556	NA	NA	NA	NA	NA	NA	NA	NA	NA	NA	NA	NA	NA	NA	NA	NA	NA	NA	NA	NA	NA	NA	NA
GO_CELLULAR_OXIDANT_DETOXIFICATION	NA	NA	NA	NA	NA	NA	NA	NA	NA	NA	NA	NA	NA	NA	NA	NA	NA	NA	NA	NA	NA	NA	NA	NA	NA	NA	NA	NA	NA	NA	NA	NA	0.0204989	NA	NA	NA	NA	NA	NA	NA	NA	NA	NA	NA	NA	NA	NA	NA	NA
GO_CELLULAR_PIGMENTATION	NA	NA	NA	NA	NA	NA	NA	NA	NA	NA	NA	NA	NA	NA	NA	NA	NA	NA	NA	NA	NA	NA	NA	NA	NA	NA	NA	NA	NA	NA	NA	NA	NA	NA	NA	NA	NA	NA	NA	NA	NA	NA	NA	NA	NA	NA	NA	NA	NA
GO_CELLULAR_POLYSACCHARIDE_CATABOLIC_PROCESS	NA	NA	0.036513	NA	NA	NA	NA	NA	NA	NA	NA	NA	NA	NA	NA	NA	NA	NA	NA	NA	NA	NA	NA	NA	NA	NA	NA	NA	NA	NA	NA	NA	NA	NA	NA	NA	NA	NA	NA	NA	NA	NA	NA	NA	NA	NA	NA	NA	NA
GO_CELLULAR_PROTEIN_COMPLEX_DISASSEMBLY	NA	NA	NA	NA	NA	NA	NA	NA	0.564611	0.0180405	NA	NA	0.0116352	0.13972	NA	NA	0.866542	0.0202659	NA	NA	NA	NA	NA	NA	NA	NA	NA	NA	NA	NA	NA	NA	NA	NA	NA	NA	NA	NA	NA	NA	NA	NA	NA	NA	NA	NA	NA	NA	NA
GO_CELLULAR_PROTEIN_CONTAINING_COMPLEX_LOCALIZATION	NA	NA	NA	0.042297	NA	NA	NA	NA	NA	NA	NA	0.0239683	NA	NA	NA	NA	NA	NA	NA	NA	NA	NA	NA	NA	NA	NA	NA	NA	NA	NA	NA	NA	NA	NA	NA	NA	NA	NA	NA	NA	NA	NA	NA	NA	NA	NA	NA	NA	NA
GO_CELLULAR_RESPIRATION	NA	NA	NA	NA	NA	NA	NA	NA	NA	NA	NA	NA	NA	NA	NA	NA	NA	NA	NA	NA	NA	NA	NA	NA	NA	NA	NA	NA	NA	NA	NA	NA	NA	NA	0.041356	0.808051	NA	NA	NA	NA	NA	NA	NA	NA	NA	NA	NA	NA	NA
GO_CELLULAR_RESPONSE_TO_ABIOTIC_STIMULUS	NA	NA	0.601644	0.00944736	0.00674395	0.513067	NA	NA	NA	NA	NA	NA	NA	NA	NA	NA	NA	NA	NA	NA	NA	NA	NA	NA	NA	NA	NA	NA	NA	NA	NA	NA	NA	NA	NA	NA	NA	NA	NA	NA	NA	NA	NA	NA	NA	NA	NA	NA	NA
GO_CELLULAR_RESPONSE_TO_ACID_CHEMICAL	NA	NA	NA	NA	NA	NA	NA	NA	NA	NA	NA	NA	0.125127	0.0311985	NA	NA	NA	NA	NA	NA	NA	NA	NA	NA	NA	NA	NA	0.0354954	NA	NA	NA	NA	NA	NA	NA	NA	NA	NA	NA	NA	NA	NA	NA	NA	NA	NA	NA	NA	NA
GO_CELLULAR_RESPONSE_TO_ALCOHOL	NA	NA	0.0282273	NA	NA	NA	NA	NA	NA	NA	NA	NA	NA	NA	NA	NA	NA	NA	NA	NA	NA	NA	NA	NA	NA	NA	NA	NA	NA	NA	NA	NA	NA	NA	NA	NA	NA	NA	NA	NA	NA	NA	NA	NA	NA	NA	NA	NA	NA
GO_CELLULAR_RESPONSE_TO_ALKALOID	NA	NA	NA	NA	NA	NA	NA	NA	NA	NA	NA	NA	0.220321	0.0171005	NA	NA	NA	NA	NA	NA	NA	NA	NA	NA	NA	NA	NA	NA	NA	NA	NA	NA	NA	NA	0.0484881	NA	NA	NA	NA	NA	NA	NA	NA	NA	NA	NA	NA	NA	NA
GO_CELLULAR_RESPONSE_TO_AMYLOID_BETA	NA	NA	NA	NA	NA	NA	0.0356445	NA	NA	NA	NA	NA	NA	NA	NA	NA	NA	NA	NA	NA	NA	NA	NA	NA	NA	NA	NA	NA	NA	NA	NA	NA	NA	NA	NA	NA	NA	NA	NA	NA	NA	NA	NA	NA	NA	NA	NA	NA	NA
GO_CELLULAR_RESPONSE_TO_ANTIBIOTIC	NA	NA	NA	NA	NA	NA	NA	NA	NA	NA	NA	NA	NA	NA	NA	NA	NA	NA	NA	NA	0.0164023	NA	NA	NA	NA	NA	NA	NA	NA	NA	NA	NA	NA	NA	NA	NA	NA	NA	NA	NA	NA	NA	NA	NA	NA	NA	NA	NA	NA
GO_CELLULAR_RESPONSE_TO_ARSENIC_CONTAINING_SUBSTANCE	NA	NA	NA	0.0259755	NA	NA	NA	0.03728	NA	NA	NA	NA	NA	NA	NA	0.0208784	NA	NA	NA	NA	NA	NA	NA	NA	NA	NA	NA	NA	0.0412453	NA	NA	NA	NA	NA	NA	NA	NA	NA	NA	NA	NA	NA	NA	NA	NA	NA	NA	NA	NA
GO_CELLULAR_RESPONSE_TO_ATP	NA	NA	NA	NA	NA	NA	NA	NA	NA	NA	NA	NA	NA	NA	NA	NA	NA	0.0407011	NA	NA	0.026569	NA	NA	NA	NA	NA	NA	NA	NA	NA	NA	NA	NA	NA	NA	NA	NA	NA	NA	NA	NA	NA	NA	NA	NA	NA	NA	NA	NA
GO_CELLULAR_RESPONSE_TO_BIOTIC_STIMULUS	NA	NA	NA	NA	NA	NA	0.5612	0.0368844	0.272737	0.0108211	NA	NA	NA	NA	NA	NA	NA	NA	NA	NA	NA	NA	NA	NA	NA	NA	NA	NA	NA	NA	NA	NA	NA	NA	NA	NA	NA	NA	NA	NA	NA	NA	0.791532	0.0174229	NA	NA	NA	NA	NA
GO_CELLULAR_RESPONSE_TO_BRAIN_DERIVED_NEUROTROPHIC_FACTOR_STIMULUS	NA	NA	NA	NA	NA	NA	NA	NA	0.012865	NA	NA	NA	NA	NA	NA	NA	NA	NA	NA	NA	NA	NA	NA	NA	NA	NA	NA	NA	NA	NA	NA	NA	NA	NA	NA	NA	NA	NA	NA	NA	NA	NA	NA	NA	NA	NA	0.0120191	0.142162	NA
GO_CELLULAR_RESPONSE_TO_CALCIUM_ION	NA	NA	NA	NA	NA	NA	NA	NA	NA	NA	NA	NA	NA	NA	0.749693	0.00230804	0.136012	0.000679397	NA	NA	NA	NA	NA	NA	NA	NA	0.611377	0.0429358	NA	NA	NA	NA	0.565424	0.0489347	NA	NA	NA	NA	NA	NA	NA	NA	NA	NA	NA	NA	NA	NA	0.0242456
GO_CELLULAR_RESPONSE_TO_CAMP	NA	NA	NA	NA	NA	NA	NA	NA	NA	NA	NA	NA	0.0442773	0.566528	NA	NA	NA	NA	NA	NA	NA	NA	NA	NA	NA	NA	0.45688	0.0138359	NA	NA	NA	NA	NA	NA	NA	NA	NA	NA	NA	NA	NA	NA	NA	NA	NA	NA	NA	NA	NA
GO_CELLULAR_RESPONSE_TO_CARBOHYDRATE_STIMULUS	NA	NA	0.0370375	NA	NA	NA	NA	NA	NA	NA	NA	NA	NA	NA	NA	NA	NA	NA	NA	NA	NA	NA	NA	NA	NA	NA	NA	NA	NA	NA	NA	NA	NA	NA	NA	NA	NA	NA	NA	NA	NA	NA	0.0293549	0.463949	0.0293549	0.858608	0.0388967	0.180006	NA
GO_CELLULAR_RESPONSE_TO_CHEMICAL_STRESS	NA	NA	NA	NA	0.0119748	0.892183	0.522904	0.00395808	NA	NA	NA	NA	NA	NA	0.150829	0.00770806	NA	NA	NA	NA	NA	NA	0.322987	0.00497763	NA	NA	NA	NA	NA	NA	NA	NA	NA	NA	0.0110882	0.208136	NA	NA	NA	NA	NA	NA	NA	NA	0.423747	0.00931349	NA	NA	NA
GO_CELLULAR_RESPONSE_TO_COPPER_ION	NA	NA	0.29955	0.0483973	NA	NA	NA	NA	NA	NA	NA	0.0275437	NA	NA	NA	NA	NA	NA	NA	NA	NA	NA	NA	NA	NA	NA	NA	NA	NA	NA	NA	NA	NA	NA	NA	NA	NA	NA	NA	NA	NA	NA	NA	NA	NA	NA	NA	NA	NA
GO_CELLULAR_RESPONSE_TO_DRUG	NA	NA	NA	NA	NA	NA	0.00572372	0.298043	NA	NA	NA	NA	NA	NA	NA	NA	NA	NA	NA	NA	NA	NA	NA	NA	NA	NA	0.0478343	0.145496	NA	NA	NA	NA	NA	NA	NA	NA	NA	NA	NA	NA	NA	NA	NA	NA	NA	NA	NA	NA	NA
GO_CELLULAR_RESPONSE_TO_DSRNA	NA	NA	NA	NA	NA	NA	NA	NA	NA	NA	0.0243762	NA	NA	NA	NA	NA	0.0455111	0.0586508	NA	NA	NA	NA	NA	NA	NA	NA	0.0258769	NA	NA	NA	NA	NA	NA	NA	NA	NA	NA	NA	NA	NA	NA	0.0433553	NA	NA	NA	NA	NA	NA	NA
GO_CELLULAR_RESPONSE_TO_ELECTRICAL_STIMULUS	NA	NA	NA	NA	NA	NA	NA	NA	NA	NA	NA	NA	0.263886	0.0144869	NA	NA	NA	NA	NA	NA	NA	NA	NA	NA	NA	NA	NA	NA	NA	NA	NA	NA	NA	NA	NA	NA	NA	NA	NA	NA	NA	NA	NA	NA	NA	NA	NA	NA	NA
GO_CELLULAR_RESPONSE_TO_ESTRADIOL_STIMULUS	NA	NA	NA	NA	NA	NA	NA	NA	NA	NA	NA	NA	NA	NA	NA	NA	NA	NA	NA	NA	NA	NA	NA	NA	NA	NA	NA	NA	NA	NA	NA	NA	NA	NA	NA	NA	NA	NA	NA	NA	0.0203937	NA	NA	NA	NA	NA	NA	NA	NA
GO_CELLULAR_RESPONSE_TO_EXOGENOUS_DSRNA	NA	NA	NA	NA	NA	NA	NA	NA	NA	NA	0.0148796	NA	NA	NA	NA	NA	0.0281881	0.265198	NA	NA	NA	NA	NA	NA	NA	NA	0.0158142	NA	NA	NA	NA	NA	NA	NA	NA	NA	NA	NA	NA	NA	NA	0.0268171	NA	NA	NA	NA	NA	NA	NA
GO_CELLULAR_RESPONSE_TO_EXTERNAL_STIMULUS	NA	NA	0.0231384	0.394147	NA	NA	NA	NA	NA	NA	NA	NA	NA	NA	NA	NA	NA	NA	NA	NA	NA	NA	NA	NA	NA	NA	0.00444168	0.372507	NA	NA	NA	NA	NA	NA	0.0179319	0.781369	NA	NA	NA	NA	NA	NA	NA	NA	NA	NA	NA	NA	NA
GO_CELLULAR_RESPONSE_TO_EXTRACELLULAR_STIMULUS	NA	NA	0.042101	0.396775	NA	NA	NA	NA	NA	NA	NA	NA	NA	NA	NA	NA	NA	NA	NA	NA	NA	NA	NA	NA	NA	NA	0.0267063	0.430355	NA	NA	NA	NA	NA	NA	0.0145373	0.651688	NA	NA	NA	NA	NA	NA	NA	NA	NA	NA	NA	NA	0.572152
GO_CELLULAR_RESPONSE_TO_FATTY_ACID	NA	NA	0.0353165	0.515835	NA	NA	NA	NA	NA	NA	NA	NA	NA	NA	NA	NA	NA	NA	NA	NA	NA	NA	NA	NA	NA	NA	NA	NA	NA	NA	NA	NA	NA	NA	NA	NA	NA	NA	NA	NA	NA	NA	NA	NA	NA	NA	NA	NA	NA
GO_CELLULAR_RESPONSE_TO_FLUID_SHEAR_STRESS	NA	NA	0.0284745	NA	NA	NA	NA	NA	NA	NA	NA	NA	NA	NA	NA	NA	NA	NA	NA	NA	NA	NA	NA	NA	NA	NA	NA	NA	NA	NA	NA	NA	NA	NA	NA	NA	NA	NA	NA	NA	0.0407945	NA	NA	NA	NA	0.0315552	NA	NA	NA
GO_CELLULAR_RESPONSE_TO_GAMMA_RADIATION	NA	NA	NA	NA	NA	NA	NA	NA	NA	NA	0.043339	0.243751	NA	NA	NA	NA	NA	NA	NA	NA	NA	NA	NA	NA	NA	NA	0.000361181	NA	NA	NA	NA	NA	NA	NA	NA	NA	NA	NA	NA	NA	NA	NA	NA	NA	NA	NA	NA	NA	NA
GO_CELLULAR_RESPONSE_TO_GLUCOSE_STARVATION	NA	NA	NA	NA	NA	NA	NA	NA	NA	NA	NA	NA	0.0346153	0.538262	NA	NA	NA	NA	NA	NA	NA	NA	NA	NA	NA	NA	NA	NA	NA	NA	NA	NA	NA	NA	NA	NA	NA	NA	NA	NA	0.53227	0.00641979	NA	NA	NA	NA	NA	NA	NA
GO_CELLULAR_RESPONSE_TO_GROWTH_HORMONE_STIMULUS	NA	NA	NA	NA	NA	NA	NA	NA	NA	NA	NA	NA	NA	NA	NA	NA	NA	NA	NA	NA	NA	NA	NA	NA	NA	NA	NA	NA	NA	NA	NA	0.0256038	NA	NA	NA	NA	NA	NA	NA	NA	NA	NA	NA	0.0294018	NA	NA	NA	NA	NA
GO_CELLULAR_RESPONSE_TO_HEAT	NA	0.0322464	NA	NA	NA	NA	NA	NA	NA	NA	NA	NA	NA	NA	NA	NA	NA	NA	NA	NA	NA	NA	NA	NA	NA	NA	NA	NA	NA	NA	NA	NA	NA	NA	0.00879172	0.667629	NA	NA	NA	NA	NA	NA	NA	NA	NA	NA	NA	NA	NA
GO_CELLULAR_RESPONSE_TO_HYDROGEN_PEROXIDE	NA	NA	0.0379852	0.360702	NA	NA	0.803405	0.0191086	NA	NA	NA	NA	NA	NA	0.815463	0.0054166	NA	NA	NA	NA	NA	NA	NA	NA	NA	NA	NA	NA	NA	NA	NA	NA	NA	NA	NA	NA	NA	NA	NA	NA	NA	NA	NA	NA	NA	NA	NA	NA	NA
GO_CELLULAR_RESPONSE_TO_INORGANIC_SUBSTANCE	NA	NA	NA	NA	NA	NA	NA	NA	NA	NA	NA	NA	NA	NA	0.163973	0.012333	0.259297	0.00660485	NA	NA	0.00438176	0.777979	NA	NA	NA	NA	NA	NA	NA	NA	NA	NA	NA	NA	0.383242	0.0443071	NA	NA	NA	NA	NA	NA	NA	NA	NA	NA	NA	NA	NA
GO_CELLULAR_RESPONSE_TO_INSULIN_STIMULUS	NA	NA	NA	NA	NA	NA	NA	NA	NA	NA	NA	NA	NA	NA	NA	NA	NA	NA	NA	NA	NA	NA	0.0349149	0.49269	NA	NA	NA	NA	NA	NA	NA	NA	NA	NA	NA	NA	NA	NA	NA	NA	NA	NA	NA	NA	0.933462	0.0112014	NA	NA	NA
GO_CELLULAR_RESPONSE_TO_INTERFERON_BETA	NA	NA	NA	NA	NA	NA	0.300315	0.0444282	NA	NA	NA	NA	NA	NA	NA	NA	0.0455111	0.328902	NA	NA	NA	NA	NA	NA	NA	NA	NA	NA	0.0490984	NA	NA	NA	NA	NA	NA	NA	NA	NA	0.00486746	NA	NA	0.0433553	NA	NA	NA	NA	NA	NA	NA
GO_CELLULAR_RESPONSE_TO_IONIZING_RADIATION	NA	NA	NA	NA	NA	NA	NA	NA	NA	NA	NA	NA	NA	NA	NA	NA	NA	NA	NA	NA	NA	NA	NA	NA	NA	NA	0.00108547	0.476977	NA	NA	NA	NA	NA	NA	0.0314165	0.45027	NA	NA	NA	NA	NA	NA	0.0469195	0.521527	NA	NA	0.0292286	0.648058	NA
GO_CELLULAR_RESPONSE_TO_KETONE	NA	NA	0.0345436	0.709347	NA	NA	NA	NA	NA	NA	NA	NA	NA	NA	NA	NA	NA	NA	NA	NA	NA	NA	NA	NA	NA	NA	0.0252685	NA	NA	NA	NA	NA	NA	NA	NA	NA	NA	NA	NA	NA	NA	NA	NA	NA	NA	NA	NA	NA	NA
GO_CELLULAR_RESPONSE_TO_LIGHT_STIMULUS	NA	NA	NA	NA	0.0192166	0.549984	NA	NA	NA	NA	NA	NA	NA	NA	NA	NA	NA	NA	NA	NA	NA	NA	NA	NA	NA	NA	NA	NA	NA	NA	NA	NA	NA	NA	NA	NA	NA	NA	NA	NA	NA	NA	NA	NA	NA	NA	NA	NA	NA
GO_CELLULAR_RESPONSE_TO_LIPOPROTEIN_PARTICLE_STIMULUS	NA	NA	NA	NA	NA	NA	NA	NA	NA	NA	NA	NA	NA	NA	NA	NA	NA	NA	NA	NA	NA	NA	NA	NA	NA	NA	NA	NA	NA	NA	NA	NA	NA	NA	NA	NA	NA	0.00031191	NA	NA	NA	NA	NA	NA	NA	NA	NA	0.0171848	NA
GO_CELLULAR_RESPONSE_TO_LOW_DENSITY_LIPOPROTEIN_PARTICLE_STIMULUS	NA	NA	NA	NA	NA	NA	NA	NA	NA	NA	NA	NA	NA	NA	NA	NA	NA	NA	NA	NA	NA	NA	NA	NA	NA	NA	NA	NA	NA	NA	NA	NA	NA	NA	NA	NA	NA	0.0184051	NA	NA	NA	NA	0.030037	NA	NA	NA	NA	0.0473079	NA
GO_CELLULAR_RESPONSE_TO_MECHANICAL_STIMULUS	NA	NA	NA	NA	NA	NA	NA	NA	0.757718	0.00615634	NA	NA	NA	NA	NA	NA	NA	NA	NA	NA	NA	NA	NA	NA	NA	NA	0.0128257	0.172065	NA	NA	NA	NA	NA	NA	NA	NA	NA	NA	NA	NA	NA	NA	NA	NA	NA	NA	NA	NA	NA
GO_CELLULAR_RESPONSE_TO_MOLECULE_OF_BACTERIAL_ORIGIN	NA	NA	NA	NA	NA	NA	NA	NA	0.359298	0.0171911	0.0374657	0.151333	NA	NA	NA	NA	NA	NA	NA	NA	NA	NA	NA	NA	NA	NA	NA	NA	NA	NA	NA	NA	NA	NA	NA	NA	NA	NA	NA	NA	NA	NA	0.930173	0.0333183	NA	NA	NA	NA	NA
GO_CELLULAR_RESPONSE_TO_NITRIC_OXIDE	NA	NA	NA	NA	NA	NA	NA	NA	NA	NA	NA	NA	NA	NA	NA	NA	NA	NA	NA	NA	NA	NA	NA	NA	NA	NA	NA	NA	NA	NA	NA	NA	NA	NA	NA	NA	NA	NA	NA	NA	NA	NA	NA	NA	NA	NA	0.0299597	NA	NA
GO_CELLULAR_RESPONSE_TO_NITROGEN_STARVATION	NA	NA	NA	NA	NA	NA	NA	NA	NA	NA	NA	NA	NA	NA	NA	NA	NA	NA	NA	NA	NA	NA	NA	NA	NA	NA	NA	NA	NA	NA	NA	NA	NA	NA	NA	NA	NA	NA	NA	NA	0.0164196	NA	NA	NA	NA	NA	0.0201405	NA	NA
GO_CELLULAR_RESPONSE_TO_NUTRIENT	NA	NA	NA	NA	NA	NA	0.0336571	NA	NA	NA	NA	NA	NA	NA	NA	NA	NA	NA	NA	NA	NA	NA	NA	NA	NA	NA	NA	NA	NA	NA	NA	NA	NA	NA	NA	NA	NA	NA	NA	NA	NA	NA	NA	NA	NA	NA	0.53281	0.00441588	NA
GO_CELLULAR_RESPONSE_TO_OSMOTIC_STRESS	NA	NA	0.413888	0.00190458	NA	NA	NA	0.0265414	NA	NA	NA	NA	NA	NA	NA	NA	NA	NA	NA	NA	NA	NA	NA	NA	NA	NA	NA	NA	NA	NA	NA	NA	NA	NA	NA	NA	NA	NA	0.181792	0.0214735	NA	NA	0.013422	0.0749951	NA	NA	NA	NA	NA
GO_CELLULAR_RESPONSE_TO_OXYGEN_LEVELS	NA	NA	0.174975	0.0294657	NA	NA	NA	NA	NA	NA	NA	NA	NA	NA	NA	NA	NA	NA	NA	NA	NA	NA	NA	NA	NA	NA	NA	NA	NA	NA	NA	NA	NA	NA	NA	NA	NA	NA	NA	NA	NA	NA	NA	NA	NA	NA	NA	NA	NA
GO_CELLULAR_RESPONSE_TO_OXYGEN_RADICAL	NA	NA	NA	NA	NA	NA	NA	NA	NA	NA	NA	NA	NA	NA	NA	NA	NA	NA	NA	NA	NA	NA	NA	NA	NA	NA	NA	NA	NA	NA	NA	NA	0.000170254	NA	0.0322432	NA	NA	NA	NA	NA	NA	NA	NA	NA	NA	NA	NA	NA	NA
GO_CELLULAR_RESPONSE_TO_PEPTIDE	NA	NA	NA	NA	NA	NA	NA	NA	NA	NA	NA	NA	NA	NA	NA	NA	NA	NA	NA	NA	0.0593716	0.0188826	NA	NA	NA	NA	NA	NA	NA	NA	0.687399	0.0188632	NA	NA	0.049332	0.269408	NA	NA	NA	NA	NA	NA	NA	NA	NA	NA	NA	NA	NA
GO_CELLULAR_RESPONSE_TO_PEPTIDE_HORMONE_STIMULUS	NA	NA	NA	NA	NA	NA	NA	NA	NA	NA	NA	NA	NA	NA	NA	NA	NA	NA	NA	NA	0.100277	0.0250785	NA	NA	NA	NA	NA	NA	NA	NA	0.744759	0.0181098	NA	NA	NA	NA	0.954045	0.0318049	NA	NA	NA	NA	0.752736	0.0268595	0.904929	0.0337112	NA	NA	NA
GO_CELLULAR_RESPONSE_TO_POTASSIUM_ION	NA	NA	NA	0.00810037	NA	NA	NA	NA	NA	NA	NA	NA	NA	NA	NA	NA	NA	NA	NA	0.0196172	NA	NA	NA	NA	NA	NA	NA	NA	NA	NA	NA	NA	NA	NA	NA	NA	NA	NA	NA	NA	NA	NA	NA	NA	NA	NA	NA	NA	NA
GO_CELLULAR_RESPONSE_TO_PROSTAGLANDIN_E_STIMULUS	NA	NA	0.000985905	NA	NA	NA	NA	NA	NA	NA	NA	NA	NA	NA	NA	NA	NA	NA	NA	NA	NA	NA	NA	NA	NA	NA	0.0140586	NA	NA	NA	NA	NA	NA	NA	NA	NA	NA	NA	NA	NA	NA	NA	NA	NA	NA	NA	NA	NA	NA
GO_CELLULAR_RESPONSE_TO_PROSTAGLANDIN_STIMULUS	NA	NA	0.00256393	NA	NA	NA	NA	NA	NA	NA	NA	NA	NA	NA	NA	NA	NA	NA	NA	NA	NA	NA	NA	NA	NA	NA	0.0258769	NA	NA	NA	NA	NA	NA	NA	NA	NA	NA	NA	NA	NA	NA	NA	NA	NA	NA	NA	NA	NA	NA
GO_CELLULAR_RESPONSE_TO_PURINE_CONTAINING_COMPOUND	NA	NA	NA	NA	NA	NA	0.0179117	NA	NA	NA	NA	NA	NA	NA	NA	NA	NA	NA	NA	NA	NA	NA	NA	NA	NA	NA	NA	NA	NA	NA	NA	NA	NA	NA	NA	NA	NA	NA	NA	NA	NA	NA	NA	NA	NA	NA	NA	NA	NA
GO_CELLULAR_RESPONSE_TO_RADIATION	NA	NA	NA	NA	0.0256176	0.503578	NA	NA	NA	NA	NA	NA	NA	NA	NA	NA	NA	NA	NA	NA	NA	NA	NA	NA	NA	NA	0.020783	0.53065	NA	NA	NA	NA	NA	NA	NA	NA	NA	NA	NA	NA	NA	NA	NA	NA	NA	NA	0.0155154	0.943909	NA
GO_CELLULAR_RESPONSE_TO_REACTIVE_NITROGEN_SPECIES	NA	NA	NA	NA	NA	NA	NA	NA	NA	NA	NA	NA	NA	NA	NA	NA	NA	NA	NA	NA	NA	NA	NA	NA	NA	NA	NA	NA	NA	NA	NA	NA	NA	NA	NA	NA	NA	NA	NA	NA	NA	NA	NA	NA	NA	NA	0.0412855	NA	NA
GO_CELLULAR_RESPONSE_TO_REACTIVE_OXYGEN_SPECIES	NA	NA	0.0014598	0.635274	NA	NA	0.51734	0.0162694	NA	NA	NA	NA	NA	NA	0.542892	0.0031403	0.931473	0.0341401	NA	NA	NA	NA	0.39347	0.0360734	NA	NA	NA	NA	NA	NA	NA	NA	NA	NA	0.0292084	0.186668	NA	NA	NA	NA	NA	NA	NA	NA	NA	NA	NA	NA	NA
GO_CELLULAR_RESPONSE_TO_RETINOIC_ACID	NA	NA	NA	NA	NA	NA	NA	NA	NA	NA	NA	NA	NA	NA	NA	NA	NA	NA	NA	NA	NA	NA	NA	NA	NA	NA	NA	NA	NA	NA	NA	NA	NA	NA	NA	NA	NA	NA	NA	NA	NA	NA	NA	NA	NA	NA	NA	NA	NA
GO_CELLULAR_RESPONSE_TO_STARVATION	NA	NA	NA	NA	NA	NA	NA	NA	NA	NA	NA	NA	NA	NA	0.138291	0.0370416	NA	NA	0.200311	0.0466576	NA	NA	NA	NA	NA	NA	0.0395656	0.458244	NA	NA	NA	NA	NA	NA	0.0249558	0.762548	NA	NA	NA	NA	0.107091	0.0382013	NA	NA	NA	NA	NA	NA	NA
GO_CELLULAR_RESPONSE_TO_STEROID_HORMONE_STIMULUS	NA	NA	0.483572	0.0159564	NA	NA	0.0495685	0.0988685	NA	NA	NA	NA	NA	NA	NA	NA	NA	NA	NA	NA	NA	NA	NA	NA	0.0180713	0.119347	NA	NA	NA	NA	0.0344683	0.874917	NA	NA	NA	NA	NA	NA	NA	NA	NA	NA	NA	NA	0.228547	0.0209588	NA	NA	NA
GO_CELLULAR_RESPONSE_TO_STEROL	NA	NA	NA	NA	NA	NA	NA	NA	NA	NA	NA	NA	NA	NA	NA	NA	NA	NA	NA	NA	NA	NA	NA	NA	NA	NA	NA	NA	NA	NA	NA	NA	NA	NA	NA	NA	NA	NA	NA	NA	NA	NA	NA	NA	NA	NA	NA	NA	NA
GO_CELLULAR_RESPONSE_TO_STEROL_DEPLETION	NA	NA	NA	NA	NA	NA	NA	NA	NA	NA	NA	NA	NA	NA	NA	NA	NA	NA	NA	NA	NA	NA	NA	NA	NA	NA	NA	NA	NA	NA	NA	NA	NA	NA	NA	NA	NA	NA	NA	NA	NA	NA	NA	NA	NA	NA	NA	NA	NA
GO_CELLULAR_RESPONSE_TO_TESTOSTERONE_STIMULUS	NA	NA	NA	NA	NA	NA	NA	NA	NA	NA	NA	NA	NA	NA	NA	NA	NA	NA	0.0147096	NA	NA	NA	NA	NA	NA	NA	NA	NA	NA	NA	NA	NA	NA	NA	NA	NA	NA	NA	NA	NA	NA	NA	NA	NA	NA	NA	NA	NA	NA
GO_CELLULAR_RESPONSE_TO_THYROID_HORMONE_STIMULUS	NA	NA	NA	NA	NA	NA	NA	NA	0.26256	0.0253089	NA	NA	NA	NA	NA	NA	NA	NA	NA	NA	NA	NA	NA	NA	0.280198	0.0102529	NA	NA	NA	NA	NA	NA	NA	NA	NA	NA	NA	NA	NA	NA	NA	NA	NA	NA	NA	NA	NA	NA	NA
GO_CELLULAR_RESPONSE_TO_TOPOLOGICALLY_INCORRECT_PROTEIN	NA	NA	NA	NA	NA	NA	NA	NA	NA	NA	NA	NA	NA	NA	0.526815	0.0112518	0.733561	0.0305729	0.0981557	0.0191426	NA	NA	NA	NA	NA	NA	NA	NA	NA	NA	NA	NA	NA	NA	NA	NA	NA	NA	NA	NA	NA	NA	NA	NA	NA	NA	NA	NA	NA
GO_CELLULAR_RESPONSE_TO_TOXIC_SUBSTANCE	NA	NA	NA	NA	NA	NA	NA	NA	NA	NA	NA	NA	NA	NA	NA	NA	NA	NA	NA	NA	NA	NA	NA	NA	NA	NA	NA	NA	NA	NA	NA	NA	0.0352074	NA	NA	NA	NA	NA	NA	NA	NA	NA	NA	NA	NA	NA	NA	NA	NA
GO_CELLULAR_RESPONSE_TO_UV	NA	NA	0.272653	0.019351	NA	NA	NA	NA	NA	NA	NA	NA	NA	NA	NA	NA	NA	NA	NA	NA	NA	NA	NA	NA	NA	NA	NA	NA	NA	NA	NA	NA	NA	NA	NA	NA	NA	NA	NA	NA	NA	NA	NA	NA	NA	NA	NA	NA	NA
GO_CELLULAR_RESPONSE_TO_VASCULAR_ENDOTHELIAL_GROWTH_FACTOR_STIMULUS	NA	0.00834889	NA	NA	NA	NA	NA	NA	NA	NA	NA	NA	NA	NA	NA	NA	0.00629636	NA	NA	NA	NA	NA	NA	NA	NA	NA	NA	NA	NA	NA	0.218785	0.0392212	NA	NA	NA	NA	NA	NA	NA	NA	NA	NA	NA	NA	NA	NA	NA	NA	NA
GO_CELLULAR_RESPONSE_TO_VIRUS	NA	NA	0.193543	0.0471977	NA	NA	NA	NA	NA	NA	NA	NA	NA	NA	NA	NA	NA	NA	NA	NA	NA	NA	NA	NA	0.0342072	0.443731	0.166253	0.0228249	NA	NA	NA	NA	NA	0.0261846	NA	NA	NA	NA	0.0373488	NA	NA	NA	0.175668	0.0316959	NA	NA	NA	NA	NA
GO_CELLULAR_RESPONSE_TO_VITAMIN	NA	NA	NA	NA	NA	NA	NA	NA	NA	NA	NA	NA	NA	NA	NA	NA	NA	NA	NA	NA	NA	NA	NA	NA	NA	NA	NA	NA	NA	NA	NA	NA	NA	NA	NA	NA	NA	NA	NA	NA	NA	NA	NA	NA	NA	NA	NA	0.0124798	NA
GO_CELLULAR_RESPONSE_TO_VITAMIN_D	NA	NA	NA	NA	NA	NA	NA	NA	NA	NA	NA	NA	NA	NA	NA	NA	NA	NA	NA	NA	NA	NA	NA	NA	NA	NA	NA	NA	NA	NA	NA	NA	NA	NA	NA	NA	NA	NA	NA	NA	NA	NA	NA	NA	NA	NA	NA	0.0473079	NA
GO_CELLULAR_RESPONSE_TO_ZINC_ION	NA	NA	NA	0.036513	NA	NA	NA	NA	NA	NA	NA	NA	NA	NA	NA	NA	NA	NA	NA	NA	0.0453387	NA	NA	NA	NA	NA	NA	NA	NA	NA	NA	NA	NA	NA	NA	0.0184962	NA	NA	NA	NA	NA	NA	NA	NA	NA	NA	NA	NA	NA
GO_CELLULAR_SENESCENCE	NA	NA	NA	NA	NA	NA	NA	NA	NA	NA	NA	NA	0.0491765	0.712592	NA	NA	NA	NA	NA	NA	NA	NA	NA	NA	NA	NA	NA	NA	NA	NA	NA	NA	NA	NA	0.0457868	0.501083	NA	NA	NA	NA	NA	NA	NA	NA	0.0144445	0.654914	NA	NA	NA
GO_CENTRAL_NERVOUS_SYSTEM_NEURON_AXONOGENESIS	NA	NA	NA	NA	NA	NA	NA	NA	NA	NA	NA	NA	NA	NA	0.0219894	NA	NA	NA	NA	NA	NA	NA	NA	NA	NA	NA	NA	NA	NA	NA	NA	NA	NA	NA	0.00565456	NA	NA	NA	NA	NA	NA	NA	NA	NA	NA	NA	NA	NA	0.0302011
GO_CENTRAL_NERVOUS_SYSTEM_NEURON_DEVELOPMENT	NA	NA	NA	NA	NA	NA	NA	NA	NA	NA	NA	NA	NA	NA	NA	NA	NA	NA	NA	NA	NA	NA	NA	NA	NA	NA	NA	NA	NA	NA	NA	NA	NA	NA	NA	NA	NA	NA	NA	NA	NA	NA	NA	NA	NA	NA	NA	NA	NA
GO_CENTRAL_NERVOUS_SYSTEM_PROJECTION_NEURON_AXONOGENESIS	NA	NA	NA	NA	NA	NA	NA	NA	NA	NA	NA	NA	NA	NA	NA	NA	NA	NA	NA	NA	NA	NA	NA	NA	NA	NA	NA	NA	NA	NA	NA	NA	NA	NA	0.00221686	NA	NA	NA	NA	NA	NA	NA	NA	NA	0.0377045	NA	NA	NA	0.0163617
GO_CENTRIOLAR_SATELLITE	0.00857192	0.410662	NA	NA	0.106339	0.0118743	NA	NA	NA	NA	0.0886308	0.0117901	NA	NA	NA	NA	NA	NA	NA	NA	NA	NA	NA	NA	NA	NA	0.0236254	NA	0.00454867	0.59991	0.0051712	0.0697472	NA	NA	NA	NA	NA	NA	NA	NA	NA	NA	NA	NA	NA	NA	NA	NA	NA
GO_CENTRIOLE	0.0330631	0.549281	0.270317	0.0352106	NA	NA	NA	NA	NA	NA	NA	NA	NA	NA	0.033211	0.802264	NA	NA	0.290163	0.00835173	NA	NA	NA	NA	NA	NA	0.488317	0.0117231	0.0295156	0.398486	0.0265348	0.419116	NA	NA	NA	NA	NA	NA	NA	NA	NA	NA	NA	NA	5.30705e-05	0.124891	NA	NA	0.0232962
GO_CENTRIOLE_ASSEMBLY	NA	NA	NA	NA	NA	NA	NA	NA	NA	NA	NA	NA	NA	NA	NA	NA	NA	NA	NA	NA	0.436666	0.0300745	NA	NA	0.178069	0.00572948	NA	NA	NA	NA	NA	NA	NA	NA	NA	NA	NA	NA	NA	NA	NA	NA	NA	NA	NA	NA	NA	NA	NA
GO_CENTRIOLE_CENTRIOLE_COHESION	NA	NA	NA	NA	NA	0.0143877	NA	NA	NA	NA	NA	NA	0.0411421	NA	NA	NA	NA	NA	NA	NA	NA	NA	NA	NA	NA	NA	NA	NA	NA	NA	NA	NA	NA	NA	NA	NA	NA	NA	NA	NA	NA	NA	NA	NA	NA	NA	NA	NA	NA
GO_CENTROMERE_COMPLEX_ASSEMBLY	NA	NA	NA	NA	NA	NA	NA	NA	NA	NA	NA	NA	NA	NA	NA	NA	NA	NA	NA	NA	NA	NA	NA	NA	0.0222428	0.401353	NA	NA	NA	NA	NA	NA	NA	NA	NA	NA	NA	NA	NA	NA	NA	NA	NA	NA	NA	NA	NA	NA	NA
GO_CENTROMERIC_SISTER_CHROMATID_COHESION	NA	NA	NA	NA	NA	NA	NA	NA	NA	NA	NA	NA	0.0353922	NA	NA	NA	NA	NA	NA	NA	NA	NA	NA	NA	NA	NA	NA	NA	NA	NA	NA	NA	NA	NA	NA	NA	NA	NA	NA	NA	NA	NA	NA	NA	NA	NA	NA	NA	NA
GO_CENTROSOME_DUPLICATION	NA	NA	NA	NA	NA	NA	NA	NA	NA	NA	NA	NA	NA	NA	NA	NA	NA	NA	NA	NA	NA	NA	NA	NA	0.14147	0.0241647	NA	NA	NA	NA	NA	NA	NA	NA	NA	NA	NA	NA	NA	NA	NA	NA	0.0469195	0.521527	NA	NA	NA	NA	NA
GO_CENTROSOME_SEPARATION	NA	NA	NA	NA	NA	NA	NA	NA	NA	NA	NA	NA	NA	NA	NA	NA	NA	NA	NA	NA	NA	NA	NA	NA	NA	NA	NA	NA	NA	NA	NA	NA	NA	NA	NA	NA	NA	NA	NA	NA	NA	NA	NA	NA	NA	NA	NA	NA	NA
GO_CERAMIDE_BINDING	NA	NA	NA	NA	NA	NA	NA	NA	NA	NA	NA	NA	NA	NA	NA	NA	NA	NA	NA	NA	NA	NA	NA	NA	0.0367543	NA	NA	NA	NA	0.0100146	NA	NA	NA	NA	NA	NA	NA	NA	NA	NA	NA	NA	NA	NA	NA	NA	NA	NA	NA
GO_CERAMIDE_BIOSYNTHETIC_PROCESS	NA	NA	NA	NA	0.555412	0.0156332	NA	NA	NA	NA	NA	NA	NA	NA	NA	NA	NA	NA	NA	NA	NA	NA	NA	NA	NA	NA	NA	NA	NA	NA	0.0437847	NA	NA	NA	NA	NA	0.0239402	0.458842	NA	NA	NA	NA	NA	NA	NA	NA	NA	NA	NA
GO_CERAMIDE_CATABOLIC_PROCESS	NA	NA	NA	NA	0.224127	0.0359387	NA	0.0407945	NA	NA	NA	NA	NA	NA	NA	NA	NA	NA	NA	NA	0.0354666	NA	NA	NA	NA	NA	NA	NA	NA	NA	NA	NA	NA	NA	NA	NA	NA	NA	NA	NA	0.00389292	NA	NA	NA	NA	0.0315552	NA	NA	NA
GO_CERAMIDE_METABOLIC_PROCESS	NA	NA	NA	NA	0.702072	0.0145721	NA	NA	NA	NA	NA	NA	NA	NA	NA	NA	0.0201157	0.53861	0.0423504	0.599544	NA	NA	NA	NA	NA	NA	NA	NA	NA	NA	NA	NA	NA	NA	NA	NA	0.0137573	0.600392	NA	NA	NA	NA	NA	NA	NA	NA	NA	NA	NA
GO_CERAMIDE_TRANSPORT	NA	NA	NA	NA	NA	NA	NA	NA	NA	NA	NA	NA	NA	NA	0.0221965	NA	NA	NA	NA	NA	NA	NA	NA	NA	NA	NA	NA	NA	NA	0.00769032	NA	NA	NA	NA	0.00851133	NA	NA	NA	NA	NA	NA	NA	NA	NA	0.0115834	0.171576	NA	NA	NA
GO_CEREBELLAR_CORTEX_FORMATION	NA	NA	NA	NA	NA	NA	NA	NA	NA	NA	NA	NA	NA	NA	NA	NA	NA	NA	NA	NA	NA	NA	NA	NA	NA	NA	NA	NA	NA	NA	NA	NA	NA	NA	NA	NA	NA	NA	NA	NA	NA	NA	NA	NA	NA	NA	NA	NA	NA
GO_CEREBELLAR_CORTEX_MORPHOGENESIS	NA	NA	NA	NA	NA	NA	NA	NA	NA	NA	NA	NA	NA	NA	NA	NA	NA	NA	NA	NA	NA	NA	NA	NA	NA	NA	NA	NA	NA	NA	NA	NA	NA	NA	NA	NA	NA	NA	NA	NA	NA	NA	NA	NA	NA	NA	NA	NA	NA
GO_CEREBELLAR_PURKINJE_CELL_LAYER_DEVELOPMENT	NA	NA	0.29955	0.0483973	NA	NA	NA	NA	NA	NA	NA	NA	NA	NA	NA	NA	NA	NA	NA	NA	NA	NA	NA	NA	NA	NA	NA	NA	NA	NA	NA	NA	NA	NA	NA	NA	NA	NA	NA	NA	NA	NA	NA	NA	NA	NA	NA	NA	NA
GO_CEREBELLAR_PURKINJE_CELL_LAYER_FORMATION	NA	NA	NA	NA	NA	NA	NA	NA	NA	NA	NA	NA	NA	NA	NA	NA	NA	NA	NA	NA	NA	NA	NA	NA	NA	NA	NA	NA	NA	NA	NA	NA	NA	NA	NA	NA	NA	NA	NA	NA	NA	NA	NA	NA	NA	NA	NA	NA	NA
GO_CEREBELLAR_PURKINJE_CELL_LAYER_MORPHOGENESIS	NA	NA	NA	NA	NA	NA	NA	NA	NA	NA	NA	NA	NA	NA	NA	NA	NA	NA	NA	NA	NA	NA	NA	NA	NA	NA	NA	NA	NA	NA	NA	NA	NA	NA	NA	NA	NA	NA	NA	NA	NA	NA	NA	NA	NA	NA	NA	NA	NA
GO_CEREBRAL_CORTEX_CELL_MIGRATION	NA	NA	NA	NA	NA	NA	NA	NA	NA	NA	NA	NA	NA	NA	NA	NA	NA	NA	NA	NA	NA	NA	NA	NA	NA	NA	NA	NA	NA	NA	NA	NA	NA	NA	0.00869922	0.308786	NA	NA	NA	NA	0.478577	0.0256317	NA	NA	NA	NA	NA	NA	NA
GO_CEREBRAL_CORTEX_DEVELOPMENT	NA	NA	NA	NA	NA	NA	NA	NA	NA	NA	NA	NA	NA	NA	NA	NA	NA	NA	0.660496	0.00979824	NA	NA	NA	NA	NA	NA	0.0466459	0.307664	NA	NA	NA	NA	NA	NA	NA	NA	NA	NA	NA	NA	0.543762	0.0339461	NA	NA	NA	NA	NA	NA	NA
GO_CEREBRAL_CORTEX_RADIALLY_ORIENTED_CELL_MIGRATION	NA	NA	NA	NA	NA	NA	NA	NA	NA	NA	NA	NA	NA	NA	NA	NA	NA	NA	NA	NA	NA	NA	NA	NA	NA	NA	NA	0.0346499	NA	NA	NA	NA	NA	NA	0.0388944	0.23853	NA	NA	NA	NA	NA	NA	NA	NA	NA	NA	NA	NA	NA
GO_CGMP_MEDIATED_SIGNALING	NA	NA	NA	NA	NA	NA	NA	NA	NA	NA	NA	NA	NA	NA	0.0134526	NA	NA	NA	NA	NA	NA	NA	NA	NA	NA	NA	NA	NA	NA	NA	NA	NA	NA	NA	NA	NA	NA	NA	NA	NA	NA	NA	NA	NA	NA	NA	NA	NA	NA
GO_CGMP_METABOLIC_PROCESS	NA	NA	NA	NA	NA	NA	NA	NA	NA	0.0253089	NA	NA	NA	NA	0.0321022	NA	NA	NA	NA	NA	NA	NA	NA	NA	NA	NA	NA	NA	NA	NA	NA	NA	NA	NA	NA	NA	NA	NA	NA	NA	NA	NA	NA	NA	NA	NA	NA	NA	NA
GO_CHANNEL_INHIBITOR_ACTIVITY	NA	NA	NA	NA	NA	NA	NA	NA	NA	NA	NA	NA	NA	NA	NA	NA	NA	NA	NA	NA	NA	0.028696	NA	NA	NA	NA	NA	NA	NA	NA	NA	NA	NA	NA	NA	NA	NA	NA	NA	NA	NA	NA	NA	NA	NA	NA	NA	NA	NA
GO_CHANNEL_REGULATOR_ACTIVITY	NA	NA	NA	NA	NA	NA	NA	NA	NA	NA	0.808792	0.0489874	NA	NA	NA	NA	NA	NA	NA	NA	NA	NA	NA	NA	NA	NA	NA	NA	NA	0.0140316	NA	NA	NA	NA	NA	NA	NA	NA	NA	NA	NA	NA	NA	NA	NA	NA	NA	NA	NA
GO_CHAPERONE_BINDING	NA	NA	NA	NA	NA	NA	NA	NA	NA	NA	NA	NA	NA	NA	0.521047	0.00638319	NA	NA	NA	NA	0.00372833	NA	NA	NA	NA	NA	NA	NA	NA	NA	NA	NA	NA	NA	NA	NA	NA	NA	NA	NA	NA	NA	NA	NA	NA	NA	NA	NA	NA
GO_CHAPERONE_COFACTOR_DEPENDENT_PROTEIN_REFOLDING	NA	NA	NA	NA	NA	NA	NA	NA	NA	NA	NA	NA	NA	NA	NA	NA	NA	NA	NA	NA	NA	NA	NA	NA	NA	NA	NA	NA	NA	NA	NA	NA	NA	NA	NA	NA	0.0349262	NA	NA	NA	NA	NA	NA	NA	NA	NA	NA	NA	NA
GO_CHAPERONE_COMPLEX	NA	NA	NA	0.0393642	NA	NA	NA	NA	NA	NA	NA	NA	NA	NA	NA	NA	NA	NA	NA	NA	NA	NA	NA	NA	NA	NA	NA	NA	NA	NA	NA	NA	NA	NA	NA	NA	NA	NA	NA	NA	NA	NA	NA	NA	NA	NA	NA	NA	NA
GO_CHAPERONE_MEDIATED_AUTOPHAGY	NA	NA	NA	NA	NA	NA	NA	NA	NA	NA	NA	NA	NA	NA	0.000118945	NA	NA	NA	0.264895	0.0400757	NA	NA	NA	NA	NA	NA	NA	NA	NA	NA	NA	0.0108601	NA	0.0108601	NA	NA	NA	NA	NA	NA	NA	NA	NA	NA	NA	NA	NA	NA	NA
GO_CHAPERONE_MEDIATED_PROTEIN_COMPLEX_ASSEMBLY	NA	NA	NA	NA	NA	NA	NA	NA	NA	NA	NA	NA	NA	NA	NA	NA	NA	NA	NA	NA	NA	NA	NA	NA	NA	NA	NA	NA	NA	NA	NA	NA	NA	NA	NA	NA	NA	NA	NA	NA	NA	NA	NA	NA	NA	0.0344105	NA	NA	NA
GO_CHAPERONE_MEDIATED_PROTEIN_FOLDING	NA	NA	NA	NA	NA	NA	NA	NA	NA	NA	NA	NA	NA	NA	NA	NA	NA	NA	0.0273654	0.119476	NA	NA	NA	NA	NA	NA	NA	NA	NA	NA	NA	NA	NA	NA	NA	NA	0.0179144	NA	NA	NA	NA	NA	NA	NA	NA	NA	NA	NA	NA
GO_CHEMICAL_HOMEOSTASIS_WITHIN_A_TISSUE	NA	NA	NA	NA	NA	NA	NA	NA	NA	NA	NA	NA	NA	NA	NA	NA	NA	NA	NA	NA	NA	NA	NA	NA	0.0179369	NA	NA	NA	NA	NA	NA	NA	NA	NA	NA	NA	NA	NA	NA	NA	NA	NA	NA	NA	NA	NA	NA	NA	NA
GO_CHEMICAL_SYNAPTIC_TRANSMISSION_POSTSYNAPTIC	NA	NA	NA	NA	NA	NA	0.00954292	0.247599	0.0494458	0.227606	NA	NA	0.538926	0.0312849	NA	NA	0.522873	0.0156788	NA	NA	NA	NA	NA	NA	NA	NA	NA	NA	NA	NA	NA	NA	NA	NA	NA	NA	NA	NA	NA	NA	NA	NA	NA	NA	NA	NA	NA	NA	NA
GO_CHEMOATTRACTANT_ACTIVITY	NA	NA	NA	NA	NA	NA	NA	NA	NA	NA	NA	NA	NA	NA	NA	NA	NA	NA	NA	NA	NA	NA	NA	NA	NA	NA	NA	NA	NA	NA	NA	NA	NA	NA	NA	NA	NA	NA	NA	NA	NA	NA	NA	NA	NA	NA	NA	NA	0.0317715
GO_CHEMOKINE_C_C_MOTIF_LIGAND_5_PRODUCTION	NA	NA	NA	NA	NA	NA	NA	NA	NA	NA	NA	NA	NA	NA	NA	NA	NA	NA	NA	NA	NA	NA	NA	NA	NA	NA	NA	NA	NA	NA	NA	NA	NA	NA	NA	NA	NA	NA	NA	NA	NA	NA	NA	NA	NA	NA	NA	NA	NA
GO_CHEMOKINE_C_X_C_MOTIF_LIGAND_2_PRODUCTION	NA	NA	NA	NA	NA	NA	NA	NA	NA	NA	NA	NA	NA	NA	0.0253324	NA	NA	NA	0.0322421	NA	NA	NA	NA	NA	NA	NA	NA	NA	NA	NA	NA	NA	NA	NA	NA	NA	NA	NA	NA	NA	NA	NA	NA	NA	NA	NA	NA	NA	NA
GO_CHEMOKINE_SECRETION	NA	NA	NA	NA	NA	NA	NA	NA	NA	NA	NA	NA	NA	NA	NA	NA	0.019447	NA	NA	NA	NA	NA	NA	NA	NA	NA	NA	NA	NA	NA	NA	NA	NA	NA	NA	NA	NA	NA	NA	NA	NA	NA	NA	NA	NA	NA	NA	NA	NA
GO_CHEMOREPELLENT_ACTIVITY	NA	NA	NA	NA	NA	NA	NA	NA	NA	NA	NA	NA	NA	NA	NA	NA	NA	NA	NA	NA	NA	NA	NA	NA	NA	NA	NA	NA	NA	NA	NA	NA	NA	NA	NA	NA	NA	NA	NA	NA	NA	NA	NA	NA	NA	NA	0.383737	0.00861807	NA
GO_CHLORIDE_CHANNEL_COMPLEX	NA	NA	NA	NA	NA	NA	0.0464613	NA	NA	NA	NA	NA	NA	NA	NA	NA	NA	NA	NA	NA	NA	NA	NA	NA	NA	NA	NA	NA	NA	NA	NA	NA	NA	NA	NA	NA	NA	NA	NA	NA	NA	NA	NA	NA	NA	NA	NA	NA	NA
GO_CHLORIDE_CHANNEL_REGULATOR_ACTIVITY	NA	NA	NA	NA	NA	NA	NA	NA	NA	NA	NA	NA	NA	NA	0.0321022	NA	0.0281881	NA	NA	NA	NA	NA	NA	NA	NA	NA	NA	NA	NA	0.011279	NA	NA	NA	NA	NA	NA	NA	NA	NA	NA	NA	NA	NA	NA	NA	NA	NA	NA	NA
GO_CHLORIDE_ION_BINDING	NA	NA	NA	NA	NA	NA	NA	NA	NA	NA	NA	NA	NA	NA	NA	NA	NA	NA	NA	NA	NA	NA	NA	NA	NA	NA	NA	NA	NA	NA	NA	NA	NA	NA	NA	NA	NA	NA	NA	NA	NA	NA	NA	NA	0.0100061	NA	NA	NA	NA
GO_CHLORIDE_ION_HOMEOSTASIS	NA	NA	NA	NA	NA	NA	NA	NA	NA	NA	NA	NA	NA	NA	NA	NA	NA	NA	NA	0.00247951	NA	NA	NA	NA	NA	NA	NA	NA	NA	NA	NA	NA	NA	NA	NA	NA	NA	NA	NA	NA	NA	NA	NA	NA	NA	NA	0.0232347	NA	0.00486042
GO_CHLORIDE_TRANSMEMBRANE_TRANSPORTER_ACTIVITY	NA	NA	NA	NA	NA	NA	NA	NA	NA	NA	NA	NA	NA	NA	NA	NA	NA	NA	NA	0.0169206	NA	NA	NA	NA	NA	NA	NA	NA	NA	NA	NA	NA	NA	NA	NA	NA	NA	NA	NA	NA	NA	NA	NA	NA	NA	NA	NA	NA	NA
GO_CHLORIDE_TRANSPORT	NA	NA	NA	NA	NA	NA	0.0337091	NA	NA	NA	NA	NA	NA	NA	NA	NA	NA	NA	NA	0.0245399	NA	NA	NA	NA	NA	NA	NA	NA	NA	NA	NA	NA	NA	NA	NA	NA	NA	NA	NA	NA	NA	NA	NA	NA	NA	NA	NA	NA	NA
GO_CHOLESTEROL_BINDING	NA	NA	NA	NA	NA	NA	NA	NA	0.215944	0.0352314	NA	NA	NA	NA	NA	NA	NA	NA	NA	NA	NA	NA	0.324656	0.0497407	NA	NA	NA	NA	0.0452406	0.376203	NA	NA	NA	NA	NA	NA	NA	NA	NA	NA	NA	NA	0.0202825	0.411937	NA	NA	NA	NA	NA
GO_CHOLESTEROL_EFFLUX	NA	NA	NA	NA	NA	NA	NA	NA	NA	NA	NA	NA	NA	NA	NA	NA	NA	NA	0.345005	0.0396344	NA	NA	NA	NA	NA	NA	NA	NA	NA	NA	NA	NA	NA	NA	NA	NA	NA	NA	NA	NA	NA	NA	NA	NA	NA	NA	NA	NA	NA
GO_CHOLESTEROL_STORAGE	NA	NA	NA	NA	NA	NA	0.0405341	0.26649	NA	NA	NA	NA	NA	NA	NA	NA	NA	NA	NA	NA	NA	NA	0.010911	0.136302	NA	NA	NA	NA	0.0412453	NA	NA	NA	0.0170807	0.18196	NA	NA	NA	NA	NA	NA	NA	NA	NA	NA	NA	NA	NA	0.0365967	0.00985188
GO_CHONDROCYTE_DEVELOPMENT	NA	NA	NA	NA	NA	NA	NA	NA	NA	NA	NA	NA	NA	NA	NA	NA	NA	NA	NA	NA	NA	NA	0.219812	0.0214054	NA	NA	NA	NA	NA	NA	NA	NA	NA	NA	NA	NA	NA	NA	NA	0.0120492	NA	NA	NA	NA	NA	NA	NA	NA	NA
GO_CHONDROCYTE_DIFFERENTIATION	NA	NA	NA	NA	NA	NA	NA	NA	NA	NA	0.0311956	0.631558	NA	NA	NA	NA	NA	NA	NA	NA	NA	NA	NA	NA	NA	NA	NA	NA	NA	NA	NA	NA	NA	NA	NA	NA	NA	NA	NA	NA	NA	NA	NA	0.0285175	NA	NA	NA	NA	NA
GO_CHONDROCYTE_DIFFERENTIATION_INVOLVED_IN_ENDOCHONDRAL_BONE_MORPHOGENESIS	NA	NA	NA	NA	NA	NA	NA	NA	NA	NA	NA	NA	NA	NA	NA	NA	NA	NA	NA	NA	NA	NA	NA	NA	NA	NA	NA	NA	NA	NA	NA	NA	NA	NA	NA	NA	NA	NA	NA	NA	NA	NA	NA	NA	NA	NA	NA	NA	NA
GO_CHONDROITIN_SULFATE_BINDING	NA	NA	NA	NA	NA	NA	NA	NA	NA	NA	NA	NA	NA	NA	NA	NA	NA	NA	NA	NA	NA	NA	NA	NA	NA	NA	NA	NA	NA	NA	NA	NA	NA	NA	NA	NA	NA	NA	NA	NA	NA	NA	NA	NA	NA	NA	NA	NA	NA
GO_CHONDROITIN_SULFATE_PROTEOGLYCAN_METABOLIC_PROCESS	0.311415	0.0247024	NA	NA	NA	NA	NA	NA	NA	NA	NA	NA	NA	NA	NA	NA	NA	NA	NA	NA	NA	NA	NA	NA	NA	NA	NA	NA	NA	NA	NA	NA	NA	NA	NA	NA	NA	NA	NA	NA	NA	NA	NA	NA	NA	NA	NA	NA	NA
GO_CHROMATIN_ASSEMBLY_OR_DISASSEMBLY	NA	NA	NA	NA	NA	NA	NA	NA	NA	NA	NA	NA	NA	NA	NA	NA	NA	NA	NA	NA	NA	NA	NA	NA	NA	NA	NA	NA	NA	NA	NA	NA	NA	NA	NA	NA	NA	NA	NA	NA	NA	NA	NA	NA	NA	NA	NA	NA	NA
GO_CHROMATIN_DISASSEMBLY	NA	NA	NA	0.0019336	NA	NA	NA	NA	NA	NA	NA	NA	NA	NA	NA	NA	NA	NA	NA	NA	NA	NA	NA	NA	NA	NA	NA	NA	NA	NA	NA	NA	NA	NA	NA	NA	NA	NA	NA	NA	NA	NA	NA	NA	NA	NA	NA	NA	NA
GO_CHROMATIN_DNA_BINDING	NA	NA	NA	NA	NA	NA	0.24346	0.0239039	NA	NA	NA	NA	NA	NA	NA	NA	0.0251396	0.296849	NA	NA	NA	NA	NA	NA	NA	NA	NA	NA	NA	NA	0.713599	0.0217694	0.659717	0.000684733	NA	NA	NA	NA	NA	NA	NA	NA	0.358331	0.0276769	NA	NA	NA	NA	NA
GO_CHROMATIN_MEDIATED_MAINTENANCE_OF_TRANSCRIPTION	NA	NA	0.0112986	0.152307	NA	NA	NA	NA	NA	NA	NA	NA	NA	NA	NA	NA	NA	NA	NA	NA	NA	NA	NA	NA	NA	NA	NA	NA	NA	NA	NA	NA	NA	NA	NA	NA	NA	NA	NA	NA	NA	NA	NA	NA	NA	NA	NA	NA	NA
GO_CHROMATIN_ORGANIZATION_INVOLVED_IN_REGULATION_OF_TRANSCRIPTION	NA	NA	NA	NA	NA	NA	NA	NA	NA	NA	NA	NA	0.556093	0.0360997	NA	NA	NA	NA	NA	NA	NA	NA	NA	NA	NA	NA	NA	NA	NA	NA	0.0365955	0.204799	NA	NA	NA	NA	NA	NA	NA	NA	NA	NA	NA	NA	NA	NA	0.750116	0.032306	NA
GO_CHROMATIN_REMODELING	NA	NA	NA	NA	NA	NA	NA	NA	0.0161879	0.833014	NA	NA	NA	NA	NA	NA	NA	NA	NA	NA	NA	NA	0.251941	0.021958	NA	NA	NA	NA	NA	NA	NA	NA	NA	NA	NA	NA	NA	NA	NA	NA	NA	NA	NA	NA	NA	NA	NA	NA	NA
GO_CHROMATIN_REMODELING_AT_CENTROMERE	NA	NA	NA	NA	NA	NA	NA	NA	NA	NA	NA	NA	NA	NA	NA	NA	NA	NA	NA	NA	NA	NA	NA	NA	0.0123406	0.349831	NA	NA	NA	NA	NA	NA	NA	NA	NA	NA	NA	NA	NA	NA	NA	NA	NA	NA	NA	NA	NA	NA	NA
GO_CHROMATOID_BODY	NA	NA	NA	NA	NA	NA	NA	NA	NA	NA	NA	NA	NA	NA	NA	NA	NA	NA	NA	NA	NA	NA	NA	NA	NA	NA	NA	NA	NA	NA	NA	NA	NA	NA	NA	NA	NA	NA	NA	NA	NA	0.0160038	NA	NA	NA	NA	NA	NA	NA
GO_CHROMOSOMAL_REGION	NA	NA	NA	NA	NA	NA	0.0130735	0.467507	NA	NA	NA	NA	0.0370796	0.322721	NA	NA	NA	NA	NA	NA	NA	NA	NA	NA	NA	NA	NA	NA	NA	NA	NA	NA	NA	NA	0.290925	0.0373455	NA	NA	NA	NA	0.467507	0.0457079	NA	NA	NA	NA	NA	NA	NA
GO_CHROMOSOME_CENTROMERIC_REGION	NA	NA	NA	NA	0.907389	0.0232042	NA	NA	NA	NA	NA	NA	0.0111427	0.367034	0.0470172	0.17911	NA	NA	NA	NA	NA	NA	NA	NA	NA	NA	NA	NA	NA	NA	NA	NA	NA	NA	0.137013	0.0291229	NA	NA	NA	NA	NA	NA	NA	NA	NA	NA	NA	NA	NA
GO_CHROMOSOME_LOCALIZATION	NA	NA	NA	NA	NA	NA	NA	NA	NA	NA	NA	NA	0.595492	0.00792718	NA	NA	NA	NA	NA	NA	NA	NA	NA	NA	NA	NA	NA	NA	NA	NA	NA	NA	NA	NA	0.189653	0.00509702	NA	NA	NA	NA	NA	NA	NA	NA	NA	NA	NA	NA	NA
GO_CHROMOSOME_ORGANIZATION_INVOLVED_IN_MEIOTIC_CELL_CYCLE	NA	NA	NA	NA	NA	NA	NA	NA	NA	NA	NA	NA	NA	NA	NA	NA	NA	NA	NA	NA	NA	NA	NA	NA	NA	NA	0.0461891	NA	NA	NA	NA	NA	NA	NA	NA	NA	NA	NA	NA	NA	NA	NA	NA	NA	NA	NA	NA	NA	NA
GO_CHROMOSOME_SEGREGATION	NA	NA	NA	NA	NA	NA	0.0446715	0.144239	NA	NA	NA	NA	NA	NA	NA	NA	NA	NA	0.00504656	0.664616	NA	NA	NA	NA	NA	NA	NA	NA	NA	NA	NA	NA	NA	NA	0.853509	0.00275564	NA	NA	NA	NA	0.00575499	0.244927	0.362785	0.0285701	NA	NA	NA	NA	NA
GO_CHROMOSOME_SEPARATION	NA	NA	NA	NA	NA	NA	NA	NA	NA	NA	NA	NA	NA	NA	NA	NA	NA	NA	NA	NA	NA	NA	NA	NA	NA	NA	NA	0.0122542	NA	NA	NA	NA	NA	NA	NA	NA	NA	NA	NA	NA	NA	NA	NA	NA	NA	NA	NA	NA	NA
GO_CHROMOSOME_TELOMERIC_REGION	NA	NA	NA	0.0180279	NA	NA	0.0497616	0.921988	NA	NA	NA	NA	NA	NA	NA	NA	NA	NA	NA	NA	NA	NA	NA	NA	NA	NA	NA	NA	NA	NA	NA	NA	NA	NA	NA	NA	NA	NA	NA	NA	NA	NA	NA	NA	NA	NA	NA	NA	NA
GO_CILIARY_BASAL_BODY	0.00992238	0.576186	0.0459713	0.131058	NA	NA	NA	NA	NA	NA	NA	NA	NA	NA	0.044994	0.249808	NA	NA	0.00945434	0.0905768	NA	NA	NA	NA	NA	NA	NA	NA	NA	NA	0.000467209	0.0687826	NA	NA	0.461706	0.0114741	NA	NA	NA	NA	NA	NA	NA	NA	NA	NA	0.0495976	0.416336	NA
GO_CILIARY_BASAL_BODY_PLASMA_MEMBRANE_DOCKING	0.0464509	0.410662	NA	NA	NA	NA	NA	NA	NA	NA	NA	NA	NA	NA	NA	NA	NA	NA	NA	NA	0.392615	0.0039899	0.0403678	0.152763	1.39673e-05	0.0559884	NA	NA	NA	NA	NA	NA	NA	NA	NA	NA	NA	NA	NA	0.0146574	NA	NA	NA	NA	0.00546392	0.362774	NA	NA	0.0353265
GO_CILIARY_BASE	NA	NA	NA	NA	NA	NA	NA	NA	NA	NA	NA	NA	NA	NA	NA	NA	NA	NA	NA	NA	NA	NA	NA	NA	NA	NA	NA	NA	NA	NA	NA	NA	NA	NA	NA	NA	NA	NA	NA	NA	NA	NA	NA	NA	NA	NA	NA	NA	NA
GO_CILIARY_PLASM	NA	NA	NA	NA	NA	NA	NA	NA	NA	NA	NA	NA	NA	NA	NA	NA	NA	NA	NA	NA	NA	NA	NA	NA	NA	NA	NA	NA	NA	NA	NA	NA	NA	NA	0.356538	0.000110232	NA	NA	NA	NA	NA	NA	NA	NA	NA	NA	NA	NA	NA
GO_CILIARY_ROOTLET	NA	NA	NA	NA	NA	NA	NA	NA	NA	NA	NA	NA	0.0299857	NA	NA	NA	NA	NA	NA	NA	NA	NA	NA	NA	NA	NA	NA	NA	NA	NA	NA	NA	NA	NA	NA	NA	NA	NA	NA	NA	NA	0.011512	NA	NA	NA	NA	NA	NA	NA
GO_CILIARY_TIP	NA	NA	NA	NA	NA	0.0281175	NA	NA	NA	NA	NA	NA	NA	NA	NA	NA	NA	NA	NA	NA	NA	NA	NA	NA	NA	NA	NA	NA	NA	NA	NA	NA	NA	NA	NA	0.00757171	NA	NA	NA	NA	0.157295	0.0324376	NA	NA	NA	NA	NA	NA	NA
GO_CILIARY_TRANSITION_FIBER	NA	NA	NA	NA	NA	NA	NA	NA	NA	NA	NA	NA	NA	NA	NA	NA	NA	NA	NA	NA	NA	NA	NA	NA	0.014862	NA	NA	NA	NA	NA	NA	NA	NA	0.00423592	NA	NA	NA	NA	NA	NA	NA	NA	NA	NA	NA	NA	NA	NA	NA
GO_CILIARY_TRANSITION_ZONE	0.0205691	NA	NA	NA	NA	NA	NA	NA	NA	NA	NA	NA	NA	NA	NA	NA	NA	NA	0.0425493	0.404682	NA	NA	NA	NA	0.0103452	0.468688	NA	NA	NA	NA	1.58921e-05	NA	NA	NA	0.0326075	0.122208	0.025839	NA	NA	NA	0.0899901	0.0207258	NA	NA	0.00910384	0.0648336	0.030623	0.282684	NA
GO_CILIUM_MOVEMENT	NA	NA	NA	NA	NA	NA	NA	NA	NA	NA	NA	NA	NA	NA	NA	NA	NA	NA	NA	NA	NA	NA	NA	NA	NA	NA	NA	NA	NA	NA	NA	NA	NA	NA	NA	NA	NA	NA	0.0384751	NA	NA	NA	NA	NA	NA	NA	NA	NA	NA
GO_CILIUM_OR_FLAGELLUM_DEPENDENT_CELL_MOTILITY	NA	NA	NA	NA	NA	NA	NA	NA	NA	NA	NA	NA	NA	NA	NA	NA	NA	NA	NA	NA	NA	NA	NA	NA	NA	NA	NA	NA	NA	NA	NA	NA	NA	NA	NA	NA	NA	NA	0.0205214	NA	NA	NA	NA	NA	NA	NA	NA	NA	NA
GO_CILIUM_ORGANIZATION	NA	NA	NA	NA	NA	NA	0.307031	0.00342481	NA	NA	0.0131158	0.0759969	NA	NA	NA	NA	NA	NA	0.224878	0.0144918	0.334267	0.0184244	NA	NA	NA	NA	NA	NA	NA	NA	0.00713153	0.759699	NA	NA	NA	NA	NA	NA	NA	NA	NA	NA	NA	NA	NA	NA	NA	NA	NA
GO_CIRCADIAN_REGULATION_OF_GENE_EXPRESSION	NA	NA	NA	NA	NA	0.00255713	NA	NA	NA	NA	NA	NA	0.0253143	0.0843949	NA	NA	NA	NA	NA	NA	NA	NA	NA	NA	NA	NA	NA	NA	NA	NA	NA	NA	NA	NA	NA	NA	0.0230203	0.453851	NA	NA	NA	NA	NA	NA	0.184174	0.0117154	NA	NA	NA
GO_CIRCADIAN_RHYTHM	NA	NA	NA	NA	0.929204	0.0135947	0.466653	0.0198097	0.192261	0.00508323	NA	NA	NA	NA	NA	NA	NA	NA	NA	NA	NA	NA	NA	NA	NA	NA	NA	NA	NA	NA	NA	NA	NA	NA	NA	NA	NA	NA	NA	NA	0.0198097	0.645103	NA	NA	NA	NA	NA	NA	NA
GO_CIS_GOLGI_NETWORK	NA	NA	NA	NA	NA	NA	NA	NA	NA	NA	NA	NA	NA	NA	NA	NA	NA	NA	0.0107349	NA	NA	NA	NA	NA	0.00221236	NA	NA	NA	NA	NA	0.561737	0.032953	NA	NA	NA	NA	NA	NA	NA	NA	NA	NA	NA	NA	0.00956785	NA	NA	NA	NA
GO_CLATHRIN_ADAPTOR_COMPLEX	NA	NA	NA	NA	NA	NA	NA	NA	NA	NA	NA	0.0222582	0.0242428	NA	NA	NA	NA	NA	NA	NA	0.0488291	NA	0.00100355	0.167389	NA	NA	NA	NA	NA	NA	NA	NA	NA	NA	NA	NA	NA	NA	NA	0.00793814	NA	NA	0.0350728	NA	0.25785	0.0435421	NA	NA	NA
GO_CLATHRIN_BINDING	NA	NA	NA	NA	NA	NA	NA	NA	NA	NA	NA	0.0242892	0.0268096	0.652547	NA	NA	0.280401	0.0323511	NA	NA	NA	NA	NA	NA	NA	NA	NA	NA	NA	NA	NA	NA	NA	NA	NA	NA	NA	NA	0.0405896	0.0505867	NA	NA	0.0452313	NA	NA	NA	NA	NA	NA
GO_CLATHRIN_COAT	NA	NA	NA	NA	NA	NA	NA	NA	NA	NA	NA	0.00885863	0.0282597	0.161474	NA	NA	0.51469	0.0494251	NA	NA	NA	NA	0.000487808	0.286271	NA	NA	NA	NA	NA	NA	NA	NA	NA	NA	NA	NA	NA	NA	NA	0.0254578	0.0335692	0.505202	0.0171474	NA	0.42247	0.0234179	NA	NA	NA
GO_CLATHRIN_COAT_ASSEMBLY	NA	NA	NA	NA	NA	NA	NA	NA	NA	NA	NA	NA	0.00979165	NA	0.0357233	NA	0.24625	0.00383347	NA	NA	NA	NA	NA	NA	NA	NA	NA	NA	NA	NA	NA	NA	NA	NA	NA	NA	NA	NA	NA	NA	NA	NA	NA	NA	NA	NA	NA	NA	NA
GO_CLATHRIN_COAT_OF_COATED_PIT	NA	NA	NA	NA	NA	NA	NA	NA	NA	NA	NA	NA	0.00697496	NA	NA	NA	0.222188	0.0326791	NA	NA	NA	NA	NA	NA	NA	NA	NA	NA	NA	NA	NA	NA	NA	NA	NA	NA	NA	NA	NA	NA	0.00173482	NA	0.0150393	NA	NA	NA	NA	NA	NA
GO_CLATHRIN_COAT_OF_ENDOCYTIC_VESICLE	NA	NA	NA	NA	NA	NA	NA	NA	NA	NA	NA	NA	0.0353922	0.172267	NA	NA	0.171744	0.0188398	NA	NA	NA	NA	NA	NA	NA	NA	NA	NA	NA	NA	NA	NA	NA	NA	NA	NA	NA	NA	NA	NA	0.0140346	NA	NA	NA	NA	NA	NA	NA	NA
GO_CLATHRIN_COATED_ENDOCYTIC_VESICLE	NA	NA	NA	NA	NA	NA	NA	NA	NA	NA	NA	NA	0.0163383	0.605725	NA	NA	NA	NA	NA	NA	NA	NA	NA	NA	NA	NA	NA	NA	NA	NA	NA	NA	NA	NA	NA	NA	NA	NA	NA	NA	NA	NA	NA	NA	NA	NA	NA	NA	NA
GO_CLATHRIN_COATED_PIT	NA	NA	NA	NA	NA	NA	NA	NA	NA	NA	NA	NA	0.00893961	0.0997425	NA	NA	0.0990008	3.96221e-05	NA	NA	NA	NA	NA	NA	NA	NA	NA	NA	NA	NA	NA	NA	NA	NA	NA	NA	NA	NA	NA	NA	NA	NA	NA	NA	NA	NA	0.0335278	0.663934	NA
GO_CLATHRIN_COATED_VESICLE_MEMBRANE	NA	NA	NA	NA	NA	NA	NA	NA	NA	NA	NA	NA	NA	NA	NA	NA	NA	NA	NA	NA	NA	NA	NA	NA	NA	NA	NA	NA	NA	NA	NA	NA	NA	NA	NA	NA	NA	NA	NA	0.0258801	NA	NA	NA	NA	NA	NA	NA	NA	NA
GO_CLATHRIN_DEPENDENT_ENDOCYTOSIS	NA	NA	NA	NA	NA	NA	NA	NA	NA	NA	NA	NA	0.00530446	0.50816	0.0391901	NA	NA	NA	NA	NA	NA	NA	NA	NA	NA	NA	NA	NA	NA	NA	NA	NA	NA	NA	NA	NA	NA	NA	NA	NA	NA	NA	NA	NA	NA	NA	NA	NA	NA
GO_CLATHRIN_VESICLE_COAT	NA	NA	NA	NA	NA	NA	NA	NA	NA	NA	NA	NA	0.0357842	0.0749796	NA	NA	0.365921	0.0148457	NA	NA	NA	NA	0.00155759	0.191457	NA	NA	NA	NA	NA	NA	NA	NA	NA	NA	NA	NA	NA	NA	NA	NA	NA	NA	0.04603	NA	NA	0.00665041	NA	NA	NA
GO_CLEAVAGE_FURROW	NA	NA	0.148641	0.030766	NA	NA	NA	NA	NA	NA	NA	NA	0.396337	0.0100182	NA	NA	NA	NA	NA	NA	NA	NA	NA	NA	NA	NA	NA	NA	NA	NA	NA	NA	NA	NA	NA	NA	NA	NA	NA	NA	NA	NA	NA	NA	NA	NA	NA	NA	NA
GO_CLUSTER_OF_ACTIN_BASED_CELL_PROJECTIONS	NA	NA	NA	NA	NA	NA	NA	NA	NA	NA	NA	NA	NA	NA	NA	NA	NA	NA	0.032836	0.622051	0.394797	0.0231155	NA	NA	NA	NA	NA	NA	NA	NA	NA	NA	NA	NA	NA	NA	NA	NA	NA	NA	NA	NA	NA	NA	NA	NA	NA	NA	NA
GO_CO_RECEPTOR_BINDING	NA	NA	NA	NA	NA	NA	NA	NA	0.0215316	NA	NA	NA	NA	NA	NA	NA	NA	NA	NA	NA	NA	NA	NA	NA	NA	NA	NA	NA	NA	NA	NA	NA	NA	NA	NA	NA	NA	NA	NA	NA	NA	NA	NA	NA	NA	NA	NA	NA	NA
GO_CO_SMAD_BINDING	NA	NA	0.00964003	NA	NA	NA	NA	NA	NA	NA	NA	NA	NA	NA	NA	NA	NA	NA	NA	NA	NA	NA	NA	NA	NA	NA	NA	NA	NA	NA	NA	NA	NA	NA	NA	NA	NA	NA	NA	NA	NA	NA	NA	NA	NA	NA	NA	NA	NA
GO_COA_HYDROLASE_ACTIVITY	NA	NA	NA	NA	NA	NA	NA	NA	NA	NA	NA	NA	NA	NA	NA	NA	NA	NA	NA	NA	NA	NA	NA	NA	NA	NA	NA	NA	NA	NA	NA	0.0201031	NA	NA	NA	NA	NA	NA	NA	NA	NA	NA	NA	NA	NA	NA	NA	NA	NA
GO_COAGULATION	NA	NA	NA	NA	NA	NA	NA	NA	NA	NA	NA	NA	NA	NA	NA	NA	NA	NA	NA	NA	NA	NA	0.303209	0.0430143	NA	NA	NA	NA	NA	NA	NA	NA	NA	NA	NA	NA	NA	NA	NA	NA	0.0196371	0.778285	0.920959	0.0135798	NA	NA	NA	NA	NA
GO_COATED_VESICLE	NA	NA	NA	NA	NA	NA	NA	NA	NA	NA	NA	NA	NA	NA	NA	NA	0.687654	0.0443758	NA	NA	NA	NA	NA	NA	NA	NA	NA	NA	NA	NA	NA	NA	NA	NA	NA	NA	NA	NA	NA	NA	NA	NA	NA	NA	0.145419	0.0480835	NA	NA	NA
GO_COATED_VESICLE_MEMBRANE	NA	NA	NA	NA	NA	NA	NA	NA	NA	NA	NA	NA	NA	NA	NA	NA	NA	NA	NA	NA	NA	NA	NA	NA	NA	NA	NA	NA	NA	NA	NA	NA	NA	NA	NA	NA	NA	NA	NA	0.0171884	NA	NA	NA	NA	0.640793	0.0364965	NA	NA	NA
GO_COBALAMIN_METABOLIC_PROCESS	NA	NA	NA	NA	NA	NA	NA	NA	NA	NA	NA	NA	NA	NA	NA	NA	0.0455111	0.328902	NA	NA	NA	NA	NA	NA	NA	NA	NA	NA	NA	NA	0.0269716	NA	NA	NA	0.020495	NA	NA	NA	NA	NA	NA	NA	NA	NA	NA	NA	NA	NA	NA
GO_COENZYME_A_METABOLIC_PROCESS	NA	NA	NA	NA	NA	NA	NA	NA	NA	NA	NA	NA	NA	NA	NA	NA	NA	NA	NA	NA	NA	NA	NA	NA	NA	NA	0.0123938	NA	0.0240345	0.134407	NA	NA	NA	NA	NA	NA	NA	NA	NA	NA	NA	NA	NA	NA	NA	NA	NA	NA	NA
GO_COGNITION	NA	NA	NA	NA	NA	NA	NA	NA	NA	NA	NA	NA	NA	NA	NA	NA	NA	NA	NA	NA	NA	NA	NA	NA	NA	NA	NA	NA	NA	NA	NA	NA	NA	NA	NA	NA	NA	NA	NA	NA	NA	NA	NA	NA	NA	NA	NA	NA	NA
GO_COHESIN_COMPLEX	NA	NA	NA	NA	NA	NA	NA	NA	NA	NA	NA	NA	NA	NA	NA	NA	0.0222109	NA	0.0322421	NA	NA	NA	NA	NA	NA	NA	NA	NA	NA	NA	NA	NA	NA	NA	NA	NA	NA	NA	NA	NA	NA	NA	NA	NA	NA	NA	NA	NA	NA
GO_COLLAGEN_ACTIVATED_SIGNALING_PATHWAY	NA	NA	NA	NA	NA	NA	NA	NA	NA	NA	NA	NA	NA	NA	NA	NA	0.0222109	NA	NA	NA	NA	NA	NA	NA	NA	NA	NA	NA	NA	NA	NA	NA	NA	NA	NA	NA	NA	NA	NA	NA	0.0216622	NA	NA	NA	NA	NA	NA	NA	NA
GO_COLLAGEN_ACTIVATED_TYROSINE_KINASE_RECEPTOR_SIGNALING_PATHWAY	NA	NA	NA	NA	NA	NA	NA	NA	NA	NA	NA	NA	NA	NA	NA	NA	0.014396	NA	NA	NA	NA	NA	NA	NA	NA	NA	NA	NA	NA	NA	NA	NA	NA	NA	NA	NA	NA	NA	NA	NA	NA	NA	NA	NA	NA	NA	NA	NA	NA
GO_COLLAGEN_BINDING	0.447884	0.000615093	0.589779	0.0118645	NA	NA	0.679455	0.0227013	NA	NA	NA	NA	NA	NA	0.0063082	0.185608	0.0047009	0.131246	NA	NA	0.0176675	0.379348	NA	NA	NA	NA	0.190837	0.000530359	NA	NA	0.1974	0.032953	0.0338219	0.505334	0.508947	0.0234618	NA	0.026051	0.00453981	0.31505	NA	NA	NA	NA	0.0503878	0.0143039	NA	NA	NA
GO_COLLAGEN_BIOSYNTHETIC_PROCESS	NA	NA	NA	NA	NA	NA	NA	NA	NA	NA	NA	NA	NA	NA	NA	NA	NA	NA	NA	NA	NA	NA	NA	NA	NA	NA	NA	NA	NA	NA	NA	NA	NA	NA	NA	NA	NA	NA	NA	NA	NA	NA	NA	NA	NA	0.0337799	0.600242	0.0467641	NA
GO_COLLAGEN_CATABOLIC_PROCESS	NA	0.0279275	NA	NA	NA	NA	0.533943	0.0354624	NA	NA	NA	NA	NA	NA	NA	NA	NA	NA	NA	NA	NA	NA	0.0062262	0.291491	NA	NA	NA	NA	NA	NA	NA	NA	NA	NA	NA	NA	NA	NA	NA	NA	NA	NA	0.0181598	0.399039	NA	NA	NA	NA	NA
GO_COLLAGEN_CONTAINING_EXTRACELLULAR_MATRIX	0.878374	0.00963383	NA	NA	NA	NA	0.0214642	0.788499	NA	NA	0.00825141	0.759871	NA	NA	NA	NA	NA	NA	0.0350432	0.992173	NA	NA	NA	NA	NA	NA	0.541442	0.0207711	0.0229971	0.226357	NA	NA	NA	NA	NA	NA	0.00635159	0.349085	NA	NA	NA	NA	NA	NA	NA	NA	NA	NA	NA
GO_COLLAGEN_FIBRIL_ORGANIZATION	NA	NA	NA	NA	NA	NA	NA	NA	NA	NA	NA	NA	NA	NA	NA	NA	NA	NA	NA	NA	NA	NA	NA	NA	NA	NA	NA	NA	NA	NA	NA	NA	NA	NA	NA	NA	NA	NA	0.231128	0.0354079	NA	NA	NA	NA	NA	NA	NA	NA	NA
GO_COLLAGEN_METABOLIC_PROCESS	NA	0.0249083	NA	NA	NA	NA	NA	NA	NA	NA	0.130391	0.0209988	NA	NA	NA	NA	NA	NA	NA	NA	NA	NA	0.0127723	0.563914	NA	NA	NA	NA	NA	NA	NA	NA	NA	NA	NA	NA	NA	NA	NA	NA	NA	NA	NA	NA	NA	NA	NA	NA	NA
GO_COLLAGEN_TRIMER	NA	NA	NA	NA	NA	NA	NA	NA	NA	NA	0.0159303	NA	NA	NA	NA	NA	NA	NA	NA	NA	NA	NA	NA	NA	NA	NA	NA	NA	0.0137222	NA	NA	NA	NA	NA	NA	NA	NA	NA	NA	NA	NA	NA	NA	NA	NA	NA	NA	NA	NA
GO_COLLATERAL_SPROUTING	NA	NA	NA	NA	NA	NA	NA	NA	NA	NA	NA	NA	NA	0.00837373	NA	NA	NA	NA	NA	NA	NA	NA	NA	NA	NA	NA	NA	NA	NA	NA	NA	NA	NA	NA	NA	NA	NA	NA	NA	NA	NA	NA	NA	NA	NA	NA	NA	NA	NA
GO_COLUMNAR_CUBOIDAL_EPITHELIAL_CELL_DEVELOPMENT	NA	NA	NA	NA	NA	NA	NA	NA	NA	NA	NA	NA	NA	NA	NA	NA	NA	NA	NA	NA	NA	NA	NA	NA	NA	NA	NA	NA	NA	NA	NA	NA	NA	NA	NA	NA	NA	NA	NA	NA	NA	NA	NA	NA	0.0403533	0.577517	NA	NA	NA
GO_COLUMNAR_CUBOIDAL_EPITHELIAL_CELL_DIFFERENTIATION	NA	NA	NA	NA	NA	NA	NA	NA	NA	NA	NA	NA	NA	NA	NA	NA	NA	NA	NA	NA	NA	NA	NA	NA	NA	NA	NA	NA	NA	NA	NA	NA	NA	NA	NA	NA	NA	NA	NA	NA	NA	NA	NA	NA	0.0146659	0.804346	NA	NA	NA
GO_COMMISSURAL_NEURON_AXON_GUIDANCE	0.0966764	0.00193324	0.00964003	0.14146	NA	NA	0.176955	0.0140346	NA	0.0128885	NA	NA	0.0353922	0.172267	NA	NA	NA	NA	NA	NA	0.0121207	0.0784016	NA	NA	NA	NA	NA	NA	NA	NA	0.00831893	0.113507	NA	NA	NA	NA	0.0052403	0.104005	NA	NA	NA	0.0136773	NA	NA	NA	0.0107285	NA	NA	NA
GO_COMPACT_MYELIN	NA	NA	NA	NA	NA	NA	NA	NA	NA	NA	NA	NA	NA	NA	0.210263	0.0104503	NA	NA	0.0282936	NA	NA	NA	NA	NA	NA	NA	NA	NA	NA	NA	NA	NA	NA	NA	NA	NA	NA	NA	NA	NA	NA	NA	NA	NA	NA	NA	0.214907	0.0186052	NA
GO_COMPLEMENT_ACTIVATION_LECTIN_PATHWAY	NA	NA	NA	NA	NA	NA	NA	NA	NA	NA	NA	NA	NA	NA	NA	NA	0.014396	NA	NA	NA	NA	NA	NA	NA	NA	NA	NA	NA	NA	NA	NA	NA	NA	NA	NA	NA	NA	NA	NA	NA	NA	NA	NA	NA	NA	NA	NA	NA	NA
GO_COMPLEX_OF_COLLAGEN_TRIMERS	NA	NA	NA	NA	NA	NA	NA	NA	NA	NA	NA	NA	NA	NA	NA	NA	NA	NA	NA	NA	NA	NA	NA	NA	NA	NA	NA	NA	0.00454867	NA	NA	NA	NA	NA	NA	NA	NA	NA	NA	NA	NA	NA	NA	NA	NA	NA	NA	NA	NA
GO_CONDENSED_CHROMOSOME_CENTROMERIC_REGION	NA	NA	NA	NA	NA	NA	NA	NA	NA	NA	NA	NA	NA	NA	0.0167276	0.398868	NA	NA	NA	NA	NA	NA	NA	NA	NA	NA	NA	NA	NA	NA	NA	NA	NA	NA	NA	NA	NA	NA	NA	NA	NA	NA	NA	NA	NA	NA	NA	NA	NA
GO_CONDENSED_NUCLEAR_CHROMOSOME	NA	NA	NA	NA	NA	NA	NA	NA	NA	NA	NA	NA	NA	NA	NA	NA	NA	NA	NA	NA	NA	NA	NA	0.0396541	0.01431	NA	NA	NA	NA	NA	NA	NA	NA	NA	NA	NA	NA	NA	NA	NA	NA	NA	NA	NA	NA	NA	NA	NA	0.043236
GO_CONDENSED_NUCLEAR_CHROMOSOME_CENTROMERIC_REGION	NA	NA	NA	NA	NA	NA	NA	NA	NA	NA	NA	NA	NA	NA	NA	NA	NA	NA	NA	NA	NA	NA	NA	NA	0.022908	NA	NA	NA	NA	NA	NA	NA	NA	NA	NA	NA	NA	NA	NA	NA	NA	NA	NA	NA	NA	NA	NA	NA	NA
GO_CONDENSED_NUCLEAR_CHROMOSOME_KINETOCHORE	NA	NA	NA	NA	NA	NA	NA	NA	0.0358379	NA	NA	NA	NA	NA	NA	NA	NA	NA	NA	NA	NA	NA	NA	NA	0.0411379	NA	NA	NA	NA	NA	NA	NA	NA	NA	NA	NA	NA	NA	NA	NA	NA	NA	NA	NA	NA	NA	NA	NA	NA
GO_CONTRACTILE_FIBER	NA	NA	0.0318796	0.952307	NA	NA	0.000134842	0.498909	NA	NA	NA	NA	NA	NA	NA	NA	0.168286	0.00396805	0.301267	0.0224559	NA	NA	NA	NA	NA	NA	NA	NA	0.0018467	0.194648	NA	NA	NA	NA	0.695323	0.0184463	NA	NA	0.0270083	0.137022	NA	NA	NA	NA	NA	NA	0.00086489	0.296505	NA
GO_CONTRACTILE_RING	NA	NA	NA	NA	NA	NA	NA	NA	NA	NA	NA	NA	NA	NA	NA	NA	NA	NA	NA	NA	NA	NA	NA	NA	NA	NA	NA	NA	NA	NA	NA	NA	NA	NA	NA	NA	NA	NA	NA	NA	NA	0.0095135	NA	NA	NA	NA	NA	NA	NA
GO_COP9_SIGNALOSOME	NA	0.0169277	NA	NA	NA	NA	0.0199207	NA	NA	NA	NA	NA	NA	NA	NA	NA	NA	NA	NA	NA	NA	NA	NA	NA	NA	NA	NA	NA	NA	NA	NA	NA	NA	NA	NA	NA	NA	NA	NA	NA	NA	NA	NA	NA	NA	NA	NA	NA	NA
GO_COPI_COATED_VESICLE	NA	NA	NA	NA	NA	NA	NA	NA	NA	NA	NA	NA	NA	NA	NA	NA	NA	NA	NA	NA	NA	NA	NA	NA	NA	NA	NA	NA	NA	NA	NA	NA	NA	NA	NA	NA	NA	NA	NA	NA	NA	NA	NA	NA	NA	NA	NA	NA	0.018844
GO_COPII_COATED_VESICLE_BUDDING	NA	NA	NA	NA	NA	NA	NA	NA	NA	NA	NA	NA	NA	NA	NA	NA	NA	NA	NA	NA	NA	NA	NA	NA	NA	NA	NA	NA	0.0310324	NA	NA	NA	NA	NA	NA	NA	NA	NA	NA	NA	NA	NA	NA	NA	NA	NA	0.0083097	0.305215	NA
GO_COPII_COATED_VESICLE_CARGO_LOADING	NA	NA	NA	NA	NA	NA	NA	NA	NA	NA	NA	NA	NA	NA	NA	NA	NA	NA	NA	NA	NA	NA	NA	NA	NA	NA	NA	NA	NA	NA	NA	NA	NA	NA	NA	NA	0.00818709	0.12828	NA	NA	NA	NA	NA	NA	NA	NA	0.0265101	NA	NA
GO_COPII_VESICLE_COAT	NA	NA	NA	NA	NA	NA	NA	NA	NA	NA	NA	NA	NA	NA	NA	NA	NA	NA	NA	NA	NA	NA	NA	NA	NA	NA	NA	NA	NA	NA	NA	NA	NA	NA	NA	NA	0.00818709	0.12828	NA	NA	NA	NA	NA	NA	NA	NA	0.0265101	NA	NA
GO_COPPER_ION_BINDING	NA	NA	NA	NA	NA	NA	NA	NA	NA	NA	NA	NA	NA	NA	NA	NA	NA	NA	NA	NA	NA	NA	NA	NA	NA	NA	NA	NA	NA	NA	NA	NA	NA	NA	NA	NA	NA	NA	NA	NA	NA	NA	NA	NA	NA	NA	NA	NA	NA
GO_COPPER_ION_HOMEOSTASIS	NA	NA	NA	NA	NA	NA	NA	NA	NA	NA	NA	NA	NA	NA	NA	NA	NA	NA	NA	NA	NA	NA	NA	NA	0.0411379	NA	NA	NA	NA	NA	NA	NA	NA	NA	NA	NA	NA	NA	NA	NA	NA	NA	NA	NA	NA	NA	NA	NA	NA
GO_COPPER_ION_TRANSPORT	NA	NA	NA	NA	NA	NA	NA	NA	NA	NA	NA	NA	NA	NA	NA	NA	NA	NA	NA	NA	NA	NA	NA	NA	NA	NA	NA	NA	NA	NA	NA	NA	NA	NA	0.013937	NA	NA	NA	NA	NA	NA	NA	NA	NA	NA	NA	NA	NA	NA
GO_CORE_PROMOTER_SEQUENCE_SPECIFIC_DNA_BINDING	NA	NA	NA	NA	NA	NA	0.169048	0.00537222	NA	NA	NA	NA	NA	NA	NA	NA	NA	NA	NA	NA	NA	NA	NA	NA	NA	NA	NA	NA	NA	NA	NA	0.0108641	NA	NA	NA	NA	NA	NA	NA	NA	NA	NA	NA	NA	0.0171474	0.461511	NA	NA	NA
GO_CORECEPTOR_ACTIVITY	NA	NA	NA	NA	NA	NA	NA	NA	NA	NA	NA	NA	NA	NA	NA	NA	NA	NA	NA	NA	NA	NA	NA	NA	NA	NA	NA	NA	NA	NA	NA	NA	NA	NA	NA	NA	NA	NA	NA	NA	NA	NA	NA	NA	NA	NA	NA	NA	NA
GO_CORONARY_VASCULATURE_DEVELOPMENT	NA	NA	NA	NA	NA	NA	NA	NA	NA	NA	NA	NA	NA	NA	NA	NA	NA	NA	NA	NA	NA	NA	NA	NA	NA	NA	NA	NA	NA	NA	NA	NA	NA	NA	NA	NA	NA	NA	NA	0.0308234	NA	NA	NA	NA	0.022536	0.496595	NA	NA	NA
GO_CORONARY_VASCULATURE_MORPHOGENESIS	NA	NA	NA	NA	NA	NA	NA	NA	NA	NA	NA	NA	NA	NA	NA	NA	NA	NA	NA	NA	NA	NA	NA	NA	0.0457066	NA	NA	NA	NA	NA	0.190905	0.0136668	NA	NA	NA	NA	NA	NA	NA	NA	NA	NA	NA	NA	NA	NA	NA	NA	NA
GO_CORPUS_CALLOSUM_DEVELOPMENT	NA	NA	NA	NA	NA	NA	NA	NA	NA	NA	NA	NA	NA	NA	NA	NA	NA	NA	NA	NA	NA	NA	NA	NA	NA	NA	NA	NA	NA	NA	NA	NA	NA	NA	NA	NA	NA	NA	NA	NA	NA	NA	NA	NA	0.0230858	NA	NA	NA	NA
GO_CORTICAL_ACTIN_CYTOSKELETON	NA	NA	NA	NA	NA	NA	0.0401453	0.125281	NA	NA	NA	NA	0.143093	0.0366683	NA	NA	NA	NA	NA	NA	NA	NA	NA	NA	NA	NA	NA	NA	0.141182	0.0414798	NA	NA	NA	NA	0.0472295	0.154983	NA	NA	NA	NA	NA	NA	NA	NA	NA	NA	NA	NA	NA
GO_CORTICAL_ACTIN_CYTOSKELETON_ORGANIZATION	NA	0.0196977	NA	NA	NA	NA	NA	NA	NA	0.0194381	NA	NA	NA	NA	NA	NA	NA	NA	NA	NA	NA	NA	NA	NA	NA	NA	NA	NA	NA	NA	NA	NA	NA	NA	NA	NA	0.0500526	0.0490534	NA	NA	NA	NA	NA	NA	NA	0.0150882	NA	NA	NA
GO_CORTICAL_CYTOSKELETON	NA	NA	0.740912	0.0454379	NA	NA	0.0284068	0.223148	NA	NA	0.030283	0.628094	NA	NA	0.261107	0.0316388	0.228917	0.0423434	0.144	0.0200707	NA	NA	NA	NA	NA	NA	NA	NA	0.247854	0.00354019	NA	NA	NA	NA	0.0225075	0.237201	NA	NA	NA	NA	NA	NA	NA	NA	NA	NA	NA	NA	NA
GO_CORTICAL_CYTOSKELETON_ORGANIZATION	NA	0.0436651	NA	NA	NA	NA	NA	NA	NA	NA	NA	NA	NA	NA	NA	NA	NA	NA	NA	NA	NA	NA	NA	NA	NA	NA	NA	NA	NA	NA	NA	NA	NA	NA	NA	NA	NA	NA	NA	NA	NA	NA	NA	NA	0.511464	0.0461396	NA	NA	NA
GO_CORTICOSTEROID_RECEPTOR_SIGNALING_PATHWAY	NA	NA	NA	NA	NA	NA	0.0206774	NA	NA	0.0174307	NA	NA	0.0472148	NA	NA	NA	NA	NA	NA	NA	NA	NA	NA	NA	0.0285789	NA	NA	NA	NA	NA	NA	NA	NA	NA	NA	NA	NA	NA	NA	NA	NA	NA	NA	NA	NA	NA	NA	NA	NA
GO_COSTAMERE	NA	NA	NA	NA	NA	NA	0.00330391	0.255029	NA	NA	NA	NA	0.384411	0.0349406	0.00367515	0.193183	NA	0.00449226	NA	NA	0.0294203	NA	NA	NA	NA	NA	NA	NA	0.00021856	NA	NA	NA	0.0154742	0.1737	NA	NA	NA	NA	NA	NA	NA	NA	NA	NA	NA	NA	0.00026729	NA	NA
GO_COVALENT_CHROMATIN_MODIFICATION	NA	NA	0.00838305	0.263655	NA	NA	NA	NA	NA	NA	NA	NA	NA	NA	0.285709	0.0031866	NA	NA	NA	NA	2.00062e-05	0.228079	NA	NA	NA	NA	NA	NA	0.161894	0.0423726	NA	NA	NA	NA	NA	NA	0.0138895	0.641323	NA	NA	0.000495814	0.307813	NA	NA	0.000210729	0.0588927	NA	NA	NA
GO_CRISTAE_FORMATION	NA	NA	NA	NA	NA	NA	NA	NA	NA	NA	NA	NA	NA	NA	NA	NA	NA	NA	0.143017	0.0327178	NA	NA	NA	NA	NA	NA	NA	NA	NA	NA	NA	NA	NA	NA	NA	NA	NA	NA	NA	NA	NA	NA	NA	NA	NA	NA	NA	NA	NA
GO_CUL3_RING_UBIQUITIN_LIGASE_COMPLEX	NA	NA	NA	NA	0.0692617	0.0146757	NA	NA	NA	0.0156815	NA	NA	NA	NA	NA	NA	NA	NA	NA	NA	NA	NA	NA	NA	NA	0.0424457	NA	NA	NA	NA	NA	NA	NA	NA	0.306107	0.0394438	NA	NA	NA	NA	NA	NA	NA	NA	NA	NA	NA	NA	NA
GO_CUL4_RING_E3_UBIQUITIN_LIGASE_COMPLEX	NA	NA	NA	NA	NA	NA	NA	NA	NA	NA	NA	0.0415746	NA	NA	NA	NA	NA	NA	NA	NA	NA	NA	NA	NA	NA	NA	NA	NA	NA	NA	NA	NA	NA	NA	NA	NA	NA	NA	NA	NA	NA	NA	NA	NA	NA	NA	NA	NA	NA
GO_CULLIN_RING_UBIQUITIN_LIGASE_COMPLEX	0.157157	0.0125984	NA	NA	0.581544	0.0295071	NA	NA	0.550988	0.0027757	NA	NA	NA	NA	NA	NA	NA	NA	NA	NA	NA	NA	NA	NA	NA	NA	NA	NA	0.016859	0.460669	NA	NA	0.0243829	0.0795097	0.488064	0.0140329	NA	NA	NA	NA	NA	NA	NA	NA	NA	NA	NA	NA	NA
GO_CXCR_CHEMOKINE_RECEPTOR_BINDING	NA	NA	NA	NA	NA	NA	NA	NA	NA	NA	NA	NA	NA	NA	NA	NA	NA	NA	0.0452625	NA	NA	NA	NA	NA	NA	NA	NA	NA	NA	NA	NA	NA	NA	NA	NA	NA	NA	NA	NA	NA	NA	NA	NA	NA	NA	NA	NA	NA	NA
GO_CYCLASE_ACTIVITY	NA	NA	0.0310655	NA	NA	NA	0.00506717	NA	NA	NA	NA	NA	NA	NA	NA	NA	NA	NA	NA	NA	NA	NA	NA	NA	NA	NA	NA	NA	NA	0.0185682	NA	NA	NA	NA	NA	NA	NA	0.0169046	NA	NA	NA	NA	NA	NA	NA	NA	NA	NA	NA
GO_CYCLIC_NUCLEOTIDE_BINDING	NA	NA	NA	NA	NA	NA	0.0214262	NA	NA	NA	NA	NA	NA	NA	NA	NA	NA	NA	NA	NA	NA	NA	NA	NA	NA	NA	NA	NA	NA	NA	NA	NA	NA	NA	NA	NA	NA	NA	NA	NA	NA	NA	NA	NA	NA	NA	NA	NA	NA
GO_CYCLIC_NUCLEOTIDE_BIOSYNTHETIC_PROCESS	NA	NA	0.0310655	NA	NA	NA	NA	NA	NA	NA	NA	NA	NA	NA	NA	NA	NA	NA	NA	NA	NA	NA	NA	NA	NA	NA	NA	NA	NA	0.0185682	NA	NA	NA	NA	NA	NA	NA	NA	NA	NA	NA	NA	NA	NA	NA	NA	NA	NA	NA
GO_CYCLIC_NUCLEOTIDE_CATABOLIC_PROCESS	NA	NA	NA	NA	NA	NA	0.0206774	0.194994	NA	0.0174307	NA	NA	0.0472148	NA	0.0221965	0.146277	NA	NA	NA	NA	NA	NA	NA	NA	NA	NA	NA	NA	NA	NA	NA	NA	NA	NA	NA	NA	NA	NA	NA	NA	NA	NA	NA	NA	NA	NA	NA	NA	NA
GO_CYCLIC_NUCLEOTIDE_METABOLIC_PROCESS	NA	NA	NA	NA	NA	NA	0.026306	0.462137	NA	NA	NA	NA	NA	NA	0.0289863	0.0741316	NA	NA	NA	NA	NA	NA	NA	NA	NA	NA	NA	NA	NA	NA	NA	NA	NA	NA	NA	NA	NA	NA	NA	NA	NA	NA	NA	NA	NA	NA	NA	NA	NA
GO_CYCLIN_BINDING	NA	NA	NA	NA	NA	NA	NA	NA	NA	NA	NA	NA	NA	NA	NA	NA	NA	NA	NA	NA	NA	NA	NA	NA	NA	NA	NA	NA	NA	NA	NA	NA	NA	NA	NA	NA	0.0309983	NA	NA	NA	NA	NA	NA	NA	NA	NA	NA	NA	NA
GO_CYCLIN_DEPENDENT_PROTEIN_KINASE_ACTIVITY	NA	NA	NA	NA	0.0471172	NA	NA	NA	NA	NA	NA	NA	NA	NA	NA	NA	NA	NA	0.0173485	0.4449	NA	NA	NA	NA	NA	NA	NA	NA	NA	0.0312443	NA	NA	NA	NA	0.254967	0.0264461	NA	NA	NA	NA	NA	NA	NA	NA	NA	NA	NA	NA	NA
GO_CYCLIN_DEPENDENT_PROTEIN_SERINE_THREONINE_KINASE_INHIBITOR_ACTIVITY	NA	NA	NA	NA	NA	NA	NA	NA	NA	NA	NA	NA	NA	NA	NA	NA	NA	NA	NA	NA	NA	NA	NA	NA	0.0212549	0.104005	NA	NA	NA	NA	NA	NA	NA	NA	NA	NA	NA	NA	NA	NA	NA	NA	NA	NA	NA	NA	NA	NA	NA
GO_CYCLIN_DEPENDENT_PROTEIN_SERINE_THREONINE_KINASE_REGULATOR_ACTIVITY	NA	NA	NA	NA	NA	NA	NA	NA	NA	0.0370853	NA	NA	NA	NA	NA	NA	NA	NA	NA	NA	NA	NA	NA	NA	NA	NA	NA	NA	NA	NA	NA	NA	NA	NA	0.0140067	NA	NA	NA	NA	NA	NA	NA	NA	NA	NA	NA	NA	NA	NA
GO_CYCLOSPORIN_A_BINDING	NA	NA	NA	NA	NA	NA	NA	NA	NA	NA	NA	NA	NA	0.0384299	0.0434073	0.202251	NA	NA	NA	NA	NA	NA	NA	NA	NA	NA	NA	NA	NA	NA	NA	NA	NA	NA	NA	NA	NA	NA	NA	NA	NA	NA	NA	NA	NA	NA	NA	NA	NA
GO_CYSTEINE_METABOLIC_PROCESS	NA	NA	NA	NA	NA	NA	NA	NA	NA	NA	NA	NA	NA	NA	NA	NA	NA	NA	NA	NA	NA	NA	NA	NA	NA	0.0051264	NA	NA	0.0155985	NA	NA	NA	NA	NA	NA	NA	NA	NA	NA	NA	NA	NA	NA	NA	NA	NA	NA	NA	NA
GO_CYSTEINE_TYPE_ENDOPEPTIDASE_ACTIVITY	0.249986	0.025481	0.766091	0.000614015	NA	NA	NA	NA	0.603542	0.00678962	NA	NA	NA	NA	NA	NA	NA	NA	NA	NA	0.0799429	0.00107863	NA	NA	0.175205	0.00390871	NA	NA	NA	NA	0.0449486	0.68261	NA	NA	NA	NA	0.00410045	0.0860778	NA	NA	NA	NA	0.000420876	0.347784	0.0115681	0.195497	NA	NA	NA
GO_CYSTEINE_TYPE_ENDOPEPTIDASE_ACTIVITY_INVOLVED_IN_APOPTOTIC_PROCESS	NA	NA	NA	0.000808558	NA	NA	NA	NA	NA	NA	NA	NA	NA	NA	NA	NA	NA	NA	NA	NA	NA	NA	NA	NA	NA	NA	NA	NA	NA	NA	0.0129333	0.13982	NA	NA	NA	NA	NA	NA	NA	NA	NA	NA	NA	NA	NA	NA	NA	NA	NA
GO_CYSTEINE_TYPE_ENDOPEPTIDASE_ACTIVITY_INVOLVED_IN_APOPTOTIC_SIGNALING_PATHWAY	NA	NA	NA	0.00022345	NA	NA	NA	NA	NA	NA	NA	NA	NA	NA	NA	NA	NA	NA	NA	NA	NA	NA	NA	NA	NA	NA	NA	NA	NA	NA	0.00575998	0.095521	NA	NA	NA	NA	NA	NA	NA	NA	NA	NA	NA	NA	NA	NA	NA	NA	NA
GO_CYSTEINE_TYPE_ENDOPEPTIDASE_INHIBITOR_ACTIVITY	NA	NA	NA	NA	NA	NA	NA	NA	NA	NA	NA	NA	NA	NA	NA	NA	NA	NA	NA	NA	NA	NA	NA	NA	NA	NA	NA	NA	NA	NA	NA	NA	NA	NA	NA	NA	NA	NA	NA	NA	NA	NA	NA	NA	NA	NA	NA	NA	NA
GO_CYSTEINE_TYPE_ENDOPEPTIDASE_INHIBITOR_ACTIVITY_INVOLVED_IN_APOPTOTIC_PROCESS	NA	NA	NA	NA	NA	NA	NA	NA	NA	NA	NA	NA	NA	NA	NA	NA	NA	NA	NA	NA	NA	NA	NA	NA	NA	NA	NA	NA	NA	NA	NA	NA	NA	NA	NA	NA	NA	NA	NA	NA	NA	NA	NA	NA	NA	NA	NA	NA	NA
GO_CYSTEINE_TYPE_ENDOPEPTIDASE_REGULATOR_ACTIVITY_INVOLVED_IN_APOPTOTIC_PROCESS	NA	NA	NA	NA	NA	NA	NA	NA	0.0405844	0.13145	NA	NA	NA	NA	NA	NA	NA	0.0417711	NA	NA	NA	0.00308206	NA	NA	NA	NA	NA	NA	NA	NA	NA	NA	NA	NA	NA	NA	NA	NA	NA	NA	NA	NA	NA	NA	NA	NA	NA	NA	NA
GO_CYSTEINE_TYPE_PEPTIDASE_ACTIVITY	0.327861	0.00747073	0.830106	0.000391655	NA	NA	NA	NA	0.709735	0.0169256	NA	NA	NA	NA	NA	NA	NA	NA	NA	NA	NA	NA	NA	NA	0.128774	0.00173321	NA	NA	0.00771013	0.384968	NA	NA	NA	NA	NA	NA	0.000307264	0.133743	NA	NA	NA	NA	0.00136108	0.189015	0.0250568	0.115844	NA	NA	NA
GO_CYTOCHROME_COMPLEX_ASSEMBLY	NA	NA	NA	NA	NA	NA	NA	NA	0.484818	0.0168835	NA	NA	NA	NA	NA	NA	NA	NA	NA	NA	NA	NA	NA	NA	NA	NA	NA	0.0478402	NA	NA	NA	NA	NA	NA	NA	NA	NA	NA	NA	0.016901	NA	NA	NA	NA	NA	NA	NA	NA	NA
GO_CYTOKINE_BINDING	NA	NA	NA	NA	NA	NA	NA	NA	NA	NA	NA	NA	NA	NA	NA	NA	NA	NA	NA	NA	NA	NA	NA	NA	NA	NA	NA	NA	NA	NA	0.469948	0.0465716	NA	NA	NA	NA	NA	NA	NA	NA	NA	NA	NA	NA	NA	NA	NA	NA	NA
GO_CYTOKINE_PRODUCTION_INVOLVED_IN_IMMUNE_RESPONSE	NA	NA	NA	NA	NA	NA	NA	NA	NA	NA	NA	NA	NA	NA	0.0304412	0.326205	NA	NA	NA	NA	NA	NA	NA	NA	NA	NA	NA	NA	NA	NA	NA	NA	NA	NA	NA	NA	NA	NA	NA	NA	NA	NA	NA	NA	NA	NA	NA	NA	NA
GO_CYTOKINE_PRODUCTION_INVOLVED_IN_INFLAMMATORY_RESPONSE	NA	NA	NA	NA	NA	NA	NA	NA	NA	NA	NA	0.0272059	NA	NA	NA	NA	NA	NA	0.0444774	NA	NA	NA	NA	NA	NA	NA	NA	NA	NA	NA	NA	NA	NA	NA	NA	NA	NA	NA	NA	NA	NA	NA	NA	NA	NA	NA	NA	NA	NA
GO_CYTOKINE_RECEPTOR_ACTIVITY	NA	NA	NA	NA	NA	NA	NA	NA	NA	NA	NA	NA	NA	NA	NA	NA	NA	NA	NA	NA	0.0498049	NA	NA	NA	NA	NA	NA	NA	NA	NA	NA	NA	NA	NA	NA	NA	NA	NA	NA	NA	NA	NA	NA	NA	NA	NA	NA	NA	NA
GO_CYTOKINE_SECRETION	NA	NA	NA	NA	NA	NA	NA	NA	NA	NA	NA	NA	NA	NA	NA	NA	0.0168132	0.418904	NA	NA	NA	NA	NA	NA	NA	NA	NA	NA	NA	NA	NA	NA	NA	NA	NA	NA	NA	NA	NA	NA	NA	NA	NA	NA	NA	NA	NA	NA	NA
GO_CYTOKINESIS	NA	NA	0.641609	0.00631282	NA	NA	NA	NA	NA	NA	NA	NA	0.267124	0.00157358	NA	NA	NA	NA	NA	NA	NA	NA	NA	NA	NA	NA	NA	NA	NA	NA	NA	NA	NA	NA	NA	NA	NA	NA	NA	NA	NA	NA	NA	NA	NA	NA	NA	NA	NA
GO_CYTOPLASMIC_DYNEIN_COMPLEX	NA	NA	NA	NA	NA	NA	0.000317163	0.277775	NA	NA	NA	NA	NA	0.0420458	NA	NA	NA	NA	NA	NA	NA	NA	NA	NA	NA	NA	NA	NA	NA	NA	NA	NA	0.0187548	NA	NA	0.0143158	NA	NA	NA	NA	NA	NA	NA	NA	NA	NA	NA	NA	NA
GO_CYTOPLASMIC_EXOSOME_RNASE_COMPLEX	NA	NA	NA	NA	NA	NA	NA	NA	NA	NA	NA	NA	NA	NA	NA	NA	NA	NA	NA	NA	NA	NA	NA	NA	NA	NA	NA	NA	0.0210529	NA	NA	NA	NA	NA	NA	NA	NA	NA	NA	NA	NA	NA	NA	0.00963526	0.0115834	NA	NA	NA	NA
GO_CYTOPLASMIC_MICROTUBULE	NA	NA	NA	NA	NA	NA	0.35816	0.0321451	NA	NA	NA	NA	0.588538	0.0338688	NA	NA	NA	0.013158	NA	NA	NA	NA	NA	NA	NA	NA	NA	NA	NA	NA	NA	NA	0.186011	0.0432518	NA	0.0310102	NA	NA	NA	NA	NA	NA	NA	NA	NA	NA	NA	NA	NA
GO_CYTOPLASMIC_MICROTUBULE_ORGANIZATION	0.414037	0.0476711	NA	NA	NA	NA	NA	NA	0.0255987	0.0655232	NA	NA	NA	NA	NA	NA	0.257267	0.00544064	0.338056	0.00861963	NA	NA	NA	NA	0.0325431	0.112474	NA	NA	NA	NA	0.0375331	0.4692	0.00376436	0.130763	NA	NA	0.0203787	NA	NA	NA	0.000408077	0.618659	NA	NA	0.03879	0.571782	0.663845	0.000386676	NA
GO_CYTOPLASMIC_PATTERN_RECOGNITION_RECEPTOR_SIGNALING_PATHWAY	NA	NA	0.010745	0.211967	NA	NA	NA	NA	NA	NA	NA	NA	0.245243	0.0217937	NA	NA	NA	NA	0.00953341	0.748821	0.623303	0.0110724	NA	NA	NA	NA	NA	NA	NA	NA	NA	NA	NA	0.030605	NA	NA	NA	NA	NA	NA	NA	NA	NA	NA	NA	NA	NA	NA	NA
GO_CYTOPLASMIC_PATTERN_RECOGNITION_RECEPTOR_SIGNALING_PATHWAY_IN_RESPONSE_TO_VIRUS	NA	NA	NA	NA	NA	NA	NA	NA	NA	NA	NA	NA	NA	NA	NA	NA	NA	NA	NA	NA	NA	NA	NA	NA	NA	NA	0.300113	0.0346499	NA	NA	NA	NA	NA	0.0381736	NA	NA	NA	NA	NA	NA	NA	NA	NA	NA	NA	NA	NA	NA	NA
GO_CYTOPLASMIC_REGION	NA	NA	NA	NA	NA	NA	NA	NA	NA	NA	0.0233533	0.209921	NA	NA	NA	NA	0.560653	0.000719025	0.865158	0.0330676	NA	NA	NA	NA	NA	NA	NA	NA	NA	NA	NA	NA	NA	NA	0.728987	8.27236e-05	NA	NA	NA	NA	NA	NA	NA	NA	NA	NA	0.270073	0.0160985	NA
GO_CYTOPLASMIC_SEQUESTERING_OF_PROTEIN	NA	NA	NA	NA	NA	0.0424986	NA	NA	NA	NA	0.026506	NA	NA	NA	0.321517	0.00209503	NA	NA	NA	NA	NA	NA	NA	NA	NA	NA	0.232559	0.0198028	NA	NA	NA	NA	NA	NA	NA	NA	0.0187999	NA	NA	NA	NA	NA	NA	NA	NA	NA	NA	NA	NA
GO_CYTOPLASMIC_SEQUESTERING_OF_TRANSCRIPTION_FACTOR	NA	NA	NA	NA	NA	0.0215196	NA	NA	NA	NA	NA	NA	NA	NA	NA	NA	NA	NA	NA	NA	NA	NA	NA	NA	NA	NA	NA	NA	NA	NA	NA	NA	NA	NA	NA	NA	NA	NA	NA	NA	NA	NA	NA	NA	NA	NA	NA	NA	NA
GO_CYTOPLASMIC_SIDE_OF_MEMBRANE	NA	NA	NA	NA	NA	NA	NA	NA	NA	NA	NA	NA	NA	NA	NA	NA	NA	NA	NA	NA	0.933312	0.0392095	NA	NA	NA	NA	NA	NA	NA	NA	NA	NA	NA	NA	NA	NA	NA	NA	NA	NA	NA	NA	NA	NA	NA	NA	NA	NA	NA
GO_CYTOPLASMIC_STRESS_GRANULE	NA	NA	NA	NA	NA	NA	NA	NA	NA	NA	0.00137742	0.150032	NA	NA	0.00148538	0.201894	NA	NA	0.0134402	0.0616013	0.000648008	0.089886	NA	NA	0.013731	0.492532	NA	NA	0.00128627	0.509915	0.00175089	0.168832	NA	NA	NA	NA	0.000604094	0.146062	0.0485433	NA	NA	NA	NA	NA	0.218706	0.0172285	0.0381763	0.310829	NA
GO_CYTOPLASMIC_TRANSLATION	NA	NA	NA	NA	NA	NA	NA	0.00106293	NA	NA	NA	NA	0.0154067	0.480233	NA	NA	0.0225369	0.554612	0.0470718	0.341934	NA	NA	NA	NA	0.0479791	0.611268	NA	NA	NA	NA	NA	NA	NA	NA	NA	NA	NA	NA	NA	NA	0.471517	0.0048341	NA	NA	NA	NA	NA	NA	NA
GO_CYTOPLASMIC_TRANSLATIONAL_ELONGATION	NA	NA	NA	NA	NA	NA	NA	NA	NA	NA	NA	NA	NA	NA	NA	NA	NA	NA	NA	NA	NA	NA	NA	NA	NA	NA	NA	NA	NA	NA	NA	NA	0.00524751	NA	NA	NA	NA	NA	NA	NA	NA	NA	NA	NA	NA	NA	NA	NA	NA
GO_CYTOPLASMIC_TRANSLATIONAL_INITIATION	NA	NA	NA	NA	NA	NA	NA	0.00196671	NA	NA	NA	0.0415746	NA	NA	NA	NA	NA	NA	NA	NA	NA	NA	NA	NA	NA	NA	NA	NA	NA	NA	NA	NA	NA	NA	NA	NA	NA	NA	NA	NA	NA	NA	NA	NA	NA	NA	NA	NA	NA
GO_CYTOPLASMIC_UBIQUITIN_LIGASE_COMPLEX	NA	NA	NA	NA	NA	0.0190072	NA	NA	NA	NA	NA	NA	NA	NA	NA	NA	NA	NA	NA	NA	NA	NA	NA	NA	NA	NA	NA	NA	NA	NA	NA	NA	NA	NA	NA	NA	NA	NA	NA	NA	NA	NA	NA	NA	NA	NA	NA	NA	NA
GO_CYTOSKELETAL_ANCHOR_ACTIVITY	NA	NA	NA	NA	NA	NA	NA	NA	NA	NA	0.0243762	NA	0.429833	0.000342439	NA	NA	NA	0.00686141	NA	NA	0.0386539	NA	NA	NA	NA	NA	NA	NA	0.0490984	NA	NA	NA	0.200079	0.0201031	NA	NA	NA	NA	NA	NA	NA	NA	NA	NA	NA	NA	0.00602331	NA	NA
GO_CYTOSKELETON_DEPENDENT_CYTOKINESIS	NA	NA	NA	0.0379852	NA	NA	NA	NA	NA	NA	NA	NA	0.463346	0.0048422	NA	NA	NA	NA	NA	NA	NA	NA	NA	NA	NA	NA	NA	NA	NA	NA	NA	NA	NA	NA	NA	NA	NA	NA	NA	NA	NA	NA	NA	NA	NA	NA	NA	NA	NA
GO_CYTOSKELETON_DEPENDENT_INTRACELLULAR_TRANSPORT	NA	NA	0.464177	0.0417816	NA	NA	0.104799	0.0353324	NA	NA	0.0719948	0.0109443	0.13383	0.0135946	NA	NA	0.2024	0.0103521	NA	NA	NA	NA	NA	NA	NA	NA	NA	NA	NA	NA	NA	NA	NA	NA	0.601672	0.00192528	NA	NA	NA	NA	NA	NA	NA	NA	NA	NA	NA	NA	NA
GO_CYTOSOLIC_CALCIUM_ION_TRANSPORT	NA	NA	NA	NA	NA	NA	NA	NA	NA	NA	NA	NA	0.163726	0.0220951	NA	NA	0.526264	0.0153172	NA	NA	NA	NA	NA	NA	NA	NA	NA	NA	NA	NA	NA	NA	NA	NA	NA	NA	NA	NA	NA	NA	NA	NA	NA	NA	NA	NA	NA	NA	NA
GO_CYTOSOLIC_RIBOSOME	NA	NA	NA	NA	NA	NA	NA	NA	NA	NA	NA	NA	NA	NA	NA	0.0355372	NA	NA	NA	NA	NA	NA	0.586293	0.0466684	NA	NA	NA	NA	NA	NA	NA	NA	NA	NA	NA	NA	NA	NA	NA	NA	NA	NA	NA	NA	NA	NA	NA	NA	NA
GO_CYTOSOLIC_SMALL_RIBOSOMAL_SUBUNIT	NA	NA	NA	NA	NA	NA	NA	NA	NA	NA	NA	NA	NA	NA	NA	NA	NA	NA	NA	NA	NA	NA	NA	NA	NA	NA	NA	NA	NA	NA	NA	NA	NA	NA	NA	NA	NA	NA	NA	NA	NA	NA	NA	NA	NA	NA	NA	NA	NA
GO_CYTOSOLIC_TRANSPORT	NA	NA	NA	NA	0.137541	0.00984477	0.746945	0.042419	NA	NA	NA	NA	NA	NA	NA	NA	NA	NA	0.00127488	0.423465	NA	NA	NA	NA	NA	NA	NA	NA	NA	NA	NA	NA	NA	NA	NA	NA	NA	NA	NA	NA	NA	NA	NA	NA	NA	NA	NA	NA	NA
GO_DAMAGED_DNA_BINDING	NA	NA	NA	NA	NA	NA	NA	NA	NA	NA	NA	NA	NA	NA	NA	NA	NA	NA	0.0370547	0.738386	NA	NA	NA	NA	NA	NA	0.532525	0.00355059	NA	NA	NA	NA	NA	NA	NA	NA	NA	NA	NA	NA	NA	NA	NA	NA	NA	NA	NA	NA	NA
GO_DEACETYLASE_ACTIVITY	NA	NA	NA	NA	0.00158413	NA	NA	NA	NA	NA	NA	NA	NA	NA	NA	NA	NA	NA	NA	NA	0.021752	0.248724	NA	NA	NA	NA	NA	NA	0.0306003	NA	0.012957	NA	NA	NA	0.0670521	0.000487542	NA	NA	NA	NA	0.0265414	0.133071	NA	0.0103644	NA	NA	NA	NA	NA
GO_DEADENYLATION_DEPENDENT_DECAPPING_OF_NUCLEAR_TRANSCRIBED_MRNA	NA	NA	NA	NA	NA	NA	NA	NA	NA	NA	NA	NA	NA	NA	NA	NA	NA	NA	NA	NA	NA	NA	NA	NA	NA	NA	NA	NA	NA	NA	NA	NA	NA	NA	NA	NA	NA	NA	NA	NA	NA	NA	NA	NA	NA	NA	NA	NA	NA
GO_DEAMINASE_ACTIVITY	NA	NA	NA	NA	NA	NA	NA	NA	NA	NA	0.0487146	0.257717	NA	NA	NA	NA	NA	NA	NA	NA	NA	NA	NA	0.0227247	NA	NA	NA	NA	NA	NA	NA	NA	NA	NA	0.277328	0.0317641	NA	NA	NA	NA	NA	NA	NA	NA	NA	NA	NA	NA	0.0242468
GO_DEATH_DOMAIN_BINDING	NA	NA	NA	NA	NA	NA	NA	NA	NA	NA	NA	NA	NA	NA	NA	NA	NA	NA	NA	NA	NA	NA	NA	0.00278449	NA	NA	NA	NA	NA	NA	NA	NA	NA	NA	NA	NA	NA	NA	NA	NA	NA	NA	NA	NA	NA	NA	NA	NA	NA
GO_DEATH_RECEPTOR_ACTIVITY	NA	NA	NA	NA	NA	NA	NA	NA	NA	NA	NA	NA	NA	NA	NA	0.00769196	NA	NA	NA	NA	NA	NA	NA	NA	NA	NA	NA	NA	NA	NA	NA	NA	NA	NA	NA	NA	0.0052403	NA	NA	NA	NA	NA	NA	NA	NA	NA	NA	NA	NA
GO_DEATH_RECEPTOR_BINDING	NA	NA	NA	NA	0.0236523	NA	NA	NA	0.301169	0.0343556	NA	NA	NA	NA	NA	NA	0.269569	0.0493772	NA	NA	NA	NA	NA	NA	0.0553653	0.0140704	NA	NA	0.0412453	NA	0.209736	0.0167518	NA	NA	NA	NA	NA	NA	NA	NA	NA	NA	NA	NA	NA	NA	NA	0.0365967	NA
GO_DEFENSE_RESPONSE_TO_FUNGUS	NA	NA	NA	NA	NA	NA	NA	NA	NA	NA	NA	NA	NA	NA	NA	NA	NA	NA	NA	NA	NA	NA	NA	NA	NA	NA	NA	NA	NA	NA	NA	NA	NA	NA	NA	NA	NA	NA	NA	NA	NA	NA	NA	NA	NA	NA	NA	NA	NA
GO_DEFENSE_RESPONSE_TO_VIRUS	NA	NA	0.635326	0.0170609	NA	NA	NA	NA	NA	NA	NA	NA	NA	NA	NA	NA	NA	NA	NA	NA	NA	NA	NA	NA	NA	NA	NA	NA	NA	NA	0.807148	0.0453037	0.928226	0.0453037	NA	NA	NA	NA	0.000232492	0.753791	0.760967	0.0436053	0.365739	0.0219587	NA	NA	NA	NA	NA
GO_DEFINITIVE_HEMOPOIESIS	NA	NA	NA	NA	NA	NA	NA	NA	0.0528406	0.0376106	NA	NA	NA	NA	NA	NA	NA	NA	NA	NA	NA	NA	NA	NA	NA	NA	NA	NA	NA	NA	NA	NA	NA	NA	NA	NA	NA	NA	NA	NA	NA	NA	NA	NA	NA	NA	NA	NA	NA
GO_DEMETHYLASE_ACTIVITY	NA	NA	NA	NA	NA	NA	NA	NA	NA	NA	NA	NA	NA	NA	NA	NA	NA	NA	NA	NA	NA	NA	0.262379	0.0313098	0.0358432	0.293902	NA	NA	NA	NA	NA	NA	NA	NA	NA	NA	NA	NA	NA	NA	NA	NA	NA	NA	NA	NA	NA	NA	NA
GO_DEMETHYLATION	NA	NA	NA	NA	NA	NA	NA	NA	NA	NA	NA	NA	NA	NA	NA	NA	NA	NA	NA	NA	NA	NA	NA	NA	0.0492761	0.483125	NA	NA	NA	NA	NA	NA	NA	NA	NA	NA	NA	NA	NA	NA	NA	NA	0.0105414	0.181636	NA	NA	NA	NA	NA
GO_DENDRITE_CYTOPLASM	NA	NA	NA	NA	NA	NA	NA	NA	0.121732	0.0134273	NA	NA	NA	NA	NA	NA	NA	NA	NA	NA	NA	NA	NA	NA	NA	NA	NA	NA	NA	0.0418565	NA	NA	NA	0.0451719	NA	NA	NA	0.0382439	NA	NA	0.0151284	NA	NA	NA	NA	NA	NA	NA	NA
GO_DENDRITE_DEVELOPMENT	0.346097	0.0485093	NA	NA	NA	NA	0.0471089	0.181315	NA	NA	NA	NA	0.172978	1.85795e-06	NA	NA	0.0924071	4.32113e-05	0.508119	0.0115656	NA	NA	NA	NA	NA	NA	NA	NA	NA	NA	NA	NA	NA	NA	NA	NA	NA	NA	NA	NA	NA	NA	NA	NA	NA	NA	NA	NA	0.0396814
GO_DENDRITE_EXTENSION	NA	NA	NA	NA	NA	NA	NA	NA	NA	NA	NA	NA	NA	NA	NA	NA	NA	NA	NA	NA	NA	NA	NA	NA	NA	NA	NA	NA	NA	NA	NA	NA	NA	NA	NA	NA	NA	NA	NA	NA	NA	NA	NA	NA	NA	NA	NA	NA	NA
GO_DENDRITE_MEMBRANE	NA	NA	NA	NA	NA	NA	NA	NA	NA	NA	NA	NA	NA	NA	NA	NA	NA	0.0417711	NA	NA	NA	NA	NA	NA	NA	NA	NA	NA	NA	NA	NA	NA	NA	NA	NA	NA	NA	NA	NA	NA	NA	NA	NA	NA	NA	NA	NA	NA	NA
GO_DENDRITE_MORPHOGENESIS	NA	NA	0.0106728	0.113831	NA	NA	0.0309427	0.0750484	NA	NA	NA	NA	NA	NA	0.442155	0.0246323	NA	NA	0.302984	0.028183	NA	NA	NA	NA	NA	NA	NA	NA	NA	NA	NA	NA	NA	NA	NA	NA	0.152008	0.0446688	NA	NA	NA	NA	NA	NA	NA	NA	0.0400055	0.0725601	0.0249057
GO_DENDRITE_SELF_AVOIDANCE	NA	NA	NA	NA	NA	NA	0.0266982	0.219566	NA	NA	NA	NA	NA	0.0252818	NA	NA	NA	NA	NA	NA	NA	0.00514222	NA	NA	NA	NA	NA	NA	NA	NA	NA	NA	NA	NA	NA	NA	NA	NA	NA	NA	NA	NA	NA	NA	NA	0.00115809	NA	NA	NA
GO_DENDRITIC_CELL_ANTIGEN_PROCESSING_AND_PRESENTATION	NA	NA	NA	NA	NA	NA	NA	NA	0.0184327	NA	NA	NA	NA	NA	0.0164558	NA	NA	NA	NA	NA	NA	NA	NA	NA	NA	NA	NA	NA	NA	NA	NA	NA	NA	NA	NA	NA	NA	NA	NA	NA	NA	NA	NA	NA	NA	NA	NA	NA	NA
GO_DENDRITIC_CELL_APOPTOTIC_PROCESS	NA	NA	NA	NA	NA	NA	NA	NA	NA	NA	NA	NA	NA	NA	NA	NA	NA	NA	NA	NA	NA	NA	NA	NA	NA	NA	NA	NA	NA	NA	NA	NA	NA	NA	NA	NA	NA	NA	NA	NA	NA	NA	NA	0.00594836	NA	NA	NA	NA	NA
GO_DENDRITIC_CELL_CHEMOTAXIS	NA	NA	NA	NA	NA	NA	NA	NA	NA	NA	NA	NA	NA	NA	NA	NA	NA	NA	NA	NA	NA	NA	NA	NA	NA	NA	NA	NA	NA	NA	NA	NA	NA	NA	NA	NA	NA	NA	NA	NA	NA	NA	NA	0.0272395	NA	NA	NA	NA	NA
GO_DENDRITIC_CELL_DIFFERENTIATION	NA	NA	NA	NA	NA	NA	NA	NA	NA	NA	NA	NA	NA	NA	NA	NA	NA	NA	NA	NA	NA	NA	NA	NA	NA	NA	NA	NA	NA	NA	NA	NA	NA	NA	NA	NA	NA	NA	NA	NA	NA	NA	NA	0.0117713	NA	NA	NA	NA	NA
GO_DENDRITIC_CELL_MIGRATION	NA	NA	NA	NA	NA	NA	NA	NA	NA	NA	NA	NA	NA	NA	NA	NA	NA	NA	NA	NA	NA	NA	NA	NA	NA	NA	NA	NA	NA	NA	NA	NA	NA	NA	NA	NA	NA	NA	NA	NA	NA	NA	NA	0.0386949	NA	NA	NA	NA	NA
GO_DENDRITIC_SHAFT	NA	NA	NA	NA	NA	NA	NA	NA	NA	NA	NA	NA	NA	NA	NA	NA	0.4496	0.00466018	NA	NA	NA	NA	NA	NA	NA	NA	NA	NA	NA	NA	NA	NA	NA	NA	NA	NA	0.296701	0.0468114	NA	NA	NA	NA	NA	NA	NA	NA	NA	NA	NA
GO_DENDRITIC_SPINE_DEVELOPMENT	NA	NA	NA	NA	NA	NA	0.0245705	0.46646	NA	NA	NA	NA	0.256112	0.000199387	NA	NA	NA	NA	NA	NA	NA	NA	NA	NA	0.01369	NA	NA	NA	NA	NA	NA	NA	NA	NA	NA	NA	NA	NA	NA	NA	NA	NA	NA	NA	NA	NA	0.00821949	0.461212	0.0422027
GO_DENDRITIC_SPINE_HEAD	NA	NA	NA	NA	NA	NA	NA	NA	NA	NA	NA	NA	NA	NA	NA	NA	NA	NA	NA	NA	NA	NA	NA	NA	NA	NA	NA	NA	NA	NA	NA	NA	NA	0.00613162	NA	NA	NA	NA	NA	NA	NA	NA	NA	NA	NA	NA	NA	NA	NA
GO_DENDRITIC_SPINE_MAINTENANCE	NA	NA	NA	NA	NA	NA	0.277214	0.03728	0.048362	0.256397	0.0203413	NA	NA	NA	NA	NA	NA	NA	NA	NA	NA	NA	NA	NA	NA	NA	NA	NA	NA	NA	NA	NA	NA	NA	NA	NA	NA	NA	NA	NA	NA	0.0363701	NA	NA	NA	NA	NA	NA	NA
GO_DENDRITIC_SPINE_MEMBRANE	NA	NA	NA	NA	NA	NA	NA	NA	NA	NA	NA	NA	NA	NA	NA	NA	NA	0.028932	NA	NA	NA	NA	NA	NA	NA	NA	NA	NA	NA	NA	NA	NA	NA	NA	NA	NA	NA	NA	NA	NA	NA	NA	NA	NA	NA	NA	NA	NA	NA
GO_DENDRITIC_SPINE_MORPHOGENESIS	NA	NA	0.00780319	0.184411	NA	NA	0.00319733	0.246726	NA	NA	NA	NA	0.0709548	5.00378e-05	NA	NA	0.251485	0.0252234	NA	NA	NA	NA	NA	NA	NA	NA	NA	NA	NA	NA	NA	NA	NA	NA	NA	NA	NA	NA	NA	NA	NA	NA	NA	NA	NA	NA	0.0216646	0.243158	NA
GO_DENDRITIC_TRANSPORT	NA	NA	NA	NA	NA	NA	NA	NA	NA	NA	NA	NA	NA	NA	NA	NA	NA	NA	NA	NA	NA	NA	NA	NA	NA	NA	NA	NA	NA	NA	NA	NA	NA	NA	NA	NA	NA	0.00353736	NA	NA	NA	NA	NA	NA	NA	NA	NA	NA	NA
GO_DENSE_CORE_GRANULE	NA	NA	NA	NA	NA	NA	NA	NA	NA	NA	NA	NA	NA	NA	NA	NA	NA	NA	NA	NA	NA	NA	NA	NA	NA	NA	0.0378858	NA	NA	NA	NA	NA	NA	NA	NA	NA	NA	NA	NA	NA	NA	NA	NA	NA	NA	NA	NA	NA	NA
GO_DENSE_CORE_GRANULE_TRANSPORT	NA	NA	NA	NA	NA	NA	NA	NA	NA	NA	NA	NA	NA	NA	NA	NA	NA	NA	NA	NA	NA	NA	NA	NA	NA	NA	NA	NA	NA	NA	NA	NA	NA	NA	NA	NA	NA	NA	NA	NA	NA	NA	NA	NA	NA	NA	NA	NA	NA
GO_DEOXYRIBONUCLEASE_ACTIVITY	NA	NA	NA	NA	NA	NA	NA	NA	NA	NA	NA	NA	NA	NA	NA	NA	NA	NA	NA	NA	NA	NA	NA	NA	NA	NA	0.0300216	0.107603	NA	NA	0.00501418	0.117479	NA	NA	NA	NA	NA	0.0166287	NA	NA	NA	NA	0.0328551	0.132701	NA	NA	NA	NA	NA
GO_DEOXYRIBONUCLEOSIDE_TRIPHOSPHATE_METABOLIC_PROCESS	NA	NA	NA	NA	NA	NA	NA	NA	NA	NA	NA	NA	NA	NA	NA	NA	NA	NA	NA	NA	NA	NA	NA	NA	NA	NA	NA	NA	NA	NA	NA	NA	NA	NA	NA	NA	NA	NA	NA	NA	NA	NA	NA	NA	NA	0.0235986	NA	NA	NA
GO_DEOXYRIBONUCLEOTIDE_BIOSYNTHETIC_PROCESS	NA	NA	NA	NA	NA	NA	NA	NA	NA	NA	NA	NA	NA	NA	NA	NA	NA	NA	NA	NA	NA	NA	NA	NA	NA	NA	NA	NA	NA	NA	NA	NA	NA	NA	NA	NA	NA	NA	NA	NA	NA	NA	NA	NA	NA	NA	NA	NA	NA
GO_DEOXYRIBONUCLEOTIDE_METABOLIC_PROCESS	NA	NA	NA	NA	NA	NA	NA	NA	NA	NA	NA	NA	NA	NA	NA	NA	NA	NA	NA	NA	NA	NA	NA	NA	NA	NA	NA	NA	NA	NA	NA	0.00507432	NA	NA	NA	NA	NA	NA	NA	NA	NA	NA	NA	NA	NA	NA	NA	NA	0.0286629
GO_DEOXYRIBOSE_PHOSPHATE_BIOSYNTHETIC_PROCESS	NA	NA	NA	NA	NA	NA	NA	NA	NA	NA	NA	NA	NA	NA	NA	NA	NA	NA	NA	NA	NA	NA	NA	NA	NA	NA	NA	NA	NA	NA	NA	NA	NA	NA	NA	NA	NA	NA	NA	NA	NA	NA	NA	NA	NA	NA	NA	NA	NA
GO_DEOXYRIBOSE_PHOSPHATE_CATABOLIC_PROCESS	NA	NA	NA	NA	NA	NA	NA	NA	0.313585	0.0376106	NA	NA	NA	NA	NA	NA	NA	NA	NA	NA	NA	NA	NA	NA	NA	NA	NA	NA	NA	NA	NA	0.00114239	NA	NA	NA	NA	NA	NA	NA	NA	NA	NA	NA	NA	NA	NA	NA	NA	NA
GO_DEPHOSPHORYLATION	0.0239447	0.0557746	0.0229059	0.171576	0.00669951	0.170763	NA	NA	0.00318791	0.189697	0.463599	0.00626965	NA	NA	0.0378777	0.476946	0.00466266	0.271522	0.336754	0.0217436	NA	NA	0.017252	0.290265	0.0143786	0.940972	NA	NA	NA	NA	0.0305496	0.547134	0.0115379	0.72761	NA	NA	0.301052	0.0149125	NA	NA	0.0415314	0.215338	NA	NA	NA	NA	NA	NA	0.16924
GO_DERMATAN_SULFATE_PROTEOGLYCAN_METABOLIC_PROCESS	NA	NA	NA	NA	NA	NA	NA	NA	NA	NA	NA	NA	NA	NA	0.0286364	NA	NA	NA	NA	NA	NA	NA	NA	NA	NA	NA	NA	NA	NA	NA	NA	NA	NA	NA	NA	NA	NA	NA	NA	NA	NA	NA	NA	NA	NA	NA	NA	NA	NA
GO_DETECTION_OF_BIOTIC_STIMULUS	NA	NA	NA	NA	NA	NA	NA	NA	NA	NA	NA	NA	NA	NA	NA	NA	NA	NA	0.499817	0.0351763	NA	NA	NA	NA	NA	NA	NA	NA	NA	NA	NA	NA	NA	NA	NA	NA	NA	NA	NA	NA	NA	NA	NA	NA	NA	NA	NA	NA	NA
GO_DETECTION_OF_EXTERNAL_BIOTIC_STIMULUS	NA	NA	NA	NA	NA	NA	NA	NA	NA	NA	NA	NA	NA	NA	NA	NA	NA	NA	0.369795	0.0118878	NA	NA	NA	NA	NA	NA	NA	NA	NA	NA	NA	NA	NA	NA	NA	NA	NA	NA	NA	NA	NA	NA	NA	NA	NA	NA	NA	NA	NA
GO_DETECTION_OF_MECHANICAL_STIMULUS	NA	NA	NA	NA	NA	NA	NA	NA	NA	NA	NA	NA	NA	NA	NA	NA	NA	NA	NA	NA	NA	NA	NA	NA	NA	NA	NA	NA	NA	NA	NA	NA	NA	NA	NA	NA	NA	NA	NA	NA	NA	NA	NA	NA	NA	NA	NA	NA	NA
GO_DETECTION_OF_MECHANICAL_STIMULUS_INVOLVED_IN_SENSORY_PERCEPTION	NA	NA	NA	NA	NA	NA	NA	NA	NA	NA	NA	NA	NA	NA	NA	NA	NA	NA	NA	NA	NA	NA	NA	NA	NA	NA	NA	NA	NA	NA	NA	NA	NA	NA	NA	NA	NA	NA	NA	NA	NA	NA	NA	NA	NA	NA	NA	NA	NA
GO_DETECTION_OF_MECHANICAL_STIMULUS_INVOLVED_IN_SENSORY_PERCEPTION_OF_PAIN	NA	NA	NA	NA	NA	NA	NA	NA	NA	NA	NA	NA	NA	NA	NA	NA	NA	NA	NA	NA	NA	NA	NA	NA	NA	NA	NA	NA	NA	NA	0.0112952	NA	NA	NA	NA	NA	NA	NA	NA	NA	NA	NA	NA	NA	NA	NA	NA	NA	NA
GO_DETECTION_OF_MECHANICAL_STIMULUS_INVOLVED_IN_SENSORY_PERCEPTION_OF_SOUND	NA	NA	NA	NA	NA	NA	NA	NA	NA	NA	NA	NA	NA	NA	NA	NA	NA	NA	NA	NA	NA	NA	NA	NA	NA	NA	NA	NA	NA	NA	NA	NA	NA	NA	NA	NA	NA	NA	NA	NA	NA	NA	NA	NA	NA	NA	NA	NA	NA
GO_DETECTION_OF_STIMULUS_INVOLVED_IN_SENSORY_PERCEPTION_OF_PAIN	NA	NA	NA	NA	NA	NA	NA	NA	NA	NA	NA	NA	NA	NA	NA	NA	NA	NA	NA	NA	NA	NA	NA	NA	NA	NA	NA	NA	NA	NA	0.0342381	NA	NA	NA	NA	NA	NA	NA	NA	NA	NA	NA	NA	NA	NA	NA	NA	NA	NA
GO_DETERMINATION_OF_ADULT_LIFESPAN	NA	NA	NA	0.0190586	NA	0.0241612	NA	NA	NA	NA	NA	NA	NA	NA	NA	NA	NA	NA	NA	NA	NA	NA	NA	NA	NA	NA	0.0158142	NA	NA	NA	NA	NA	NA	NA	NA	NA	NA	NA	NA	NA	NA	NA	NA	NA	NA	NA	NA	NA	NA
GO_DETOXIFICATION_OF_INORGANIC_COMPOUND	NA	NA	NA	NA	NA	NA	NA	NA	NA	NA	NA	NA	NA	NA	NA	NA	0.0281881	NA	0.0407355	NA	NA	NA	NA	NA	NA	NA	NA	NA	NA	NA	NA	NA	NA	NA	NA	NA	NA	NA	NA	NA	NA	NA	NA	NA	NA	NA	NA	NA	NA
GO_DEVELOPMENT_OF_PRIMARY_FEMALE_SEXUAL_CHARACTERISTICS	NA	NA	NA	NA	NA	NA	NA	NA	NA	NA	NA	NA	NA	NA	NA	NA	NA	NA	NA	NA	NA	NA	NA	NA	NA	NA	NA	NA	NA	NA	NA	NA	NA	NA	NA	NA	NA	NA	NA	NA	NA	NA	NA	NA	NA	NA	NA	NA	NA
GO_DEVELOPMENT_OF_PRIMARY_SEXUAL_CHARACTERISTICS	NA	NA	NA	NA	NA	NA	NA	NA	NA	NA	NA	NA	NA	NA	NA	NA	NA	NA	NA	NA	NA	NA	NA	NA	NA	NA	NA	NA	NA	NA	NA	NA	NA	NA	NA	NA	NA	NA	NA	NA	NA	NA	NA	NA	NA	NA	NA	NA	NA
GO_DEVELOPMENTAL_CELL_GROWTH	0.867332	0.042799	0.0106971	0.951689	NA	NA	NA	NA	0.609169	0.0243084	NA	NA	0.389163	0.00424978	0.363453	0.0178669	0.166049	0.000374599	NA	NA	0.00218109	NA	NA	NA	NA	NA	NA	NA	NA	NA	0.06038	0.0320236	0.0334278	0.08952	NA	NA	NA	NA	NA	NA	NA	NA	NA	NA	NA	NA	NA	NA	NA
GO_DEVELOPMENTAL_GROWTH_INVOLVED_IN_MORPHOGENESIS	NA	NA	NA	NA	NA	NA	NA	NA	NA	NA	NA	NA	0.246033	0.0012689	NA	NA	0.30722	0.00372412	NA	NA	0.0200756	0.801132	NA	NA	NA	NA	NA	NA	NA	NA	NA	NA	0.215925	0.0314638	NA	NA	NA	NA	NA	NA	NA	NA	NA	NA	NA	NA	NA	NA	NA
GO_DEVELOPMENTAL_MATURATION	NA	NA	NA	NA	NA	NA	NA	NA	NA	NA	0.828203	0.0174346	0.00622149	0.16205	NA	NA	NA	NA	NA	NA	NA	NA	NA	NA	NA	NA	NA	NA	NA	NA	NA	NA	NA	NA	NA	NA	NA	NA	NA	NA	NA	NA	NA	NA	NA	NA	0.54412	0.0125381	NA
GO_DEVELOPMENTAL_PIGMENTATION	NA	NA	NA	NA	NA	NA	NA	NA	NA	NA	NA	NA	NA	NA	NA	NA	NA	NA	NA	NA	NA	NA	NA	NA	NA	NA	NA	NA	NA	NA	NA	NA	NA	NA	NA	NA	NA	NA	NA	NA	NA	NA	NA	NA	NA	NA	NA	NA	0.0472599
GO_DIACYLGLYCEROL_BINDING	NA	NA	NA	NA	NA	0.0122895	NA	NA	NA	NA	NA	NA	NA	NA	NA	NA	NA	NA	NA	NA	NA	NA	NA	NA	0.0212549	NA	NA	NA	NA	NA	NA	NA	NA	NA	NA	NA	NA	NA	NA	NA	NA	NA	NA	NA	NA	NA	NA	NA	NA
GO_DIACYLGLYCEROL_KINASE_ACTIVITY	NA	NA	NA	NA	NA	NA	NA	NA	NA	NA	0.00628561	NA	NA	NA	NA	NA	NA	NA	NA	NA	NA	NA	NA	NA	NA	NA	NA	NA	NA	NA	NA	NA	NA	NA	0.00524751	NA	NA	NA	NA	NA	NA	NA	NA	NA	NA	NA	NA	NA	NA
GO_DIACYLGLYCEROL_METABOLIC_PROCESS	NA	NA	0.272297	0.0393642	NA	NA	NA	NA	NA	NA	0.0309808	NA	NA	NA	NA	NA	NA	NA	NA	NA	NA	NA	NA	NA	NA	NA	NA	NA	NA	NA	NA	NA	NA	NA	0.0260976	NA	NA	NA	NA	NA	NA	NA	NA	NA	NA	NA	NA	NA	NA
GO_DICARBOXYLIC_ACID_METABOLIC_PROCESS	NA	NA	NA	NA	NA	NA	NA	NA	NA	NA	NA	NA	NA	NA	NA	NA	NA	NA	NA	NA	NA	NA	NA	NA	NA	NA	NA	NA	NA	NA	NA	NA	NA	NA	NA	NA	NA	NA	NA	NA	NA	NA	NA	NA	NA	NA	NA	NA	NA
GO_DICARBOXYLIC_ACID_TRANSMEMBRANE_TRANSPORTER_ACTIVITY	NA	NA	NA	NA	NA	NA	NA	NA	NA	NA	NA	NA	NA	NA	NA	NA	NA	NA	NA	0.0431047	NA	NA	NA	NA	NA	NA	NA	NA	NA	NA	NA	NA	NA	NA	NA	NA	NA	NA	NA	NA	NA	NA	NA	NA	NA	NA	NA	NA	NA
GO_DICARBOXYLIC_ACID_TRANSPORT	NA	NA	NA	NA	NA	NA	NA	NA	NA	NA	NA	NA	NA	NA	NA	NA	NA	NA	0.559597	0.0475341	NA	NA	NA	NA	NA	NA	NA	NA	NA	NA	NA	NA	NA	NA	NA	NA	NA	NA	NA	NA	NA	NA	NA	NA	NA	NA	NA	NA	NA
GO_DIGESTIVE_SYSTEM_PROCESS	NA	NA	NA	NA	NA	NA	NA	NA	NA	NA	NA	NA	NA	NA	NA	NA	NA	NA	NA	NA	0.769101	0.0321624	NA	NA	NA	NA	NA	NA	NA	NA	NA	NA	NA	NA	NA	NA	NA	NA	NA	NA	NA	NA	NA	NA	NA	NA	NA	NA	NA
GO_DIGESTIVE_TRACT_MORPHOGENESIS	NA	NA	NA	NA	NA	NA	NA	NA	NA	NA	NA	NA	NA	NA	NA	NA	NA	NA	NA	NA	NA	NA	NA	NA	NA	NA	NA	NA	NA	NA	NA	NA	NA	NA	NA	NA	NA	NA	NA	NA	NA	NA	NA	NA	NA	NA	NA	NA	NA
GO_DIOL_BIOSYNTHETIC_PROCESS	NA	NA	NA	NA	NA	0.0391659	0.300315	0.0444282	NA	NA	NA	NA	NA	NA	NA	NA	NA	NA	NA	NA	NA	NA	NA	NA	NA	NA	NA	NA	NA	NA	NA	NA	NA	NA	NA	NA	NA	NA	NA	NA	NA	NA	NA	NA	NA	NA	NA	NA	NA
GO_DIOL_METABOLIC_PROCESS	NA	NA	NA	NA	NA	NA	NA	NA	NA	NA	NA	NA	NA	NA	NA	NA	NA	NA	NA	NA	NA	NA	NA	0.0176493	NA	NA	NA	NA	NA	NA	NA	NA	NA	NA	NA	NA	NA	NA	NA	NA	NA	NA	NA	NA	NA	NA	NA	NA	NA
GO_DIOXYGENASE_ACTIVITY	NA	NA	0.686204	0.0282273	NA	NA	NA	NA	NA	NA	NA	NA	NA	NA	NA	NA	NA	NA	NA	NA	NA	NA	NA	NA	0.0305707	0.565918	NA	NA	NA	NA	NA	NA	NA	NA	NA	NA	NA	NA	NA	NA	NA	NA	NA	NA	NA	NA	NA	NA	NA
GO_DISACCHARIDE_METABOLIC_PROCESS	NA	NA	NA	NA	NA	NA	NA	NA	NA	NA	0.00628561	NA	NA	NA	NA	NA	NA	NA	NA	0.0196172	NA	NA	NA	NA	NA	NA	NA	NA	NA	NA	NA	0.00514333	NA	NA	NA	NA	NA	NA	NA	NA	NA	NA	NA	NA	NA	NA	NA	NA	NA
GO_DISORDERED_DOMAIN_SPECIFIC_BINDING	NA	NA	NA	NA	NA	NA	NA	NA	NA	NA	NA	NA	NA	NA	NA	NA	NA	NA	NA	NA	0.0143953	NA	NA	NA	NA	NA	0.339293	0.0455312	NA	NA	NA	NA	NA	NA	NA	NA	NA	NA	NA	NA	NA	0.0170309	NA	NA	NA	NA	0.46341	0.0171848	NA
GO_DISTAL_AXON	NA	NA	NA	NA	NA	NA	NA	NA	NA	NA	NA	NA	0.519255	0.00121419	NA	NA	0.528421	0.00405495	NA	NA	0.00491674	0.87982	NA	NA	NA	NA	NA	NA	0.881135	0.00999274	NA	NA	NA	NA	NA	NA	NA	NA	0.182525	0.00652636	NA	NA	NA	NA	NA	NA	0.0854047	0.0475435	NA
GO_DISTAL_TUBULE_DEVELOPMENT	NA	NA	NA	NA	NA	NA	NA	NA	NA	NA	NA	NA	NA	NA	NA	NA	NA	NA	NA	NA	NA	NA	NA	NA	NA	NA	NA	NA	NA	NA	0.00831893	NA	NA	NA	NA	NA	NA	NA	NA	NA	NA	NA	NA	NA	NA	NA	NA	NA	NA
GO_DIVALENT_INORGANIC_CATION_TRANSMEMBRANE_TRANSPORTER_ACTIVITY	NA	NA	NA	NA	NA	NA	NA	NA	NA	NA	NA	NA	0.225364	0.0421256	NA	NA	NA	NA	0.598819	0.0453991	NA	NA	NA	NA	NA	NA	NA	NA	NA	NA	NA	NA	NA	NA	NA	NA	NA	NA	NA	NA	NA	NA	NA	NA	NA	NA	NA	NA	NA
GO_DIVALENT_INORGANIC_CATION_TRANSPORT	NA	NA	NA	NA	NA	NA	NA	NA	NA	NA	NA	NA	0.227559	0.00852805	NA	NA	0.468624	0.0130752	NA	NA	NA	NA	NA	NA	NA	NA	NA	NA	NA	NA	NA	NA	NA	NA	NA	NA	NA	NA	NA	NA	NA	NA	0.0119409	0.409861	NA	NA	NA	NA	NA
GO_DNA_APURINIC_OR_APYRIMIDINIC_SITE_ENDONUCLEASE_ACTIVITY	NA	NA	NA	NA	NA	NA	NA	NA	NA	NA	NA	NA	NA	NA	NA	NA	NA	NA	NA	0.0270962	NA	NA	NA	NA	NA	NA	NA	NA	NA	NA	NA	NA	NA	NA	0.00734389	NA	NA	NA	NA	NA	0.000916779	0.180183	NA	NA	NA	NA	NA	NA	NA
GO_DNA_BINDING_TRANSCRIPTION_FACTOR_BINDING	NA	NA	0.275289	0.00477719	NA	NA	0.109269	0.00101412	0.00381267	0.250256	NA	NA	0.00136856	0.177813	0.129073	0.00601502	NA	NA	0.128046	0.0484774	0.00148065	0.209661	0.299628	0.0420286	NA	NA	NA	NA	NA	NA	0.051952	0.00263753	0.0626809	0.00831076	0.139751	0.000247305	0.0153172	0.210296	NA	NA	0.0029006	0.89956	0.230422	0.0131233	NA	NA	0.245675	0.040364	0.000312937
GO_DNA_BINDING_TRANSCRIPTION_REPRESSOR_ACTIVITY	NA	NA	0.0269487	0.249783	NA	NA	0.629036	0.0149679	NA	NA	0.0797609	0.0130301	NA	NA	NA	NA	NA	NA	NA	NA	NA	NA	NA	NA	NA	NA	NA	NA	NA	NA	0.75386	0.00667293	NA	NA	NA	NA	NA	NA	NA	NA	NA	NA	NA	NA	NA	NA	NA	NA	NA
GO_DNA_BIOSYNTHETIC_PROCESS	0.023076	0.0897584	NA	NA	0.670812	0.00642147	NA	NA	0.662081	0.0230987	NA	NA	NA	NA	NA	NA	NA	NA	NA	NA	0.0197806	0.728992	NA	NA	NA	NA	0.000363101	0.542068	NA	NA	0.656762	0.0125074	NA	NA	NA	NA	NA	NA	NA	NA	NA	NA	NA	NA	NA	NA	NA	NA	NA
GO_DNA_CATABOLIC_PROCESS	NA	NA	NA	NA	NA	NA	NA	NA	0.00697853	NA	NA	NA	NA	NA	NA	NA	NA	NA	NA	NA	NA	NA	0.0460514	0.270381	0.564901	0.00701571	NA	NA	NA	NA	NA	NA	NA	NA	NA	NA	NA	NA	NA	NA	NA	NA	NA	NA	NA	NA	NA	NA	NA
GO_DNA_CATABOLIC_PROCESS_ENDONUCLEOLYTIC	NA	NA	NA	NA	NA	NA	NA	NA	0.0220945	NA	NA	NA	NA	NA	NA	NA	NA	NA	NA	NA	NA	NA	0.029964	NA	0.482036	0.00361125	NA	NA	NA	NA	NA	NA	NA	NA	NA	NA	NA	0.0382439	NA	NA	NA	NA	NA	NA	NA	NA	NA	NA	NA
GO_DNA_CONFORMATION_CHANGE	NA	NA	NA	NA	NA	NA	NA	NA	NA	NA	NA	NA	NA	NA	NA	NA	NA	NA	NA	NA	NA	NA	0.154389	0.0460585	NA	NA	NA	NA	NA	NA	NA	NA	NA	NA	NA	NA	NA	NA	NA	NA	NA	NA	NA	NA	NA	NA	NA	NA	NA
GO_DNA_DAMAGE_RESPONSE_SIGNAL_TRANSDUCTION_BY_P53_CLASS_MEDIATOR	NA	NA	0.392244	0.000419177	NA	NA	NA	NA	NA	0.020905	0.0311956	0.631558	NA	NA	NA	NA	NA	NA	NA	NA	2.23013e-05	NA	NA	NA	6.55364e-06	0.625312	NA	NA	NA	NA	NA	NA	0.0232027	0.65937	NA	NA	NA	NA	NA	NA	0.0247718	0.48431	NA	NA	NA	NA	NA	NA	0.556782
GO_DNA_DAMAGE_RESPONSE_SIGNAL_TRANSDUCTION_RESULTING_IN_TRANSCRIPTION	NA	NA	NA	NA	NA	NA	0.0333321	NA	NA	NA	NA	NA	NA	NA	NA	NA	NA	NA	0.292649	0.0497773	0.026569	NA	NA	NA	0.00458801	NA	0.0176585	NA	NA	NA	NA	NA	NA	NA	NA	NA	NA	NA	NA	NA	0.24339	0.0298721	NA	NA	NA	NA	NA	0.0300602	NA
GO_DNA_DEALKYLATION	NA	NA	NA	NA	NA	NA	NA	NA	NA	NA	NA	NA	NA	NA	NA	NA	NA	NA	NA	NA	NA	NA	NA	NA	NA	NA	NA	0.0410428	NA	0.0418565	NA	0.0451719	NA	NA	NA	NA	NA	NA	NA	NA	NA	NA	NA	NA	NA	NA	NA	NA	0.0271574
GO_DNA_DEALKYLATION_INVOLVED_IN_DNA_REPAIR	NA	NA	NA	0.00668292	NA	NA	NA	NA	NA	NA	NA	NA	0.225312	0.0100828	NA	NA	NA	NA	NA	NA	NA	NA	NA	NA	NA	NA	NA	0.00381778	NA	0.00389976	NA	NA	NA	NA	NA	NA	NA	NA	0.0466103	NA	NA	NA	NA	NA	NA	NA	NA	NA	NA
GO_DNA_DEPENDENT_ATPASE_ACTIVITY	NA	NA	NA	NA	0.0412605	0.790622	NA	NA	0.0434485	0.798793	NA	NA	NA	NA	NA	NA	NA	NA	NA	NA	0.0191533	NA	0.579582	0.0446055	0.056658	0.0171257	NA	NA	0.0315566	NA	NA	NA	NA	NA	NA	NA	NA	NA	NA	NA	NA	NA	NA	NA	NA	NA	0.0382427	0.490993	NA
GO_DNA_DEPENDENT_DNA_REPLICATION	NA	NA	0.297768	0.042863	NA	NA	NA	NA	NA	NA	NA	NA	NA	NA	NA	NA	NA	NA	NA	NA	NA	NA	NA	NA	NA	NA	NA	NA	NA	NA	0.101382	0.0179084	NA	NA	NA	NA	NA	NA	NA	NA	NA	NA	NA	NA	NA	NA	NA	NA	NA
GO_DNA_DEPENDENT_DNA_REPLICATION_MAINTENANCE_OF_FIDELITY	NA	NA	0.428627	0.0179981	NA	NA	NA	NA	0.043	0.479077	NA	NA	NA	NA	NA	NA	NA	NA	NA	NA	NA	NA	0.297024	0.0409608	NA	NA	NA	NA	NA	NA	NA	NA	NA	NA	NA	NA	NA	NA	NA	NA	NA	NA	NA	NA	NA	NA	NA	NA	NA
GO_DNA_DIRECTED_DNA_POLYMERASE_ACTIVITY	NA	NA	NA	NA	NA	NA	NA	NA	NA	NA	NA	0.0206013	NA	NA	NA	NA	NA	NA	NA	NA	NA	NA	NA	NA	NA	NA	0.00250088	0.204266	NA	NA	0.0317392	0.214189	NA	NA	NA	NA	NA	NA	NA	NA	NA	NA	NA	NA	NA	NA	NA	NA	NA
GO_DNA_DOUBLE_STRAND_BREAK_PROCESSING	NA	NA	NA	NA	NA	NA	NA	NA	NA	NA	NA	NA	NA	NA	NA	NA	NA	NA	NA	NA	NA	NA	NA	NA	NA	NA	NA	NA	NA	NA	0.0342381	NA	NA	NA	NA	NA	NA	NA	NA	NA	NA	NA	NA	NA	NA	NA	NA	NA	0.172801
GO_DNA_GEOMETRIC_CHANGE	NA	NA	0.771995	0.0159231	NA	NA	NA	NA	NA	NA	NA	NA	NA	NA	NA	NA	NA	NA	NA	NA	NA	NA	0.605795	0.0103589	NA	NA	NA	NA	0.0117288	NA	NA	NA	NA	NA	0.327175	0.0189676	NA	NA	NA	NA	0.103863	0.0318729	0.0493066	0.355578	NA	NA	NA	NA	NA
GO_DNA_HELICASE_ACTIVITY	NA	NA	NA	NA	NA	NA	NA	NA	NA	NA	NA	NA	NA	NA	NA	NA	NA	NA	NA	NA	NA	NA	NA	NA	NA	NA	NA	NA	0.00881442	NA	NA	NA	NA	NA	NA	NA	NA	NA	NA	NA	NA	NA	NA	NA	NA	NA	0.0449201	NA	NA
GO_DNA_HELICASE_COMPLEX	NA	NA	NA	NA	NA	NA	NA	NA	NA	NA	NA	NA	NA	NA	NA	NA	NA	NA	NA	NA	NA	NA	NA	NA	0.0325649	0.12828	NA	NA	NA	NA	NA	NA	NA	NA	NA	NA	NA	NA	NA	NA	NA	NA	0.0132619	0.149885	NA	NA	NA	NA	NA
GO_DNA_INTEGRITY_CHECKPOINT	NA	NA	0.605691	0.00103061	0.0450249	0.0823836	0.0155921	0.451038	NA	NA	0.0336613	NA	NA	NA	NA	NA	NA	NA	NA	NA	0.00834806	NA	0.00943901	0.328693	5.03852e-07	0.4322	NA	NA	0.0480309	0.200514	0.563895	0.0229065	0.22209	0.0229065	NA	NA	NA	NA	NA	NA	0.012384	0.228475	NA	NA	NA	NA	0.297932	0.0117641	NA
GO_DNA_LIGATION	NA	NA	NA	NA	NA	NA	NA	NA	NA	NA	NA	NA	NA	NA	NA	NA	NA	NA	NA	NA	NA	NA	NA	NA	NA	NA	NA	NA	NA	NA	NA	NA	NA	NA	NA	NA	NA	NA	NA	NA	NA	NA	NA	NA	NA	NA	NA	NA	NA
GO_DNA_METHYLATION	NA	NA	NA	NA	NA	NA	NA	NA	NA	NA	NA	NA	NA	NA	NA	NA	NA	NA	NA	NA	NA	NA	0.0213091	0.101727	NA	NA	NA	NA	NA	NA	NA	NA	NA	NA	NA	NA	NA	NA	NA	NA	NA	NA	NA	NA	NA	NA	NA	NA	NA
GO_DNA_METHYLATION_DEPENDENT_HETEROCHROMATIN_ASSEMBLY	NA	NA	NA	NA	NA	NA	NA	NA	NA	NA	NA	NA	NA	NA	NA	NA	NA	NA	NA	NA	NA	NA	NA	NA	NA	NA	NA	NA	NA	NA	0.0225251	NA	NA	NA	NA	NA	NA	NA	NA	NA	NA	NA	NA	0.0192852	NA	NA	NA	NA	NA
GO_DNA_METHYLATION_OR_DEMETHYLATION	NA	NA	NA	NA	NA	NA	NA	NA	NA	NA	NA	NA	NA	NA	NA	NA	NA	NA	NA	NA	NA	NA	0.00784979	0.160417	NA	NA	NA	NA	NA	NA	NA	NA	NA	NA	NA	NA	NA	NA	NA	NA	NA	NA	NA	NA	NA	NA	NA	NA	NA
GO_DNA_MODIFICATION	NA	NA	0.783362	0.018177	NA	NA	NA	NA	NA	NA	NA	NA	NA	NA	NA	NA	NA	NA	NA	NA	NA	NA	0.015618	0.218264	NA	NA	NA	NA	0.0136901	0.3192	0.410569	0.0323725	NA	NA	0.0334341	0.0882285	NA	NA	NA	NA	0.0379179	0.274037	NA	NA	NA	NA	NA	NA	NA
GO_DNA_N_GLYCOSYLASE_ACTIVITY	NA	NA	NA	NA	NA	NA	NA	NA	NA	NA	NA	NA	NA	NA	NA	NA	NA	NA	NA	NA	NA	NA	NA	NA	NA	NA	NA	NA	NA	NA	NA	0.00719909	NA	NA	NA	NA	NA	NA	NA	NA	NA	NA	NA	NA	NA	NA	NA	NA	NA
GO_DNA_POLYMERASE_ACTIVITY	0.0280184	NA	NA	NA	NA	NA	NA	NA	NA	NA	NA	0.0332784	NA	NA	NA	NA	NA	NA	0.117301	0.0238214	NA	NA	NA	NA	NA	NA	0.00523739	0.255607	NA	NA	NA	NA	NA	NA	NA	NA	NA	NA	NA	NA	NA	NA	NA	NA	NA	NA	NA	NA	NA
GO_DNA_POLYMERASE_COMPLEX	NA	NA	NA	NA	NA	NA	NA	NA	NA	NA	NA	NA	NA	NA	NA	NA	NA	NA	NA	NA	NA	NA	NA	NA	NA	NA	NA	NA	NA	NA	0.228132	0.0201031	NA	NA	NA	NA	NA	NA	NA	NA	NA	NA	NA	NA	NA	NA	NA	NA	NA
GO_DNA_RECOMBINATION	NA	NA	NA	NA	NA	NA	NA	NA	NA	NA	NA	NA	NA	NA	NA	NA	NA	NA	NA	NA	NA	NA	NA	NA	0.00456787	0.131371	NA	NA	NA	NA	0.671271	0.000188118	0.0780358	0.00959253	0.950444	0.015024	NA	NA	NA	NA	NA	NA	NA	NA	NA	NA	NA	NA	0.653923
GO_DNA_REPAIR_COMPLEX	NA	NA	NA	NA	0.0121704	0.43903	NA	NA	NA	NA	NA	NA	NA	NA	NA	NA	NA	NA	NA	NA	NA	NA	NA	NA	NA	NA	NA	NA	NA	NA	NA	NA	NA	NA	NA	NA	NA	NA	NA	NA	NA	NA	NA	NA	NA	NA	NA	NA	NA
GO_DNA_REPLICATION	NA	NA	NA	NA	NA	NA	NA	NA	0.356481	0.0200156	NA	NA	0.0447	0.802699	NA	NA	NA	NA	NA	NA	NA	NA	0.371222	0.049992	0.0381306	0.45412	0.0135312	0.259687	NA	NA	NA	NA	NA	NA	NA	NA	NA	NA	NA	NA	NA	NA	NA	NA	NA	NA	0.326465	0.0243593	NA
GO_DNA_REPLICATION_CHECKPOINT	NA	NA	NA	NA	0.0173331	NA	NA	0.0274991	NA	NA	NA	NA	NA	NA	NA	NA	NA	NA	NA	NA	NA	NA	NA	NA	NA	NA	NA	NA	NA	NA	NA	NA	NA	NA	NA	NA	NA	NA	NA	NA	NA	NA	NA	NA	NA	NA	NA	NA	NA
GO_DNA_REPLICATION_INDEPENDENT_NUCLEOSOME_ORGANIZATION	NA	NA	NA	NA	NA	NA	NA	NA	NA	NA	NA	NA	NA	NA	NA	NA	NA	NA	NA	NA	NA	NA	NA	NA	0.00367083	0.390266	NA	NA	NA	NA	NA	NA	NA	NA	NA	NA	NA	NA	NA	NA	NA	NA	NA	NA	NA	NA	NA	NA	NA
GO_DNA_REPLICATION_INITIATION	NA	NA	NA	NA	NA	NA	NA	NA	NA	NA	NA	NA	NA	NA	NA	NA	NA	NA	0.0377798	NA	NA	NA	NA	NA	NA	NA	NA	NA	NA	NA	NA	NA	NA	NA	NA	NA	NA	NA	NA	NA	NA	NA	NA	NA	NA	NA	NA	NA	NA
GO_DNA_REPLICATION_ORIGIN_BINDING	NA	NA	NA	NA	NA	NA	NA	NA	0.00754336	0.288736	NA	NA	NA	NA	NA	NA	NA	NA	0.00914309	NA	0.0419459	NA	NA	NA	NA	NA	NA	NA	NA	NA	0.0293163	0.206252	NA	NA	NA	NA	NA	NA	NA	NA	NA	NA	NA	NA	NA	0.0373621	NA	NA	NA
GO_DNA_SECONDARY_STRUCTURE_BINDING	NA	NA	NA	NA	NA	NA	NA	NA	NA	NA	NA	NA	NA	NA	NA	NA	NA	NA	NA	NA	NA	NA	NA	0.0254611	NA	NA	NA	NA	NA	NA	NA	NA	NA	NA	NA	NA	NA	NA	NA	NA	NA	NA	NA	NA	NA	NA	NA	NA	NA
GO_DNA_STRAND_ELONGATION	NA	NA	NA	0.042297	NA	NA	NA	NA	NA	NA	NA	NA	NA	NA	NA	NA	NA	NA	NA	NA	NA	NA	NA	NA	NA	NA	NA	NA	NA	NA	NA	NA	NA	NA	NA	NA	NA	NA	NA	NA	NA	NA	NA	NA	NA	NA	NA	NA	NA
GO_DNA_STRAND_ELONGATION_INVOLVED_IN_DNA_REPLICATION	NA	NA	NA	0.0235713	NA	NA	NA	NA	NA	NA	NA	NA	NA	NA	NA	NA	NA	NA	NA	NA	NA	NA	NA	NA	NA	NA	NA	NA	NA	NA	NA	NA	NA	NA	NA	NA	NA	NA	NA	NA	NA	NA	NA	NA	NA	NA	NA	NA	NA
GO_DNA_TEMPLATED_TRANSCRIPTION_ELONGATION	NA	NA	NA	NA	0.163375	0.00655621	NA	NA	NA	NA	0.040135	0.661324	0.0275594	0.543565	NA	NA	NA	NA	0.180412	0.00896263	NA	NA	NA	NA	NA	NA	NA	NA	0.0409753	0.10028	NA	NA	NA	NA	0.112744	0.0189676	NA	NA	NA	NA	NA	NA	NA	NA	NA	NA	0.319703	0.0322743	NA
GO_DNA_TEMPLATED_TRANSCRIPTION_INITIATION	NA	NA	NA	NA	NA	NA	0.048967	0.185903	NA	NA	NA	NA	NA	NA	NA	NA	NA	NA	NA	NA	NA	NA	NA	NA	NA	NA	NA	NA	NA	NA	NA	NA	NA	NA	NA	NA	NA	NA	NA	NA	NA	NA	NA	NA	NA	NA	NA	NA	NA
GO_DNA_TEMPLATED_TRANSCRIPTION_TERMINATION	NA	NA	NA	NA	NA	NA	NA	NA	0.739651	0.024599	NA	NA	0.0407962	0.327849	0.0369091	0.571974	NA	NA	NA	NA	NA	NA	NA	NA	NA	NA	NA	NA	0.0338039	0.161399	NA	NA	NA	NA	NA	NA	NA	NA	NA	NA	NA	NA	NA	NA	NA	NA	NA	NA	NA
GO_DNA_UNWINDING_INVOLVED_IN_DNA_REPLICATION	NA	NA	NA	0.016956	NA	NA	NA	NA	NA	NA	NA	NA	NA	NA	NA	NA	NA	NA	NA	NA	NA	NA	NA	NA	NA	NA	NA	NA	NA	NA	NA	NA	NA	NA	NA	NA	NA	NA	NA	NA	NA	NA	NA	NA	NA	NA	NA	NA	NA
GO_DOPAMINE_RECEPTOR_BINDING	NA	NA	NA	NA	NA	NA	NA	NA	NA	NA	NA	NA	NA	NA	NA	NA	NA	0.00323725	NA	NA	NA	NA	NA	NA	NA	NA	NA	NA	NA	NA	NA	NA	NA	NA	NA	NA	NA	NA	NA	NA	NA	NA	NA	NA	NA	NA	NA	NA	NA
GO_DOPAMINE_RECEPTOR_SIGNALING_PATHWAY	NA	NA	NA	NA	NA	NA	NA	NA	NA	NA	NA	NA	NA	NA	NA	NA	NA	0.0370293	NA	NA	NA	NA	NA	NA	NA	NA	NA	NA	NA	NA	NA	NA	NA	NA	NA	NA	NA	NA	NA	NA	NA	NA	NA	NA	NA	NA	NA	NA	NA
GO_DOPAMINERGIC_NEURON_DIFFERENTIATION	NA	NA	NA	NA	NA	NA	NA	NA	NA	NA	NA	NA	NA	NA	NA	NA	NA	NA	NA	NA	NA	NA	NA	NA	NA	NA	NA	NA	NA	NA	NA	NA	NA	NA	NA	NA	NA	NA	NA	NA	NA	NA	NA	NA	NA	NA	NA	NA	0.0317715
GO_DORSAL_AORTA_DEVELOPMENT	NA	NA	NA	NA	NA	NA	NA	NA	0.012865	NA	NA	NA	NA	NA	NA	NA	NA	NA	NA	NA	NA	NA	NA	NA	NA	NA	NA	NA	NA	NA	NA	NA	NA	NA	NA	NA	NA	NA	NA	NA	NA	NA	NA	NA	NA	NA	NA	NA	NA
GO_DORSAL_VENTRAL_NEURAL_TUBE_PATTERNING	NA	NA	NA	NA	NA	NA	NA	NA	NA	NA	NA	NA	NA	NA	NA	NA	NA	NA	NA	NA	NA	NA	NA	NA	NA	NA	NA	NA	NA	NA	NA	NA	NA	NA	NA	NA	NA	NA	NA	NA	NA	NA	NA	NA	NA	NA	NA	NA	NA
GO_DORSAL_VENTRAL_PATTERN_FORMATION	0.0429093	NA	NA	NA	NA	NA	NA	NA	NA	NA	0.0191682	0.209676	NA	NA	NA	NA	NA	NA	NA	NA	NA	NA	NA	NA	NA	NA	NA	NA	NA	NA	NA	NA	NA	NA	NA	0.0469054	NA	NA	NA	NA	NA	NA	NA	NA	NA	NA	NA	NA	NA
GO_DOUBLE_STRAND_BREAK_REPAIR	NA	NA	0.645631	0.0185289	NA	NA	0.0264972	0.110415	0.019047	0.743279	NA	NA	NA	NA	NA	NA	NA	NA	NA	NA	NA	NA	NA	NA	0.000558151	0.427802	NA	NA	NA	NA	0.0879177	0.000314444	NA	NA	0.931118	0.00836056	NA	NA	NA	NA	NA	NA	0.602895	0.0236372	NA	NA	0.466947	0.0192771	0.31767
GO_DOUBLE_STRANDED_RNA_BINDING	NA	NA	0.620001	4.89107e-05	NA	NA	0.123812	0.0295993	0.152596	0.0256751	NA	NA	NA	NA	NA	NA	NA	NA	NA	NA	NA	NA	NA	NA	0.0152718	0.501769	0.583493	0.0354954	NA	NA	0.591713	0.0405425	NA	0.00707108	NA	0.00444099	NA	NA	NA	NA	NA	NA	NA	NA	NA	NA	0.00192859	0.688823	0.438691
GO_DRUG_BINDING	NA	NA	NA	NA	NA	NA	0.0264442	NA	NA	NA	NA	NA	NA	NA	NA	NA	NA	NA	NA	NA	NA	NA	NA	NA	NA	NA	NA	NA	NA	NA	NA	NA	NA	NA	NA	NA	NA	NA	NA	NA	NA	NA	NA	NA	NA	NA	NA	NA	0.044282
GO_DRUG_CATABOLIC_PROCESS	NA	NA	NA	NA	NA	NA	NA	NA	NA	NA	NA	NA	NA	NA	NA	NA	NA	NA	NA	NA	NA	NA	NA	NA	NA	NA	NA	NA	NA	NA	NA	NA	NA	NA	NA	NA	NA	NA	NA	NA	NA	NA	0.0377045	NA	NA	NA	NA	NA	NA
GO_DRUG_METABOLIC_PROCESS	0.323009	0.0268344	NA	NA	NA	NA	NA	NA	NA	NA	NA	NA	NA	NA	NA	NA	NA	NA	NA	NA	NA	NA	NA	NA	NA	NA	NA	NA	NA	NA	NA	NA	NA	NA	NA	NA	NA	NA	NA	NA	NA	NA	1.6345e-05	NA	NA	NA	NA	NA	NA
GO_DYNACTIN_BINDING	NA	NA	NA	NA	NA	NA	NA	NA	NA	NA	NA	NA	NA	NA	NA	NA	NA	NA	NA	NA	NA	NA	NA	NA	NA	NA	NA	NA	NA	NA	NA	NA	0.00625538	0.113507	NA	NA	NA	NA	NA	NA	NA	NA	NA	NA	NA	NA	NA	NA	NA
GO_DYNEIN_COMPLEX	NA	NA	NA	NA	NA	NA	NA	NA	NA	NA	NA	NA	NA	NA	NA	NA	NA	NA	NA	NA	NA	NA	NA	NA	NA	NA	NA	NA	NA	NA	NA	NA	0.0163778	0.41298	NA	NA	NA	NA	NA	NA	NA	NA	NA	NA	NA	NA	NA	NA	NA
GO_DYNEIN_COMPLEX_BINDING	NA	NA	NA	NA	NA	NA	NA	0.0481768	NA	0.00447367	NA	NA	NA	NA	NA	NA	NA	NA	NA	NA	NA	NA	NA	NA	NA	NA	NA	NA	NA	NA	NA	NA	0.208159	0.00149901	NA	NA	NA	NA	NA	NA	NA	NA	NA	NA	0.239921	0.0373621	NA	NA	NA
GO_DYNEIN_HEAVY_CHAIN_BINDING	NA	NA	NA	NA	NA	NA	0.0206774	0.194994	NA	NA	NA	NA	NA	NA	NA	NA	NA	NA	NA	NA	NA	NA	NA	NA	NA	NA	NA	NA	NA	NA	NA	NA	NA	NA	NA	NA	NA	NA	NA	NA	NA	NA	NA	NA	NA	NA	NA	NA	NA
GO_DYNEIN_INTERMEDIATE_CHAIN_BINDING	NA	NA	NA	NA	NA	NA	0.0121543	0.37186	NA	NA	NA	NA	NA	NA	NA	NA	NA	NA	NA	NA	NA	NA	NA	NA	NA	NA	NA	NA	NA	NA	NA	NA	NA	NA	NA	0.0281749	NA	NA	NA	NA	NA	NA	NA	NA	NA	NA	NA	NA	NA
GO_DYNEIN_LIGHT_INTERMEDIATE_CHAIN_BINDING	NA	NA	NA	NA	NA	NA	NA	NA	NA	NA	NA	NA	NA	NA	NA	NA	NA	NA	NA	NA	NA	NA	NA	NA	0.0144877	0.21901	NA	NA	NA	NA	NA	NA	NA	NA	NA	0.0231245	NA	NA	NA	NA	NA	NA	NA	NA	NA	NA	NA	NA	NA
GO_DYSTROGLYCAN_BINDING	NA	NA	NA	NA	NA	0.00853884	0.149796	0.00976468	NA	NA	NA	NA	0.0249441	NA	NA	NA	NA	1.96988e-05	NA	NA	NA	NA	NA	NA	NA	NA	NA	NA	0.0108653	0.0917309	NA	NA	NA	NA	NA	NA	NA	NA	NA	NA	NA	NA	NA	NA	NA	NA	NA	NA	NA
GO_E_BOX_BINDING	NA	NA	NA	NA	NA	NA	NA	NA	0.222486	0.00618729	NA	NA	NA	NA	NA	NA	NA	NA	NA	NA	NA	0.0452175	NA	NA	NA	NA	NA	NA	NA	NA	NA	NA	NA	NA	NA	NA	NA	NA	NA	NA	NA	NA	NA	NA	0.449428	0.0290912	NA	NA	NA
GO_EAR_DEVELOPMENT	NA	NA	NA	NA	NA	NA	NA	NA	NA	NA	NA	NA	NA	NA	NA	NA	NA	NA	NA	NA	NA	NA	NA	NA	NA	NA	NA	NA	NA	NA	NA	NA	NA	NA	NA	NA	NA	NA	NA	NA	NA	NA	NA	NA	NA	NA	NA	NA	NA
GO_EARLY_ENDOSOME	NA	NA	NA	NA	0.833745	0.00849628	0.859406	0.0320834	NA	NA	0.00953756	0.271622	NA	NA	NA	NA	NA	NA	0.00604481	0.98239	NA	NA	0.183107	0.0208018	NA	NA	NA	NA	NA	NA	NA	NA	NA	NA	NA	NA	NA	NA	NA	NA	0.834273	0.0294877	NA	NA	NA	NA	NA	NA	0.544674
GO_EARLY_ENDOSOME_MEMBRANE	NA	NA	NA	NA	0.578169	0.0287458	NA	NA	NA	NA	0.00214361	NA	NA	NA	NA	NA	NA	NA	NA	NA	NA	NA	NA	NA	NA	NA	NA	NA	NA	NA	NA	NA	NA	NA	NA	NA	NA	NA	NA	NA	0.918245	0.0363107	NA	NA	NA	NA	NA	NA	NA
GO_ECTODERM_DEVELOPMENT	NA	NA	NA	NA	NA	NA	NA	NA	NA	NA	NA	NA	NA	NA	NA	NA	NA	NA	NA	NA	NA	NA	NA	NA	NA	NA	NA	NA	NA	NA	NA	NA	NA	NA	NA	0.0156578	NA	NA	NA	NA	NA	NA	NA	NA	NA	NA	NA	NA	NA
GO_ELASTIC_FIBER_ASSEMBLY	NA	NA	NA	NA	0.00606052	NA	NA	NA	NA	NA	NA	NA	NA	NA	NA	NA	NA	NA	NA	NA	NA	NA	NA	NA	NA	NA	NA	NA	NA	NA	NA	NA	NA	NA	NA	NA	NA	NA	NA	NA	NA	NA	NA	NA	NA	NA	NA	NA	NA
GO_ELECTRON_TRANSPORT_CHAIN	NA	NA	NA	NA	NA	NA	NA	NA	NA	NA	NA	NA	NA	NA	NA	NA	NA	NA	NA	NA	NA	NA	NA	NA	NA	NA	NA	NA	NA	NA	NA	NA	NA	NA	NA	NA	NA	NA	NA	NA	NA	NA	NA	NA	NA	NA	NA	NA	NA
GO_EMBRYO_IMPLANTATION	NA	NA	0.0369062	0.521966	NA	NA	NA	NA	NA	NA	NA	NA	NA	NA	NA	NA	NA	NA	NA	NA	NA	NA	NA	NA	NA	NA	NA	NA	NA	NA	NA	NA	NA	NA	NA	NA	NA	NA	NA	NA	NA	NA	NA	NA	NA	NA	NA	NA	NA
GO_EMBRYONIC_APPENDAGE_MORPHOGENESIS	NA	NA	NA	NA	NA	NA	NA	NA	NA	NA	NA	NA	NA	NA	NA	NA	NA	NA	NA	NA	NA	NA	NA	NA	NA	NA	NA	NA	NA	NA	NA	NA	NA	NA	NA	NA	NA	NA	NA	NA	NA	NA	NA	NA	NA	NA	0.173862	0.00332341	NA
GO_EMBRYONIC_AXIS_SPECIFICATION	NA	NA	NA	NA	NA	NA	NA	NA	NA	NA	NA	NA	NA	NA	NA	NA	NA	NA	NA	NA	NA	NA	NA	NA	NA	NA	NA	NA	NA	NA	NA	NA	NA	NA	NA	0.0456156	NA	NA	NA	NA	NA	NA	NA	NA	NA	NA	NA	NA	NA
GO_EMBRYONIC_BODY_MORPHOGENESIS	NA	NA	NA	NA	NA	NA	NA	NA	0.015541	NA	NA	NA	NA	NA	0.0138648	NA	NA	NA	0.190667	0.0196172	NA	NA	NA	NA	NA	NA	NA	NA	0.000636415	0.10043	NA	NA	NA	NA	NA	NA	NA	NA	NA	NA	0.156683	0.011512	NA	NA	NA	NA	NA	NA	NA
GO_EMBRYONIC_BRAIN_DEVELOPMENT	0.0051887	NA	NA	NA	NA	NA	NA	NA	NA	NA	NA	NA	NA	NA	NA	NA	NA	NA	NA	NA	NA	NA	NA	NA	NA	NA	NA	NA	NA	NA	NA	NA	NA	NA	NA	NA	NA	NA	NA	NA	NA	NA	NA	NA	NA	NA	NA	NA	NA
GO_EMBRYONIC_CAMERA_TYPE_EYE_DEVELOPMENT	NA	NA	NA	NA	NA	NA	NA	NA	NA	NA	NA	NA	NA	NA	NA	NA	NA	NA	NA	NA	NA	NA	NA	NA	0.038296	0.300345	NA	NA	NA	NA	NA	NA	NA	NA	0.326941	0.00476608	NA	NA	NA	NA	NA	NA	NA	NA	NA	NA	NA	NA	NA
GO_EMBRYONIC_CAMERA_TYPE_EYE_FORMATION	NA	NA	NA	NA	NA	NA	NA	NA	NA	NA	NA	NA	NA	NA	NA	NA	NA	NA	NA	NA	NA	NA	NA	NA	0.0212549	NA	NA	NA	NA	NA	NA	NA	NA	NA	NA	NA	NA	NA	NA	NA	NA	NA	NA	NA	NA	NA	NA	NA	NA
GO_EMBRYONIC_CAMERA_TYPE_EYE_MORPHOGENESIS	NA	NA	NA	NA	NA	NA	NA	NA	NA	NA	NA	NA	NA	NA	NA	NA	NA	NA	NA	NA	NA	NA	NA	NA	0.0160005	0.226133	NA	NA	NA	NA	NA	NA	NA	NA	0.247362	0.0247623	NA	NA	NA	NA	NA	NA	NA	NA	NA	NA	NA	NA	NA
GO_EMBRYONIC_CRANIAL_SKELETON_MORPHOGENESIS	NA	NA	NA	NA	NA	NA	NA	NA	NA	NA	NA	NA	NA	NA	NA	NA	NA	NA	NA	NA	NA	NA	NA	NA	NA	NA	NA	NA	NA	NA	NA	NA	NA	NA	NA	NA	NA	NA	NA	NA	NA	NA	NA	NA	NA	NA	NA	NA	0.305429
GO_EMBRYONIC_DIGIT_MORPHOGENESIS	NA	NA	NA	NA	NA	NA	NA	NA	NA	NA	NA	NA	NA	NA	NA	NA	NA	NA	NA	NA	NA	NA	NA	NA	NA	NA	NA	NA	NA	NA	NA	NA	NA	NA	NA	NA	NA	NA	NA	NA	NA	NA	NA	NA	NA	NA	NA	NA	NA
GO_EMBRYONIC_EYE_MORPHOGENESIS	NA	NA	NA	NA	NA	NA	NA	NA	NA	NA	NA	NA	NA	NA	NA	NA	NA	NA	NA	NA	NA	NA	NA	NA	0.0334745	0.287399	NA	NA	NA	NA	NA	NA	NA	NA	0.313122	0.0414632	NA	NA	NA	NA	NA	NA	NA	NA	NA	NA	NA	NA	NA
GO_EMBRYONIC_FORELIMB_MORPHOGENESIS	NA	NA	NA	NA	NA	NA	NA	NA	NA	NA	NA	NA	NA	NA	NA	NA	NA	NA	NA	NA	NA	NA	NA	NA	NA	NA	NA	NA	NA	NA	NA	NA	NA	NA	NA	NA	NA	NA	NA	NA	NA	NA	NA	NA	NA	NA	NA	0.0135761	NA
GO_EMBRYONIC_HEMOPOIESIS	NA	NA	0.0337459	0.253543	NA	NA	NA	NA	NA	NA	NA	NA	NA	NA	NA	NA	NA	NA	NA	NA	NA	NA	NA	NA	NA	NA	NA	NA	NA	NA	NA	NA	NA	NA	NA	NA	NA	NA	NA	NA	NA	NA	NA	NA	NA	0.0373621	0.32806	0.0473079	NA
GO_EMBRYONIC_ORGAN_DEVELOPMENT	NA	NA	NA	NA	NA	NA	NA	NA	NA	NA	NA	NA	NA	NA	NA	NA	NA	NA	NA	NA	NA	NA	NA	NA	NA	NA	NA	NA	NA	NA	NA	NA	NA	NA	0.836739	0.0450728	NA	NA	NA	NA	NA	NA	NA	NA	NA	NA	NA	NA	NA
GO_EMBRYONIC_PLACENTA_DEVELOPMENT	NA	NA	NA	NA	NA	NA	NA	NA	NA	NA	NA	NA	NA	NA	NA	NA	NA	NA	NA	NA	NA	NA	NA	NA	NA	NA	NA	NA	NA	NA	NA	NA	NA	NA	NA	NA	NA	NA	NA	NA	NA	NA	NA	NA	NA	NA	NA	NA	NA
GO_ENDOCARDIAL_CUSHION_DEVELOPMENT	NA	NA	NA	NA	NA	NA	NA	NA	NA	NA	NA	NA	NA	NA	NA	NA	NA	NA	NA	NA	NA	NA	NA	NA	NA	NA	NA	NA	NA	NA	NA	NA	NA	NA	NA	NA	NA	NA	NA	NA	NA	NA	NA	NA	NA	NA	0.54083	0.0309229	NA
GO_ENDOCARDIAL_CUSHION_MORPHOGENESIS	NA	NA	NA	NA	NA	NA	NA	NA	NA	NA	NA	NA	NA	NA	NA	NA	NA	NA	NA	NA	NA	NA	NA	NA	NA	NA	NA	NA	NA	NA	NA	NA	NA	NA	0.0484881	0.264863	NA	NA	NA	NA	NA	NA	NA	NA	NA	NA	NA	NA	NA
GO_ENDOCARDIUM_DEVELOPMENT	NA	NA	NA	NA	NA	NA	NA	NA	0.015541	NA	NA	NA	NA	NA	NA	NA	NA	NA	NA	NA	NA	NA	NA	NA	NA	NA	NA	NA	NA	NA	NA	NA	NA	NA	NA	NA	NA	NA	NA	NA	NA	NA	NA	NA	NA	NA	NA	NA	NA
GO_ENDOCHONDRAL_BONE_MORPHOGENESIS	NA	NA	NA	NA	NA	NA	NA	NA	NA	NA	NA	NA	NA	NA	NA	NA	NA	NA	NA	NA	NA	NA	0.00961875	0.0610752	NA	NA	NA	NA	NA	NA	NA	NA	NA	NA	NA	NA	NA	NA	NA	NA	NA	NA	NA	NA	NA	NA	NA	NA	NA
GO_ENDOCYTIC_RECYCLING	NA	0.0313116	NA	NA	NA	NA	NA	NA	NA	NA	NA	NA	NA	NA	NA	NA	NA	NA	NA	NA	NA	NA	NA	NA	NA	NA	NA	NA	NA	0.012167	NA	NA	NA	NA	NA	NA	NA	NA	NA	NA	NA	NA	NA	NA	NA	NA	NA	NA	0.315911
GO_ENDOCYTIC_VESICLE	NA	NA	NA	NA	NA	NA	0.24092	0.0234409	NA	NA	0.0236765	0.789153	0.0135263	0.542797	NA	NA	0.117276	0.0265315	0.0173175	0.294075	NA	NA	NA	NA	NA	NA	NA	NA	NA	NA	NA	NA	NA	NA	NA	NA	0.552712	0.00808859	NA	NA	NA	NA	NA	NA	NA	NA	NA	NA	NA
GO_ENDOCYTIC_VESICLE_LUMEN	NA	NA	0.0259755	0.224507	NA	NA	NA	NA	NA	NA	NA	NA	NA	NA	NA	NA	NA	NA	NA	NA	NA	NA	NA	NA	NA	NA	NA	NA	NA	NA	NA	NA	NA	NA	NA	NA	NA	NA	NA	NA	NA	NA	NA	NA	NA	NA	NA	NA	NA
GO_ENDOCYTIC_VESICLE_MEMBRANE	NA	NA	NA	NA	NA	NA	0.271564	0.0413862	NA	NA	NA	NA	0.0234051	0.473934	NA	NA	NA	NA	NA	NA	NA	NA	NA	NA	NA	NA	NA	NA	NA	NA	NA	NA	NA	NA	NA	NA	0.782172	0.0172594	NA	NA	NA	NA	NA	NA	NA	NA	NA	NA	NA
GO_ENDODEOXYRIBONUCLEASE_ACTIVITY	NA	NA	NA	NA	NA	NA	NA	NA	NA	NA	NA	NA	NA	NA	NA	NA	NA	NA	NA	NA	NA	NA	NA	NA	NA	NA	NA	NA	NA	NA	NA	NA	NA	NA	NA	NA	NA	NA	NA	NA	NA	NA	NA	NA	NA	NA	NA	NA	NA
GO_ENDODEOXYRIBONUCLEASE_ACTIVITY_PRODUCING_3_PHOSPHOMONOESTERS	NA	NA	NA	NA	NA	NA	NA	NA	0.012865	0.137642	NA	NA	NA	NA	NA	NA	NA	NA	NA	NA	NA	NA	NA	NA	NA	NA	NA	NA	NA	NA	NA	NA	NA	NA	NA	NA	NA	NA	NA	NA	NA	NA	NA	NA	NA	NA	NA	NA	NA
GO_ENDODEOXYRIBONUCLEASE_ACTIVITY_PRODUCING_5_PHOSPHOMONOESTERS	NA	NA	NA	NA	NA	0.0241612	NA	NA	NA	NA	0.0148796	NA	NA	NA	NA	NA	NA	NA	NA	NA	NA	NA	NA	NA	0.0411379	0.144098	NA	NA	NA	NA	NA	NA	NA	NA	NA	NA	NA	NA	NA	NA	NA	NA	NA	NA	NA	NA	0.0335765	0.229507	NA
GO_ENDODERM_DEVELOPMENT	NA	NA	NA	NA	NA	NA	NA	NA	NA	NA	NA	NA	NA	NA	NA	NA	NA	NA	NA	NA	NA	NA	NA	NA	NA	NA	NA	0.00673243	0.0397665	NA	NA	NA	NA	NA	NA	NA	NA	NA	NA	NA	NA	NA	NA	NA	NA	NA	NA	NA	NA
GO_ENDODERM_FORMATION	NA	NA	NA	NA	NA	NA	NA	NA	NA	NA	NA	NA	NA	NA	NA	NA	NA	NA	NA	NA	NA	NA	NA	NA	NA	NA	NA	0.00182108	NA	NA	NA	NA	NA	NA	NA	NA	NA	NA	NA	NA	NA	NA	NA	NA	NA	NA	NA	NA	NA
GO_ENDODERMAL_CELL_DIFFERENTIATION	NA	NA	NA	NA	NA	NA	NA	NA	NA	NA	NA	NA	NA	NA	NA	NA	NA	NA	NA	NA	NA	NA	NA	NA	NA	NA	NA	0.000930864	NA	NA	NA	NA	NA	NA	NA	NA	NA	NA	NA	NA	NA	NA	NA	NA	NA	NA	NA	NA	NA
GO_ENDOLYSOSOME	NA	0.00540701	NA	0.0259755	NA	NA	NA	NA	NA	NA	NA	NA	0.0131803	0.270337	NA	NA	NA	0.000394244	NA	NA	NA	NA	NA	NA	NA	0.0140704	NA	NA	NA	NA	NA	NA	NA	NA	NA	NA	NA	0.0140704	NA	NA	0.00337481	NA	0.0230858	0.194699	NA	0.0287993	NA	NA	NA
GO_ENDOLYSOSOME_MEMBRANE	NA	NA	NA	NA	NA	NA	NA	NA	NA	NA	NA	NA	0.0472148	NA	NA	NA	NA	0.025371	NA	NA	NA	NA	NA	NA	NA	NA	NA	NA	NA	NA	NA	NA	NA	NA	NA	NA	NA	NA	NA	NA	0.018964	NA	NA	NA	NA	NA	NA	NA	NA
GO_ENDOMEMBRANE_SYSTEM_ORGANIZATION	0.0452099	0.481596	NA	NA	0.493161	0.0381321	NA	NA	NA	NA	NA	NA	NA	NA	NA	NA	0.596147	0.0225716	0.0180208	0.0517021	0.00742225	0.391924	NA	NA	NA	NA	NA	NA	0.0431538	0.0814622	NA	NA	0.698477	0.0194878	0.0081363	0.0537826	0.0296886	0.423087	0.0242934	0.108307	NA	NA	0.052855	0.0127882	NA	NA	NA	NA	NA
GO_ENDONUCLEASE_ACTIVITY	NA	NA	NA	NA	NA	NA	NA	NA	NA	NA	0.0468234	0.679826	NA	NA	0.872912	0.0488306	NA	NA	NA	NA	NA	NA	NA	NA	NA	NA	0.164023	0.0288442	NA	NA	NA	NA	NA	NA	NA	NA	NA	NA	NA	NA	NA	NA	NA	NA	NA	NA	0.00120867	0.846834	NA
GO_ENDONUCLEASE_ACTIVITY_ACTIVE_WITH_EITHER_RIBO_OR_DEOXYRIBONUCLEIC_ACIDS_AND_PRODUCING_3_PHOSPHOMONOESTERS	NA	NA	NA	NA	NA	NA	NA	NA	0.00371068	0.234027	NA	NA	NA	NA	NA	NA	NA	NA	NA	NA	NA	NA	NA	NA	NA	NA	0.0176585	NA	NA	NA	NA	NA	NA	NA	NA	NA	NA	NA	NA	NA	NA	NA	NA	NA	NA	NA	NA	NA	NA
GO_ENDONUCLEASE_ACTIVITY_ACTIVE_WITH_EITHER_RIBO_OR_DEOXYRIBONUCLEIC_ACIDS_AND_PRODUCING_5_PHOSPHOMONOESTERS	NA	NA	NA	0.0169254	NA	NA	NA	NA	NA	NA	0.00128658	0.330073	NA	NA	NA	NA	NA	NA	NA	NA	NA	NA	NA	NA	NA	NA	NA	NA	NA	NA	NA	NA	NA	NA	NA	NA	NA	NA	NA	NA	NA	NA	NA	NA	NA	NA	0.000807188	0.483112	0.278522
GO_ENDONUCLEASE_COMPLEX	NA	NA	NA	0.0112603	NA	NA	NA	NA	0.0275996	0.422069	NA	NA	NA	NA	NA	NA	NA	NA	NA	NA	0.0155039	0.222681	NA	NA	NA	NA	0.346863	0.0478402	NA	NA	NA	NA	NA	NA	NA	0.0414632	NA	NA	NA	NA	NA	NA	NA	NA	NA	NA	0.000397485	NA	NA
GO_ENDOPEPTIDASE_ACTIVITY	0.167364	0.0352907	0.653358	0.00144808	NA	NA	NA	NA	NA	NA	NA	NA	NA	NA	NA	NA	NA	NA	NA	NA	0.288628	0.00306083	NA	NA	0.605936	0.0481776	NA	NA	NA	NA	NA	NA	NA	NA	NA	NA	0.00765388	0.766316	NA	NA	NA	NA	0.0369985	0.512263	NA	NA	NA	NA	NA
GO_ENDOPEPTIDASE_COMPLEX	NA	NA	NA	0.0112958	0.56606	0.017248	NA	0.00417774	0.0342405	NA	NA	NA	NA	NA	NA	NA	0.662134	0.00797547	NA	NA	NA	NA	NA	NA	NA	NA	NA	NA	NA	NA	NA	NA	NA	NA	NA	NA	NA	NA	NA	NA	NA	NA	NA	NA	NA	NA	NA	NA	NA
GO_ENDOPLASMIC_RETICULUM_CALCIUM_ION_HOMEOSTASIS	NA	NA	NA	NA	NA	NA	NA	NA	NA	NA	NA	NA	NA	NA	0.332871	0.0294543	NA	NA	0.369795	0.0012367	NA	NA	NA	0.0131336	NA	NA	NA	NA	NA	NA	NA	NA	NA	NA	NA	NA	NA	NA	NA	NA	NA	NA	NA	NA	NA	NA	NA	NA	NA
GO_ENDOPLASMIC_RETICULUM_EXIT_SITE	NA	NA	NA	NA	NA	NA	NA	NA	NA	NA	NA	NA	NA	NA	NA	NA	0.0144556	0.450328	0.0245041	NA	NA	NA	NA	NA	0.00348889	NA	NA	NA	NA	NA	NA	NA	NA	NA	NA	NA	0.0369588	0.260789	NA	NA	NA	NA	NA	0.00528638	NA	NA	NA	NA	NA
GO_ENDOPLASMIC_RETICULUM_GOLGI_INTERMEDIATE_COMPARTMENT	NA	NA	NA	NA	NA	NA	0.157881	0.0153101	NA	NA	NA	NA	0.0465664	0.605555	NA	NA	NA	NA	NA	NA	0.038398	0.220355	NA	NA	0.039143	0.332085	NA	NA	0.0195719	0.128911	NA	NA	NA	NA	NA	NA	NA	NA	NA	NA	0.322736	0.0481247	NA	NA	NA	NA	0.00713536	0.590885	NA
GO_ENDOPLASMIC_RETICULUM_GOLGI_INTERMEDIATE_COMPARTMENT_MEMBRANE	NA	NA	NA	NA	NA	NA	NA	NA	NA	NA	NA	NA	0.0115616	NA	NA	NA	NA	NA	NA	NA	NA	NA	NA	NA	NA	NA	NA	NA	0.00749396	0.514624	NA	NA	NA	NA	NA	NA	NA	NA	NA	NA	0.687718	0.027177	NA	NA	NA	NA	NA	NA	NA
GO_ENDOPLASMIC_RETICULUM_LUMEN	NA	NA	NA	NA	NA	NA	NA	NA	NA	NA	NA	NA	NA	NA	NA	NA	NA	NA	NA	NA	NA	NA	NA	NA	NA	NA	NA	NA	NA	NA	NA	NA	0.0129386	0.367727	NA	NA	NA	NA	NA	NA	NA	NA	NA	NA	NA	NA	NA	NA	NA
GO_ENDOPLASMIC_RETICULUM_MANNOSE_TRIMMING	NA	NA	NA	NA	NA	NA	0.0266982	NA	NA	NA	NA	NA	NA	NA	NA	NA	NA	NA	NA	NA	NA	NA	NA	NA	NA	NA	NA	NA	NA	NA	NA	NA	NA	NA	NA	NA	NA	NA	NA	NA	NA	NA	NA	NA	NA	NA	NA	NA	NA
GO_ENDOPLASMIC_RETICULUM_ORGANIZATION	NA	NA	NA	NA	0.576453	0.0189632	NA	NA	NA	NA	NA	NA	NA	NA	NA	NA	NA	NA	0.0464538	0.418677	NA	NA	NA	NA	NA	NA	NA	NA	NA	NA	NA	NA	NA	NA	NA	NA	NA	NA	NA	NA	NA	NA	0.571693	0.0411937	NA	NA	0.0335278	0.293962	NA
GO_ENDOPLASMIC_RETICULUM_SUBCOMPARTMENT	NA	NA	NA	NA	NA	NA	NA	NA	NA	NA	NA	NA	NA	NA	NA	NA	NA	NA	NA	NA	NA	NA	NA	NA	NA	NA	NA	NA	NA	NA	NA	NA	NA	NA	NA	NA	NA	NA	NA	NA	NA	NA	NA	NA	NA	NA	NA	NA	NA
GO_ENDOPLASMIC_RETICULUM_TO_CYTOSOL_TRANSPORT	NA	NA	NA	NA	NA	NA	NA	NA	NA	NA	NA	NA	NA	NA	NA	NA	NA	NA	NA	NA	NA	NA	NA	NA	NA	NA	NA	NA	NA	NA	NA	NA	NA	NA	NA	NA	NA	NA	NA	NA	NA	NA	NA	NA	0.0431852	NA	NA	NA	NA
GO_ENDOPLASMIC_RETICULUM_TO_GOLGI_VESICLE_MEDIATED_TRANSPORT	NA	NA	NA	NA	NA	NA	0.000529283	0.616167	NA	NA	NA	NA	0.0364523	0.104887	NA	NA	NA	NA	NA	NA	NA	NA	NA	NA	0.00214113	0.849656	NA	NA	0.00205734	0.589084	NA	NA	NA	NA	NA	NA	0.0122073	0.119347	NA	NA	0.0404082	0.203847	NA	NA	NA	NA	0.00930226	0.609297	NA
GO_ENDOPLASMIC_RETICULUM_TUBULAR_NETWORK	NA	NA	NA	NA	NA	NA	NA	NA	NA	NA	NA	NA	NA	NA	NA	NA	NA	NA	NA	NA	NA	NA	NA	NA	NA	NA	NA	NA	NA	NA	NA	NA	NA	NA	NA	NA	NA	NA	NA	NA	NA	NA	NA	NA	NA	NA	NA	NA	NA
GO_ENDOPLASMIC_RETICULUM_UNFOLDED_PROTEIN_RESPONSE	NA	NA	NA	NA	NA	NA	NA	NA	NA	NA	NA	NA	NA	NA	NA	NA	NA	NA	NA	NA	NA	NA	NA	NA	NA	NA	NA	NA	NA	NA	NA	NA	NA	NA	NA	NA	NA	NA	NA	NA	NA	NA	NA	NA	NA	NA	NA	NA	NA
GO_ENDORIBONUCLEASE_ACTIVITY	NA	NA	NA	0.0490364	NA	NA	NA	NA	NA	NA	0.0354232	0.454408	NA	NA	NA	NA	NA	NA	NA	NA	NA	NA	NA	NA	NA	NA	NA	NA	NA	NA	NA	NA	NA	NA	NA	NA	NA	NA	NA	NA	NA	NA	NA	NA	NA	NA	0.0252758	NA	NA
GO_ENDORIBONUCLEASE_ACTIVITY_PRODUCING_5_PHOSPHOMONOESTERS	NA	NA	NA	NA	NA	NA	NA	NA	NA	NA	0.00436098	0.243751	NA	NA	NA	NA	NA	NA	NA	NA	NA	NA	NA	NA	NA	NA	NA	0.0326137	NA	NA	NA	NA	NA	0.0359423	NA	NA	NA	NA	NA	NA	NA	NA	NA	NA	NA	NA	0.00162938	NA	NA
GO_ENDORIBONUCLEASE_COMPLEX	NA	NA	NA	0.0068848	NA	NA	NA	NA	NA	NA	0.0459976	0.250766	NA	NA	NA	NA	NA	NA	NA	NA	0.00954589	0.190244	NA	NA	NA	NA	NA	0.0346499	NA	NA	NA	NA	NA	NA	NA	0.0299479	NA	NA	NA	NA	NA	NA	NA	NA	NA	NA	0.000168522	NA	NA
GO_ENDOSOMAL_TRANSPORT	NA	NA	NA	NA	0.00948601	0.139334	NA	NA	NA	NA	NA	NA	NA	NA	NA	NA	NA	NA	0.0446903	0.220553	NA	NA	0.0459713	0.533609	NA	NA	NA	NA	NA	NA	NA	NA	NA	NA	NA	NA	NA	NA	NA	NA	NA	NA	NA	NA	NA	NA	NA	NA	0.0379724
GO_ENDOSOME_LUMEN	NA	0.0160445	NA	NA	NA	NA	NA	NA	NA	NA	0.323003	0.0415746	NA	NA	NA	NA	NA	0.0245821	NA	NA	NA	NA	NA	NA	NA	NA	NA	NA	NA	NA	NA	NA	NA	NA	NA	NA	NA	NA	NA	NA	NA	NA	NA	NA	NA	NA	NA	NA	NA
GO_ENDOSOME_ORGANIZATION	NA	NA	NA	NA	NA	NA	NA	NA	NA	NA	NA	NA	NA	NA	NA	NA	NA	NA	NA	NA	NA	NA	NA	NA	NA	NA	NA	NA	NA	NA	NA	NA	NA	NA	0.0457868	0.501083	NA	NA	NA	NA	NA	NA	NA	NA	NA	NA	NA	NA	NA
GO_ENDOSOME_TO_LYSOSOME_TRANSPORT	NA	NA	NA	NA	NA	NA	NA	NA	NA	NA	NA	NA	0.0442773	0.200803	NA	NA	NA	NA	NA	NA	NA	NA	NA	NA	NA	NA	NA	NA	NA	NA	NA	NA	NA	NA	NA	NA	NA	NA	NA	NA	NA	NA	NA	NA	NA	NA	NA	NA	NA
GO_ENDOSOME_TO_PLASMA_MEMBRANE_PROTEIN_TRANSPORT	NA	NA	NA	NA	NA	NA	NA	NA	NA	NA	NA	NA	NA	NA	NA	NA	NA	NA	NA	NA	NA	NA	NA	NA	NA	NA	NA	NA	NA	NA	NA	NA	NA	NA	NA	NA	NA	NA	NA	NA	NA	NA	NA	NA	NA	NA	NA	NA	NA
GO_ENDOTHELIAL_CELL_ACTIVATION	NA	NA	NA	NA	NA	NA	NA	NA	NA	NA	NA	NA	NA	NA	NA	NA	NA	NA	NA	NA	NA	NA	0.00395156	NA	NA	NA	NA	NA	NA	NA	NA	NA	NA	NA	NA	NA	NA	NA	NA	NA	NA	NA	NA	NA	NA	NA	NA	NA	NA
GO_ENDOTHELIAL_CELL_APOPTOTIC_PROCESS	NA	NA	NA	NA	NA	NA	NA	NA	NA	NA	NA	NA	NA	NA	NA	NA	NA	NA	NA	NA	NA	NA	NA	NA	NA	NA	NA	NA	NA	NA	NA	NA	NA	NA	NA	NA	NA	NA	0.0416928	NA	NA	NA	NA	NA	NA	NA	NA	NA	NA
GO_ENDOTHELIAL_CELL_CHEMOTAXIS	NA	0.0135194	NA	NA	NA	NA	NA	NA	NA	NA	NA	NA	NA	NA	NA	NA	NA	NA	NA	NA	NA	NA	NA	NA	NA	NA	NA	NA	NA	NA	0.313905	0.0404565	NA	NA	NA	0.0317641	NA	NA	NA	NA	NA	NA	NA	NA	NA	NA	NA	NA	0.0242468
GO_ENDOTHELIAL_CELL_DEVELOPMENT	NA	0.00538201	0.0471977	0.557163	NA	NA	0.0196407	NA	NA	NA	NA	NA	0.00541879	0.635676	NA	NA	NA	NA	NA	NA	NA	NA	NA	NA	NA	NA	NA	NA	NA	NA	NA	NA	NA	NA	NA	NA	0.0212396	0.443731	NA	NA	NA	NA	NA	NA	NA	NA	NA	NA	NA
GO_ENDOTHELIAL_CELL_MIGRATION	NA	NA	NA	NA	NA	NA	NA	NA	NA	NA	NA	NA	NA	NA	NA	NA	NA	NA	NA	NA	NA	NA	NA	NA	NA	NA	NA	NA	NA	NA	NA	NA	NA	NA	NA	NA	NA	NA	NA	NA	NA	NA	NA	NA	NA	NA	NA	NA	NA
GO_ENDOTHELIAL_CELL_PROLIFERATION	NA	NA	NA	NA	NA	NA	NA	NA	NA	NA	NA	NA	NA	NA	NA	NA	NA	NA	NA	NA	NA	NA	NA	NA	NA	NA	NA	NA	NA	NA	NA	NA	NA	NA	NA	NA	NA	NA	NA	0.0225929	NA	NA	NA	NA	NA	NA	NA	NA	NA
GO_ENDOTHELIUM_DEVELOPMENT	NA	0.0391308	NA	NA	NA	NA	NA	NA	NA	NA	NA	NA	NA	NA	NA	NA	NA	NA	NA	NA	NA	NA	NA	NA	NA	NA	NA	NA	NA	NA	NA	NA	NA	NA	NA	NA	NA	NA	NA	NA	NA	NA	NA	NA	NA	NA	NA	NA	NA
GO_ENERGY_DERIVATION_BY_OXIDATION_OF_ORGANIC_COMPOUNDS	NA	NA	NA	NA	NA	NA	NA	NA	NA	NA	NA	NA	0.402121	0.0312548	NA	NA	0.266617	0.00462687	NA	NA	NA	NA	NA	NA	NA	NA	NA	NA	NA	NA	NA	NA	NA	NA	NA	NA	NA	NA	NA	NA	NA	NA	NA	NA	NA	NA	NA	NA	NA
GO_ENERGY_HOMEOSTASIS	0.0350776	NA	NA	NA	NA	NA	NA	NA	NA	NA	NA	NA	NA	NA	0.445928	0.000616256	NA	NA	NA	NA	NA	NA	NA	NA	NA	NA	NA	NA	NA	NA	NA	NA	0.299021	0.0476021	NA	NA	NA	NA	NA	NA	NA	NA	NA	NA	NA	NA	NA	NA	NA
GO_ENERGY_RESERVE_METABOLIC_PROCESS	NA	NA	NA	NA	NA	NA	NA	NA	NA	NA	NA	NA	0.369141	0.0458443	NA	NA	0.150495	0.00452543	0.0242054	0.517746	NA	NA	NA	NA	NA	NA	NA	NA	NA	NA	NA	NA	NA	NA	NA	NA	NA	NA	NA	NA	NA	0.0418109	NA	NA	NA	NA	NA	NA	NA
GO_ENOYL_COA_HYDRATASE_ACTIVITY	NA	NA	NA	NA	NA	NA	NA	NA	0.012865	NA	NA	NA	NA	NA	0.0114696	NA	NA	NA	NA	NA	NA	NA	NA	NA	NA	NA	NA	NA	NA	NA	NA	NA	NA	NA	NA	NA	NA	NA	NA	NA	NA	NA	NA	NA	NA	NA	NA	NA	NA
GO_ENSHEATHMENT_OF_NEURONS	NA	NA	NA	NA	NA	NA	NA	NA	NA	NA	NA	NA	0.00872243	0.370339	NA	NA	0.171933	0.0396513	0.00139579	0.530937	0.00379547	NA	NA	NA	NA	NA	0.799015	0.0433044	0.0261637	NA	NA	NA	0.757025	0.00275095	NA	NA	NA	NA	NA	NA	NA	NA	NA	NA	0.0250568	0.556096	NA	NA	NA
GO_ENTEROENDOCRINE_CELL_DIFFERENTIATION	NA	NA	NA	NA	NA	NA	NA	NA	NA	NA	NA	NA	NA	NA	NA	NA	NA	NA	NA	NA	NA	NA	NA	NA	NA	NA	NA	NA	NA	NA	NA	NA	NA	NA	NA	NA	NA	NA	NA	NA	NA	NA	NA	NA	NA	NA	NA	NA	NA
GO_ENTRAINMENT_OF_CIRCADIAN_CLOCK	NA	NA	NA	NA	NA	NA	0.0170915	0.409654	NA	NA	NA	NA	NA	NA	NA	NA	NA	NA	0.480173	0.0303526	NA	NA	NA	NA	NA	NA	0.00679956	0.276589	NA	NA	NA	NA	NA	NA	NA	NA	0.00372757	NA	NA	NA	NA	NA	0.00749678	NA	NA	NA	NA	NA	NA
GO_ENTRY_INTO_HOST	NA	NA	NA	NA	NA	NA	NA	NA	NA	NA	NA	NA	0.0329297	0.198395	0.011917	0.493219	0.670228	0.0496907	NA	NA	NA	NA	NA	NA	NA	NA	NA	NA	0.0331381	0.167	NA	NA	NA	NA	NA	NA	NA	NA	NA	NA	NA	NA	0.00821599	0.211041	NA	NA	NA	NA	NA
GO_ENZYME_INHIBITOR_ACTIVITY	NA	NA	NA	NA	NA	NA	NA	NA	NA	NA	NA	NA	NA	NA	NA	NA	NA	NA	NA	NA	NA	NA	NA	NA	NA	NA	NA	NA	NA	NA	NA	NA	NA	NA	NA	NA	NA	NA	NA	NA	NA	NA	NA	NA	NA	NA	NA	NA	NA
GO_EPHRIN_RECEPTOR_ACTIVITY	NA	NA	NA	NA	NA	NA	NA	NA	NA	NA	NA	NA	NA	NA	NA	NA	NA	NA	NA	NA	NA	NA	NA	NA	NA	NA	NA	NA	NA	NA	NA	NA	NA	NA	NA	NA	NA	NA	NA	NA	NA	NA	NA	NA	NA	NA	NA	NA	NA
GO_EPHRIN_RECEPTOR_BINDING	NA	NA	NA	NA	0.041372	NA	NA	NA	NA	NA	NA	NA	NA	NA	0.365808	0.036648	0.345668	0.0122005	NA	NA	NA	NA	NA	NA	NA	NA	NA	NA	NA	NA	NA	NA	NA	NA	NA	NA	NA	NA	NA	NA	NA	NA	NA	NA	NA	NA	NA	NA	NA
GO_EPHRIN_RECEPTOR_SIGNALING_PATHWAY	NA	NA	NA	NA	NA	NA	NA	NA	NA	NA	NA	NA	0.891993	0.0117576	NA	NA	0.745593	0.000169738	NA	NA	NA	NA	NA	NA	NA	NA	NA	NA	NA	NA	NA	NA	NA	NA	NA	NA	NA	NA	NA	NA	NA	NA	NA	NA	NA	NA	NA	NA	NA
GO_EPIBOLY	0.0332539	NA	NA	NA	NA	NA	NA	NA	NA	NA	NA	NA	0.0101567	NA	NA	NA	NA	NA	NA	NA	NA	NA	NA	NA	NA	NA	NA	NA	0.42734	0.0418565	NA	NA	NA	NA	NA	NA	0.00372757	0.267533	NA	NA	NA	NA	NA	NA	NA	NA	0.114809	0.0016988	NA
GO_EPIDERMAL_CELL_DIFFERENTIATION	NA	NA	NA	NA	NA	NA	NA	NA	NA	NA	NA	NA	NA	NA	NA	NA	NA	NA	NA	NA	NA	NA	NA	NA	NA	NA	NA	NA	NA	NA	NA	NA	NA	NA	NA	NA	NA	NA	NA	NA	NA	NA	NA	NA	NA	NA	0.752238	0.0245651	NA
GO_EPIDERMAL_GROWTH_FACTOR_RECEPTOR_BINDING	NA	NA	NA	NA	NA	NA	NA	NA	NA	NA	NA	NA	NA	NA	NA	NA	NA	NA	0.136479	0.0303526	NA	NA	NA	NA	NA	NA	NA	NA	NA	NA	NA	NA	NA	NA	NA	NA	0.0390357	NA	0.0113918	NA	NA	NA	NA	NA	NA	NA	NA	NA	NA
GO_EPIDERMAL_GROWTH_FACTOR_RECEPTOR_SIGNALING_PATHWAY	NA	NA	NA	NA	NA	NA	NA	NA	NA	NA	NA	NA	NA	NA	NA	NA	0.573572	0.0236975	NA	NA	NA	NA	NA	NA	NA	NA	NA	NA	NA	NA	NA	NA	NA	NA	NA	NA	NA	NA	NA	NA	NA	NA	NA	NA	NA	NA	NA	NA	NA
GO_EPIDERMIS_MORPHOGENESIS	NA	NA	NA	NA	NA	NA	NA	NA	NA	NA	NA	NA	NA	NA	NA	NA	NA	NA	NA	NA	NA	NA	NA	NA	NA	NA	NA	NA	NA	NA	NA	NA	NA	NA	NA	NA	NA	NA	NA	NA	NA	NA	NA	NA	NA	NA	NA	NA	NA
GO_EPITHELIAL_CELL_APOPTOTIC_PROCESS	NA	NA	NA	NA	NA	NA	0.0116787	0.837585	NA	NA	NA	NA	NA	NA	NA	NA	NA	NA	NA	NA	NA	NA	NA	NA	NA	NA	NA	NA	0.04226	NA	NA	NA	NA	NA	NA	NA	NA	NA	0.0183891	NA	NA	NA	NA	NA	NA	NA	NA	NA	NA
GO_EPITHELIAL_CELL_CELL_ADHESION	NA	NA	NA	NA	NA	NA	NA	NA	NA	NA	NA	NA	NA	NA	NA	NA	NA	NA	NA	NA	NA	NA	NA	NA	NA	NA	NA	NA	0.0271775	0.1427	NA	NA	NA	NA	NA	NA	NA	NA	NA	NA	NA	NA	NA	NA	NA	NA	NA	NA	NA
GO_EPITHELIAL_CELL_DEVELOPMENT	NA	NA	NA	NA	NA	NA	NA	NA	NA	NA	NA	NA	NA	NA	NA	NA	NA	NA	NA	NA	NA	NA	NA	NA	NA	NA	NA	NA	NA	NA	NA	NA	NA	NA	NA	NA	NA	NA	NA	NA	NA	NA	NA	NA	NA	NA	NA	NA	NA
GO_EPITHELIAL_CELL_DIFFERENTIATION_INVOLVED_IN_KIDNEY_DEVELOPMENT	NA	NA	NA	NA	NA	NA	NA	NA	NA	NA	NA	NA	NA	NA	NA	NA	NA	NA	NA	NA	NA	NA	NA	NA	NA	NA	NA	NA	NA	NA	NA	NA	NA	NA	NA	NA	NA	NA	NA	NA	NA	NA	NA	NA	NA	NA	NA	NA	NA
GO_EPITHELIAL_CELL_DIFFERENTIATION_INVOLVED_IN_PROSTATE_GLAND_DEVELOPMENT	NA	NA	NA	NA	NA	NA	NA	NA	NA	NA	NA	NA	NA	NA	NA	NA	NA	NA	NA	NA	NA	NA	NA	NA	NA	NA	NA	NA	NA	NA	NA	NA	NA	NA	NA	NA	NA	NA	NA	NA	NA	NA	NA	NA	NA	NA	NA	0.000692561	NA
GO_EPITHELIAL_CELL_FATE_COMMITMENT	NA	NA	NA	NA	NA	NA	NA	NA	NA	NA	NA	NA	NA	NA	NA	NA	NA	NA	NA	NA	NA	NA	NA	NA	NA	NA	NA	NA	NA	NA	NA	NA	NA	NA	NA	NA	NA	NA	NA	NA	NA	NA	NA	NA	0.0132619	NA	NA	NA	NA
GO_EPITHELIAL_CELL_PROLIFERATION	NA	NA	NA	NA	NA	NA	NA	NA	NA	NA	NA	NA	NA	NA	NA	NA	NA	NA	NA	NA	NA	NA	NA	NA	NA	NA	NA	NA	NA	NA	NA	NA	NA	NA	NA	NA	NA	NA	NA	NA	NA	NA	NA	NA	NA	NA	NA	NA	NA
GO_EPITHELIAL_CELL_PROLIFERATION_INVOLVED_IN_PROSTATE_GLAND_DEVELOPMENT	NA	NA	NA	NA	NA	NA	NA	NA	NA	NA	NA	NA	NA	NA	NA	NA	NA	NA	NA	NA	NA	NA	NA	NA	NA	NA	NA	NA	NA	NA	NA	NA	NA	NA	NA	NA	NA	NA	NA	NA	NA	NA	NA	NA	NA	NA	NA	NA	NA
GO_EPITHELIAL_TO_MESENCHYMAL_TRANSITION	NA	NA	NA	NA	NA	NA	NA	NA	NA	NA	NA	NA	NA	NA	NA	NA	NA	NA	NA	NA	NA	NA	NA	NA	NA	NA	NA	NA	NA	NA	NA	NA	0.454994	0.0183723	NA	NA	NA	NA	NA	NA	NA	NA	NA	NA	NA	NA	0.737162	0.00874562	NA
GO_EPITHELIAL_TUBE_BRANCHING_INVOLVED_IN_LUNG_MORPHOGENESIS	NA	NA	NA	NA	NA	NA	NA	NA	NA	NA	NA	NA	NA	NA	NA	NA	NA	NA	NA	NA	NA	0.0164277	NA	NA	NA	NA	NA	NA	NA	NA	NA	NA	NA	NA	NA	NA	NA	NA	NA	NA	NA	NA	NA	NA	NA	NA	NA	NA	NA
GO_EPITHELIAL_TUBE_FORMATION	0.0262836	NA	0.502369	0.0269222	NA	NA	NA	NA	NA	NA	0.773754	0.0015084	NA	NA	NA	NA	NA	NA	NA	NA	NA	NA	NA	NA	NA	NA	NA	NA	NA	NA	NA	NA	NA	NA	0.389009	0.00630844	NA	NA	NA	NA	NA	NA	NA	NA	NA	NA	NA	NA	NA
GO_EPITHELIAL_TUBE_MORPHOGENESIS	NA	NA	0.0596824	0.00335794	NA	NA	NA	NA	NA	NA	0.305165	0.0121935	NA	NA	NA	NA	NA	NA	NA	NA	0.0206176	0.65953	NA	NA	0.0263661	0.0827163	NA	NA	NA	NA	NA	NA	NA	NA	0.429483	0.00068656	NA	NA	NA	NA	NA	NA	NA	NA	0.0441446	0.281759	NA	NA	NA
GO_EPOXYGENASE_P450_PATHWAY	0.155907	0.00540701	NA	NA	NA	NA	NA	NA	NA	NA	NA	NA	NA	NA	NA	NA	NA	NA	NA	NA	NA	NA	NA	NA	NA	NA	NA	NA	NA	NA	NA	NA	NA	NA	NA	NA	NA	NA	NA	NA	NA	NA	0.00161305	NA	NA	NA	NA	NA	NA
GO_ER_ASSOCIATED_MISFOLDED_PROTEIN_CATABOLIC_PROCESS	NA	NA	NA	NA	NA	NA	NA	NA	NA	NA	NA	NA	NA	NA	NA	NA	NA	NA	0.0210399	NA	NA	NA	NA	NA	NA	NA	NA	NA	NA	NA	NA	NA	NA	NA	NA	NA	NA	NA	NA	NA	NA	NA	NA	NA	NA	NA	NA	NA	NA
GO_ER_NUCLEUS_SIGNALING_PATHWAY	NA	NA	NA	NA	NA	NA	NA	NA	NA	NA	NA	NA	NA	NA	NA	NA	NA	NA	NA	NA	NA	NA	NA	NA	NA	NA	NA	NA	0.0499561	NA	NA	NA	NA	NA	NA	NA	NA	NA	NA	NA	NA	NA	NA	NA	NA	NA	NA	NA	NA
GO_ER_OVERLOAD_RESPONSE	NA	NA	NA	NA	NA	NA	NA	NA	NA	NA	NA	NA	NA	NA	NA	NA	NA	NA	NA	NA	0.0121207	NA	NA	NA	NA	NA	NA	NA	0.0155985	NA	NA	NA	NA	NA	NA	NA	NA	NA	NA	NA	NA	NA	NA	NA	NA	NA	NA	NA	NA
GO_ERAD_PATHWAY	NA	NA	NA	NA	NA	NA	NA	NA	NA	NA	NA	NA	NA	NA	0.494823	0.00519215	NA	NA	0.0408431	0.138329	NA	NA	NA	NA	NA	NA	NA	NA	NA	NA	NA	NA	NA	NA	NA	NA	NA	NA	NA	NA	NA	NA	NA	NA	NA	NA	NA	NA	NA
GO_ERBB_SIGNALING_PATHWAY	NA	NA	NA	NA	NA	NA	NA	NA	NA	NA	NA	NA	NA	NA	NA	NA	0.6629	0.00473249	NA	NA	NA	NA	NA	NA	NA	NA	NA	NA	NA	NA	NA	NA	NA	NA	NA	NA	NA	NA	NA	NA	NA	NA	NA	NA	NA	NA	NA	NA	NA
GO_ERBB2_SIGNALING_PATHWAY	NA	NA	NA	NA	NA	NA	NA	NA	NA	NA	NA	NA	NA	NA	NA	0.0499411	NA	0.0193744	NA	NA	NA	NA	NA	NA	NA	NA	NA	NA	NA	NA	NA	NA	0.277328	0.0404565	NA	NA	NA	NA	NA	NA	NA	NA	NA	NA	NA	NA	NA	NA	NA
GO_ERK1_AND_ERK2_CASCADE	NA	NA	NA	NA	NA	NA	NA	NA	NA	NA	NA	NA	NA	NA	0.0209114	0.158469	0.570588	0.0329215	NA	NA	NA	NA	NA	NA	NA	NA	NA	NA	NA	NA	NA	NA	NA	NA	NA	NA	NA	NA	NA	NA	NA	NA	NA	NA	NA	NA	0.0244817	0.549644	NA
GO_ERROR_FREE_TRANSLESION_SYNTHESIS	NA	NA	NA	NA	NA	NA	NA	NA	NA	NA	NA	NA	NA	NA	NA	NA	NA	NA	NA	NA	NA	NA	NA	0.0110972	NA	NA	NA	NA	NA	NA	NA	NA	NA	NA	NA	NA	NA	NA	NA	NA	NA	NA	NA	NA	NA	NA	NA	NA	NA
GO_ERYTHROCYTE_DEVELOPMENT	NA	NA	NA	NA	NA	NA	NA	NA	NA	NA	NA	NA	NA	NA	NA	NA	NA	NA	NA	NA	NA	NA	NA	NA	NA	NA	NA	NA	NA	NA	NA	NA	NA	NA	0.0484881	NA	NA	NA	NA	NA	NA	NA	NA	NA	NA	NA	NA	NA	NA
GO_ERYTHROCYTE_HOMEOSTASIS	NA	NA	0.486253	0.00596826	NA	NA	NA	NA	NA	NA	NA	NA	NA	NA	NA	NA	NA	NA	NA	NA	0.0373371	0.58537	NA	NA	0.0379206	0.328755	NA	NA	NA	NA	0.781853	0.0095849	NA	NA	NA	NA	NA	NA	NA	NA	NA	NA	NA	NA	NA	NA	NA	NA	0.625274
GO_ERYTHROCYTE_MATURATION	NA	NA	NA	NA	NA	NA	NA	NA	NA	NA	NA	NA	NA	NA	NA	NA	NA	NA	NA	NA	NA	NA	NA	NA	NA	NA	NA	NA	NA	NA	NA	NA	NA	NA	NA	NA	NA	NA	NA	NA	NA	NA	NA	NA	NA	NA	NA	NA	NA
GO_ESC_E_Z_COMPLEX	NA	NA	NA	NA	NA	NA	NA	NA	NA	NA	NA	NA	NA	NA	NA	NA	NA	NA	NA	NA	NA	NA	NA	NA	NA	NA	NA	NA	NA	NA	NA	NA	NA	NA	NA	NA	NA	NA	NA	NA	NA	NA	NA	NA	NA	NA	NA	NA	NA
GO_ESCRT_I_COMPLEX	NA	NA	NA	NA	NA	NA	NA	NA	NA	NA	NA	NA	NA	NA	NA	NA	NA	NA	NA	NA	NA	NA	NA	NA	NA	NA	NA	NA	NA	NA	NA	NA	NA	NA	NA	NA	NA	NA	0.0466103	NA	NA	NA	NA	NA	NA	NA	NA	NA	NA
GO_ESTABLISHMENT_OF_BLOOD_BRAIN_BARRIER	NA	NA	NA	NA	NA	NA	NA	NA	NA	NA	NA	NA	NA	NA	NA	NA	NA	0.0188398	NA	NA	NA	NA	NA	NA	NA	NA	NA	NA	NA	NA	NA	NA	NA	NA	NA	NA	NA	NA	NA	NA	NA	NA	NA	NA	NA	NA	NA	0.0137662	NA
GO_ESTABLISHMENT_OF_CELL_POLARITY	NA	NA	NA	NA	NA	NA	NA	NA	0.458469	0.00488572	0.205661	0.0422865	NA	NA	NA	NA	NA	NA	NA	NA	0.598675	0.0155985	NA	NA	NA	NA	0.0231275	0.739846	NA	NA	0.22847	0.0136912	NA	NA	0.417257	0.0354181	NA	NA	0.145184	0.0406207	NA	NA	NA	NA	NA	NA	NA	NA	NA
GO_ESTABLISHMENT_OF_ENDOTHELIAL_BARRIER	NA	0.0268344	NA	NA	NA	NA	0.037691	NA	NA	NA	NA	NA	0.000989522	0.515864	NA	NA	NA	NA	NA	NA	NA	NA	NA	NA	NA	NA	NA	NA	NA	NA	NA	NA	NA	NA	NA	NA	0.00872453	0.343841	NA	NA	NA	NA	NA	NA	NA	NA	NA	NA	NA
GO_ESTABLISHMENT_OF_ENDOTHELIAL_INTESTINAL_BARRIER	NA	NA	NA	NA	NA	NA	NA	NA	NA	NA	NA	NA	NA	NA	NA	NA	0.0121202	NA	NA	NA	NA	NA	NA	NA	NA	NA	NA	NA	NA	NA	NA	NA	NA	NA	NA	NA	NA	NA	NA	NA	NA	NA	NA	NA	NA	NA	NA	NA	NA
GO_ESTABLISHMENT_OF_EPITHELIAL_CELL_POLARITY	NA	NA	NA	NA	NA	NA	NA	NA	NA	NA	NA	NA	NA	NA	NA	NA	NA	NA	NA	NA	NA	NA	NA	NA	NA	NA	NA	NA	NA	NA	NA	0.0359423	NA	NA	NA	0.0281749	NA	NA	NA	NA	NA	NA	NA	NA	NA	NA	NA	NA	NA
GO_ESTABLISHMENT_OF_LYMPHOCYTE_POLARITY	NA	NA	NA	NA	NA	NA	NA	NA	NA	NA	NA	NA	NA	NA	NA	NA	NA	NA	NA	0.0270962	NA	NA	NA	NA	NA	NA	NA	NA	NA	NA	NA	NA	NA	NA	NA	NA	NA	NA	NA	NA	NA	NA	NA	NA	NA	NA	NA	NA	NA
GO_ESTABLISHMENT_OF_MITOCHONDRION_LOCALIZATION	NA	NA	NA	0.042297	0.0386065	NA	NA	NA	NA	NA	NA	NA	0.0269047	0.0618604	NA	NA	0.0615005	0.0109886	NA	NA	NA	NA	NA	NA	NA	NA	NA	NA	NA	NA	NA	NA	0.0280877	0.229826	NA	NA	NA	NA	NA	NA	NA	NA	0.0377045	NA	NA	NA	NA	NA	NA
GO_ESTABLISHMENT_OF_MITOTIC_SPINDLE_LOCALIZATION	0.0350776	NA	NA	NA	NA	NA	NA	NA	NA	NA	0.0572004	0.0415746	NA	NA	NA	NA	NA	0.0245821	NA	NA	NA	0.00170028	NA	NA	NA	NA	NA	NA	0.436661	0.0441199	0.00784114	0.296449	0.299021	0.0476021	NA	0.0374634	NA	NA	0.153943	0.0152046	NA	NA	NA	NA	NA	NA	NA	NA	NA
GO_ESTABLISHMENT_OF_ORGANELLE_LOCALIZATION	NA	NA	0.305278	0.0483285	0.765066	0.0224949	0.000676198	0.222009	0.36018	0.00494965	0.5232	0.00713761	NA	NA	NA	NA	0.36012	0.00525341	NA	NA	NA	NA	NA	NA	0.0395141	0.556544	0.0112241	0.918213	NA	NA	NA	NA	0.442074	0.0299115	0.0721624	0.00480654	0.0471006	0.100633	0.150808	0.0292825	0.016682	0.211035	NA	NA	0.253123	0.00555448	0.0695043	0.0334633	0.637121
GO_ESTABLISHMENT_OF_PIGMENT_GRANULE_LOCALIZATION	NA	NA	NA	NA	NA	NA	NA	NA	NA	NA	NA	NA	NA	NA	NA	NA	NA	NA	NA	NA	NA	NA	NA	NA	NA	NA	NA	NA	NA	NA	NA	NA	NA	NA	NA	NA	NA	NA	NA	NA	NA	NA	NA	NA	NA	0.040407	NA	NA	NA
GO_ESTABLISHMENT_OF_PLANAR_POLARITY_INVOLVED_IN_NEURAL_TUBE_CLOSURE	NA	NA	NA	NA	NA	NA	NA	NA	NA	0.0199195	NA	NA	NA	NA	NA	NA	NA	NA	NA	NA	NA	NA	NA	NA	NA	NA	NA	NA	NA	NA	NA	NA	NA	NA	NA	NA	NA	NA	NA	NA	NA	NA	NA	NA	NA	NA	NA	NA	NA
GO_ESTABLISHMENT_OF_PLANAR_POLARITY_OF_EMBRYONIC_EPITHELIUM	NA	NA	NA	NA	NA	NA	NA	NA	NA	0.0253089	NA	NA	NA	NA	NA	NA	NA	NA	NA	NA	NA	NA	NA	NA	NA	NA	NA	NA	NA	NA	NA	NA	NA	NA	NA	NA	NA	NA	NA	NA	NA	NA	NA	NA	0.0169128	NA	NA	NA	NA
GO_ESTABLISHMENT_OF_PROTEIN_LOCALIZATION_TO_CHROMOSOME	NA	NA	NA	NA	NA	NA	NA	NA	NA	NA	NA	NA	NA	NA	NA	NA	NA	NA	NA	NA	NA	NA	NA	NA	NA	NA	NA	NA	NA	NA	NA	0.00240426	NA	NA	NA	NA	NA	NA	NA	NA	NA	NA	NA	NA	NA	NA	NA	NA	NA
GO_ESTABLISHMENT_OF_PROTEIN_LOCALIZATION_TO_MEMBRANE	NA	NA	NA	NA	NA	NA	NA	NA	NA	NA	NA	NA	0.484382	0.00732701	NA	NA	0.277936	0.0432969	0.0135483	0.146405	NA	NA	NA	NA	NA	NA	NA	NA	NA	NA	0.0464771	0.0542735	NA	NA	NA	NA	NA	NA	NA	NA	NA	NA	NA	NA	NA	NA	NA	NA	NA
GO_ESTABLISHMENT_OF_PROTEIN_LOCALIZATION_TO_MITOCHONDRIAL_MEMBRANE	NA	NA	NA	NA	NA	NA	NA	NA	NA	NA	NA	NA	NA	NA	NA	NA	NA	NA	NA	NA	0.00514287	NA	NA	NA	NA	NA	NA	NA	0.0452406	0.376203	NA	NA	NA	NA	NA	NA	NA	NA	NA	NA	NA	0.0380986	NA	NA	NA	NA	NA	NA	NA
GO_ESTABLISHMENT_OF_PROTEIN_LOCALIZATION_TO_PLASMA_MEMBRANE	NA	NA	NA	NA	NA	NA	NA	NA	NA	NA	0.142707	0.0181802	0.0174658	0.0674626	NA	NA	NA	NA	NA	NA	NA	NA	NA	NA	NA	NA	NA	NA	0.016351	0.112654	0.0331688	0.120767	NA	NA	NA	NA	NA	NA	NA	NA	NA	NA	NA	NA	0.0342908	0.554105	NA	NA	NA
GO_ESTABLISHMENT_OF_PROTEIN_LOCALIZATION_TO_POSTSYNAPTIC_MEMBRANE	NA	NA	NA	NA	NA	NA	NA	NA	NA	NA	NA	NA	NA	NA	NA	NA	NA	NA	NA	NA	NA	NA	NA	NA	NA	NA	NA	NA	NA	NA	NA	NA	NA	NA	NA	NA	NA	NA	NA	NA	NA	NA	NA	NA	NA	NA	NA	NA	NA
GO_ESTABLISHMENT_OF_PROTEIN_LOCALIZATION_TO_TELOMERE	NA	NA	NA	NA	NA	NA	NA	NA	NA	NA	NA	NA	NA	NA	NA	NA	NA	NA	NA	NA	NA	NA	NA	NA	NA	NA	NA	NA	NA	NA	NA	0.0136668	NA	NA	NA	NA	NA	NA	NA	NA	NA	NA	NA	NA	0.193191	0.0235986	NA	NA	NA
GO_ESTABLISHMENT_OF_PROTEIN_LOCALIZATION_TO_VACUOLE	NA	NA	NA	NA	NA	NA	NA	NA	NA	NA	0.113047	0.00136241	0.0417341	0.559627	NA	NA	0.55842	0.0140584	NA	NA	NA	NA	NA	NA	NA	NA	NA	NA	NA	NA	NA	NA	NA	NA	NA	NA	NA	NA	NA	NA	NA	NA	NA	NA	NA	NA	NA	NA	NA
GO_ESTABLISHMENT_OF_RNA_LOCALIZATION	NA	NA	0.113339	0.000256796	NA	NA	0.409497	7.17266e-05	NA	NA	NA	NA	NA	NA	0.020609	0.899047	0.385911	0.0298818	NA	NA	0.0258811	0.748722	NA	NA	NA	NA	NA	NA	0.047428	0.57839	NA	NA	1.03136e-06	0.328059	0.0542806	0.00203667	NA	NA	NA	NA	0.092153	0.0037921	0.0928209	6.96129e-05	NA	NA	NA	NA	NA
GO_ESTABLISHMENT_OF_SISTER_CHROMATID_COHESION	NA	NA	NA	NA	NA	NA	NA	NA	NA	NA	NA	NA	NA	NA	NA	NA	NA	NA	NA	NA	NA	NA	NA	NA	NA	NA	NA	NA	NA	NA	NA	NA	NA	NA	NA	NA	NA	NA	NA	NA	NA	NA	NA	NA	NA	NA	NA	NA	NA
GO_ESTABLISHMENT_OF_SPINDLE_ORIENTATION	0.0369392	NA	NA	NA	NA	NA	NA	NA	NA	NA	0.0601354	0.043758	NA	NA	NA	NA	NA	NA	NA	NA	NA	0.00184572	NA	NA	NA	NA	0.00797873	0.29025	0.445831	0.0464278	0.00848126	0.0500789	NA	NA	0.306107	0.0394438	NA	NA	0.157978	0.0160431	NA	NA	NA	NA	NA	NA	NA	NA	NA
GO_ESTABLISHMENT_OF_TISSUE_POLARITY	NA	NA	NA	NA	NA	NA	NA	NA	NA	NA	NA	NA	NA	NA	NA	NA	0.577982	0.00180588	0.0314576	0.238722	NA	NA	NA	NA	NA	NA	NA	NA	NA	NA	NA	NA	NA	NA	NA	NA	NA	NA	NA	NA	NA	NA	NA	NA	NA	NA	NA	NA	NA
GO_ESTABLISHMENT_OR_MAINTENANCE_OF_BIPOLAR_CELL_POLARITY	NA	0.0290381	0.0226599	NA	NA	NA	NA	NA	NA	NA	NA	0.00100775	NA	NA	NA	NA	0.529727	0.0106824	0.0130252	0.622706	NA	NA	NA	NA	NA	NA	NA	NA	NA	NA	NA	NA	NA	NA	NA	NA	NA	NA	NA	NA	NA	NA	NA	NA	NA	NA	NA	NA	NA
GO_ESTABLISHMENT_OR_MAINTENANCE_OF_CELL_POLARITY	NA	NA	NA	NA	0.493712	0.0142939	NA	NA	0.197687	0.0163709	0.440991	0.00449155	0.0527197	0.0227011	NA	NA	0.259297	0.00660485	0.0255049	0.155318	NA	NA	0.0316385	0.478561	NA	NA	NA	NA	NA	NA	0.257001	0.0233653	NA	NA	0.653428	0.0443071	NA	NA	NA	NA	NA	NA	NA	NA	NA	NA	NA	NA	NA
GO_ESTRADIOL_17_BETA_DEHYDROGENASE_ACTIVITY	NA	NA	NA	NA	NA	NA	NA	NA	NA	NA	NA	NA	NA	NA	NA	NA	NA	NA	NA	NA	NA	NA	NA	0.00332545	NA	NA	NA	NA	NA	NA	NA	NA	NA	NA	NA	NA	NA	NA	NA	NA	NA	NA	NA	NA	NA	NA	NA	NA	NA
GO_ESTROGEN_BIOSYNTHETIC_PROCESS	NA	NA	NA	NA	NA	NA	NA	NA	NA	NA	NA	NA	NA	NA	NA	NA	NA	NA	NA	NA	NA	NA	NA	0.00391134	NA	NA	NA	NA	NA	NA	NA	NA	NA	NA	NA	NA	NA	NA	NA	NA	NA	NA	NA	NA	NA	NA	NA	NA	NA
GO_ESTROGEN_METABOLIC_PROCESS	NA	NA	NA	NA	NA	NA	NA	NA	NA	NA	NA	NA	NA	NA	NA	NA	NA	NA	NA	NA	NA	NA	NA	0.0227247	NA	NA	NA	NA	NA	NA	NA	NA	NA	NA	NA	NA	NA	NA	NA	NA	NA	NA	NA	NA	NA	NA	NA	NA	NA
GO_ESTROGEN_RECEPTOR_BINDING	NA	NA	NA	NA	NA	NA	NA	NA	NA	NA	NA	NA	0.00392774	0.484307	NA	NA	0.483166	0.0393637	NA	NA	NA	NA	NA	NA	NA	NA	0.012203	0.32971	NA	NA	NA	NA	NA	NA	0.0670521	0.00587366	NA	NA	0.0170594	0.202984	NA	NA	NA	NA	NA	NA	NA	NA	NA
GO_ESTROUS_CYCLE	NA	NA	0.0149597	0.173593	NA	NA	NA	NA	NA	NA	NA	NA	NA	NA	NA	NA	NA	NA	NA	NA	NA	NA	NA	NA	NA	NA	NA	NA	NA	NA	NA	NA	NA	NA	NA	NA	NA	NA	NA	NA	NA	NA	NA	NA	NA	NA	NA	NA	NA
GO_ETHER_BIOSYNTHETIC_PROCESS	NA	NA	NA	NA	NA	NA	NA	NA	NA	NA	NA	NA	NA	NA	NA	NA	NA	NA	NA	NA	NA	NA	NA	NA	NA	NA	NA	NA	NA	NA	NA	NA	NA	NA	NA	NA	NA	NA	NA	NA	NA	NA	NA	NA	0.00853292	NA	NA	NA	NA
GO_ETHER_METABOLIC_PROCESS	NA	NA	NA	NA	NA	NA	NA	NA	NA	NA	NA	NA	NA	NA	NA	NA	NA	NA	NA	NA	NA	NA	NA	NA	NA	NA	NA	NA	NA	NA	NA	NA	NA	NA	NA	NA	NA	NA	NA	NA	NA	NA	NA	NA	0.00349147	NA	NA	NA	NA
GO_EUCHROMATIN	NA	NA	NA	NA	NA	NA	0.494466	0.0265414	NA	NA	NA	NA	0.0209551	0.139714	NA	NA	NA	NA	NA	NA	NA	NA	NA	NA	NA	NA	NA	NA	NA	NA	NA	NA	NA	NA	NA	NA	NA	NA	NA	NA	NA	NA	NA	NA	0.013422	0.431699	NA	NA	NA
GO_EUKARYOTIC_48S_PREINITIATION_COMPLEX	NA	NA	NA	NA	NA	NA	NA	6.52882e-05	NA	NA	NA	NA	NA	NA	NA	NA	NA	NA	NA	NA	NA	NA	NA	NA	NA	NA	NA	NA	NA	NA	NA	NA	NA	NA	NA	NA	NA	NA	NA	NA	NA	NA	NA	NA	NA	NA	NA	NA	NA
GO_EUKARYOTIC_INITIATION_FACTOR_4E_BINDING	NA	NA	NA	NA	NA	NA	NA	NA	NA	NA	NA	NA	NA	NA	NA	NA	NA	NA	NA	NA	NA	NA	NA	NA	NA	NA	NA	NA	NA	NA	NA	NA	NA	NA	NA	NA	NA	NA	0.0466103	NA	NA	NA	NA	NA	NA	NA	NA	NA	NA
GO_EUKARYOTIC_TRANSLATION_INITIATION_FACTOR_3_COMPLEX	NA	NA	NA	NA	NA	NA	NA	0.000111105	NA	NA	NA	NA	NA	NA	NA	NA	NA	NA	NA	NA	NA	NA	NA	NA	NA	NA	NA	NA	NA	NA	NA	NA	NA	NA	NA	NA	NA	NA	NA	NA	NA	NA	0.0169128	0.168101	NA	NA	NA	NA	NA
GO_EUKARYOTIC_TRANSLATION_INITIATION_FACTOR_4F_COMPLEX	NA	NA	NA	NA	NA	NA	NA	NA	NA	NA	NA	NA	NA	NA	NA	0.00902368	0.0168401	NA	NA	NA	NA	NA	NA	NA	NA	NA	NA	NA	NA	NA	NA	NA	NA	NA	NA	NA	NA	NA	NA	NA	NA	NA	NA	NA	NA	NA	NA	NA	NA
GO_EXCITATORY_SYNAPSE	NA	NA	NA	NA	NA	NA	NA	NA	NA	NA	NA	NA	NA	0.0476458	NA	NA	NA	NA	NA	NA	NA	NA	NA	NA	NA	NA	NA	NA	NA	NA	NA	NA	NA	NA	NA	NA	NA	NA	NA	NA	NA	NA	NA	NA	NA	NA	NA	NA	NA
GO_EXCRETION	NA	NA	NA	NA	NA	NA	NA	NA	NA	NA	NA	NA	NA	NA	NA	NA	NA	NA	NA	NA	NA	NA	NA	NA	NA	NA	NA	NA	NA	NA	NA	NA	NA	NA	NA	NA	NA	NA	NA	NA	NA	NA	NA	NA	NA	NA	NA	NA	NA
GO_EXECUTION_PHASE_OF_APOPTOSIS	NA	NA	0.701828	0.0323544	NA	NA	NA	NA	NA	NA	NA	NA	NA	NA	NA	NA	NA	NA	NA	NA	NA	NA	0.0403678	0.502116	0.545682	0.00177107	NA	NA	NA	NA	NA	NA	NA	NA	NA	NA	NA	NA	NA	NA	NA	NA	NA	NA	NA	NA	NA	NA	NA
GO_EXIT_FROM_MITOSIS	NA	NA	NA	NA	NA	NA	NA	NA	NA	NA	NA	NA	0.0326763	NA	NA	NA	NA	0.00148785	NA	NA	NA	NA	NA	NA	0.418226	0.0266964	NA	NA	0.0103057	0.236259	NA	NA	NA	NA	0.247362	0.0247623	NA	NA	NA	NA	NA	NA	NA	0.0033017	NA	NA	NA	NA	NA
GO_EXOCRINE_SYSTEM_DEVELOPMENT	NA	NA	NA	NA	NA	NA	NA	NA	NA	NA	NA	NA	NA	NA	NA	NA	NA	NA	NA	NA	NA	NA	NA	NA	NA	NA	NA	NA	NA	NA	NA	NA	NA	NA	NA	NA	NA	NA	NA	NA	NA	0.0421337	NA	NA	NA	NA	NA	NA	NA
GO_EXOCYST	NA	NA	NA	NA	NA	NA	NA	NA	NA	NA	NA	NA	NA	NA	NA	NA	NA	0.044961	NA	NA	NA	NA	NA	NA	NA	NA	NA	NA	NA	NA	NA	NA	NA	NA	NA	NA	NA	NA	NA	NA	NA	NA	NA	NA	NA	NA	NA	NA	NA
GO_EXOCYTIC_PROCESS	NA	NA	NA	NA	NA	NA	NA	NA	NA	NA	NA	NA	NA	NA	NA	NA	NA	NA	NA	NA	NA	NA	NA	NA	NA	NA	NA	NA	NA	NA	NA	NA	NA	NA	0.0103582	NA	NA	NA	NA	NA	NA	NA	NA	NA	NA	NA	NA	NA	NA
GO_EXOCYTIC_VESICLE	NA	NA	NA	NA	NA	NA	NA	NA	NA	NA	NA	NA	NA	NA	NA	NA	NA	NA	NA	NA	NA	NA	NA	NA	NA	NA	NA	NA	NA	NA	NA	NA	NA	NA	NA	NA	NA	NA	NA	NA	NA	NA	NA	NA	NA	NA	NA	NA	NA
GO_EXODEOXYRIBONUCLEASE_ACTIVITY	NA	NA	0.243987	0.0310655	0.0283098	0.272251	0.300315	0.0444282	NA	NA	NA	NA	NA	NA	NA	NA	NA	NA	NA	NA	NA	NA	NA	NA	NA	NA	NA	NA	0.302741	0.0185682	0.000112912	0.198236	NA	0.0201031	NA	NA	NA	NA	NA	NA	0.288886	0.0433553	0.0276373	0.211959	NA	NA	NA	0.0436226	0.0118604
GO_EXOGENOUS_PROTEIN_BINDING	NA	NA	NA	NA	NA	NA	NA	NA	NA	NA	NA	NA	NA	NA	NA	NA	NA	NA	NA	NA	NA	NA	NA	NA	NA	NA	NA	NA	NA	NA	0.581955	0.0379224	NA	NA	NA	NA	0.496446	0.0300539	NA	NA	NA	NA	0.0115767	NA	NA	NA	NA	NA	NA
GO_EXON_EXON_JUNCTION_COMPLEX	NA	NA	NA	NA	NA	NA	NA	NA	NA	0.0343556	NA	NA	NA	NA	NA	NA	NA	NA	NA	NA	NA	NA	NA	NA	NA	NA	NA	NA	NA	NA	NA	NA	NA	NA	NA	NA	NA	NA	NA	NA	NA	NA	NA	0.0192852	NA	NA	NA	NA	NA
GO_EXONUCLEASE_ACTIVITY	NA	NA	NA	NA	NA	NA	0.38698	0.0390554	NA	NA	NA	NA	NA	NA	NA	NA	NA	NA	NA	NA	NA	NA	NA	NA	0.00517996	NA	0.0151455	0.185633	NA	NA	0.00289979	0.0504098	NA	NA	NA	NA	NA	NA	NA	NA	NA	NA	NA	NA	NA	NA	NA	NA	0.0250191
GO_EXONUCLEASE_ACTIVITY_ACTIVE_WITH_EITHER_RIBO_OR_DEOXYRIBONUCLEIC_ACIDS_AND_PRODUCING_5_PHOSPHOMONOESTERS	NA	NA	NA	NA	NA	NA	NA	NA	NA	NA	NA	NA	NA	NA	NA	NA	NA	NA	NA	NA	NA	NA	NA	NA	0.0249471	NA	NA	NA	NA	NA	0.000579177	0.441793	NA	NA	NA	NA	NA	NA	NA	NA	NA	NA	NA	NA	NA	NA	NA	NA	NA
GO_EXOPEPTIDASE_ACTIVITY	NA	0.015809	NA	NA	NA	NA	NA	NA	NA	NA	NA	NA	NA	NA	NA	NA	NA	NA	NA	NA	NA	0.0268196	NA	NA	0.109413	0.0111356	NA	NA	NA	NA	NA	NA	NA	NA	NA	NA	NA	NA	NA	NA	NA	NA	NA	NA	0.00546392	0.721958	NA	NA	NA
GO_EXORIBONUCLEASE_ACTIVITY	NA	NA	NA	NA	NA	NA	NA	NA	NA	NA	NA	NA	NA	NA	NA	NA	NA	NA	NA	NA	NA	NA	NA	NA	NA	NA	NA	NA	NA	NA	NA	NA	NA	NA	NA	NA	NA	NA	NA	NA	NA	NA	NA	NA	NA	NA	NA	NA	NA
GO_EXORIBONUCLEASE_COMPLEX	0.020126	NA	NA	NA	0.0386065	NA	NA	NA	NA	NA	NA	NA	NA	NA	NA	NA	NA	NA	NA	NA	NA	NA	NA	NA	NA	NA	NA	NA	NA	NA	NA	NA	NA	NA	NA	NA	NA	NA	NA	NA	NA	NA	0.266656	0.0316301	0.00349147	NA	NA	NA	NA
GO_EXPLORATION_BEHAVIOR	NA	0.00905131	NA	NA	NA	NA	NA	NA	NA	NA	NA	NA	NA	NA	NA	NA	NA	NA	NA	NA	NA	NA	NA	NA	NA	NA	NA	NA	NA	NA	NA	NA	NA	NA	NA	NA	NA	NA	NA	NA	NA	NA	NA	NA	NA	NA	NA	NA	NA
GO_EXPORT_ACROSS_PLASMA_MEMBRANE	NA	NA	NA	NA	NA	NA	NA	NA	NA	NA	NA	NA	NA	NA	NA	NA	NA	NA	NA	NA	NA	NA	NA	NA	NA	NA	NA	NA	NA	NA	NA	NA	NA	NA	NA	NA	NA	NA	NA	NA	NA	NA	NA	NA	NA	NA	NA	NA	NA
GO_EXTRACELLULAR_MATRIX_ASSEMBLY	NA	NA	NA	NA	NA	NA	NA	NA	NA	NA	NA	NA	NA	NA	0.0370213	NA	0.0309827	0.18685	NA	NA	NA	NA	NA	NA	NA	NA	NA	NA	NA	NA	NA	NA	NA	NA	NA	NA	NA	NA	0.189581	0.0234304	NA	0.028928	NA	NA	NA	NA	0.0393573	0.490993	NA
GO_EXTRACELLULAR_MATRIX_BINDING	NA	0.0397933	NA	NA	NA	NA	NA	NA	NA	NA	NA	NA	NA	NA	NA	NA	0.0119334	0.272954	0.0231631	NA	NA	NA	NA	NA	NA	NA	0.481369	0.0168146	NA	NA	NA	NA	NA	NA	NA	NA	NA	NA	NA	NA	0.0573024	0.0108952	NA	NA	NA	NA	NA	NA	NA
GO_EXTRACELLULAR_MATRIX_DISASSEMBLY	NA	NA	NA	NA	NA	NA	NA	NA	NA	NA	0.23019	0.00710373	NA	NA	NA	NA	NA	NA	NA	NA	NA	NA	NA	NA	NA	NA	NA	NA	0.739762	0.044104	NA	NA	NA	NA	NA	NA	NA	NA	0.00705009	0.358161	NA	NA	NA	NA	NA	NA	NA	NA	NA
GO_EXTRACELLULAR_MATRIX_STRUCTURAL_CONSTITUENT	NA	NA	NA	NA	NA	NA	0.0197994	0.735834	NA	NA	0.00281359	NA	NA	NA	NA	NA	0.0168779	0.360592	NA	NA	NA	NA	0.390657	0.0354181	NA	NA	0.304904	0.00551338	0.0207408	0.804616	NA	NA	NA	NA	NA	NA	NA	NA	NA	NA	NA	NA	NA	NA	NA	NA	NA	NA	NA
GO_EXTRACELLULAR_MATRIX_STRUCTURAL_CONSTITUENT_CONFERRING_COMPRESSION_RESISTANCE	NA	NA	0.243987	0.0310655	NA	NA	NA	NA	NA	NA	NA	NA	NA	NA	NA	NA	NA	NA	NA	NA	NA	NA	NA	NA	NA	NA	NA	NA	NA	NA	NA	NA	NA	NA	NA	NA	NA	NA	NA	NA	NA	NA	NA	NA	NA	NA	NA	NA	NA
GO_EXTRACELLULAR_MATRIX_STRUCTURAL_CONSTITUENT_CONFERRING_TENSILE_STRENGTH	NA	NA	NA	NA	NA	NA	NA	NA	NA	NA	0.0104759	NA	NA	NA	NA	NA	NA	NA	NA	NA	NA	NA	0.279909	0.0360089	NA	NA	NA	NA	0.00431402	NA	NA	NA	NA	NA	NA	NA	NA	NA	NA	NA	NA	NA	NA	NA	NA	NA	NA	NA	NA
GO_EXTRACELLULAR_STRUCTURE_ORGANIZATION	0.429582	0.0228468	NA	NA	NA	NA	NA	NA	NA	NA	0.00160137	0.162511	NA	NA	0.0350684	0.939012	0.00953443	0.569784	NA	NA	NA	NA	NA	NA	NA	NA	0.834101	0.0045887	0.0291536	0.527108	0.0943729	0.0183228	NA	NA	NA	NA	NA	NA	NA	NA	NA	NA	NA	NA	NA	NA	0.0195474	0.0818927	NA
GO_EXTRINSIC_APOPTOTIC_SIGNALING_PATHWAY	NA	NA	0.166653	0.00903137	NA	NA	NA	NA	NA	NA	NA	NA	NA	NA	NA	NA	NA	NA	NA	NA	NA	NA	NA	NA	0.00495059	0.158533	0.124566	0.022494	0.00140878	0.179286	NA	NA	NA	NA	NA	NA	NA	NA	NA	NA	NA	NA	NA	NA	NA	NA	NA	NA	NA
GO_EXTRINSIC_APOPTOTIC_SIGNALING_PATHWAY_VIA_DEATH_DOMAIN_RECEPTORS	NA	NA	NA	NA	0.0223591	NA	NA	NA	NA	NA	NA	NA	NA	NA	NA	NA	NA	NA	NA	NA	NA	NA	NA	NA	NA	NA	NA	NA	NA	NA	NA	NA	NA	NA	NA	NA	NA	NA	NA	NA	NA	NA	NA	NA	NA	NA	NA	NA	NA
GO_EXTRINSIC_COMPONENT_OF_MEMBRANE	NA	NA	NA	NA	NA	NA	NA	NA	NA	NA	0.661688	0.0241698	NA	NA	NA	NA	NA	NA	NA	NA	NA	NA	NA	NA	NA	NA	NA	NA	NA	NA	NA	NA	NA	NA	NA	NA	NA	NA	NA	NA	NA	NA	NA	NA	NA	NA	NA	NA	NA
GO_EXTRINSIC_COMPONENT_OF_MITOCHONDRIAL_INNER_MEMBRANE	NA	NA	NA	NA	NA	NA	NA	NA	NA	NA	NA	NA	NA	NA	NA	NA	NA	NA	NA	NA	NA	NA	NA	NA	NA	NA	NA	NA	NA	NA	NA	NA	NA	NA	NA	NA	NA	NA	NA	NA	NA	NA	0.0115834	NA	NA	NA	NA	NA	NA
GO_EXTRINSIC_COMPONENT_OF_ORGANELLE_MEMBRANE	0.340036	0.0301663	0.463881	0.0239182	NA	NA	NA	0.0394105	NA	NA	NA	NA	NA	NA	NA	NA	NA	NA	NA	NA	NA	NA	NA	NA	NA	NA	NA	NA	NA	NA	NA	NA	NA	NA	NA	NA	NA	NA	NA	NA	NA	NA	NA	NA	NA	NA	NA	NA	NA
GO_EXTRINSIC_COMPONENT_OF_PLASMA_MEMBRANE	NA	NA	NA	NA	NA	NA	NA	NA	NA	NA	NA	NA	NA	NA	NA	NA	NA	NA	NA	NA	NA	NA	NA	NA	NA	NA	NA	NA	NA	NA	NA	NA	NA	NA	NA	NA	NA	NA	NA	NA	NA	NA	NA	NA	NA	NA	NA	NA	NA
GO_EXTRINSIC_COMPONENT_OF_SYNAPTIC_MEMBRANE	NA	NA	NA	NA	NA	NA	NA	NA	NA	0.0150854	NA	0.00622294	0.0411421	NA	NA	NA	NA	NA	NA	NA	NA	NA	NA	NA	NA	NA	NA	NA	NA	NA	NA	NA	NA	NA	NA	NA	NA	NA	NA	NA	NA	NA	NA	NA	NA	NA	NA	NA	NA
GO_EYE_MORPHOGENESIS	NA	NA	0.0481162	0.58849	NA	NA	NA	NA	NA	NA	0.249339	0.0151647	NA	NA	NA	NA	NA	NA	NA	NA	NA	NA	NA	NA	0.0308164	0.170304	NA	NA	NA	NA	NA	NA	NA	NA	NA	NA	NA	NA	NA	NA	NA	NA	NA	NA	NA	NA	NA	NA	NA
GO_EYE_PHOTORECEPTOR_CELL_DEVELOPMENT	NA	NA	NA	NA	NA	NA	NA	NA	NA	NA	NA	NA	NA	NA	NA	NA	NA	NA	NA	NA	NA	NA	NA	NA	NA	NA	NA	NA	NA	NA	NA	NA	NA	NA	NA	NA	NA	NA	NA	NA	NA	NA	NA	NA	NA	NA	NA	NA	NA
GO_EYE_PHOTORECEPTOR_CELL_DIFFERENTIATION	NA	NA	NA	NA	NA	NA	NA	NA	NA	NA	NA	NA	NA	NA	NA	NA	NA	NA	NA	NA	NA	NA	NA	NA	NA	NA	NA	NA	NA	NA	NA	NA	NA	NA	NA	NA	NA	NA	NA	0.0254578	NA	NA	NA	NA	NA	NA	NA	NA	NA
GO_FACE_DEVELOPMENT	NA	NA	NA	NA	NA	NA	NA	NA	NA	NA	NA	NA	NA	NA	NA	NA	NA	NA	NA	NA	NA	NA	NA	NA	NA	NA	NA	NA	NA	NA	NA	NA	NA	NA	NA	NA	NA	NA	NA	0.027554	NA	NA	NA	NA	NA	NA	NA	NA	NA
GO_FAD_BINDING	NA	NA	NA	NA	NA	NA	NA	NA	0.0204071	NA	NA	NA	NA	NA	NA	NA	NA	NA	NA	NA	NA	NA	NA	NA	NA	NA	NA	NA	NA	NA	NA	NA	NA	NA	NA	NA	NA	NA	NA	0.000734584	NA	NA	NA	0.0489419	NA	NA	NA	NA	0.0256851
GO_FAT_CELL_DIFFERENTIATION	NA	NA	NA	NA	NA	NA	0.894452	0.0292978	NA	NA	NA	NA	NA	NA	NA	NA	NA	NA	NA	NA	NA	NA	0.0402111	0.51343	NA	NA	NA	NA	0.897524	0.0258454	NA	NA	NA	NA	NA	NA	NA	NA	NA	NA	NA	NA	NA	NA	NA	NA	NA	NA	NA
GO_FAT_SOLUBLE_VITAMIN_METABOLIC_PROCESS	0.317236	0.0257593	NA	NA	NA	NA	NA	NA	NA	NA	NA	NA	NA	NA	NA	NA	NA	NA	NA	NA	NA	NA	NA	NA	NA	NA	NA	NA	NA	NA	NA	NA	NA	NA	NA	NA	NA	NA	NA	NA	NA	NA	NA	NA	NA	NA	NA	NA	NA
GO_FATTY_ACID_BETA_OXIDATION	NA	NA	NA	NA	NA	NA	NA	NA	NA	NA	NA	NA	0.0388472	0.109449	NA	NA	NA	NA	NA	NA	NA	NA	NA	NA	NA	NA	0.573762	0.0331775	NA	NA	0.581955	0.0379224	NA	NA	0.000911008	NA	NA	0.0300539	NA	NA	NA	NA	NA	NA	NA	NA	NA	NA	NA
GO_FATTY_ACID_BETA_OXIDATION_USING_ACYL_COA_DEHYDROGENASE	NA	NA	NA	NA	NA	NA	NA	NA	NA	NA	NA	NA	NA	NA	0.0138648	NA	NA	NA	NA	NA	NA	NA	NA	NA	NA	NA	NA	NA	NA	NA	NA	NA	NA	NA	NA	NA	NA	NA	NA	NA	NA	NA	NA	NA	NA	NA	NA	NA	NA
GO_FATTY_ACID_BETA_OXIDATION_USING_ACYL_COA_OXIDASE	NA	NA	NA	NA	NA	NA	NA	NA	NA	NA	NA	NA	NA	NA	NA	NA	NA	NA	NA	NA	NA	NA	NA	NA	NA	NA	NA	NA	NA	NA	NA	NA	NA	NA	NA	NA	NA	NA	NA	NA	NA	NA	NA	NA	NA	NA	NA	NA	NA
GO_FATTY_ACID_BIOSYNTHETIC_PROCESS	NA	NA	NA	NA	NA	NA	NA	NA	NA	NA	NA	NA	NA	NA	NA	NA	NA	NA	0.0480969	0.865148	NA	NA	NA	NA	NA	NA	NA	NA	NA	NA	NA	NA	NA	NA	NA	NA	NA	NA	NA	NA	0.00146057	0.740759	NA	NA	NA	NA	NA	NA	NA
GO_FATTY_ACID_CATABOLIC_PROCESS	0.0720414	0.025481	NA	NA	NA	NA	NA	NA	NA	NA	NA	NA	0.0253652	0.263782	NA	NA	NA	NA	NA	NA	0.221392	0.0425133	NA	NA	NA	NA	NA	NA	NA	NA	NA	NA	NA	NA	0.00105722	NA	NA	NA	NA	NA	NA	NA	0.392181	0.0348258	NA	NA	NA	NA	NA
GO_FATTY_ACID_DERIVATIVE_BINDING	NA	NA	NA	NA	NA	NA	NA	NA	NA	NA	NA	NA	NA	NA	0.0122563	NA	NA	NA	0.0173485	0.114581	NA	NA	NA	NA	NA	NA	NA	NA	NA	NA	NA	NA	NA	NA	NA	NA	NA	NA	NA	NA	NA	NA	NA	0.0386949	NA	NA	NA	NA	NA
GO_FATTY_ACID_DERIVATIVE_BIOSYNTHETIC_PROCESS	NA	NA	NA	NA	NA	NA	NA	NA	NA	NA	NA	NA	0.0460148	0.803416	NA	NA	NA	NA	NA	NA	NA	NA	NA	NA	NA	NA	NA	NA	NA	NA	NA	NA	NA	NA	NA	NA	NA	NA	NA	NA	NA	NA	NA	NA	0.0342107	NA	NA	NA	NA
GO_FATTY_ACID_DERIVATIVE_CATABOLIC_PROCESS	NA	NA	NA	NA	NA	NA	NA	NA	NA	NA	NA	NA	NA	NA	NA	NA	NA	NA	NA	NA	NA	NA	NA	NA	NA	NA	NA	NA	NA	NA	NA	NA	NA	NA	NA	NA	NA	NA	NA	NA	0.018964	NA	NA	NA	NA	NA	NA	NA	NA
GO_FATTY_ACID_DERIVATIVE_METABOLIC_PROCESS	NA	NA	NA	NA	NA	NA	NA	NA	NA	NA	NA	NA	NA	NA	NA	NA	NA	NA	NA	NA	NA	NA	NA	NA	NA	NA	NA	NA	NA	NA	NA	NA	NA	NA	NA	NA	NA	NA	NA	NA	NA	NA	0.0181583	0.564077	0.0181583	NA	NA	NA	NA
GO_FATTY_ACID_DERIVATIVE_TRANSPORT	NA	NA	NA	NA	NA	NA	NA	NA	NA	NA	NA	NA	NA	NA	NA	NA	NA	NA	NA	NA	NA	NA	NA	NA	NA	NA	NA	NA	NA	NA	NA	NA	NA	NA	NA	NA	NA	NA	NA	NA	NA	NA	0.00288666	NA	NA	NA	NA	NA	NA
GO_FATTY_ACID_HOMEOSTASIS	NA	NA	NA	NA	NA	NA	NA	NA	NA	NA	NA	NA	NA	NA	NA	0.0152771	NA	NA	0.0407355	NA	NA	NA	NA	NA	NA	NA	NA	NA	NA	NA	NA	NA	NA	NA	NA	NA	NA	NA	NA	NA	NA	NA	NA	NA	NA	NA	NA	0.026987	NA
GO_FATTY_ACID_LIGASE_ACTIVITY	NA	NA	NA	NA	NA	NA	NA	NA	NA	NA	NA	NA	NA	NA	NA	NA	NA	NA	NA	NA	NA	NA	NA	NA	NA	NA	NA	NA	NA	NA	NA	NA	NA	NA	NA	NA	NA	NA	NA	NA	0.0444282	NA	0.0276373	NA	NA	NA	NA	NA	NA
GO_FATTY_ACID_METABOLIC_PROCESS	NA	NA	NA	NA	NA	NA	NA	NA	0.0252421	0.836814	NA	NA	NA	NA	NA	NA	NA	NA	0.00928949	0.400395	NA	NA	0.0396139	0.327612	NA	NA	0.016096	0.174334	NA	NA	NA	NA	NA	NA	0.00710257	0.86407	NA	NA	NA	NA	0.00127552	0.0804908	NA	NA	0.0028087	0.435062	NA	NA	NA
GO_FATTY_ACID_TRANSMEMBRANE_TRANSPORT	NA	NA	NA	NA	NA	NA	NA	0.0481768	NA	NA	NA	NA	NA	NA	0.321517	0.0271976	NA	NA	NA	NA	NA	NA	NA	NA	NA	NA	NA	NA	NA	NA	NA	NA	NA	NA	0.0222998	0.183018	NA	NA	NA	NA	NA	NA	NA	NA	NA	NA	NA	NA	NA
GO_FATTY_ACID_TRANSPORT	NA	NA	NA	NA	NA	NA	NA	NA	NA	NA	NA	NA	0.0424927	0.470021	NA	NA	0.796008	0.0355299	NA	NA	NA	NA	NA	NA	NA	NA	NA	NA	NA	NA	NA	NA	NA	NA	NA	NA	NA	NA	NA	NA	NA	NA	0.0321664	0.66574	0.0321664	0.743606	NA	NA	NA
GO_FATTY_ACYL_COA_BIOSYNTHETIC_PROCESS	NA	NA	NA	NA	NA	NA	NA	NA	NA	NA	NA	NA	NA	NA	NA	NA	0.395135	0.0193744	NA	NA	NA	NA	NA	NA	0.022908	NA	NA	NA	NA	NA	NA	NA	NA	NA	0.0412176	NA	NA	NA	NA	NA	NA	NA	NA	NA	0.00632251	NA	NA	NA	NA
GO_FATTY_ACYL_COA_METABOLIC_PROCESS	NA	NA	NA	NA	NA	NA	0.0280536	NA	NA	NA	NA	NA	0.0193334	0.476102	NA	NA	0.47497	0.0370293	NA	NA	NA	0.0314789	NA	NA	0.0434508	NA	NA	NA	NA	NA	NA	NA	NA	NA	NA	NA	NA	NA	NA	NA	NA	NA	NA	NA	0.0125712	NA	NA	NA	NA
GO_FC_RECEPTOR_MEDIATED_STIMULATORY_SIGNALING_PATHWAY	NA	NA	NA	NA	NA	NA	NA	NA	NA	NA	NA	NA	NA	NA	NA	NA	NA	NA	NA	NA	NA	NA	NA	NA	NA	NA	NA	NA	NA	NA	NA	NA	0.769125	0.0148774	NA	NA	NA	NA	NA	NA	NA	NA	NA	NA	NA	NA	NA	NA	NA
GO_FC_RECEPTOR_SIGNALING_PATHWAY	NA	NA	NA	NA	NA	NA	NA	NA	NA	NA	NA	NA	NA	NA	NA	NA	NA	NA	NA	NA	NA	NA	NA	NA	NA	NA	NA	NA	NA	NA	NA	NA	NA	NA	NA	NA	NA	NA	NA	0.0407564	NA	NA	NA	NA	NA	NA	NA	NA	NA
GO_FEMALE_MEIOTIC_NUCLEAR_DIVISION	NA	NA	NA	NA	NA	NA	NA	NA	NA	NA	NA	0.0332784	NA	NA	NA	NA	NA	NA	NA	NA	NA	NA	NA	NA	NA	NA	NA	NA	NA	NA	NA	NA	NA	NA	NA	NA	NA	NA	NA	NA	NA	NA	NA	NA	NA	NA	NA	NA	NA
GO_FEMALE_SEX_DIFFERENTIATION	NA	NA	NA	NA	NA	NA	NA	NA	NA	NA	NA	NA	NA	NA	NA	NA	NA	NA	NA	NA	NA	NA	NA	NA	NA	NA	NA	NA	NA	NA	0.406493	0.031531	NA	NA	NA	NA	NA	NA	NA	NA	NA	NA	NA	NA	NA	NA	NA	NA	NA
GO_FERTILIZATION	NA	NA	0.710985	0.0384848	NA	NA	NA	NA	NA	NA	NA	NA	NA	NA	0.0470172	0.378084	NA	NA	NA	NA	NA	NA	NA	NA	NA	NA	NA	NA	NA	NA	NA	NA	NA	NA	NA	NA	NA	NA	NA	NA	NA	NA	NA	NA	NA	NA	NA	NA	NA
GO_FIBRILLAR_CENTER	NA	NA	0.486253	0.0239931	0.0198025	0.114686	NA	NA	0.0800951	0.0419193	0.0144699	0.700145	0.0165488	0.0520658	NA	NA	NA	NA	NA	NA	0.0373371	0.217866	NA	NA	NA	NA	0.435302	0.0343856	NA	NA	NA	NA	0.141905	0.0095849	NA	NA	NA	NA	NA	NA	NA	NA	NA	NA	0.197246	0.0295593	0.00684878	0.586675	0.625274
GO_FIBRILLAR_COLLAGEN_TRIMER	NA	NA	NA	NA	NA	NA	NA	NA	NA	NA	NA	NA	NA	NA	NA	NA	NA	NA	NA	NA	NA	NA	NA	NA	NA	NA	NA	NA	NA	NA	NA	NA	NA	NA	NA	NA	NA	NA	NA	NA	NA	NA	NA	NA	NA	NA	NA	NA	NA
GO_FIBRINOLYSIS	NA	NA	NA	NA	NA	NA	NA	NA	NA	NA	NA	NA	NA	NA	NA	NA	NA	NA	0.0128715	NA	NA	NA	NA	NA	NA	NA	NA	NA	NA	NA	NA	NA	NA	NA	NA	NA	NA	NA	NA	NA	NA	NA	NA	NA	NA	NA	NA	NA	NA
GO_FIBROBLAST_GROWTH_FACTOR_BINDING	NA	NA	NA	NA	NA	0.0424986	NA	NA	NA	NA	NA	NA	NA	NA	NA	NA	NA	NA	NA	NA	NA	NA	NA	NA	NA	NA	NA	NA	NA	NA	NA	0.0218749	NA	NA	NA	NA	NA	NA	NA	NA	NA	NA	NA	0.025145	NA	NA	NA	NA	NA
GO_FIBROBLAST_GROWTH_FACTOR_PRODUCTION	NA	NA	NA	NA	NA	NA	NA	NA	NA	NA	NA	NA	NA	NA	NA	NA	NA	NA	NA	NA	NA	NA	NA	NA	NA	NA	0.00668999	NA	NA	NA	NA	NA	NA	NA	NA	NA	NA	NA	NA	NA	NA	NA	NA	NA	NA	NA	NA	NA	NA
GO_FIBROBLAST_GROWTH_FACTOR_RECEPTOR_SIGNALING_PATHWAY	NA	NA	NA	NA	NA	NA	NA	NA	NA	NA	NA	NA	NA	NA	NA	NA	NA	NA	NA	NA	NA	NA	NA	NA	NA	NA	NA	NA	NA	NA	NA	NA	NA	NA	NA	NA	NA	NA	NA	NA	NA	NA	0.756087	0.0387657	NA	NA	NA	NA	NA
GO_FIBROBLAST_MIGRATION	NA	NA	NA	NA	NA	NA	NA	NA	NA	NA	NA	NA	NA	NA	0.0414222	NA	0.0347213	0.565893	NA	NA	NA	NA	NA	NA	NA	NA	NA	NA	NA	NA	0.0165607	0.0771691	NA	NA	NA	NA	0.346989	0.00845995	NA	NA	NA	NA	NA	NA	NA	NA	NA	NA	NA
GO_FIBROBLAST_PROLIFERATION	NA	NA	NA	NA	NA	0.0326539	NA	NA	NA	0.00148884	NA	NA	NA	NA	NA	NA	NA	NA	NA	NA	0.0319206	0.435938	NA	NA	NA	NA	NA	NA	NA	NA	NA	NA	NA	NA	NA	NA	NA	NA	NA	NA	NA	NA	NA	NA	NA	NA	0.423081	0.0392865	NA
GO_FIBRONECTIN_BINDING	NA	0.00974036	0.290581	0.0453088	NA	NA	NA	NA	NA	NA	NA	NA	NA	NA	NA	NA	NA	NA	NA	NA	NA	NA	NA	NA	NA	NA	NA	NA	NA	NA	NA	NA	NA	NA	NA	NA	0.221211	0.0249365	NA	NA	NA	NA	NA	NA	NA	NA	NA	NA	NA
GO_FICOLIN_1_RICH_GRANULE	NA	NA	NA	NA	NA	NA	NA	NA	NA	NA	0.0491823	0.685767	NA	NA	NA	NA	0.304532	0.0245406	0.000619469	0.238722	NA	NA	NA	NA	0.0900598	0.0268375	NA	NA	NA	NA	NA	NA	NA	NA	0.130404	0.0235656	NA	NA	0.0214109	0.143845	NA	NA	0.00362803	0.149577	NA	NA	NA	NA	NA
GO_FICOLIN_1_RICH_GRANULE_MEMBRANE	NA	NA	NA	NA	NA	NA	NA	NA	NA	NA	NA	NA	NA	NA	NA	NA	NA	NA	NA	NA	NA	NA	NA	NA	NA	NA	NA	NA	NA	NA	NA	NA	NA	NA	NA	NA	NA	NA	NA	NA	0.0024423	0.606789	NA	NA	0.517272	0.00893122	NA	NA	NA
GO_FILAMENTOUS_ACTIN	0.0314689	NA	NA	NA	NA	NA	0.0157674	0.400423	NA	NA	NA	NA	0.0496647	NA	NA	NA	0.0931577	0.0210347	0.470065	0.0280812	NA	NA	NA	NA	NA	NA	0.316055	0.0388655	0.0161737	0.272178	NA	NA	NA	NA	NA	NA	NA	NA	NA	NA	NA	NA	NA	NA	NA	NA	NA	NA	NA
GO_FILAMIN_BINDING	NA	NA	NA	NA	NA	NA	NA	NA	NA	NA	NA	NA	NA	NA	NA	NA	NA	NA	NA	NA	NA	NA	NA	NA	NA	NA	NA	NA	NA	NA	NA	NA	NA	NA	NA	NA	NA	NA	NA	NA	NA	NA	NA	NA	NA	NA	0.187287	0.0137662	NA
GO_FILOPODIUM	NA	NA	NA	NA	NA	NA	NA	NA	0.0406231	0.46317	NA	NA	0.750849	0.00641445	NA	NA	0.493569	0.00302386	NA	NA	NA	NA	NA	NA	NA	NA	NA	NA	NA	NA	NA	NA	NA	NA	NA	NA	NA	NA	NA	NA	NA	NA	NA	NA	NA	NA	0.035722	0.0785422	NA
GO_FILOPODIUM_ASSEMBLY	NA	NA	NA	NA	NA	NA	NA	NA	NA	NA	NA	NA	0.789735	0.00262478	NA	NA	NA	NA	NA	NA	NA	NA	NA	NA	NA	NA	NA	NA	NA	NA	NA	NA	NA	NA	NA	NA	NA	NA	0.0342138	NA	NA	NA	NA	NA	NA	NA	0.0205357	NA	NA
GO_FILOPODIUM_MEMBRANE	NA	NA	NA	NA	NA	NA	NA	0.0306276	NA	NA	NA	NA	NA	NA	NA	NA	NA	NA	NA	NA	NA	NA	NA	NA	NA	NA	NA	NA	NA	NA	NA	NA	NA	NA	NA	NA	NA	NA	NA	NA	NA	NA	NA	NA	NA	NA	NA	NA	NA
GO_FILOPODIUM_TIP	NA	NA	NA	NA	NA	NA	NA	NA	NA	NA	NA	NA	NA	0.0315828	0.0357233	NA	0.24625	0.0407011	NA	NA	NA	NA	NA	NA	NA	NA	NA	NA	NA	NA	NA	NA	NA	0.0136668	NA	NA	NA	NA	NA	NA	NA	NA	NA	NA	NA	NA	NA	NA	NA
GO_FLAVIN_ADENINE_DINUCLEOTIDE_BINDING	NA	NA	NA	NA	NA	NA	NA	NA	NA	NA	NA	NA	NA	NA	NA	NA	NA	NA	NA	NA	0.0284354	0.42426	NA	NA	NA	NA	NA	NA	0.0429582	0.181834	NA	NA	NA	NA	0.0486944	0.158043	NA	NA	0.0570101	0.00953536	NA	NA	NA	NA	NA	NA	NA	NA	NA
GO_FLEMMING_BODY	NA	NA	NA	NA	NA	NA	NA	NA	NA	NA	NA	0.0332784	NA	NA	NA	NA	NA	NA	NA	NA	NA	NA	NA	NA	0.0210521	NA	NA	NA	NA	NA	NA	NA	NA	NA	NA	NA	NA	NA	NA	NA	NA	NA	NA	NA	NA	NA	NA	NA	NA
GO_FLUID_TRANSPORT	NA	NA	NA	NA	NA	NA	NA	NA	NA	NA	NA	NA	NA	NA	NA	NA	NA	NA	NA	NA	NA	NA	NA	NA	NA	NA	NA	NA	NA	NA	NA	NA	NA	NA	NA	NA	NA	NA	NA	NA	NA	NA	NA	NA	NA	NA	NA	NA	NA
GO_FMN_BINDING	NA	NA	0.184035	0.000985905	NA	NA	0.0266982	0.219566	NA	NA	NA	NA	NA	NA	NA	NA	NA	NA	NA	NA	NA	NA	NA	NA	NA	NA	NA	NA	NA	NA	NA	NA	NA	NA	NA	NA	NA	NA	NA	NA	NA	NA	NA	NA	NA	NA	NA	NA	NA
GO_FOAM_CELL_DIFFERENTIATION	NA	NA	NA	NA	NA	NA	NA	NA	NA	NA	NA	NA	NA	NA	NA	NA	NA	NA	NA	NA	NA	NA	NA	NA	NA	NA	0.00927101	0.303653	NA	NA	NA	NA	0.0561839	0.00639898	NA	NA	NA	NA	NA	NA	NA	NA	NA	NA	NA	NA	NA	NA	0.0333735
GO_FOCAL_ADHESION_ASSEMBLY	NA	NA	NA	NA	NA	NA	0.0109302	0.72425	NA	NA	NA	NA	0.157192	4.63097e-05	0.000478242	0.239038	0.139586	0.000121909	NA	NA	0.000180766	0.432072	NA	NA	NA	NA	NA	NA	NA	NA	0.253348	0.00145872	NA	NA	NA	NA	NA	NA	0.0595176	0.0101897	NA	NA	NA	NA	NA	0.00508388	NA	NA	0.467828
GO_FOLIC_ACID_CONTAINING_COMPOUND_BIOSYNTHETIC_PROCESS	NA	NA	NA	NA	NA	NA	NA	NA	NA	NA	NA	NA	NA	NA	NA	NA	NA	NA	NA	NA	NA	NA	NA	NA	NA	NA	NA	NA	NA	NA	NA	NA	NA	NA	NA	NA	NA	NA	NA	NA	NA	NA	NA	NA	NA	NA	NA	NA	NA
GO_FOLIC_ACID_CONTAINING_COMPOUND_METABOLIC_PROCESS	NA	NA	NA	NA	NA	NA	NA	NA	NA	NA	NA	NA	NA	NA	NA	NA	NA	NA	NA	NA	NA	NA	NA	NA	NA	NA	NA	NA	NA	NA	0.0421701	0.245154	NA	NA	NA	NA	NA	NA	NA	NA	NA	NA	NA	NA	NA	NA	NA	NA	NA
GO_FOLIC_ACID_METABOLIC_PROCESS	NA	NA	NA	NA	NA	NA	NA	NA	NA	NA	NA	NA	NA	NA	NA	NA	NA	NA	NA	NA	NA	NA	NA	NA	NA	NA	NA	NA	NA	NA	0.0225251	0.18196	NA	NA	NA	NA	NA	NA	NA	NA	NA	NA	NA	NA	NA	NA	0.0453647	0.264172	NA
GO_FOREBRAIN_CELL_MIGRATION	NA	NA	NA	NA	NA	NA	NA	NA	NA	NA	NA	NA	NA	NA	NA	NA	NA	NA	NA	NA	NA	NA	NA	NA	NA	NA	NA	NA	NA	NA	NA	NA	NA	NA	0.0208	0.399628	NA	NA	NA	NA	NA	NA	NA	NA	NA	NA	NA	NA	NA
GO_FOREBRAIN_GENERATION_OF_NEURONS	NA	NA	NA	NA	NA	NA	NA	NA	NA	NA	NA	NA	NA	NA	NA	NA	NA	NA	NA	NA	NA	NA	NA	NA	NA	NA	NA	NA	NA	NA	NA	NA	NA	NA	NA	NA	NA	NA	NA	NA	NA	NA	NA	NA	NA	NA	NA	NA	NA
GO_FOREBRAIN_NEURON_DEVELOPMENT	NA	NA	NA	NA	NA	NA	NA	NA	NA	NA	NA	NA	NA	NA	NA	NA	NA	NA	NA	NA	NA	NA	NA	NA	NA	NA	NA	NA	NA	NA	NA	NA	NA	NA	NA	NA	NA	NA	NA	NA	NA	NA	NA	NA	NA	0.0467645	NA	NA	NA
GO_FORELIMB_MORPHOGENESIS	NA	NA	NA	NA	NA	NA	NA	NA	NA	NA	NA	NA	NA	NA	NA	NA	NA	NA	NA	NA	NA	NA	NA	NA	NA	NA	NA	NA	NA	NA	NA	NA	NA	NA	NA	NA	NA	NA	NA	NA	NA	NA	NA	NA	NA	NA	NA	0.0242768	NA
GO_FORMATION_OF_CYTOPLASMIC_TRANSLATION_INITIATION_COMPLEX	NA	NA	NA	NA	NA	NA	NA	8.60003e-05	NA	NA	NA	NA	0.00697496	NA	NA	NA	0.222188	0.0326791	NA	NA	NA	NA	NA	NA	NA	NA	NA	NA	NA	NA	NA	NA	NA	NA	NA	NA	NA	NA	NA	NA	NA	NA	NA	NA	NA	NA	NA	NA	NA
GO_FORMATION_OF_PRIMARY_GERM_LAYER	NA	NA	NA	NA	NA	NA	NA	NA	NA	NA	NA	NA	NA	NA	NA	NA	NA	NA	NA	NA	NA	NA	NA	NA	NA	NA	NA	0.00723779	NA	NA	NA	NA	NA	NA	0.725348	0.00520215	NA	NA	0.0227843	NA	NA	NA	NA	NA	NA	NA	NA	NA	NA
GO_FRUCTOSE_METABOLIC_PROCESS	NA	NA	NA	NA	NA	NA	NA	NA	NA	NA	NA	NA	NA	NA	NA	NA	NA	NA	NA	NA	NA	NA	NA	NA	NA	NA	NA	NA	NA	NA	NA	NA	NA	NA	NA	NA	NA	NA	NA	NA	NA	NA	NA	NA	NA	NA	NA	NA	NA
GO_FUCOSYLATION	NA	0.00391236	NA	NA	NA	NA	NA	NA	NA	NA	NA	NA	NA	NA	NA	NA	NA	NA	NA	NA	NA	NA	NA	NA	NA	NA	NA	NA	NA	NA	NA	NA	NA	NA	NA	NA	NA	NA	NA	NA	NA	NA	NA	NA	NA	NA	NA	NA	NA
GO_G_PROTEIN_COUPLED_ACETYLCHOLINE_RECEPTOR_SIGNALING_PATHWAY	NA	NA	NA	NA	NA	NA	NA	NA	NA	NA	NA	NA	NA	NA	NA	NA	NA	0.044961	NA	NA	NA	NA	NA	NA	NA	NA	NA	NA	NA	NA	NA	NA	NA	NA	NA	NA	NA	NA	NA	NA	NA	NA	NA	NA	NA	NA	NA	NA	NA
GO_G_PROTEIN_COUPLED_GLUTAMATE_RECEPTOR_SIGNALING_PATHWAY	0.006908	NA	NA	NA	NA	NA	NA	NA	NA	NA	NA	NA	NA	NA	NA	NA	NA	NA	NA	NA	NA	NA	NA	NA	NA	NA	NA	NA	NA	NA	NA	NA	NA	NA	NA	NA	NA	NA	NA	NA	NA	NA	NA	NA	NA	NA	NA	NA	NA
GO_G_PROTEIN_COUPLED_RECEPTOR_INTERNALIZATION	NA	NA	NA	NA	NA	NA	NA	NA	NA	NA	NA	NA	NA	NA	NA	NA	NA	0.00323725	NA	NA	NA	NA	NA	NA	NA	NA	NA	NA	NA	NA	NA	NA	NA	NA	0.0124704	0.138761	0.0104771	NA	NA	NA	NA	NA	NA	NA	NA	NA	NA	NA	NA
GO_G_QUADRUPLEX_DNA_BINDING	NA	NA	NA	NA	NA	NA	NA	NA	NA	NA	NA	NA	NA	NA	NA	NA	NA	NA	NA	NA	NA	NA	NA	NA	NA	NA	NA	NA	NA	NA	NA	NA	NA	NA	NA	NA	NA	NA	NA	NA	NA	NA	NA	NA	NA	NA	NA	NA	NA
GO_G_RICH_STRAND_TELOMERIC_DNA_BINDING	NA	NA	NA	NA	NA	NA	NA	NA	NA	NA	NA	NA	0.0249441	0.145762	NA	NA	NA	NA	NA	NA	0.00842041	0.0657718	NA	NA	NA	NA	NA	NA	NA	NA	NA	NA	NA	NA	NA	NA	NA	NA	NA	NA	NA	NA	NA	NA	NA	NA	NA	NA	NA
GO_G0_TO_G1_TRANSITION	NA	NA	NA	NA	NA	NA	NA	NA	NA	NA	NA	NA	NA	NA	NA	NA	NA	NA	NA	NA	NA	NA	0.0058626	NA	0.0114593	0.0657698	NA	NA	NA	NA	NA	NA	NA	NA	NA	NA	NA	NA	NA	NA	NA	NA	NA	NA	NA	NA	NA	NA	NA
GO_G2_DNA_DAMAGE_CHECKPOINT	NA	NA	NA	NA	NA	NA	NA	NA	NA	NA	NA	NA	NA	NA	NA	NA	NA	NA	NA	NA	NA	NA	NA	NA	4.60986e-06	NA	NA	NA	NA	NA	NA	NA	NA	NA	NA	NA	NA	NA	NA	NA	NA	NA	NA	NA	NA	NA	NA	NA	NA
GO_GALACTOSE_METABOLIC_PROCESS	NA	NA	NA	NA	NA	NA	NA	NA	0.0215316	0.175127	NA	NA	0.0411421	NA	NA	NA	NA	NA	NA	NA	NA	NA	NA	NA	NA	NA	NA	NA	NA	NA	NA	NA	NA	NA	NA	NA	NA	NA	NA	NA	NA	NA	NA	NA	NA	NA	NA	NA	NA
GO_GAMMA_AMINOBUTYRIC_ACID_SECRETION	NA	NA	NA	NA	NA	NA	NA	NA	NA	NA	NA	NA	0.0249441	NA	NA	NA	NA	NA	NA	NA	NA	NA	NA	NA	NA	NA	NA	NA	NA	NA	NA	NA	NA	NA	NA	NA	NA	NA	NA	NA	NA	NA	NA	NA	NA	NA	NA	NA	NA
GO_GAMMA_CATENIN_BINDING	NA	NA	NA	NA	NA	NA	NA	NA	0.0184327	0.162816	NA	NA	NA	NA	NA	NA	NA	NA	NA	NA	NA	NA	NA	NA	NA	NA	NA	NA	NA	NA	NA	NA	NA	NA	NA	NA	NA	NA	NA	NA	NA	NA	NA	NA	NA	NA	NA	NA	NA
GO_GAMMA_DELTA_T_CELL_ACTIVATION	NA	NA	NA	NA	NA	NA	NA	NA	NA	NA	NA	NA	NA	NA	NA	NA	NA	NA	NA	NA	NA	NA	NA	NA	NA	NA	NA	NA	NA	NA	NA	NA	NA	NA	NA	NA	NA	NA	NA	NA	NA	NA	NA	NA	0.00138312	NA	NA	NA	NA
GO_GAMMA_DELTA_T_CELL_DIFFERENTIATION	NA	NA	NA	NA	NA	NA	NA	NA	NA	NA	NA	NA	NA	NA	NA	NA	NA	NA	NA	NA	NA	NA	NA	NA	NA	NA	NA	NA	NA	NA	NA	NA	NA	NA	NA	NA	NA	NA	NA	NA	NA	NA	NA	NA	0.00853292	NA	NA	NA	NA
GO_GAMMA_TUBULIN_BINDING	NA	NA	NA	NA	NA	NA	NA	NA	0.0130739	0.33955	0.0382037	NA	NA	NA	NA	NA	NA	NA	NA	NA	NA	NA	NA	NA	NA	NA	NA	NA	NA	NA	NA	NA	NA	NA	NA	NA	NA	NA	NA	NA	NA	NA	0.283957	0.0362782	NA	NA	NA	NA	NA
GO_GAMMA_TUBULIN_COMPLEX	NA	NA	NA	NA	NA	NA	0.0443347	0.277775	NA	NA	NA	NA	NA	NA	NA	NA	NA	NA	NA	NA	NA	NA	NA	NA	NA	NA	NA	NA	NA	NA	NA	NA	NA	NA	NA	NA	NA	NA	NA	NA	NA	NA	NA	NA	NA	NA	NA	NA	NA
GO_GANGLIOSIDE_BIOSYNTHETIC_PROCESS	NA	NA	NA	NA	NA	NA	NA	NA	NA	NA	NA	NA	NA	NA	NA	NA	0.0168401	NA	0.0245564	NA	NA	NA	NA	NA	NA	NA	NA	NA	NA	NA	NA	NA	NA	NA	NA	NA	NA	NA	NA	NA	NA	NA	NA	NA	NA	NA	NA	NA	NA
GO_GANGLIOSIDE_METABOLIC_PROCESS	NA	NA	NA	NA	NA	0.0391659	NA	NA	NA	NA	NA	NA	NA	NA	NA	NA	0.00462634	NA	0.00806269	NA	NA	NA	NA	NA	NA	NA	NA	NA	NA	NA	NA	NA	NA	NA	NA	NA	NA	NA	NA	NA	NA	NA	NA	NA	NA	NA	NA	NA	NA
GO_GASTRULATION	NA	NA	NA	NA	NA	NA	NA	NA	NA	NA	NA	NA	NA	NA	0.014394	0.629086	NA	NA	NA	NA	NA	NA	NA	NA	NA	NA	0.887472	0.0341546	NA	NA	NA	NA	NA	NA	0.570828	0.0254232	NA	NA	0.0127	0.641161	0.0271642	0.0685203	NA	NA	NA	NA	0.962424	0.0258951	NA
GO_GDP_BINDING	NA	NA	NA	NA	NA	NA	NA	NA	NA	NA	NA	NA	NA	NA	NA	NA	NA	NA	NA	NA	NA	NA	NA	NA	NA	NA	NA	NA	NA	NA	NA	NA	NA	NA	NA	NA	NA	NA	NA	NA	NA	NA	NA	NA	NA	NA	NA	NA	NA
GO_GDP_DISSOCIATION_INHIBITOR_ACTIVITY	NA	NA	NA	NA	NA	NA	NA	NA	NA	NA	NA	NA	NA	NA	NA	NA	0.222188	0.0326791	NA	0.00370274	NA	NA	NA	NA	NA	NA	NA	NA	NA	NA	NA	NA	NA	NA	NA	NA	NA	NA	NA	NA	NA	NA	NA	NA	NA	NA	NA	NA	NA
GO_GDP_METABOLIC_PROCESS	NA	NA	NA	NA	0.00606052	0.134466	NA	NA	NA	NA	NA	NA	NA	NA	NA	NA	NA	NA	0.0147096	0.183613	NA	NA	NA	NA	NA	NA	NA	NA	NA	NA	NA	NA	NA	NA	NA	NA	NA	NA	NA	NA	NA	NA	NA	NA	NA	NA	NA	NA	NA
GO_GEMINI_OF_COILED_BODIES	NA	NA	NA	NA	NA	NA	NA	NA	NA	NA	NA	NA	NA	NA	NA	NA	NA	NA	0.0210399	NA	NA	NA	NA	NA	NA	NA	NA	NA	NA	NA	NA	NA	NA	NA	0.00625538	NA	NA	NA	NA	NA	NA	NA	NA	NA	NA	NA	NA	0.0137662	NA
GO_GENERAL_TRANSCRIPTION_INITIATION_FACTOR_ACTIVITY	NA	NA	NA	NA	NA	NA	NA	NA	NA	NA	NA	NA	NA	NA	NA	NA	NA	NA	NA	NA	NA	NA	NA	0.0392829	NA	NA	NA	NA	NA	NA	NA	NA	NA	NA	NA	NA	NA	NA	NA	NA	NA	NA	NA	NA	NA	NA	NA	0.0274921	NA
GO_GENERAL_TRANSCRIPTION_INITIATION_FACTOR_BINDING	NA	NA	NA	NA	NA	NA	0.0336571	0.494516	NA	NA	NA	NA	NA	NA	NA	NA	NA	NA	NA	NA	NA	NA	NA	NA	NA	NA	NA	NA	NA	NA	NA	NA	NA	NA	NA	NA	NA	NA	NA	NA	NA	NA	NA	NA	NA	NA	NA	NA	NA
GO_GENETIC_IMPRINTING	NA	NA	NA	NA	NA	NA	NA	NA	NA	NA	NA	NA	NA	NA	NA	NA	NA	NA	NA	NA	0.321072	0.000790497	NA	NA	NA	NA	NA	NA	NA	NA	NA	NA	NA	NA	NA	NA	NA	NA	NA	NA	NA	NA	NA	NA	NA	NA	NA	NA	NA
GO_GENITALIA_MORPHOGENESIS	NA	NA	NA	NA	NA	NA	NA	NA	NA	NA	NA	NA	NA	NA	NA	NA	NA	NA	NA	NA	NA	NA	NA	NA	NA	NA	NA	NA	NA	NA	NA	NA	NA	NA	NA	NA	NA	NA	NA	NA	NA	NA	NA	NA	NA	NA	NA	0.0186052	NA
GO_GERM_CELL_NUCLEUS	NA	NA	NA	NA	NA	NA	NA	NA	NA	NA	NA	NA	NA	NA	NA	NA	NA	NA	NA	NA	NA	NA	NA	NA	0.00537175	NA	NA	NA	NA	NA	NA	NA	NA	NA	NA	NA	NA	NA	NA	NA	NA	0.0330579	NA	NA	NA	NA	NA	NA	NA
GO_GERMINAL_CENTER_FORMATION	NA	NA	NA	NA	NA	NA	NA	NA	NA	NA	NA	NA	NA	NA	NA	NA	NA	NA	NA	NA	NA	NA	NA	NA	NA	NA	NA	NA	NA	NA	NA	NA	NA	NA	NA	NA	NA	NA	NA	NA	NA	NA	NA	NA	NA	NA	NA	NA	0.00558051
GO_GLAND_DEVELOPMENT	NA	NA	0.0256379	0.198948	NA	NA	NA	NA	NA	NA	NA	NA	NA	NA	NA	NA	NA	NA	NA	NA	NA	NA	NA	NA	NA	NA	NA	NA	NA	NA	NA	NA	NA	NA	NA	NA	NA	NA	NA	NA	0.0419379	0.509385	NA	NA	NA	NA	NA	NA	NA
GO_GLAND_MORPHOGENESIS	NA	NA	0.206717	0.020632	NA	NA	NA	NA	NA	NA	NA	NA	NA	NA	NA	NA	NA	NA	NA	NA	NA	NA	NA	NA	NA	NA	NA	NA	NA	NA	NA	NA	NA	NA	NA	NA	NA	NA	NA	NA	NA	NA	NA	NA	NA	NA	NA	NA	NA
GO_GLANDULAR_EPITHELIAL_CELL_DEVELOPMENT	NA	NA	NA	NA	NA	NA	NA	NA	NA	NA	NA	NA	NA	NA	NA	NA	NA	NA	NA	NA	NA	NA	NA	NA	NA	NA	NA	NA	NA	NA	NA	NA	NA	NA	NA	NA	NA	NA	NA	NA	NA	NA	NA	NA	0.0377045	0.295087	NA	NA	NA
GO_GLIAL_CELL_APOPTOTIC_PROCESS	NA	NA	NA	NA	0.0135942	NA	NA	NA	0.235646	0.0199195	NA	NA	NA	NA	NA	NA	NA	NA	NA	NA	0.01875	NA	NA	NA	NA	NA	NA	NA	NA	NA	NA	NA	NA	NA	NA	NA	NA	NA	NA	NA	NA	NA	NA	NA	NA	NA	NA	NA	NA
GO_GLIAL_CELL_DEVELOPMENT	NA	NA	NA	NA	NA	NA	NA	NA	NA	NA	NA	NA	NA	NA	NA	NA	0.296024	0.022874	NA	NA	NA	NA	NA	NA	NA	NA	NA	NA	NA	NA	NA	NA	NA	NA	NA	NA	NA	NA	NA	NA	NA	NA	NA	NA	NA	NA	NA	NA	NA
GO_GLIAL_CELL_DIFFERENTIATION	NA	NA	NA	NA	NA	NA	NA	NA	NA	NA	NA	NA	0.0319878	0.152397	NA	NA	NA	NA	NA	NA	NA	NA	NA	NA	NA	NA	NA	NA	NA	NA	NA	NA	NA	NA	NA	NA	NA	NA	NA	NA	NA	NA	0.290784	0.0385464	NA	NA	NA	NA	NA
GO_GLIAL_CELL_MIGRATION	NA	NA	NA	NA	NA	NA	NA	NA	NA	NA	NA	NA	NA	NA	NA	NA	NA	NA	NA	NA	NA	NA	NA	NA	NA	NA	NA	NA	NA	NA	NA	NA	NA	NA	NA	NA	NA	NA	NA	NA	NA	NA	NA	NA	NA	NA	NA	NA	NA
GO_GLIAL_CELL_PROJECTION	NA	NA	NA	NA	NA	NA	NA	NA	NA	NA	NA	NA	NA	NA	NA	NA	NA	NA	NA	NA	NA	NA	NA	NA	NA	NA	NA	0.00402834	NA	NA	NA	NA	NA	NA	0.0460157	NA	NA	NA	NA	NA	0.0151284	0.0936499	NA	NA	NA	NA	NA	NA	NA
GO_GLIAL_CELL_PROLIFERATION	NA	NA	NA	NA	NA	NA	NA	NA	NA	NA	NA	NA	NA	NA	NA	NA	NA	NA	NA	NA	NA	NA	NA	NA	NA	NA	NA	NA	NA	NA	NA	NA	NA	0.0136268	NA	NA	NA	NA	NA	NA	NA	NA	NA	NA	NA	NA	NA	NA	NA
GO_GLIOGENESIS	NA	NA	NA	NA	NA	NA	NA	NA	NA	NA	NA	NA	NA	NA	NA	NA	NA	NA	NA	NA	NA	NA	NA	NA	NA	NA	NA	NA	NA	NA	NA	NA	NA	NA	NA	NA	NA	NA	NA	NA	NA	NA	NA	NA	NA	NA	NA	NA	NA
GO_GLOBAL_GENOME_NUCLEOTIDE_EXCISION_REPAIR	NA	NA	NA	0.042297	NA	NA	NA	NA	NA	NA	NA	NA	0.000422604	0.336209	NA	NA	NA	NA	NA	NA	NA	NA	NA	NA	NA	NA	NA	NA	NA	NA	NA	NA	NA	NA	NA	NA	NA	NA	NA	NA	NA	NA	NA	NA	NA	NA	NA	NA	NA
GO_GLOMERULAR_EPITHELIAL_CELL_DEVELOPMENT	NA	NA	NA	NA	NA	NA	NA	NA	NA	NA	NA	NA	NA	NA	NA	NA	NA	NA	NA	NA	NA	NA	NA	NA	NA	NA	NA	NA	NA	NA	NA	NA	NA	NA	NA	NA	NA	NA	NA	NA	NA	NA	NA	NA	NA	NA	NA	NA	NA
GO_GLOMERULAR_EPITHELIAL_CELL_DIFFERENTIATION	NA	NA	NA	NA	NA	NA	NA	NA	NA	NA	NA	NA	NA	NA	NA	NA	NA	NA	NA	NA	NA	NA	NA	NA	NA	NA	NA	NA	NA	NA	NA	NA	NA	NA	NA	NA	NA	NA	NA	NA	NA	NA	NA	NA	NA	NA	NA	NA	NA
GO_GLOMERULAR_EPITHELIUM_DEVELOPMENT	NA	NA	NA	NA	NA	NA	NA	NA	NA	NA	NA	NA	NA	NA	NA	NA	NA	NA	NA	NA	NA	NA	NA	NA	NA	NA	NA	NA	NA	NA	NA	NA	NA	NA	NA	NA	NA	NA	NA	NA	NA	NA	NA	NA	NA	NA	NA	NA	NA
GO_GLOMERULUS_DEVELOPMENT	NA	NA	NA	NA	NA	NA	NA	NA	NA	NA	NA	NA	NA	NA	NA	NA	NA	NA	NA	NA	NA	NA	NA	NA	NA	NA	NA	NA	NA	NA	NA	NA	NA	NA	NA	NA	NA	NA	NA	NA	NA	NA	NA	NA	NA	NA	NA	NA	NA
GO_GLUCOCORTICOID_RECEPTOR_BINDING	NA	NA	NA	NA	NA	NA	NA	NA	NA	NA	NA	NA	NA	NA	0.0253324	NA	0.0222109	NA	0.0322421	0.26239	NA	NA	NA	NA	NA	NA	0.0123938	0.133049	NA	NA	0.161817	0.00956494	NA	NA	0.141169	0.000276705	NA	0.00801079	NA	NA	0.0216622	NA	NA	0.0110394	NA	NA	NA	NA	0.10756
GO_GLUCOSAMINE_CONTAINING_COMPOUND_METABOLIC_PROCESS	NA	NA	NA	NA	NA	NA	NA	NA	NA	NA	NA	NA	NA	NA	NA	NA	NA	NA	NA	NA	NA	NA	NA	NA	NA	NA	NA	NA	NA	NA	NA	NA	NA	NA	0.231918	0.0215336	NA	NA	NA	NA	NA	NA	0.266656	0.0316301	NA	NA	NA	NA	NA
GO_GLUCOSE_6_PHOSPHATE_METABOLIC_PROCESS	NA	NA	NA	NA	NA	NA	NA	NA	NA	NA	NA	NA	NA	NA	NA	NA	NA	NA	NA	NA	NA	NA	NA	NA	NA	NA	NA	NA	NA	NA	NA	NA	NA	NA	NA	NA	NA	NA	NA	NA	NA	NA	NA	NA	NA	NA	NA	NA	NA
GO_GLUCOSE_BINDING	NA	NA	NA	NA	NA	NA	NA	NA	NA	NA	NA	NA	NA	NA	NA	NA	NA	NA	NA	NA	NA	NA	NA	NA	NA	NA	NA	NA	NA	NA	NA	NA	NA	NA	NA	NA	NA	NA	NA	NA	NA	0.011512	0.00716641	0.112253	NA	NA	NA	NA	NA
GO_GLUCOSE_CATABOLIC_PROCESS	NA	NA	NA	NA	NA	NA	NA	NA	NA	NA	NA	NA	NA	NA	NA	NA	NA	NA	NA	NA	NA	NA	NA	NA	NA	NA	NA	NA	NA	NA	NA	NA	NA	NA	NA	NA	NA	NA	NA	0.0160431	NA	NA	NA	NA	NA	NA	NA	NA	NA
GO_GLUCOSE_IMPORT	NA	NA	NA	NA	NA	NA	NA	NA	NA	NA	NA	NA	0.0407962	0.693825	NA	NA	0.692613	0.0112322	NA	NA	NA	NA	0.0220703	NA	NA	NA	NA	NA	NA	NA	NA	NA	NA	NA	NA	NA	NA	NA	NA	NA	NA	NA	NA	NA	NA	NA	NA	NA	NA
GO_GLUCOSE_METABOLIC_PROCESS	NA	NA	NA	NA	NA	NA	0.262557	0.017943	NA	NA	NA	NA	NA	NA	NA	NA	0.241807	0.0399035	NA	NA	NA	NA	NA	NA	NA	NA	NA	NA	NA	NA	NA	NA	NA	NA	NA	NA	NA	NA	NA	0.0285058	0.113053	0.0451011	0.0425078	0.405713	NA	NA	NA	NA	NA
GO_GLUCOSIDASE_ACTIVITY	NA	NA	NA	NA	NA	NA	NA	NA	NA	NA	NA	NA	NA	NA	NA	NA	NA	NA	NA	NA	NA	NA	NA	NA	0.0285789	NA	NA	NA	NA	NA	NA	NA	NA	NA	NA	NA	NA	NA	NA	NA	0.018964	NA	NA	NA	NA	0.0145352	NA	NA	NA
GO_GLUCOSYLTRANSFERASE_ACTIVITY	NA	NA	NA	NA	NA	NA	NA	NA	NA	NA	NA	NA	NA	NA	NA	NA	NA	NA	NA	NA	NA	NA	NA	NA	0.0457066	NA	NA	NA	NA	NA	NA	NA	NA	NA	NA	NA	NA	NA	NA	NA	0.0306276	NA	NA	NA	NA	NA	NA	NA	NA
GO_GLUTAMATE_BINDING	NA	NA	NA	NA	NA	NA	NA	NA	NA	NA	NA	NA	NA	NA	NA	NA	NA	NA	NA	NA	NA	NA	NA	0.00228915	NA	NA	NA	NA	NA	NA	NA	NA	NA	NA	NA	NA	NA	NA	NA	NA	NA	NA	NA	NA	NA	NA	NA	NA	NA
GO_GLUTAMATE_METABOLIC_PROCESS	NA	NA	NA	NA	NA	NA	NA	NA	NA	NA	NA	NA	NA	NA	NA	NA	NA	NA	NA	NA	NA	NA	NA	NA	NA	NA	NA	NA	NA	NA	NA	NA	NA	0.0427896	NA	NA	NA	NA	NA	NA	NA	NA	NA	NA	NA	NA	NA	NA	NA
GO_GLUTAMATE_RECEPTOR_SIGNALING_PATHWAY	NA	NA	NA	NA	NA	NA	NA	NA	0.10528	0.0167072	NA	NA	NA	NA	NA	NA	0.468298	0.00976768	NA	NA	NA	NA	NA	NA	NA	NA	NA	NA	NA	NA	NA	NA	NA	NA	NA	NA	NA	NA	NA	NA	NA	NA	NA	NA	NA	NA	NA	NA	NA
GO_GLUTAMATE_SECRETION	NA	NA	NA	NA	NA	NA	NA	NA	NA	NA	NA	NA	NA	NA	NA	NA	0.506994	0.00852917	NA	NA	NA	NA	NA	NA	NA	NA	NA	NA	NA	NA	NA	NA	NA	NA	NA	NA	NA	NA	NA	NA	NA	NA	NA	NA	NA	NA	NA	NA	NA
GO_GLUTAMATERGIC_SYNAPSE	NA	NA	NA	NA	NA	NA	NA	NA	NA	NA	0.048336	0.119565	0.560271	0.0005942	NA	NA	0.493812	0.000101064	NA	NA	NA	NA	NA	NA	NA	NA	NA	NA	NA	NA	NA	NA	NA	NA	NA	NA	NA	NA	NA	NA	NA	NA	0.804278	0.0165708	NA	NA	NA	NA	NA
GO_GLUTAMINE_FAMILY_AMINO_ACID_METABOLIC_PROCESS	NA	NA	NA	NA	NA	NA	0.340633	0.028373	NA	NA	NA	NA	NA	NA	NA	NA	NA	NA	NA	NA	NA	NA	NA	NA	NA	NA	NA	NA	NA	NA	NA	NA	NA	NA	NA	NA	NA	NA	NA	NA	NA	NA	NA	NA	NA	NA	NA	NA	NA
GO_GLUTAMINE_METABOLIC_PROCESS	0.0159274	NA	NA	NA	NA	0.00417238	NA	0.0481768	NA	NA	NA	NA	NA	NA	NA	NA	NA	NA	NA	NA	NA	NA	NA	NA	NA	NA	NA	NA	NA	NA	NA	NA	NA	NA	NA	NA	NA	NA	NA	NA	NA	0.0048801	NA	NA	NA	NA	NA	NA	NA
GO_GLUTATHIONE_METABOLIC_PROCESS	NA	NA	NA	NA	NA	NA	NA	NA	NA	0.0449887	NA	NA	NA	NA	NA	NA	NA	NA	NA	NA	NA	NA	NA	NA	NA	NA	NA	NA	NA	NA	NA	NA	NA	NA	NA	NA	NA	NA	NA	NA	NA	NA	NA	NA	NA	NA	NA	NA	NA
GO_GLYCEROL_ETHER_METABOLIC_PROCESS	NA	NA	NA	NA	NA	NA	NA	NA	NA	NA	NA	NA	NA	NA	NA	NA	NA	NA	NA	NA	NA	NA	NA	NA	NA	NA	NA	NA	NA	NA	NA	NA	NA	NA	NA	NA	NA	NA	NA	NA	NA	NA	NA	NA	0.00186554	NA	NA	NA	NA
GO_GLYCEROLIPID_BIOSYNTHETIC_PROCESS	NA	NA	NA	NA	NA	NA	NA	NA	NA	NA	5.01612e-05	0.106589	NA	NA	0.0383605	0.0845865	0.0100521	0.11459	NA	NA	NA	NA	0.886446	0.0480915	0.000236438	0.916898	NA	NA	NA	NA	0.00463265	0.0542345	0.0564639	0.019035	NA	NA	0.104732	0.037462	NA	NA	NA	NA	NA	NA	0.00504366	0.0709322	0.0436463	0.392464	0.016839
GO_GLYCEROLIPID_METABOLIC_PROCESS	0.0311328	0.696511	NA	NA	NA	NA	NA	NA	0.011123	0.307765	0.00114689	0.215495	NA	NA	0.0149055	0.361421	0.00348684	0.0506728	0.0392923	0.165636	0.742873	0.0285536	NA	NA	0.00985597	0.560206	NA	NA	NA	NA	0.0135117	0.0703191	0.0129567	0.145012	NA	NA	0.211939	0.0455967	NA	NA	NA	NA	NA	NA	0.00579584	0.128403	NA	NA	NA
GO_GLYCEROPHOSPHOLIPID_CATABOLIC_PROCESS	NA	NA	NA	NA	NA	NA	NA	NA	NA	NA	NA	NA	NA	NA	NA	NA	NA	NA	NA	NA	NA	NA	NA	NA	NA	NA	NA	NA	NA	NA	NA	NA	NA	NA	NA	NA	NA	NA	NA	NA	NA	NA	0.00632251	0.292891	NA	NA	NA	NA	NA
GO_GLYCEROPHOSPHOLIPID_METABOLIC_PROCESS	NA	NA	NA	NA	NA	NA	NA	NA	0.0200722	0.241441	0.000123349	0.10001	0.0533301	0.00303023	0.00531662	0.189569	NA	NA	NA	NA	0.540919	0.0295364	NA	NA	0.00266818	0.607229	NA	NA	NA	NA	0.00244986	0.129874	NA	NA	NA	NA	0.0980315	0.0135122	0.0240049	NA	0.609285	0.0370652	NA	NA	NA	NA	0.03496	0.153752	0.0461763
GO_GLYCINE_METABOLIC_PROCESS	NA	NA	NA	NA	NA	NA	NA	0.0245089	NA	NA	NA	NA	NA	NA	NA	NA	NA	NA	NA	NA	NA	NA	NA	NA	NA	NA	NA	NA	NA	NA	NA	NA	NA	NA	NA	NA	NA	NA	NA	NA	NA	NA	NA	NA	NA	NA	NA	NA	NA
GO_GLYCOGEN_BIOSYNTHETIC_PROCESS	NA	NA	NA	NA	NA	NA	NA	0.0335692	NA	NA	NA	NA	0.691325	0.0056959	NA	NA	0.160636	0.000164051	0.0112511	0.607048	NA	NA	NA	NA	NA	NA	NA	NA	NA	NA	NA	NA	NA	NA	NA	NA	NA	NA	NA	NA	NA	0.0324376	NA	NA	NA	NA	NA	NA	NA
GO_GLYCOLIPID_BINDING	NA	NA	NA	NA	NA	NA	NA	NA	NA	NA	NA	NA	NA	NA	NA	NA	NA	NA	NA	NA	NA	NA	NA	NA	NA	NA	NA	NA	NA	0.023668	0.254928	0.0256038	NA	NA	NA	NA	NA	NA	NA	NA	NA	NA	NA	NA	0.0350728	0.285536	NA	NA	NA
GO_GLYCOLIPID_BIOSYNTHETIC_PROCESS	NA	NA	0.202731	0.00969607	0.0449955	0.0690024	NA	NA	NA	NA	NA	NA	NA	NA	NA	NA	0.00365001	0.698173	0.0370547	0.146818	NA	NA	NA	NA	0.00163406	NA	NA	NA	NA	NA	0.0421759	0.140941	0.0291047	0.484997	NA	NA	0.0230203	0.121422	NA	NA	NA	NA	NA	NA	NA	NA	NA	NA	NA
GO_GLYCOLIPID_CATABOLIC_PROCESS	NA	NA	NA	NA	0.185685	0.0241612	NA	0.0274991	0.0358379	NA	NA	NA	NA	NA	NA	NA	NA	NA	NA	NA	NA	NA	NA	NA	NA	NA	NA	NA	NA	NA	NA	NA	NA	NA	NA	NA	NA	NA	NA	NA	0.00208276	NA	NA	NA	NA	0.0211604	NA	NA	NA
GO_GLYCOLYTIC_PROCESS_THROUGH_FRUCTOSE_6_PHOSPHATE	NA	NA	NA	NA	NA	NA	NA	NA	NA	NA	NA	NA	NA	NA	NA	NA	NA	NA	NA	NA	NA	NA	NA	NA	NA	NA	NA	NA	NA	NA	NA	NA	NA	NA	NA	NA	NA	NA	NA	0.010594	NA	NA	NA	NA	NA	NA	NA	NA	NA
GO_GLYCOPROTEIN_BIOSYNTHETIC_PROCESS	NA	NA	NA	NA	NA	NA	NA	NA	NA	NA	NA	NA	0.0268277	0.904264	NA	NA	NA	NA	NA	NA	NA	NA	NA	NA	0.00252443	0.820009	NA	NA	NA	NA	NA	NA	NA	NA	NA	NA	NA	NA	NA	NA	NA	NA	NA	NA	NA	NA	0.015012	0.150314	NA
GO_GLYCOPROTEIN_CATABOLIC_PROCESS	NA	NA	NA	NA	NA	NA	NA	NA	NA	NA	NA	NA	NA	NA	NA	NA	NA	NA	NA	NA	NA	NA	NA	NA	NA	NA	NA	NA	NA	NA	NA	NA	NA	NA	NA	NA	NA	NA	NA	NA	NA	NA	NA	NA	NA	NA	NA	NA	NA
GO_GLYCOPROTEIN_COMPLEX	NA	NA	NA	NA	NA	NA	NA	NA	NA	NA	NA	NA	NA	NA	NA	NA	NA	NA	NA	NA	NA	NA	NA	NA	NA	NA	NA	NA	NA	NA	NA	NA	NA	NA	NA	NA	NA	NA	NA	NA	NA	0.0330579	NA	NA	NA	NA	NA	NA	NA
GO_GLYCOPROTEIN_METABOLIC_PROCESS	0.680241	0.0273408	NA	NA	NA	NA	NA	NA	NA	NA	NA	NA	NA	NA	NA	NA	NA	NA	NA	NA	NA	NA	NA	NA	0.00628738	0.729247	NA	NA	NA	NA	NA	NA	NA	NA	NA	NA	NA	NA	NA	NA	NA	NA	NA	NA	NA	NA	NA	NA	NA
GO_GLYCOSAMINOGLYCAN_BINDING	0.311505	0.00185028	NA	NA	NA	NA	NA	NA	NA	NA	0.0150122	0.886052	NA	NA	NA	NA	0.0293738	0.239209	NA	NA	0.0183269	0.795579	NA	NA	NA	NA	0.274684	0.0233489	NA	NA	NA	NA	NA	NA	NA	NA	0.360704	0.0197114	0.302918	0.0367137	NA	NA	NA	NA	0.00659194	0.199326	NA	NA	0.0315948
GO_GLYCOSIDE_CATABOLIC_PROCESS	NA	NA	NA	NA	NA	NA	NA	NA	NA	NA	NA	NA	NA	NA	NA	NA	NA	NA	NA	NA	NA	NA	NA	NA	NA	NA	NA	0.00381778	NA	NA	NA	NA	NA	NA	NA	NA	NA	NA	NA	NA	0.00976468	NA	NA	NA	NA	NA	NA	NA	NA
GO_GLYCOSIDE_METABOLIC_PROCESS	NA	NA	NA	NA	NA	NA	NA	NA	NA	NA	NA	NA	NA	NA	NA	0.0229077	NA	NA	NA	NA	NA	NA	NA	NA	NA	NA	NA	0.0166413	NA	NA	NA	NA	NA	NA	NA	NA	NA	NA	NA	NA	0.00389292	NA	NA	NA	NA	NA	NA	NA	NA
GO_GLYCOSPHINGOLIPID_BIOSYNTHETIC_PROCESS	NA	NA	NA	NA	NA	NA	NA	NA	NA	NA	NA	NA	NA	NA	NA	NA	NA	NA	0.0128715	NA	NA	NA	NA	NA	NA	NA	NA	NA	NA	NA	NA	NA	NA	NA	NA	NA	NA	NA	NA	NA	NA	NA	NA	NA	NA	NA	NA	NA	NA
GO_GLYCOSPHINGOLIPID_METABOLIC_PROCESS	NA	NA	NA	NA	NA	NA	NA	NA	0.00591933	0.618612	NA	NA	NA	NA	NA	NA	0.01858	0.692635	0.00790976	0.142126	NA	NA	NA	NA	NA	NA	NA	NA	NA	NA	NA	NA	NA	NA	NA	NA	NA	NA	0.267065	0.0479173	0.0177822	0.630173	NA	NA	NA	NA	NA	NA	NA
GO_GLYCOSYL_COMPOUND_BIOSYNTHETIC_PROCESS	NA	NA	NA	NA	NA	NA	NA	NA	NA	NA	0.0119341	0.330073	NA	NA	NA	NA	0.491233	0.00726466	NA	NA	NA	NA	NA	NA	0.0489332	0.325539	NA	NA	NA	NA	NA	NA	NA	NA	0.353754	0.00627414	NA	NA	NA	NA	NA	NA	NA	NA	NA	NA	NA	NA	NA
GO_GLYCOSYL_COMPOUND_CATABOLIC_PROCESS	NA	NA	NA	NA	NA	NA	NA	NA	NA	NA	NA	NA	NA	NA	NA	NA	NA	NA	NA	NA	NA	NA	NA	NA	0.0461515	0.319326	NA	NA	NA	NA	NA	NA	NA	NA	NA	NA	NA	NA	NA	NA	0.0265414	NA	NA	NA	NA	NA	NA	0.0258575	NA
GO_GLYCOSYL_COMPOUND_METABOLIC_PROCESS	NA	NA	NA	NA	NA	NA	NA	NA	NA	NA	NA	NA	NA	NA	0.170142	0.0152822	0.868909	0.0290568	NA	NA	NA	NA	NA	NA	0.012171	0.694002	NA	NA	NA	NA	NA	NA	0.730899	0.0405365	NA	NA	NA	NA	NA	NA	0.0147879	0.311226	0.0188359	0.405345	NA	NA	0.380493	0.0473937	0.625274
GO_GLYCOSYLATION	NA	NA	NA	NA	0.828475	0.0142326	NA	NA	NA	NA	NA	NA	0.0361251	0.920245	NA	NA	NA	NA	NA	NA	NA	NA	NA	NA	0.0006016	0.695988	NA	NA	NA	NA	NA	NA	NA	NA	NA	NA	NA	NA	NA	NA	NA	NA	NA	NA	NA	NA	0.0160021	0.215151	NA
GO_GLYCOSYLCERAMIDE_METABOLIC_PROCESS	NA	NA	NA	NA	NA	NA	NA	0.0306276	0.0398538	NA	NA	NA	NA	NA	NA	NA	NA	NA	NA	NA	NA	NA	NA	NA	NA	NA	NA	NA	NA	NA	NA	NA	NA	NA	NA	NA	NA	NA	NA	NA	0.00247109	NA	NA	NA	NA	0.0235986	NA	NA	NA
GO_GMP_METABOLIC_PROCESS	NA	NA	NA	NA	0.0118748	0.183063	NA	NA	NA	NA	NA	NA	NA	NA	0.210263	0.0104503	NA	0.025371	NA	NA	NA	NA	NA	NA	NA	NA	NA	NA	NA	NA	NA	NA	NA	NA	NA	NA	0.00713845	0.120262	NA	NA	0.018964	NA	NA	NA	NA	NA	NA	NA	NA
GO_GOLGI_ASSOCIATED_VESICLE	NA	NA	NA	NA	NA	NA	NA	NA	NA	NA	NA	NA	NA	NA	NA	NA	NA	NA	NA	NA	NA	NA	NA	NA	NA	NA	NA	NA	0.028771	0.518978	NA	NA	NA	NA	NA	NA	NA	NA	NA	NA	NA	NA	NA	NA	0.63484	0.0348787	NA	NA	NA
GO_GOLGI_ASSOCIATED_VESICLE_MEMBRANE	NA	NA	NA	NA	NA	NA	NA	NA	NA	NA	NA	NA	NA	NA	NA	NA	NA	NA	NA	NA	NA	NA	NA	NA	NA	NA	NA	NA	NA	NA	NA	NA	NA	NA	NA	NA	NA	NA	NA	NA	NA	NA	NA	NA	0.73789	0.0172436	NA	NA	NA
GO_GOLGI_MEDIAL_CISTERNA	NA	NA	NA	NA	NA	NA	NA	NA	NA	NA	NA	NA	0.0249441	0.145762	NA	NA	NA	NA	NA	NA	NA	NA	NA	NA	0.014862	NA	NA	NA	NA	NA	NA	NA	NA	NA	NA	NA	NA	NA	NA	NA	NA	NA	NA	0.00490143	NA	NA	NA	NA	NA
GO_GOLGI_ORGANIZATION	0.00178876	NA	NA	NA	NA	NA	0.0356053	0.410409	NA	NA	0.00678429	0.164916	0.0879437	0.0315255	0.0415539	0.81947	NA	NA	NA	NA	NA	NA	NA	NA	NA	NA	NA	NA	NA	NA	NA	NA	NA	NA	0.196017	0.0437429	0.0130433	NA	NA	NA	NA	NA	NA	NA	NA	NA	0.118142	0.00844946	NA
GO_GOLGI_RIBBON_FORMATION	NA	NA	NA	NA	NA	NA	NA	NA	0.221824	0.0174307	NA	NA	NA	NA	NA	NA	NA	NA	NA	NA	NA	NA	0.00539174	NA	0.0285789	NA	NA	NA	0.00135409	NA	NA	NA	NA	NA	NA	NA	NA	NA	NA	NA	NA	NA	NA	NA	0.0115834	0.171576	NA	NA	NA
GO_GOLGI_STACK	NA	NA	NA	NA	NA	NA	NA	NA	NA	NA	NA	NA	NA	NA	NA	NA	NA	NA	NA	NA	NA	NA	NA	NA	0.0264379	0.400678	NA	NA	NA	NA	NA	NA	NA	NA	NA	NA	NA	NA	NA	NA	NA	NA	NA	NA	NA	NA	0.0154247	0.198411	NA
GO_GOLGI_TO_ENDOSOME_TRANSPORT	NA	NA	NA	NA	NA	0.00170694	NA	NA	NA	NA	NA	NA	0.35214	0.0283615	NA	NA	NA	NA	NA	NA	NA	NA	NA	NA	NA	NA	NA	NA	NA	NA	NA	NA	NA	NA	NA	NA	NA	NA	NA	NA	NA	NA	NA	NA	NA	NA	NA	NA	NA
GO_GOLGI_TO_PLASMA_MEMBRANE_PROTEIN_TRANSPORT	NA	NA	NA	NA	NA	NA	0.026306	0.125636	NA	NA	NA	NA	0.0177918	0.129094	0.0289863	0.0741316	0.128401	0.0347684	0.176586	0.0459292	NA	NA	NA	NA	NA	NA	NA	NA	0.0269628	0.319658	0.0113425	0.330951	NA	NA	NA	NA	NA	NA	NA	NA	NA	NA	NA	NA	0.0117522	0.416183	NA	NA	NA
GO_GOLGI_TO_PLASMA_MEMBRANE_TRANSPORT	NA	NA	NA	NA	NA	NA	NA	NA	NA	NA	NA	NA	NA	NA	0.0789759	0.0299212	NA	NA	NA	NA	NA	NA	NA	NA	NA	NA	NA	NA	NA	NA	0.0331688	0.120767	NA	NA	0.0227343	0.410114	NA	NA	NA	NA	NA	NA	NA	NA	0.0342908	0.554105	NA	NA	NA
GO_GOLGI_TO_VACUOLE_TRANSPORT	NA	NA	NA	NA	NA	NA	NA	NA	NA	NA	NA	0.000482946	0.000730296	NA	NA	NA	NA	NA	NA	NA	NA	NA	NA	NA	NA	NA	NA	NA	NA	NA	NA	NA	NA	NA	NA	NA	NA	NA	NA	NA	NA	NA	0.0169128	NA	NA	NA	NA	NA	NA
GO_GOLGI_VESICLE_BUDDING	NA	NA	NA	NA	0.624819	0.0290954	0.0417166	0.715537	NA	NA	NA	NA	NA	NA	NA	NA	NA	NA	NA	NA	NA	NA	NA	NA	0.019618	0.524136	0.013955	NA	0.0102875	NA	NA	NA	NA	NA	NA	NA	NA	NA	NA	NA	NA	NA	NA	NA	0.249339	0.0231898	0.00266656	0.349812	NA
GO_GOLGI_VESICLE_TRANSPORT	0.0396056	0.877164	NA	NA	0.293937	0.0439821	0.00114428	0.219179	NA	NA	0.0571383	0.00826758	NA	NA	NA	NA	0.229534	0.00800072	NA	NA	NA	NA	NA	NA	0.00243002	0.665321	NA	NA	0.00125876	0.15033	NA	NA	0.523506	0.0346125	0.00481078	0.230179	NA	NA	NA	NA	NA	NA	0.157204	0.0499429	0.157204	0.0121331	0.00536646	0.675631	NA
GO_GPI_ANCHOR_METABOLIC_PROCESS	NA	NA	0.342733	0.00820379	0.00714572	0.0808625	NA	NA	NA	NA	NA	NA	NA	NA	NA	NA	0.0144556	0.450328	0.470065	0.0280812	NA	NA	NA	NA	0.00348889	NA	NA	NA	NA	NA	NA	NA	0.00441751	0.282158	NA	NA	0.0369588	NA	NA	NA	NA	NA	0.325451	0.0489419	NA	NA	NA	NA	NA
GO_GRANULOCYTE_CHEMOTAXIS	NA	NA	NA	NA	NA	NA	NA	NA	NA	NA	NA	NA	NA	NA	NA	NA	NA	NA	NA	NA	NA	NA	NA	NA	NA	NA	NA	NA	NA	0.033047	NA	NA	NA	NA	NA	NA	NA	NA	NA	NA	NA	NA	NA	NA	NA	NA	NA	NA	NA
GO_GRANULOCYTE_DIFFERENTIATION	NA	NA	NA	NA	NA	NA	NA	NA	NA	NA	NA	NA	NA	NA	NA	NA	NA	NA	NA	NA	NA	NA	NA	NA	NA	NA	NA	NA	NA	NA	NA	NA	NA	NA	NA	NA	NA	NA	NA	NA	NA	NA	NA	NA	NA	NA	NA	NA	NA
GO_GRANULOCYTE_MIGRATION	NA	NA	NA	NA	0.536143	0.0206058	NA	NA	NA	NA	NA	NA	NA	NA	NA	NA	NA	NA	NA	NA	NA	NA	NA	NA	NA	NA	NA	NA	NA	0.0144094	NA	NA	NA	NA	NA	NA	NA	NA	NA	NA	NA	NA	NA	NA	NA	NA	NA	NA	NA
GO_GROOMING_BEHAVIOR	NA	NA	NA	NA	NA	NA	NA	NA	0.288529	0.0312175	NA	NA	NA	NA	NA	NA	NA	NA	NA	NA	NA	NA	NA	NA	NA	NA	NA	NA	NA	NA	NA	NA	NA	NA	NA	NA	NA	NA	NA	NA	NA	NA	NA	NA	NA	NA	NA	NA	NA
GO_GROWTH_FACTOR_BINDING	NA	NA	NA	NA	NA	NA	NA	NA	NA	NA	NA	NA	NA	NA	NA	NA	NA	NA	NA	NA	NA	NA	NA	NA	NA	NA	NA	NA	NA	NA	NA	NA	0.0491255	0.394725	NA	NA	NA	NA	NA	NA	NA	NA	NA	NA	NA	NA	NA	NA	NA
GO_GROWTH_FACTOR_RECEPTOR_BINDING	NA	NA	NA	NA	NA	NA	NA	NA	NA	NA	NA	NA	NA	NA	NA	NA	0.647851	0.0420286	NA	NA	NA	NA	NA	NA	NA	NA	NA	NA	NA	NA	NA	NA	NA	NA	NA	NA	0.00991146	NA	NA	NA	NA	NA	NA	NA	NA	NA	NA	NA	NA
GO_GROWTH_HORMONE_SECRETION	NA	NA	NA	NA	NA	NA	NA	NA	NA	NA	NA	NA	NA	NA	NA	NA	NA	NA	0.0363924	NA	NA	NA	NA	NA	NA	NA	NA	NA	NA	NA	NA	NA	NA	NA	NA	NA	NA	NA	NA	NA	NA	NA	NA	NA	NA	NA	NA	NA	NA
GO_GROWTH_PLATE_CARTILAGE_DEVELOPMENT	NA	NA	NA	NA	NA	NA	NA	NA	NA	NA	NA	NA	NA	NA	NA	NA	NA	NA	NA	NA	NA	NA	0.00987112	0.129948	NA	NA	NA	NA	NA	NA	NA	NA	NA	NA	0.17534	0.011791	NA	NA	NA	NA	NA	NA	NA	NA	NA	NA	NA	NA	NA
GO_GTP_BIOSYNTHETIC_PROCESS	NA	NA	NA	NA	NA	NA	NA	NA	NA	NA	NA	NA	NA	NA	NA	0.00645748	0.158632	0.000850855	NA	0.0196172	NA	NA	NA	NA	0.0179369	NA	NA	NA	NA	NA	NA	NA	NA	NA	NA	NA	NA	NA	NA	NA	NA	NA	NA	NA	NA	NA	NA	NA	NA
GO_GTP_DEPENDENT_PROTEIN_BINDING	NA	NA	NA	NA	NA	NA	NA	NA	NA	NA	NA	NA	NA	NA	NA	NA	0.0493446	0.340966	NA	NA	NA	NA	NA	NA	NA	NA	NA	NA	NA	NA	0.0293163	NA	NA	NA	NA	NA	NA	NA	NA	NA	NA	NA	0.030037	NA	NA	NA	NA	NA	NA
GO_GTP_METABOLIC_PROCESS	NA	NA	NA	NA	0.0359154	NA	NA	NA	NA	NA	NA	NA	NA	NA	NA	0.0317828	0.32477	0.00984962	NA	NA	NA	NA	NA	NA	NA	NA	NA	NA	0.336219	0.023668	NA	NA	0.224078	0.00191843	NA	NA	NA	NA	NA	NA	NA	NA	NA	NA	NA	NA	NA	NA	NA
GO_GTP_RHO_BINDING	NA	NA	NA	NA	NA	NA	NA	NA	NA	NA	NA	NA	NA	NA	NA	0.0250148	NA	NA	NA	NA	NA	NA	NA	NA	NA	NA	NA	NA	NA	NA	NA	NA	NA	NA	NA	NA	NA	NA	NA	NA	NA	NA	NA	NA	NA	NA	NA	NA	NA
GO_GTPASE_ACTIVATING_PROTEIN_BINDING	NA	NA	NA	NA	NA	NA	NA	NA	NA	NA	NA	NA	NA	NA	NA	NA	NA	NA	NA	NA	NA	NA	NA	NA	NA	NA	NA	NA	NA	NA	NA	NA	NA	NA	NA	NA	NA	NA	NA	NA	NA	NA	NA	NA	NA	NA	NA	NA	NA
GO_GTPASE_ACTIVITY	NA	NA	NA	NA	NA	NA	NA	NA	NA	NA	NA	NA	NA	NA	NA	NA	NA	NA	NA	NA	NA	NA	NA	NA	NA	NA	NA	NA	NA	NA	NA	NA	0.641989	0.0457425	NA	NA	NA	NA	NA	NA	NA	NA	NA	NA	NA	NA	NA	NA	NA
GO_GTPASE_INHIBITOR_ACTIVITY	NA	NA	NA	NA	NA	NA	NA	NA	NA	NA	NA	NA	NA	NA	NA	NA	0.019447	0.224118	NA	NA	NA	NA	NA	NA	NA	NA	NA	NA	NA	NA	NA	NA	NA	NA	NA	NA	NA	NA	NA	NA	NA	NA	NA	NA	NA	NA	NA	NA	NA
GO_GTPASE_REGULATOR_ACTIVITY	NA	NA	0.00183465	0.344125	0.0766757	0.0329226	NA	NA	0.0963146	0.0376567	NA	NA	NA	NA	NA	NA	NA	NA	NA	NA	0.0125997	0.616913	NA	NA	NA	NA	NA	NA	NA	NA	NA	NA	NA	NA	NA	NA	0.0643078	0.0222882	NA	NA	NA	NA	0.297524	0.0481703	NA	NA	NA	NA	NA
GO_GUANOSINE_CONTAINING_COMPOUND_BIOSYNTHETIC_PROCESS	NA	NA	NA	NA	0.0118748	0.183063	NA	NA	NA	NA	NA	NA	0.300543	0.0195686	NA	0.0104503	0.197361	0.00180342	NA	0.031199	NA	NA	NA	NA	0.0285789	NA	NA	NA	NA	NA	NA	NA	NA	NA	NA	NA	NA	NA	NA	NA	NA	NA	NA	NA	NA	NA	NA	NA	NA
GO_GUANOSINE_CONTAINING_COMPOUND_METABOLIC_PROCESS	NA	NA	NA	NA	0.00119723	0.430855	NA	NA	NA	NA	NA	NA	NA	NA	0.48212	0.00947898	0.45819	0.00512051	0.16977	0.00755981	NA	NA	NA	NA	NA	NA	NA	NA	NA	NA	NA	NA	0.326941	0.00688194	NA	NA	NA	NA	NA	NA	NA	NA	NA	NA	NA	NA	NA	NA	NA
GO_GUANYL_NUCLEOTIDE_BINDING	NA	NA	NA	NA	NA	NA	NA	NA	NA	NA	NA	NA	NA	NA	NA	NA	NA	NA	NA	NA	NA	NA	NA	NA	NA	NA	NA	NA	NA	NA	NA	NA	0.76728	0.0185916	NA	NA	NA	NA	NA	NA	NA	NA	NA	NA	NA	NA	NA	NA	NA
GO_GUANYL_NUCLEOTIDE_EXCHANGE_FACTOR_ACTIVITY	NA	NA	NA	NA	0.926561	0.0125933	0.0596519	0.048876	0.0385684	0.614795	NA	NA	NA	NA	NA	NA	0.653838	0.0159702	NA	NA	NA	NA	NA	NA	NA	NA	NA	NA	0.00280533	0.612408	NA	NA	NA	NA	NA	NA	NA	NA	NA	NA	NA	NA	NA	NA	NA	NA	NA	NA	NA
GO_H4_H2A_HISTONE_ACETYLTRANSFERASE_COMPLEX	NA	NA	0.00223498	NA	NA	NA	NA	NA	NA	NA	NA	NA	NA	NA	NA	NA	0.0417943	NA	NA	NA	NA	NA	NA	NA	NA	0.0154594	0.0237004	NA	0.291212	0.0169859	NA	NA	NA	NA	NA	NA	NA	NA	NA	NA	NA	NA	NA	NA	NA	NA	NA	0.0400507	NA
GO_H4_HISTONE_ACETYLTRANSFERASE_ACTIVITY	NA	NA	0.0190586	NA	NA	NA	NA	NA	0.0358379	0.222593	NA	NA	NA	NA	NA	NA	NA	NA	NA	NA	NA	NA	NA	NA	NA	NA	NA	NA	NA	NA	NA	NA	NA	NA	NA	NA	0.0104771	NA	NA	NA	NA	NA	NA	NA	NA	NA	NA	NA	NA
GO_H4_HISTONE_ACETYLTRANSFERASE_COMPLEX	NA	NA	0.00027675	0.442998	NA	NA	NA	NA	0.0480418	0.49431	NA	NA	NA	NA	NA	NA	NA	NA	NA	NA	NA	NA	NA	NA	NA	NA	NA	NA	0.171587	0.00968872	NA	NA	NA	NA	NA	NA	0.00872453	NA	NA	NA	NA	NA	NA	NA	0.103133	0.0234179	0.186092	0.00518408	0.294788
GO_HAIR_CELL_DIFFERENTIATION	NA	NA	NA	NA	NA	NA	NA	NA	NA	NA	NA	NA	0.00530446	NA	NA	NA	NA	NA	NA	NA	NA	NA	NA	NA	NA	NA	NA	NA	NA	NA	NA	NA	NA	NA	NA	NA	NA	NA	NA	NA	NA	NA	NA	NA	0.0161675	NA	NA	NA	NA
GO_HAIR_FOLLICLE_MATURATION	NA	NA	NA	NA	NA	NA	NA	NA	NA	NA	NA	NA	0.00697496	NA	NA	NA	NA	NA	0.0363924	NA	NA	NA	NA	NA	NA	NA	NA	NA	NA	NA	NA	NA	NA	NA	NA	NA	NA	NA	NA	NA	NA	NA	NA	NA	NA	NA	NA	0.00168516	NA
GO_HEAD_MORPHOGENESIS	NA	NA	NA	NA	NA	NA	NA	NA	NA	NA	NA	NA	NA	NA	NA	NA	NA	NA	NA	NA	NA	NA	NA	NA	NA	NA	NA	NA	NA	NA	NA	NA	NA	NA	NA	NA	NA	NA	NA	0.0160431	NA	NA	NA	NA	NA	NA	NA	NA	NA
GO_HEART_FIELD_SPECIFICATION	NA	NA	NA	NA	NA	NA	NA	NA	0.0358379	NA	NA	NA	NA	NA	NA	NA	NA	NA	NA	NA	NA	NA	NA	NA	NA	NA	NA	NA	NA	NA	NA	NA	NA	NA	NA	NA	NA	NA	NA	NA	NA	NA	NA	NA	NA	NA	NA	NA	NA
GO_HEART_FORMATION	NA	NA	NA	NA	NA	NA	NA	NA	0.0172537	NA	NA	NA	NA	NA	NA	NA	NA	NA	NA	NA	NA	NA	NA	NA	NA	NA	NA	NA	NA	NA	NA	NA	NA	NA	NA	NA	NA	NA	NA	NA	NA	NA	NA	NA	NA	NA	NA	NA	NA
GO_HEART_GROWTH	NA	NA	0.0153903	NA	NA	NA	NA	NA	NA	NA	NA	NA	NA	NA	NA	NA	NA	NA	NA	NA	NA	NA	NA	NA	NA	NA	NA	NA	NA	NA	NA	NA	NA	NA	NA	NA	NA	NA	NA	NA	NA	NA	NA	NA	NA	NA	NA	NA	NA
GO_HEART_MORPHOGENESIS	NA	NA	NA	NA	NA	NA	NA	NA	NA	NA	0.944554	0.0333079	NA	NA	NA	NA	NA	NA	NA	NA	NA	NA	NA	NA	NA	NA	NA	NA	NA	NA	0.185521	0.0453037	NA	NA	NA	NA	0.00275328	NA	NA	NA	NA	NA	NA	NA	NA	NA	NA	NA	0.0137486
GO_HEART_PROCESS	NA	NA	NA	NA	NA	NA	NA	NA	NA	NA	NA	NA	0.47453	0.0188389	NA	NA	NA	NA	NA	NA	NA	NA	NA	NA	NA	NA	NA	NA	NA	NA	NA	NA	NA	NA	NA	NA	0.0203875	0.935327	NA	NA	NA	NA	NA	NA	NA	NA	NA	NA	0.0254753
GO_HEART_TRABECULA_FORMATION	NA	NA	NA	NA	NA	NA	NA	NA	NA	NA	NA	NA	NA	NA	NA	NA	NA	NA	NA	NA	NA	NA	NA	NA	NA	NA	NA	NA	NA	NA	NA	0.000408444	NA	NA	NA	NA	NA	NA	NA	NA	NA	NA	NA	NA	NA	NA	NA	NA	NA
GO_HEART_TRABECULA_MORPHOGENESIS	NA	NA	NA	NA	NA	NA	NA	NA	NA	NA	NA	NA	NA	NA	NA	NA	NA	NA	NA	NA	NA	NA	NA	NA	NA	NA	NA	NA	NA	NA	NA	0.00467335	NA	NA	NA	NA	NA	NA	NA	NA	NA	NA	NA	NA	NA	NA	NA	NA	NA
GO_HEART_VALVE_DEVELOPMENT	NA	NA	NA	NA	NA	NA	NA	NA	NA	NA	NA	NA	NA	NA	NA	NA	NA	NA	NA	NA	NA	NA	NA	NA	NA	NA	NA	NA	NA	NA	NA	NA	NA	NA	NA	NA	0.0187162	NA	NA	NA	NA	NA	NA	NA	NA	NA	NA	NA	NA
GO_HEAT_SHOCK_PROTEIN_BINDING	NA	NA	0.478075	0.0226091	NA	NA	0.608873	0.0464758	NA	NA	NA	0.0305475	NA	NA	NA	NA	NA	NA	NA	NA	0.03527	0.579653	NA	NA	NA	NA	NA	0.0327436	NA	NA	NA	NA	NA	NA	NA	NA	NA	NA	NA	NA	NA	NA	NA	NA	NA	NA	NA	NA	0.619508
GO_HELICASE_ACTIVITY	NA	NA	0.602295	0.0161583	NA	NA	0.73151	0.000844181	0.0243322	0.209601	NA	NA	0.020318	0.716476	NA	NA	NA	NA	0.0338016	0.834479	0.0271524	NA	0.365094	0.0298345	0.0876241	0.0034999	NA	NA	0.00471332	NA	NA	NA	NA	NA	NA	NA	NA	NA	0.0409787	0.579776	NA	NA	0.0420432	0.515711	NA	NA	0.00178903	0.70253	NA
GO_HEMATOPOIETIC_PROGENITOR_CELL_DIFFERENTIATION	NA	NA	NA	NA	NA	NA	NA	NA	NA	NA	NA	NA	0.030558	0.505487	0.00848246	0.577734	NA	NA	NA	NA	NA	NA	NA	NA	NA	NA	NA	NA	NA	NA	NA	NA	NA	NA	NA	NA	NA	NA	NA	NA	NA	NA	NA	NA	NA	NA	NA	NA	NA
GO_HEMATOPOIETIC_STEM_CELL_DIFFERENTIATION	NA	NA	NA	NA	NA	NA	0.756994	0.0451475	NA	NA	NA	NA	NA	NA	0.0153336	0.626431	NA	NA	NA	NA	NA	NA	NA	NA	NA	NA	NA	NA	NA	NA	NA	NA	NA	NA	NA	NA	NA	NA	NA	NA	NA	NA	0.00375932	NA	NA	NA	NA	NA	NA
GO_HEMATOPOIETIC_STEM_CELL_PROLIFERATION	NA	NA	0.281497	0.042297	NA	NA	NA	NA	NA	NA	NA	NA	NA	NA	NA	NA	NA	NA	NA	NA	NA	NA	NA	NA	NA	NA	NA	NA	NA	NA	NA	NA	NA	NA	NA	NA	NA	NA	NA	NA	NA	NA	NA	NA	NA	NA	NA	NA	NA
GO_HEME_METABOLIC_PROCESS	NA	NA	NA	NA	NA	NA	NA	NA	NA	NA	NA	NA	NA	NA	0.0160382	0.303475	NA	NA	NA	NA	NA	NA	NA	NA	0.022908	0.253983	NA	NA	0.0148788	0.265131	NA	NA	NA	NA	NA	NA	NA	NA	NA	NA	NA	NA	NA	NA	NA	NA	NA	NA	NA
GO_HEMIDESMOSOME_ASSEMBLY	NA	NA	NA	NA	NA	NA	NA	NA	NA	NA	NA	NA	NA	NA	NA	NA	NA	NA	NA	NA	NA	NA	NA	NA	NA	NA	NA	NA	NA	NA	NA	NA	NA	NA	NA	NA	NA	NA	NA	NA	NA	NA	NA	NA	NA	NA	NA	0.000692561	NA
GO_HEMOGLOBIN_METABOLIC_PROCESS	NA	NA	NA	NA	NA	NA	NA	NA	NA	NA	NA	NA	NA	NA	NA	NA	NA	NA	NA	NA	NA	NA	NA	NA	NA	NA	NA	NA	NA	NA	NA	NA	NA	NA	NA	NA	NA	NA	NA	NA	NA	NA	NA	NA	NA	NA	NA	NA	NA
GO_HEPARAN_SULFATE_PROTEOGLYCAN_BINDING	NA	NA	NA	NA	NA	NA	NA	NA	NA	NA	NA	NA	NA	NA	NA	NA	NA	NA	NA	NA	NA	NA	NA	NA	NA	NA	NA	NA	NA	NA	NA	NA	NA	NA	NA	NA	NA	NA	NA	NA	NA	NA	NA	NA	NA	NA	NA	NA	NA
GO_HEPARAN_SULFATE_PROTEOGLYCAN_BIOSYNTHETIC_PROCESS	NA	NA	NA	NA	NA	NA	NA	NA	NA	NA	NA	NA	NA	NA	NA	NA	NA	NA	NA	NA	NA	NA	NA	NA	NA	NA	NA	NA	NA	NA	NA	NA	NA	NA	NA	NA	NA	NA	NA	NA	NA	NA	NA	NA	NA	NA	NA	NA	NA
GO_HEPARAN_SULFATE_PROTEOGLYCAN_METABOLIC_PROCESS	NA	NA	NA	NA	NA	NA	NA	NA	NA	NA	NA	NA	NA	NA	NA	NA	NA	NA	NA	NA	NA	NA	NA	NA	NA	NA	NA	NA	NA	NA	NA	NA	NA	NA	NA	NA	NA	NA	NA	NA	NA	NA	NA	NA	NA	NA	NA	NA	NA
GO_HEPARIN_BINDING	NA	0.0145146	NA	NA	0.871282	0.0352078	NA	NA	NA	NA	NA	NA	NA	NA	NA	NA	NA	NA	NA	NA	0.03417	NA	0.390657	0.0354181	NA	NA	0.129036	0.00551338	NA	NA	NA	NA	NA	NA	NA	NA	0.204459	0.00456998	NA	NA	NA	NA	NA	NA	NA	NA	NA	NA	0.00925349
GO_HEPATICOBILIARY_SYSTEM_DEVELOPMENT	NA	NA	NA	NA	NA	NA	NA	NA	NA	NA	NA	NA	NA	NA	NA	NA	0.896587	0.01538	NA	NA	NA	NA	NA	NA	NA	NA	0.227902	0.0120542	NA	NA	NA	NA	NA	NA	0.178254	0.0378096	NA	NA	NA	NA	0.00175679	0.890107	NA	NA	NA	NA	NA	NA	NA
GO_HEPATOCYTE_APOPTOTIC_PROCESS	NA	NA	NA	NA	NA	NA	NA	NA	NA	NA	NA	NA	0.0353922	0.172267	NA	NA	NA	NA	NA	NA	NA	NA	NA	NA	NA	NA	NA	NA	0.000838374	NA	NA	NA	NA	NA	NA	NA	NA	NA	NA	NA	NA	NA	NA	NA	NA	NA	NA	NA	NA
GO_HEPATOCYTE_DIFFERENTIATION	NA	NA	NA	NA	NA	NA	NA	NA	NA	NA	NA	NA	NA	NA	NA	NA	NA	NA	NA	NA	NA	NA	NA	NA	NA	NA	NA	NA	NA	NA	NA	NA	NA	NA	NA	NA	NA	NA	NA	NA	0.0216622	NA	NA	NA	NA	NA	NA	NA	NA
GO_HEPATOCYTE_GROWTH_FACTOR_RECEPTOR_SIGNALING_PATHWAY	NA	NA	NA	NA	NA	NA	NA	NA	NA	NA	NA	NA	NA	NA	NA	NA	NA	NA	NA	NA	NA	NA	NA	NA	NA	NA	NA	NA	NA	NA	NA	NA	NA	NA	NA	NA	NA	NA	NA	NA	0.0245089	NA	NA	NA	NA	NA	NA	NA	NA
GO_HETEROCHROMATIN	NA	NA	NA	0.0170795	NA	NA	NA	NA	NA	NA	NA	NA	NA	NA	NA	NA	NA	NA	NA	NA	NA	NA	NA	NA	NA	NA	NA	NA	NA	NA	NA	NA	NA	NA	NA	NA	NA	NA	NA	NA	NA	NA	NA	NA	NA	NA	NA	NA	NA
GO_HETEROCHROMATIN_ORGANIZATION	NA	NA	NA	NA	NA	NA	NA	NA	NA	NA	NA	NA	0.602359	0.0366683	NA	NA	NA	NA	NA	NA	NA	NA	NA	NA	NA	NA	NA	NA	NA	NA	0.240355	0.0460495	NA	NA	NA	NA	NA	NA	NA	NA	NA	NA	NA	NA	NA	NA	NA	NA	NA
GO_HETEROTYPIC_CELL_CELL_ADHESION	NA	NA	0.0436251	0.184411	NA	NA	NA	NA	NA	NA	NA	NA	NA	NA	NA	NA	0.0158697	NA	NA	NA	NA	NA	NA	NA	NA	NA	NA	NA	NA	NA	0.163827	0.024113	NA	NA	0.129557	0.0170473	NA	NA	NA	NA	0.0151811	0.612769	NA	NA	0.167228	0.00944923	NA	NA	NA
GO_HEXOSE_CATABOLIC_PROCESS	NA	NA	0.509626	0.0337631	NA	NA	NA	NA	NA	NA	NA	NA	NA	NA	NA	NA	NA	NA	NA	NA	NA	NA	NA	NA	NA	NA	NA	NA	NA	NA	NA	NA	NA	NA	NA	NA	NA	NA	NA	0.036593	NA	NA	NA	NA	NA	NA	NA	NA	NA
GO_HEXOSE_TRANSMEMBRANE_TRANSPORTER_ACTIVITY	NA	NA	NA	NA	NA	NA	NA	NA	NA	NA	NA	NA	NA	NA	NA	NA	NA	NA	NA	NA	NA	NA	NA	NA	NA	NA	NA	NA	NA	NA	NA	NA	NA	NA	NA	NA	NA	NA	NA	NA	NA	NA	NA	NA	NA	NA	NA	NA	NA
GO_HIGH_DENSITY_LIPOPROTEIN_PARTICLE_ASSEMBLY	NA	NA	NA	NA	NA	NA	NA	NA	NA	NA	NA	NA	NA	NA	NA	NA	NA	NA	NA	0.0400757	NA	NA	NA	NA	NA	NA	NA	NA	NA	NA	NA	NA	NA	NA	NA	NA	NA	NA	NA	NA	NA	NA	NA	NA	NA	NA	0.0299597	NA	NA
GO_HIGH_DENSITY_LIPOPROTEIN_PARTICLE_BINDING	NA	NA	NA	NA	NA	NA	NA	NA	NA	NA	NA	NA	NA	NA	NA	NA	NA	NA	NA	NA	NA	NA	NA	NA	0.0367543	NA	NA	NA	NA	NA	NA	NA	NA	NA	NA	NA	NA	NA	NA	NA	NA	NA	NA	NA	NA	NA	NA	NA	NA
GO_HIGH_DENSITY_LIPOPROTEIN_PARTICLE_REMODELING	NA	NA	NA	NA	NA	NA	NA	NA	NA	NA	NA	NA	NA	NA	NA	NA	NA	NA	NA	0.0497773	NA	NA	NA	NA	NA	NA	NA	NA	NA	NA	NA	NA	NA	0.0136668	NA	NA	NA	NA	NA	NA	NA	0.0298721	NA	NA	NA	NA	NA	NA	NA
GO_HIGH_VOLTAGE_GATED_CALCIUM_CHANNEL_ACTIVITY	NA	NA	NA	NA	NA	NA	0.0106672	NA	NA	NA	NA	NA	NA	NA	NA	NA	NA	NA	NA	NA	NA	NA	NA	NA	NA	NA	NA	NA	NA	NA	NA	NA	NA	NA	NA	NA	NA	NA	NA	NA	NA	NA	NA	NA	NA	NA	NA	NA	NA
GO_HINDBRAIN_MORPHOGENESIS	NA	NA	NA	NA	NA	NA	NA	NA	NA	NA	NA	NA	NA	0.0312448	NA	NA	NA	NA	NA	NA	NA	NA	NA	NA	NA	NA	NA	NA	NA	NA	NA	NA	NA	NA	NA	NA	NA	NA	NA	NA	NA	NA	NA	NA	NA	NA	NA	NA	NA
GO_HINDBRAIN_RADIAL_GLIA_GUIDED_CELL_MIGRATION	NA	NA	NA	NA	NA	NA	NA	NA	0.012865	NA	NA	NA	NA	NA	NA	NA	NA	NA	NA	NA	NA	NA	NA	NA	NA	NA	NA	NA	NA	NA	NA	NA	NA	NA	NA	NA	NA	NA	NA	NA	NA	NA	NA	NA	NA	NA	NA	NA	NA
GO_HIPPO_SIGNALING	NA	NA	NA	NA	NA	NA	NA	NA	NA	NA	NA	NA	NA	NA	NA	NA	NA	NA	NA	NA	NA	NA	NA	NA	NA	NA	NA	NA	NA	NA	NA	NA	NA	NA	NA	NA	NA	NA	NA	NA	NA	NA	NA	NA	0.01522	0.116703	NA	NA	NA
GO_HIPPOCAMPAL_MOSSY_FIBER_TO_CA3_SYNAPSE	NA	NA	NA	NA	NA	NA	NA	NA	NA	NA	NA	NA	NA	NA	NA	NA	NA	NA	NA	0.0303526	NA	NA	NA	NA	NA	NA	NA	NA	NA	NA	NA	NA	NA	NA	NA	NA	NA	NA	NA	NA	NA	NA	NA	NA	NA	NA	NA	NA	NA
GO_HIPPOCAMPUS_DEVELOPMENT	NA	NA	NA	NA	NA	NA	NA	NA	NA	NA	NA	NA	NA	NA	NA	NA	NA	NA	NA	NA	NA	NA	NA	NA	NA	NA	NA	NA	NA	NA	NA	NA	NA	NA	NA	NA	NA	NA	NA	NA	NA	NA	NA	NA	0.0157065	0.294402	NA	NA	NA
GO_HISTONE_ACETYLTRANSFERASE_ACTIVITY_H4_K16_SPECIFIC	NA	NA	0.00668292	NA	NA	NA	NA	NA	0.012865	0.137642	NA	NA	NA	NA	NA	NA	NA	NA	NA	NA	NA	NA	NA	NA	NA	NA	NA	NA	NA	NA	NA	NA	NA	NA	NA	NA	0.00361645	NA	NA	NA	NA	NA	NA	NA	NA	NA	NA	NA	NA
GO_HISTONE_ACETYLTRANSFERASE_BINDING	NA	NA	NA	NA	NA	NA	NA	NA	NA	NA	NA	NA	NA	NA	NA	NA	NA	NA	NA	NA	0.0071781	NA	NA	NA	NA	NA	NA	NA	NA	NA	NA	NA	NA	NA	NA	NA	NA	NA	NA	NA	NA	NA	NA	NA	NA	NA	NA	NA	NA
GO_HISTONE_ARGININE_METHYLATION	NA	NA	NA	NA	NA	NA	NA	NA	NA	0.0108448	NA	NA	NA	NA	NA	NA	NA	0.0158864	NA	NA	NA	NA	0.00331023	NA	NA	NA	NA	NA	NA	NA	NA	NA	NA	NA	NA	NA	NA	NA	NA	NA	NA	NA	NA	NA	NA	NA	NA	NA	NA
GO_HISTONE_BINDING	NA	NA	0.183453	0.00335545	NA	NA	NA	NA	0.0267465	0.0624954	NA	NA	NA	NA	0.0190394	0.130701	NA	NA	NA	NA	0.251819	0.0231513	NA	NA	0.173273	0.00155423	NA	NA	NA	NA	0.147445	0.000668615	NA	NA	NA	NA	NA	NA	NA	NA	NA	NA	NA	NA	0.02366	0.21347	0.115693	0.0109195	NA
GO_HISTONE_DEACETYLASE_ACTIVITY_H3_K14_SPECIFIC	NA	NA	NA	NA	0.000192584	NA	0.149796	0.00976468	NA	NA	NA	NA	NA	NA	NA	NA	NA	NA	NA	NA	NA	NA	NA	NA	NA	NA	NA	NA	NA	NA	NA	NA	NA	NA	NA	NA	NA	NA	NA	NA	NA	NA	NA	NA	0.112401	0.00744463	NA	NA	NA
GO_HISTONE_DEACETYLASE_BINDING	NA	NA	NA	NA	0.0499512	0.228258	0.282525	0.00201194	0.0167639	0.239279	NA	NA	NA	NA	NA	NA	NA	NA	NA	NA	NA	NA	NA	NA	0.892451	0.0210465	NA	NA	0.287382	0.0247219	NA	NA	NA	NA	NA	NA	NA	NA	NA	NA	0.00872415	0.522572	NA	NA	NA	NA	NA	NA	0.0113212
GO_HISTONE_DEACETYLASE_COMPLEX	NA	NA	NA	NA	NA	NA	0.127387	0.00665269	6.58328e-05	0.680901	NA	NA	NA	NA	0.727589	0.0110531	0.0321813	0.752898	NA	NA	NA	NA	NA	NA	0.774969	0.00536776	NA	NA	0.356669	0.00639028	NA	NA	NA	NA	NA	NA	NA	NA	NA	NA	0.0308567	0.692331	NA	NA	0.00221087	0.0839101	NA	NA	NA
GO_HISTONE_DEACETYLATION	NA	0.000970282	NA	NA	NA	NA	NA	NA	NA	NA	NA	NA	NA	NA	NA	NA	NA	NA	0.0174232	0.472888	0.00538499	0.416341	NA	NA	0.448356	0.0354866	NA	NA	0.137438	0.0401982	NA	NA	NA	NA	0.189653	0.00509702	0.0365073	0.515311	NA	NA	NA	NA	NA	NA	0.0144445	0.0890151	NA	NA	0.0220045
GO_HISTONE_DEMETHYLASE_ACTIVITY_H3_K36_SPECIFIC	NA	NA	NA	NA	NA	NA	NA	NA	NA	NA	NA	NA	NA	NA	NA	NA	NA	NA	NA	NA	NA	NA	NA	NA	NA	NA	NA	NA	NA	NA	NA	NA	NA	NA	NA	NA	NA	NA	NA	NA	NA	NA	0.00590936	0.102589	NA	NA	NA	NA	NA
GO_HISTONE_DEMETHYLASE_ACTIVITY_H3_K9_SPECIFIC	NA	NA	NA	NA	NA	NA	NA	NA	NA	NA	NA	NA	NA	NA	NA	NA	NA	NA	NA	NA	NA	NA	0.0988142	0.00391134	NA	NA	NA	NA	NA	NA	NA	NA	NA	NA	NA	NA	NA	NA	NA	NA	NA	NA	NA	NA	NA	NA	NA	NA	NA
GO_HISTONE_DEUBIQUITINATION	NA	NA	0.253543	0.00292125	NA	0.000295044	NA	NA	0.337762	0.00447367	NA	NA	NA	0.0496382	NA	NA	0.0493446	0.340966	NA	NA	NA	NA	NA	NA	0.00927903	0.189861	0.0281312	0.196649	NA	NA	NA	NA	NA	NA	NA	NA	NA	NA	NA	NA	0.00506771	0.296433	NA	NA	NA	NA	NA	0.0473079	NA
GO_HISTONE_EXCHANGE	NA	NA	NA	NA	NA	NA	NA	NA	0.0206566	NA	NA	NA	NA	NA	NA	NA	NA	NA	NA	NA	NA	NA	NA	NA	0.0263703	0.417608	NA	NA	NA	NA	NA	NA	NA	NA	NA	NA	NA	NA	NA	NA	NA	NA	NA	NA	NA	NA	NA	NA	NA
GO_HISTONE_H2A_ACETYLATION	NA	NA	0.00118606	NA	NA	NA	NA	NA	NA	NA	NA	NA	NA	NA	NA	NA	0.0281881	NA	NA	NA	NA	NA	NA	NA	NA	0.0102529	0.0158142	NA	0.243163	0.011279	NA	NA	NA	NA	NA	NA	NA	NA	NA	NA	NA	NA	NA	NA	NA	NA	NA	0.026987	NA
GO_HISTONE_H2A_MONOUBIQUITINATION	NA	NA	NA	NA	NA	NA	NA	NA	NA	NA	NA	NA	NA	NA	NA	NA	NA	NA	NA	NA	NA	NA	NA	NA	NA	NA	NA	NA	NA	NA	NA	NA	NA	NA	NA	NA	NA	NA	NA	NA	NA	NA	NA	NA	NA	NA	NA	NA	NA
GO_HISTONE_H2A_UBIQUITINATION	NA	NA	NA	NA	0.0386065	NA	NA	NA	NA	NA	NA	NA	NA	NA	NA	NA	NA	NA	NA	NA	NA	0.0133251	NA	NA	NA	NA	NA	NA	NA	NA	NA	NA	NA	NA	NA	NA	NA	NA	NA	NA	NA	NA	NA	NA	NA	NA	NA	NA	NA
GO_HISTONE_H3_ACETYLATION	NA	NA	NA	NA	NA	NA	NA	NA	NA	NA	NA	NA	NA	NA	NA	NA	NA	NA	NA	NA	NA	NA	0.381705	0.00960757	NA	NA	NA	NA	NA	NA	0.0331688	0.120767	NA	NA	NA	NA	NA	NA	NA	NA	NA	NA	NA	NA	0.00557586	0.190971	NA	NA	NA
GO_HISTONE_H3_DEACETYLATION	NA	NA	NA	NA	8.43103e-05	NA	NA	NA	NA	NA	NA	NA	NA	NA	NA	NA	0.0381988	NA	0.00613835	NA	NA	NA	NA	NA	NA	NA	NA	NA	0.0412453	NA	0.0225251	NA	NA	NA	0.18367	2.45145e-05	NA	NA	NA	NA	NA	NA	0.212217	0.0192852	NA	NA	NA	NA	NA
GO_HISTONE_H3_K27_METHYLATION	NA	NA	NA	NA	NA	NA	NA	NA	NA	NA	NA	NA	NA	NA	0.0474584	NA	NA	NA	NA	NA	0.0354666	0.133171	0.011997	NA	NA	NA	0.0237004	NA	NA	NA	NA	NA	NA	NA	0.0187548	0.168523	NA	NA	NA	NA	NA	NA	NA	NA	NA	NA	NA	NA	NA
GO_HISTONE_H3_K36_DEMETHYLATION	NA	NA	NA	NA	NA	NA	NA	NA	NA	NA	NA	NA	NA	NA	NA	NA	NA	NA	NA	NA	NA	NA	NA	NA	NA	NA	NA	NA	NA	NA	NA	NA	NA	NA	NA	NA	NA	NA	NA	NA	NA	NA	0.00590936	0.102589	NA	NA	NA	NA	NA
GO_HISTONE_H3_K36_METHYLATION	NA	NA	NA	NA	NA	NA	0.228707	0.0245089	NA	NA	NA	0.00940097	NA	NA	NA	NA	NA	NA	NA	NA	NA	NA	NA	NA	NA	NA	NA	NA	0.0271775	NA	NA	NA	0.0110763	0.148418	0.0110763	0.131157	NA	NA	NA	NA	NA	NA	NA	NA	0.000820565	NA	NA	NA	NA
GO_HISTONE_H3_K4_METHYLATION	NA	NA	NA	NA	NA	NA	NA	NA	NA	NA	NA	NA	NA	NA	NA	NA	NA	NA	NA	NA	0.0475295	NA	NA	NA	0.00463919	NA	NA	NA	NA	NA	NA	NA	NA	NA	NA	NA	NA	NA	NA	NA	NA	NA	NA	NA	NA	NA	NA	NA	NA
GO_HISTONE_H3_K9_ACETYLATION	NA	NA	NA	NA	NA	NA	NA	NA	NA	NA	NA	NA	NA	NA	NA	NA	NA	NA	NA	NA	NA	NA	NA	NA	NA	NA	NA	NA	NA	NA	NA	NA	NA	NA	NA	NA	NA	NA	NA	NA	NA	NA	NA	NA	NA	NA	NA	NA	NA
GO_HISTONE_H3_K9_DEMETHYLATION	NA	NA	NA	NA	NA	NA	NA	NA	0.0248295	NA	NA	NA	NA	NA	NA	0.0104503	NA	0.025371	NA	0.031199	0.0164023	NA	0.106001	0.00454148	0.0285789	NA	NA	NA	NA	NA	NA	NA	NA	NA	NA	NA	NA	NA	NA	NA	NA	NA	NA	NA	NA	NA	NA	NA	NA
GO_HISTONE_H3_K9_METHYLATION	NA	NA	NA	NA	NA	NA	NA	NA	NA	NA	NA	0.0482491	NA	NA	NA	NA	0.0211185	0.148561	0.518721	0.0403705	NA	NA	0.0367834	0.243113	NA	NA	NA	NA	NA	NA	0.00985122	0.317357	NA	NA	0.000567322	0.284017	NA	NA	NA	NA	NA	NA	NA	NA	NA	NA	NA	NA	NA
GO_HISTONE_H3_K9_MODIFICATION	NA	NA	NA	NA	NA	NA	NA	NA	NA	NA	NA	NA	NA	NA	NA	NA	0.0407452	0.219676	NA	NA	0.504987	0.043598	0.0581624	0.0497407	NA	NA	NA	NA	NA	NA	0.0195952	0.388867	NA	NA	0.000132161	0.350099	NA	NA	NA	NA	NA	NA	NA	NA	NA	NA	NA	NA	NA
GO_HISTONE_H3_K9_TRIMETHYLATION	NA	NA	NA	NA	NA	NA	NA	NA	NA	NA	NA	NA	NA	NA	NA	0.0135792	NA	NA	NA	0.0400757	NA	NA	NA	NA	0.266135	0.00910075	NA	NA	NA	NA	NA	NA	NA	NA	NA	NA	NA	NA	NA	NA	NA	NA	NA	NA	0.173707	0.0188347	NA	NA	NA
GO_HISTONE_H4_ACETYLATION	NA	NA	0.000254334	0.589779	NA	NA	NA	NA	NA	NA	NA	NA	NA	NA	NA	NA	NA	NA	0.00215321	0.166066	0.0176675	NA	NA	NA	0.38872	0.026051	0.0461891	0.486871	0.682982	0.00455891	0.048792	0.154763	NA	NA	0.157294	0.0234618	0.00397645	NA	NA	NA	NA	NA	0.201352	0.0397583	0.00144783	0.0670961	0.70226	0.00425755	0.0982437
GO_HISTONE_H4_DEACETYLATION	NA	NA	NA	NA	0.00734898	NA	NA	NA	NA	NA	NA	NA	NA	NA	NA	NA	NA	NA	NA	NA	NA	NA	NA	NA	NA	NA	NA	NA	NA	NA	NA	NA	NA	NA	NA	0.000102962	NA	NA	NA	NA	NA	NA	NA	0.00594836	NA	NA	NA	NA	NA
GO_HISTONE_H4_K16_ACETYLATION	NA	NA	0.0284745	NA	NA	NA	NA	NA	NA	NA	NA	NA	NA	NA	NA	NA	NA	NA	NA	NA	NA	NA	NA	NA	NA	NA	NA	NA	NA	NA	NA	NA	NA	NA	0.191916	0.000778233	0.0157932	NA	NA	NA	NA	NA	NA	NA	NA	NA	NA	NA	0.147293
GO_HISTONE_H4_K20_METHYLATION	NA	NA	NA	NA	NA	NA	NA	NA	NA	NA	NA	NA	NA	NA	NA	NA	NA	NA	NA	NA	NA	NA	NA	NA	NA	NA	NA	NA	0.0108653	NA	NA	NA	NA	NA	NA	NA	NA	NA	NA	NA	NA	NA	NA	NA	NA	NA	NA	NA	NA
GO_HISTONE_H4_K5_ACETYLATION	NA	NA	0.016956	NA	NA	0.0215196	0.0266982	NA	NA	NA	NA	NA	NA	NA	0.0286364	0.165356	NA	NA	0.0363924	0.277211	NA	NA	NA	NA	NA	NA	NA	NA	NA	NA	NA	NA	NA	NA	NA	NA	0.0093004	NA	NA	NA	NA	NA	NA	NA	NA	NA	NA	NA	NA
GO_HISTONE_KINASE_ACTIVITY	NA	NA	NA	NA	NA	NA	NA	NA	NA	NA	NA	NA	NA	NA	NA	0.0152771	NA	NA	NA	NA	NA	NA	NA	NA	NA	NA	NA	NA	NA	NA	NA	NA	NA	NA	NA	NA	NA	NA	NA	NA	NA	NA	NA	NA	NA	NA	NA	NA	NA
GO_HISTONE_LYSINE_N_METHYLTRANSFERASE_ACTIVITY	NA	NA	NA	NA	NA	NA	NA	NA	NA	NA	NA	0.00783358	NA	NA	NA	NA	NA	NA	NA	NA	NA	NA	NA	NA	NA	NA	NA	NA	NA	NA	NA	NA	NA	NA	0.000995329	0.320849	NA	NA	NA	NA	NA	NA	NA	NA	0.01522	0.446805	NA	NA	NA
GO_HISTONE_METHYLATION	NA	NA	NA	NA	NA	NA	NA	NA	0.0140189	0.159735	NA	0.0107303	0.0103985	0.185727	NA	NA	NA	NA	NA	NA	0.0166524	0.25288	0.00101206	0.280294	0.0203492	0.142082	0.024396	0.393276	0.0295156	0.398486	NA	NA	0.0150727	0.172108	NA	NA	NA	NA	NA	NA	NA	NA	NA	NA	0.0278739	0.29847	NA	NA	NA
GO_HISTONE_METHYLTRANSFERASE_ACTIVITY	NA	0.0423594	NA	NA	NA	NA	NA	NA	0.281759	0.0110371	NA	0.0173871	NA	NA	NA	NA	NA	NA	0.0259176	NA	NA	NA	0.0116474	0.351251	NA	NA	NA	NA	NA	NA	NA	NA	0.0217554	0.447385	0.00296738	0.404894	NA	NA	NA	NA	0.0128342	NA	NA	NA	0.0328551	0.548053	NA	NA	NA
GO_HISTONE_METHYLTRANSFERASE_ACTIVITY_H3_K36_SPECIFIC	NA	NA	NA	NA	NA	NA	NA	NA	NA	NA	NA	0.00529768	NA	NA	NA	NA	NA	NA	NA	NA	NA	NA	NA	NA	NA	NA	NA	NA	0.0155985	NA	NA	NA	0.00625538	0.113507	0.00625538	0.100066	NA	NA	NA	NA	NA	NA	NA	NA	0.00033386	NA	NA	NA	NA
GO_HISTONE_METHYLTRANSFERASE_ACTIVITY_H3_K9_SPECIFIC	NA	NA	NA	NA	NA	NA	NA	NA	NA	NA	NA	NA	NA	NA	NA	NA	0.0100188	NA	NA	NA	NA	NA	NA	NA	NA	NA	NA	NA	NA	NA	NA	NA	NA	NA	0.000115232	0.0841079	NA	NA	NA	NA	0.00976468	NA	NA	NA	NA	NA	NA	NA	NA
GO_HISTONE_METHYLTRANSFERASE_COMPLEX	0.0273592	NA	NA	NA	0.236219	0.000117736	NA	NA	0.0480995	0.312956	NA	NA	NA	NA	NA	NA	NA	NA	NA	NA	NA	NA	0.0236369	0.431632	0.0160838	NA	NA	NA	0.130056	0.0376968	NA	NA	NA	NA	0.542723	0.00465293	NA	NA	NA	NA	NA	NA	NA	NA	NA	NA	NA	NA	NA
GO_HISTONE_MONOUBIQUITINATION	NA	NA	NA	NA	NA	NA	NA	NA	NA	NA	NA	NA	NA	NA	NA	NA	NA	NA	NA	NA	NA	NA	NA	NA	NA	NA	NA	NA	NA	NA	NA	NA	NA	NA	NA	NA	NA	NA	NA	NA	NA	NA	NA	NA	NA	NA	NA	NA	NA
GO_HISTONE_PHOSPHORYLATION	NA	NA	NA	NA	NA	NA	0.026306	0.125636	NA	NA	NA	NA	NA	NA	NA	NA	NA	NA	NA	NA	NA	NA	0.0403953	0.25414	0.040832	NA	NA	NA	NA	NA	NA	NA	NA	NA	NA	NA	NA	NA	NA	NA	0.0233572	NA	NA	NA	NA	NA	0.0308514	0.458731	NA
GO_HISTONE_SERINE_PHOSPHORYLATION	NA	NA	NA	NA	NA	NA	NA	NA	NA	NA	NA	NA	NA	NA	NA	NA	NA	NA	NA	NA	NA	NA	NA	NA	0.0212549	NA	NA	NA	NA	NA	NA	NA	NA	NA	NA	NA	NA	NA	NA	NA	NA	NA	NA	NA	NA	NA	NA	NA	NA
GO_HISTONE_UBIQUITINATION	NA	NA	NA	NA	NA	NA	NA	NA	NA	NA	NA	NA	NA	NA	NA	NA	NA	NA	NA	NA	NA	0.0420008	NA	NA	NA	NA	NA	NA	NA	NA	NA	NA	NA	NA	NA	NA	NA	NA	NA	NA	NA	NA	NA	NA	NA	NA	NA	NA	NA
GO_HOMEOSTASIS_OF_NUMBER_OF_CELLS	NA	NA	0.223337	0.0163592	NA	NA	NA	NA	NA	NA	NA	NA	0.46716	0.00721468	NA	NA	NA	NA	NA	NA	NA	NA	NA	NA	NA	NA	NA	NA	NA	NA	NA	NA	NA	NA	NA	NA	NA	NA	NA	NA	NA	NA	NA	NA	NA	NA	NA	NA	0.0450869
GO_HOMEOSTASIS_OF_NUMBER_OF_CELLS_WITHIN_A_TISSUE	NA	NA	NA	NA	NA	NA	NA	NA	NA	NA	NA	NA	NA	NA	NA	NA	NA	NA	NA	NA	NA	NA	NA	NA	NA	NA	NA	NA	NA	NA	NA	NA	NA	0.00295984	NA	NA	NA	NA	NA	NA	NA	NA	NA	NA	NA	NA	NA	NA	NA
GO_HOMOCYSTEINE_METABOLIC_PROCESS	NA	NA	NA	NA	NA	NA	NA	NA	NA	NA	NA	NA	NA	NA	NA	NA	NA	NA	NA	NA	NA	NA	NA	0.00454148	NA	NA	NA	NA	NA	NA	NA	NA	NA	NA	NA	NA	NA	NA	NA	NA	NA	NA	NA	NA	NA	NA	0.0232347	NA	NA
GO_HOMOLOGOUS_RECOMBINATION	NA	NA	NA	NA	NA	NA	NA	NA	NA	NA	NA	NA	NA	NA	NA	NA	NA	NA	NA	NA	NA	NA	NA	NA	NA	NA	0.0262397	0.413503	NA	NA	NA	NA	NA	NA	NA	NA	NA	NA	NA	NA	NA	NA	NA	NA	NA	NA	NA	NA	NA
GO_HOMOPHILIC_CELL_ADHESION_VIA_PLASMA_MEMBRANE_ADHESION_MOLECULES	NA	NA	NA	NA	NA	NA	NA	NA	NA	NA	NA	NA	NA	NA	NA	NA	NA	NA	NA	NA	NA	NA	NA	NA	NA	NA	NA	NA	NA	NA	0.0477159	0.088069	NA	NA	NA	NA	NA	NA	NA	NA	NA	NA	NA	NA	NA	NA	NA	NA	NA
GO_HOMOTYPIC_CELL_CELL_ADHESION	NA	NA	NA	NA	0.0199891	NA	NA	NA	NA	NA	NA	NA	NA	NA	NA	NA	NA	NA	NA	NA	NA	NA	NA	NA	NA	NA	NA	NA	NA	NA	NA	NA	NA	NA	NA	NA	NA	NA	NA	NA	NA	NA	NA	NA	NA	NA	NA	NA	NA
GO_HOPS_COMPLEX	NA	NA	NA	NA	NA	NA	NA	NA	NA	NA	NA	NA	NA	0.0144869	NA	NA	NA	NA	NA	NA	NA	NA	NA	NA	NA	NA	NA	NA	NA	NA	NA	NA	NA	NA	NA	NA	NA	NA	NA	NA	NA	NA	NA	NA	NA	NA	NA	NA	NA
GO_HORMONE_MEDIATED_SIGNALING_PATHWAY	NA	NA	0.246626	0.0417816	NA	NA	NA	NA	NA	NA	NA	NA	NA	NA	NA	NA	0.0133491	0.15189	NA	NA	NA	NA	NA	NA	0.0151964	0.110294	NA	NA	NA	NA	0.0304753	0.867068	NA	NA	NA	NA	NA	NA	NA	NA	NA	NA	NA	NA	0.0898995	0.0181501	NA	NA	NA
GO_HORMONE_METABOLIC_PROCESS	0.558438	0.0345018	0.770978	0.00204431	NA	NA	NA	NA	NA	NA	NA	NA	NA	NA	NA	NA	NA	NA	NA	NA	NA	NA	NA	NA	NA	NA	NA	NA	NA	NA	NA	NA	NA	NA	NA	NA	NA	NA	NA	NA	NA	NA	0.048358	0.690272	NA	NA	NA	NA	NA
GO_HORMONE_RECEPTOR_BINDING	NA	NA	0.38728	0.00188297	NA	NA	0.318411	0.0198367	NA	NA	NA	NA	NA	NA	NA	NA	NA	NA	NA	NA	0.0135718	0.337882	NA	NA	0.252102	0.0231334	0.00433076	0.235671	NA	NA	0.342432	0.00881604	0.265068	0.0326372	NA	NA	NA	NA	NA	NA	NA	NA	0.622703	0.0427913	NA	NA	NA	NA	NA
GO_HORMONE_TRANSPORT	NA	NA	NA	NA	NA	NA	NA	NA	NA	NA	NA	NA	NA	NA	NA	NA	NA	NA	NA	NA	NA	NA	NA	NA	NA	NA	NA	NA	NA	NA	NA	NA	NA	NA	NA	NA	NA	NA	NA	NA	NA	NA	NA	NA	NA	NA	NA	NA	NA
GO_HOST_CELL_PART	NA	NA	NA	NA	NA	NA	NA	NA	NA	NA	NA	NA	NA	0.0195686	NA	NA	NA	NA	NA	NA	NA	NA	NA	NA	NA	NA	NA	NA	0.0210529	NA	NA	NA	NA	NA	NA	NA	NA	NA	NA	NA	NA	NA	NA	NA	NA	NA	0.0232347	NA	NA
GO_HOST_CELLULAR_COMPONENT	NA	NA	NA	NA	NA	NA	NA	NA	NA	NA	NA	NA	NA	NA	NA	NA	NA	NA	NA	NA	NA	NA	NA	NA	NA	NA	NA	NA	NA	NA	NA	NA	NA	NA	NA	NA	NA	NA	0.0384175	NA	NA	NA	NA	NA	NA	NA	0.0252758	NA	NA
GO_HSP70_PROTEIN_BINDING	NA	NA	NA	NA	NA	NA	NA	NA	NA	NA	NA	NA	NA	NA	NA	NA	NA	NA	0.00818787	0.20617	0.021752	NA	NA	NA	NA	NA	NA	NA	NA	NA	NA	NA	NA	NA	NA	NA	NA	NA	NA	NA	NA	NA	NA	NA	NA	NA	NA	NA	NA
GO_HSP90_PROTEIN_BINDING	NA	NA	0.413888	0.0158897	NA	NA	0.494466	0.0038655	0.170823	0.0236481	NA	0.00688233	0.0887903	0.0277029	NA	NA	NA	0.00668163	NA	NA	0.00293583	NA	NA	NA	NA	NA	NA	0.00731288	NA	NA	NA	NA	NA	NA	NA	NA	NA	NA	NA	NA	NA	NA	NA	NA	0.3942	0.0184092	NA	NA	0.273018
GO_HYALURONAN_CATABOLIC_PROCESS	0.00785139	NA	NA	NA	NA	NA	NA	NA	NA	NA	NA	NA	NA	NA	NA	NA	NA	NA	NA	NA	NA	NA	NA	NA	NA	NA	NA	NA	NA	NA	NA	NA	NA	NA	NA	NA	NA	NA	NA	NA	NA	NA	NA	NA	NA	NA	NA	0.0240501	NA
GO_HYALURONAN_METABOLIC_PROCESS	0.0388381	NA	NA	NA	NA	NA	NA	NA	NA	NA	NA	NA	NA	NA	NA	NA	NA	NA	NA	NA	NA	NA	NA	NA	NA	NA	NA	NA	NA	NA	NA	NA	NA	NA	NA	NA	NA	NA	NA	NA	NA	NA	NA	NA	NA	NA	NA	0.0184951	NA
GO_HYALURONIC_ACID_BINDING	0.000806357	NA	NA	NA	NA	NA	NA	0.00445684	NA	NA	0.0243762	0.185221	NA	NA	NA	NA	0.0455111	NA	NA	NA	0.0386539	NA	NA	NA	NA	NA	NA	NA	NA	NA	NA	NA	NA	NA	NA	NA	NA	NA	NA	NA	NA	NA	NA	NA	0.00214134	0.256103	NA	NA	NA
GO_HYDRO_LYASE_ACTIVITY	NA	NA	0.00655552	0.170841	NA	NA	NA	NA	0.0206566	0.583063	NA	NA	NA	NA	NA	NA	0.234167	0.0214493	NA	NA	NA	NA	NA	NA	NA	NA	NA	NA	NA	NA	NA	NA	NA	NA	NA	NA	NA	NA	NA	NA	NA	NA	NA	NA	NA	NA	NA	NA	NA
GO_HYDROGEN_PEROXIDE_BIOSYNTHETIC_PROCESS	NA	NA	NA	NA	NA	NA	NA	NA	NA	NA	NA	NA	NA	NA	NA	NA	NA	NA	NA	NA	NA	NA	NA	NA	NA	NA	NA	NA	NA	NA	NA	NA	NA	NA	NA	NA	NA	NA	NA	NA	NA	NA	NA	NA	NA	NA	NA	NA	NA
GO_HYDROGEN_PEROXIDE_METABOLIC_PROCESS	NA	NA	NA	NA	NA	NA	NA	NA	NA	NA	NA	NA	NA	NA	NA	NA	NA	NA	NA	NA	NA	NA	NA	NA	NA	NA	NA	NA	NA	NA	NA	NA	NA	NA	NA	NA	NA	NA	NA	0.0377931	NA	NA	NA	NA	NA	NA	NA	NA	NA
GO_HYDROLASE_ACTIVITY_ACTING_ON_CARBON_NITROGEN_BUT_NOT_PEPTIDE_BONDS	NA	NA	NA	NA	0.00356895	0.0985847	NA	NA	NA	NA	NA	NA	NA	NA	NA	NA	NA	NA	NA	NA	0.0304178	0.200526	NA	NA	NA	NA	NA	NA	NA	NA	0.0143855	NA	NA	NA	0.1259	0.00439149	NA	NA	NA	NA	0.0402556	0.114752	NA	NA	NA	NA	0.621028	0.0388128	0.235257
GO_HYDROLASE_ACTIVITY_ACTING_ON_CARBON_NITROGEN_BUT_NOT_PEPTIDE_BONDS_IN_CYCLIC_AMIDINES	NA	NA	NA	NA	NA	NA	NA	NA	NA	NA	NA	NA	NA	NA	NA	NA	NA	NA	NA	NA	NA	NA	NA	0.0268771	NA	NA	NA	NA	NA	NA	NA	NA	NA	NA	0.299021	0.0374634	NA	NA	NA	NA	NA	NA	NA	NA	NA	NA	NA	NA	0.0286629
GO_HYDROLASE_ACTIVITY_ACTING_ON_CARBON_NITROGEN_BUT_NOT_PEPTIDE_BONDS_IN_LINEAR_AMIDES	NA	NA	NA	NA	0.00153323	0.0792488	0.0263179	0.093003	NA	NA	NA	NA	NA	NA	NA	NA	NA	NA	NA	NA	0.0176675	0.0817602	NA	NA	NA	NA	NA	NA	NA	NA	0.048792	NA	NA	NA	0.157294	0.0234618	NA	NA	NA	NA	0.0227013	0.0901764	NA	0.0397583	NA	NA	NA	NA	NA
GO_HYDROLASE_ACTIVITY_ACTING_ON_GLYCOSYL_BONDS	NA	NA	NA	NA	NA	NA	NA	NA	NA	NA	NA	NA	NA	NA	NA	NA	NA	NA	NA	NA	NA	NA	NA	NA	NA	NA	0.78204	0.0369371	NA	NA	0.458352	0.000366103	NA	NA	NA	NA	NA	NA	NA	NA	NA	NA	NA	NA	NA	NA	0.898564	0.000943021	NA
GO_HYDROLASE_ACTIVITY_HYDROLYZING_N_GLYCOSYL_COMPOUNDS	NA	NA	NA	NA	NA	NA	NA	NA	0.456329	0.0134273	NA	NA	NA	NA	NA	NA	NA	NA	NA	NA	NA	NA	NA	NA	NA	NA	NA	NA	NA	NA	NA	0.00467335	NA	0.0451719	NA	NA	NA	NA	NA	NA	NA	NA	NA	NA	NA	NA	NA	NA	0.0271574
GO_HYDROLASE_ACTIVITY_HYDROLYZING_O_GLYCOSYL_COMPOUNDS	NA	NA	NA	NA	NA	NA	NA	NA	NA	NA	NA	NA	NA	NA	NA	NA	NA	NA	NA	NA	NA	NA	NA	NA	NA	NA	NA	NA	NA	NA	0.30532	0.00264453	NA	NA	NA	NA	NA	NA	NA	NA	NA	NA	NA	NA	0.678657	0.0384814	0.807046	0.000619475	NA
GO_HYPEROSMOTIC_RESPONSE	NA	NA	NA	NA	NA	NA	NA	NA	NA	NA	0.0382037	NA	0.0326763	NA	0.0792091	0.039181	NA	NA	NA	NA	NA	NA	NA	NA	NA	NA	0.040499	NA	NA	NA	NA	NA	NA	NA	NA	NA	NA	NA	NA	NA	NA	NA	NA	NA	NA	NA	NA	NA	0.018844
GO_I_BAND	NA	NA	NA	NA	NA	NA	0.000447664	0.169332	NA	NA	NA	NA	NA	NA	0.415599	0.00504921	NA	NA	NA	NA	NA	NA	NA	NA	NA	NA	NA	NA	NA	NA	NA	NA	NA	NA	NA	NA	0.00962994	0.365099	NA	NA	NA	NA	NA	NA	NA	NA	NA	NA	NA
GO_I_KAPPAB_KINASE_NF_KAPPAB_SIGNALING	NA	NA	0.0292817	0.154732	NA	NA	0.042583	0.152752	NA	NA	NA	NA	NA	NA	NA	NA	0.0357984	0.255691	NA	NA	0.583051	0.0454063	NA	NA	NA	NA	NA	NA	NA	NA	NA	NA	NA	NA	NA	NA	0.00137214	0.120847	NA	NA	0.033306	0.267668	0.661753	0.0355863	NA	NA	0.0106528	0.813281	NA
GO_I_KAPPAB_PHOSPHORYLATION	NA	NA	NA	NA	NA	NA	NA	NA	NA	NA	NA	NA	NA	NA	NA	NA	NA	NA	NA	NA	NA	NA	NA	NA	NA	NA	NA	NA	NA	NA	NA	NA	NA	NA	NA	NA	NA	NA	NA	NA	NA	NA	NA	NA	NA	0.0287993	0.0453647	0.264172	NA
GO_I_SMAD_BINDING	NA	NA	NA	NA	NA	NA	NA	NA	NA	NA	NA	NA	NA	NA	NA	NA	NA	NA	NA	NA	NA	NA	NA	NA	NA	NA	NA	NA	NA	NA	NA	NA	NA	NA	NA	NA	NA	NA	NA	NA	NA	NA	NA	NA	NA	NA	NA	NA	NA
GO_IMIDAZOLE_CONTAINING_COMPOUND_METABOLIC_PROCESS	NA	NA	NA	NA	NA	NA	NA	NA	NA	NA	NA	NA	0.0472148	NA	NA	NA	NA	NA	NA	NA	NA	NA	NA	NA	NA	NA	NA	NA	NA	NA	NA	NA	NA	NA	NA	NA	NA	NA	NA	NA	NA	NA	NA	NA	NA	NA	NA	NA	NA
GO_IMMUNE_RESPONSE_TO_TUMOR_CELL	NA	NA	NA	NA	NA	NA	NA	NA	NA	0.0343556	NA	NA	NA	NA	NA	NA	NA	NA	NA	NA	NA	NA	NA	NA	NA	NA	NA	NA	NA	NA	NA	NA	NA	NA	NA	NA	NA	NA	NA	NA	NA	NA	NA	NA	NA	NA	NA	NA	NA
GO_IMMUNOGLOBULIN_BINDING	NA	NA	NA	NA	NA	0.0459332	NA	NA	NA	NA	NA	NA	NA	NA	NA	NA	NA	NA	NA	NA	NA	NA	NA	NA	NA	NA	NA	NA	NA	NA	NA	NA	NA	NA	NA	NA	NA	NA	NA	NA	NA	NA	NA	NA	NA	NA	NA	NA	NA
GO_IMMUNOGLOBULIN_PRODUCTION_INVOLVED_IN_IMMUNOGLOBULIN_MEDIATED_IMMUNE_RESPONSE	NA	NA	NA	NA	NA	NA	NA	NA	NA	NA	NA	NA	NA	NA	NA	NA	NA	NA	NA	NA	NA	NA	NA	NA	NA	NA	NA	NA	NA	NA	NA	NA	NA	NA	NA	NA	NA	NA	NA	NA	NA	NA	NA	NA	NA	NA	0.651988	0.0138925	NA
GO_IMMUNOGLOBULIN_SECRETION	NA	NA	NA	NA	NA	NA	NA	NA	NA	NA	NA	NA	NA	NA	NA	NA	NA	NA	NA	NA	NA	NA	NA	NA	NA	NA	NA	NA	NA	NA	NA	NA	NA	NA	NA	NA	NA	NA	NA	NA	NA	NA	NA	NA	NA	NA	NA	NA	NA
GO_IMMUNOLOGICAL_MEMORY_FORMATION_PROCESS	NA	NA	NA	0.00810037	NA	NA	NA	NA	NA	NA	NA	NA	NA	NA	NA	NA	NA	NA	NA	NA	NA	NA	NA	NA	NA	NA	NA	NA	NA	NA	NA	NA	NA	NA	NA	NA	NA	NA	NA	NA	NA	NA	NA	NA	NA	NA	NA	NA	NA
GO_IMMUNOLOGICAL_MEMORY_PROCESS	NA	NA	NA	0.0130729	NA	NA	NA	NA	NA	NA	NA	NA	NA	NA	NA	NA	NA	NA	NA	NA	NA	NA	NA	NA	NA	NA	NA	NA	NA	NA	NA	NA	NA	NA	NA	NA	NA	NA	NA	NA	NA	NA	NA	NA	NA	NA	NA	NA	NA
GO_IMMUNOLOGICAL_SYNAPSE	NA	NA	NA	NA	NA	NA	NA	NA	NA	NA	NA	NA	NA	NA	NA	NA	NA	0.00512051	NA	NA	NA	NA	0.038573	NA	NA	NA	NA	NA	NA	NA	NA	NA	NA	NA	NA	NA	NA	NA	NA	NA	NA	NA	NA	NA	NA	NA	NA	NA	NA
GO_IMMUNOLOGICAL_SYNAPSE_FORMATION	NA	NA	NA	NA	NA	NA	NA	NA	NA	0.0174307	NA	NA	NA	NA	NA	NA	NA	NA	NA	NA	NA	NA	NA	NA	NA	NA	NA	NA	NA	NA	NA	NA	NA	NA	NA	NA	NA	NA	NA	NA	NA	NA	NA	NA	NA	NA	NA	NA	NA
GO_IMP_BIOSYNTHETIC_PROCESS	NA	NA	NA	NA	NA	NA	NA	NA	NA	NA	NA	NA	NA	NA	NA	NA	NA	NA	NA	NA	NA	NA	NA	NA	NA	NA	NA	NA	NA	NA	NA	NA	NA	NA	NA	NA	NA	NA	NA	NA	NA	NA	NA	NA	NA	NA	NA	NA	NA
GO_IMP_METABOLIC_PROCESS	NA	NA	NA	NA	NA	NA	NA	NA	NA	NA	NA	NA	NA	NA	NA	NA	NA	NA	NA	NA	NA	NA	NA	NA	NA	NA	NA	NA	NA	NA	NA	0.00719909	NA	NA	NA	NA	NA	NA	NA	NA	NA	NA	0.0100061	0.131272	NA	NA	NA	NA	NA
GO_IMPORT_ACROSS_PLASMA_MEMBRANE	NA	NA	NA	NA	NA	NA	NA	NA	NA	NA	NA	NA	NA	NA	NA	NA	NA	NA	0.803387	0.0394351	NA	NA	0.0370592	0.107526	NA	NA	NA	NA	NA	NA	NA	NA	NA	NA	NA	NA	NA	NA	NA	NA	NA	NA	NA	NA	NA	NA	NA	NA	NA
GO_IMPORT_INTO_CELL	NA	NA	NA	NA	NA	NA	NA	NA	NA	NA	NA	NA	NA	NA	NA	NA	NA	NA	NA	NA	NA	NA	0.0372119	0.0880628	NA	NA	NA	NA	NA	NA	NA	NA	NA	NA	0.0294942	0.868973	NA	NA	NA	NA	NA	NA	NA	NA	NA	NA	0.00213171	0.8676	NA
GO_IMPORT_INTO_NUCLEUS	NA	NA	NA	NA	NA	NA	NA	NA	0.587687	0.0409157	NA	NA	0.0295895	0.933157	NA	NA	NA	NA	NA	NA	NA	NA	0.0481172	NA	NA	NA	NA	NA	NA	NA	NA	NA	0.029851	0.82165	NA	NA	NA	NA	NA	NA	NA	NA	NA	NA	NA	NA	NA	NA	NA
GO_IN_UTERO_EMBRYONIC_DEVELOPMENT	NA	NA	0.00970901	0.0548726	NA	NA	0.276658	0.000914636	0.041593	0.666417	NA	NA	0.017815	0.0792393	NA	NA	NA	NA	NA	NA	NA	NA	0.0340368	0.772153	NA	NA	0.00475066	0.297614	NA	NA	0.0816122	0.00527593	NA	NA	NA	NA	NA	NA	NA	NA	0.0353503	0.129728	NA	NA	NA	NA	0.484527	0.0147445	NA
GO_INCLUSION_BODY	NA	NA	NA	NA	0.0144522	0.676446	NA	NA	NA	NA	NA	NA	NA	NA	NA	NA	NA	NA	NA	NA	NA	NA	NA	NA	NA	NA	NA	0.0378949	NA	NA	NA	NA	NA	NA	NA	NA	NA	NA	NA	NA	NA	NA	NA	NA	NA	NA	NA	NA	NA
GO_INCLUSION_BODY_ASSEMBLY	NA	NA	NA	NA	NA	NA	NA	0.00572656	NA	NA	NA	NA	NA	NA	NA	NA	NA	NA	NA	NA	NA	NA	NA	NA	NA	NA	NA	NA	NA	NA	NA	NA	NA	NA	NA	NA	NA	NA	NA	NA	NA	NA	NA	NA	NA	0.040407	NA	NA	NA
GO_INDOLALKYLAMINE_METABOLIC_PROCESS	NA	NA	NA	NA	NA	NA	NA	NA	NA	NA	NA	NA	NA	NA	0.0321022	NA	0.234313	0.0366047	NA	NA	NA	NA	NA	NA	NA	NA	NA	NA	NA	NA	NA	NA	NA	NA	NA	NA	NA	NA	NA	NA	NA	NA	NA	NA	NA	NA	NA	NA	NA
GO_INDOLE_CONTAINING_COMPOUND_METABOLIC_PROCESS	NA	NA	NA	NA	NA	NA	NA	NA	NA	NA	NA	NA	NA	NA	NA	NA	NA	NA	NA	NA	NA	NA	NA	NA	NA	NA	NA	NA	NA	NA	NA	NA	NA	NA	NA	NA	NA	NA	NA	NA	NA	NA	NA	NA	NA	NA	NA	NA	NA
GO_INDUCTION_OF_POSITIVE_CHEMOTAXIS	NA	NA	NA	NA	NA	NA	NA	NA	NA	NA	NA	NA	NA	NA	NA	NA	NA	NA	NA	NA	NA	NA	NA	NA	NA	NA	NA	NA	NA	NA	0.0112952	0.131137	NA	NA	NA	NA	NA	NA	NA	NA	NA	NA	NA	NA	NA	NA	0.0232347	NA	0.00486042
GO_INFLAMMASOME_COMPLEX	NA	NA	NA	NA	NA	NA	NA	NA	NA	NA	NA	NA	NA	NA	NA	NA	NA	NA	0.00318994	NA	NA	NA	NA	NA	NA	NA	NA	NA	NA	NA	NA	NA	NA	0.0108601	NA	NA	NA	NA	NA	NA	NA	NA	NA	NA	NA	NA	NA	NA	NA
GO_INFLAMMATORY_CELL_APOPTOTIC_PROCESS	NA	NA	NA	NA	NA	NA	NA	NA	NA	NA	NA	NA	0.429833	0.0457834	NA	NA	NA	NA	NA	NA	NA	NA	NA	NA	NA	NA	NA	NA	NA	NA	NA	NA	NA	NA	NA	NA	NA	NA	NA	NA	NA	NA	NA	NA	NA	NA	NA	NA	0.0118604
GO_INHIBITORY_POSTSYNAPTIC_POTENTIAL	NA	NA	NA	NA	NA	NA	NA	NA	NA	NA	NA	NA	0.368481	0.0315828	NA	NA	NA	NA	NA	NA	NA	NA	NA	NA	NA	NA	NA	NA	NA	NA	NA	NA	NA	NA	NA	NA	NA	NA	NA	NA	NA	NA	NA	NA	NA	NA	NA	NA	NA
GO_INHIBITORY_SYNAPSE	NA	NA	NA	NA	NA	NA	NA	NA	NA	NA	NA	NA	NA	0.0283615	NA	NA	NA	NA	NA	NA	NA	NA	NA	NA	NA	NA	NA	NA	NA	NA	NA	NA	NA	NA	NA	NA	NA	NA	NA	NA	NA	NA	NA	NA	NA	NA	NA	NA	NA
GO_INNATE_IMMUNE_RESPONSE_ACTIVATING_SIGNAL_TRANSDUCTION	NA	NA	0.431731	0.0159231	NA	NA	0.848574	0.00908473	NA	NA	NA	NA	NA	NA	NA	NA	NA	NA	NA	NA	NA	NA	NA	NA	NA	NA	NA	NA	NA	NA	NA	NA	NA	NA	NA	NA	NA	NA	NA	NA	NA	NA	NA	NA	NA	NA	NA	NA	NA
GO_INNER_EAR_AUDITORY_RECEPTOR_CELL_DIFFERENTIATION	NA	NA	NA	NA	NA	NA	NA	NA	NA	NA	NA	NA	NA	NA	NA	NA	NA	NA	NA	NA	NA	NA	NA	NA	NA	NA	NA	NA	0.445831	0.0464278	NA	NA	NA	NA	NA	NA	NA	NA	NA	NA	NA	NA	NA	NA	0.00879155	NA	NA	NA	NA
GO_INNER_EAR_RECEPTOR_CELL_DEVELOPMENT	NA	NA	NA	NA	NA	NA	NA	NA	NA	NA	NA	NA	NA	NA	NA	NA	NA	NA	0.0482877	NA	NA	NA	NA	NA	NA	NA	NA	NA	NA	NA	NA	NA	NA	NA	NA	NA	NA	NA	NA	NA	NA	NA	NA	NA	NA	NA	NA	NA	NA
GO_INNER_EAR_RECEPTOR_CELL_STEREOCILIUM_ORGANIZATION	NA	NA	NA	NA	NA	NA	NA	NA	NA	NA	NA	0.0313187	NA	NA	NA	NA	NA	NA	0.0190098	NA	NA	NA	NA	NA	NA	NA	NA	NA	NA	NA	NA	NA	NA	NA	NA	NA	NA	NA	NA	NA	NA	NA	NA	NA	NA	NA	NA	NA	NA
GO_INNER_MITOCHONDRIAL_MEMBRANE_ORGANIZATION	NA	NA	NA	NA	NA	NA	NA	NA	NA	NA	NA	NA	NA	NA	NA	NA	NA	NA	0.260582	0.0203216	NA	NA	NA	NA	NA	NA	NA	NA	NA	NA	NA	NA	NA	NA	NA	NA	NA	NA	NA	NA	NA	NA	NA	NA	NA	NA	NA	NA	NA
GO_INNER_MITOCHONDRIAL_MEMBRANE_PROTEIN_COMPLEX	0.324772	0.0413305	NA	NA	NA	NA	NA	NA	NA	NA	NA	NA	NA	NA	NA	NA	0.63622	0.0384954	NA	NA	NA	NA	NA	NA	NA	NA	NA	NA	NA	NA	NA	NA	NA	NA	NA	NA	0.0389075	0.718351	0.0282224	NA	NA	NA	NA	NA	NA	NA	NA	NA	NA
GO_INO80_TYPE_COMPLEX	NA	NA	0.0393642	NA	NA	0.049466	NA	NA	0.00954429	NA	NA	NA	NA	NA	NA	NA	NA	NA	NA	NA	NA	NA	NA	NA	0.0821784	0.021567	NA	NA	0.336219	0.00170002	NA	NA	NA	NA	NA	NA	NA	NA	NA	NA	NA	NA	0.0350728	0.237162	NA	NA	NA	NA	NA
GO_INORGANIC_ANION_TRANSMEMBRANE_TRANSPORT	NA	NA	NA	NA	NA	NA	NA	NA	NA	NA	NA	NA	NA	NA	NA	NA	NA	NA	NA	0.0111563	NA	NA	NA	NA	NA	NA	NA	NA	NA	NA	NA	NA	NA	NA	NA	NA	NA	NA	NA	NA	NA	NA	NA	NA	NA	NA	NA	NA	NA
GO_INORGANIC_ANION_TRANSMEMBRANE_TRANSPORTER_ACTIVITY	NA	NA	NA	NA	NA	NA	NA	NA	NA	NA	NA	NA	NA	NA	NA	NA	NA	NA	NA	0.0272828	NA	NA	NA	NA	NA	NA	0.495637	0.0492236	NA	NA	NA	NA	NA	NA	NA	NA	NA	NA	NA	NA	NA	NA	NA	NA	NA	NA	NA	NA	NA
GO_INORGANIC_ANION_TRANSPORT	NA	NA	NA	NA	NA	NA	NA	NA	NA	NA	NA	NA	NA	NA	NA	NA	NA	NA	NA	NA	NA	NA	NA	NA	NA	NA	0.587697	0.024057	NA	NA	NA	NA	NA	NA	NA	NA	NA	NA	NA	NA	NA	NA	NA	NA	NA	NA	NA	NA	NA
GO_INOSITOL_1_4_5_TRISPHOSPHATE_BINDING	NA	NA	NA	NA	NA	NA	0.0179117	NA	NA	NA	NA	NA	NA	NA	NA	NA	NA	NA	NA	NA	NA	NA	NA	NA	NA	NA	NA	NA	NA	NA	NA	NA	NA	NA	NA	NA	NA	NA	NA	NA	NA	NA	NA	NA	NA	NA	NA	NA	NA
GO_INOSITOL_LIPID_MEDIATED_SIGNALING	NA	NA	NA	NA	NA	NA	NA	NA	NA	NA	NA	NA	NA	NA	0.0175412	0.378084	NA	NA	NA	NA	NA	NA	NA	NA	NA	NA	NA	NA	NA	NA	NA	NA	NA	NA	NA	NA	NA	NA	NA	NA	NA	NA	NA	NA	NA	NA	0.00682098	0.575545	NA
GO_INOSITOL_METABOLIC_PROCESS	NA	NA	NA	NA	NA	NA	NA	NA	NA	NA	NA	NA	NA	NA	NA	NA	NA	NA	NA	NA	0.000432165	NA	NA	NA	NA	NA	NA	NA	NA	NA	NA	NA	NA	NA	NA	NA	NA	NA	NA	NA	NA	0.011512	NA	NA	NA	NA	NA	NA	NA
GO_INOSITOL_PHOSPHATE_BIOSYNTHETIC_PROCESS	NA	NA	0.0483973	NA	NA	NA	NA	NA	NA	NA	NA	NA	NA	NA	NA	NA	NA	NA	NA	NA	NA	NA	NA	NA	NA	NA	NA	NA	NA	NA	NA	NA	NA	NA	NA	NA	NA	NA	NA	NA	NA	NA	NA	NA	NA	NA	NA	NA	NA
GO_INOSITOL_PHOSPHATE_CATABOLIC_PROCESS	NA	NA	NA	NA	NA	NA	NA	0.00247109	NA	NA	0.0166187	NA	NA	NA	NA	NA	0.0313908	NA	0.0452625	NA	NA	NA	NA	NA	NA	NA	NA	NA	NA	NA	NA	NA	NA	NA	NA	NA	NA	NA	NA	NA	NA	NA	NA	NA	NA	NA	NA	NA	NA
GO_INOSITOL_PHOSPHATE_METABOLIC_PROCESS	NA	NA	NA	NA	NA	NA	NA	NA	0.00907221	0.656284	0.0457542	0.488934	0.035123	0.310607	0.0324605	0.557168	NA	NA	NA	NA	NA	NA	NA	NA	NA	NA	NA	NA	NA	NA	NA	NA	NA	NA	NA	NA	NA	NA	NA	NA	NA	NA	NA	NA	NA	NA	0.0350383	0.669065	NA
GO_INOSITOL_PHOSPHATE_PHOSPHATASE_ACTIVITY	NA	NA	NA	NA	NA	NA	NA	0.0164196	NA	NA	NA	NA	NA	NA	NA	NA	NA	NA	0.0245564	NA	NA	NA	NA	NA	NA	NA	NA	NA	NA	NA	NA	NA	NA	NA	NA	NA	NA	NA	NA	NA	NA	NA	NA	NA	NA	NA	NA	NA	NA
GO_INSULIN_LIKE_GROWTH_FACTOR_RECEPTOR_BINDING	NA	NA	NA	NA	NA	NA	NA	NA	NA	NA	NA	NA	NA	NA	NA	NA	NA	NA	NA	NA	NA	NA	NA	NA	NA	NA	NA	NA	NA	NA	NA	NA	NA	NA	NA	NA	NA	NA	NA	NA	NA	NA	NA	NA	NA	NA	NA	NA	NA
GO_INSULIN_RECEPTOR_BINDING	NA	NA	NA	NA	NA	NA	NA	NA	NA	NA	NA	NA	NA	NA	NA	NA	0.303207	0.00778703	NA	NA	NA	NA	NA	NA	NA	NA	NA	NA	NA	NA	NA	NA	NA	NA	NA	NA	NA	NA	NA	NA	NA	NA	NA	NA	NA	NA	NA	NA	NA
GO_INSULIN_RECEPTOR_SIGNALING_PATHWAY	NA	NA	NA	NA	0.0292553	0.610309	NA	NA	NA	NA	NA	NA	NA	NA	NA	NA	NA	NA	NA	NA	NA	NA	NA	NA	NA	NA	NA	NA	NA	NA	NA	NA	NA	NA	NA	NA	NA	NA	NA	NA	0.377265	0.0219757	0.50714	0.0193664	NA	NA	0.0367382	NA	NA
GO_INSULIN_RESPONSIVE_COMPARTMENT	NA	NA	NA	NA	NA	0.00853884	NA	NA	NA	NA	NA	NA	NA	NA	NA	NA	NA	NA	NA	NA	NA	NA	NA	NA	NA	NA	NA	NA	NA	NA	NA	NA	NA	NA	NA	NA	NA	NA	0.0466103	NA	NA	NA	NA	NA	NA	NA	NA	NA	NA
GO_INSULIN_SECRETION	NA	NA	NA	NA	NA	NA	NA	NA	NA	NA	NA	NA	NA	NA	NA	NA	NA	NA	NA	NA	NA	NA	NA	NA	NA	NA	NA	NA	NA	NA	NA	NA	NA	NA	NA	NA	NA	NA	NA	NA	NA	NA	NA	NA	NA	NA	NA	NA	NA
GO_INSULIN_SECRETION_INVOLVED_IN_CELLULAR_RESPONSE_TO_GLUCOSE_STIMULUS	NA	NA	0.0490364	NA	NA	NA	NA	NA	NA	NA	NA	NA	NA	NA	NA	NA	NA	NA	NA	NA	NA	NA	NA	NA	NA	NA	NA	NA	NA	NA	NA	NA	NA	NA	NA	NA	NA	NA	0.0384175	0.296252	NA	NA	0.041948	0.154916	NA	NA	0.0051028	0.260093	NA
GO_INTEGRAL_COMPONENT_OF_PRESYNAPTIC_ACTIVE_ZONE_MEMBRANE	NA	NA	NA	NA	NA	NA	NA	NA	NA	NA	NA	NA	NA	0.022349	NA	NA	0.209872	0.028932	NA	0.0355291	NA	NA	NA	NA	NA	NA	NA	NA	NA	NA	NA	NA	NA	NA	NA	NA	NA	NA	NA	NA	NA	NA	NA	NA	NA	NA	NA	NA	NA
GO_INTEGRATOR_COMPLEX	NA	NA	NA	NA	NA	NA	NA	NA	NA	NA	NA	NA	NA	NA	NA	NA	NA	NA	NA	NA	NA	NA	NA	NA	NA	NA	0.0431782	NA	NA	NA	NA	NA	NA	NA	NA	NA	NA	NA	NA	NA	NA	NA	NA	NA	NA	NA	NA	NA	NA
GO_INTEGRIN_ACTIVATION	NA	NA	NA	NA	NA	NA	NA	NA	NA	NA	NA	NA	NA	NA	NA	NA	NA	NA	NA	NA	NA	NA	NA	NA	NA	NA	NA	NA	NA	NA	NA	NA	NA	NA	NA	NA	NA	NA	NA	NA	NA	NA	NA	NA	NA	NA	NA	NA	NA
GO_INTEGRIN_BINDING	NA	NA	NA	NA	NA	NA	NA	NA	NA	NA	NA	NA	NA	NA	0.696746	0.0233786	0.187371	0.01538	NA	NA	NA	NA	NA	NA	NA	NA	0.491985	0.0482076	NA	NA	NA	NA	0.0154908	0.42256	NA	NA	NA	NA	NA	NA	NA	NA	NA	NA	NA	NA	NA	NA	NA
GO_INTEGRIN_MEDIATED_SIGNALING_PATHWAY	NA	NA	0.0119918	NA	NA	NA	NA	NA	NA	NA	NA	NA	NA	NA	0.0349966	0.121817	NA	NA	NA	NA	NA	NA	NA	NA	NA	NA	0.712253	0.0194632	NA	NA	0.720296	0.0231304	NA	NA	NA	NA	0.00325367	0.628743	NA	NA	0.0256596	0.0820283	NA	NA	NA	NA	NA	NA	NA
GO_INTERACTION_WITH_HOST	0.104917	0.030287	NA	NA	NA	NA	NA	NA	NA	NA	NA	NA	NA	NA	0.026539	0.690684	0.845369	0.0380958	NA	NA	NA	NA	NA	NA	NA	NA	NA	NA	NA	NA	NA	NA	NA	NA	NA	NA	NA	NA	NA	NA	NA	NA	NA	NA	NA	NA	NA	NA	NA
GO_INTERACTION_WITH_SYMBIONT	NA	NA	NA	NA	NA	NA	NA	NA	NA	NA	NA	NA	NA	NA	0.00469779	0.651014	NA	NA	0.0324892	0.849044	NA	NA	NA	NA	NA	NA	NA	NA	NA	NA	NA	NA	NA	NA	NA	NA	NA	NA	NA	NA	NA	NA	NA	NA	NA	NA	NA	NA	NA
GO_INTERCALATED_DISC	NA	NA	NA	NA	NA	NA	NA	NA	NA	NA	NA	NA	0.137162	0.0454039	0.0103307	0.112014	NA	0.0131586	NA	NA	NA	NA	0.00781356	NA	NA	NA	NA	NA	NA	NA	NA	NA	NA	NA	NA	NA	NA	NA	NA	NA	NA	NA	NA	NA	NA	NA	NA	NA	NA
GO_INTERCELLULAR_BRIDGE	NA	NA	NA	NA	NA	NA	NA	NA	NA	NA	NA	NA	NA	NA	NA	NA	NA	NA	NA	NA	NA	NA	NA	NA	NA	NA	NA	NA	NA	NA	NA	NA	NA	NA	NA	NA	NA	NA	NA	NA	NA	NA	NA	NA	NA	NA	NA	NA	NA
GO_INTERFERON_ALPHA_PRODUCTION	NA	NA	NA	NA	0.000285909	0.322995	NA	NA	NA	NA	NA	NA	NA	NA	NA	NA	NA	NA	0.405161	0.0164376	NA	NA	NA	NA	NA	NA	NA	0.0268051	NA	NA	NA	NA	NA	0.0295704	NA	NA	NA	NA	NA	NA	0.341941	0.00770876	NA	NA	NA	NA	NA	NA	NA
GO_INTERFERON_BETA_PRODUCTION	NA	NA	0.470667	0.0252137	NA	NA	0.192201	0.0414646	NA	NA	NA	NA	0.721355	0.043216	NA	NA	NA	NA	NA	NA	0.512049	0.00472934	NA	NA	NA	NA	NA	NA	NA	NA	NA	NA	NA	NA	NA	NA	NA	NA	0.0236843	NA	0.539477	0.00689639	0.118454	0.0166231	NA	NA	NA	NA	NA
GO_INTERFERON_GAMMA_MEDIATED_SIGNALING_PATHWAY	NA	NA	NA	NA	NA	NA	NA	NA	0.219412	0.0452157	0.0184906	0.0525442	0.00811984	0.170402	0.451031	0.019352	NA	NA	NA	NA	0.00969006	NA	NA	NA	0.00805984	NA	NA	NA	NA	NA	NA	NA	NA	NA	NA	NA	NA	NA	NA	NA	NA	NA	NA	NA	NA	NA	NA	NA	NA
GO_INTERFERON_GAMMA_PRODUCTION	NA	NA	NA	NA	NA	NA	NA	NA	NA	NA	NA	0.0222315	NA	NA	NA	NA	NA	NA	NA	NA	NA	NA	NA	NA	NA	NA	NA	NA	NA	NA	NA	NA	NA	NA	NA	NA	NA	NA	NA	NA	NA	NA	NA	0.0357878	NA	NA	NA	NA	NA
GO_INTERLEUKIN_1_BETA_PRODUCTION	NA	NA	NA	NA	NA	NA	NA	NA	NA	NA	NA	NA	NA	NA	NA	NA	NA	NA	NA	NA	NA	NA	NA	NA	NA	NA	NA	NA	NA	NA	NA	NA	NA	NA	NA	NA	NA	NA	NA	NA	NA	NA	NA	NA	NA	NA	NA	NA	0.55339
GO_INTERLEUKIN_1_MEDIATED_SIGNALING_PATHWAY	NA	NA	0.3743	0.0416166	NA	NA	0.812793	0.00515926	NA	NA	NA	NA	NA	NA	NA	NA	NA	NA	NA	NA	NA	NA	NA	NA	NA	NA	NA	NA	NA	NA	NA	NA	NA	NA	NA	NA	NA	NA	NA	NA	NA	NA	NA	NA	NA	NA	NA	NA	NA
GO_INTERLEUKIN_1_PRODUCTION	NA	NA	NA	NA	NA	NA	NA	NA	NA	NA	NA	NA	NA	NA	NA	NA	NA	NA	NA	NA	NA	NA	NA	NA	NA	NA	NA	NA	NA	NA	NA	NA	NA	NA	NA	NA	NA	NA	NA	NA	NA	NA	NA	NA	NA	NA	NA	NA	0.601678
GO_INTERLEUKIN_10_PRODUCTION	NA	NA	NA	NA	NA	NA	NA	NA	0.0255987	0.236725	NA	NA	NA	NA	NA	NA	NA	NA	NA	NA	NA	NA	NA	NA	NA	NA	NA	NA	NA	NA	NA	NA	NA	0.0251373	NA	NA	NA	NA	NA	NA	NA	NA	NA	0.00473176	NA	NA	NA	NA	NA
GO_INTERLEUKIN_12_PRODUCTION	NA	0.0397933	NA	NA	NA	NA	NA	NA	NA	NA	NA	NA	NA	NA	NA	NA	NA	NA	NA	NA	NA	NA	NA	NA	NA	NA	NA	NA	NA	NA	NA	NA	NA	NA	NA	NA	NA	NA	NA	NA	NA	NA	NA	0.0235005	NA	NA	NA	NA	NA
GO_INTERLEUKIN_13_PRODUCTION	NA	NA	NA	NA	NA	NA	NA	NA	NA	NA	NA	NA	NA	NA	0.0474584	NA	NA	NA	NA	NA	NA	NA	NA	NA	NA	NA	NA	NA	NA	NA	NA	NA	NA	NA	NA	NA	NA	NA	NA	NA	NA	NA	NA	NA	0.0253195	NA	NA	NA	NA
GO_INTERLEUKIN_2_PRODUCTION	NA	NA	NA	NA	NA	NA	0.584101	0.00946393	NA	NA	NA	NA	NA	NA	NA	NA	NA	NA	NA	NA	NA	NA	NA	NA	NA	NA	NA	NA	NA	NA	NA	NA	NA	NA	NA	NA	NA	NA	NA	NA	NA	NA	NA	NA	NA	NA	NA	NA	NA
GO_INTERLEUKIN_27_MEDIATED_SIGNALING_PATHWAY	NA	NA	NA	NA	NA	NA	NA	NA	NA	NA	NA	NA	NA	NA	NA	NA	NA	NA	NA	NA	NA	NA	NA	NA	0.0179369	NA	NA	NA	NA	NA	NA	NA	NA	NA	NA	NA	NA	NA	NA	NA	NA	NA	NA	NA	NA	NA	NA	NA	NA
GO_INTERLEUKIN_35_MEDIATED_SIGNALING_PATHWAY	NA	NA	NA	NA	NA	NA	NA	NA	NA	NA	NA	NA	NA	NA	NA	NA	NA	NA	NA	NA	NA	NA	NA	NA	0.0179369	NA	NA	NA	NA	NA	NA	NA	NA	NA	NA	NA	NA	NA	NA	NA	NA	NA	NA	NA	NA	NA	NA	NA	NA
GO_INTERLEUKIN_4_PRODUCTION	NA	NA	NA	NA	NA	NA	NA	NA	NA	NA	NA	NA	NA	NA	NA	NA	NA	NA	NA	NA	NA	NA	NA	NA	NA	NA	NA	NA	NA	NA	NA	NA	NA	NA	NA	NA	NA	NA	NA	NA	NA	NA	NA	NA	NA	NA	NA	NA	NA
GO_INTERLEUKIN_5_PRODUCTION	NA	NA	NA	NA	NA	NA	NA	NA	NA	NA	NA	NA	NA	NA	NA	NA	NA	NA	NA	NA	NA	NA	NA	NA	NA	NA	NA	NA	NA	NA	NA	NA	NA	NA	NA	NA	NA	NA	NA	NA	NA	NA	NA	NA	0.0230858	NA	NA	NA	NA
GO_INTERLEUKIN_6_MEDIATED_SIGNALING_PATHWAY	NA	NA	NA	NA	NA	NA	NA	NA	NA	NA	NA	NA	NA	NA	NA	NA	NA	NA	NA	NA	NA	NA	NA	NA	NA	NA	NA	NA	NA	NA	NA	NA	NA	NA	NA	NA	NA	NA	NA	NA	NA	NA	NA	NA	NA	NA	NA	NA	NA
GO_INTERLEUKIN_7_MEDIATED_SIGNALING_PATHWAY	NA	NA	NA	NA	NA	NA	NA	NA	NA	NA	NA	NA	NA	NA	NA	NA	NA	NA	NA	NA	NA	NA	NA	NA	0.112075	0.0303614	NA	NA	NA	NA	NA	NA	NA	NA	NA	NA	NA	NA	NA	NA	NA	NA	NA	NA	NA	NA	NA	NA	NA
GO_INTERMEDIATE_FILAMENT_BASED_PROCESS	NA	0.00283344	NA	NA	NA	NA	NA	NA	NA	NA	NA	NA	NA	NA	NA	NA	0.0450344	0.232946	NA	NA	NA	NA	NA	NA	NA	NA	NA	NA	0.00938231	NA	NA	NA	NA	NA	NA	NA	NA	NA	NA	NA	NA	NA	NA	NA	NA	NA	NA	NA	NA
GO_INTERMEMBRANE_LIPID_TRANSFER	NA	NA	NA	NA	NA	NA	0.157662	0.0299459	NA	NA	NA	NA	NA	NA	NA	NA	NA	NA	NA	NA	NA	NA	NA	NA	NA	NA	NA	NA	0.514031	0.00857149	NA	NA	NA	NA	NA	NA	NA	NA	NA	NA	NA	NA	NA	NA	NA	NA	0.0393573	0.490993	NA
GO_INTERSTITIAL_MATRIX	NA	0.00227649	NA	NA	NA	NA	NA	NA	NA	NA	0.00878531	NA	NA	NA	NA	NA	NA	NA	NA	NA	0.0141911	NA	NA	NA	NA	NA	NA	NA	NA	NA	0.141849	0.00719909	NA	NA	NA	NA	NA	NA	NA	NA	NA	NA	NA	NA	NA	NA	NA	NA	NA
GO_INTERSTRAND_CROSS_LINK_REPAIR	NA	NA	NA	NA	NA	NA	NA	NA	NA	NA	NA	NA	NA	NA	NA	NA	NA	NA	NA	NA	NA	NA	NA	NA	NA	NA	NA	NA	NA	NA	NA	NA	NA	NA	NA	NA	NA	NA	NA	NA	NA	NA	NA	NA	NA	NA	NA	NA	NA
GO_INTESTINAL_ABSORPTION	NA	NA	NA	NA	NA	NA	NA	NA	NA	NA	NA	NA	NA	NA	NA	NA	NA	NA	NA	NA	NA	0.00250416	NA	NA	NA	NA	NA	NA	NA	NA	NA	NA	NA	NA	NA	NA	NA	NA	NA	NA	NA	NA	NA	NA	NA	NA	NA	NA	NA
GO_INTRA_GOLGI_VESICLE_MEDIATED_TRANSPORT	NA	NA	NA	NA	NA	NA	NA	NA	NA	NA	NA	NA	NA	NA	NA	NA	NA	NA	NA	NA	NA	NA	NA	NA	NA	NA	NA	NA	NA	NA	NA	NA	NA	NA	0.0460157	NA	NA	NA	NA	NA	NA	NA	NA	NA	NA	NA	NA	NA	NA
GO_INTRA_S_DNA_DAMAGE_CHECKPOINT	NA	NA	NA	NA	0.0154145	0.206332	NA	NA	NA	NA	NA	NA	NA	NA	NA	NA	NA	NA	NA	NA	NA	NA	NA	NA	NA	NA	NA	NA	NA	NA	NA	NA	NA	NA	NA	NA	NA	NA	NA	NA	0.0245089	NA	NA	NA	NA	NA	NA	NA	NA
GO_INTRACELLULAR_CALCIUM_ACTIVATED_CHLORIDE_CHANNEL_ACTIVITY	NA	NA	NA	NA	NA	NA	NA	NA	NA	NA	NA	NA	NA	NA	NA	NA	NA	NA	NA	NA	NA	NA	NA	NA	NA	NA	NA	NA	NA	NA	NA	NA	0.0110763	NA	NA	NA	NA	NA	NA	NA	NA	NA	NA	NA	NA	NA	NA	NA	NA
GO_INTRACELLULAR_ESTROGEN_RECEPTOR_SIGNALING_PATHWAY	NA	0.0397933	0.161892	0.00580191	NA	NA	NA	NA	NA	NA	NA	NA	NA	NA	NA	NA	NA	NA	NA	NA	NA	NA	NA	NA	0.0235713	0.0951482	NA	NA	NA	NA	0.0290865	NA	NA	NA	NA	NA	NA	NA	0.0302048	NA	NA	NA	0.493622	0.0235005	0.493622	0.0406022	NA	NA	NA
GO_INTRACELLULAR_LIGAND_GATED_ION_CHANNEL_ACTIVITY	NA	NA	NA	NA	NA	NA	NA	NA	NA	NA	NA	NA	NA	NA	0.386861	0.0417785	NA	NA	NA	NA	NA	NA	NA	NA	NA	NA	NA	0.0306268	NA	NA	NA	NA	NA	NA	NA	NA	NA	NA	NA	NA	NA	NA	NA	NA	NA	NA	NA	NA	NA
GO_INTRACELLULAR_LIPID_TRANSPORT	NA	NA	NA	NA	NA	NA	0.163337	0.0317303	NA	NA	NA	NA	0.00530446	0.155975	NA	NA	NA	NA	NA	NA	NA	NA	NA	NA	NA	NA	NA	NA	NA	NA	NA	NA	NA	NA	0.0010839	0.326802	NA	NA	NA	NA	NA	NA	NA	NA	0.0161675	NA	NA	NA	NA
GO_INTRACELLULAR_MRNA_LOCALIZATION	NA	NA	NA	NA	NA	NA	NA	NA	NA	NA	NA	NA	NA	NA	NA	NA	0.014396	NA	NA	NA	NA	NA	NA	NA	NA	NA	NA	NA	NA	NA	NA	NA	NA	NA	NA	NA	NA	NA	NA	NA	NA	NA	0.133323	0.00708769	NA	NA	NA	NA	NA
GO_INTRACELLULAR_RECEPTOR_SIGNALING_PATHWAY	NA	NA	NA	NA	NA	NA	0.0655466	0.0218048	NA	NA	0.0285364	0.231403	0.0370152	0.122828	NA	NA	0.000280784	0.200624	0.00179209	0.781966	0.0364276	0.106126	NA	NA	0.0135404	0.09525	0.0844593	0.000979881	NA	NA	0.0367158	0.126889	0.501964	0.00526768	NA	NA	NA	NA	0.360361	0.0143029	NA	NA	0.206857	0.00236833	0.0960683	0.00948678	NA	NA	NA
GO_INTRACELLULAR_STEROID_HORMONE_RECEPTOR_SIGNALING_PATHWAY	NA	NA	0.431731	0.0159231	NA	NA	0.0112269	0.103863	0.0174235	0.0918637	NA	NA	NA	NA	0.859298	0.0418839	0.000468329	0.0581836	NA	NA	0.0251798	NA	NA	NA	NA	NA	NA	NA	NA	NA	0.00244051	0.688955	NA	NA	NA	NA	NA	NA	0.105662	0.024764	NA	NA	0.400521	0.0367651	0.159038	0.00467019	NA	NA	NA
GO_INTRACELLULAR_STEROL_TRANSPORT	NA	NA	NA	0.0393642	NA	0.049466	NA	NA	NA	NA	NA	NA	0.0242428	NA	NA	NA	NA	NA	NA	NA	NA	NA	NA	NA	NA	NA	NA	NA	NA	NA	NA	NA	NA	NA	0.0260976	NA	NA	0.021567	NA	NA	NA	NA	NA	NA	NA	NA	0.0677655	0.000515925	NA
GO_INTRACILIARY_RETROGRADE_TRANSPORT	NA	NA	NA	NA	NA	NA	NA	NA	NA	NA	0.00628561	NA	NA	NA	NA	NA	0.158632	0.0158864	NA	NA	NA	NA	NA	NA	NA	NA	NA	NA	NA	NA	NA	NA	NA	NA	NA	0.00397026	NA	NA	NA	NA	0.156683	0.011512	NA	NA	NA	NA	NA	NA	NA
GO_INTRACILIARY_TRANSPORT	NA	NA	NA	NA	NA	NA	NA	NA	NA	NA	NA	NA	NA	NA	NA	NA	NA	NA	NA	NA	NA	NA	NA	NA	NA	NA	NA	NA	NA	NA	NA	NA	NA	NA	NA	0.0111773	NA	NA	NA	NA	0.0479433	0.191836	NA	NA	NA	NA	NA	NA	NA
GO_INTRACILIARY_TRANSPORT_INVOLVED_IN_CILIUM_ASSEMBLY	NA	NA	NA	NA	NA	NA	NA	NA	NA	NA	NA	NA	NA	NA	NA	NA	NA	NA	0.0402847	0.556077	NA	NA	NA	NA	0.040832	0.30673	NA	NA	0.0269628	NA	NA	NA	NA	NA	NA	0.00511981	NA	NA	NA	NA	0.0233572	0.122887	NA	NA	NA	NA	NA	NA	NA
GO_INTRACILIARY_TRANSPORT_PARTICLE	NA	NA	NA	NA	NA	NA	NA	NA	NA	NA	NA	NA	NA	NA	NA	NA	NA	NA	0.0142798	0.421886	NA	NA	NA	NA	NA	NA	NA	NA	NA	NA	NA	NA	NA	NA	NA	0.0231245	NA	NA	NA	NA	NA	NA	NA	NA	NA	NA	NA	NA	NA
GO_INTRACILIARY_TRANSPORT_PARTICLE_B	NA	NA	NA	NA	NA	0.0298159	NA	NA	NA	NA	NA	NA	NA	NA	NA	NA	NA	NA	0.049965	0.319915	NA	NA	NA	NA	NA	NA	NA	NA	NA	NA	NA	NA	NA	NA	NA	NA	NA	NA	NA	NA	NA	NA	NA	NA	NA	NA	NA	NA	NA
GO_INTRAMEMBRANE_LIPID_TRANSPORTER_ACTIVITY	NA	NA	NA	NA	NA	NA	0.288858	0.0407945	NA	NA	0.0223207	NA	0.0150945	NA	0.0474584	0.211219	NA	NA	NA	NA	NA	NA	NA	NA	NA	NA	NA	NA	0.0451081	NA	NA	NA	0.191916	0.0183949	NA	NA	NA	NA	NA	NA	NA	0.039804	NA	NA	0.0253195	NA	0.0495854	0.275378	NA
GO_INTRAMOLECULAR_OXIDOREDUCTASE_ACTIVITY	NA	NA	0.131351	0.0252137	NA	NA	0.0464613	NA	NA	NA	NA	NA	NA	NA	NA	NA	NA	NA	NA	NA	NA	NA	NA	NA	NA	NA	NA	NA	NA	NA	NA	NA	NA	NA	NA	NA	NA	NA	NA	NA	NA	NA	NA	NA	NA	NA	NA	NA	NA
GO_INTRAMOLECULAR_OXIDOREDUCTASE_ACTIVITY_TRANSPOSING_C_C_BONDS	NA	NA	NA	NA	NA	NA	0.0206774	NA	NA	NA	NA	NA	NA	NA	NA	NA	NA	NA	NA	NA	NA	NA	NA	NA	0.0285789	NA	NA	NA	NA	NA	NA	NA	NA	NA	NA	NA	NA	NA	NA	NA	NA	NA	NA	NA	NA	NA	NA	NA	NA
GO_INTRAMOLECULAR_TRANSFERASE_ACTIVITY	NA	NA	NA	NA	NA	NA	NA	NA	NA	NA	NA	NA	NA	NA	NA	NA	NA	NA	NA	NA	NA	NA	NA	NA	NA	NA	NA	NA	NA	NA	NA	NA	NA	NA	NA	NA	NA	NA	NA	NA	NA	NA	NA	NA	NA	0.0467645	NA	NA	NA
GO_INTRASPECIES_INTERACTION_BETWEEN_ORGANISMS	NA	NA	NA	NA	NA	NA	NA	NA	NA	NA	NA	NA	NA	0.0499412	NA	NA	NA	NA	NA	NA	NA	NA	NA	NA	NA	NA	NA	NA	NA	NA	NA	NA	NA	NA	NA	NA	NA	NA	NA	NA	0.0479433	0.555508	NA	NA	NA	NA	NA	NA	NA
GO_INTRINSIC_APOPTOTIC_SIGNALING_PATHWAY	0.036625	NA	0.49972	8.61258e-05	NA	NA	0.324893	0.0358974	NA	NA	NA	NA	NA	NA	NA	NA	NA	NA	NA	NA	0.121227	0.0476876	0.0288957	0.162465	NA	NA	0.00633557	0.519834	0.00811249	0.527147	NA	NA	NA	NA	NA	NA	NA	NA	NA	NA	NA	NA	NA	NA	NA	NA	NA	NA	NA
GO_INTRINSIC_APOPTOTIC_SIGNALING_PATHWAY_BY_P53_CLASS_MEDIATOR	0.0282821	NA	NA	NA	NA	NA	NA	NA	NA	NA	NA	NA	NA	NA	NA	NA	NA	NA	NA	NA	0.00510218	NA	0.0244422	NA	0.016924	0.510838	0.00200498	0.524619	NA	NA	NA	NA	NA	NA	NA	NA	NA	NA	NA	NA	NA	0.0308043	NA	NA	NA	NA	NA	NA	NA
GO_INTRINSIC_APOPTOTIC_SIGNALING_PATHWAY_IN_RESPONSE_TO_DNA_DAMAGE	0.0113063	NA	0.730789	0.00196479	NA	NA	0.230636	0.0214189	NA	NA	NA	NA	NA	NA	NA	NA	NA	NA	0.0470718	0.153097	NA	NA	NA	NA	0.0479791	0.611268	0.0306035	0.2551	NA	NA	NA	NA	NA	NA	NA	NA	NA	NA	NA	NA	NA	NA	NA	NA	NA	NA	NA	NA	NA
GO_INTRINSIC_APOPTOTIC_SIGNALING_PATHWAY_IN_RESPONSE_TO_DNA_DAMAGE_BY_P53_CLASS_MEDIATOR	0.00644884	NA	0.435858	0.0191079	NA	NA	NA	NA	NA	0.0283118	NA	NA	NA	NA	NA	NA	NA	NA	0.0104257	0.228372	0.0260678	NA	NA	NA	0.0106195	0.337796	0.0147123	0.348614	NA	NA	NA	NA	NA	NA	NA	NA	NA	NA	NA	NA	NA	0.0306562	NA	NA	NA	NA	NA	NA	NA
GO_INTRINSIC_APOPTOTIC_SIGNALING_PATHWAY_IN_RESPONSE_TO_ENDOPLASMIC_RETICULUM_STRESS	NA	NA	NA	0.0453938	NA	NA	NA	NA	NA	NA	NA	NA	NA	NA	NA	NA	NA	NA	NA	NA	NA	NA	NA	NA	NA	NA	NA	NA	NA	NA	NA	NA	NA	NA	NA	NA	NA	NA	NA	NA	NA	NA	NA	NA	NA	NA	NA	NA	NA
GO_INTRINSIC_APOPTOTIC_SIGNALING_PATHWAY_IN_RESPONSE_TO_OXIDATIVE_STRESS	NA	NA	0.102397	0.0169254	NA	NA	NA	NA	0.00697853	0.47129	NA	NA	NA	NA	NA	NA	NA	NA	NA	NA	NA	NA	NA	NA	NA	NA	NA	NA	NA	NA	NA	NA	NA	NA	NA	NA	NA	NA	NA	NA	0.0282162	NA	NA	NA	NA	NA	NA	NA	NA
GO_INTRINSIC_COMPONENT_OF_ENDOPLASMIC_RETICULUM_MEMBRANE	NA	NA	NA	NA	NA	NA	NA	NA	NA	NA	NA	NA	NA	NA	0.145953	0.00275111	NA	NA	0.0143903	0.427955	NA	NA	NA	NA	0.004783	0.782445	NA	NA	NA	NA	NA	NA	NA	NA	NA	NA	NA	NA	NA	NA	NA	NA	NA	NA	NA	NA	NA	NA	NA
GO_INTRINSIC_COMPONENT_OF_EXTERNAL_SIDE_OF_PLASMA_MEMBRANE	NA	NA	NA	NA	NA	NA	NA	NA	NA	NA	NA	NA	NA	NA	NA	NA	NA	NA	NA	NA	NA	NA	NA	NA	NA	NA	NA	NA	NA	NA	NA	NA	NA	NA	NA	NA	NA	NA	NA	NA	NA	NA	NA	NA	NA	NA	NA	NA	NA
GO_INTRINSIC_COMPONENT_OF_MITOCHONDRIAL_INNER_MEMBRANE	NA	NA	NA	NA	NA	NA	NA	NA	0.222486	0.0370853	NA	NA	NA	NA	NA	NA	0.544299	0.0122963	NA	NA	NA	NA	NA	NA	0.00261698	0.367477	0.111718	0.00127566	NA	NA	NA	NA	NA	NA	NA	NA	NA	NA	0.0236843	0.236736	NA	NA	NA	NA	NA	NA	NA	NA	NA
GO_INTRINSIC_COMPONENT_OF_MITOCHONDRIAL_MEMBRANE	NA	NA	0.648005	0.0201477	NA	NA	0.736365	0.0376107	NA	NA	0.0627863	0.0406471	NA	NA	NA	NA	0.366052	0.000111882	0.0201522	0.227528	NA	NA	0.481832	0.000334773	0.0205748	0.171614	0.241161	0.00766803	NA	NA	NA	0.00920605	0.200635	0.00920605	NA	NA	NA	NA	0.00705009	0.358161	0.0376107	0.128361	NA	NA	NA	NA	NA	NA	NA
GO_INTRINSIC_COMPONENT_OF_MITOCHONDRIAL_OUTER_MEMBRANE	NA	NA	NA	0.00330771	NA	NA	NA	NA	NA	NA	NA	NA	NA	NA	NA	NA	0.314073	0.00878274	NA	NA	NA	NA	0.174805	0.000687788	NA	NA	NA	NA	NA	NA	NA	NA	0.216159	0.023709	NA	NA	NA	NA	NA	NA	NA	NA	NA	NA	NA	NA	NA	NA	NA
GO_INTRINSIC_COMPONENT_OF_NUCLEAR_INNER_MEMBRANE	NA	NA	NA	NA	NA	NA	0.0236083	NA	NA	NA	NA	NA	NA	NA	NA	NA	NA	NA	NA	NA	NA	NA	NA	NA	NA	NA	NA	NA	NA	NA	NA	NA	NA	NA	NA	NA	NA	NA	NA	NA	NA	NA	0.0132619	NA	NA	NA	NA	NA	NA
GO_INTRINSIC_COMPONENT_OF_ORGANELLE_MEMBRANE	NA	NA	0.962598	0.0303284	NA	NA	NA	NA	NA	NA	NA	NA	NA	NA	0.0718874	0.00187711	0.0944407	0.00238144	0.0209248	0.179077	NA	NA	0.829201	0.0269349	0.000712253	0.491995	NA	NA	NA	NA	NA	NA	NA	NA	NA	NA	NA	NA	NA	NA	NA	NA	NA	NA	NA	NA	NA	NA	NA
GO_INTRINSIC_COMPONENT_OF_PEROXISOMAL_MEMBRANE	NA	NA	NA	NA	NA	NA	NA	NA	NA	NA	NA	NA	NA	NA	NA	0.0119696	NA	NA	NA	NA	NA	NA	NA	NA	NA	NA	NA	NA	NA	NA	NA	NA	NA	NA	NA	NA	NA	NA	NA	NA	NA	NA	NA	NA	NA	NA	NA	NA	NA
GO_INTRINSIC_COMPONENT_OF_PRESYNAPTIC_ACTIVE_ZONE_MEMBRANE	NA	NA	NA	NA	NA	NA	NA	NA	NA	NA	0.01844	NA	NA	0.0349406	NA	NA	0.258001	0.044961	NA	0.00612797	NA	NA	NA	NA	NA	NA	NA	NA	NA	NA	NA	NA	NA	NA	NA	NA	NA	NA	NA	NA	NA	NA	NA	NA	NA	NA	NA	NA	NA
GO_INTRONIC_TRANSCRIPTION_REGULATORY_REGION_SEQUENCE_SPECIFIC_DNA_BINDING	NA	NA	NA	NA	NA	NA	NA	NA	NA	NA	NA	NA	NA	NA	NA	NA	NA	NA	NA	NA	NA	NA	NA	NA	NA	NA	NA	NA	NA	NA	NA	NA	NA	NA	NA	NA	NA	NA	NA	NA	NA	NA	NA	NA	NA	NA	NA	NA	NA
GO_INVADOPODIUM	NA	NA	NA	NA	NA	NA	NA	NA	NA	NA	NA	NA	NA	NA	NA	NA	NA	NA	NA	NA	NA	NA	NA	NA	NA	NA	NA	NA	NA	NA	NA	NA	NA	NA	NA	NA	NA	NA	NA	NA	NA	NA	NA	NA	NA	NA	NA	NA	NA
GO_ION_CHANNEL_BINDING	NA	NA	NA	NA	NA	NA	0.00556583	NA	NA	NA	NA	NA	0.0498276	0.0564024	0.00171359	0.0617322	0.612063	0.00267118	0.46138	0.0173107	0.562744	0.012511	NA	NA	NA	NA	NA	NA	NA	NA	NA	NA	NA	NA	NA	NA	NA	NA	NA	NA	NA	NA	NA	NA	NA	NA	0.0262457	0.325541	NA
GO_ION_CHANNEL_REGULATOR_ACTIVITY	NA	NA	NA	NA	NA	NA	NA	NA	NA	NA	NA	NA	NA	NA	NA	NA	NA	NA	NA	NA	NA	0.0472618	NA	NA	NA	NA	NA	NA	NA	0.0275827	NA	NA	NA	NA	NA	NA	NA	NA	NA	NA	NA	NA	NA	NA	NA	NA	NA	NA	NA
GO_IONOTROPIC_GLUTAMATE_RECEPTOR_ACTIVITY	NA	NA	NA	NA	NA	NA	NA	NA	NA	NA	NA	NA	NA	0.0349406	NA	NA	NA	0.044961	NA	NA	NA	NA	NA	NA	NA	NA	NA	NA	NA	NA	NA	NA	NA	NA	NA	NA	NA	NA	NA	NA	NA	NA	NA	NA	NA	NA	NA	NA	NA
GO_IONOTROPIC_GLUTAMATE_RECEPTOR_SIGNALING_PATHWAY	NA	NA	NA	NA	NA	NA	NA	NA	NA	NA	NA	NA	NA	0.00752916	NA	NA	NA	0.0109886	NA	NA	NA	NA	NA	NA	NA	NA	NA	NA	NA	NA	NA	NA	NA	NA	NA	NA	NA	NA	NA	NA	NA	NA	NA	NA	NA	NA	NA	NA	NA
GO_IRE1_MEDIATED_UNFOLDED_PROTEIN_RESPONSE	NA	NA	NA	NA	NA	NA	NA	NA	NA	NA	NA	NA	NA	NA	0.101764	0.039588	NA	NA	0.135472	0.0456634	NA	NA	NA	NA	NA	NA	NA	NA	NA	NA	NA	NA	NA	NA	NA	NA	NA	NA	NA	NA	NA	NA	NA	NA	NA	NA	NA	NA	NA
GO_IRES_DEPENDENT_VIRAL_TRANSLATIONAL_INITIATION	NA	NA	NA	NA	NA	NA	NA	0.00976468	NA	NA	NA	NA	NA	NA	NA	NA	NA	NA	NA	NA	NA	NA	NA	NA	NA	NA	NA	NA	NA	NA	NA	NA	NA	NA	NA	NA	NA	NA	NA	NA	NA	NA	NA	NA	NA	NA	NA	NA	NA
GO_IRON_ION_TRANSPORT	NA	NA	NA	NA	NA	NA	NA	NA	NA	NA	NA	NA	NA	NA	NA	NA	NA	NA	NA	NA	NA	NA	NA	NA	NA	NA	NA	NA	NA	NA	NA	NA	NA	NA	NA	NA	NA	NA	NA	NA	NA	NA	NA	NA	NA	NA	0.0467035	NA	NA
GO_IRON_SULFUR_CLUSTER_ASSEMBLY	NA	NA	NA	NA	NA	NA	NA	NA	NA	NA	NA	NA	NA	NA	NA	NA	NA	NA	NA	NA	NA	NA	NA	NA	NA	NA	NA	NA	NA	NA	NA	NA	NA	NA	NA	0.0170516	NA	NA	NA	NA	NA	NA	NA	NA	NA	NA	NA	NA	NA
GO_ISOPEPTIDASE_ACTIVITY	NA	NA	NA	0.0190586	NA	NA	NA	NA	NA	NA	NA	NA	NA	NA	NA	NA	NA	NA	NA	NA	NA	NA	NA	NA	NA	NA	NA	NA	NA	NA	NA	NA	NA	NA	NA	NA	0.0104771	NA	NA	NA	NA	0.0268171	NA	NA	NA	NA	NA	NA	NA
GO_ISOPRENOID_BIOSYNTHETIC_PROCESS	NA	NA	0.0483973	0.29955	NA	NA	NA	NA	NA	NA	NA	NA	NA	NA	NA	0.039181	NA	NA	NA	NA	NA	NA	NA	NA	NA	NA	NA	NA	NA	NA	NA	NA	NA	NA	NA	NA	NA	NA	NA	NA	NA	NA	NA	NA	0.0431852	0.313809	NA	NA	NA
GO_ISWI_TYPE_COMPLEX	NA	NA	0.00810037	NA	NA	NA	NA	NA	NA	NA	0.00628561	NA	NA	NA	NA	NA	NA	NA	NA	NA	NA	NA	NA	NA	NA	NA	NA	NA	NA	NA	NA	NA	NA	NA	NA	NA	NA	NA	NA	NA	NA	NA	NA	NA	NA	NA	NA	NA	NA
GO_JNK_CASCADE	NA	NA	NA	NA	NA	NA	NA	NA	NA	NA	NA	NA	NA	NA	NA	NA	NA	NA	NA	NA	NA	NA	NA	NA	NA	NA	0.0360768	0.601387	NA	NA	NA	NA	NA	NA	NA	NA	NA	NA	NA	NA	NA	NA	NA	NA	NA	NA	NA	NA	NA
GO_JUXTAPARANODE_REGION_OF_AXON	NA	NA	NA	NA	0.00606052	NA	NA	NA	NA	NA	NA	NA	NA	NA	NA	NA	NA	NA	NA	NA	NA	NA	NA	NA	NA	NA	NA	NA	0.0108653	NA	NA	NA	NA	NA	NA	NA	NA	NA	NA	NA	NA	NA	NA	NA	NA	NA	NA	NA	NA
GO_K63_LINKED_POLYUBIQUITIN_MODIFICATION_DEPENDENT_PROTEIN_BINDING	NA	NA	NA	NA	NA	NA	NA	NA	NA	NA	NA	NA	0.415077	0.0420458	NA	NA	NA	NA	NA	NA	NA	NA	0.011997	NA	0.00716766	NA	NA	NA	NA	NA	NA	NA	NA	NA	NA	NA	NA	NA	NA	NA	NA	NA	NA	NA	NA	NA	NA	NA	NA
GO_KERATINOCYTE_DIFFERENTIATION	NA	NA	NA	NA	NA	NA	NA	NA	NA	NA	NA	NA	NA	NA	NA	NA	NA	NA	NA	NA	NA	NA	NA	NA	NA	NA	NA	NA	NA	NA	NA	NA	NA	NA	NA	NA	NA	NA	NA	NA	NA	NA	NA	NA	NA	NA	0.968876	0.0451963	NA
GO_KERATINOCYTE_MIGRATION	NA	NA	NA	NA	NA	NA	NA	NA	NA	NA	NA	NA	NA	NA	NA	NA	NA	NA	NA	NA	NA	NA	NA	NA	NA	NA	NA	NA	NA	NA	NA	NA	NA	NA	NA	NA	NA	NA	NA	NA	0.255029	0.0330579	NA	NA	NA	NA	NA	NA	NA
GO_KIDNEY_EPITHELIUM_DEVELOPMENT	NA	NA	NA	NA	NA	NA	NA	NA	NA	NA	NA	NA	NA	NA	NA	NA	NA	NA	NA	NA	0.0161397	0.620696	NA	NA	NA	NA	NA	NA	NA	NA	0.00655924	0.415661	NA	NA	NA	NA	NA	NA	NA	NA	NA	NA	NA	NA	NA	NA	NA	NA	NA
GO_KIDNEY_MORPHOGENESIS	NA	NA	NA	NA	NA	NA	NA	NA	NA	NA	NA	NA	NA	NA	NA	NA	NA	NA	NA	NA	0.0452754	NA	NA	NA	NA	NA	NA	NA	NA	NA	0.0245323	0.611628	NA	NA	NA	NA	NA	NA	NA	NA	NA	NA	NA	NA	NA	NA	NA	NA	NA
GO_KILLING_OF_CELLS_OF_OTHER_ORGANISM	NA	NA	NA	NA	NA	NA	NA	NA	NA	NA	NA	NA	NA	NA	NA	NA	NA	NA	NA	NA	NA	NA	NA	NA	NA	NA	NA	NA	NA	NA	NA	NA	NA	NA	NA	NA	NA	NA	NA	NA	NA	NA	NA	NA	NA	NA	NA	NA	NA
GO_KINASE_ACTIVATOR_ACTIVITY	NA	NA	NA	NA	NA	NA	NA	NA	0.00506064	0.733046	NA	NA	NA	NA	NA	NA	0.0127137	0.214941	0.240418	0.0335213	0.0382627	NA	NA	NA	NA	NA	NA	NA	NA	NA	NA	NA	NA	NA	0.0611978	0.0432171	NA	NA	NA	NA	NA	NA	NA	NA	NA	NA	0.452203	0.0469221	NA
GO_KINASE_INHIBITOR_ACTIVITY	NA	NA	NA	NA	NA	NA	NA	NA	0.0342405	NA	0.041162	NA	NA	NA	NA	NA	NA	NA	NA	NA	NA	NA	NA	NA	NA	NA	NA	NA	NA	NA	NA	NA	NA	NA	NA	NA	NA	NA	0.0428072	NA	NA	NA	NA	NA	NA	NA	NA	NA	NA
GO_KINASE_REGULATOR_ACTIVITY	NA	NA	NA	NA	0.0157224	0.37454	0.678493	0.0498813	0.0153334	0.212899	NA	NA	NA	NA	NA	NA	NA	NA	NA	NA	0.0353573	0.431536	NA	NA	NA	NA	NA	NA	NA	NA	NA	NA	NA	NA	0.0225706	0.292978	NA	NA	0.00372783	0.324232	NA	NA	NA	NA	NA	NA	NA	NA	NA
GO_KINESIN_BINDING	NA	NA	NA	NA	NA	NA	NA	NA	NA	NA	NA	NA	0.666702	0.0294455	NA	NA	NA	NA	NA	NA	NA	NA	NA	NA	0.0489332	NA	NA	NA	NA	NA	NA	NA	NA	NA	NA	NA	NA	NA	NA	NA	NA	NA	NA	NA	NA	NA	NA	NA	NA
GO_KINESIN_COMPLEX	NA	NA	NA	NA	NA	NA	NA	NA	NA	NA	NA	NA	0.0392761	0.552617	NA	NA	NA	NA	NA	NA	NA	NA	NA	NA	NA	NA	NA	NA	NA	NA	NA	NA	NA	NA	NA	NA	NA	NA	NA	NA	NA	NA	NA	NA	NA	NA	NA	NA	NA
GO_KINETOCHORE	NA	NA	NA	NA	NA	0.0141937	NA	NA	0.0356244	0.869387	NA	NA	0.0228644	0.167254	0.0277259	0.456561	NA	NA	NA	NA	NA	NA	NA	NA	NA	NA	NA	NA	0.18396	0.0428255	NA	NA	NA	NA	0.160973	0.00713183	NA	NA	NA	NA	NA	NA	NA	NA	NA	NA	NA	NA	NA
GO_KINETOCHORE_ASSEMBLY	0.00884927	NA	NA	NA	NA	NA	NA	NA	NA	NA	NA	NA	NA	NA	NA	NA	NA	NA	NA	NA	NA	NA	NA	NA	NA	NA	NA	0.0110472	NA	NA	NA	NA	NA	NA	NA	NA	NA	NA	NA	NA	NA	NA	NA	NA	NA	NA	NA	NA	NA
GO_KINETOCHORE_ORGANIZATION	0.0146225	NA	NA	NA	NA	NA	NA	NA	NA	NA	NA	NA	NA	NA	NA	NA	NA	NA	NA	NA	NA	NA	NA	NA	NA	NA	NA	0.0181927	NA	NA	NA	NA	NA	NA	NA	NA	NA	NA	NA	NA	NA	NA	NA	NA	NA	NA	NA	NA	NA
GO_L_ALANINE_TRANSPORT	NA	NA	NA	NA	NA	NA	NA	NA	NA	NA	NA	NA	NA	NA	NA	NA	NA	NA	NA	NA	NA	NA	NA	NA	NA	NA	NA	NA	NA	NA	NA	NA	NA	NA	NA	NA	NA	NA	NA	NA	NA	NA	NA	NA	NA	NA	NA	NA	NA
GO_L_ALPHA_AMINO_ACID_TRANSMEMBRANE_TRANSPORT	NA	NA	NA	NA	NA	NA	NA	NA	NA	NA	NA	NA	NA	NA	NA	NA	NA	NA	NA	NA	NA	NA	NA	NA	NA	NA	NA	NA	NA	NA	NA	NA	NA	NA	NA	NA	NA	NA	NA	NA	NA	NA	NA	NA	NA	NA	NA	NA	NA
GO_L_AMINO_ACID_TRANSMEMBRANE_TRANSPORTER_ACTIVITY	NA	NA	NA	NA	NA	NA	NA	NA	0.0872452	0.00173324	NA	NA	NA	NA	NA	NA	NA	NA	NA	NA	NA	NA	NA	NA	NA	NA	NA	NA	NA	NA	NA	NA	NA	NA	NA	NA	NA	NA	NA	NA	NA	NA	NA	NA	0.00525206	0.548053	NA	NA	NA
GO_L_AMINO_ACID_TRANSPORT	NA	NA	NA	NA	NA	NA	0.694738	0.0260126	0.140115	0.02253	NA	NA	NA	NA	NA	NA	NA	NA	NA	NA	NA	NA	NA	NA	NA	NA	NA	NA	NA	NA	NA	NA	NA	NA	NA	NA	NA	NA	NA	NA	NA	NA	NA	NA	NA	NA	NA	NA	NA
GO_L_ARGININE_TRANSPORT	NA	NA	NA	NA	0.00606052	NA	NA	NA	NA	NA	NA	NA	NA	NA	NA	NA	NA	NA	NA	NA	NA	NA	NA	NA	NA	NA	NA	NA	NA	NA	NA	NA	NA	NA	NA	NA	NA	NA	NA	NA	NA	NA	NA	NA	NA	NA	NA	NA	NA
GO_L_ASCORBIC_ACID_BINDING	NA	NA	NA	NA	NA	NA	NA	NA	NA	NA	NA	NA	NA	NA	NA	NA	NA	NA	NA	NA	NA	NA	NA	NA	NA	NA	NA	NA	NA	NA	NA	NA	0.18367	0.0167518	NA	NA	NA	NA	NA	NA	NA	NA	NA	NA	NA	0.0287993	NA	NA	NA
GO_L_ASCORBIC_ACID_METABOLIC_PROCESS	NA	NA	NA	NA	NA	NA	NA	NA	NA	NA	NA	NA	0.0299857	NA	NA	NA	NA	NA	NA	NA	NA	NA	NA	NA	NA	NA	0.00668999	NA	NA	NA	NA	NA	NA	NA	NA	NA	NA	NA	NA	NA	0.0118144	NA	NA	NA	NA	NA	NA	NA	NA
GO_L_GLUTAMATE_TRANSMEMBRANE_TRANSPORT	NA	NA	NA	NA	NA	0.0424986	NA	NA	NA	NA	NA	NA	NA	NA	NA	NA	NA	NA	NA	NA	NA	NA	NA	NA	NA	NA	NA	NA	NA	NA	NA	NA	NA	NA	NA	NA	NA	NA	NA	NA	NA	NA	NA	NA	NA	NA	NA	NA	NA
GO_L_SERINE_METABOLIC_PROCESS	NA	NA	NA	NA	NA	NA	NA	0.0140346	NA	NA	NA	NA	NA	NA	NA	NA	NA	NA	NA	NA	NA	NA	NA	NA	NA	NA	NA	NA	NA	NA	NA	NA	NA	NA	NA	NA	NA	NA	NA	NA	NA	NA	NA	NA	NA	NA	0.0172348	NA	NA
GO_L_TYPE_VOLTAGE_GATED_CALCIUM_CHANNEL_COMPLEX	NA	NA	NA	NA	NA	NA	NA	NA	NA	NA	NA	NA	NA	NA	NA	NA	NA	NA	NA	NA	NA	NA	NA	NA	NA	NA	0.00796783	NA	NA	NA	NA	NA	NA	NA	NA	NA	NA	NA	NA	NA	NA	NA	NA	NA	NA	NA	NA	NA	NA
GO_LABYRINTHINE_LAYER_BLOOD_VESSEL_DEVELOPMENT	NA	NA	NA	NA	NA	NA	NA	NA	NA	NA	NA	NA	NA	NA	NA	NA	NA	NA	NA	NA	NA	NA	NA	NA	NA	NA	NA	NA	NA	NA	NA	NA	NA	NA	NA	NA	NA	NA	NA	NA	NA	NA	NA	NA	NA	NA	NA	NA	NA
GO_LABYRINTHINE_LAYER_DEVELOPMENT	NA	NA	NA	NA	NA	NA	NA	NA	NA	NA	NA	NA	NA	NA	NA	NA	NA	NA	NA	NA	NA	NA	NA	NA	NA	NA	NA	NA	NA	NA	NA	NA	NA	NA	NA	NA	NA	NA	NA	NA	NA	NA	NA	NA	NA	NA	NA	NA	NA
GO_LACTATE_METABOLIC_PROCESS	NA	NA	NA	NA	NA	NA	NA	NA	0.235646	0.0199195	NA	NA	NA	0.022349	NA	NA	NA	NA	NA	NA	NA	NA	NA	NA	NA	NA	NA	NA	NA	NA	NA	NA	NA	NA	NA	NA	NA	NA	NA	NA	NA	NA	NA	NA	NA	NA	NA	NA	NA
GO_LACTATION	NA	0.0301663	0.0239182	0.463881	NA	NA	NA	NA	NA	NA	NA	NA	NA	NA	NA	NA	NA	NA	NA	NA	0.0324817	NA	0.324656	0.0497407	NA	NA	NA	NA	NA	NA	NA	NA	NA	NA	NA	NA	NA	NA	NA	NA	NA	NA	NA	NA	0.114572	0.0276107	NA	NA	NA
GO_LAMELLIPODIUM	NA	NA	0.467432	0.0426328	NA	NA	NA	NA	NA	NA	NA	NA	0.0688707	0.00128664	NA	NA	0.823335	0.010672	0.00530974	0.0505157	NA	NA	NA	NA	NA	NA	0.902118	0.0426583	0.412894	0.00328416	0.0311186	0.142355	NA	NA	0.146152	0.00198037	NA	NA	0.248254	0.0233333	NA	NA	0.0102382	0.171755	NA	NA	NA	NA	NA
GO_LAMELLIPODIUM_ASSEMBLY	NA	NA	NA	NA	NA	NA	NA	NA	NA	NA	NA	NA	0.00780228	0.293276	NA	NA	NA	NA	NA	NA	NA	NA	NA	NA	NA	NA	NA	NA	NA	NA	0.0470929	0.151283	NA	NA	NA	NA	NA	NA	NA	NA	NA	NA	0.0486384	NA	NA	NA	NA	NA	NA
GO_LAMELLIPODIUM_MEMBRANE	NA	NA	NA	NA	NA	NA	NA	NA	NA	NA	NA	NA	NA	NA	NA	NA	NA	NA	NA	NA	NA	NA	NA	NA	NA	NA	NA	NA	NA	NA	NA	NA	NA	NA	NA	0.0156578	NA	NA	NA	NA	NA	NA	NA	NA	NA	NA	NA	NA	NA
GO_LAMELLIPODIUM_MORPHOGENESIS	NA	NA	NA	NA	NA	NA	NA	NA	NA	NA	NA	NA	NA	NA	NA	NA	0.234313	0.0366047	NA	NA	NA	NA	NA	NA	NA	NA	NA	NA	NA	NA	NA	NA	NA	NA	NA	NA	NA	NA	NA	NA	NA	NA	NA	NA	NA	NA	0.254591	0.026987	NA
GO_LAMELLIPODIUM_ORGANIZATION	NA	NA	NA	NA	NA	NA	NA	NA	NA	NA	NA	NA	0.0225957	0.155262	NA	NA	NA	NA	NA	NA	NA	NA	NA	NA	NA	NA	NA	NA	NA	NA	NA	NA	NA	NA	NA	NA	NA	NA	NA	NA	NA	NA	0.0199001	NA	NA	NA	NA	NA	NA
GO_LAMIN_BINDING	NA	NA	NA	0.016956	NA	NA	0.0266982	0.219566	NA	NA	NA	0.00940097	NA	NA	NA	NA	NA	NA	NA	0.0400757	NA	NA	NA	NA	NA	NA	NA	NA	NA	NA	NA	NA	NA	NA	NA	NA	NA	NA	NA	NA	NA	NA	NA	NA	NA	NA	0.24159	0.0240501	0.114308
GO_LAMININ_BINDING	NA	NA	NA	NA	NA	NA	NA	NA	NA	NA	NA	NA	NA	NA	NA	NA	NA	NA	NA	NA	NA	NA	NA	NA	NA	NA	NA	NA	NA	NA	0.289221	0.0337638	NA	NA	NA	NA	NA	NA	NA	NA	0.0728436	0.00941834	NA	NA	NA	NA	NA	NA	NA
GO_LARGE_RIBOSOMAL_SUBUNIT	0.016843	NA	NA	NA	NA	NA	NA	NA	NA	NA	NA	NA	NA	NA	NA	NA	NA	NA	0.00679895	0.905561	NA	NA	NA	NA	NA	NA	NA	NA	NA	NA	NA	NA	NA	NA	NA	NA	NA	NA	NA	NA	NA	NA	NA	NA	NA	NA	NA	NA	NA
GO_LATE_ENDOSOME	NA	NA	NA	NA	NA	NA	0.291203	0.028518	NA	NA	NA	NA	NA	NA	NA	NA	NA	NA	NA	NA	NA	NA	NA	NA	NA	NA	NA	NA	NA	NA	NA	NA	NA	NA	NA	NA	NA	NA	NA	NA	NA	NA	NA	NA	0.642857	0.0043165	NA	NA	NA
GO_LATE_ENDOSOME_MEMBRANE	NA	NA	NA	NA	NA	NA	NA	NA	NA	NA	NA	NA	NA	NA	NA	NA	NA	NA	NA	NA	NA	NA	NA	NA	NA	NA	NA	NA	NA	NA	NA	NA	NA	NA	0.413761	0.0346411	NA	0.0392819	NA	NA	NA	NA	NA	NA	NA	NA	NA	NA	NA
GO_LATERAL_MESODERM_DEVELOPMENT	NA	NA	NA	NA	NA	NA	NA	NA	NA	NA	NA	NA	NA	NA	NA	NA	NA	NA	NA	NA	NA	NA	NA	NA	NA	NA	NA	NA	NA	NA	NA	NA	NA	NA	NA	NA	NA	NA	NA	NA	NA	NA	NA	NA	NA	NA	0.0265101	0.205498	NA
GO_LATERAL_PLASMA_MEMBRANE	NA	NA	NA	NA	NA	NA	NA	NA	NA	NA	0.161987	0.0224442	NA	NA	NA	NA	NA	NA	0.714012	0.00980677	NA	NA	NA	NA	NA	NA	NA	NA	NA	NA	NA	NA	NA	NA	NA	NA	NA	NA	NA	NA	NA	NA	NA	NA	NA	NA	0.306257	0.0171982	NA
GO_LATERAL_VENTRICLE_DEVELOPMENT	NA	NA	NA	NA	NA	NA	NA	NA	NA	NA	NA	NA	NA	NA	NA	NA	NA	NA	NA	NA	NA	NA	NA	NA	NA	NA	NA	NA	NA	NA	NA	NA	NA	NA	NA	NA	NA	NA	NA	NA	NA	NA	NA	NA	NA	NA	NA	NA	NA
GO_LAYER_FORMATION_IN_CEREBRAL_CORTEX	NA	NA	NA	NA	NA	NA	NA	NA	NA	NA	NA	NA	0.0353922	NA	NA	NA	NA	NA	NA	NA	NA	NA	NA	NA	NA	NA	NA	NA	NA	NA	NA	NA	NA	NA	NA	NA	NA	NA	NA	NA	NA	NA	NA	NA	NA	NA	NA	NA	NA
GO_LEADING_EDGE_MEMBRANE	NA	NA	NA	NA	0.350883	0.0406235	NA	NA	NA	NA	NA	NA	0.646544	0.000443145	NA	NA	0.290813	0.00445667	NA	NA	NA	NA	NA	NA	NA	NA	NA	NA	NA	NA	NA	NA	NA	NA	NA	0.00444564	NA	NA	NA	NA	0.753213	0.0175629	0.61652	0.0410866	NA	NA	0.000223203	0.276694	NA
GO_LEARNED_VOCALIZATION_BEHAVIOR_OR_VOCAL_LEARNING	NA	NA	NA	NA	NA	NA	0.0106672	NA	NA	NA	NA	NA	NA	NA	NA	NA	NA	NA	NA	NA	NA	NA	NA	NA	NA	NA	NA	NA	NA	NA	NA	NA	NA	NA	NA	NA	NA	NA	NA	NA	NA	NA	NA	NA	NA	NA	NA	NA	NA
GO_LEARNING	NA	NA	NA	NA	NA	NA	NA	NA	NA	NA	NA	NA	NA	NA	NA	NA	NA	NA	NA	NA	NA	NA	NA	NA	NA	NA	NA	NA	NA	NA	NA	NA	NA	NA	NA	NA	NA	NA	NA	NA	NA	NA	NA	NA	NA	NA	NA	NA	NA
GO_LEFT_RIGHT_AXIS_SPECIFICATION	NA	NA	NA	NA	NA	NA	NA	NA	NA	NA	0.144398	0.00721613	NA	NA	NA	NA	NA	NA	0.0282936	0.247266	NA	NA	NA	NA	NA	NA	NA	NA	NA	NA	NA	NA	NA	NA	NA	0.00645686	NA	NA	NA	NA	NA	NA	NA	NA	NA	NA	NA	NA	NA
GO_LEFT_RIGHT_PATTERN_FORMATION	NA	NA	NA	NA	NA	NA	NA	NA	NA	NA	NA	NA	NA	NA	NA	NA	0.0455111	0.328902	0.00806269	0.360102	NA	NA	NA	NA	NA	NA	NA	NA	NA	NA	NA	NA	NA	NA	NA	0.0156578	NA	NA	NA	NA	NA	NA	NA	NA	NA	NA	NA	NA	NA
GO_LENS_DEVELOPMENT_IN_CAMERA_TYPE_EYE	NA	NA	NA	NA	NA	NA	NA	NA	NA	0.0339959	NA	NA	NA	NA	NA	NA	NA	NA	NA	NA	NA	NA	NA	NA	NA	NA	NA	NA	NA	NA	NA	NA	NA	NA	NA	NA	NA	NA	NA	NA	NA	NA	NA	NA	NA	NA	NA	NA	NA
GO_LENS_MORPHOGENESIS_IN_CAMERA_TYPE_EYE	NA	NA	NA	NA	NA	NA	NA	NA	NA	NA	NA	NA	0.429833	0.0457834	NA	NA	NA	NA	NA	NA	NA	NA	NA	NA	NA	NA	NA	NA	NA	NA	NA	NA	NA	NA	NA	NA	NA	NA	NA	NA	NA	NA	NA	NA	NA	NA	NA	NA	NA
GO_LEPTIN_MEDIATED_SIGNALING_PATHWAY	NA	NA	NA	NA	NA	NA	NA	NA	NA	NA	NA	NA	NA	NA	NA	NA	NA	NA	NA	NA	NA	NA	NA	NA	0.0179369	NA	NA	NA	NA	NA	NA	NA	NA	NA	NA	NA	NA	NA	NA	NA	NA	NA	NA	NA	NA	NA	NA	NA	NA
GO_LEUKOCYTE_AGGREGATION	NA	NA	NA	NA	NA	NA	NA	NA	NA	NA	NA	NA	NA	NA	NA	NA	NA	NA	NA	NA	NA	NA	NA	NA	NA	NA	NA	NA	NA	NA	NA	NA	NA	NA	NA	NA	NA	NA	NA	NA	NA	NA	NA	NA	0.153755	0.0145352	NA	0.00112031	NA
GO_LEUKOCYTE_APOPTOTIC_PROCESS	NA	NA	NA	NA	NA	NA	NA	NA	NA	NA	NA	NA	NA	NA	NA	NA	NA	NA	NA	NA	NA	NA	NA	NA	NA	NA	NA	NA	NA	NA	NA	NA	NA	NA	NA	NA	NA	NA	NA	NA	NA	NA	NA	NA	NA	NA	NA	NA	0.00137262
GO_LEUKOCYTE_CELL_CELL_ADHESION	NA	NA	NA	NA	NA	NA	NA	NA	NA	NA	NA	NA	NA	NA	NA	NA	NA	NA	NA	NA	NA	NA	NA	NA	NA	NA	NA	NA	NA	NA	0.801612	0.0111341	NA	0.0111341	NA	NA	NA	NA	NA	NA	NA	NA	NA	NA	NA	NA	NA	NA	NA
GO_LEUKOCYTE_HOMEOSTASIS	NA	NA	NA	NA	NA	NA	NA	NA	NA	NA	NA	NA	0.889188	0.0458443	NA	NA	NA	NA	NA	NA	NA	NA	NA	NA	NA	NA	NA	NA	NA	NA	NA	NA	NA	NA	NA	NA	NA	NA	NA	NA	NA	NA	NA	NA	NA	NA	NA	NA	0.00411107
GO_LEUKOCYTE_MEDIATED_CYTOTOXICITY	NA	NA	NA	NA	NA	NA	NA	NA	NA	NA	NA	NA	NA	NA	NA	NA	NA	NA	NA	NA	NA	NA	NA	NA	NA	NA	NA	NA	NA	NA	NA	NA	NA	NA	NA	NA	NA	NA	NA	NA	NA	NA	0.366862	0.0293732	NA	NA	NA	NA	NA
GO_LEUKOCYTE_PROLIFERATION	NA	NA	NA	NA	NA	NA	NA	NA	NA	NA	NA	NA	NA	NA	0.0383535	0.468045	NA	NA	NA	NA	NA	NA	NA	NA	NA	NA	NA	NA	NA	NA	0.711821	0.0381273	0.827102	0.0381273	NA	NA	NA	NA	NA	NA	NA	NA	NA	NA	NA	NA	NA	NA	NA
GO_LEUKOTRIENE_BIOSYNTHETIC_PROCESS	NA	NA	NA	NA	NA	NA	NA	NA	NA	NA	NA	NA	NA	NA	NA	NA	NA	NA	NA	NA	NA	NA	NA	NA	NA	NA	NA	NA	NA	NA	NA	NA	NA	NA	NA	NA	NA	NA	NA	NA	NA	NA	NA	NA	NA	NA	NA	NA	NA
GO_LEUKOTRIENE_METABOLIC_PROCESS	NA	NA	NA	NA	NA	NA	NA	NA	NA	NA	NA	NA	NA	NA	NA	NA	NA	NA	NA	NA	NA	NA	NA	NA	NA	NA	NA	NA	NA	NA	NA	NA	NA	NA	NA	NA	NA	NA	NA	NA	NA	NA	NA	NA	NA	NA	NA	NA	NA
GO_LEYDIG_CELL_DIFFERENTIATION	NA	NA	NA	NA	NA	NA	NA	NA	NA	NA	NA	NA	NA	NA	NA	NA	NA	NA	NA	NA	NA	NA	NA	NA	NA	NA	NA	NA	NA	NA	NA	NA	NA	NA	NA	0.00397026	NA	NA	NA	NA	NA	NA	NA	NA	NA	NA	NA	NA	NA
GO_LIGAND_ACTIVATED_TRANSCRIPTION_FACTOR_ACTIVITY	NA	NA	NA	NA	NA	NA	NA	NA	NA	NA	NA	NA	NA	NA	NA	NA	NA	NA	NA	NA	NA	NA	NA	NA	NA	NA	NA	NA	NA	NA	NA	NA	NA	NA	NA	NA	NA	NA	NA	NA	0.0457315	0.548647	0.462433	0.0184536	NA	NA	NA	NA	0.00712364
GO_LIGAND_GATED_CALCIUM_CHANNEL_ACTIVITY	NA	NA	NA	NA	NA	NA	NA	NA	NA	NA	NA	NA	0.138776	0.00752916	0.355013	0.0341813	0.335301	0.0109886	NA	NA	NA	NA	NA	NA	NA	NA	NA	0.0249727	NA	NA	NA	NA	NA	NA	NA	0.0215336	NA	NA	NA	NA	NA	NA	0.0377045	0.245383	NA	NA	NA	NA	NA
GO_LIGAND_GATED_CATION_CHANNEL_ACTIVITY	NA	NA	NA	NA	NA	NA	NA	NA	NA	NA	NA	NA	NA	NA	NA	NA	0.503463	0.0452743	NA	NA	NA	NA	NA	NA	NA	NA	NA	NA	NA	NA	NA	NA	NA	NA	NA	NA	NA	NA	NA	NA	NA	NA	NA	NA	NA	NA	NA	NA	NA
GO_LIGASE_ACTIVITY	NA	NA	NA	NA	0.591548	0.00984477	0.497382	0.0140175	NA	NA	NA	NA	NA	NA	NA	NA	NA	NA	NA	NA	NA	NA	NA	NA	NA	NA	NA	NA	NA	NA	NA	NA	NA	NA	0.000276901	0.424202	NA	NA	NA	NA	0.0140175	0.458139	0.0469053	0.532221	NA	NA	NA	NA	NA
GO_LIGASE_ACTIVITY_FORMING_CARBON_NITROGEN_BONDS	NA	NA	NA	NA	NA	0.0313801	NA	NA	NA	NA	NA	NA	NA	NA	NA	NA	NA	NA	NA	NA	NA	NA	NA	NA	NA	NA	NA	NA	NA	NA	NA	NA	NA	NA	NA	NA	NA	NA	NA	NA	NA	NA	NA	NA	NA	NA	NA	NA	NA
GO_LIGASE_ACTIVITY_FORMING_CARBON_OXYGEN_BONDS	0.0467908	0.203779	NA	NA	NA	NA	0.486179	0.000394836	NA	NA	NA	NA	NA	NA	NA	NA	0.133663	0.0370293	0.0428714	0.565009	0.020408	0.243586	NA	NA	NA	NA	NA	NA	NA	NA	NA	NA	NA	NA	NA	NA	NA	NA	0.016297	0.198662	0.0249217	0.465832	NA	NA	NA	NA	NA	NA	NA
GO_LIMBIC_SYSTEM_DEVELOPMENT	NA	NA	NA	NA	NA	NA	NA	NA	NA	NA	NA	NA	NA	NA	NA	NA	NA	NA	NA	NA	NA	NA	NA	NA	NA	NA	NA	NA	NA	NA	NA	NA	NA	NA	NA	NA	NA	NA	NA	NA	NA	NA	NA	NA	0.0407881	0.42854	NA	NA	NA
GO_LINOLEIC_ACID_METABOLIC_PROCESS	NA	NA	NA	NA	NA	NA	NA	NA	NA	NA	NA	NA	NA	NA	NA	NA	NA	NA	NA	NA	NA	NA	NA	NA	NA	NA	NA	NA	NA	NA	NA	NA	NA	NA	NA	NA	NA	NA	NA	NA	NA	NA	0.0253195	NA	NA	NA	NA	NA	NA
GO_LIPASE_ACTIVATOR_ACTIVITY	NA	NA	NA	NA	NA	NA	NA	NA	NA	NA	NA	NA	NA	NA	NA	NA	NA	NA	NA	NA	NA	NA	NA	NA	0.00216603	0.120262	NA	NA	NA	NA	NA	NA	NA	NA	NA	NA	NA	NA	NA	NA	NA	NA	NA	NA	NA	NA	NA	NA	NA
GO_LIPASE_ACTIVITY	NA	NA	NA	NA	NA	NA	NA	NA	NA	NA	NA	NA	NA	NA	NA	NA	NA	NA	NA	NA	NA	NA	NA	NA	NA	NA	NA	NA	NA	NA	NA	NA	NA	NA	NA	NA	NA	NA	NA	NA	NA	NA	0.0199883	0.412843	NA	NA	NA	NA	NA
GO_LIPASE_INHIBITOR_ACTIVITY	NA	NA	NA	NA	NA	NA	NA	NA	NA	NA	NA	NA	NA	NA	NA	NA	NA	NA	0.0452625	NA	NA	NA	NA	NA	NA	NA	NA	NA	NA	NA	NA	NA	NA	NA	NA	NA	NA	NA	NA	NA	NA	NA	NA	NA	NA	NA	NA	NA	NA
GO_LIPID_CATABOLIC_PROCESS	NA	NA	NA	NA	NA	NA	NA	NA	0.0200722	0.391272	NA	NA	NA	NA	NA	NA	NA	NA	NA	NA	NA	NA	0.0570298	0.0401004	NA	NA	NA	NA	NA	NA	NA	NA	NA	NA	NA	NA	NA	NA	NA	NA	NA	NA	NA	NA	0.021523	0.674957	NA	NA	NA
GO_LIPID_DROPLET_ORGANIZATION	NA	NA	NA	NA	NA	NA	NA	NA	NA	NA	0.25982	0.0257305	NA	NA	NA	NA	NA	NA	NA	NA	NA	NA	NA	NA	NA	NA	NA	NA	NA	NA	NA	NA	NA	NA	NA	NA	NA	NA	NA	NA	NA	NA	NA	NA	0.0404094	NA	NA	NA	NA
GO_LIPID_GLYCOSYLATION	NA	NA	NA	NA	NA	NA	NA	NA	NA	NA	NA	NA	NA	NA	NA	NA	NA	NA	NA	NA	NA	NA	NA	NA	0.0212549	NA	NA	NA	NA	NA	NA	NA	NA	NA	NA	NA	NA	NA	NA	NA	0.0140346	NA	NA	NA	NA	NA	NA	NA	NA
GO_LIPID_HOMEOSTASIS	NA	NA	NA	NA	NA	NA	NA	NA	NA	NA	NA	NA	NA	NA	NA	NA	NA	NA	NA	NA	NA	NA	NA	NA	NA	NA	NA	NA	NA	NA	NA	NA	NA	NA	NA	NA	NA	NA	NA	NA	0.0131826	0.710412	0.0132216	0.256554	NA	NA	0.771469	0.0125259	NA
GO_LIPID_IMPORT_INTO_CELL	NA	NA	NA	NA	0.0173331	NA	NA	NA	NA	NA	0.0148796	NA	NA	NA	NA	NA	NA	NA	NA	NA	NA	NA	NA	NA	NA	NA	NA	NA	NA	NA	NA	NA	NA	NA	NA	NA	NA	NA	NA	NA	NA	NA	NA	NA	NA	NA	0.0335765	NA	NA
GO_LIPID_LOCALIZATION	NA	NA	NA	NA	NA	NA	NA	NA	NA	NA	0.00129727	0.984109	NA	NA	NA	NA	NA	NA	NA	NA	NA	NA	NA	NA	NA	NA	NA	NA	0.929546	0.0261621	NA	NA	NA	NA	NA	NA	NA	0.048705	NA	NA	NA	NA	0.0162002	0.103696	0.0374822	0.842165	0.0200266	0.35487	NA
GO_LIPID_MODIFICATION	NA	NA	NA	NA	NA	NA	0.271903	0.00327738	0.0234153	0.209835	NA	NA	0.0091354	0.133491	NA	NA	NA	NA	0.00598745	0.18	0.190372	0.0104762	NA	NA	NA	NA	0.375231	0.00438341	0.00496698	0.735171	NA	NA	NA	NA	2.08789e-05	0.423514	0.91998	0.00346511	NA	NA	0.0587665	0.000928781	NA	NA	NA	NA	NA	NA	NA
GO_LIPID_OXIDATION	NA	NA	NA	NA	NA	NA	NA	NA	NA	NA	NA	NA	0.022303	0.251168	NA	NA	0.0954633	0.0150588	NA	NA	NA	NA	NA	NA	NA	NA	NA	NA	NA	NA	NA	NA	NA	NA	0.000134062	0.623854	NA	NA	NA	NA	NA	NA	NA	NA	NA	NA	NA	NA	NA
GO_LIPID_PHOSPHATASE_ACTIVITY	NA	NA	NA	NA	NA	NA	NA	NA	NA	NA	NA	NA	NA	NA	NA	NA	NA	NA	0.0282936	NA	NA	NA	NA	NA	NA	NA	NA	NA	NA	NA	NA	NA	NA	NA	NA	NA	NA	NA	NA	NA	NA	NA	NA	NA	NA	NA	NA	NA	NA
GO_LIPID_PHOSPHORYLATION	NA	NA	NA	NA	NA	NA	NA	NA	NA	NA	0.0457542	NA	NA	NA	0.00709892	NA	NA	NA	NA	NA	NA	NA	NA	NA	NA	NA	NA	NA	NA	NA	NA	NA	NA	NA	NA	NA	NA	NA	NA	NA	NA	NA	NA	NA	NA	NA	0.0350383	NA	NA
GO_LIPID_STORAGE	NA	NA	NA	NA	NA	NA	0.142043	0.0361974	NA	NA	NA	NA	NA	NA	NA	NA	NA	NA	NA	NA	NA	NA	0.0269466	0.448106	NA	NA	NA	NA	NA	NA	NA	NA	NA	NA	NA	NA	NA	NA	NA	NA	0.0361974	0.710642	NA	NA	NA	NA	NA	NA	NA
GO_LIPID_TRANSFER_ACTIVITY	NA	NA	NA	NA	NA	NA	0.14643	0.0265414	NA	NA	NA	NA	NA	NA	NA	NA	NA	NA	NA	NA	NA	NA	NA	NA	NA	NA	NA	NA	0.497809	0.00753403	NA	NA	NA	NA	NA	NA	NA	NA	NA	NA	NA	NA	NA	NA	NA	NA	NA	NA	NA
GO_LIPID_TRANSLOCATION	NA	NA	NA	NA	NA	NA	NA	NA	NA	NA	NA	NA	0.0302939	0.523448	NA	NA	NA	NA	NA	NA	NA	NA	0.0540126	0.0461526	NA	NA	NA	NA	NA	NA	NA	NA	NA	NA	NA	NA	NA	0.00897719	NA	NA	NA	NA	NA	NA	NA	NA	0.00844857	0.513925	NA
GO_LIPID_TRANSPORTER_ACTIVITY	NA	NA	NA	NA	NA	NA	NA	NA	NA	NA	0.000741049	NA	NA	NA	NA	NA	NA	NA	NA	NA	NA	NA	NA	NA	NA	NA	NA	NA	0.643241	0.00942409	NA	NA	0.153732	0.0455328	0.0469759	NA	NA	NA	NA	NA	NA	NA	NA	NA	0.0218021	NA	0.0279835	0.607407	NA
GO_LIPOPOLYSACCHARIDE_MEDIATED_SIGNALING_PATHWAY	NA	NA	NA	NA	NA	NA	NA	NA	NA	NA	NA	NA	NA	NA	NA	NA	NA	NA	NA	NA	NA	NA	NA	NA	NA	NA	NA	NA	NA	NA	NA	NA	NA	NA	NA	NA	NA	NA	NA	NA	NA	NA	NA	NA	NA	NA	NA	NA	NA
GO_LIPOPROTEIN_BIOSYNTHETIC_PROCESS	NA	NA	0.351577	0.0356697	NA	NA	0.469643	0.00079196	NA	NA	NA	NA	NA	NA	NA	NA	0.0186002	0.527724	NA	NA	NA	NA	NA	NA	0.0113971	NA	NA	NA	NA	NA	0.0280423	0.075035	NA	NA	NA	NA	NA	NA	NA	NA	NA	NA	NA	NA	NA	NA	0.0266838	0.0625889	NA
GO_LIPOPROTEIN_LOCALIZATION	NA	NA	NA	NA	NA	NA	NA	NA	NA	NA	NA	NA	NA	NA	NA	NA	NA	NA	NA	NA	NA	NA	NA	NA	NA	NA	NA	NA	NA	NA	NA	NA	NA	NA	NA	NA	NA	NA	NA	NA	NA	NA	NA	NA	NA	NA	NA	NA	NA
GO_LIPOPROTEIN_METABOLIC_PROCESS	NA	NA	NA	NA	NA	NA	0.370444	0.00491026	NA	NA	NA	NA	NA	NA	NA	NA	NA	NA	NA	NA	NA	NA	NA	NA	0.0153139	NA	NA	NA	NA	NA	NA	NA	NA	NA	NA	NA	NA	NA	NA	NA	NA	NA	NA	NA	NA	NA	0.00870337	0.150738	0.0193212
GO_LIPOPROTEIN_PARTICLE_RECEPTOR_ACTIVITY	NA	NA	NA	NA	NA	NA	NA	NA	NA	NA	NA	NA	NA	NA	NA	NA	0.0251264	NA	NA	NA	NA	NA	NA	NA	NA	NA	NA	NA	NA	NA	NA	NA	NA	NA	NA	NA	NA	NA	NA	NA	NA	NA	NA	NA	NA	NA	NA	NA	NA
GO_LIPOSACCHARIDE_METABOLIC_PROCESS	NA	NA	NA	NA	NA	NA	0.535666	0.0284446	0.00366752	0.807583	NA	NA	NA	NA	NA	NA	0.00177212	0.595342	NA	NA	NA	NA	NA	NA	0.00133352	NA	0.0386758	0.283171	NA	NA	0.00985194	0.0998764	NA	NA	NA	NA	0.0194503	0.0809427	NA	NA	NA	NA	0.379575	0.0320311	NA	NA	0.0422229	0.0894446	NA
GO_LIPOXYGENASE_PATHWAY	NA	NA	NA	NA	NA	NA	NA	NA	NA	NA	NA	NA	NA	NA	NA	NA	NA	NA	NA	NA	NA	NA	NA	NA	NA	NA	NA	NA	NA	NA	NA	NA	NA	NA	NA	NA	NA	NA	NA	NA	NA	NA	NA	NA	NA	NA	NA	0.0240501	NA
GO_LIVER_MORPHOGENESIS	NA	NA	NA	NA	NA	NA	NA	NA	NA	NA	NA	NA	NA	NA	NA	NA	NA	NA	NA	NA	NA	NA	NA	NA	NA	NA	NA	NA	NA	NA	NA	NA	NA	NA	NA	NA	NA	NA	NA	NA	0.0444282	NA	NA	NA	NA	NA	NA	NA	NA
GO_LIVER_REGENERATION	0.0297235	NA	NA	NA	NA	NA	NA	NA	0.0187935	0.377583	NA	NA	NA	NA	NA	NA	NA	NA	NA	NA	NA	NA	0.00207769	0.209053	NA	NA	0.30813	0.0367341	NA	NA	NA	NA	NA	NA	0.0412176	0.2452	NA	NA	NA	NA	NA	NA	NA	NA	NA	NA	NA	NA	NA
GO_LOCALIZATION_WITHIN_MEMBRANE	NA	NA	NA	NA	NA	NA	NA	NA	0.247633	0.0142452	NA	NA	NA	NA	0.0796449	0.0238307	NA	NA	NA	NA	NA	NA	NA	NA	NA	NA	NA	NA	NA	NA	NA	NA	NA	NA	NA	NA	0.00203957	0.22114	NA	NA	0.0169685	0.43392	NA	NA	NA	NA	NA	NA	NA
GO_LOCOMOTOR_RHYTHM	NA	NA	NA	NA	NA	0.00116661	NA	NA	NA	NA	NA	NA	NA	NA	NA	NA	NA	NA	NA	0.00305357	NA	NA	NA	NA	NA	NA	NA	NA	NA	NA	NA	NA	NA	NA	NA	NA	NA	NA	NA	NA	NA	NA	NA	NA	NA	NA	NA	NA	NA
GO_LOCOMOTORY_BEHAVIOR	NA	NA	NA	NA	NA	NA	NA	NA	NA	NA	NA	NA	NA	NA	NA	NA	NA	NA	0.325729	0.0188925	NA	NA	NA	NA	NA	NA	NA	NA	NA	NA	NA	NA	NA	NA	NA	NA	NA	NA	NA	NA	NA	NA	NA	NA	NA	NA	NA	NA	NA
GO_LONG_CHAIN_FATTY_ACID_METABOLIC_PROCESS	0.246864	0.0249083	NA	NA	NA	NA	NA	NA	NA	NA	NA	NA	NA	NA	NA	NA	NA	NA	NA	NA	NA	NA	NA	NA	NA	NA	NA	NA	NA	NA	NA	NA	NA	NA	NA	NA	NA	NA	NA	NA	NA	NA	0.0455445	0.706659	NA	NA	NA	NA	NA
GO_LONG_CHAIN_FATTY_ACID_TRANSPORT	NA	NA	NA	NA	NA	NA	NA	NA	NA	NA	NA	NA	0.0407962	0.327849	NA	NA	0.692613	0.0459734	NA	NA	NA	NA	NA	NA	NA	NA	NA	NA	NA	NA	NA	NA	NA	NA	0.0402408	0.48317	NA	NA	NA	NA	NA	NA	NA	NA	NA	NA	NA	NA	NA
GO_LONG_CHAIN_FATTY_ACID_TRANSPORTER_ACTIVITY	NA	NA	NA	NA	NA	NA	NA	NA	NA	NA	NA	NA	0.35214	0.0283615	NA	NA	0.234313	0.0366047	NA	0.0448285	NA	NA	NA	NA	NA	NA	NA	NA	NA	NA	NA	NA	NA	NA	NA	NA	NA	NA	NA	NA	NA	NA	NA	NA	NA	NA	NA	NA	NA
GO_LONG_TERM_SYNAPTIC_DEPRESSION	NA	NA	NA	NA	NA	NA	NA	NA	NA	NA	NA	NA	NA	NA	NA	NA	NA	NA	NA	NA	NA	NA	NA	NA	NA	NA	NA	NA	NA	NA	NA	NA	NA	NA	NA	NA	NA	NA	NA	NA	NA	NA	NA	NA	NA	0.00802265	NA	NA	NA
GO_LONG_TERM_SYNAPTIC_POTENTIATION	NA	NA	0.669765	0.0244322	NA	NA	NA	NA	NA	NA	NA	NA	NA	NA	NA	NA	NA	NA	NA	NA	NA	NA	NA	NA	NA	NA	NA	NA	NA	NA	NA	NA	NA	NA	NA	NA	NA	NA	NA	NA	NA	NA	NA	NA	NA	NA	NA	NA	NA
GO_LOW_DENSITY_LIPOPROTEIN_PARTICLE	NA	NA	NA	NA	NA	NA	NA	NA	NA	NA	NA	NA	NA	NA	NA	NA	NA	0.0220042	NA	NA	NA	NA	NA	NA	NA	NA	NA	NA	NA	NA	NA	NA	NA	NA	NA	NA	NA	NA	NA	NA	NA	NA	NA	NA	NA	NA	NA	NA	NA
GO_LOW_DENSITY_LIPOPROTEIN_PARTICLE_BINDING	NA	NA	NA	NA	NA	NA	NA	NA	NA	NA	NA	NA	NA	NA	NA	NA	0.0281881	NA	NA	NA	NA	NA	NA	NA	NA	NA	NA	NA	NA	NA	NA	NA	NA	NA	NA	NA	NA	NA	NA	NA	NA	NA	NA	NA	NA	NA	NA	NA	NA
GO_LOW_DENSITY_LIPOPROTEIN_PARTICLE_CLEARANCE	NA	NA	NA	NA	NA	NA	NA	NA	NA	NA	NA	NA	NA	NA	NA	NA	0.483166	0.0393637	NA	NA	NA	NA	NA	NA	NA	NA	NA	NA	NA	NA	NA	NA	NA	NA	NA	NA	NA	NA	NA	NA	NA	NA	NA	NA	NA	NA	NA	NA	NA
GO_LOW_DENSITY_LIPOPROTEIN_PARTICLE_RECEPTOR_BINDING	NA	NA	NA	NA	NA	NA	0.0443347	NA	NA	NA	NA	NA	NA	NA	NA	NA	NA	NA	NA	NA	NA	NA	NA	NA	NA	NA	NA	NA	NA	NA	NA	NA	NA	NA	NA	NA	NA	NA	NA	NA	0.0407945	NA	NA	NA	NA	NA	NA	NA	NA
GO_LOW_DENSITY_LIPOPROTEIN_PARTICLE_RECEPTOR_CATABOLIC_PROCESS	NA	NA	NA	0.0130729	NA	NA	NA	NA	NA	NA	NA	NA	0.0472148	NA	NA	NA	NA	0.025371	NA	NA	NA	NA	NA	NA	NA	NA	NA	NA	NA	NA	NA	NA	NA	NA	NA	NA	NA	NA	NA	NA	0.018964	0.192621	NA	NA	NA	NA	NA	NA	NA
GO_LOW_DENSITY_LIPOPROTEIN_RECEPTOR_PARTICLE_METABOLIC_PROCESS	NA	NA	NA	0.0337459	NA	NA	NA	NA	NA	NA	NA	NA	NA	NA	NA	NA	NA	NA	NA	NA	NA	NA	NA	NA	NA	NA	NA	NA	NA	NA	NA	NA	NA	NA	NA	NA	NA	NA	NA	NA	0.0481768	0.296433	NA	NA	0.239921	0.0373621	0.32806	0.0473079	NA
GO_LRR_DOMAIN_BINDING	NA	NA	NA	NA	NA	NA	NA	NA	NA	NA	NA	NA	NA	NA	NA	NA	NA	NA	NA	NA	NA	NA	NA	NA	NA	NA	NA	NA	NA	NA	NA	NA	NA	NA	NA	NA	NA	NA	NA	NA	NA	NA	NA	NA	NA	NA	0.0335765	0.229507	NA
GO_LUMENAL_SIDE_OF_ENDOPLASMIC_RETICULUM_MEMBRANE	NA	NA	NA	NA	NA	NA	NA	NA	NA	NA	NA	NA	NA	NA	NA	NA	NA	NA	NA	NA	NA	NA	NA	NA	0.0175985	NA	NA	NA	NA	NA	NA	NA	NA	NA	NA	NA	NA	NA	NA	NA	NA	NA	NA	NA	0.04603	NA	NA	NA	NA
GO_LUMENAL_SIDE_OF_MEMBRANE	NA	NA	NA	NA	NA	NA	NA	NA	NA	NA	NA	NA	NA	NA	NA	NA	0.432011	0.0264692	NA	NA	NA	NA	NA	NA	0.0311904	NA	NA	NA	NA	NA	NA	NA	NA	NA	NA	NA	NA	NA	NA	NA	NA	NA	NA	NA	NA	NA	NA	NA	NA
GO_LUNG_ALVEOLUS_DEVELOPMENT	NA	NA	NA	NA	NA	NA	NA	NA	NA	NA	NA	NA	NA	NA	0.0308983	0.370906	NA	NA	NA	NA	NA	NA	NA	NA	NA	NA	NA	NA	NA	NA	NA	NA	NA	NA	NA	NA	NA	NA	NA	NA	NA	NA	NA	NA	NA	NA	NA	NA	NA
GO_LUNG_CELL_DIFFERENTIATION	NA	NA	NA	NA	NA	NA	NA	NA	NA	NA	NA	NA	NA	NA	NA	NA	NA	NA	NA	NA	0.0419459	NA	NA	NA	NA	NA	NA	NA	NA	NA	NA	NA	NA	NA	NA	NA	NA	NA	NA	NA	NA	NA	NA	NA	NA	NA	NA	0.0473079	NA
GO_LUNG_EPITHELIUM_DEVELOPMENT	NA	NA	NA	NA	NA	NA	NA	NA	NA	NA	NA	NA	NA	NA	NA	NA	NA	NA	NA	NA	NA	NA	NA	NA	NA	NA	NA	NA	NA	NA	NA	NA	NA	NA	NA	NA	NA	NA	NA	NA	NA	NA	NA	NA	NA	NA	NA	0.0184951	NA
GO_LUNG_MORPHOGENESIS	NA	NA	NA	NA	NA	NA	NA	NA	NA	NA	NA	NA	NA	NA	NA	NA	NA	NA	NA	NA	NA	0.0485222	NA	NA	NA	NA	NA	NA	NA	NA	NA	NA	NA	NA	NA	NA	NA	NA	NA	NA	NA	NA	NA	NA	NA	NA	NA	NA	NA
GO_LUTEINIZATION	NA	NA	NA	NA	NA	NA	NA	NA	NA	NA	NA	NA	NA	NA	NA	NA	NA	NA	NA	NA	NA	NA	NA	NA	NA	NA	NA	NA	NA	NA	NA	NA	NA	NA	NA	NA	NA	NA	0.0466103	NA	NA	NA	NA	NA	NA	NA	NA	NA	NA
GO_LYASE_ACTIVITY	NA	NA	0.0331255	0.216962	NA	NA	NA	NA	0.00208278	0.302436	NA	NA	0.0086263	0.797644	0.00462611	0.0623529	NA	NA	NA	NA	NA	NA	NA	NA	NA	NA	NA	NA	0.0123223	0.108326	NA	NA	0.297931	0.0119232	NA	NA	NA	NA	NA	NA	NA	NA	NA	NA	NA	NA	NA	NA	NA
GO_LYMPH_NODE_DEVELOPMENT	NA	NA	NA	NA	NA	NA	NA	NA	NA	NA	NA	NA	NA	NA	NA	NA	NA	NA	NA	NA	NA	NA	NA	NA	NA	NA	NA	NA	NA	NA	NA	NA	NA	NA	NA	NA	NA	NA	NA	NA	NA	NA	NA	NA	NA	NA	NA	NA	NA
GO_LYMPH_VESSEL_DEVELOPMENT	NA	NA	NA	NA	NA	NA	NA	NA	NA	NA	NA	NA	NA	NA	NA	NA	NA	NA	NA	NA	NA	NA	NA	NA	NA	NA	0.0353405	NA	NA	NA	NA	NA	NA	NA	NA	NA	NA	NA	NA	NA	NA	NA	NA	NA	NA	NA	NA	NA	NA
GO_LYMPH_VESSEL_MORPHOGENESIS	NA	NA	NA	NA	NA	NA	NA	NA	NA	NA	NA	NA	NA	NA	NA	NA	NA	NA	NA	NA	NA	NA	NA	NA	NA	NA	NA	NA	NA	NA	NA	NA	NA	NA	NA	NA	NA	NA	NA	NA	NA	NA	NA	NA	NA	NA	NA	NA	NA
GO_LYMPHOCYTE_ACTIVATION_INVOLVED_IN_IMMUNE_RESPONSE	NA	NA	NA	NA	NA	NA	0.0320337	0.161716	NA	NA	NA	NA	NA	NA	NA	NA	NA	NA	NA	NA	NA	NA	NA	NA	NA	NA	NA	NA	NA	NA	NA	NA	0.565038	0.0398542	NA	NA	NA	NA	NA	NA	NA	NA	NA	NA	NA	NA	NA	NA	NA
GO_LYMPHOCYTE_APOPTOTIC_PROCESS	NA	NA	NA	NA	NA	NA	NA	NA	NA	NA	NA	NA	NA	NA	NA	NA	NA	NA	NA	NA	NA	NA	NA	NA	NA	NA	NA	NA	NA	NA	NA	NA	NA	NA	NA	NA	NA	NA	NA	NA	NA	NA	NA	NA	NA	NA	NA	NA	0.0178792
GO_LYMPHOCYTE_COSTIMULATION	NA	NA	NA	NA	NA	NA	NA	NA	NA	NA	NA	NA	NA	NA	NA	NA	NA	NA	NA	NA	NA	NA	NA	NA	NA	NA	NA	NA	NA	NA	NA	NA	NA	NA	NA	NA	NA	NA	NA	NA	NA	NA	NA	NA	NA	NA	NA	NA	NA
GO_LYMPHOCYTE_DIFFERENTIATION	NA	NA	NA	NA	NA	NA	0.242749	0.011902	NA	NA	NA	NA	NA	NA	NA	NA	NA	NA	NA	NA	NA	NA	NA	NA	NA	NA	NA	NA	NA	NA	0.627124	0.0319141	NA	NA	0.976908	0.0433475	NA	NA	NA	NA	NA	NA	NA	NA	NA	NA	NA	NA	NA
GO_LYMPHOCYTE_HOMEOSTASIS	NA	NA	NA	NA	NA	NA	NA	NA	NA	NA	NA	NA	NA	NA	NA	NA	NA	NA	NA	NA	NA	NA	NA	NA	NA	NA	NA	NA	NA	NA	NA	NA	NA	NA	NA	NA	NA	NA	0.0352468	NA	NA	NA	NA	NA	NA	NA	NA	NA	0.0115426
GO_LYMPHOCYTE_MEDIATED_IMMUNITY	NA	NA	NA	NA	NA	NA	NA	NA	NA	NA	NA	NA	NA	NA	NA	NA	NA	NA	NA	NA	NA	NA	NA	NA	NA	NA	NA	NA	NA	NA	NA	NA	0.491447	0.0281428	NA	NA	NA	NA	NA	NA	NA	NA	0.928342	0.0409875	NA	NA	NA	NA	NA
GO_LYS48_SPECIFIC_DEUBIQUITINASE_ACTIVITY	NA	0.00391236	NA	NA	NA	NA	NA	NA	NA	0.0253089	NA	NA	NA	NA	NA	NA	NA	NA	NA	NA	NA	NA	NA	NA	NA	NA	NA	NA	NA	NA	NA	NA	NA	NA	NA	NA	NA	NA	NA	NA	NA	NA	NA	NA	0.0169128	NA	0.0335765	NA	NA
GO_LYSINE_ACETYLATED_HISTONE_BINDING	NA	NA	NA	NA	NA	NA	NA	NA	NA	NA	NA	NA	NA	NA	NA	NA	NA	NA	NA	NA	NA	NA	0.000683808	0.148873	0.346579	0.0169046	NA	NA	NA	0.00116252	NA	NA	NA	NA	NA	NA	NA	NA	NA	NA	0.0444282	NA	NA	NA	NA	NA	NA	NA	NA
GO_LYSINE_METABOLIC_PROCESS	NA	NA	NA	NA	NA	NA	NA	NA	0.0215316	NA	NA	NA	NA	NA	NA	NA	NA	NA	NA	NA	NA	NA	NA	NA	NA	NA	NA	NA	NA	NA	NA	NA	NA	NA	NA	NA	NA	NA	NA	NA	NA	NA	NA	NA	NA	NA	NA	NA	NA
GO_LYSINE_N_METHYLTRANSFERASE_ACTIVITY	NA	NA	NA	NA	NA	NA	0.0780923	0.0151811	NA	NA	0.499176	0.0198261	NA	NA	NA	NA	NA	NA	NA	NA	NA	NA	0.0133184	0.365391	NA	NA	0.0340749	0.446144	NA	NA	NA	NA	NA	NA	NA	NA	NA	NA	NA	NA	NA	NA	NA	NA	0.0372585	0.565968	NA	NA	NA
GO_LYSOPHOSPHOLIPASE_ACTIVITY	NA	NA	NA	NA	NA	0.049466	NA	NA	NA	NA	NA	NA	NA	NA	NA	NA	NA	NA	NA	NA	NA	NA	NA	NA	NA	NA	NA	NA	NA	NA	NA	NA	NA	NA	NA	NA	NA	NA	NA	NA	NA	NA	0.0031156	NA	NA	NA	NA	NA	NA
GO_LYSOPHOSPHOLIPID_ACYLTRANSFERASE_ACTIVITY	NA	NA	NA	NA	NA	NA	NA	NA	NA	NA	NA	NA	NA	NA	NA	NA	0.00301303	NA	0.049965	0.319915	NA	NA	NA	NA	NA	NA	0.196387	0.0137193	NA	NA	NA	NA	NA	NA	NA	NA	NA	NA	NA	NA	NA	NA	NA	NA	NA	NA	NA	NA	NA
GO_LYSOSOMAL_LUMEN	0.194235	0.00199664	NA	NA	0.00105828	0.159274	0.0194701	0.183644	NA	NA	NA	NA	NA	NA	0.00548181	0.0936965	NA	NA	NA	NA	0.0482683	NA	NA	NA	NA	NA	NA	NA	NA	NA	0.309632	0.0157095	0.623195	0.0157095	NA	NA	NA	NA	NA	NA	NA	NA	NA	NA	NA	0.00181806	NA	NA	0.00606964
GO_LYSOSOMAL_PROTEIN_CATABOLIC_PROCESS	NA	NA	NA	NA	NA	0.0190072	NA	NA	0.0283183	NA	NA	NA	NA	NA	NA	NA	NA	NA	NA	NA	NA	NA	NA	NA	0.0325649	NA	NA	NA	NA	NA	NA	NA	NA	NA	NA	NA	NA	NA	NA	NA	NA	NA	NA	NA	NA	0.0166251	NA	NA	NA
GO_LYSOSOMAL_TRANSPORT	NA	NA	NA	NA	NA	NA	NA	NA	NA	NA	0.123005	0.00360545	NA	NA	NA	NA	NA	NA	NA	NA	NA	NA	NA	NA	0.00525881	0.264899	NA	NA	NA	0.0214095	NA	NA	NA	NA	NA	NA	NA	NA	NA	NA	NA	NA	0.0100152	0.332106	NA	NA	NA	NA	NA
GO_LYSOSOME_LOCALIZATION	NA	NA	NA	NA	0.01266	0.292056	NA	NA	NA	NA	NA	NA	NA	NA	NA	NA	NA	NA	NA	NA	NA	NA	NA	NA	NA	NA	NA	NA	NA	NA	NA	NA	NA	NA	NA	NA	NA	NA	NA	NA	NA	NA	NA	NA	NA	NA	NA	NA	NA
GO_LYTIC_VACUOLE_ORGANIZATION	NA	NA	NA	NA	0.0467017	0.249516	NA	NA	NA	NA	NA	NA	0.50626	0.00395022	NA	NA	NA	NA	NA	NA	NA	NA	NA	NA	0.00176638	0.124443	0.0414265	0.47196	NA	NA	0.545937	0.0294653	NA	NA	NA	NA	NA	NA	NA	NA	NA	NA	NA	NA	NA	NA	NA	NA	NA
GO_M_BAND	NA	NA	NA	NA	NA	NA	NA	NA	NA	NA	NA	NA	0.0242428	0.057681	NA	NA	NA	NA	NA	NA	NA	NA	NA	NA	NA	NA	NA	NA	NA	NA	NA	NA	NA	NA	NA	NA	0.0220268	NA	NA	NA	NA	NA	NA	NA	NA	NA	NA	NA	NA
GO_MACROAUTOPHAGY	NA	NA	0.552194	0.0173431	0.316164	0.0353152	0.382025	0.00319644	NA	NA	NA	NA	0.00559342	0.716848	NA	NA	0.00963667	0.0541345	NA	NA	NA	NA	NA	NA	0.00274009	0.153602	0.145676	0.00956876	NA	NA	NA	NA	NA	NA	NA	NA	0.546181	0.0237159	0.0162837	0.814809	NA	NA	0.0319233	0.118801	NA	NA	0.0183804	0.333561	0.0305287
GO_MACROMOLECULE_DEACYLATION	0.61051	0.00337925	NA	NA	5.83802e-05	0.0756324	NA	NA	NA	NA	NA	NA	NA	NA	0.556203	0.00159157	NA	NA	0.0195203	0.656182	0.00512543	0.531009	NA	NA	NA	NA	0.0386758	0.0885339	0.107134	0.00430959	NA	NA	NA	NA	0.308642	0.0164016	0.0194503	0.638851	NA	NA	NA	NA	NA	NA	0.0431292	0.185366	0.0121769	0.0894446	0.0100358
GO_MACROMOLECULE_DEPALMITOYLATION	NA	NA	NA	NA	NA	NA	NA	NA	NA	NA	NA	NA	NA	NA	NA	NA	NA	NA	NA	NA	NA	NA	NA	NA	NA	NA	NA	NA	NA	NA	NA	NA	NA	NA	NA	NA	NA	NA	NA	NA	NA	NA	NA	NA	NA	NA	0.0201405	NA	NA
GO_MACROMOLECULE_TRANSMEMBRANE_TRANSPORTER_ACTIVITY	NA	NA	NA	NA	NA	NA	NA	NA	NA	NA	NA	NA	NA	NA	NA	NA	NA	NA	NA	NA	NA	NA	NA	NA	NA	NA	NA	NA	NA	NA	NA	NA	NA	NA	NA	NA	NA	NA	NA	NA	NA	NA	NA	NA	NA	NA	NA	NA	NA
GO_MACROPHAGE_ACTIVATION	NA	NA	NA	NA	NA	NA	NA	NA	NA	NA	NA	NA	NA	NA	NA	NA	0.0209029	0.543988	NA	NA	NA	NA	NA	NA	NA	NA	NA	NA	NA	NA	NA	NA	NA	NA	NA	NA	NA	NA	NA	NA	NA	NA	NA	NA	NA	NA	NA	NA	NA
GO_MACROPHAGE_ACTIVATION_INVOLVED_IN_IMMUNE_RESPONSE	NA	NA	NA	NA	NA	NA	NA	NA	NA	NA	NA	NA	NA	NA	NA	NA	NA	NA	NA	NA	NA	NA	NA	NA	NA	NA	NA	NA	NA	0.00881793	NA	NA	NA	NA	NA	NA	NA	NA	NA	NA	NA	NA	NA	NA	NA	NA	NA	NA	NA
GO_MACROPHAGE_APOPTOTIC_PROCESS	NA	NA	NA	NA	NA	NA	NA	NA	NA	NA	NA	NA	0.263886	0.0144869	NA	NA	NA	NA	NA	NA	NA	NA	NA	NA	NA	NA	NA	NA	NA	NA	NA	NA	NA	NA	NA	NA	NA	NA	NA	NA	NA	NA	NA	NA	NA	NA	NA	NA	NA
GO_MACROPHAGE_PROLIFERATION	NA	NA	NA	NA	NA	NA	NA	NA	NA	NA	NA	NA	NA	NA	NA	NA	NA	NA	NA	NA	NA	NA	NA	NA	NA	NA	NA	NA	NA	NA	NA	NA	NA	NA	NA	NA	NA	NA	NA	NA	0.0140346	NA	NA	NA	NA	NA	NA	NA	NA
GO_MAGNESIUM_DEPENDENT_PROTEIN_SERINE_THREONINE_PHOSPHATASE_ACTIVITY	NA	NA	NA	NA	NA	NA	NA	NA	NA	NA	NA	NA	NA	NA	NA	NA	NA	NA	NA	NA	NA	NA	NA	NA	NA	NA	NA	NA	NA	NA	NA	NA	0.00625538	NA	NA	NA	NA	NA	NA	NA	NA	NA	NA	NA	NA	NA	NA	NA	NA
GO_MAGNESIUM_ION_BINDING	NA	NA	NA	NA	0.0473575	0.0928214	NA	NA	NA	NA	NA	NA	NA	NA	NA	NA	NA	NA	NA	NA	0.0361114	0.773349	0.00794681	0.471409	0.124224	0.0487239	NA	NA	NA	NA	NA	NA	NA	NA	NA	NA	NA	NA	NA	NA	NA	NA	NA	NA	NA	NA	NA	NA	NA
GO_MAGNESIUM_ION_HOMEOSTASIS	NA	NA	NA	NA	NA	NA	NA	NA	NA	NA	NA	NA	NA	NA	NA	NA	NA	NA	NA	0.0232318	NA	NA	NA	NA	NA	NA	NA	NA	NA	NA	NA	NA	0.00625538	0.113507	NA	NA	NA	NA	NA	NA	NA	NA	NA	NA	NA	NA	0.0172348	NA	NA
GO_MAGNESIUM_ION_TRANSMEMBRANE_TRANSPORTER_ACTIVITY	NA	NA	NA	NA	NA	NA	NA	NA	NA	NA	NA	NA	NA	NA	NA	NA	NA	NA	NA	NA	NA	NA	NA	NA	NA	NA	NA	NA	0.0271775	NA	NA	NA	NA	NA	NA	NA	NA	NA	NA	NA	NA	NA	NA	NA	NA	NA	0.0299597	NA	NA
GO_MAGNESIUM_ION_TRANSPORT	NA	NA	NA	NA	NA	NA	NA	NA	NA	NA	NA	NA	NA	NA	NA	NA	NA	NA	NA	NA	NA	NA	NA	NA	NA	NA	NA	NA	0.0304758	NA	NA	NA	NA	NA	NA	NA	NA	NA	NA	NA	NA	NA	NA	NA	NA	NA	0.0335765	NA	NA
GO_MAIN_AXON	NA	NA	NA	NA	NA	NA	NA	NA	NA	NA	NA	0.000419271	NA	NA	0.0270449	0.177539	0.28618	0.00750526	NA	NA	NA	NA	NA	NA	NA	NA	NA	NA	NA	NA	0.0454237	0.495267	0.150254	0.030605	0.0314165	0.45027	NA	NA	NA	NA	NA	NA	NA	NA	NA	NA	0.325188	0.00375802	NA
GO_MAINTENANCE_OF_BLOOD_BRAIN_BARRIER	NA	NA	NA	NA	NA	NA	NA	NA	NA	NA	NA	NA	NA	NA	NA	NA	NA	NA	NA	NA	0.0123177	NA	0.00247765	NA	NA	NA	NA	NA	NA	NA	0.0598154	0.00467335	NA	NA	0.291863	0.0355227	0.270131	0.0382439	NA	NA	NA	NA	NA	NA	NA	0.010372	NA	NA	NA
GO_MAINTENANCE_OF_CELL_NUMBER	NA	NA	NA	NA	NA	NA	NA	NA	NA	NA	NA	NA	NA	NA	NA	NA	NA	NA	NA	NA	NA	NA	NA	NA	0.0387915	0.188412	NA	NA	NA	NA	NA	NA	NA	NA	NA	NA	NA	NA	NA	NA	NA	NA	NA	NA	NA	NA	NA	NA	NA
GO_MAINTENANCE_OF_GASTROINTESTINAL_EPITHELIUM	NA	NA	NA	NA	NA	NA	NA	NA	NA	NA	NA	NA	NA	NA	NA	NA	NA	NA	NA	NA	NA	NA	NA	NA	NA	NA	NA	NA	NA	NA	NA	NA	NA	NA	NA	NA	NA	NA	NA	NA	0.277775	0.039804	NA	NA	NA	NA	NA	NA	NA
GO_MAINTENANCE_OF_LOCATION	NA	NA	NA	NA	NA	NA	0.00239114	0.127824	NA	NA	NA	NA	NA	NA	NA	NA	NA	NA	NA	NA	NA	NA	NA	NA	NA	NA	0.509019	0.0122503	NA	NA	NA	NA	NA	NA	NA	NA	NA	NA	NA	NA	NA	NA	NA	NA	0.741597	0.0305084	NA	NA	NA
GO_MAINTENANCE_OF_LOCATION_IN_CELL	NA	NA	NA	NA	NA	NA	0.00849534	0.64801	NA	NA	NA	NA	NA	NA	NA	NA	0.247602	0.0164111	0.919528	0.03086	NA	NA	NA	NA	NA	NA	NA	NA	NA	NA	NA	NA	NA	NA	NA	NA	NA	NA	NA	NA	NA	NA	NA	NA	0.728279	0.0262891	NA	NA	NA
GO_MAINTENANCE_OF_ORGANELLE_LOCATION	NA	NA	NA	NA	NA	NA	NA	NA	NA	NA	NA	NA	NA	NA	NA	NA	NA	NA	NA	NA	NA	NA	NA	NA	NA	NA	NA	NA	NA	NA	NA	NA	NA	NA	NA	NA	NA	NA	NA	NA	NA	NA	NA	NA	0.00853292	NA	NA	NA	NA
GO_MAINTENANCE_OF_PROTEIN_LOCALIZATION_IN_ORGANELLE	NA	NA	0.413888	0.0158897	NA	NA	NA	NA	NA	NA	NA	NA	NA	NA	NA	NA	NA	NA	NA	NA	NA	NA	NA	NA	NA	NA	NA	NA	NA	NA	NA	NA	NA	NA	NA	NA	NA	NA	NA	NA	NA	NA	NA	NA	NA	NA	NA	NA	NA
GO_MAINTENANCE_OF_PROTEIN_LOCATION	NA	NA	NA	NA	NA	NA	NA	NA	NA	NA	NA	NA	NA	NA	0.0705772	0.0207815	NA	NA	0.833434	0.0111123	NA	NA	NA	NA	NA	NA	0.287779	0.0118181	NA	NA	NA	NA	NA	NA	NA	NA	NA	NA	NA	NA	NA	NA	NA	NA	NA	NA	NA	NA	NA
GO_MAINTENANCE_OF_PROTEIN_LOCATION_IN_CELL	NA	NA	0.193543	0.0471977	NA	NA	NA	NA	NA	NA	NA	NA	NA	NA	NA	NA	NA	NA	NA	0.00177116	NA	NA	NA	NA	NA	NA	NA	NA	NA	NA	NA	NA	NA	NA	0.0268868	0.430544	NA	0.0206231	NA	NA	NA	NA	NA	NA	NA	NA	NA	NA	NA
GO_MAINTENANCE_OF_PROTEIN_LOCATION_IN_NUCLEUS	NA	NA	NA	0.0337459	NA	NA	NA	NA	NA	NA	NA	NA	NA	NA	NA	NA	NA	NA	NA	NA	NA	NA	NA	NA	NA	NA	NA	0.0198028	NA	NA	NA	NA	NA	NA	0.0222998	0.183018	NA	NA	NA	NA	NA	NA	NA	NA	NA	NA	NA	NA	NA
GO_MAINTENANCE_OF_SISTER_CHROMATID_COHESION	NA	NA	NA	NA	NA	NA	NA	NA	NA	NA	NA	NA	0.0353922	NA	NA	NA	NA	NA	NA	NA	NA	NA	NA	NA	NA	NA	NA	NA	NA	NA	NA	NA	NA	NA	NA	NA	NA	NA	NA	NA	NA	0.0136773	NA	NA	NA	NA	NA	NA	NA
GO_MAINTENANCE_OF_SYNAPSE_STRUCTURE	NA	NA	NA	NA	NA	NA	NA	NA	NA	NA	NA	NA	NA	NA	NA	NA	0.234313	0.0366047	NA	NA	NA	NA	NA	NA	NA	NA	NA	NA	NA	NA	NA	NA	NA	NA	NA	NA	NA	NA	NA	NA	NA	NA	NA	NA	NA	NA	NA	NA	NA
GO_MALE_GERM_CELL_NUCLEUS	NA	NA	NA	NA	NA	NA	NA	NA	NA	NA	NA	NA	NA	NA	NA	NA	NA	NA	NA	NA	NA	NA	NA	NA	0.0325649	NA	NA	NA	NA	NA	NA	NA	NA	NA	NA	NA	NA	NA	NA	NA	NA	0.0211193	NA	NA	NA	NA	NA	NA	NA
GO_MALE_MEIOTIC_NUCLEAR_DIVISION	NA	NA	NA	NA	NA	NA	NA	NA	NA	NA	NA	NA	NA	NA	NA	NA	NA	NA	NA	NA	NA	NA	NA	NA	NA	NA	NA	NA	NA	NA	NA	NA	NA	NA	NA	NA	NA	NA	NA	NA	NA	0.034272	NA	NA	NA	NA	NA	NA	NA
GO_MALE_SEX_DETERMINATION	NA	NA	NA	NA	NA	NA	NA	NA	NA	NA	NA	NA	NA	NA	NA	NA	NA	NA	NA	NA	NA	NA	NA	NA	NA	NA	NA	NA	NA	NA	NA	NA	NA	NA	NA	NA	NA	NA	NA	NA	NA	NA	NA	NA	0.0132619	NA	NA	NA	NA
GO_MALE_SEX_DIFFERENTIATION	NA	NA	NA	NA	NA	NA	NA	NA	NA	NA	NA	NA	NA	NA	NA	NA	NA	NA	NA	NA	NA	NA	NA	NA	NA	NA	NA	NA	NA	NA	NA	NA	NA	NA	NA	NA	NA	NA	NA	NA	NA	NA	NA	NA	NA	NA	NA	NA	NA
GO_MAMMARY_GLAND_ALVEOLUS_DEVELOPMENT	NA	NA	0.21458	0.0235713	NA	NA	NA	NA	NA	NA	NA	NA	NA	NA	NA	NA	NA	NA	NA	NA	0.0294203	NA	NA	NA	0.307521	0.0127389	NA	NA	NA	NA	NA	NA	NA	NA	NA	NA	NA	NA	NA	NA	NA	NA	NA	NA	NA	NA	0.0412855	0.252794	NA
GO_MAMMARY_GLAND_DEVELOPMENT	NA	NA	NA	NA	NA	NA	NA	NA	NA	NA	NA	NA	NA	NA	NA	NA	NA	NA	NA	NA	NA	NA	NA	NA	NA	NA	NA	NA	NA	NA	NA	NA	NA	NA	NA	NA	NA	NA	NA	NA	NA	NA	NA	NA	NA	NA	NA	NA	NA
GO_MAMMARY_GLAND_DUCT_MORPHOGENESIS	NA	NA	NA	0.000675293	NA	NA	NA	NA	NA	NA	NA	NA	NA	NA	NA	NA	0.0883879	0.0193744	NA	NA	NA	NA	NA	NA	NA	0.0342132	NA	NA	NA	0.0374674	NA	NA	NA	NA	NA	NA	NA	NA	NA	NA	NA	NA	NA	0.0462961	NA	NA	NA	NA	NA
GO_MAMMARY_GLAND_EPITHELIAL_CELL_DIFFERENTIATION	NA	NA	NA	NA	NA	NA	NA	0.0274991	NA	NA	NA	NA	NA	NA	NA	NA	NA	NA	NA	NA	NA	NA	NA	NA	NA	NA	NA	NA	NA	NA	NA	NA	NA	NA	NA	NA	NA	NA	NA	NA	NA	NA	NA	NA	NA	NA	NA	NA	NA
GO_MAMMARY_GLAND_EPITHELIAL_CELL_PROLIFERATION	NA	NA	NA	0.0483973	NA	NA	NA	NA	NA	NA	NA	NA	NA	NA	NA	NA	NA	NA	NA	NA	NA	NA	NA	NA	NA	NA	NA	NA	NA	NA	NA	NA	NA	NA	NA	NA	NA	NA	NA	NA	NA	NA	NA	NA	NA	NA	NA	NA	NA
GO_MAMMARY_GLAND_EPITHELIUM_DEVELOPMENT	NA	NA	0.594977	0.0124513	NA	NA	NA	NA	NA	NA	NA	NA	NA	NA	NA	NA	0.30348	0.0388193	NA	NA	NA	NA	NA	NA	NA	NA	NA	NA	NA	NA	NA	NA	NA	NA	NA	NA	NA	NA	NA	NA	NA	NA	NA	0.0411937	NA	NA	NA	NA	NA
GO_MAMMARY_GLAND_MORPHOGENESIS	NA	NA	0.435858	0.00246158	NA	NA	NA	NA	NA	NA	NA	NA	NA	NA	NA	NA	0.155162	0.0468025	NA	NA	NA	NA	NA	NA	NA	NA	NA	NA	NA	NA	NA	NA	NA	NA	NA	NA	NA	NA	NA	NA	NA	NA	NA	NA	NA	NA	NA	NA	NA
GO_MANGANESE_ION_BINDING	NA	NA	NA	NA	NA	NA	NA	NA	NA	NA	NA	NA	NA	NA	NA	NA	NA	NA	NA	NA	NA	NA	NA	NA	0.0342072	0.443731	0.0369268	NA	NA	NA	0.03905	0.474518	NA	NA	NA	NA	0.1176	0.0206231	NA	NA	NA	NA	NA	NA	NA	NA	NA	NA	NA
GO_MANGANESE_ION_TRANSPORT	NA	NA	NA	NA	NA	NA	0.001627	0.207375	NA	NA	NA	NA	NA	NA	0.0253324	0.15587	NA	NA	NA	NA	NA	NA	NA	NA	NA	0.00801079	NA	NA	NA	NA	NA	NA	NA	NA	NA	NA	NA	NA	NA	NA	0.0216622	0.204871	NA	NA	NA	NA	NA	NA	NA
GO_MANNOSE_BINDING	NA	NA	NA	NA	NA	NA	NA	NA	NA	NA	NA	NA	NA	NA	NA	NA	NA	NA	NA	NA	0.0323874	NA	NA	NA	NA	NA	0.0216037	NA	NA	NA	NA	NA	NA	NA	NA	NA	NA	NA	NA	NA	NA	NA	0.0230858	0.194699	NA	0.0287993	NA	NA	NA
GO_MANNOSIDASE_ACTIVITY	NA	NA	NA	NA	NA	NA	NA	NA	NA	NA	NA	NA	NA	NA	NA	NA	NA	NA	NA	NA	NA	NA	NA	NA	NA	NA	NA	NA	NA	NA	0.161817	0.00956494	NA	NA	NA	NA	NA	NA	NA	NA	0.0216622	NA	NA	NA	NA	NA	NA	6.27632e-05	NA
GO_MANNOSYLATION	NA	NA	NA	NA	NA	NA	NA	NA	NA	NA	0.337941	0.0459831	NA	NA	NA	NA	NA	NA	NA	NA	NA	NA	NA	NA	0.00530371	0.287399	NA	NA	NA	NA	NA	NA	NA	NA	NA	NA	NA	NA	NA	NA	NA	NA	NA	NA	NA	NA	NA	NA	NA
GO_MANNOSYLTRANSFERASE_ACTIVITY	NA	NA	0.0483973	0.29955	0.0442096	0.332713	NA	NA	NA	NA	NA	NA	NA	NA	NA	NA	NA	NA	NA	NA	NA	NA	NA	NA	NA	NA	NA	NA	NA	NA	NA	NA	NA	NA	NA	NA	NA	NA	NA	NA	NA	NA	NA	NA	NA	NA	NA	NA	NA
GO_MAP_KINASE_ACTIVITY	NA	NA	NA	NA	NA	NA	NA	NA	NA	NA	NA	NA	NA	NA	NA	NA	NA	NA	NA	NA	NA	NA	NA	NA	NA	NA	NA	NA	NA	NA	NA	NA	NA	NA	NA	NA	NA	NA	NA	NA	NA	NA	NA	NA	NA	NA	0.292276	0.0365967	NA
GO_MAP_KINASE_KINASE_ACTIVITY	NA	NA	NA	NA	NA	NA	NA	NA	0.0398538	0.234027	NA	NA	NA	NA	NA	NA	NA	NA	NA	NA	0.026569	NA	NA	NA	NA	NA	NA	NA	NA	NA	NA	NA	NA	NA	NA	NA	NA	NA	NA	NA	NA	NA	NA	NA	NA	NA	0.26737	0.0300602	NA
GO_MAP_KINASE_KINASE_KINASE_ACTIVITY	NA	NA	0.036513	0.262979	NA	NA	NA	0.00572656	NA	NA	NA	NA	NA	NA	NA	NA	NA	NA	NA	NA	NA	NA	NA	NA	NA	NA	NA	NA	NA	NA	NA	NA	NA	NA	NA	NA	NA	NA	NA	NA	NA	NA	0.0325162	NA	NA	NA	NA	NA	NA
GO_MAP_KINASE_SCAFFOLD_ACTIVITY	NA	NA	NA	NA	NA	NA	NA	NA	0.015541	NA	NA	NA	NA	NA	NA	NA	NA	NA	NA	NA	NA	NA	NA	NA	NA	NA	NA	NA	NA	NA	NA	NA	NA	NA	NA	NA	NA	NA	NA	NA	NA	NA	NA	NA	NA	NA	NA	NA	NA
GO_MAST_CELL_ACTIVATION	NA	NA	NA	NA	NA	NA	NA	NA	NA	NA	NA	NA	NA	NA	NA	NA	NA	NA	NA	NA	NA	NA	NA	NA	NA	NA	NA	NA	NA	NA	NA	NA	NA	NA	NA	NA	NA	NA	0.0342138	NA	NA	NA	NA	NA	NA	NA	NA	NA	NA
GO_MAST_CELL_MEDIATED_IMMUNITY	NA	NA	NA	NA	NA	NA	NA	NA	NA	NA	NA	NA	NA	NA	NA	NA	NA	NA	NA	NA	NA	NA	NA	NA	NA	NA	NA	NA	NA	NA	NA	NA	NA	NA	NA	NA	NA	NA	NA	NA	NA	NA	NA	NA	NA	NA	NA	NA	NA
GO_MAST_CELL_MIGRATION	NA	NA	NA	NA	NA	NA	NA	NA	NA	NA	NA	NA	NA	NA	NA	NA	NA	NA	NA	NA	NA	NA	NA	NA	NA	NA	NA	NA	NA	NA	0.0097562	0.122366	NA	NA	NA	NA	NA	NA	NA	NA	NA	NA	NA	NA	NA	NA	0.0201405	NA	0.00418674
GO_MATING	NA	NA	NA	NA	NA	NA	NA	NA	NA	NA	NA	NA	NA	NA	NA	NA	NA	0.0370293	NA	NA	NA	NA	NA	NA	NA	NA	NA	NA	NA	NA	NA	NA	NA	NA	NA	NA	NA	NA	NA	NA	NA	NA	NA	NA	NA	NA	NA	NA	NA
GO_MATURATION_OF_5_8S_RRNA	NA	NA	NA	NA	NA	NA	NA	NA	NA	NA	NA	NA	NA	NA	NA	NA	NA	NA	NA	NA	NA	NA	NA	NA	NA	NA	NA	NA	NA	0.0464278	NA	NA	NA	NA	NA	NA	NA	NA	NA	NA	NA	NA	NA	NA	NA	NA	NA	NA	NA
GO_MATURATION_OF_LSU_RRNA	NA	NA	NA	NA	NA	NA	NA	NA	NA	NA	NA	NA	NA	NA	NA	NA	NA	NA	NA	NA	NA	NA	NA	NA	NA	NA	NA	NA	0.368094	0.0292706	NA	NA	NA	NA	NA	NA	NA	NA	NA	NA	NA	NA	NA	NA	NA	NA	NA	NA	NA
GO_MATURATION_OF_LSU_RRNA_FROM_TRICISTRONIC_RRNA_TRANSCRIPT_SSU_RRNA_5_8S_RRNA_LSU_RRNA	NA	NA	NA	NA	NA	NA	NA	NA	NA	NA	NA	NA	NA	NA	NA	NA	NA	NA	NA	NA	NA	NA	NA	NA	NA	NA	NA	NA	NA	NA	NA	NA	NA	NA	NA	NA	NA	NA	NA	NA	NA	NA	NA	NA	NA	NA	NA	NA	NA
GO_MATURATION_OF_SSU_RRNA	NA	NA	NA	NA	NA	NA	0.0487977	NA	NA	NA	NA	NA	NA	NA	NA	NA	NA	NA	NA	NA	NA	NA	NA	NA	NA	NA	NA	NA	NA	NA	NA	NA	NA	NA	NA	NA	NA	NA	NA	NA	0.0435718	0.180881	NA	NA	NA	NA	NA	NA	NA
GO_MATURATION_OF_SSU_RRNA_FROM_TRICISTRONIC_RRNA_TRANSCRIPT_SSU_RRNA_5_8S_RRNA_LSU_RRNA	NA	NA	NA	NA	NA	NA	NA	NA	NA	NA	NA	NA	NA	NA	NA	NA	NA	NA	0.0353576	0.176989	NA	NA	NA	NA	NA	NA	NA	NA	NA	NA	NA	NA	NA	NA	NA	NA	NA	NA	NA	NA	0.0203937	0.112907	NA	NA	NA	NA	NA	NA	NA
GO_MATURE_B_CELL_DIFFERENTIATION	NA	NA	NA	NA	NA	NA	NA	NA	NA	NA	NA	NA	NA	NA	NA	NA	NA	NA	NA	NA	NA	NA	NA	NA	NA	NA	NA	NA	NA	NA	NA	NA	NA	NA	NA	NA	NA	NA	NA	NA	NA	NA	NA	NA	NA	0.00602107	NA	NA	NA
GO_MATURE_B_CELL_DIFFERENTIATION_INVOLVED_IN_IMMUNE_RESPONSE	NA	NA	NA	NA	NA	0.0391659	0.0482615	NA	NA	NA	NA	NA	NA	NA	NA	NA	NA	NA	NA	NA	NA	NA	NA	NA	NA	NA	NA	NA	NA	NA	NA	NA	NA	NA	NA	NA	NA	NA	NA	NA	NA	NA	NA	NA	NA	0.00300201	NA	NA	NA
GO_MDA_5_SIGNALING_PATHWAY	NA	NA	NA	NA	NA	NA	NA	NA	NA	NA	NA	NA	0.225312	0.0100828	NA	NA	0.0100188	NA	NA	NA	NA	NA	NA	NA	NA	NA	NA	NA	NA	NA	NA	NA	NA	NA	NA	NA	NA	NA	NA	NA	NA	NA	NA	NA	NA	NA	NA	NA	NA
GO_MECHANORECEPTOR_DIFFERENTIATION	NA	NA	NA	NA	NA	NA	NA	NA	NA	NA	NA	NA	NA	NA	NA	NA	NA	NA	NA	NA	NA	NA	NA	NA	NA	NA	NA	NA	NA	NA	0.180494	0.0283487	NA	NA	NA	NA	NA	NA	NA	NA	NA	NA	NA	NA	0.0435741	NA	NA	NA	NA
GO_MECHANOSENSORY_BEHAVIOR	NA	NA	NA	NA	NA	NA	0.0236083	NA	NA	NA	NA	NA	NA	NA	NA	NA	NA	NA	NA	NA	NA	NA	NA	0.00521521	NA	NA	NA	NA	NA	NA	NA	NA	NA	NA	NA	NA	NA	NA	NA	NA	NA	NA	NA	NA	NA	NA	NA	NA	NA
GO_MEDIATOR_COMPLEX	NA	NA	NA	NA	NA	NA	NA	NA	NA	NA	NA	NA	NA	NA	NA	NA	NA	NA	NA	0.048843	NA	NA	NA	NA	NA	NA	NA	NA	NA	NA	NA	NA	NA	NA	NA	NA	NA	NA	NA	NA	NA	NA	NA	NA	NA	NA	NA	NA	NA
GO_MEDIUM_CHAIN_FATTY_ACID_METABOLIC_PROCESS	NA	NA	NA	NA	NA	NA	NA	NA	NA	NA	NA	NA	NA	NA	NA	NA	NA	NA	0.0282936	NA	NA	NA	NA	NA	NA	NA	NA	NA	NA	NA	0.0112952	NA	NA	NA	NA	NA	NA	NA	NA	NA	NA	NA	NA	NA	0.0115834	NA	NA	NA	NA
GO_MEGAKARYOCYTE_DEVELOPMENT	NA	NA	NA	NA	NA	NA	NA	NA	NA	0.0253089	NA	NA	NA	NA	NA	NA	NA	NA	NA	NA	NA	NA	NA	NA	NA	NA	NA	NA	NA	NA	NA	NA	NA	NA	NA	NA	NA	NA	NA	NA	NA	NA	NA	NA	NA	NA	NA	NA	NA
GO_MEGAKARYOCYTE_DIFFERENTIATION	NA	NA	0.720272	0.0379852	NA	NA	NA	NA	NA	NA	NA	NA	NA	NA	NA	NA	NA	NA	NA	NA	NA	NA	NA	NA	NA	NA	NA	NA	NA	NA	NA	NA	NA	NA	NA	NA	NA	NA	NA	NA	NA	NA	NA	NA	NA	NA	NA	NA	NA
GO_MEIOTIC_SPINDLE_ORGANIZATION	NA	NA	NA	NA	NA	NA	NA	NA	NA	NA	NA	NA	NA	NA	NA	NA	NA	NA	NA	NA	NA	NA	NA	NA	0.0248056	NA	NA	NA	NA	NA	NA	NA	NA	NA	NA	NA	NA	NA	NA	NA	NA	NA	NA	NA	NA	NA	NA	NA	NA
GO_MELANOCYTE_DIFFERENTIATION	NA	NA	NA	NA	NA	NA	NA	NA	NA	NA	NA	NA	NA	NA	NA	NA	NA	NA	NA	NA	NA	NA	NA	NA	NA	NA	NA	NA	NA	NA	NA	NA	NA	NA	NA	NA	NA	NA	NA	NA	NA	NA	NA	NA	NA	NA	NA	NA	NA
GO_MEMBRANE_BIOGENESIS	NA	NA	NA	NA	NA	NA	NA	NA	NA	NA	NA	NA	NA	NA	0.167292	0.0131869	NA	NA	NA	NA	NA	NA	NA	NA	NA	NA	NA	NA	NA	NA	NA	NA	NA	NA	NA	NA	NA	NA	NA	NA	NA	NA	NA	NA	NA	NA	NA	NA	NA
GO_MEMBRANE_COAT	0.0452547	0.407364	NA	NA	NA	NA	NA	NA	NA	NA	0.279401	0.011374	0.0315272	0.182025	NA	NA	0.431699	0.000290112	NA	NA	NA	NA	NA	NA	NA	NA	NA	NA	NA	NA	NA	NA	NA	NA	NA	NA	NA	NA	NA	0.0142492	0.0149938	0.171189	NA	NA	0.674785	0.0372369	NA	NA	0.0343956
GO_MEMBRANE_DEPOLARIZATION	NA	NA	NA	NA	NA	NA	NA	NA	0.0230232	0.38749	NA	NA	NA	NA	NA	NA	0.761146	0.0240553	NA	NA	0.140166	0.0239996	NA	NA	NA	NA	NA	NA	NA	NA	NA	NA	NA	NA	0.603497	0.0456592	NA	NA	NA	NA	NA	NA	NA	NA	NA	NA	NA	NA	0.0316812
GO_MEMBRANE_DEPOLARIZATION_DURING_ACTION_POTENTIAL	0.0388381	NA	NA	NA	NA	NA	NA	NA	NA	NA	NA	NA	0.611422	0.0198444	0.0236407	0.341779	NA	NA	NA	NA	0.0971366	0.0260183	NA	NA	NA	NA	NA	NA	NA	NA	NA	NA	NA	NA	NA	NA	0.0455232	NA	NA	NA	NA	NA	NA	NA	NA	NA	NA	NA	0.0317715
GO_MEMBRANE_DEPOLARIZATION_DURING_CARDIAC_MUSCLE_CELL_ACTION_POTENTIAL	NA	NA	NA	NA	NA	NA	NA	NA	NA	NA	NA	NA	0.444218	0.0496382	0.00639396	0.228853	NA	NA	NA	NA	0.280959	0.0105112	NA	NA	NA	NA	0.0281312	NA	NA	NA	NA	NA	0.208159	0.0218749	NA	NA	0.0187999	NA	NA	NA	NA	NA	NA	NA	NA	NA	NA	NA	NA
GO_MEMBRANE_DISASSEMBLY	NA	NA	NA	NA	NA	NA	NA	0.0245089	NA	NA	NA	0.00940097	NA	NA	NA	NA	NA	NA	NA	NA	NA	NA	NA	NA	NA	NA	NA	NA	NA	NA	NA	NA	NA	NA	NA	NA	NA	NA	NA	NA	NA	NA	NA	NA	NA	NA	NA	0.0240501	NA
GO_MEMBRANE_DOCKING	NA	NA	NA	NA	NA	NA	0.0267964	0.299918	NA	NA	NA	NA	0.0161278	0.774945	NA	NA	NA	NA	NA	NA	0.473522	0.00768423	NA	NA	0.00252476	0.225963	NA	NA	NA	NA	NA	NA	NA	NA	0.0099955	0.46836	NA	NA	0.578097	0.00290049	NA	NA	NA	NA	0.0205449	0.220478	0.0125772	0.762016	NA
GO_MEMBRANE_FISSION	NA	NA	NA	NA	NA	NA	NA	NA	NA	NA	NA	NA	NA	NA	NA	NA	NA	NA	NA	NA	NA	NA	NA	NA	NA	NA	NA	NA	NA	NA	NA	NA	NA	NA	NA	NA	NA	NA	NA	NA	NA	NA	NA	NA	NA	NA	NA	NA	NA
GO_MEMBRANE_FUSION	NA	NA	NA	NA	NA	NA	NA	NA	NA	NA	NA	NA	NA	NA	NA	NA	NA	NA	NA	NA	NA	NA	NA	NA	NA	NA	0.0132623	0.80112	NA	NA	NA	NA	NA	NA	NA	NA	NA	NA	NA	NA	NA	NA	NA	NA	NA	NA	0.328846	0.0448539	NA
GO_MEMBRANE_LIPID_BIOSYNTHETIC_PROCESS	NA	NA	0.556147	0.0389217	NA	NA	NA	NA	NA	NA	NA	NA	NA	NA	NA	NA	0.00217329	0.493486	0.0226614	0.076307	NA	NA	0.692909	0.0227564	0.00746257	NA	NA	NA	NA	NA	0.00772493	0.182004	0.0167917	0.43283	NA	NA	0.000431157	0.150591	0.505476	0.0450334	NA	NA	NA	NA	NA	NA	NA	NA	NA
GO_MEMBRANE_LIPID_CATABOLIC_PROCESS	NA	NA	NA	NA	0.0761071	0.0169813	NA	NA	0.0295819	NA	NA	NA	NA	NA	NA	NA	NA	NA	NA	NA	0.0166593	NA	NA	NA	NA	NA	NA	NA	NA	NA	NA	NA	NA	NA	NA	NA	NA	NA	NA	NA	0.0203937	0.440727	NA	NA	NA	NA	NA	NA	NA
GO_MEMBRANE_LIPID_METABOLIC_PROCESS	NA	NA	NA	NA	NA	NA	NA	NA	NA	NA	NA	NA	NA	NA	0.0659686	0.0328064	0.000512721	0.530271	NA	NA	NA	NA	0.505499	0.0197361	0.00267541	NA	NA	NA	NA	NA	0.0125587	0.0618547	NA	NA	NA	NA	0.000158017	0.128712	0.638412	0.00579498	NA	NA	NA	NA	NA	NA	NA	NA	NA
GO_MEMBRANE_PROTEIN_ECTODOMAIN_PROTEOLYSIS	NA	NA	NA	NA	NA	NA	NA	NA	NA	NA	NA	NA	NA	NA	NA	NA	NA	NA	NA	NA	NA	NA	0.0441351	NA	NA	NA	NA	NA	NA	NA	NA	NA	NA	NA	NA	NA	NA	NA	NA	NA	NA	0.0256317	NA	NA	NA	NA	NA	NA	NA
GO_MEMBRANE_PROTEIN_INTRACELLULAR_DOMAIN_PROTEOLYSIS	NA	NA	NA	NA	NA	NA	NA	NA	NA	NA	NA	NA	NA	NA	NA	NA	NA	NA	NA	NA	NA	NA	NA	NA	NA	NA	NA	NA	NA	NA	NA	NA	NA	NA	NA	NA	NA	NA	NA	NA	NA	NA	NA	NA	NA	NA	NA	NA	NA
GO_MEMBRANE_RAFT_ORGANIZATION	NA	NA	NA	NA	NA	NA	NA	NA	NA	NA	0.0333221	0.215028	NA	NA	NA	NA	NA	NA	0.0871293	0.00168578	NA	NA	NA	NA	0.0130599	NA	NA	NA	NA	NA	NA	NA	NA	NA	NA	NA	0.213961	0.0232264	NA	NA	NA	NA	NA	NA	NA	NA	NA	NA	NA
GO_MEMBRANE_REGION	NA	NA	NA	NA	NA	NA	NA	NA	NA	NA	NA	NA	NA	NA	NA	NA	0.168178	0.00943796	NA	NA	NA	NA	NA	NA	NA	NA	NA	NA	NA	NA	NA	NA	0.675737	0.00242645	NA	NA	NA	NA	0.22407	0.0106104	NA	NA	NA	NA	0.775553	0.0414325	NA	NA	NA
GO_MEMBRANE_REPOLARIZATION	NA	NA	NA	NA	NA	NA	NA	NA	NA	NA	NA	NA	NA	NA	0.0484924	0.425368	NA	NA	NA	NA	0.504987	0.00446747	NA	NA	NA	NA	NA	NA	NA	NA	NA	NA	NA	NA	NA	NA	0.0010671	NA	NA	NA	NA	NA	NA	NA	NA	NA	NA	NA	NA
GO_MEMBRANE_REPOLARIZATION_DURING_ACTION_POTENTIAL	NA	NA	NA	NA	NA	NA	NA	NA	NA	NA	NA	NA	NA	NA	NA	NA	NA	NA	NA	NA	NA	NA	NA	NA	NA	NA	NA	NA	NA	NA	NA	NA	NA	NA	NA	NA	0.00285716	NA	NA	NA	NA	NA	NA	NA	NA	NA	NA	NA	NA
GO_MEMBRANE_REPOLARIZATION_DURING_VENTRICULAR_CARDIAC_MUSCLE_CELL_ACTION_POTENTIAL	NA	NA	NA	NA	NA	NA	NA	NA	NA	NA	NA	NA	NA	NA	NA	NA	NA	NA	NA	NA	NA	NA	NA	NA	NA	NA	NA	NA	NA	NA	NA	NA	NA	NA	NA	NA	NA	NA	NA	NA	NA	NA	NA	NA	NA	NA	NA	NA	NA
GO_MEMORY	NA	NA	NA	NA	NA	NA	NA	NA	NA	NA	NA	NA	NA	NA	NA	NA	NA	NA	NA	NA	NA	NA	NA	NA	NA	NA	NA	NA	NA	NA	NA	NA	0.034314	0.704272	NA	NA	NA	NA	NA	NA	NA	NA	NA	NA	NA	NA	NA	NA	NA
GO_MESENCHYMAL_CELL_DIFFERENTIATION	NA	NA	NA	NA	NA	NA	NA	NA	NA	NA	NA	NA	NA	NA	NA	NA	NA	NA	NA	NA	NA	NA	NA	NA	NA	NA	NA	NA	NA	NA	NA	NA	0.674921	0.0277239	NA	NA	NA	NA	NA	NA	NA	NA	NA	NA	NA	NA	0.905844	0.000212471	0.00795722
GO_MESENCHYMAL_CELL_PROLIFERATION	NA	0.0247024	0.0179981	0.428627	NA	NA	NA	NA	NA	NA	NA	NA	0.00481273	0.500334	NA	NA	NA	NA	NA	NA	NA	NA	NA	NA	NA	NA	NA	NA	NA	NA	0.404396	0.00961714	NA	NA	NA	NA	NA	NA	NA	NA	NA	NA	NA	NA	NA	0.0208304	NA	NA	0.0436173
GO_MESENCHYME_DEVELOPMENT	NA	NA	NA	NA	NA	NA	NA	NA	NA	NA	NA	NA	NA	NA	NA	NA	NA	NA	NA	NA	NA	NA	NA	NA	NA	NA	NA	NA	NA	NA	NA	NA	NA	NA	NA	NA	NA	NA	NA	NA	NA	NA	NA	NA	NA	NA	0.734854	0.000152623	0.0230014
GO_MESENCHYME_MORPHOGENESIS	NA	NA	NA	NA	NA	NA	NA	NA	NA	NA	NA	NA	NA	NA	NA	NA	NA	NA	NA	NA	NA	NA	NA	NA	NA	NA	NA	NA	NA	NA	NA	NA	NA	NA	NA	NA	NA	NA	NA	NA	NA	NA	NA	NA	NA	NA	0.593257	0.0446019	NA
GO_MESODERM_DEVELOPMENT	NA	NA	NA	NA	NA	NA	NA	NA	NA	NA	NA	NA	NA	NA	NA	NA	NA	NA	NA	NA	NA	NA	NA	NA	NA	NA	NA	NA	NA	NA	NA	NA	NA	NA	NA	NA	NA	NA	NA	NA	NA	NA	NA	NA	NA	NA	NA	NA	NA
GO_MESODERM_MORPHOGENESIS	NA	NA	NA	NA	NA	NA	NA	NA	NA	NA	NA	NA	NA	NA	NA	NA	NA	NA	NA	NA	NA	NA	NA	NA	NA	NA	NA	NA	NA	NA	NA	NA	NA	NA	NA	NA	NA	NA	NA	NA	NA	NA	NA	NA	NA	NA	NA	NA	NA
GO_MESODERMAL_CELL_DIFFERENTIATION	NA	NA	NA	NA	NA	NA	NA	NA	NA	NA	NA	NA	NA	NA	NA	NA	NA	NA	NA	NA	NA	NA	NA	NA	NA	NA	NA	NA	NA	NA	0.337736	0.0476021	NA	NA	NA	NA	NA	NA	NA	NA	NA	NA	NA	NA	NA	NA	NA	NA	NA
GO_MESODERMAL_CELL_FATE_SPECIFICATION	NA	NA	NA	NA	NA	NA	NA	NA	NA	NA	NA	NA	0.0411421	NA	NA	NA	NA	NA	NA	NA	NA	NA	NA	NA	NA	NA	NA	NA	NA	NA	NA	NA	NA	NA	NA	NA	NA	NA	NA	NA	NA	NA	NA	NA	NA	NA	NA	NA	NA
GO_MESONEPHRIC_TUBULE_MORPHOGENESIS	NA	NA	NA	NA	NA	NA	NA	NA	NA	NA	NA	NA	NA	NA	NA	NA	NA	NA	NA	NA	NA	NA	NA	NA	NA	NA	NA	NA	NA	NA	0.0421759	0.484997	NA	NA	NA	NA	NA	NA	NA	0.0492453	NA	NA	NA	NA	NA	NA	NA	NA	NA
GO_MESONEPHROS_DEVELOPMENT	NA	NA	NA	NA	NA	NA	NA	NA	NA	NA	NA	NA	NA	NA	NA	NA	NA	NA	NA	NA	NA	NA	NA	NA	NA	NA	NA	NA	NA	NA	0.0328301	0.274854	NA	NA	NA	NA	NA	NA	NA	NA	NA	NA	NA	NA	NA	NA	NA	NA	NA
GO_METAL_CLUSTER_BINDING	NA	NA	NA	NA	NA	NA	NA	NA	NA	NA	NA	NA	NA	NA	NA	NA	NA	NA	0.00896885	0.743657	NA	NA	NA	NA	NA	NA	NA	NA	NA	NA	NA	NA	NA	NA	NA	NA	NA	NA	NA	NA	NA	NA	NA	NA	NA	NA	NA	NA	NA
GO_METAL_ION_PROTON_ANTIPORTER_ACTIVITY	NA	NA	NA	NA	NA	NA	NA	NA	NA	NA	NA	NA	NA	NA	NA	NA	NA	NA	NA	NA	NA	NA	NA	NA	NA	NA	NA	NA	NA	NA	NA	NA	NA	NA	NA	NA	NA	NA	NA	NA	NA	NA	NA	NA	NA	NA	NA	NA	NA
GO_METAL_ION_TRANSMEMBRANE_TRANSPORTER_ACTIVITY	NA	NA	NA	NA	NA	NA	NA	NA	NA	NA	NA	NA	NA	NA	NA	NA	NA	NA	0.709889	0.0268666	NA	NA	NA	NA	NA	NA	NA	NA	NA	NA	NA	NA	NA	NA	NA	NA	NA	NA	NA	NA	NA	NA	NA	NA	NA	NA	NA	NA	NA
GO_METALLOAMINOPEPTIDASE_ACTIVITY	NA	NA	NA	NA	NA	NA	NA	NA	NA	NA	NA	NA	NA	NA	NA	NA	NA	NA	NA	NA	NA	NA	NA	NA	NA	NA	NA	NA	NA	NA	NA	NA	NA	NA	NA	NA	NA	NA	NA	NA	NA	NA	NA	0.0272395	0.0325162	NA	NA	NA	NA
GO_METALLOENDOPEPTIDASE_ACTIVITY	NA	NA	NA	NA	NA	NA	NA	NA	NA	NA	0.11817	0.00333255	NA	NA	NA	NA	NA	NA	NA	NA	NA	NA	NA	NA	NA	NA	NA	NA	NA	NA	NA	NA	NA	NA	NA	NA	0.0177745	NA	NA	NA	NA	NA	NA	NA	NA	NA	NA	NA	NA
GO_METALLOEXOPEPTIDASE_ACTIVITY	NA	NA	NA	NA	NA	NA	NA	NA	NA	NA	NA	NA	NA	NA	NA	NA	NA	NA	NA	NA	NA	NA	NA	NA	0.124099	0.0206231	NA	NA	NA	NA	NA	NA	NA	NA	NA	NA	NA	NA	NA	NA	NA	NA	NA	NA	0.0403533	0.577517	NA	NA	NA
GO_METALLOPEPTIDASE_ACTIVITY	NA	NA	NA	NA	NA	NA	NA	NA	NA	NA	0.348706	0.00842679	NA	NA	NA	NA	NA	NA	NA	NA	NA	NA	NA	NA	NA	NA	NA	NA	NA	NA	NA	NA	NA	NA	NA	NA	0.00820923	NA	NA	NA	NA	NA	NA	NA	0.0253608	0.721019	NA	NA	NA
GO_METAPHASE_ANAPHASE_TRANSITION_OF_CELL_CYCLE	NA	NA	NA	NA	NA	NA	NA	NA	NA	NA	NA	NA	NA	NA	NA	NA	NA	NA	NA	NA	NA	NA	NA	NA	NA	NA	NA	NA	NA	NA	NA	0.0221341	NA	NA	NA	NA	NA	NA	NA	NA	NA	NA	NA	NA	NA	NA	NA	NA	NA
GO_METAPHASE_PLATE_CONGRESSION	NA	NA	NA	NA	NA	NA	NA	NA	NA	NA	NA	NA	NA	NA	NA	NA	NA	NA	NA	NA	NA	NA	NA	NA	NA	NA	NA	NA	NA	NA	NA	NA	NA	NA	0.126176	0.00199861	NA	NA	NA	NA	NA	NA	NA	NA	NA	NA	NA	NA	NA
GO_METENCEPHALON_DEVELOPMENT	NA	NA	NA	NA	NA	NA	NA	NA	NA	NA	NA	NA	0.7858	0.0333993	NA	NA	NA	NA	NA	NA	NA	NA	NA	NA	NA	NA	NA	NA	NA	NA	NA	NA	NA	NA	NA	NA	NA	NA	NA	NA	NA	NA	NA	NA	NA	NA	NA	NA	NA
GO_METHIONINE_BIOSYNTHETIC_PROCESS	NA	NA	0.00964003	NA	NA	NA	0.0153172	NA	NA	NA	NA	NA	NA	NA	NA	NA	NA	NA	NA	NA	NA	NA	NA	NA	NA	NA	NA	NA	NA	NA	0.00831893	0.113507	NA	NA	NA	NA	NA	NA	NA	NA	NA	NA	NA	NA	NA	NA	NA	NA	NA
GO_METHIONINE_METABOLIC_PROCESS	NA	NA	0.016956	NA	NA	NA	0.0266982	NA	NA	NA	NA	NA	NA	NA	NA	NA	NA	NA	NA	NA	NA	NA	NA	NA	NA	NA	NA	NA	NA	NA	0.0146681	0.148418	NA	NA	NA	NA	NA	NA	NA	NA	NA	NA	NA	NA	NA	NA	NA	NA	NA
GO_METHYL_CPG_BINDING	NA	NA	NA	NA	0.251767	0.0459332	NA	NA	NA	NA	NA	0.0206013	NA	NA	NA	NA	NA	NA	NA	NA	NA	NA	NA	NA	NA	NA	NA	NA	NA	NA	NA	NA	NA	NA	NA	NA	NA	NA	NA	NA	0.00572656	0.307113	0.0325162	0.228851	NA	NA	NA	NA	NA
GO_METHYLATED_HISTONE_BINDING	NA	NA	NA	NA	NA	NA	NA	NA	NA	NA	NA	NA	NA	NA	0.0283438	0.541853	NA	NA	0.37936	0.0125084	NA	NA	NA	NA	NA	NA	NA	NA	0.0259054	0.485676	0.00870188	0.151283	NA	NA	NA	NA	NA	NA	NA	NA	0.021658	0.652171	NA	NA	NA	NA	NA	NA	NA
GO_METHYLATION	NA	NA	NA	NA	NA	NA	0.0782619	0.00189925	0.0339356	0.181393	NA	NA	NA	NA	NA	NA	NA	NA	0.0121057	0.214227	0.0403579	0.461721	0.00080087	0.510364	0.0126419	0.438176	0.0273672	0.275689	NA	NA	NA	NA	0.035012	0.509082	NA	NA	NA	NA	NA	NA	NA	NA	NA	NA	NA	NA	NA	NA	NA
GO_METHYLOSOME	NA	NA	NA	NA	NA	NA	NA	NA	NA	NA	NA	NA	0.263886	0.0144869	NA	NA	NA	NA	NA	NA	NA	NA	NA	NA	NA	NA	NA	NA	NA	NA	NA	NA	NA	NA	NA	NA	NA	NA	NA	NA	NA	NA	NA	NA	NA	NA	NA	NA	NA
GO_METHYLTRANSFERASE_COMPLEX	NA	NA	NA	NA	NA	NA	NA	NA	NA	NA	NA	NA	NA	NA	NA	NA	NA	NA	NA	NA	0.0630527	0.00568882	NA	NA	NA	NA	NA	NA	NA	NA	0.00784942	0.0880349	NA	NA	0.656229	0.0136252	NA	NA	NA	NA	NA	NA	0.0363289	NA	NA	NA	NA	NA	NA
GO_MHC_CLASS_I_PROTEIN_BINDING	NA	NA	NA	NA	NA	NA	NA	NA	NA	NA	NA	NA	NA	NA	NA	NA	NA	NA	NA	NA	NA	NA	NA	NA	NA	NA	NA	NA	NA	NA	NA	NA	NA	NA	NA	NA	NA	NA	NA	NA	NA	NA	NA	0.0231199	NA	NA	NA	NA	NA
GO_MHC_CLASS_II_BIOSYNTHETIC_PROCESS	NA	NA	NA	NA	NA	NA	NA	NA	NA	NA	0.163257	0.00940097	NA	NA	NA	NA	NA	NA	NA	NA	NA	NA	NA	NA	NA	NA	NA	NA	NA	NA	NA	NA	NA	NA	NA	NA	NA	NA	NA	NA	NA	NA	NA	NA	NA	NA	NA	NA	NA
GO_MHC_PROTEIN_BINDING	NA	NA	NA	NA	NA	NA	NA	0.0265414	NA	NA	NA	NA	NA	NA	0.0328751	NA	NA	NA	NA	NA	NA	NA	NA	NA	NA	NA	NA	NA	NA	NA	NA	NA	NA	NA	NA	NA	NA	NA	NA	NA	NA	NA	NA	0.0103644	NA	NA	NA	NA	NA
GO_MHC_PROTEIN_COMPLEX	NA	NA	NA	NA	NA	NA	NA	NA	NA	NA	NA	NA	NA	NA	0.0649269	0.0317828	NA	NA	NA	NA	NA	NA	NA	NA	NA	NA	NA	NA	NA	NA	NA	NA	NA	NA	NA	NA	NA	NA	NA	NA	NA	NA	NA	NA	NA	NA	NA	NA	NA
GO_MHC_PROTEIN_COMPLEX_BINDING	NA	NA	NA	NA	NA	NA	NA	NA	NA	NA	NA	NA	NA	NA	NA	NA	NA	NA	NA	NA	NA	NA	NA	NA	NA	NA	NA	NA	NA	NA	NA	NA	NA	NA	NA	NA	NA	NA	NA	NA	NA	NA	NA	0.0294018	NA	NA	NA	NA	NA
GO_MICROBODY	NA	NA	NA	NA	0.809965	0.000818246	NA	NA	NA	NA	NA	NA	0.132871	0.00581225	0.402168	0.0193189	0.165887	0.0373613	NA	NA	NA	NA	NA	NA	NA	NA	NA	NA	NA	NA	0.477596	0.0486885	0.160973	0.0486885	0.0127218	0.701095	NA	NA	NA	NA	NA	NA	0.0237197	0.0608166	0.484499	0.0102808	NA	NA	0.64748
GO_MICROBODY_LUMEN	NA	NA	NA	NA	0.466812	0.0384723	NA	NA	NA	NA	NA	NA	NA	NA	NA	NA	NA	NA	NA	NA	NA	0.0485222	NA	NA	NA	NA	NA	NA	NA	NA	NA	NA	NA	NA	NA	NA	NA	NA	NA	NA	NA	NA	NA	NA	NA	NA	NA	NA	NA
GO_MICROBODY_MEMBRANE	NA	NA	NA	NA	NA	NA	NA	NA	NA	NA	NA	NA	NA	NA	0.26528	0.00461433	0.610678	0.022666	NA	NA	NA	NA	NA	NA	NA	NA	NA	NA	NA	NA	NA	NA	0.122818	0.0221341	NA	NA	NA	NA	NA	NA	NA	NA	NA	NA	0.511464	0.0461396	NA	NA	0.366008
GO_MICROFIBRIL	NA	NA	NA	NA	NA	NA	NA	NA	NA	NA	NA	NA	NA	NA	NA	NA	NA	NA	NA	NA	NA	NA	NA	NA	NA	NA	NA	NA	NA	NA	NA	NA	NA	NA	NA	NA	NA	NA	NA	NA	NA	NA	NA	NA	NA	0.00744463	NA	NA	NA
GO_MICROFILAMENT_MOTOR_ACTIVITY	NA	NA	NA	NA	NA	NA	NA	NA	NA	NA	NA	NA	NA	NA	NA	NA	NA	NA	NA	NA	NA	NA	NA	NA	NA	NA	NA	NA	NA	NA	NA	NA	NA	NA	NA	NA	NA	NA	NA	NA	NA	NA	NA	NA	NA	NA	NA	NA	NA
GO_MICROTUBULE	NA	NA	NA	NA	0.893401	0.0471713	NA	NA	0.0840811	0.0116914	NA	NA	0.649243	0.000473368	NA	NA	NA	NA	0.579012	0.0283386	NA	NA	NA	NA	NA	NA	NA	NA	NA	NA	0.0128895	0.931434	0.440098	0.0115917	NA	NA	NA	NA	NA	NA	NA	NA	NA	NA	NA	NA	0.864257	0.0152022	NA
GO_MICROTUBULE_ANCHORING	NA	NA	NA	0.042297	NA	NA	NA	NA	NA	NA	NA	NA	0.0269047	NA	NA	NA	NA	NA	NA	NA	NA	NA	NA	NA	NA	NA	NA	NA	NA	NA	NA	NA	0.231918	0.0275581	NA	NA	NA	NA	NA	NA	0.331655	0.0069289	NA	NA	0.0377045	NA	NA	NA	NA
GO_MICROTUBULE_ANCHORING_AT_CENTROSOME	NA	NA	NA	NA	NA	NA	NA	NA	NA	NA	NA	NA	NA	NA	NA	NA	NA	NA	NA	NA	NA	NA	NA	NA	NA	NA	NA	NA	NA	NA	NA	NA	NA	NA	NA	NA	NA	NA	NA	NA	NA	NA	NA	NA	0.00590936	NA	NA	NA	NA
GO_MICROTUBULE_ANCHORING_AT_MICROTUBULE_ORGANIZING_CENTER	NA	NA	NA	0.00964003	NA	NA	NA	NA	NA	NA	NA	NA	NA	NA	NA	NA	NA	NA	NA	NA	NA	NA	NA	NA	NA	NA	NA	NA	NA	NA	NA	NA	NA	NA	NA	NA	NA	NA	NA	NA	NA	NA	NA	NA	0.00853292	NA	NA	NA	NA
GO_MICROTUBULE_ASSOCIATED_COMPLEX	NA	NA	NA	NA	NA	NA	0.0146486	0.0990227	NA	NA	NA	NA	NA	NA	NA	NA	NA	NA	NA	NA	NA	NA	NA	NA	0.0336647	NA	NA	NA	NA	NA	NA	NA	NA	NA	NA	NA	NA	NA	NA	NA	NA	NA	NA	NA	NA	NA	NA	NA	NA
GO_MICROTUBULE_BASED_MOVEMENT	NA	NA	NA	NA	NA	NA	NA	NA	NA	NA	NA	NA	0.0837867	0.0134305	NA	NA	0.349927	0.0347085	NA	NA	NA	NA	NA	NA	NA	NA	NA	NA	NA	NA	NA	NA	NA	NA	0.314508	0.0158725	NA	NA	NA	NA	NA	NA	NA	NA	NA	NA	NA	NA	NA
GO_MICROTUBULE_BASED_TRANSPORT	NA	NA	0.911628	0.0338596	NA	NA	0.087187	0.0278477	NA	NA	NA	NA	NA	NA	NA	NA	0.175726	0.00753638	NA	NA	NA	NA	NA	NA	NA	NA	NA	NA	NA	NA	NA	NA	NA	NA	0.573702	0.000273244	NA	NA	NA	NA	NA	NA	NA	NA	NA	NA	NA	NA	NA
GO_MICROTUBULE_BINDING	NA	NA	NA	NA	NA	NA	0.0282255	0.115324	NA	NA	NA	NA	NA	NA	0.283512	0.0304526	0.0088877	0.0505831	0.883282	0.042143	NA	NA	NA	NA	NA	NA	0.0331399	0.718217	NA	NA	NA	NA	NA	NA	NA	NA	NA	NA	NA	NA	0.115324	0.0496054	NA	NA	NA	NA	NA	NA	NA
GO_MICROTUBULE_BUNDLE_FORMATION	NA	NA	NA	NA	NA	NA	NA	NA	NA	NA	NA	NA	NA	NA	NA	NA	NA	NA	NA	NA	NA	NA	NA	NA	NA	NA	NA	NA	NA	NA	NA	NA	NA	NA	NA	NA	NA	NA	NA	NA	NA	NA	NA	NA	NA	0.0464445	NA	NA	NA
GO_MICROTUBULE_CYTOSKELETON_ORGANIZATION_INVOLVED_IN_MITOSIS	NA	NA	NA	0.0361169	NA	NA	0.0291955	0.381432	NA	NA	0.214259	0.0110351	NA	NA	NA	NA	NA	NA	NA	NA	NA	0.00300875	NA	NA	0.0210509	0.733503	0.00630567	0.747221	NA	NA	0.0272372	0.05651	NA	NA	0.427682	0.00168851	NA	NA	NA	NA	NA	NA	NA	NA	NA	NA	NA	NA	NA
GO_MICROTUBULE_DEPOLYMERIZATION	NA	NA	NA	NA	NA	NA	NA	NA	NA	NA	NA	NA	NA	NA	NA	NA	NA	NA	NA	NA	NA	NA	NA	NA	NA	NA	NA	NA	NA	NA	NA	NA	NA	NA	NA	NA	NA	NA	NA	NA	NA	NA	NA	NA	NA	0.0234179	NA	NA	NA
GO_MICROTUBULE_END	NA	NA	NA	NA	NA	NA	NA	NA	NA	NA	NA	NA	NA	NA	NA	NA	NA	NA	NA	NA	NA	NA	NA	NA	NA	NA	NA	NA	NA	NA	NA	NA	NA	NA	NA	NA	NA	NA	NA	NA	NA	NA	NA	NA	NA	NA	NA	0.0016988	NA
GO_MICROTUBULE_MINUS_END_BINDING	NA	NA	NA	NA	NA	NA	0.0153172	0.169651	0.0184327	0.162816	0.00748801	NA	0.263886	0.0144869	0.183168	0.00769196	NA	NA	NA	NA	NA	NA	NA	NA	NA	NA	NA	NA	NA	NA	NA	NA	NA	NA	NA	NA	NA	NA	NA	NA	NA	NA	NA	NA	NA	NA	NA	0.0137662	NA
GO_MICROTUBULE_MOTOR_ACTIVITY	NA	NA	NA	NA	NA	NA	0.0356377	0.331994	NA	NA	NA	NA	NA	NA	NA	NA	NA	NA	NA	NA	NA	NA	NA	NA	0.0160838	NA	NA	NA	NA	NA	NA	NA	NA	NA	NA	NA	NA	0.0332566	NA	NA	NA	NA	NA	NA	NA	NA	NA	NA	NA
GO_MICROTUBULE_NUCLEATION	NA	NA	NA	NA	NA	NA	NA	NA	0.0143942	0.34927	NA	0.0294068	0.00574091	0.366888	NA	NA	0.365921	0.0148457	NA	NA	NA	NA	NA	NA	0.0175985	0.233191	NA	NA	NA	NA	NA	NA	0.254967	0.0337638	NA	NA	NA	NA	NA	NA	NA	NA	NA	NA	0.04603	NA	NA	NA	NA
GO_MICROTUBULE_NUCLEATION_BY_MICROTUBULE_ORGANIZING_CENTER	NA	NA	NA	NA	NA	NA	NA	NA	0.012865	NA	NA	NA	NA	NA	NA	NA	NA	NA	NA	NA	NA	NA	NA	NA	NA	NA	NA	NA	NA	NA	NA	NA	NA	NA	NA	NA	NA	NA	NA	NA	NA	NA	NA	NA	NA	NA	NA	NA	NA
GO_MICROTUBULE_ORGANIZING_CENTER_ATTACHMENT_SITE	NA	NA	NA	NA	NA	NA	0.0129002	0.156683	NA	NA	NA	NA	NA	NA	NA	NA	NA	NA	NA	0.0196172	NA	NA	NA	NA	NA	NA	NA	NA	NA	NA	NA	NA	NA	NA	NA	NA	NA	NA	NA	NA	NA	NA	NA	NA	NA	NA	NA	NA	NA
GO_MICROTUBULE_ORGANIZING_CENTER_LOCALIZATION	NA	NA	NA	NA	NA	NA	NA	NA	NA	NA	NA	0.0332784	NA	NA	NA	NA	NA	NA	NA	NA	NA	NA	0.0252238	0.203231	NA	NA	NA	NA	NA	NA	NA	NA	NA	NA	0.26995	0.0299479	NA	NA	NA	0.0120492	NA	NA	NA	NA	0.00577967	NA	NA	NA	NA
GO_MICROTUBULE_ORGANIZING_CENTER_ORGANIZATION	NA	NA	NA	NA	0.807639	0.00350143	NA	NA	NA	NA	NA	NA	NA	NA	NA	NA	NA	NA	NA	NA	NA	NA	NA	NA	NA	NA	NA	NA	NA	NA	NA	NA	0.399676	0.0476235	0.158547	0.0316334	NA	NA	0.478622	0.00627149	0.0187136	0.152264	NA	NA	0.218666	0.0359113	NA	NA	NA
GO_MICROTUBULE_PLUS_END	NA	NA	NA	NA	NA	0.0424986	NA	NA	NA	NA	NA	NA	NA	NA	NA	NA	NA	NA	NA	NA	NA	NA	NA	NA	NA	NA	NA	NA	NA	NA	NA	NA	NA	NA	NA	NA	NA	NA	NA	NA	NA	NA	NA	NA	0.239921	0.0373621	NA	0.0049266	NA
GO_MICROTUBULE_PLUS_END_BINDING	NA	NA	NA	NA	NA	0.0328207	NA	NA	0.301169	0.0343556	NA	NA	NA	NA	NA	NA	0.269569	0.00521544	NA	NA	NA	NA	NA	NA	NA	NA	NA	NA	NA	NA	NA	NA	NA	NA	NA	NA	NA	NA	NA	NA	NA	NA	NA	NA	0.0230858	NA	NA	0.0365967	NA
GO_MICROTUBULE_POLYMERIZATION	NA	NA	NA	NA	NA	NA	0.0356377	0.69728	0.01193	0.312956	0.576471	0.00569541	NA	NA	0.727589	0.0110531	0.11864	0.012493	NA	NA	NA	NA	NA	NA	0.0160838	0.506324	NA	NA	NA	NA	NA	NA	0.182379	0.00740146	NA	NA	NA	NA	NA	NA	NA	NA	NA	NA	NA	NA	0.381027	0.00113019	NA
GO_MICROTUBULE_POLYMERIZATION_OR_DEPOLYMERIZATION	NA	NA	NA	NA	NA	NA	0.0408339	0.539163	NA	NA	0.140474	0.0235074	0.0756524	0.000506995	0.584853	0.043	NA	NA	NA	NA	NA	NA	NA	NA	0.0251355	0.658253	0.0454555	NA	NA	NA	NA	NA	0.330866	0.00641771	NA	NA	NA	NA	NA	NA	NA	NA	NA	NA	NA	NA	0.598231	0.00902212	NA
GO_MICROVILLUS	NA	NA	0.0302491	NA	NA	NA	NA	NA	NA	NA	NA	NA	NA	NA	NA	NA	NA	NA	NA	NA	NA	NA	NA	NA	NA	NA	NA	NA	NA	NA	NA	NA	NA	NA	NA	0.0481684	NA	NA	NA	NA	NA	NA	NA	NA	NA	NA	NA	NA	NA
GO_MICROVILLUS_ASSEMBLY	NA	NA	NA	NA	NA	NA	0.0299414	NA	NA	NA	NA	NA	NA	NA	NA	NA	NA	NA	NA	NA	NA	NA	NA	NA	NA	NA	NA	NA	NA	NA	NA	NA	NA	NA	NA	NA	NA	NA	NA	NA	NA	NA	NA	NA	NA	NA	NA	NA	NA
GO_MICROVILLUS_MEMBRANE	NA	NA	NA	NA	NA	NA	NA	NA	NA	NA	NA	NA	NA	NA	NA	NA	NA	NA	NA	NA	NA	NA	NA	NA	NA	NA	NA	NA	NA	NA	NA	NA	NA	NA	NA	NA	NA	NA	NA	NA	NA	NA	NA	NA	NA	NA	NA	NA	NA
GO_MIDBODY	NA	NA	NA	NA	0.0687889	0.00483189	NA	NA	NA	NA	NA	NA	NA	NA	NA	NA	NA	NA	NA	NA	NA	NA	NA	NA	0.0242618	0.0851281	NA	NA	NA	NA	NA	NA	NA	NA	0.843477	0.0220401	NA	NA	NA	NA	NA	NA	NA	0.0472374	NA	NA	NA	NA	NA
GO_MIDBRAIN_DEVELOPMENT	NA	NA	NA	NA	NA	NA	NA	NA	NA	NA	NA	NA	NA	NA	0.0182958	NA	NA	NA	NA	NA	NA	NA	NA	NA	NA	NA	NA	NA	NA	NA	NA	NA	NA	NA	NA	NA	NA	NA	NA	NA	NA	NA	NA	NA	NA	NA	0.463616	0.0126598	0.0316812
GO_MIDDLE_EAR_MORPHOGENESIS	NA	NA	NA	NA	NA	NA	NA	NA	NA	NA	NA	NA	NA	NA	NA	NA	NA	NA	NA	NA	NA	NA	NA	NA	NA	NA	NA	NA	NA	NA	NA	NA	NA	NA	NA	NA	NA	NA	NA	NA	NA	NA	NA	NA	NA	NA	NA	NA	NA
GO_MINERALOCORTICOID_METABOLIC_PROCESS	NA	NA	NA	NA	NA	NA	NA	NA	NA	NA	NA	NA	NA	NA	NA	NA	NA	NA	NA	NA	NA	NA	NA	NA	NA	NA	NA	NA	NA	NA	NA	NA	NA	NA	NA	NA	NA	NA	NA	NA	NA	NA	NA	NA	NA	NA	NA	NA	NA
GO_MIRNA_BINDING	NA	NA	NA	NA	NA	NA	NA	NA	NA	NA	NA	NA	0.0459807	NA	NA	NA	NA	NA	NA	NA	NA	NA	NA	NA	NA	NA	0.30813	0.0367341	NA	NA	0.313905	0.0404565	NA	NA	NA	NA	NA	NA	NA	NA	NA	NA	NA	NA	NA	NA	0.0171106	NA	NA
GO_MIRNA_CATABOLIC_PROCESS	NA	NA	NA	NA	NA	NA	NA	NA	NA	NA	NA	NA	NA	NA	NA	NA	NA	NA	NA	NA	NA	NA	NA	NA	NA	NA	NA	NA	NA	NA	NA	NA	NA	NA	NA	NA	NA	NA	NA	NA	NA	NA	NA	NA	0.00590936	NA	NA	NA	NA
GO_MIRNA_METABOLIC_PROCESS	NA	NA	NA	NA	NA	NA	0.385588	0.0107358	NA	NA	NA	NA	NA	NA	NA	NA	NA	NA	NA	NA	NA	NA	NA	NA	NA	0.0303614	NA	0.0326137	NA	NA	0.297546	0.00326475	NA	NA	NA	NA	NA	NA	NA	NA	NA	NA	NA	NA	0.0489417	NA	0.0143607	NA	NA
GO_MISMATCH_REPAIR	NA	NA	NA	NA	0.010575	0.422562	NA	NA	NA	NA	NA	NA	NA	NA	NA	NA	NA	NA	NA	NA	NA	NA	0.0367834	0.243113	NA	NA	NA	NA	NA	NA	NA	NA	NA	NA	NA	NA	NA	NA	NA	NA	NA	NA	NA	NA	NA	NA	NA	NA	NA
GO_MISMATCH_REPAIR_COMPLEX	NA	NA	NA	NA	NA	NA	NA	NA	NA	NA	NA	NA	NA	NA	NA	NA	NA	NA	NA	NA	NA	NA	NA	NA	NA	NA	NA	NA	NA	NA	NA	NA	NA	NA	NA	NA	NA	NA	NA	NA	NA	NA	NA	NA	NA	NA	NA	NA	NA
GO_MISMATCHED_DNA_BINDING	NA	NA	NA	NA	NA	NA	NA	NA	0.0248295	0.187257	NA	NA	NA	NA	NA	NA	NA	NA	NA	NA	NA	NA	0.00539174	0.0974729	0.0285789	NA	NA	NA	NA	NA	0.151891	0.00834408	NA	NA	NA	NA	NA	NA	NA	NA	NA	NA	NA	NA	NA	NA	NA	NA	NA
GO_MITOCHONDRIAL_CALCIUM_ION_TRANSMEMBRANE_TRANSPORT	NA	NA	NA	0.0393642	NA	NA	NA	NA	NA	NA	NA	NA	NA	NA	NA	NA	NA	NA	NA	NA	NA	NA	NA	NA	NA	NA	NA	NA	NA	NA	NA	NA	NA	NA	NA	NA	NA	NA	NA	NA	NA	NA	0.0350728	0.237162	0.0350728	NA	NA	NA	NA
GO_MITOCHONDRIAL_CYTOCHROME_C_OXIDASE_ASSEMBLY	NA	NA	NA	NA	NA	NA	NA	NA	0.325782	0.0409784	NA	NA	NA	NA	NA	NA	NA	NA	NA	NA	NA	NA	NA	NA	NA	NA	NA	NA	NA	NA	NA	NA	NA	NA	NA	NA	NA	NA	NA	0.0061768	NA	0.0433553	NA	NA	NA	NA	NA	NA	NA
GO_MITOCHONDRIAL_DEPOLARIZATION	NA	NA	NA	0.036513	NA	NA	NA	NA	NA	NA	NA	NA	NA	NA	NA	NA	0.314073	0.00878274	NA	NA	NA	NA	NA	NA	NA	NA	NA	NA	NA	NA	NA	NA	NA	NA	NA	NA	NA	NA	NA	NA	NA	NA	NA	NA	NA	NA	NA	NA	NA
GO_MITOCHONDRIAL_DNA_METABOLIC_PROCESS	NA	NA	NA	NA	NA	NA	0.00131722	NA	NA	NA	NA	NA	NA	NA	NA	NA	NA	NA	NA	NA	0.0164023	NA	NA	NA	NA	NA	0.0108222	NA	NA	NA	NA	NA	NA	NA	NA	NA	NA	NA	NA	NA	NA	NA	NA	NA	NA	0.0145352	NA	NA	NA
GO_MITOCHONDRIAL_DNA_REPLICATION	NA	NA	NA	NA	NA	NA	NA	NA	0.0215316	0.175127	NA	NA	NA	NA	NA	NA	NA	NA	NA	NA	NA	NA	NA	NA	NA	NA	0.00934603	NA	NA	NA	NA	NA	NA	NA	NA	NA	NA	NA	NA	NA	NA	NA	NA	NA	NA	NA	NA	NA	NA
GO_MITOCHONDRIAL_FISSION	NA	NA	NA	NA	NA	NA	NA	NA	NA	NA	NA	NA	0.658067	0.00410168	NA	NA	0.138972	0.000894107	NA	NA	NA	NA	NA	0.00354489	NA	NA	NA	NA	NA	NA	NA	NA	0.000833655	0.344276	NA	NA	NA	NA	NA	NA	0.0265414	0.133071	NA	NA	0.0884222	0.0184092	NA	NA	NA
GO_MITOCHONDRIAL_FUSION	NA	NA	NA	0.0453088	NA	NA	NA	NA	NA	NA	NA	NA	NA	NA	NA	NA	0.0657567	0.0122005	0.405161	0.0164376	0.0560884	0.0143278	0.194401	0.0164665	NA	NA	NA	NA	NA	NA	NA	NA	0.0301367	0.237528	NA	NA	NA	NA	NA	NA	NA	NA	NA	NA	NA	NA	NA	NA	NA
GO_MITOCHONDRIAL_GENE_EXPRESSION	NA	NA	NA	NA	NA	NA	0.932016	0.042419	NA	NA	NA	NA	NA	NA	NA	NA	NA	NA	NA	NA	NA	NA	NA	NA	NA	NA	NA	NA	NA	NA	NA	NA	NA	NA	NA	NA	NA	NA	NA	NA	NA	NA	NA	NA	NA	NA	NA	NA	NA
GO_MITOCHONDRIAL_GENOME_MAINTENANCE	NA	NA	NA	NA	0.242665	0.0424986	0.00575862	NA	NA	NA	NA	0.0189987	NA	NA	0.321517	0.0271976	NA	NA	NA	NA	NA	NA	0.168168	0.0120965	NA	NA	0.0281312	NA	NA	NA	NA	NA	NA	NA	NA	NA	NA	NA	NA	NA	0.00506771	0.296433	0.00244117	0.220451	NA	0.0373621	NA	NA	0.160143
GO_MITOCHONDRIAL_LARGE_RIBOSOMAL_SUBUNIT	0.0123569	NA	NA	NA	NA	NA	NA	NA	NA	NA	NA	NA	NA	NA	NA	NA	NA	NA	0.0231631	NA	NA	NA	NA	NA	NA	NA	NA	NA	NA	NA	NA	NA	NA	NA	NA	NA	NA	NA	0.0302048	0.265106	NA	NA	NA	NA	NA	NA	NA	NA	NA
GO_MITOCHONDRIAL_MATRIX	NA	NA	NA	NA	NA	NA	NA	NA	0.221421	0.0105732	NA	NA	NA	NA	NA	NA	0.456913	0.0473895	0.00957595	0.243983	0.0389557	0.834123	NA	NA	NA	NA	NA	NA	NA	NA	0.023829	0.698734	NA	NA	0.000331671	0.39822	0.441652	0.0295666	0.00738863	0.469885	0.0010998	0.291258	NA	NA	NA	NA	NA	NA	NA
GO_MITOCHONDRIAL_MEMBRANE_ORGANIZATION	NA	NA	NA	0.0343185	NA	NA	0.669243	0.0226014	NA	NA	NA	NA	NA	NA	NA	NA	NA	NA	NA	NA	NA	NA	NA	NA	NA	NA	0.0237563	0.151979	NA	NA	NA	NA	0.420743	0.0140792	NA	NA	NA	NA	NA	NA	NA	NA	NA	NA	NA	NA	NA	NA	NA
GO_MITOCHONDRIAL_OUTER_MEMBRANE_PERMEABILIZATION	NA	NA	NA	0.0322462	NA	NA	NA	NA	NA	NA	NA	NA	NA	NA	NA	NA	NA	NA	NA	NA	0.00774799	NA	NA	NA	NA	NA	NA	NA	NA	NA	NA	NA	NA	NA	NA	NA	NA	NA	NA	NA	NA	NA	NA	NA	NA	NA	NA	NA	NA
GO_MITOCHONDRIAL_PROTEIN_COMPLEX	0.025109	0.181683	NA	NA	NA	NA	NA	NA	NA	NA	NA	NA	NA	NA	NA	NA	0.784293	0.00315952	NA	NA	NA	NA	NA	NA	NA	NA	NA	NA	NA	NA	NA	NA	NA	NA	NA	NA	0.0363475	0.697973	0.00872184	0.763041	NA	NA	NA	NA	NA	NA	NA	NA	NA
GO_MITOCHONDRIAL_PROTEIN_PROCESSING	NA	0.00227649	NA	NA	NA	NA	NA	NA	NA	NA	NA	NA	NA	NA	NA	NA	NA	NA	NA	NA	NA	NA	NA	NA	NA	NA	NA	NA	NA	NA	NA	NA	NA	NA	NA	NA	NA	NA	NA	NA	NA	NA	NA	NA	0.0100061	NA	NA	NA	NA
GO_MITOCHONDRIAL_RESPIRATORY_CHAIN_COMPLEX_ASSEMBLY	NA	NA	NA	NA	NA	NA	NA	NA	NA	NA	NA	NA	NA	NA	NA	NA	NA	NA	NA	NA	NA	NA	NA	NA	NA	NA	NA	NA	0.81276	0.0167059	0.00696302	0.641741	NA	NA	NA	NA	NA	NA	NA	NA	NA	NA	0.70451	0.0244642	NA	NA	NA	NA	NA
GO_MITOCHONDRIAL_RESPIRATORY_CHAIN_COMPLEX_III_ASSEMBLY	NA	NA	NA	NA	NA	NA	NA	NA	NA	NA	NA	NA	NA	NA	NA	NA	NA	NA	NA	NA	NA	NA	NA	NA	NA	NA	NA	NA	NA	NA	NA	NA	NA	NA	NA	NA	NA	NA	NA	NA	NA	NA	NA	0.00490143	0.00590936	NA	NA	NA	NA
GO_MITOCHONDRIAL_RNA_PROCESSING	NA	NA	NA	NA	NA	NA	NA	NA	NA	NA	NA	NA	NA	NA	NA	NA	NA	0.0366047	NA	NA	NA	NA	NA	NA	NA	NA	NA	NA	NA	NA	NA	NA	NA	NA	NA	NA	NA	NA	NA	NA	NA	NA	NA	NA	NA	NA	NA	NA	NA
GO_MITOCHONDRIAL_TRANSLATION	0.0275656	0.528659	NA	NA	NA	NA	NA	NA	NA	NA	NA	NA	NA	NA	NA	NA	NA	NA	NA	NA	NA	NA	NA	NA	NA	NA	NA	NA	NA	NA	NA	NA	NA	NA	NA	NA	NA	NA	NA	NA	NA	NA	NA	NA	NA	NA	NA	NA	NA
GO_MITOCHONDRIAL_TRANSLATIONAL_TERMINATION	0.00683401	NA	NA	NA	NA	NA	NA	NA	NA	NA	NA	NA	NA	NA	NA	NA	NA	NA	0.0275666	0.536181	NA	NA	NA	NA	NA	NA	NA	NA	NA	NA	NA	NA	NA	NA	NA	NA	NA	NA	NA	NA	0.0120557	0.744071	NA	NA	NA	NA	NA	NA	NA
GO_MITOCHONDRIAL_TRANSMEMBRANE_TRANSPORT	NA	NA	NA	NA	NA	NA	NA	NA	NA	NA	NA	NA	NA	NA	NA	NA	NA	NA	NA	NA	NA	0.0313675	NA	NA	NA	NA	NA	NA	NA	NA	NA	NA	NA	NA	NA	NA	NA	NA	NA	NA	NA	NA	NA	NA	NA	NA	NA	NA	NA
GO_MITOCHONDRIAL_TRANSPORT	NA	NA	NA	NA	NA	NA	NA	NA	0.350173	0.00700163	NA	NA	0.245944	0.0271592	NA	NA	NA	NA	NA	NA	0.190372	0.0374457	0.366888	0.0146484	0.0157503	0.234286	0.199634	0.0445568	NA	NA	NA	NA	NA	NA	NA	NA	NA	NA	0.370641	0.0156149	NA	NA	NA	NA	NA	NA	NA	NA	NA
GO_MITOCHONDRIAL_TRNA_PROCESSING	NA	NA	NA	NA	NA	NA	NA	NA	NA	NA	NA	NA	NA	NA	NA	NA	NA	NA	NA	NA	NA	NA	NA	NA	NA	NA	NA	NA	NA	NA	NA	NA	NA	NA	NA	NA	NA	NA	NA	NA	NA	NA	NA	NA	NA	NA	NA	NA	NA
GO_MITOCHONDRION_DISTRIBUTION	NA	NA	NA	NA	NA	NA	NA	NA	NA	NA	NA	NA	NA	NA	NA	NA	NA	NA	NA	NA	NA	NA	NA	NA	NA	NA	NA	NA	NA	NA	NA	NA	NA	NA	NA	NA	NA	NA	NA	NA	NA	NA	0.0150393	NA	NA	NA	NA	NA	NA
GO_MITOCHONDRION_LOCALIZATION	NA	NA	NA	0.0202548	0.00222479	0.140811	NA	0.0335692	NA	NA	NA	0.000857388	0.0282597	0.161474	NA	NA	NA	NA	NA	NA	NA	NA	0.308209	0.0443961	NA	NA	NA	NA	NA	NA	NA	NA	NA	NA	NA	NA	NA	NA	NA	NA	0.0335692	0.505202	0.0171474	0.392484	NA	NA	0.0440103	0.154798	NA
GO_MITOCHONDRION_MORPHOGENESIS	NA	NA	NA	NA	NA	NA	0.0523094	0.0481768	NA	NA	NA	NA	0.444218	0.00530831	NA	NA	NA	NA	NA	NA	NA	NA	NA	0.000605035	NA	NA	NA	NA	NA	NA	NA	0.0218749	NA	NA	NA	NA	NA	NA	0.00531459	NA	0.0481768	NA	0.030037	0.220451	NA	NA	NA	NA	NA
GO_MITOGEN_ACTIVATED_PROTEIN_KINASE_BINDING	NA	NA	NA	NA	NA	NA	NA	NA	NA	NA	NA	NA	NA	NA	NA	NA	NA	NA	NA	NA	NA	NA	NA	NA	NA	NA	NA	NA	NA	NA	NA	NA	NA	NA	NA	NA	NA	NA	NA	NA	NA	NA	NA	NA	NA	NA	NA	NA	NA
GO_MITOGEN_ACTIVATED_PROTEIN_KINASE_KINASE_BINDING	NA	NA	NA	NA	NA	NA	NA	NA	NA	NA	NA	NA	NA	NA	NA	NA	NA	NA	NA	NA	NA	NA	NA	NA	NA	NA	NA	NA	NA	NA	NA	NA	NA	NA	NA	NA	0.00615575	NA	NA	NA	NA	NA	NA	NA	NA	NA	NA	NA	NA
GO_MITOGEN_ACTIVATED_PROTEIN_KINASE_KINASE_KINASE_BINDING	NA	NA	NA	NA	NA	NA	NA	NA	0.0398538	NA	NA	NA	NA	NA	NA	NA	NA	NA	NA	NA	NA	NA	NA	NA	NA	NA	NA	NA	NA	NA	NA	NA	NA	NA	NA	NA	NA	NA	NA	NA	NA	NA	NA	NA	NA	NA	NA	NA	NA
GO_MITOPHAGY	NA	NA	NA	0.00372405	NA	NA	0.0607492	0.00643436	NA	NA	NA	0.00154696	0.00330983	0.325658	NA	NA	NA	NA	NA	NA	0.0488291	0.156464	0.0167864	NA	0.0821784	0.00147381	0.032865	0.21181	0.0074988	NA	NA	NA	0.0260976	0.222046	NA	NA	NA	0.021567	NA	NA	NA	NA	NA	0.0294018	NA	NA	0.00866226	0.318527	NA
GO_MITOTIC_CELL_CYCLE_ARREST	NA	NA	NA	NA	NA	NA	0.0299414	0.23157	NA	NA	NA	NA	NA	NA	NA	NA	NA	0.0366047	NA	NA	NA	NA	NA	NA	NA	NA	NA	NA	NA	NA	NA	NA	NA	NA	0.0124704	0.138761	NA	NA	NA	NA	NA	NA	NA	NA	NA	NA	NA	NA	NA
GO_MITOTIC_CELL_CYCLE_CHECKPOINT	NA	NA	0.622345	0.0190161	NA	NA	0.000367386	0.726761	NA	NA	NA	NA	0.792495	0.0464746	NA	NA	NA	NA	0.827665	0.0191426	0.0317132	0.678248	5.64375e-05	0.121559	1.94128e-05	0.193016	0.123111	0.0210183	NA	NA	0.307264	0.0257129	0.23538	0.0257129	NA	NA	NA	NA	NA	NA	0.00421953	0.244765	NA	NA	NA	NA	NA	NA	NA
GO_MITOTIC_CHROMOSOME_CONDENSATION	NA	NA	NA	NA	NA	NA	NA	NA	NA	NA	NA	NA	NA	NA	NA	NA	NA	0.0326791	NA	NA	NA	NA	NA	NA	NA	NA	NA	NA	NA	NA	NA	NA	NA	NA	NA	NA	NA	NA	NA	NA	NA	NA	NA	NA	NA	NA	NA	NA	NA
GO_MITOTIC_CYTOKINESIS	NA	NA	NA	0.0130563	NA	NA	NA	NA	NA	NA	NA	NA	NA	NA	NA	NA	NA	NA	NA	NA	NA	NA	NA	NA	NA	NA	NA	NA	NA	NA	NA	NA	NA	NA	NA	NA	NA	NA	NA	NA	NA	NA	NA	NA	NA	NA	NA	NA	NA
GO_MITOTIC_DNA_INTEGRITY_CHECKPOINT	NA	NA	0.396694	0.00249621	0.0412605	0.0698989	0.00804735	0.496361	NA	NA	NA	NA	NA	NA	NA	NA	NA	NA	NA	NA	0.00448644	NA	0.00173663	0.186396	7.17358e-06	0.258149	0.126743	0.00366186	NA	NA	0.720296	0.0231304	NA	NA	NA	NA	NA	NA	NA	NA	0.00140192	0.489196	NA	NA	NA	NA	NA	NA	0.560149
GO_MITOTIC_DNA_REPLICATION	NA	NA	NA	NA	NA	NA	NA	NA	NA	NA	NA	NA	NA	NA	NA	NA	NA	NA	NA	NA	NA	NA	NA	NA	NA	NA	NA	NA	NA	NA	NA	NA	NA	NA	NA	NA	NA	NA	NA	NA	NA	NA	NA	NA	NA	NA	0.0299597	0.217594	NA
GO_MITOTIC_G1_S_TRANSITION_CHECKPOINT	NA	NA	0.193543	0.000154882	NA	NA	NA	NA	0.682739	0.0145592	0.034058	NA	0.805283	0.0178403	NA	NA	NA	NA	NA	0.0396344	0.00216357	NA	0.00170003	0.374648	0.00139213	0.115437	NA	NA	NA	NA	NA	0.0261846	NA	NA	NA	NA	NA	NA	NA	NA	0.0030156	0.253216	NA	NA	NA	NA	NA	NA	NA
GO_MITOTIC_G2_DNA_DAMAGE_CHECKPOINT	NA	NA	NA	NA	NA	NA	NA	NA	NA	NA	NA	NA	NA	NA	NA	NA	NA	NA	NA	NA	NA	NA	NA	NA	7.88565e-05	NA	NA	NA	NA	NA	NA	NA	NA	0.023709	NA	NA	NA	NA	NA	NA	NA	NA	NA	NA	NA	NA	NA	NA	NA
GO_MITOTIC_G2_M_TRANSITION_CHECKPOINT	NA	NA	NA	NA	NA	NA	NA	NA	NA	NA	NA	NA	NA	NA	NA	NA	NA	NA	NA	NA	NA	NA	NA	NA	2.81331e-05	NA	NA	NA	NA	NA	NA	NA	NA	0.0404565	NA	NA	NA	NA	NA	NA	NA	NA	NA	NA	NA	NA	NA	NA	NA
GO_MITOTIC_METAPHASE_PLATE_CONGRESSION	NA	NA	NA	NA	NA	NA	NA	NA	NA	NA	NA	NA	NA	NA	NA	NA	NA	NA	NA	NA	NA	NA	NA	NA	NA	NA	NA	NA	NA	NA	NA	NA	NA	NA	0.379504	0.00803676	NA	NA	NA	NA	NA	NA	NA	NA	NA	NA	NA	NA	NA
GO_MITOTIC_NUCLEAR_DIVISION	NA	NA	NA	NA	NA	NA	NA	NA	NA	NA	NA	NA	NA	NA	NA	NA	NA	NA	NA	NA	NA	NA	NA	NA	0.0414092	0.246061	NA	NA	0.0155471	0.496415	NA	NA	NA	NA	0.531697	0.011134	NA	NA	0.0104306	0.778103	NA	NA	NA	NA	NA	NA	NA	NA	NA
GO_MITOTIC_NUCLEAR_ENVELOPE_REASSEMBLY	NA	NA	NA	NA	NA	NA	NA	NA	NA	NA	NA	NA	NA	NA	NA	NA	NA	NA	NA	NA	NA	NA	NA	NA	NA	NA	NA	NA	NA	NA	NA	NA	NA	NA	NA	NA	NA	NA	NA	NA	NA	NA	NA	NA	NA	NA	NA	NA	NA
GO_MITOTIC_RECOMBINATION	NA	NA	NA	NA	NA	NA	NA	NA	NA	NA	NA	NA	NA	NA	NA	NA	NA	NA	NA	NA	NA	NA	NA	NA	NA	NA	NA	NA	NA	NA	NA	NA	NA	NA	NA	NA	NA	NA	NA	NA	NA	NA	NA	NA	NA	NA	NA	NA	0.153743
GO_MITOTIC_SISTER_CHROMATID_COHESION	NA	NA	NA	NA	NA	NA	NA	NA	NA	NA	NA	NA	NA	NA	0.0695835	0.0341813	NA	NA	NA	NA	NA	NA	NA	NA	NA	NA	0.258621	0.0249727	NA	NA	NA	NA	NA	NA	NA	NA	NA	NA	NA	NA	0.331655	0.000594827	NA	NA	NA	NA	NA	NA	NA
GO_MITOTIC_SISTER_CHROMATID_SEGREGATION	NA	NA	NA	NA	NA	NA	NA	NA	NA	NA	NA	NA	NA	NA	NA	NA	NA	NA	NA	NA	NA	NA	NA	NA	NA	NA	NA	NA	NA	NA	NA	NA	NA	NA	NA	NA	NA	NA	NA	NA	NA	NA	NA	NA	NA	NA	NA	NA	NA
GO_MITOTIC_SPINDLE	NA	NA	NA	NA	0.214778	0.00309406	0.0207451	0.335354	0.211418	0.0467412	0.434463	0.0353074	NA	NA	0.654485	0.0172222	NA	NA	NA	NA	0.852335	0.0128328	NA	NA	NA	NA	0.195305	0.0378112	0.0216268	0.135389	NA	NA	NA	NA	NA	NA	NA	NA	NA	NA	NA	NA	NA	NA	NA	NA	NA	NA	NA
GO_MITOTIC_SPINDLE_ASSEMBLY	NA	NA	NA	NA	0.544504	0.0141172	NA	NA	NA	NA	NA	NA	NA	NA	NA	NA	NA	NA	NA	NA	NA	NA	NA	NA	0.00808685	0.448814	NA	NA	NA	NA	NA	NA	NA	NA	NA	NA	NA	NA	NA	NA	NA	NA	NA	NA	NA	NA	NA	NA	NA
GO_MITOTIC_SPINDLE_MIDZONE	NA	NA	NA	NA	NA	NA	NA	NA	NA	0.0174307	NA	NA	NA	NA	NA	NA	NA	NA	NA	NA	NA	NA	NA	NA	NA	NA	NA	NA	NA	NA	NA	NA	NA	NA	NA	NA	NA	NA	NA	NA	NA	NA	NA	NA	NA	NA	NA	NA	NA
GO_MITOTIC_SPINDLE_ORGANIZATION	NA	NA	NA	0.0170253	0.760581	0.0275922	NA	NA	NA	NA	NA	NA	0.0781045	0.0378894	NA	NA	NA	NA	NA	NA	NA	NA	NA	NA	0.00765974	0.661385	0.0466459	NA	NA	NA	NA	NA	0.0317142	0.330089	0.334553	0.0200597	NA	NA	NA	NA	NA	NA	0.164761	0.0387657	NA	NA	NA	NA	NA
GO_MITOTIC_SPINDLE_POLE	NA	NA	NA	NA	NA	NA	NA	NA	NA	NA	0.284174	0.0313187	NA	NA	NA	NA	NA	NA	NA	NA	NA	0.0175239	NA	NA	NA	NA	NA	NA	NA	NA	NA	NA	NA	0.0359423	NA	NA	NA	NA	NA	NA	NA	NA	NA	NA	NA	NA	NA	NA	NA
GO_MKS_COMPLEX	0.0051887	NA	0.0112986	0.152307	NA	NA	NA	NA	NA	NA	NA	0.00622294	NA	NA	NA	NA	NA	NA	0.0245564	NA	NA	NA	NA	NA	0.00172624	0.11217	0.00934603	NA	NA	NA	NA	NA	NA	NA	NA	NA	NA	NA	NA	NA	NA	NA	NA	NA	0.1436	0.0125684	0.00125364	NA	NA
GO_MLL1_2_COMPLEX	NA	NA	NA	NA	NA	NA	NA	NA	NA	NA	NA	NA	NA	NA	NA	NA	NA	NA	NA	NA	0.340284	0.000977796	NA	NA	NA	NA	NA	NA	0.378376	0.0312443	0.0449525	0.252703	NA	NA	NA	NA	NA	NA	NA	NA	NA	NA	0.00478057	NA	NA	NA	NA	NA	NA
GO_MLL3_4_COMPLEX	NA	NA	NA	NA	NA	NA	NA	NA	0.0215316	NA	NA	NA	NA	NA	NA	NA	NA	NA	NA	NA	NA	NA	NA	NA	0.00172624	NA	NA	NA	NA	NA	NA	NA	NA	NA	NA	NA	NA	NA	NA	NA	NA	NA	NA	NA	NA	NA	NA	NA	NA
GO_MODIFICATION_DEPENDENT_PROTEIN_BINDING	NA	NA	NA	NA	NA	NA	NA	NA	0.0555962	0.00755872	NA	NA	NA	NA	0.0438282	0.246807	NA	NA	0.167988	0.0350515	0.00159063	0.648243	0.000228369	0.101507	0.0281349	0.0514509	0.00839394	0.76812	0.00360021	0.0596551	NA	NA	NA	NA	NA	NA	NA	NA	NA	NA	0.0310711	0.677159	0.272355	0.00631225	NA	NA	NA	NA	NA
GO_MODIFICATION_OF_POSTSYNAPTIC_STRUCTURE	NA	NA	NA	NA	NA	NA	NA	NA	NA	NA	NA	NA	NA	NA	NA	NA	NA	NA	NA	NA	NA	NA	NA	NA	NA	NA	NA	NA	NA	NA	NA	NA	NA	NA	NA	NA	NA	NA	NA	NA	NA	NA	NA	NA	NA	NA	0.00335702	NA	NA
GO_MODIFICATION_OF_SYNAPTIC_STRUCTURE	NA	NA	NA	NA	NA	NA	NA	NA	NA	NA	NA	NA	NA	NA	NA	NA	NA	NA	NA	NA	NA	NA	NA	NA	NA	NA	NA	NA	NA	NA	NA	NA	NA	NA	NA	NA	NA	NA	NA	NA	NA	NA	NA	NA	NA	NA	0.00771933	NA	NA
GO_MODIFIED_AMINO_ACID_BINDING	0.040627	NA	NA	NA	NA	NA	NA	NA	NA	NA	NA	NA	0.026183	0.166577	NA	NA	NA	NA	0.245504	0.034932	NA	NA	0.514098	0.0281841	NA	NA	NA	NA	NA	NA	NA	NA	NA	NA	NA	NA	NA	NA	NA	NA	NA	NA	NA	NA	NA	NA	0.0045027	0.398765	NA
GO_MODIFIED_AMINO_ACID_TRANSMEMBRANE_TRANSPORTER_ACTIVITY	NA	NA	NA	NA	NA	NA	NA	NA	NA	NA	NA	NA	NA	NA	NA	NA	NA	NA	NA	NA	NA	NA	NA	NA	NA	NA	NA	NA	NA	NA	NA	NA	NA	NA	NA	NA	NA	NA	NA	NA	0.03728	0.263398	NA	NA	NA	NA	0.0453647	NA	NA
GO_MODIFIED_AMINO_ACID_TRANSPORT	NA	NA	NA	NA	NA	NA	NA	NA	NA	NA	NA	NA	NA	NA	NA	NA	NA	NA	NA	NA	NA	NA	NA	NA	NA	NA	NA	NA	NA	NA	NA	NA	NA	NA	NA	NA	NA	NA	NA	NA	NA	NA	NA	NA	NA	NA	NA	NA	NA
GO_MODULATION_BY_HOST_OF_SYMBIONT_PROCESS	NA	NA	NA	NA	NA	NA	NA	NA	NA	NA	NA	NA	NA	NA	0.00375689	NA	NA	NA	0.00648893	NA	NA	NA	NA	NA	NA	NA	NA	NA	NA	NA	NA	NA	0.0247633	0.463828	NA	NA	NA	NA	NA	NA	NA	NA	0.0372585	0.143716	NA	NA	NA	NA	NA
GO_MODULATION_BY_HOST_OF_VIRAL_GENOME_REPLICATION	NA	NA	NA	NA	NA	NA	NA	NA	NA	NA	NA	NA	NA	NA	NA	NA	NA	NA	NA	NA	NA	NA	NA	NA	NA	NA	NA	NA	NA	NA	NA	0.0136668	NA	NA	NA	NA	NA	NA	NA	NA	NA	NA	NA	NA	NA	NA	NA	NA	NA
GO_MODULATION_BY_HOST_OF_VIRAL_PROCESS	NA	NA	NA	NA	NA	NA	NA	NA	NA	NA	NA	NA	NA	NA	0.00148957	NA	NA	NA	NA	NA	NA	NA	NA	NA	NA	NA	NA	NA	NA	NA	NA	0.0359423	NA	NA	NA	NA	NA	NA	NA	NA	NA	NA	NA	NA	NA	NA	NA	NA	NA
GO_MODULATION_BY_SYMBIONT_OF_ENTRY_INTO_HOST	NA	NA	NA	NA	NA	NA	NA	NA	NA	NA	NA	NA	NA	NA	0.00665803	NA	NA	NA	NA	NA	0.0260678	NA	NA	NA	NA	NA	NA	NA	NA	NA	NA	NA	NA	NA	NA	NA	NA	NA	NA	NA	NA	NA	NA	NA	NA	NA	NA	NA	NA
GO_MODULATION_BY_SYMBIONT_OF_HOST_CELLULAR_PROCESS	NA	NA	NA	NA	NA	NA	NA	NA	NA	NA	NA	0.0239683	NA	NA	NA	NA	NA	NA	NA	NA	NA	NA	NA	NA	NA	NA	NA	NA	NA	NA	NA	NA	NA	NA	NA	NA	NA	NA	NA	NA	NA	NA	NA	0.0316301	NA	NA	NA	NA	NA
GO_MODULATION_BY_SYMBIONT_OF_HOST_PROCESS	NA	NA	NA	NA	NA	NA	NA	NA	NA	NA	NA	0.0482491	NA	NA	NA	NA	NA	NA	NA	NA	NA	NA	NA	NA	NA	NA	NA	NA	NA	NA	NA	NA	NA	NA	NA	NA	NA	NA	NA	NA	NA	0.0196831	NA	NA	NA	NA	NA	NA	NA
GO_MODULATION_BY_VIRUS_OF_HOST_CELLULAR_PROCESS	NA	NA	NA	NA	NA	NA	NA	NA	NA	NA	NA	0.0131551	NA	NA	NA	NA	NA	NA	NA	NA	NA	NA	NA	NA	NA	NA	NA	NA	NA	NA	NA	NA	NA	NA	NA	NA	NA	NA	NA	NA	NA	NA	NA	0.0174791	NA	NA	NA	NA	NA
GO_MODULATION_BY_VIRUS_OF_HOST_PROCESS	NA	NA	NA	NA	NA	NA	NA	NA	NA	NA	NA	0.0294068	NA	NA	NA	NA	NA	NA	NA	NA	NA	NA	NA	NA	NA	NA	NA	NA	NA	NA	NA	NA	NA	NA	NA	NA	NA	NA	NA	NA	NA	NA	0.292454	0.0386949	0.04603	NA	NA	NA	NA
[truncated: 3,040 more rows]
[truncated: 21 more columns]
