# Supplementary material for: Pan-tissue transcriptome analysis reveals sex-dimorphic human aging
Source: eLife. 2025 Oct 3;13:RP102449. doi: 10.7554/eLife.102449 (PMC12494380; doi:10.7554/eLife.102449)
Supplement: Supplementary file 6. [file elife-102449-supp6.xlsx]

## Sheet:  Adipose-Subcutaneous
Table S6. AMGs across tissues
id	pval	Symbol	Sex
ENSG00000048540.15	0.0189769	LMO3	females
ENSG00000051620.11	5.90693e-07	HEBP2	females
ENSG00000074047.22	0.000581709	GLI2	females
ENSG00000106125.14	8.06261e-05	MINDY4	females
ENSG00000107796.13	0.00765068	ACTA2	females
ENSG00000112936.19	0.0127788	C7	females
ENSG00000135821.19	6.17325e-05	GLUL	females
ENSG00000135917.16	9.89844e-08	SLC19A3	females
ENSG00000138134.12	0.00923242	STAMBPL1	females
ENSG00000144331.20	0.000290233	ZNF385B	females
ENSG00000154263.17	0.0381717	ABCA10	females
ENSG00000163564.15	0.0353767	PYHIN1	females
ENSG00000165730.16	0.00790729	STOX1	females
ENSG00000169710.9	0.0263446	FASN	females
ENSG00000205362.11	0.00417716	MT1A	females
ENSG00000262655.4	1.16208e-05	SPON1	females
ENSG00000006625.18	6.32855e-06	GGCT	males
ENSG00000051620.11	0.0334468	HEBP2	males
ENSG00000072195.15	0.000152314	SPEG	males
ENSG00000074047.22	0.03325	GLI2	males
ENSG00000100344.11	3.29107e-05	PNPLA3	males
ENSG00000101405.3	0.000965	OXT	males
ENSG00000106125.14	0.0125619	MINDY4	males
ENSG00000107968.10	0.00684673	MAP3K8	males
ENSG00000112936.19	0.0313196	C7	males
ENSG00000134463.15	0.0022665	ECHDC3	males
ENSG00000135454.14	0.0206655	B4GALNT1	males
ENSG00000135821.19	4.67752e-06	GLUL	males
ENSG00000138134.12	0.0208291	STAMBPL1	males
ENSG00000140511.12	2.78697e-05	HAPLN3	males
ENSG00000144031.12	0.00409935	ANKRD53	males
ENSG00000154263.17	1.23561e-05	ABCA10	males
ENSG00000163564.15	1.09023e-05	PYHIN1	males
ENSG00000165730.16	0.000307566	STOX1	males
ENSG00000168079.17	0.00224587	SCARA5	males
ENSG00000172057.10	0.0466632	ORMDL3	males
ENSG00000172840.7	0.0106251	PDP2	males
ENSG00000185585.20	0.00202483	OLFML2A	males
ENSG00000205362.11	0.0206598	MT1A	males
ENSG00000254959.6	0.0334468	INMT-MINDY4	males
ENSG00000262655.4	0.00702223	SPON1	males

## Sheet:  Adipose-Visceral(Omentum)
id	pval	Symbol	Sex
ENSG00000010219.13	0.0308971	DYRK4	females
ENSG00000011454.18	0.0390257	RABGAP1	females
ENSG00000055208.19	0.0308971	TAB2	females
ENSG00000057663.16	0.0066493	ATG5	females
ENSG00000074047.22	0.032567	GLI2	females
ENSG00000081818.4	0.0251207	PCDHB4	females
ENSG00000082258.13	0.0066493	CCNT2	females
ENSG00000085511.20	0.018172	MAP3K4	females
ENSG00000091656.19	0.0219547	ZFHX4	females
ENSG00000096872.17	0.045579	IFT74	females
ENSG00000102710.20	0.00418828	SUPT20H	females
ENSG00000106443.17	0.0125218	PHF14	females
ENSG00000108465.15	0.0177267	CDK5RAP3	females
ENSG00000110066.15	0.000603586	KMT5B	females
ENSG00000110274.16	0.032567	CEP164	females
ENSG00000112414.15	0.00269734	ADGRG6	females
ENSG00000112562.19	0.00511034	SMOC2	females
ENSG00000113389.16	0.00171335	NPR3	females
ENSG00000114107.9	0.00513231	CEP70	females
ENSG00000115827.14	0.000983263	DCAF17	females
ENSG00000116874.12	0.0424072	WARS2	females
ENSG00000119048.8	0.0464937	UBE2B	females
ENSG00000119684.16	0.0321165	MLH3	females
ENSG00000120699.13	0.00766395	EXOSC8	females
ENSG00000122008.15	0.0066493	POLK	females
ENSG00000128951.14	0.000829054	DUT	females
ENSG00000130177.16	0.0125218	CDC16	females
ENSG00000132274.16	0.0251207	TRIM22	females
ENSG00000134313.16	0.0177267	KIDINS220	females
ENSG00000134444.15	0.032567	RELCH	females
ENSG00000138641.18	0.0141488	HERC3	females
ENSG00000138735.16	0.0220775	PDE5A	females
ENSG00000138738.11	0.00206561	PRDM5	females
ENSG00000139112.11	0.00111052	GABARAPL1	females
ENSG00000147601.15	0.00418828	TERF1	females
ENSG00000151414.15	0.00653551	NEK7	females
ENSG00000151445.16	0.032567	VIPAS39	females
ENSG00000151461.20	0.00653551	UPF2	females
ENSG00000152223.15	0.000103747	EPG5	females
ENSG00000157657.14	0.0344987	ZNF618	females
ENSG00000162415.7	0.0424072	ZSWIM5	females
ENSG00000162869.16	0.00165247	PPP1R21	females
ENSG00000164073.11	0.00418828	MFSD8	females
ENSG00000164975.15	0.000103747	SNAPC3	females
ENSG00000166432.15	0.0177267	ZMAT1	females
ENSG00000166908.18	0.00821824	PIP4K2C	females
ENSG00000166971.17	0.00259202	AKTIP	females
ENSG00000166986.15	0.0102068	MARS1	females
ENSG00000167701.14	0.0390257	GPT	females
ENSG00000168310.11	0.012237	IRF2	females
ENSG00000168438.15	0.0200472	CDC40	females
ENSG00000169062.15	0.018172	UPF3A	females
ENSG00000174373.16	0.0151763	RALGAPA1	females
ENSG00000181754.7	0.0124182	AMIGO1	females
ENSG00000182179.13	0.0125218	UBA7	females
ENSG00000185418.16	0.0025434	TARS3	females
ENSG00000185885.16	0.00535864	IFITM1	females
ENSG00000188316.15	0.00728654	ENO4	females
ENSG00000188626.6	0.0300706	GOLGA8M	females
ENSG00000196505.11	0.0390257	GDAP2	females
ENSG00000198586.14	0.0268868	TLK1	females
ENSG00000204116.11	0.00338466	CHIC1	females
ENSG00000217128.12	0.00653551	FNIP1	females
ENSG00000219545.11	0.0390257	UMAD1	females
ENSG00000256087.7	0.0125218	ZNF432	females
ENSG00000273173.5	0.0177267	SNURF	females
ENSG00000004766.17	0.00576493	VPS50	males
ENSG00000004975.12	0.00319233	DVL2	males
ENSG00000010219.13	1.98434e-05	DYRK4	males
ENSG00000010270.14	0.000304276	STARD3NL	males
ENSG00000011454.18	0.0138969	RABGAP1	males
ENSG00000028116.18	4.06584e-05	VRK2	males
ENSG00000036549.13	0.000567774	ZZZ3	males
ENSG00000048028.11	0.0190018	USP28	males
ENSG00000048342.17	6.15515e-05	CC2D2A	males
ENSG00000057663.16	0.00429452	ATG5	males
ENSG00000059588.10	4.41384e-06	TARBP1	males
ENSG00000062194.16	0.00892611	GPBP1	males
ENSG00000071794.16	7.42204e-05	HLTF	males
ENSG00000074047.22	0.0101767	GLI2	males
ENSG00000076650.7	0.00576493	GPATCH1	males
ENSG00000076685.19	0.00411024	NT5C2	males
ENSG00000078699.22	0.00258117	CBFA2T2	males
ENSG00000080493.18	8.1407e-05	SLC4A4	males
ENSG00000080503.24	0.0138969	SMARCA2	males
ENSG00000081818.4	0.00441606	PCDHB4	males
ENSG00000082258.13	9.46556e-06	CCNT2	males
ENSG00000083937.10	0.00892611	CHMP2B	males
ENSG00000085511.20	0.000788429	MAP3K4	males
ENSG00000085832.17	0.000607962	EPS15	males
ENSG00000087076.9	0.00576493	HSD17B14	males
ENSG00000087206.17	0.00576493	UIMC1	males
ENSG00000091656.19	1.18625e-05	ZFHX4	males
ENSG00000100099.21	4.37105e-05	HPS4	males
ENSG00000101230.6	5.53562e-05	ISM1	males
ENSG00000101751.10	2.74748e-05	POLI	males
ENSG00000102010.15	7.10272e-08	BMX	males
ENSG00000102710.20	0.00250328	SUPT20H	males
ENSG00000104361.10	6.33394e-06	NIPAL2	males
ENSG00000105053.11	9.90587e-05	VRK3	males
ENSG00000105778.19	0.0117029	AVL9	males
ENSG00000106415.13	0.0190018	GLCCI1	males
ENSG00000106443.17	0.0143742	PHF14	males
ENSG00000107077.19	9.90587e-05	KDM4C	males
ENSG00000108465.15	0.0071814	CDK5RAP3	males
ENSG00000108846.16	0.000304276	ABCC3	males
ENSG00000109576.14	0.0119848	AADAT	males
ENSG00000109680.11	0.00341127	TBC1D19	males
ENSG00000109794.13	3.85887e-08	FAM149A	males
ENSG00000110066.15	0.029358	KMT5B	males
ENSG00000110274.16	0.0185812	CEP164	males
ENSG00000111196.10	0.000342432	MAGOHB	males
ENSG00000111224.14	0.000304276	PARP11	males
ENSG00000111319.13	0.0185812	SCNN1A	males
ENSG00000111371.16	0.00305376	SLC38A1	males
ENSG00000111731.12	0.00305376	C2CD5	males
ENSG00000112167.10	0.00576493	SAYSD1	males
ENSG00000112414.15	0.0138969	ADGRG6	males
ENSG00000112562.19	6.15515e-05	SMOC2	males
ENSG00000113389.16	0.000159245	NPR3	males
ENSG00000113552.16	0.0218561	GNPDA1	males
ENSG00000113966.10	0.00341127	ARL6	males
ENSG00000115252.18	0.00540504	PDE1A	males
ENSG00000115289.14	0.000532748	PCGF1	males
ENSG00000115652.15	0.0101767	UXS1	males
ENSG00000115827.14	0.0249626	DCAF17	males
ENSG00000115947.14	6.96274e-08	ORC4	males
ENSG00000116857.17	0.00319233	TMEM9	males
ENSG00000116874.12	0.00110753	WARS2	males
ENSG00000116984.14	0.000567774	MTR	males
ENSG00000119509.13	4.41384e-06	INVS	males
ENSG00000119537.18	0.000400043	KDSR	males
ENSG00000119684.16	5.53562e-05	MLH3	males
ENSG00000120699.13	5.95529e-07	EXOSC8	males
ENSG00000120798.17	0.0432869	NR2C1	males
ENSG00000122008.15	0.028738	POLK	males
ENSG00000123096.12	0.00736789	SSPN	males
ENSG00000124795.17	0.0334755	DEK	males
ENSG00000128000.17	0.00341127	ZNF780B	males
ENSG00000128654.14	0.0018395	MTX2	males
ENSG00000128951.14	0.00142263	DUT	males
ENSG00000129003.19	0.000304276	VPS13C	males
ENSG00000130177.16	0.000977848	CDC16	males
ENSG00000131115.16	0.00110753	ZNF227	males
ENSG00000131269.19	8.1407e-05	ABCB7	males
ENSG00000131375.10	6.15515e-05	CAPN7	males
ENSG00000132122.12	0.00411024	SPATA6	males
ENSG00000133104.14	0.0363551	SPART	males
ENSG00000134313.16	3.17606e-06	KIDINS220	males
ENSG00000134444.15	0.0363551	RELCH	males
ENSG00000134533.6	0.0101767	RERG	males
ENSG00000135597.19	1.42929e-06	REPS1	males
ENSG00000136504.13	0.00369294	KAT7	males
ENSG00000136874.11	0.0112733	STX17	males
ENSG00000138735.16	0.000304276	PDE5A	males
ENSG00000138738.11	0.000818606	PRDM5	males
ENSG00000139112.11	0.0238552	GABARAPL1	males
ENSG00000139793.18	7.56462e-09	MBNL2	males
ENSG00000140326.13	9.90587e-05	CDAN1	males
ENSG00000140463.14	0.000607962	BBS4	males
ENSG00000143889.16	0.0071814	HNRNPLL	males
ENSG00000144445.17	0.0345258	KANSL1L	males
ENSG00000144908.14	0.00892611	ALDH1L1	males
ENSG00000145388.15	0.0238552	METTL14	males
ENSG00000145723.17	0.000224777	GIN1	males
ENSG00000145782.13	0.0010344	ATG12	males
ENSG00000147535.17	0.0018395	PLPP5	males
ENSG00000148690.12	0.00341127	FRA10AC1	males
ENSG00000149346.15	5.58969e-06	SLX4IP	males
ENSG00000150938.10	1.33376e-05	CRIM1	males
ENSG00000151414.15	0.00736789	NEK7	males
ENSG00000151461.20	0.0039423	UPF2	males
ENSG00000151778.11	4.90359e-07	SERP2	males
ENSG00000152223.15	4.9947e-05	EPG5	males
ENSG00000154330.13	0.000607962	PGM5	males
ENSG00000155016.18	0.000567774	CYP2U1	males
ENSG00000155970.12	0.000325635	MICU3	males
ENSG00000156042.18	0.0334755	CFAP70	males
ENSG00000156650.14	0.00110753	KAT6B	males
ENSG00000156831.8	0.0152485	NSMCE2	males
ENSG00000157259.8	0.00250328	GATAD1	males
ENSG00000157657.14	0.00121549	ZNF618	males
ENSG00000157992.12	0.000426203	KRTCAP3	males
ENSG00000160679.13	4.06584e-05	CHTOP	males
ENSG00000161513.12	0.0185812	FDXR	males
ENSG00000161929.15	0.0018395	SCIMP	males
ENSG00000162415.7	0.00341127	ZSWIM5	males
ENSG00000162869.16	0.0225657	PPP1R21	males
ENSG00000163320.12	0.000178574	CGGBP1	males
ENSG00000163510.14	5.38263e-05	CWC22	males
ENSG00000163686.15	8.68615e-05	ABHD6	males
ENSG00000163848.20	0.00147161	ZNF148	males
ENSG00000164073.11	0.008607	MFSD8	males
ENSG00000164342.13	9.90587e-05	TLR3	males
ENSG00000164941.14	0.000818606	INTS8	males
ENSG00000164975.15	0.00441606	SNAPC3	males
ENSG00000165092.13	6.58501e-09	ALDH1A1	males
ENSG00000165124.18	5.81074e-05	SVEP1	males
ENSG00000166024.14	0.000840019	R3HCC1L	males
ENSG00000166169.17	0.000818606	POLL	males
ENSG00000166171.13	0.00023548	DPCD	males
ENSG00000166432.15	0.0019682	ZMAT1	males
ENSG00000166780.11	0.0190018	BMERB1	males
ENSG00000166908.18	0.0185812	PIP4K2C	males
ENSG00000166971.17	3.85887e-08	AKTIP	males
ENSG00000166986.15	0.0138969	MARS1	males
ENSG00000167701.14	0.00258117	GPT	males
ENSG00000168216.13	0.00341127	LMBRD1	males
ENSG00000168310.11	0.000159245	IRF2	males
ENSG00000168434.13	0.0152485	COG7	males
ENSG00000168438.15	0.0018395	CDC40	males
ENSG00000169062.15	5.53562e-05	UPF3A	males
ENSG00000169519.21	0.0119848	METTL15	males
ENSG00000170290.4	0.0190018	SLN	males
ENSG00000170802.16	0.008607	FOXN2	males
ENSG00000175455.16	0.00607195	CCDC14	males
ENSG00000178028.14	2.74748e-05	DMAP1	males
ENSG00000178567.8	2.91257e-06	EPM2AIP1	males
ENSG00000182179.13	0.000121828	UBA7	males
ENSG00000185418.16	0.00949728	TARS3	males
ENSG00000185885.16	0.000567774	IFITM1	males
ENSG00000186153.17	0.00121549	WWOX	males
ENSG00000188177.14	0.00635912	ZC3H6	males
ENSG00000188316.15	0.000210098	ENO4	males
ENSG00000188321.13	0.00147161	ZNF559	males
ENSG00000188554.15	1.98434e-05	NBR1	males
ENSG00000188626.6	0.0334755	GOLGA8M	males
ENSG00000189298.14	0.0253813	ZKSCAN3	males
ENSG00000196505.11	2.01235e-06	GDAP2	males
ENSG00000196975.16	0.0159998	ANXA4	males
ENSG00000197062.11	2.46174e-05	ZSCAN26	males
ENSG00000197599.12	0.0143742	CCDC154	males
ENSG00000197608.11	5.53562e-05	ZNF841	males
ENSG00000197713.15	0.0238552	RPE	males
ENSG00000198399.15	4.41384e-06	ITSN2	males
ENSG00000198408.14	0.00441606	OGA	males
ENSG00000198586.14	0.00892611	TLK1	males
ENSG00000198799.12	0.0101767	LRIG2	males
ENSG00000198947.16	9.90587e-05	DMD	males
ENSG00000198961.10	0.00540504	PJA2	males
ENSG00000203965.13	1.3643e-05	EFCAB7	males
ENSG00000204963.6	0.0010344	PCDHA7	males
ENSG00000204965.9	0.00258117	PCDHA5	males
ENSG00000204969.7	2.21041e-07	PCDHA2	males
ENSG00000204970.10	0.00949728	PCDHA1	males
ENSG00000205629.12	0.00892611	LCMT1	males
ENSG00000205758.12	3.03749e-05	CRYZL1	males
ENSG00000214265.11	4.9947e-05	AC124312.1	males
ENSG00000214290.8	9.46556e-06	COLCA2	males
ENSG00000215252.11	0.000701453	GOLGA8B	males
ENSG00000219545.11	0.00147161	UMAD1	males
ENSG00000237765.8	7.8668e-09	FAM200B	males
ENSG00000249115.9	0.0152485	HAUS5	males
ENSG00000253304.2	0.00147161	TMEM200B	males
ENSG00000255408.4	0.0218561	PCDHA3	males
ENSG00000256087.7	0.0249626	ZNF432	males
ENSG00000266964.6	0.00258117	FXYD1	males
ENSG00000273173.5	1.62131e-08	SNURF	males
ENSG00000279983.1	0.00258117	AC244517.10	males
ENSG00000285708.1	0.00369294	AC097634.4	males
ENSG00000287542.1	0.0218561	AC098582.1	males

## Sheet:  Artery-Aorta
id	pval	Symbol	Sex
ENSG00000018625.15	0.00017415	ATP1A2	females
ENSG00000059804.16	0.00604799	SLC2A3	females
ENSG00000064205.10	7.81952e-06	CCN5	females
ENSG00000074590.13	0.00122104	NUAK1	females
ENSG00000078053.17	0.00198283	AMPH	females
ENSG00000091428.18	0.000688703	RAPGEF4	females
ENSG00000099337.5	0.00196064	KCNK6	females
ENSG00000099849.15	0.0116116	RASSF7	females
ENSG00000102452.18	0.0304965	NALCN	females
ENSG00000102466.16	0.00349433	FGF14	females
ENSG00000106278.12	0.0432973	PTPRZ1	females
ENSG00000107372.13	0.000847905	ZFAND5	females
ENSG00000107731.12	0.00325305	UNC5B	females
ENSG00000111799.21	4.40938e-05	COL12A1	females
ENSG00000114541.15	7.7258e-06	FRMD4B	females
ENSG00000116194.13	0.0266797	ANGPTL1	females
ENSG00000118432.12	0.000103873	CNR1	females
ENSG00000120251.21	0.00683264	GRIA2	females
ENSG00000123838.11	0.0029776	C4BPA	females
ENSG00000126878.13	0.00090993	AIF1L	females
ENSG00000131378.14	0.0016897	RFTN1	females
ENSG00000134574.12	0.0173704	DDB2	females
ENSG00000134775.15	0.0241859	FHOD3	females
ENSG00000135916.16	0.0241859	ITM2C	females
ENSG00000136542.9	0.0432973	GALNT5	females
ENSG00000138650.9	0.00154163	PCDH10	females
ENSG00000139292.13	0.0173704	LGR5	females
ENSG00000145014.18	0.0200653	TMEM44	females
ENSG00000145431.11	0.0018188	PDGFC	females
ENSG00000146350.14	7.0827e-06	TBC1D32	females
ENSG00000146376.11	0.00908604	ARHGAP18	females
ENSG00000147257.15	0.0122284	GPC3	females
ENSG00000148926.10	0.0122284	ADM	females
ENSG00000151882.11	0.000210064	CCL28	females
ENSG00000152256.14	8.74507e-05	PDK1	females
ENSG00000153898.13	0.0026827	MCOLN2	females
ENSG00000153993.13	0.00186222	SEMA3D	females
ENSG00000155511.18	0.0142945	GRIA1	females
ENSG00000157150.5	0.0116116	TIMP4	females
ENSG00000157152.17	1.94998e-05	SYN2	females
ENSG00000158164.7	0.0281803	TMSB15A	females
ENSG00000159784.18	0.000228194	FAM131B	females
ENSG00000163531.15	0.00138298	NFASC	females
ENSG00000164265.9	0.00448365	SCGB3A2	females
ENSG00000164761.9	0.000688703	TNFRSF11B	females
ENSG00000166448.15	0.00707981	TMEM130	females
ENSG00000166860.3	0.000914642	ZBTB39	females
ENSG00000170442.12	0.00814974	KRT86	females
ENSG00000173218.15	0.00037269	VANGL1	females
ENSG00000173227.14	0.00325305	SYT12	females
ENSG00000173262.12	0.00555369	SLC2A14	females
ENSG00000175048.17	0.000640628	ZDHHC14	females
ENSG00000178163.8	0.0262496	ZNF518B	females
ENSG00000181778.5	0.0108539	TMEM252	females
ENSG00000182752.10	0.00978527	PAPPA	females
ENSG00000183943.6	0.047025	PRKX	females
ENSG00000185008.17	0.0222124	ROBO2	females
ENSG00000185567.7	0.00683264	AHNAK2	females
ENSG00000185633.10	0.047025	NDUFA4L2	females
ENSG00000185760.17	0.000228711	KCNQ5	females
ENSG00000187068.3	0.021691	C3orf70	females
ENSG00000188580.15	0.0313888	NKAIN2	females
ENSG00000188710.3	0.0364468	QRFP	females
ENSG00000197757.8	0.00814974	HOXC6	females
ENSG00000197991.11	0.00978527	AL592490.1	females
ENSG00000198542.14	0.0394633	ITGBL1	females
ENSG00000198929.13	0.0050251	NOS1AP	females
ENSG00000203867.8	0.0356157	RBM20	females
ENSG00000204851.7	9.37171e-07	PNMA8B	females
ENSG00000205363.6	0.00978527	INSYN1	females
ENSG00000205426.10	0.0214593	KRT81	females
ENSG00000213145.10	0.00715837	CRIP1	females
ENSG00000214944.9	0.0126578	ARHGEF28	females
ENSG00000223953.6	0.0050251	C1QTNF5	females
ENSG00000235750.10	0.00604799	KIAA0040	females
ENSG00000244242.2	0.0266797	IFITM10	females
ENSG00000275163.1	0.0169084	AC117457.1	females
ENSG00000078053.17	0.0270626	AMPH	males
ENSG00000084636.18	0.0486296	COL16A1	males
ENSG00000091428.18	0.0486296	RAPGEF4	males
ENSG00000113739.10	0.0192881	STC2	males
ENSG00000120658.13	0.00751632	ENOX1	males
ENSG00000123892.12	0.0411231	RAB38	males
ENSG00000134574.12	0.025153	DDB2	males
ENSG00000147889.18	0.000751749	CDKN2A	males
ENSG00000151882.11	0.000325022	CCL28	males
ENSG00000154277.13	0.0216525	UCHL1	males
ENSG00000154814.14	0.0296213	OXNAD1	males
ENSG00000156675.16	0.0486296	RAB11FIP1	males
ENSG00000162687.19	0.00472013	KCNT2	males
ENSG00000163017.14	0.00772114	ACTG2	males
ENSG00000164265.9	0.0225441	SCGB3A2	males
ENSG00000164850.15	0.00328232	GPER1	males
ENSG00000173218.15	0.038259	VANGL1	males
ENSG00000174501.14	0.0296213	ANKRD36C	males
ENSG00000175600.16	0.0123417	SUGCT	males
ENSG00000183943.6	0.0429745	PRKX	males
ENSG00000185008.17	0.0486296	ROBO2	males
ENSG00000185567.7	0.0486296	AHNAK2	males
ENSG00000187068.3	0.0324006	C3orf70	males
ENSG00000214944.9	0.0438717	ARHGEF28	males
ENSG00000221866.9	0.0108098	PLXNA4	males
ENSG00000273049.1	0.0324006	AC012531.3	males
ENSG00000275163.1	0.0144447	AC117457.1	males

## Sheet:  Artery-Tibial
id	pval	Symbol	Sex
ENSG00000011600.12	9.30844e-05	TYROBP	females
ENSG00000035664.11	0.0495298	DAPK2	females
ENSG00000048052.22	0.00956443	HDAC9	females
ENSG00000064687.13	0.0280422	ABCA7	females
ENSG00000079215.14	0.00823963	SLC1A3	females
ENSG00000081803.16	0.000542462	CADPS2	females
ENSG00000084636.18	0.0225241	COL16A1	females
ENSG00000092929.12	0.0192596	UNC13D	females
ENSG00000099337.5	0.00510418	KCNK6	females
ENSG00000100298.16	0.039648	APOBEC3H	females
ENSG00000102290.22	0.0260553	PCDH11X	females
ENSG00000111404.7	1.7588e-05	RERGL	females
ENSG00000112183.15	0.00922154	RBM24	females
ENSG00000112715.25	0.0237133	VEGFA	females
ENSG00000113296.14	0.016289	THBS4	females
ENSG00000113805.8	0.0149475	CNTN3	females
ENSG00000117154.12	0.0281407	IGSF21	females
ENSG00000119630.14	0.0335692	PGF	females
ENSG00000123685.9	0.00745834	BATF3	females
ENSG00000124813.23	4.34161e-05	RUNX2	females
ENSG00000126264.10	0.0260553	HCST	females
ENSG00000127533.4	0.00214062	F2RL3	females
ENSG00000128917.8	0.00303614	DLL4	females
ENSG00000129167.9	0.00186281	TPH1	females
ENSG00000129450.8	0.0237133	SIGLEC9	females
ENSG00000130751.10	0.000517869	NPAS1	females
ENSG00000133134.12	0.0335692	BEX2	females
ENSG00000134107.5	0.00346214	BHLHE40	females
ENSG00000135480.16	0.00222563	KRT7	females
ENSG00000135976.20	0.000596997	ANKRD36	females
ENSG00000136378.15	0.0335692	ADAMTS7	females
ENSG00000137462.9	0.000245106	TLR2	females
ENSG00000137752.24	0.00172752	CASP1	females
ENSG00000140368.13	0.00303614	PSTPIP1	females
ENSG00000140937.14	0.0436196	CDH11	females
ENSG00000142185.16	0.00752463	TRPM2	females
ENSG00000142347.19	0.0136259	MYO1F	females
ENSG00000142552.8	0.000936026	RCN3	females
ENSG00000148926.10	0.000171228	ADM	females
ENSG00000152229.18	0.0328225	PSTPIP2	females
ENSG00000152669.9	0.00956443	CCNO	females
ENSG00000152784.16	0.00909212	PRDM8	females
ENSG00000155511.18	0.0380293	GRIA1	females
ENSG00000155926.14	0.0280422	SLA	females
ENSG00000159216.19	0.0225241	RUNX1	females
ENSG00000160233.8	0.0337273	LRRC3	females
ENSG00000161513.12	0.0109556	FDXR	females
ENSG00000163751.4	1.56364e-05	CPA3	females
ENSG00000164136.17	0.039648	IL15	females
ENSG00000166428.14	0.0328225	PLD4	females
ENSG00000168071.22	0.000281718	CCDC88B	females
ENSG00000168481.9	0.0123772	LGI3	females
ENSG00000172183.15	0.000424735	ISG20	females
ENSG00000180448.10	0.000936026	ARHGAP45	females
ENSG00000181856.15	0.0108579	SLC2A4	females
ENSG00000182379.10	0.00909212	NXPH4	females
ENSG00000184471.8	0.0058813	C1QTNF8	females
ENSG00000184922.14	0.00823963	FMNL1	females
ENSG00000186517.14	0.0136259	ARHGAP30	females
ENSG00000188313.13	0.0225241	PLSCR1	females
ENSG00000196126.11	0.0225241	HLA-DRB1	females
ENSG00000196739.15	0.0337273	COL27A1	females
ENSG00000197948.11	0.00150811	FCHSD1	females
ENSG00000198736.12	0.0463729	MSRB1	females
ENSG00000204252.14	0.00745834	HLA-DOA	females
ENSG00000213903.9	0.0462976	LTB4R	females
ENSG00000214510.10	0.0237133	SPINK13	females
ENSG00000228727.9	0.0380293	SAPCD1	females
ENSG00000244752.3	0.0225241	CRYBB2	females
ENSG00000258227.7	0.02981	CLEC5A	females
ENSG00000258839.4	0.00487852	MC1R	females
ENSG00000038427.16	0.0462976	VCAN	males
ENSG00000046889.19	0.0058813	PREX2	males
ENSG00000049089.15	0.0128151	COL9A2	males
ENSG00000064195.7	0.0196137	DLX3	males
ENSG00000064547.14	0.0328225	LPAR2	males
ENSG00000064687.13	0.00100198	ABCA7	males
ENSG00000065357.20	0.00399486	DGKA	males
ENSG00000075035.10	0.0436196	WSCD2	males
ENSG00000079215.14	0.00956443	SLC1A3	males
ENSG00000081803.16	0.00399486	CADPS2	males
ENSG00000086730.17	0.00061515	LAT2	males
ENSG00000089639.11	0.00436648	GMIP	males
ENSG00000092929.12	0.00909212	UNC13D	males
ENSG00000099337.5	0.0128151	KCNK6	males
ENSG00000100092.24	0.00251729	SH3BP1	males
ENSG00000107099.16	0.00700705	DOCK8	males
ENSG00000107719.9	0.0337273	PALD1	males
ENSG00000111664.11	0.0136259	GNB3	males
ENSG00000111665.12	0.00752463	CDCA3	males
ENSG00000112936.19	0.016289	C7	males
ENSG00000113805.8	0.00061515	CNTN3	males
ENSG00000115457.10	0.0164329	IGFBP2	males
ENSG00000122122.10	0.0328225	SASH3	males
ENSG00000126264.10	0.0036837	HCST	males
ENSG00000128298.17	6.15942e-08	BAIAP2L2	males
ENSG00000128917.8	0.000515504	DLL4	males
ENSG00000130755.13	0.0323943	GMFG	males
ENSG00000132274.16	0.013782	TRIM22	males
ENSG00000133134.12	0.0196137	BEX2	males
ENSG00000134107.5	0.0380293	BHLHE40	males
ENSG00000134516.18	0.016289	DOCK2	males
ENSG00000135480.16	0.000721178	KRT7	males
ENSG00000135976.20	0.0164329	ANKRD36	males
ENSG00000138587.6	0.0463729	MNS1	males
ENSG00000140511.12	0.00399486	HAPLN3	males
ENSG00000146350.14	0.0058813	TBC1D32	males
ENSG00000154146.13	0.0436196	NRGN	males
ENSG00000155926.14	0.00745834	SLA	males
ENSG00000157766.19	0.0436196	ACAN	males
ENSG00000159251.8	0.0192596	ACTC1	males
ENSG00000160255.18	0.0267734	ITGB2	males
ENSG00000161513.12	0.000829841	FDXR	males
ENSG00000163531.15	0.00399486	NFASC	males
ENSG00000163751.4	0.0172273	CPA3	males
ENSG00000164283.13	0.0128151	ESM1	males
ENSG00000164932.13	0.0244677	CTHRC1	males
ENSG00000166106.3	0.0380293	ADAMTS15	males
ENSG00000167851.15	0.00823963	CD300A	males
ENSG00000168071.22	0.0149475	CCDC88B	males
ENSG00000168918.14	0.00956443	INPP5D	males
ENSG00000178531.6	0.0463729	CTXN1	males
ENSG00000180448.10	0.0463729	ARHGAP45	males
ENSG00000181856.15	0.0305956	SLC2A4	males
ENSG00000182379.10	0.00956443	NXPH4	males
ENSG00000184489.12	0.0136259	PTP4A3	males
ENSG00000185507.21	0.02981	IRF7	males
ENSG00000185633.10	0.0280422	NDUFA4L2	males
ENSG00000189221.10	5.44189e-06	MAOA	males
ENSG00000196739.15	0.0128151	COL27A1	males
ENSG00000198736.12	0.0288591	MSRB1	males
ENSG00000204410.16	0.0026197	MSH5	males
ENSG00000204482.11	0.00823963	LST1	males
ENSG00000213085.10	1.68836e-05	CFAP45	males
ENSG00000213903.9	0.0149475	LTB4R	males
ENSG00000243627.5	0.0305956	SMIM34A	males

## Sheet:  Colon-Transverse
id	pval	Symbol	Sex
ENSG00000010319.7	0.00643665	SEMA3G	females
ENSG00000011566.15	0.0373547	MAP4K3	females
ENSG00000046604.13	0.0139689	DSG2	females
ENSG00000046889.19	0.00631718	PREX2	females
ENSG00000065978.19	0.0120454	YBX1	females
ENSG00000069869.16	0.00593031	NEDD4	females
ENSG00000073803.14	0.0020698	MAP3K13	females
ENSG00000077684.16	0.00125129	JADE1	females
ENSG00000079950.14	0.0082056	STX7	females
ENSG00000080561.14	0.04416	MID2	females
ENSG00000081087.15	0.000590225	OSTM1	females
ENSG00000087206.17	4.95086e-05	UIMC1	females
ENSG00000088876.13	0.0166318	ZNF343	females
ENSG00000089063.15	0.0386588	TMEM230	females
ENSG00000090861.17	0.00254013	AARS1	females
ENSG00000099810.21	0.00925025	MTAP	females
ENSG00000100364.19	0.0204697	KIAA0930	females
ENSG00000102024.18	0.0480383	PLS3	females
ENSG00000102302.8	0.00153338	FGD1	females
ENSG00000102878.17	0.00218801	HSF4	females
ENSG00000103047.8	0.0404895	TANGO6	females
ENSG00000105700.11	0.04416	KXD1	females
ENSG00000106605.11	0.00702198	BLVRA	females
ENSG00000107341.5	0.000735694	UBE2R2	females
ENSG00000107829.15	0.0404895	FBXW4	females
ENSG00000108443.14	0.00125522	RPS6KB1	females
ENSG00000108622.11	0.0020698	ICAM2	females
ENSG00000110108.10	0.00106585	TMEM109	females
ENSG00000110711.10	0.000117347	AIP	females
ENSG00000110841.14	0.00218801	PPFIBP1	females
ENSG00000111077.18	0.038109	TNS2	females
ENSG00000112335.15	0.0476278	SNX3	females
ENSG00000112701.18	0.00711182	SENP6	females
ENSG00000113269.14	0.0287231	RNF130	females
ENSG00000114353.17	0.000892726	GNAI2	females
ENSG00000114416.18	0.00711182	FXR1	females
ENSG00000116095.11	0.0242747	PLEKHA3	females
ENSG00000116678.20	0.0195817	LEPR	females
ENSG00000118960.13	0.00367116	HS1BP3	females
ENSG00000119138.4	0.00420639	KLF9	females
ENSG00000119681.12	7.90646e-06	LTBP2	females
ENSG00000119865.9	0.00501228	CNRIP1	females
ENSG00000120210.8	0.0476278	INSL6	females
ENSG00000120318.16	0.0139689	ARAP3	females
ENSG00000124380.11	0.00494383	SNRNP27	females
ENSG00000125733.18	0.0291675	TRIP10	females
ENSG00000126653.18	0.0199927	NSRP1	females
ENSG00000128245.15	2.01431e-05	YWHAH	females
ENSG00000128274.17	0.0243757	A4GALT	females
ENSG00000128585.18	0.00125129	MKLN1	females
ENSG00000130224.15	0.0279165	LRCH2	females
ENSG00000132274.16	0.0107535	TRIM22	females
ENSG00000133789.15	0.0443936	SWAP70	females
ENSG00000134278.15	0.00494383	SPIRE1	females
ENSG00000136156.15	0.00293098	ITM2B	females
ENSG00000136643.12	4.95086e-05	RPS6KC1	females
ENSG00000137312.15	0.00330617	FLOT1	females
ENSG00000137478.15	0.00501228	FCHSD2	females
ENSG00000138834.14	0.00265251	MAPK8IP3	females
ENSG00000139350.12	0.0386588	NEDD1	females
ENSG00000141425.18	0.0287231	RPRD1A	females
ENSG00000143344.16	0.0334954	RGL1	females
ENSG00000143575.15	0.0499236	HAX1	females
ENSG00000144445.17	0.00218801	KANSL1L	females
ENSG00000144815.16	0.0204697	NXPE3	females
ENSG00000149196.16	0.00572592	HIKESHI	females
ENSG00000150867.14	0.0082056	PIP4K2A	females
ENSG00000153207.16	0.0334954	AHCTF1	females
ENSG00000153250.20	0.0334954	RBMS1	females
ENSG00000155099.8	0.0129092	PIP4P2	females
ENSG00000155970.12	0.0334954	MICU3	females
ENSG00000155975.10	0.00952593	VPS37A	females
ENSG00000157764.14	0.0262462	BRAF	females
ENSG00000158092.7	0.00631718	NCK1	females
ENSG00000162430.17	0.0346901	SELENON	females
ENSG00000163001.12	0.0334954	CFAP36	females
ENSG00000163453.11	0.0166318	IGFBP7	females
ENSG00000163512.14	0.0204697	AZI2	females
ENSG00000163513.19	0.0346901	TGFBR2	females
ENSG00000163788.14	0.0386588	SNRK	females
ENSG00000163870.16	0.00593031	TPRA1	females
ENSG00000166289.6	0.00125129	PLEKHF1	females
ENSG00000166848.7	0.0476278	TERF2IP	females
ENSG00000167674.15	0.045947	HDGFL2	females
ENSG00000168234.13	0.00925025	TTC39C	females
ENSG00000168807.16	7.46957e-05	SNTB2	females
ENSG00000169251.13	0.0227983	NMD3	females
ENSG00000169946.14	0.0404895	ZFPM2	females
ENSG00000170275.15	0.0010127	CRTAP	females
ENSG00000170917.14	0.00255335	NUDT6	females
ENSG00000171530.15	0.0120454	TBCA	females
ENSG00000171943.12	0.0291675	SRGAP2C	females
ENSG00000171992.13	0.00163347	SYNPO	females
ENSG00000172331.12	0.0334954	BPGM	females
ENSG00000172667.11	0.000892726	ZMAT3	females
ENSG00000172986.13	0.0204697	GXYLT2	females
ENSG00000173040.13	0.0408475	EVC2	females
ENSG00000175115.13	0.00925025	PACS1	females
ENSG00000176046.9	0.000216051	NUPR1	females
ENSG00000179010.14	0.0216515	MRFAP1	females
ENSG00000182247.10	0.0162909	UBE2E2	females
ENSG00000183722.9	0.00432114	LHFPL6	females
ENSG00000184005.11	0.00166385	ST6GALNAC3	females
ENSG00000186364.12	0.00330628	NUDT17	females
ENSG00000186522.15	0.0386588	SEPTIN10	females
ENSG00000197713.15	0.0386588	RPE	females
ENSG00000198053.12	0.00184566	SIRPA	females
ENSG00000204217.15	0.00925025	BMPR2	females
ENSG00000204272.13	0.0298731	NBDY	females
ENSG00000214113.11	0.00494383	LYRM4	females
ENSG00000214140.11	0.0227983	PRCD	females
ENSG00000244405.8	0.0227983	ETV5	females
ENSG00000255302.5	0.0386588	EID1	females
ENSG00000255529.9	0.045947	POLR2M	females
ENSG00000270106.6	0.0021009	TSNAX-DISC1	females
ENSG00000283930.1	0.0480383	AL117339.4	females
ENSG00000008952.17	0.0484744	SEC62	males
ENSG00000046604.13	0.00875995	DSG2	males
ENSG00000046889.19	0.0164456	PREX2	males
ENSG00000065978.19	0.0137884	YBX1	males
ENSG00000070785.17	0.0218512	EIF2B3	males
ENSG00000073803.14	0.0177723	MAP3K13	males
ENSG00000079950.14	0.0169874	STX7	males
ENSG00000083750.13	0.0320722	RRAGB	males
ENSG00000085465.13	0.00721599	OVGP1	males
ENSG00000085832.17	0.0248855	EPS15	males
ENSG00000089063.15	0.0248014	TMEM230	males
ENSG00000100243.21	0.0396463	CYB5R3	males
ENSG00000104412.8	0.00444809	EMC2	males
ENSG00000104671.8	0.00915043	DCTN6	males
ENSG00000105700.11	0.00292287	KXD1	males
ENSG00000106605.11	0.00580866	BLVRA	males
ENSG00000108854.16	0.0484744	SMURF2	males
ENSG00000109113.20	0.00529397	RAB34	males
ENSG00000110711.10	0.0201543	AIP	males
ENSG00000110811.20	0.0026636	P3H3	males
ENSG00000112130.17	0.0248014	RNF8	males
ENSG00000113269.14	0.00453902	RNF130	males
ENSG00000114416.18	0.0432286	FXR1	males
ENSG00000116044.16	0.00915043	NFE2L2	males
ENSG00000117020.18	0.0396463	AKT3	males
ENSG00000117533.15	0.0169874	VAMP4	males
ENSG00000118960.13	0.00175964	HS1BP3	males
ENSG00000119681.12	0.02864	LTBP2	males
ENSG00000120210.8	0.00915043	INSL6	males
ENSG00000120254.16	0.00148372	MTHFD1L	males
ENSG00000128245.15	0.00733747	YWHAH	males
ENSG00000129038.16	0.0350102	LOXL1	males
ENSG00000131152.4	0.0248014	AC010531.1	males
ENSG00000132256.19	0.000855123	TRIM5	males
ENSG00000134278.15	0.0202806	SPIRE1	males
ENSG00000134371.14	6.8533e-05	CDC73	males
ENSG00000134755.17	0.0201543	DSC2	males
ENSG00000135414.10	0.0484744	GDF11	males
ENSG00000136643.12	0.02864	RPS6KC1	males
ENSG00000139329.5	0.00580866	LUM	males
ENSG00000139436.21	0.00580866	GIT2	males
ENSG00000140044.13	0.0206816	JDP2	males
ENSG00000140367.12	0.0137884	UBE2Q2	males
ENSG00000140718.21	0.0169874	FTO	males
ENSG00000141627.14	0.0301772	DYM	males
ENSG00000141655.17	0.00262918	TNFRSF11A	males
ENSG00000141985.9	0.0248014	SH3GL1	males
ENSG00000143013.13	0.00915043	LMO4	males
ENSG00000143344.16	0.02864	RGL1	males
ENSG00000145623.13	0.0169874	OSMR	males
ENSG00000145730.20	0.0112459	PAM	males
ENSG00000145782.13	0.00875995	ATG12	males
ENSG00000146463.12	0.0256531	ZMYM4	males
ENSG00000146535.14	0.00038409	GNA12	males
ENSG00000153029.14	0.0218512	MR1	males
ENSG00000153207.16	0.0484744	AHCTF1	males
ENSG00000154945.7	0.0202806	ANKRD40	males
ENSG00000162623.16	9.83858e-06	TYW3	males
ENSG00000163512.14	0.0248014	AZI2	males
ENSG00000163513.19	0.00733747	TGFBR2	males
ENSG00000163521.16	0.0100796	GLB1L	males
ENSG00000164172.20	0.0248014	MOCS2	males
ENSG00000167526.14	0.0248855	RPL13	males
ENSG00000167674.15	0.00471944	HDGFL2	males
ENSG00000167778.9	0.0112671	SPRYD3	males
ENSG00000168172.9	0.00721599	HOOK3	males
ENSG00000169398.19	0.00874124	PTK2	males
ENSG00000169946.14	3.2204e-05	ZFPM2	males
ENSG00000170917.14	0.000190888	NUDT6	males
ENSG00000171206.15	0.00471944	TRIM8	males
ENSG00000171862.11	0.0484744	PTEN	males
ENSG00000172260.15	0.0201543	NEGR1	males
ENSG00000172331.12	0.0351519	BPGM	males
ENSG00000172986.13	0.00048932	GXYLT2	males
ENSG00000173040.13	0.0110578	EVC2	males
ENSG00000173511.10	0.00216864	VEGFB	males
ENSG00000174945.13	0.00529397	AMZ1	males
ENSG00000176046.9	0.0248014	NUPR1	males
ENSG00000177879.17	0.0350102	AP3S1	males
ENSG00000179010.14	0.0396463	MRFAP1	males
ENSG00000182247.10	0.0351519	UBE2E2	males
ENSG00000182492.16	0.0201543	BGN	males
ENSG00000186063.13	0.00733747	AIDA	males
ENSG00000187098.17	0.0248014	MITF	males
ENSG00000188761.13	0.0183773	BCL2L15	males
ENSG00000197265.9	0.0183773	GTF2E2	males
ENSG00000197713.15	0.0230744	RPE	males
ENSG00000198382.9	0.00403646	UVRAG	males
ENSG00000204272.13	0.00444809	NBDY	males
ENSG00000214113.11	0.00685345	LYRM4	males
ENSG00000224383.8	0.0112459	PRR29	males
ENSG00000254673.1	0.0206816	AC110275.1	males
ENSG00000255302.5	0.00915043	EID1	males
ENSG00000255529.9	0.00403646	POLR2M	males
ENSG00000264324.1	0.0206816	AC006030.1	males
ENSG00000279983.1	0.0164456	AC244517.10	males
ENSG00000283930.1	0.00350046	AL117339.4	males

## Sheet:  Esophagus-Mucosa
id	pval	Symbol	Sex
ENSG00000122592.8	0.000345676	HOXA7	females
ENSG00000124490.14	3.67859e-11	CRISP2	females
ENSG00000141255.13	8.24096e-05	SPATA22	females
ENSG00000142552.8	0.00019904	RCN3	females
ENSG00000164287.13	0.0407664	CDC20B	females
ENSG00000169946.14	1.46807e-06	ZFPM2	females
ENSG00000122592.8	1.25013e-07	HOXA7	males
ENSG00000124490.14	3.95851e-13	CRISP2	males
ENSG00000169946.14	0.00878714	ZFPM2	males
ENSG00000240303.8	1.8045e-06	ACAD11	males
ENSG00000286190.2	0.00457549	AC055839.2	males

## Sheet:  Heart-LeftVentricle
id	pval	Symbol	Sex
ENSG00000004779.10	0.00121975	NDUFAB1	females
ENSG00000010256.11	0.0332406	UQCRC1	females
ENSG00000062582.14	0.00111986	MRPS24	females
ENSG00000090266.13	0.00722313	NDUFB2	females
ENSG00000091483.7	0.0284867	FH	females
ENSG00000091640.8	0.000994769	SPAG7	females
ENSG00000099795.7	0.0447726	NDUFB7	females
ENSG00000101365.21	0.00209722	IDH3B	females
ENSG00000104879.5	0.0044813	CKM	females
ENSG00000106305.10	0.000174688	AIMP2	females
ENSG00000107745.19	0.0342994	MICU1	females
ENSG00000110011.13	0.0342994	DNAJC4	females
ENSG00000112651.12	0.047441	MRPL2	females
ENSG00000112695.11	0.0343957	COX7A2	females
ENSG00000114023.15	0.00672883	FAM162A	females
ENSG00000117118.10	0.00533829	SDHB	females
ENSG00000119013.9	0.00756792	NDUFB3	females
ENSG00000119421.7	6.81799e-05	NDUFA8	females
ENSG00000119689.15	0.000256912	DLST	females
ENSG00000121769.8	0.00411404	FABP3	females
ENSG00000127184.13	0.00343044	COX7C	females
ENSG00000127540.12	0.000321432	UQCR11	females
ENSG00000131143.10	0.0156671	COX4I1	females
ENSG00000131174.7	0.0115199	COX7B	females
ENSG00000132305.21	0.00381318	IMMT	females
ENSG00000133315.12	0.0447726	MACROD1	females
ENSG00000137547.9	0.0131399	MRPL15	females
ENSG00000139180.11	4.3523e-06	NDUFA9	females
ENSG00000140990.15	0.0128409	NDUFB10	females
ENSG00000143198.13	0.00413858	MGST3	females
ENSG00000145494.12	0.00381318	NDUFS6	females
ENSG00000150779.12	0.00411404	TIMM8B	females
ENSG00000151729.11	6.81799e-05	SLC25A4	females
ENSG00000154518.10	0.0132107	ATP5MC3	females
ENSG00000155463.14	0.0105057	OXA1L	females
ENSG00000156411.10	0.0191277	ATP5MPL	females
ENSG00000159199.14	0.00672883	ATP5MC1	females
ENSG00000160014.17	0.00111986	CALM3	females
ENSG00000160194.18	8.38716e-05	NDUFV3	females
ENSG00000164258.12	0.00431683	NDUFS4	females
ENSG00000164404.8	0.0203163	GDF9	females
ENSG00000165264.11	0.0306706	NDUFB6	females
ENSG00000166135.14	0.00381318	HIF1AN	females
ENSG00000169020.10	0.000580744	ATP5ME	females
ENSG00000170906.16	0.0132107	NDUFA3	females
ENSG00000173660.12	0.0340246	UQCRH	females
ENSG00000173915.16	0.0321025	ATP5MD	females
ENSG00000174021.11	3.50452e-05	GNG5	females
ENSG00000178127.13	0.00444728	NDUFV2	females
ENSG00000178741.12	0.00444728	COX5A	females
ENSG00000180901.11	6.81799e-05	KCTD2	females
ENSG00000182180.14	0.000342249	MRPS16	females
ENSG00000182712.16	3.50452e-05	CMC4	females
ENSG00000186010.19	1.28491e-05	NDUFA13	females
ENSG00000198125.13	4.92077e-05	MB	females
ENSG00000204316.13	0.0127498	MRPL38	females
ENSG00000204564.12	0.0044813	C6orf136	females
ENSG00000204568.12	0.00227372	MRPS18B	females
ENSG00000213619.11	0.000675824	NDUFS3	females
ENSG00000241837.7	0.000850056	ATP5PO	females
ENSG00000255639.3	0.0132107	AC005833.1	females
ENSG00000258674.5	0.0001046	AC011448.1	females
ENSG00000004779.10	0.0364665	NDUFAB1	males
ENSG00000062582.14	0.0289598	MRPS24	males
ENSG00000075415.13	0.0465598	SLC25A3	males
ENSG00000091640.8	0.0465598	SPAG7	males
ENSG00000099795.7	0.000708331	NDUFB7	males
ENSG00000101365.21	0.0261814	IDH3B	males
ENSG00000104879.5	3.43623e-09	CKM	males
ENSG00000106305.10	0.000223324	AIMP2	males
ENSG00000107745.19	0.0289598	MICU1	males
ENSG00000111652.10	0.0108265	COPS7A	males
ENSG00000112651.12	0.000923199	MRPL2	males
ENSG00000112695.11	0.0274988	COX7A2	males
ENSG00000116459.11	0.00606525	ATP5PB	males
ENSG00000117118.10	0.0229466	SDHB	males
ENSG00000126432.14	0.0160614	PRDX5	males
ENSG00000126749.16	0.00349272	EMG1	males
ENSG00000127184.13	0.00838666	COX7C	males
ENSG00000127540.12	0.0285603	UQCR11	males
ENSG00000131143.10	0.0107847	COX4I1	males
ENSG00000131174.7	0.00182741	COX7B	males
ENSG00000131828.14	3.00479e-05	PDHA1	males
ENSG00000137547.9	0.0105439	MRPL15	males
ENSG00000139180.11	0.000223324	NDUFA9	males
ENSG00000140990.15	0.0169196	NDUFB10	males
ENSG00000143198.13	0.0229466	MGST3	males
ENSG00000145349.17	0.0105021	CAMK2D	males
ENSG00000145494.12	1.25302e-06	NDUFS6	males
ENSG00000147123.11	0.00349352	NDUFB11	males
ENSG00000151729.11	0.0158706	SLC25A4	males
ENSG00000154719.14	0.0459876	MRPL39	males
ENSG00000156411.10	0.0412754	ATP5MPL	males
ENSG00000158864.13	0.0292944	NDUFS2	males
ENSG00000159199.14	0.0182673	ATP5MC1	males
ENSG00000163541.12	0.0169196	SUCLG1	males
ENSG00000164258.12	0.0278449	NDUFS4	males
ENSG00000164405.11	0.0459876	UQCRQ	males
ENSG00000165629.20	0.000292559	ATP5F1C	males
ENSG00000166902.5	0.000454156	MRPL16	males
ENSG00000167799.10	3.05013e-06	NUDT8	males
ENSG00000167863.12	0.000254563	ATP5PD	males
ENSG00000169020.10	5.44919e-05	ATP5ME	males
ENSG00000173660.12	0.000122293	UQCRH	males
ENSG00000173915.16	0.0181753	ATP5MD	males
ENSG00000176340.4	2.421e-05	COX8A	males
ENSG00000178741.12	0.0448601	COX5A	males
ENSG00000178982.10	0.0212536	EIF3K	males
ENSG00000180901.11	0.0464958	KCTD2	males
ENSG00000182154.8	0.0292944	MRPL41	males
ENSG00000184983.11	0.0295463	NDUFA6	males
ENSG00000189043.10	0.0464958	NDUFA4	males
ENSG00000197448.14	0.0015285	GSTK1	males
ENSG00000204228.4	0.00630032	HSD17B8	males
ENSG00000204316.13	0.0108265	MRPL38	males
ENSG00000204568.12	0.0160614	MRPS18B	males
ENSG00000213619.11	0.000507056	NDUFS3	males
ENSG00000241837.7	0.000409258	ATP5PO	males
ENSG00000256100.1	0.0261702	AP000721.1	males
ENSG00000258674.5	0.00258963	AC011448.1	males
ENSG00000260643.2	0.0285603	AC092718.3	males

## Sheet:  Lung
id	pval	Symbol	Sex
ENSG00000102466.16	0.000178797	FGF14	females
ENSG00000115165.10	0.000482575	CYTIP	females
ENSG00000131080.15	0.00293209	EDA2R	females
ENSG00000131400.8	0.00731029	NAPSA	females
ENSG00000133134.12	0.000217408	BEX2	females
ENSG00000143196.5	0.000863386	DPT	females
ENSG00000157765.13	0.000562573	SLC34A2	females
ENSG00000163453.11	4.77098e-10	IGFBP7	females
ENSG00000164056.11	0.00681344	SPRY1	females
ENSG00000168878.19	0.00119616	SFTPB	females
ENSG00000178343.5	0.0242203	SHISA3	females
ENSG00000178999.13	3.62542e-09	AURKB	females
ENSG00000115165.10	0.00581929	CYTIP	males
ENSG00000115252.18	0.00556252	PDE1A	males
ENSG00000131080.15	0.010538	EDA2R	males
ENSG00000133134.12	0.00579223	BEX2	males
ENSG00000157765.13	0.000390805	SLC34A2	males
ENSG00000163453.11	1.72736e-09	IGFBP7	males
ENSG00000164056.11	1.67082e-05	SPRY1	males
ENSG00000174567.8	0.0463973	GOLT1A	males

## Sheet:  Muscle-Skeletal
id	pval	Symbol	Sex
ENSG00000005020.13	0.000464995	SKAP2	females
ENSG00000044446.12	0.00319121	PHKA2	females
ENSG00000059588.10	0.00824098	TARBP1	females
ENSG00000095564.14	0.00137476	BTAF1	females
ENSG00000107929.15	0.0169196	LARP4B	females
ENSG00000112343.11	8.13004e-05	TRIM38	females
ENSG00000120798.17	0.00349272	NR2C1	females
ENSG00000121310.17	0.0432613	ECHDC2	females
ENSG00000123179.14	0.00014093	EBPL	females
ENSG00000123836.15	0.0465598	PFKFB2	females
ENSG00000124370.11	0.0432613	MCEE	females
ENSG00000129009.13	0.000590143	ISLR	females
ENSG00000130005.13	0.0464958	GAMT	females
ENSG00000133226.17	8.13004e-05	SRRM1	females
ENSG00000134020.8	0.0261702	PEBP4	females
ENSG00000134590.14	0.0017174	RTL8C	females
ENSG00000134884.15	0.0169196	ARGLU1	females
ENSG00000139597.18	0.00081226	N4BP2L1	females
ENSG00000140945.17	0.017757	CDH13	females
ENSG00000142089.16	9.51466e-05	IFITM3	females
ENSG00000145020.16	0.000250782	AMT	females
ENSG00000153904.21	0.00324928	DDAH1	females
ENSG00000157557.13	2.40517e-06	ETS2	females
ENSG00000162341.18	0.0150672	TPCN2	females
ENSG00000162494.6	0.0465598	LRRC38	females
ENSG00000162613.17	5.70265e-05	FUBP1	females
ENSG00000164056.11	0.000454156	SPRY1	females
ENSG00000170989.10	0.00406127	S1PR1	females
ENSG00000171960.12	0.00630032	PPIH	females
ENSG00000172399.6	0.0292944	MYOZ2	females
ENSG00000173267.14	0.000590143	SNCG	females
ENSG00000173269.14	0.00624691	MMRN2	females
ENSG00000175455.16	0.0464958	CCDC14	females
ENSG00000177084.18	0.0289598	POLE	females
ENSG00000178922.17	0.00292479	HYI	females
ENSG00000180964.17	0.00630032	TCEAL8	females
ENSG00000183479.12	0.0448601	TREX2	females
ENSG00000185946.16	0.0105439	RNPC3	females
ENSG00000186377.8	0.00511575	CYP4X1	females
ENSG00000197766.8	0.00606878	CFD	females
ENSG00000198947.16	0.0176009	DMD	females
ENSG00000204396.11	0.00319121	VWA7	females
ENSG00000215252.11	5.70265e-05	GOLGA8B	females
ENSG00000216921.9	0.00349272	FAM240C	females
ENSG00000228727.9	0.000708331	SAPCD1	females
ENSG00000240038.6	0.0295463	AMY2B	females
ENSG00000240184.7	0.0176009	PCDHGC3	females
ENSG00000253485.2	0.0448601	PCDHGA5	females
ENSG00000253537.3	0.000223324	PCDHGA7	females
ENSG00000253731.3	0.00630032	PCDHGA6	females
ENSG00000254221.2	0.0109006	PCDHGB1	females
ENSG00000261934.2	0.00931859	PCDHGA9	females
ENSG00000270149.5	0.0448601	AL591806.2	females
ENSG00000271810.5	0.000454156	AL603832.3	females
ENSG00000284779.2	0.000454156	AC132217.2	females
ENSG00000284862.3	0.000493896	CCDC39	females
ENSG00000005020.13	0.0302875	SKAP2	males
ENSG00000059588.10	0.0192232	TARBP1	males
ENSG00000095564.14	0.00878669	BTAF1	males
ENSG00000105707.14	0.000173658	HPN	males
ENSG00000107929.15	0.0247879	LARP4B	males
ENSG00000115361.8	0.022187	ACADL	males
ENSG00000123836.15	0.00371835	PFKFB2	males
ENSG00000129009.13	0.0066911	ISLR	males
ENSG00000130283.9	0.0290566	GDF1	males
ENSG00000138735.16	0.0375557	PDE5A	males
ENSG00000140688.17	0.0479278	RUSF1	males
ENSG00000142089.16	0.00174043	IFITM3	males
ENSG00000153904.21	0.00878639	DDAH1	males
ENSG00000173267.14	0.022187	SNCG	males
ENSG00000177084.18	0.0272217	POLE	males
ENSG00000185946.16	0.0119006	RNPC3	males
ENSG00000186377.8	0.00011076	CYP4X1	males
ENSG00000187186.15	0.0393967	AL162231.1	males
ENSG00000197766.8	0.0192232	CFD	males
ENSG00000203896.10	0.0100681	LIME1	males
ENSG00000204396.11	0.021796	VWA7	males
ENSG00000204956.5	0.0119006	PCDHGA1	males
ENSG00000215252.11	0.0247879	GOLGA8B	males
ENSG00000240038.6	0.00108514	AMY2B	males
ENSG00000253485.2	0.00089915	PCDHGA5	males
ENSG00000254245.3	0.00655489	PCDHGA3	males
ENSG00000261934.2	0.0247879	PCDHGA9	males

## Sheet:  Nerve-Tibial
id	pval	Symbol	Sex
ENSG00000095587.9	0.0399883	TLL2	females
ENSG00000131080.15	0.0250486	EDA2R	females
ENSG00000133169.6	0.0489121	BEX1	females
ENSG00000135643.5	0.00169446	KCNMB4	females
ENSG00000143171.13	0.0239546	RXRG	females
ENSG00000146090.16	0.000290253	RASGEF1C	females
ENSG00000148123.15	0.000295588	PLPPR1	females
ENSG00000148965.10	0.0118392	SAA4	females
ENSG00000149124.11	0.00814193	GLYAT	females
ENSG00000166426.8	0.0211111	CRABP1	females
ENSG00000168280.18	0.0480921	KIF5C	females
ENSG00000169418.10	0.0119334	NPR1	females
ENSG00000176204.13	0.00337945	LRRTM4	females
ENSG00000176244.7	0.00647864	ACBD7	females
ENSG00000180447.7	0.0111108	GAS1	females
ENSG00000181234.9	0.00182067	TMEM132C	females
ENSG00000185306.13	9.29984e-05	C12orf56	females
ENSG00000186847.6	0.000215714	KRT14	females
ENSG00000188257.12	0.00182067	PLA2G2A	females
ENSG00000198910.14	0.0302408	L1CAM	females
ENSG00000205143.3	0.0341562	ARID3C	females
ENSG00000285476.1	0.0489121	AC139491.7	females
ENSG00000095587.9	0.000135693	TLL2	males
ENSG00000110975.8	0.00858291	SYT10	males
ENSG00000113578.18	2.82141e-05	FGF1	males
ENSG00000117016.10	3.20087e-07	RIMS3	males
ENSG00000124920.14	0.0171253	MYRF	males
ENSG00000128872.10	0.0181689	TMOD2	males
ENSG00000133169.6	8.98674e-06	BEX1	males
ENSG00000135643.5	0.0286279	KCNMB4	males
ENSG00000137558.9	3.52467e-10	PI15	males
ENSG00000138615.6	0.0086455	CILP	males
ENSG00000148123.15	0.00384691	PLPPR1	males
ENSG00000153012.12	0.00965886	LGI2	males
ENSG00000158050.5	0.00505473	DUSP2	males
ENSG00000163564.15	0.00364461	PYHIN1	males
ENSG00000163710.9	0.000335695	PCOLCE2	males
ENSG00000163873.10	0.000135693	GRIK3	males
ENSG00000164107.9	0.000100322	HAND2	males
ENSG00000164418.21	0.0201487	GRIK2	males
ENSG00000166426.8	4.09497e-12	CRABP1	males
ENSG00000168280.18	0.00965886	KIF5C	males
ENSG00000169302.16	1.15674e-07	STK32A	males
ENSG00000171551.12	0.0158079	ECEL1	males
ENSG00000176244.7	4.62975e-07	ACBD7	males
ENSG00000179817.5	1.60241e-06	MRGPRX4	males
ENSG00000179826.7	0.000100322	MRGPRX3	males
ENSG00000180447.7	0.00365062	GAS1	males
ENSG00000181234.9	1.06393e-05	TMEM132C	males
ENSG00000182083.7	0.0105186	OR6B2	males
ENSG00000185306.13	7.79429e-08	C12orf56	males
ENSG00000186847.6	0.0388627	KRT14	males
ENSG00000188257.12	0.00101735	PLA2G2A	males
ENSG00000188487.12	0.00161647	INSC	males
ENSG00000205143.3	0.0171253	ARID3C	males
ENSG00000231389.7	0.0251445	HLA-DPA1	males
ENSG00000242689.3	2.00321e-07	CNTF	males
ENSG00000255071.3	0.0189258	SAA2-SAA4	males
ENSG00000269404.7	0.000315249	SPIB	males
ENSG00000285476.1	0.000159994	AC139491.7	males

[truncated: 3 more sheets:  Skin-SunExposed(Lowerleg),  Thyroid,  WholeBlood]
